# Supplementary material
Source: PubMed Central journal article supplement (PMC5316506)
Supplement: NIHMS811976-supplement-7.pdf [file NIHMS811976-supplement-7.pdf]

Supplementary Table 1

| Comparison of gene expression between glioma cells GL26 and M7 cells (Affymetrix Gene Chip Data) |               |                                                                                  |           |               |                 |             |
|--------------------------------------------------------------------------------------------------|---------------|----------------------------------------------------------------------------------|-----------|---------------|-----------------|-------------|
| Affymetrix Probe identifier                                                                      | Gene Symbol   | Description                                                                      | GenBank   | M7 expression | GL26 expression | Fold Change |
| 1448754_at                                                                                       | Rbp1          | retinol binding protein 1, cellular                                              | NM_011254 | 11.9324       | 3.3762          | 8.5563      |
| 1427262_at                                                                                       | Xist          | inactive X specific transcripts                                                  | L04961    | 11.2747       | 2.8100          | 8.4647      |
| 1448182_a_at                                                                                     | Cd24a         | CD24a antigen                                                                    | NM_009846 | 11.2867       | 2.8350          | 8.4517      |
| 1416072_at                                                                                       | Cd34          | CD34 antigen                                                                     | NM_133654 | 11.3653       | 3.1525          | 8.2128      |
| 1430700_a_at                                                                                     | Pla2g7        | phospholipase A2, group VII (platelet-activating factor acetylhydrolase, plasma) | AK005158  | 11.3513       | 3.4443          | 7.9071      |
| 1448169_at                                                                                       | Krt18         | keratin 18                                                                       | NM_010664 | 10.8594       | 3.1650          | 7.6945      |
| 1456475_s_at                                                                                     | Prkar2b       | protein kinase, cAMP dependent regulatory, type II beta                          | BB216074  | 10.3735       | 2.7149          | 7.6585      |
| 1448961_at                                                                                       | Plscr2        | phospholipid scramblase 2                                                        | NM_008880 | 9.8895        | 2.2443          | 7.6452      |
| 1448162_at                                                                                       | Vcam1         | vascular cell adhesion molecule 1                                                | BB250384  | 11.6707       | 4.0372          | 7.6336      |
| 1427183_at                                                                                       | Efemp1        | epidermal growth factor-containing fibulin-like extracellular matrix protein 1   | BC023060  | 10.5180       | 2.8966          | 7.6214      |
| 1416953_at                                                                                       | Ctgf          | connective tissue growth factor                                                  | NM_010217 | 11.7358       | 4.1689          | 7.5669      |
| 1418203_at                                                                                       | Pmaip1        | phorbol-12-myristate-13-acetate-induced protein 1                                | NM_021451 | 10.1483       | 2.5992          | 7.5491      |
| 1424254_at                                                                                       | Ifitm1        | interferon induced transmembrane protein 1                                       | BC027285  | 12.2968       | 4.7747          | 7.5221      |
| 1424800_at                                                                                       | Enah          | enabled homolog (Drosophila)                                                     | BQ044016  | 10.6460       | 3.1525          | 7.4935      |
| 1438664_at                                                                                       | Prkar2b       | protein kinase, cAMP dependent regulatory, type II beta                          | BB216074  | 9.6444        | 2.3979          | 7.2465      |
| 1420624_a_at                                                                                     | Vamp8         | vesicle-associated membrane protein 8                                            | NM_016794 | 10.2295       | 3.0227          | 7.2068      |
| 1437502_x_at                                                                                     | Cd24a         | CD24a antigen                                                                    | BB560574  | 9.5990        | 2.3979          | 7.2011      |
| 1423259_at                                                                                       | Id4           | inhibitor of DNA binding 4                                                       | BB121406  | 9.6991        | 2.5612          | 7.1378      |
| 1427263_at                                                                                       | Xist          | inactive X specific transcripts                                                  | L04961    | 10.7077       | 3.5815          | 7.1263      |
| 1433694_at                                                                                       | Pde3b         | phosphodiesterase 3B, cGMP-inhibited                                             | AV270888  | 11.0081       | 3.9024          | 7.1057      |
| 1436936_s_at                                                                                     | Xist          | inactive X specific transcripts                                                  | BG806300  | 11.6030       | 4.6127          | 6.9903      |
| 1436448_a_at                                                                                     | Ptgs1         | prostaglandin-endoperoxide synthase 1                                            | AA833146  | 10.1787       | 3.1902          | 6.9886      |
| 1421811_at                                                                                       | Thbs1         | thrombospondin 1                                                                 | AI385532  | 10.4176       | 3.4443          | 6.9734      |
| 1417262_at                                                                                       | Ptgs2         | prostaglandin-endoperoxide synthase 2                                            | M94967    | 11.3593       | 4.3997          | 6.9596      |
| 1416034_at                                                                                       | Cd24a         | CD24a antigen                                                                    | NM_009846 | 10.5012       | 3.5815          | 6.9197      |
| 1425964_x_at                                                                                     | Hspb1         | heat shock protein 1                                                             | U03561    | 11.9221       | 5.0176          | 6.9046      |
| 1453317_a_at                                                                                     | Khdrbs3       | KH domain containing, RNA binding, signal transduction associated 3              | AK014353  | 9.9713        | 3.1525          | 6.8188      |
| 1456174_x_at                                                                                     | Ndr1          | N-myc downstream regulated gene 1                                                | AV309418  | 11.0931       | 4.2966          | 6.7965      |
| 1453282_at                                                                                       | Cxadr         | coxsackie virus and adenovirus receptor                                          | BE824924  | 9.6261        | 2.8966          | 6.7295      |
| 1424051_at                                                                                       | Col4a2        | collagen, type IV, alpha 2                                                       | BC013560  | 10.5889       | 3.9364          | 6.6525      |
| 1420991_at                                                                                       | Ankrd1        | ankyrin repeat domain 1 (cardiac muscle)                                         | AK009959  | 9.5299        | 2.8966          | 6.6334      |
| 1417263_at                                                                                       | Ptgs2         | prostaglandin-endoperoxide synthase 2                                            | M94967    | 9.8853        | 3.2638          | 6.6215      |
| 1422317_a_at                                                                                     | Il1rl1        | interleukin 1 receptor-like 1                                                    | NM_010743 | 10.3658       | 3.7575          | 6.6083      |
| 1419209_at                                                                                       | Cxcl1         | chemokine (C-X-C motif) ligand 1                                                 | NM_008176 | 9.6688        | 3.0872          | 6.5816      |
| 1424659_at                                                                                       | Slit2         | slit homolog 2 (Drosophila)                                                      | BG963150  | 9.5009        | 2.9592          | 6.5418      |
| 1418726_a_at                                                                                     | Tnnt2         | troponin T2, cardiac                                                             | NM_011619 | 11.0835       | 4.6056          | 6.4779      |
| 1420992_at                                                                                       | Ankrd1        | ankyrin repeat domain 1 (cardiac muscle)                                         | AK009959  | 9.7801        | 3.3086          | 6.4715      |
| 1453275_at                                                                                       | 2310002L13Rik | RIKEN cDNA 2310002L13 gene                                                       | AK009098  | 9.5985        | 3.1525          | 6.4460      |
| 1449254_at                                                                                       | Spp1          | secreted phosphoprotein 1                                                        | NM_009263 | 12.8838       | 6.4409          | 6.4429      |
| 1449314_at                                                                                       | Zfp2          | zinc finger protein, multitype 2                                                 | NM_011766 | 9.9496        | 3.5138          | 6.4358      |
| 1455627_at                                                                                       | Col8a1        | collagen, type VIII, alpha 1                                                     | AV292255  | 11.4760       | 5.0503          | 6.4256      |
| 1449203_at                                                                                       | Slco1a5       | solute carrier organic anion transporter family, member 1a5                      | NM_130861 | 9.8406        | 3.4224          | 6.4182      |
| 1426622_a_at                                                                                     | Qpct          | glutaminyl-peptide cyclotransferase (glutaminyl cyclase)                         | BB150720  | 9.4366        | 3.0227          | 6.4139      |
| 1420760_s_at                                                                                     | Ndr1          | N-myc downstream regulated gene 1                                                | NM_008681 | 10.7821       | 4.3893          | 6.3928      |
| 1437360_at                                                                                       | Pcdh19        | protocadherin 19                                                                 | BB053591  | 10.2166       | 3.8700          | 6.3466      |
| 1422943_a_at                                                                                     | Hspb1         | heat shock protein 1                                                             | NM_013560 | 12.3877       | 6.0489          | 6.3388      |
| 1436729_at                                                                                       | Afap1         | actin filament associated protein 1                                              | AV328634  | 9.2018        | 2.9592          | 6.2427      |
| 1460419_a_at                                                                                     | Prkcb         | protein kinase C, beta                                                           | X59274    | 9.6599        | 3.4443          | 6.2157      |
| 1419309_at                                                                                       | Pdpm          | podoplanin                                                                       | NM_010329 | 10.2286       | 4.0427          | 6.1859      |
| 1423407_a_at                                                                                     | Fbln2         | fibulin 2                                                                        | BF228318  | 9.8358        | 3.6503          | 6.1855      |
| 1452035_at                                                                                       | Col4a1        | collagen, type IV, alpha 1                                                       | BF158638  | 11.9677       | 5.9119          | 6.0558      |

|              |          |                                                                                        |           |         |        |        |
|--------------|----------|----------------------------------------------------------------------------------------|-----------|---------|--------|--------|
| 1451501_a_at | Ghr      | growth hormone receptor                                                                | BC024375  | 11.6290 | 5.5812 | 6.0478 |
| 1426910_at   | Pawr     | PRKC, apoptosis, WT1, regulator                                                        | BB398886  | 10.2616 | 4.2333 | 6.0282 |
| 1457042_at   | AI256396 | EST AI256396                                                                           | BB328287  | 9.2221  | 3.1972 | 6.0249 |
| 1419086_at   | Fgfbp1   | fibroblast growth factor binding protein 1                                             | U49641    | 10.2979 | 4.2966 | 6.0013 |
| 1434442_at   | Stbd1    | starch binding domain 1                                                                | BB667844  | 9.0880  | 3.0872 | 6.0008 |
| 1439766_x_at | Vegfc    | vascular endothelial growth factor C                                                   | BB089170  | 8.5104  | 2.5612 | 5.9492 |
| 1424759_at   | Arrdc4   | arrestin domain containing 4                                                           | BC017528  | 9.0765  | 3.1701 | 5.9064 |
| 1452740_at   | Myh10    | myosin, heavy polypeptide 10, non-muscle                                               | BQ176159  | 9.8343  | 3.9701 | 5.8642 |
| 1434280_at   |          |                                                                                        | BG976607  | 11.4138 | 5.5610 | 5.8528 |
| 1415989_at   | Vcam1    | vascular cell adhesion molecule 1                                                      | BB250384  | 10.3399 | 4.5566 | 5.7833 |
| 1419123_a_at | Pdgfc    | platelet-derived growth factor, C polypeptide                                          | NM_019971 | 8.7250  | 2.9526 | 5.7724 |
| 1419431_at   | Ereg     | epiregulin                                                                             | NM_007950 | 8.7081  | 2.9592 | 5.7489 |
| 1449147_at   | Chst1    | carbohydrate (keratan sulfate Gal-6) sulfotransferase 1                                | NM_023850 | 9.8513  | 4.1035 | 5.7479 |
| 1424967_x_at | Tnnt2    | troponin T2, cardiac                                                                   | L47552    | 10.9178 | 5.2306 | 5.6871 |
| 1428114_at   | Slc14a1  | solute carrier family 14 (urea transporter), member 1                                  | AW556396  | 8.6683  | 3.0227 | 5.6456 |
| 1432331_a_at | Prrx2    | paired related homeobox 2                                                              | AK019971  | 8.8554  | 3.2638 | 5.5917 |
| 1447364_x_at | Myo1b    | myosin IB                                                                              | AA406997  | 8.7681  | 3.1972 | 5.5708 |
| 1454788_at   | Arl4c    | ADP-ribosylation factor-like 4C                                                        | BQ176306  | 10.7358 | 5.1653 | 5.5705 |
| 1449865_at   | Sema3a   | sema domain, immunoglobulin domain (Ig), short basic domain, secreted, (semaphorin) 3A | NM_009152 | 9.2677  | 3.7192 | 5.5484 |
| 1448925_at   | Twist2   | twist homolog 2 (Drosophila)                                                           | NM_007855 | 9.6841  | 4.1392 | 5.5450 |
| 1421134_at   | Areg     | amphiregulin                                                                           | NM_009704 | 10.5867 | 5.0544 | 5.5323 |
| 1447643_x_at | Snai2    | snail homolog 2 (Drosophila)                                                           | BB040443  | 9.3209  | 3.8342 | 5.4867 |
| 1423413_at   | Ndrp1    | N-myc downstream regulated gene 1                                                      | AI987929  | 8.7622  | 3.3086 | 5.4537 |
| 1434447_at   | Met      | met proto-oncogene                                                                     | BG060788  | 9.8573  | 4.4990 | 5.3583 |
| 1437190_at   | Styk1    | serine/threonine/tyrosine kinase 1                                                     | AV375472  | 9.1846  | 3.8342 | 5.3503 |
| 1417962_s_at | Ghr      | growth hormone receptor                                                                | NM_010284 | 12.1145 | 6.7709 | 5.3435 |
| 1448990_a_at | Myo1b    | myosin IB                                                                              | AI255256  | 9.4993  | 4.1689 | 5.3304 |
| 1436200_at   | Lonrf3   | LON peptidase N-terminal domain and ring finger 3                                      | BE956940  | 9.1870  | 3.9007 | 5.2864 |
| 1423414_at   | Ptgs1    | prostaglandin-endoperoxide synthase 1                                                  | BB520073  | 9.6410  | 4.3588 | 5.2822 |
| 1449070_x_at | Apcdd1   | adenomatosis polyposis coli down-regulated 1                                           | BB770932  | 8.1810  | 2.9178 | 5.2632 |
| 1428804_at   | Mfap3l   | microfibrillar-associated protein 3-like                                               | AK017269  | 9.8742  | 4.6127 | 5.2615 |
| 1420416_at   | Sema3a   | sema domain, immunoglobulin domain (Ig), short basic domain, secreted, (semaphorin) 3A | NM_009152 | 8.9806  | 3.7192 | 5.2614 |
| 1418910_at   | Bmp7     | bone morphogenetic protein 7                                                           | NM_007557 | 8.5618  | 3.3086 | 5.2532 |
| 1419417_at   | Vegfc    | vascular endothelial growth factor C                                                   | NM_009506 | 7.9141  | 2.6628 | 5.2513 |
| 1455145_at   | Pcdh19   | protocadherin 19                                                                       | BM115577  | 9.6991  | 4.4935 | 5.2056 |
| 1417023_a_at | Fabp4    | fatty acid binding protein 4, adipocyte                                                | NM_024406 | 8.3497  | 3.1525 | 5.1971 |
| 1423635_at   | Bmp2     | bone morphogenetic protein 2                                                           | AV239587  | 8.3322  | 3.1440 | 5.1882 |
| 1428572_at   | Basp1    | brain abundant, membrane attached signal protein 1                                     | AK011545  | 10.6935 | 5.5301 | 5.1634 |
| 1424890_at   | Bnc1     | basonuclin 1                                                                           | U88064    | 8.4060  | 3.2638 | 5.1423 |
| 1434873_a_at | Acap1    | ArfGAP with coiled-coil, ankyrin repeat and PH domains 1                               | BB115902  | 9.7031  | 4.5648 | 5.1383 |
| 1426951_at   | Crim1    | cysteine rich transmembrane BMP regulator 1 (chordin like)                             | AK018666  | 8.5656  | 3.4443 | 5.1213 |
| 1422053_at   | Inhba    | inhibin beta-A                                                                         | NM_008380 | 10.4863 | 5.3765 | 5.1098 |
| 1456858_at   | Gpr149   | G protein-coupled receptor 149                                                         | BB075339  | 8.1215  | 3.0227 | 5.0988 |
| 1420514_at   | Tmem47   | transmembrane protein 47                                                               | NM_138751 | 7.7663  | 2.7149 | 5.0513 |
| 1437453_s_at | Pcsk9    | proprotein convertase subtilisin/kexin type 9                                          | AV010795  | 9.9135  | 4.8719 | 5.0416 |
| 1419639_at   | Efnb2    | ephrin B2                                                                              | U30244    | 7.8411  | 2.8013 | 5.0398 |
| 1449252_at   | Fam110c  | family with sequence similarity 110, member C                                          | NM_027828 | 8.8723  | 3.8342 | 5.0381 |
| 1418478_at   | Lmo1     | LIM domain only 1                                                                      | NM_057173 | 9.5234  | 4.4990 | 5.0244 |
| 1455223_at   | Igf2bp1  | insulin-like growth factor 2 mRNA binding protein 1                                    | BB794657  | 8.2848  | 3.2638 | 5.0211 |
| 1460081_at   | Syt7     | synaptotagmin VII                                                                      | AI854420  | 8.6567  | 3.6503 | 5.0064 |
| 1433474_at   | Edil3    | EGF-like repeats and discoidin I-like domains 3                                        | BB377340  | 8.7547  | 3.7571 | 4.9976 |
| 1459713_s_at | Ano1     | anoctamin 1, calcium activated chloride channel                                        | AU040576  | 10.3930 | 5.4108 | 4.9822 |
| 1425039_at   | Itgbl1   | integrin, beta-like 1                                                                  | BC020152  | 8.2458  | 3.2638 | 4.9820 |
| 1440397_at   | Cacna2d1 | calcium channel, voltage-dependent, alpha2/delta subunit 1                             | BB464523  | 7.9091  | 2.9325 | 4.9766 |
| 1419186_a_at | St8sia4  | ST8 alpha-N-acetyl-neuraminide alpha-2,8-sialyltransferase 4                           | NM_009183 | 8.4201  | 3.4443 | 4.9759 |

|              |               |                                                                                                                                 |           |         |        |        |
|--------------|---------------|---------------------------------------------------------------------------------------------------------------------------------|-----------|---------|--------|--------|
| 1420380_at   | Ccl2          | chemokine (C-C motif) ligand 2                                                                                                  | AF065933  | 10.8318 | 5.8632 | 4.9686 |
| 1459679_s_at | Myo1b         | myosin IB                                                                                                                       | AA406997  | 9.6277  | 4.6674 | 4.9603 |
| 1429893_at   | Il17rd        | interleukin 17 receptor D                                                                                                       | AK012666  | 8.3971  | 3.4443 | 4.9529 |
| 1416158_at   | Nr2f2         | nuclear receptor subfamily 2, group F, member 2                                                                                 | AI463873  | 7.3970  | 2.4513 | 4.9457 |
| 1440739_at   | Vegfc         | vascular endothelial growth factor C                                                                                            | AW228853  | 7.7133  | 2.7705 | 4.9428 |
| 1416299_at   | Shcbp1        | Shc SH2-domain binding protein 1                                                                                                | NM_011369 | 10.4914 | 5.5610 | 4.9304 |
| 1433795_at   | Tgfb3         | transforming growth factor, beta receptor III                                                                                   | BM122301  | 9.5331  | 4.6127 | 4.9203 |
| 1422437_at   | Col5a2        | collagen, type V, alpha 2                                                                                                       | AV229424  | 9.2140  | 4.2966 | 4.9174 |
| 1445720_at   | Sltm          | SAFB-like, transcription modulator                                                                                              | BB206801  | 9.7384  | 4.8229 | 4.9155 |
| 1449133_at   | Sprr1a        | small proline-rich protein 1A                                                                                                   | NM_009264 | 9.1969  | 4.2966 | 4.9003 |
| 1419638_at   | Efnb2         | ephrin B2                                                                                                                       | U30244    | 7.8527  | 2.9592 | 4.8936 |
| 1458802_at   | Hivep3        | human immunodeficiency virus type I enhancer binding protein 3                                                                  | BB164127  | 8.2662  | 3.3762 | 4.8900 |
| 1449893_a_at | Lrig1         | leucine-rich repeats and immunoglobulin-like domains 1                                                                          | NM_008377 | 9.5002  | 4.6127 | 4.8875 |
| 1416159_at   | Nr2f2         | nuclear receptor subfamily 2, group F, member 2                                                                                 | AI463873  | 9.8053  | 4.9195 | 4.8858 |
| 1421979_at   | Phex          | phosphate regulating gene with homologies to endopeptidases on the X chromosome (hypophosphatemia, vitamin D resistant rickets) | U73910    | 8.4466  | 3.5815 | 4.8651 |
| 1429863_at   | Lonrf3        | LON peptidase N-terminal domain and ring finger 3                                                                               | AK016522  | 7.7949  | 2.9592 | 4.8357 |
| 1416382_at   | Ctsc          | cathepsin C                                                                                                                     | NM_009982 | 7.6683  | 2.8380 | 4.8304 |
| 1428393_at   | Nrn1          | neuritin 1                                                                                                                      | AK003046  | 8.7234  | 3.9118 | 4.8116 |
| 1426348_at   | Col4a1        | collagen, type IV, alpha 1                                                                                                      | BF158638  | 9.6316  | 4.8229 | 4.8087 |
| 1426127_x_at | Klra18        | killer cell lectin-like receptor, subfamily A, member 18                                                                        | AF288377  | 11.0902 | 6.3015 | 4.7887 |
| 1425145_at   | Il1rl1        | interleukin 1 receptor-like 1                                                                                                   | D13695    | 9.6003  | 4.8129 | 4.7874 |
| 1455647_at   | Ar            | androgen receptor                                                                                                               | BB148302  | 8.3638  | 3.5815 | 4.7823 |
| 1418569_at   | Fblim1        | filamin binding LIM protein 1                                                                                                   | BG070068  | 10.0082 | 5.2306 | 4.7775 |
| 1444302_at   | Gxytl2        | glucoside xylosyltransferase 2                                                                                                  | AV278332  | 9.4427  | 4.6674 | 4.7752 |
| 1437155_a_at | Wwtr1         | WW domain containing transcription regulator 1                                                                                  | BG066193  | 12.6463 | 7.8737 | 4.7726 |
| 1422706_at   | Pmepa1        | prostate transmembrane protein, androgen induced 1                                                                              | AV370981  | 10.8574 | 6.0970 | 4.7604 |
| 1426865_a_at | Ncam1         | neural cell adhesion molecule 1                                                                                                 | BB698413  | 8.5458  | 3.7880 | 4.7579 |
| 1424885_at   | Klhc8a        | kelch domain containing 8A                                                                                                      | BC011135  | 8.4661  | 3.7192 | 4.7469 |
| 1449586_at   | Pkp1          | plakophilin 1                                                                                                                   | NM_019645 | 8.1283  | 3.3948 | 4.7335 |
| 1434678_at   | Mbnl3         | muscleblind-like 3 (Drosophila)                                                                                                 | AV306759  | 7.7264  | 2.9949 | 4.7314 |
| 1455096_at   | Flrt2         | fibronectin leucine rich transmembrane protein 2                                                                                | AW555664  | 8.2314  | 3.5127 | 4.7187 |
| 1424595_at   | F11r          | F11 receptor                                                                                                                    | BC021876  | 9.2140  | 4.4980 | 4.7160 |
| 1436194_at   | Preli2        | PRELI domain containing 2                                                                                                       | BE985366  | 9.4836  | 4.7725 | 4.7110 |
| 1417817_a_at | Wwtr1         | WW domain containing transcription regulator 1                                                                                  | BC014727  | 12.8617 | 8.1559 | 4.7058 |
| 1424826_s_at | Mtss1         | metastasis suppressor 1                                                                                                         | BC024131  | 8.7309  | 4.0560 | 4.6749 |
| 1423478_at   | Prkcb         | protein kinase C, beta                                                                                                          | BF660388  | 8.1851  | 3.5127 | 4.6724 |
| 1438353_at   |               |                                                                                                                                 | AW543049  | 10.6911 | 6.0270 | 4.6641 |
| 1454745_at   | Arhgap29      | Rho GTPase activating protein 29                                                                                                | BG074320  | 9.4148  | 4.7704 | 4.6443 |
| 1424950_at   | Sox9          | SRY-box containing gene 9                                                                                                       | BC024958  | 8.4133  | 3.7738 | 4.6395 |
| 1438659_x_at | Chchd6        | coiled-coil-helix-coiled-coil-helix domain containing 6                                                                         | BB458460  | 7.7877  | 3.1525 | 4.6352 |
| 1429846_at   | 9030411K21Rik | RIKEN cDNA 9030411K21 gene                                                                                                      | BM250766  | 9.7969  | 5.1653 | 4.6316 |
| 1418761_at   | Igf2bp1       | insulin-like growth factor 2 mRNA binding protein 1                                                                             | BB499476  | 8.9160  | 4.2966 | 4.6194 |
| 1434210_s_at | Lrig1         | leucine-rich repeats and immunoglobulin-like domains 1                                                                          | AV174595  | 9.9923  | 5.3765 | 4.6158 |
| 1416805_at   | Fam198b       | family with sequence similarity 198, member B                                                                                   | NM_133187 | 7.5666  | 2.9592 | 4.6074 |
| 1418440_at   | Col8a1        | collagen, type VIII, alpha 1                                                                                                    | NM_007739 | 10.0833 | 5.4771 | 4.6062 |
| 1420498_a_at | Dab2          | disabled 2, mitogen-responsive phosphoprotein                                                                                   | NM_023118 | 9.8745  | 5.2685 | 4.6060 |
| 1423281_at   | Stmn2         | stathmin-like 2                                                                                                                 | BM115022  | 7.9101  | 3.3086 | 4.6016 |
| 1435137_s_at |               |                                                                                                                                 | BB119177  | 13.4251 | 8.8304 | 4.5947 |
| 1453238_s_at |               |                                                                                                                                 | AU018141  | 12.7838 | 8.2314 | 4.5524 |
| 1427932_s_at |               |                                                                                                                                 | BI076834  | 13.5215 | 8.9979 | 4.5236 |
| 1454822_x_at | Apcdd1        | adenomatous polyposis coli down-regulated 1                                                                                     | BB271021  | 8.1032  | 3.5815 | 4.5217 |
| 1422788_at   | Slc43a3       | solute carrier family 43, member 3                                                                                              | NM_021398 | 8.0327  | 3.5127 | 4.5200 |
| 1429089_s_at | 2900026A02Rik | RIKEN cDNA 2900026A02 gene                                                                                                      | BG063749  | 8.4156  | 3.9024 | 4.5132 |
| 1438210_at   | Gpr149        | G protein-coupled receptor 149                                                                                                  | BB126999  | 7.6590  | 3.1525 | 4.5065 |

|              |               |                                                                                        |           |         |        |        |
|--------------|---------------|----------------------------------------------------------------------------------------|-----------|---------|--------|--------|
| 1430640_a_at | Prkar2b       | protein kinase, cAMP dependent regulatory, type II beta                                | BI695530  | 7.6476  | 3.1507 | 4.4968 |
| 1434754_at   | Rap1gap2      | RAP1 GTPase activating protein 2                                                       | AU067654  | 8.1411  | 3.6476 | 4.4934 |
| 1441927_at   | Syt7          | synaptotagmin VII                                                                      | AV138438  | 8.8894  | 4.3997 | 4.4897 |
| 1450976_at   | Ndrp1         | N-myc downstream regulated gene 1                                                      | AI987929  | 9.6472  | 5.1653 | 4.4819 |
| 1418879_at   | Fam110c       | family with sequence similarity 110, member C                                          | NM_027828 | 9.8037  | 5.3414 | 4.4623 |
| 1451780_at   | Blnk          | B cell linker                                                                          | AF068182  | 8.5636  | 4.1054 | 4.4583 |
| 1419184_a_at | Fhl2          | four and a half LIM domains 2                                                          | NM_010212 | 10.7377 | 6.2824 | 4.4553 |
| 1460330_at   | Anxa3         | annexin A3                                                                             | AW702161  | 12.3474 | 7.8961 | 4.4513 |
| 1435162_at   | Prkg2         | protein kinase, cGMP-dependent, type II                                                | BB823350  | 11.7590 | 7.3208 | 4.4382 |
| 1422603_at   | Rnase4        | ribonuclease, RNase A family 4                                                         | BC005569  | 7.5417  | 3.1132 | 4.4285 |
| 1443426_at   | Sltm          | SAFB-like, transcription modulator                                                     | BB425367  | 9.0388  | 4.6127 | 4.4261 |
| 1439153_at   | Rnf144b       | ring finger protein 144B                                                               | AV274826  | 9.0631  | 4.6674 | 4.3956 |
| 1448931_at   | F2r1          | coagulation factor II (thrombin) receptor-like 1                                       | NM_007974 | 8.2276  | 3.8342 | 4.3933 |
| 1423062_at   | Igfbp3        | insulin-like growth factor binding protein 3                                           | AV175389  | 7.0702  | 2.6794 | 4.3908 |
| 1430792_at   |               |                                                                                        | AK014334  | 7.6284  | 3.2432 | 4.3852 |
| 1457424_at   | Eya1          | eyes absent 1 homolog (Drosophila)                                                     | BB760085  | 8.2709  | 3.9096 | 4.3613 |
| 1428909_at   | A130040M12Rik | RIKEN cDNA A130040M12 gene                                                             | C85657    | 11.0873 | 6.7353 | 4.3521 |
| 1443771_x_at | Smad7         | SMAD family member 7                                                                   | BB241324  | 7.7958  | 3.4443 | 4.3515 |
| 1434340_at   | Uqcr10        | ubiquinol-cytochrome c reductase, complex III subunit X                                | BF681728  | 9.3485  | 5.0107 | 4.3377 |
| 1424250_a_at | Arhgef3       | Rho guanine nucleotide exchange factor (GEF) 3                                         | BC012262  | 7.1434  | 2.8097 | 4.3337 |
| 1449141_at   | Fblim1        | filamin binding LIM protein 1                                                          | BG070068  | 9.8211  | 5.4900 | 4.3311 |
| 1450924_at   | Hdgfrp3       | hepatoma-derived growth factor, related protein 3                                      | BB291880  | 7.0755  | 2.7465 | 4.3290 |
| 1417156_at   | Krt19         | keratin 19                                                                             | NM_008471 | 8.7864  | 4.4597 | 4.3268 |
| 1451538_at   | Sox9          | SRY-box containing gene 9                                                              | BC024958  | 9.2365  | 4.9195 | 4.3170 |
| 1458236_at   |               |                                                                                        | BB657751  | 7.4682  | 3.1525 | 4.3157 |
| 1455238_at   | Mum11         | melanoma associated antigen (mutated) 1-like 1                                         | BB103233  | 9.4211  | 5.1060 | 4.3151 |
| 1419149_at   | Serpine1      | serine (or cysteine) peptidase inhibitor, clade E, member 1                            | NM_008871 | 10.3625 | 6.0489 | 4.3136 |
| 1436475_at   | Nr2f2         | nuclear receptor subfamily 2, group F, member 2                                        | AI527205  | 8.0923  | 3.7880 | 4.3043 |
| 1438861_at   | Bnc2          | basonuclin 2                                                                           | BB482899  | 8.5363  | 4.2333 | 4.3030 |
| 1419717_at   | Sema3e        | sema domain, immunoglobulin domain (Ig), short basic domain, secreted, (semaphorin) 3E | NM_011348 | 8.3585  | 4.0663 | 4.2922 |
| 1457644_s_at | Cxcl1         | chemokine (C-X-C motif) ligand 1                                                       | BB554288  | 10.4711 | 6.1807 | 4.2903 |
| 1428484_at   | Osbpl3        | oxysterol binding protein-like 3                                                       | AK004768  | 10.0289 | 5.7515 | 4.2774 |
| 1451314_a_at | Vcam1         | vascular cell adhesion molecule 1                                                      | L08431    | 9.3185  | 5.0544 | 4.2640 |
| 1436218_at   | Lgr6          | leucine-rich repeat-containing G protein-coupled receptor 6                            | AV337396  | 8.3541  | 4.1035 | 4.2506 |
| 1419735_at   | Csn3          | casein kappa                                                                           | NM_007786 | 10.0174 | 5.7988 | 4.2186 |
| 1433594_at   | Commd2        | COMM domain containing 2                                                               | BI412929  | 12.7362 | 8.5178 | 4.2183 |
| 1421151_a_at | Epha2         | Eph receptor A2                                                                        | NM_010139 | 10.6140 | 6.3985 | 4.2154 |
| 1427760_s_at |               |                                                                                        | X75557    | 10.0994 | 5.8877 | 4.2117 |
| 1416077_at   | Adm           | adrenomedullin                                                                         | NM_009627 | 9.4011  | 5.1918 | 4.2094 |
| 1417273_at   | Pdk4          | pyruvate dehydrogenase kinase, isoenzyme 4                                             | NM_013743 | 7.1636  | 2.9592 | 4.2044 |
| 1437064_at   | Ar            | androgen receptor                                                                      | AV232123  | 8.0455  | 3.8438 | 4.2018 |
| 1445882_at   | Cd300lb       | CD300 antigen like family member B                                                     | BB230267  | 6.9761  | 2.7744 | 4.2017 |
| 1442226_at   | Sema3e        | sema domain, immunoglobulin domain (Ig), short basic domain, secreted, (semaphorin) 3E | AV348197  | 7.9307  | 3.7298 | 4.2009 |
| 1435640_x_at | A130040M12Rik | RIKEN cDNA A130040M12 gene                                                             | BE634869  | 8.2371  | 4.0372 | 4.1999 |
| 1452952_at   | 9030418K01Rik | RIKEN cDNA 9030418K01 gene                                                             | AK018518  | 8.3661  | 4.1689 | 4.1972 |
| 1449164_at   | Cd68          | CD68 antigen                                                                           | BC021637  | 8.4914  | 4.2966 | 4.1947 |
| 1434474_at   | Abca5         | ATP-binding cassette, sub-family A (ABC1), member 5                                    | BM937648  | 8.3123  | 4.1205 | 4.1918 |
| 1426942_at   | Aim1          | absent in melanoma 1                                                                   | BM233292  | 6.9605  | 2.7744 | 4.1861 |
| 1435088_at   | Nsd1          | nuclear receptor-binding SET-domain protein 1                                          | BM945177  | 7.7606  | 3.5815 | 4.1791 |
| 1434325_x_at | Prkar1b       | protein kinase, cAMP dependent regulatory, type I beta                                 | BB274009  | 10.3633 | 6.1857 | 4.1776 |
| 1416160_at   | Nr2f2         | nuclear receptor subfamily 2, group F, member 2                                        | AI463873  | 7.3254  | 3.1525 | 4.1729 |
| 1451263_a_at | Fabp4         | fatty acid binding protein 4, adipocyte                                                | BC002148  | 6.9291  | 2.7744 | 4.1547 |
| 1420620_a_at | Rnf13         | ring finger protein 13                                                                 | NM_011883 | 11.3446 | 7.1929 | 4.1517 |
| 1428663_at   | Sgms2         | sphingomyelin synthase 2                                                               | AK017223  | 9.0880  | 4.9393 | 4.1487 |

|              |               |                                                                          |           |         |        |        |
|--------------|---------------|--------------------------------------------------------------------------|-----------|---------|--------|--------|
| 1435460_at   | Prkg2         | protein kinase, cGMP-dependent, type II                                  | BB363188  | 11.9236 | 7.7882 | 4.1354 |
| 1426300_at   | Alcam         | activated leukocyte cell adhesion molecule                               | U95030    | 10.3025 | 6.1807 | 4.1218 |
| 1440767_at   | Defb41        | defensin beta 41                                                         | BB787829  | 6.9450  | 2.8350 | 4.1100 |
| 1449351_s_at | Pdgfc         | platelet-derived growth factor, C polypeptide                            | NM_019971 | 7.7538  | 3.6452 | 4.1086 |
| 1460238_at   | Msln          | mesothelin                                                               | NM_018857 | 8.5598  | 4.4597 | 4.1002 |
| 1434115_at   | Cdh13         | cadherin 13                                                              | BQ176681  | 9.0210  | 4.9208 | 4.1002 |
| 1447819_x_at | Col8a1        | collagen, type VIII, alpha 1                                             | BB546487  | 10.3368 | 6.2582 | 4.0786 |
| 1422705_at   | Pmepa1        | prostate transmembrane protein, androgen induced 1                       | AV370981  | 8.7788  | 4.7004 | 4.0784 |
| 1436590_at   | Ppp1r3b       | protein phosphatase 1, regulatory (inhibitor) subunit 3B                 | BG071940  | 7.5840  | 3.5127 | 4.0713 |
| 1434092_at   | Atg9b         | autophagy related 9B                                                     | AW121498  | 8.7241  | 4.6674 | 4.0566 |
| 1449424_at   | Plek2         | pleckstrin 2                                                             | NM_013738 | 6.8805  | 2.8318 | 4.0487 |
| 1456683_at   | Sltm          | SAFB-like, transcription modulator                                       | BM200011  | 9.5511  | 5.5301 | 4.0210 |
| 1435493_at   | Dsp           | desmoplakin                                                              | AV297961  | 7.0967  | 3.0872 | 4.0095 |
| 1424588_at   | Srgap3        | SLIT-ROBO Rho GTPase activating protein 3                                | AF481964  | 8.0985  | 4.0988 | 3.9997 |
| 1427450_x_at | Myo1b         | myosin IB                                                                | BI080370  | 9.3596  | 5.3630 | 3.9966 |
| 1435494_s_at | Dsp           | desmoplakin                                                              | AV297961  | 6.7038  | 2.7149 | 3.9889 |
| 1421840_at   | Abca1         | ATP-binding cassette, sub-family A (ABC1), member 1                      | BB144704  | 8.3816  | 4.4063 | 3.9753 |
| 1450928_at   | Id4           | inhibitor of DNA binding 4                                               | BB121406  | 7.3461  | 3.3762 | 3.9699 |
| 1453771_at   | Gulp1         | GULP, engulfment adaptor PTB domain containing 1                         | BF144687  | 7.3768  | 3.4256 | 3.9512 |
| 1422760_at   | Padi4         | peptidyl arginine deiminase, type IV                                     | NM_011061 | 7.7356  | 3.7880 | 3.9476 |
| 1435374_at   | Cdyl2         | chromodomain protein, Y chromosome-like 2                                | BG071670  | 7.4584  | 3.5127 | 3.9457 |
| 1452166_a_at | Krt10         | keratin 10                                                               | AK014360  | 8.2410  | 4.2966 | 3.9444 |
| 1447693_s_at | Neo1          | neogenin                                                                 | BB350308  | 9.2100  | 5.2685 | 3.9415 |
| 1428406_s_at | Hcfc1r1       | host cell factor C1 regulator 1 (XPO1-dependent)                         | BF580567  | 10.9687 | 7.0284 | 3.9403 |
| 1428647_at   | Pbx1          | pre B cell leukemia homeobox 1                                           | BG070361  | 10.3625 | 6.4242 | 3.9384 |
| 1452092_at   | Chst15        | carbohydrate (N-acetylgalactosamine 4-sulfate 6-O) sulfotransferase 15   | AK019474  | 7.5173  | 3.5815 | 3.9359 |
| 1454737_at   | Dusp9         | dual specificity phosphatase 9                                           | AV295798  | 7.5774  | 3.6487 | 3.9288 |
| 1433643_at   | Cacna2d1      | calcium channel, voltage-dependent, alpha2/delta subunit 1               | BI106777  | 7.6523  | 3.7276 | 3.9247 |
| 1422139_at   | Plau          | plasminogen activator, urokinase                                         | NM_008873 | 7.2317  | 3.3086 | 3.9232 |
| 1458655_at   |               |                                                                          | AU018221  | 8.8359  | 4.9195 | 3.9164 |
| 1423551_at   | Cdh13         | cadherin 13                                                              | BB776961  | 8.3759  | 4.4597 | 3.9163 |
| 1424951_at   | Baiap2l1      | BAI1-associated protein 2-like 1                                         | BC015459  | 8.0455  | 4.1329 | 3.9126 |
| 1448468_a_at | Kcnab1        | potassium voltage-gated channel, shaker-related subfamily, beta member 1 | AF033003  | 8.6837  | 4.7725 | 3.9112 |
| 1437466_at   | Alcam         | activated leukocyte cell adhesion molecule                               | AV315205  | 8.4671  | 4.5566 | 3.9105 |
| 1419758_at   | Abcb1a        | ATP-binding cassette, sub-family B (MDR/TAP), member 1A                  | M30697    | 6.3573  | 2.4513 | 3.9061 |
| 1437481_at   | Trmt61b       | tRNA methyltransferase 61 homolog B (S. cerevisiae)                      | AV032349  | 7.4140  | 3.5127 | 3.9013 |
| 1424208_at   | Ptger4        | prostaglandin E receptor 4 (subtype EP4)                                 | BC011193  | 8.2997  | 4.3997 | 3.9000 |
| 1453139_at   | Nudt12        | nudix (nucleoside diphosphate linked moiety X)-type motif 12             | AK018117  | 6.4959  | 2.5992 | 3.8967 |
| 1425918_at   |               |                                                                          | BC022961  | 8.7681  | 4.8719 | 3.8962 |
| 1417481_at   | Ramp1         | receptor (calcitonin) activity modifying protein 1                       | NM_016894 | 8.9065  | 5.0107 | 3.8958 |
| 1428629_at   | Zfp518a       | zinc finger protein 518A                                                 | AK018187  | 6.2943  | 2.4021 | 3.8923 |
| 1436100_at   | Sh2d5         | SH2 domain containing 5                                                  | AV347995  | 7.3168  | 3.4245 | 3.8922 |
| 1447774_x_at | 5730469M10Rik | RIKEN cDNA 5730469M10 gene                                               | AV332575  | 8.9817  | 5.0970 | 3.8847 |
| 1448870_at   | Ltbp1         | latent transforming growth factor beta binding protein 1                 | AF022889  | 9.9486  | 6.0777 | 3.8708 |
| 1457032_at   | Ak5           | adenylate kinase 5                                                       | BB546359  | 8.5845  | 4.7249 | 3.8596 |
| 1447551_x_at | Lphn3         | latrophilin 3                                                            | BB274232  | 7.2275  | 3.3774 | 3.8500 |
| 1418736_at   | B3galnt1      | UDP-GalNAc:betaGlcNAc beta 1,3-galactosaminyltransferase, polypeptide 1  | BC003835  | 6.6810  | 2.8350 | 3.8460 |
| 1448950_at   | Il1r1         | interleukin 1 receptor, type I                                           | NM_008362 | 8.6155  | 4.7725 | 3.8430 |
| 1443745_s_at | Dmp1          | dentin matrix protein 1                                                  | AV020965  | 6.3376  | 2.5057 | 3.8319 |
| 1418572_x_at | Tnfrsf12a     | tumor necrosis factor receptor superfamily, member 12a                   | NM_013749 | 12.3127 | 8.5255 | 3.7872 |
| 1452253_at   | Crim1         | cysteine rich transmembrane BMP regulator 1 (chordin like)               | AK018666  | 6.3302  | 2.5612 | 3.7690 |

|              |               |                                                               |           |         |        |        |
|--------------|---------------|---------------------------------------------------------------|-----------|---------|--------|--------|
| 1448989_a_at | Myo1b         | myosin IB                                                     | AI255256  | 9.5715  | 5.8212 | 3.7503 |
| 1447839_x_at | Adm           | adrenomedullin                                                | AV378441  | 9.7676  | 6.0270 | 3.7406 |
| 1450414_at   | Pdgfb         | platelet derived growth factor, B polypeptide                 | BC023427  | 8.1311  | 4.3997 | 3.7314 |
| 1423304_a_at | Rnf111        | ring finger 111                                               | BB366842  | 12.4996 | 8.7722 | 3.7274 |
| 1436512_at   | Arl4c         | ADP-ribosylation factor-like 4C                               | BI964400  | 9.8228  | 6.0989 | 3.7239 |
| 1426649_at   |               |                                                               | BM114154  | 8.2794  | 4.5566 | 3.7228 |
| 1451270_at   | Dusp18        | dual specificity phosphatase 18                               | BC020036  | 8.8105  | 5.0970 | 3.7135 |
| 1428405_at   | Hcfc1r1       | host cell factor C1 regulator 1 (XPO1-dependent)              | BF580567  | 12.2775 | 8.5723 | 3.7052 |
| 1417732_at   | Anxa8         | annexin A8                                                    | NM_013473 | 7.9881  | 4.2876 | 3.7005 |
| 1416855_at   | Gas1          | growth arrest specific 1                                      | BB550400  | 9.3956  | 5.6970 | 3.6987 |
| 1437218_at   | Fn1           | fibronectin 1                                                 | BM234360  | 6.6564  | 2.9592 | 3.6973 |
| 1435541_at   | Btc           | betacellulin, epidermal growth factor family member           | AV231340  | 8.5244  | 4.8274 | 3.6970 |
| 1427357_at   | Cda           | cytidine deaminase                                            | AK008793  | 10.0017 | 6.3063 | 3.6954 |
| 1434036_at   | Mtss1         | metastasis suppressor 1                                       | AV024771  | 9.7497  | 6.0634 | 3.6863 |
| 1451827_a_at | Nox4          | NADPH oxidase 4                                               | BC021378  | 6.8354  | 3.1525 | 3.6829 |
| 1460406_at   | Pls1          | plastin 1 (I-isoform)                                         | BC026410  | 8.4021  | 4.7207 | 3.6814 |
| 1460302_at   | Thbs1         | thrombospondin 1                                              | AI385532  | 7.7776  | 4.1112 | 3.6664 |
| 1416892_s_at | Fam107b       | family with sequence similarity 107, member B                 | BC021353  | 11.1006 | 7.4343 | 3.6663 |
| 1427671_a_at | Fmn1          | formin 1                                                      | X62379    | 8.5770  | 4.9136 | 3.6633 |
| 1418571_at   | Tnfrsf12a     | tumor necrosis factor receptor superfamily, member 12a        | NM_013749 | 12.4095 | 8.7545 | 3.6550 |
| 1449885_at   | Tmem47        | transmembrane protein 47                                      | NM_138751 | 6.7422  | 3.0872 | 3.6550 |
| 1458151_at   | 4833444G19Rik | RIKEN cDNA 4833444G19 gene                                    | AV253033  | 7.3026  | 3.6503 | 3.6523 |
| 1434112_at   | Lphn2         | latrophilin 2                                                 | BG966339  | 6.7377  | 3.0886 | 3.6491 |
| 1434931_at   | Neo1          | neogenin                                                      | BB667778  | 9.5082  | 5.8632 | 3.6450 |
| 1422541_at   | Ptprm         | protein tyrosine phosphatase, receptor type, M                | NM_008984 | 7.5460  | 3.9024 | 3.6435 |
| 1448467_a_at | Ehbp111       | EH domain binding protein 1-like 1                            | NM_053252 | 8.2848  | 4.6448 | 3.6400 |
| 1424704_at   | Runx2         | runt related transcription factor 2                           | D14636    | 10.1042 | 6.4723 | 3.6319 |
| 1436329_at   | Egr3          | early growth response 3                                       | AV346607  | 8.2266  | 4.5968 | 3.6299 |
| 1448594_at   | Wisp1         | WNT1 inducible signaling pathway protein 1                    | NM_018865 | 6.7797  | 3.1525 | 3.6272 |
| 1432410_a_at | Bmp7          | bone morphogenetic protein 7                                  | AK020411  | 6.8118  | 3.1972 | 3.6145 |
| 1435977_at   | Hdgfrp3       | hepatoma-derived growth factor, related protein 3             | BM240385  | 6.9213  | 3.3086 | 3.6128 |
| 1434470_at   | Syt13         | synaptotagmin XIII                                            | BB244585  | 7.7805  | 4.1689 | 3.6116 |
| 1420401_a_at | Ramp3         | receptor (calcitonin) activity modifying protein 3            | NM_019511 | 8.5290  | 4.9195 | 3.6096 |
| 1460431_at   | Gcnt1         | glucosaminyl (N-acetyl) transferase 1, core 2                 | AK017462  | 6.8057  | 3.1972 | 3.6085 |
| 1460378_a_at | Tes           | testis derived transcript                                     | BC010465  | 11.2309 | 7.6248 | 3.6062 |
| 1417872_at   | Fhl1          | four and a half LIM domains 1                                 | U41739    | 7.2549  | 3.6503 | 3.6046 |
| 1416043_at   | Nasp          | nuclear autoantigenic sperm protein (histone-binding)         | BB493242  | 7.2488  | 3.6503 | 3.5984 |
| 1456258_at   | Emx2          | empty spiracles homeobox 2                                    | BG072869  | 6.6847  | 3.0872 | 3.5975 |
| 1450389_s_at | Pip5k1b       | phosphatidylinositol-4-phosphate 5-kinase, type 1 beta        | NM_008846 | 6.8531  | 3.2638 | 3.5893 |
| 1427028_at   | Lgr6          | leucine-rich repeat-containing G protein-coupled receptor 6   | BB516297  | 8.1440  | 4.5566 | 3.5874 |
| 1437467_at   | Alcam         | activated leukocyte cell adhesion molecule                    | AV315205  | 9.2464  | 5.6689 | 3.5776 |
| 1437259_at   | Slc9a2        | solute carrier family 9 (sodium/hydrogen exchanger), member 2 | AV274006  | 6.6560  | 3.0872 | 3.5689 |
| 1452320_at   | Lrp2          | low density lipoprotein receptor-related protein 2            | C80829    | 6.9332  | 3.3700 | 3.5632 |
| 1433845_x_at | Dusp9         | dual specificity phosphatase 9                                | AV295798  | 7.3506  | 3.7880 | 3.5626 |
| 1449210_at   | Igf2bp1       | insulin-like growth factor 2 mRNA binding protein 1           | BB499476  | 7.8572  | 4.2966 | 3.5606 |
| 1455642_a_at | Tspan17       | tetraspanin 17                                                | AI844703  | 7.3417  | 3.7880 | 3.5537 |
| 1449491_at   | Card10        | caspase recruitment domain family, member 10                  | NM_130859 | 9.8207  | 6.2745 | 3.5462 |
| 1418025_at   | Bhlhe40       | basic helix-loop-helix family, member e40                     | NM_011498 | 11.2314 | 7.6856 | 3.5458 |
| 1439397_at   | Fmn1          | formin 1                                                      | BB164513  | 8.2204  | 4.6814 | 3.5390 |
| 1426301_at   | Alcam         | activated leukocyte cell adhesion molecule                    | U95030    | 9.8881  | 6.3554 | 3.5327 |
| 1418946_at   | St3gal1       | ST3 beta-galactoside alpha-2,3-sialyltransferase 1            | NM_009177 | 6.8912  | 3.3736 | 3.5176 |
| 1448823_at   | Cxcl12        | chemokine (C-X-C motif) ligand 12                             | BC006640  | 7.2258  | 3.7151 | 3.5107 |
| 1433465_a_at | AI467606      | expressed sequence AI467606                                   | BB234337  | 8.4744  | 4.9657 | 3.5087 |
| 1451046_at   | Zfpn1         | zinc finger protein, multitype 1                              | AA014267  | 8.3600  | 4.8558 | 3.5041 |
| 1434341_x_at | Uqcr10        | ubiquinol-cytochrome c reductase, complex III subunit X       | BF681728  | 9.1834  | 5.6799 | 3.5035 |

|              |               |                                                                                        |           |         |        |        |
|--------------|---------------|----------------------------------------------------------------------------------------|-----------|---------|--------|--------|
| 1420417_at   | Sema3a        | sema domain, immunoglobulin domain (Ig), short basic domain, secreted, (semaphorin) 3A | NM_009152 | 6.9296  | 3.4443 | 3.4854 |
| 1422672_at   | Sprr1b        | small proline-rich protein 1B                                                          | NM_009265 | 5.9869  | 2.5057 | 3.4812 |
| 1438405_at   | Fgf7          | fibroblast growth factor 7                                                             | BB791906  | 9.0542  | 5.5775 | 3.4767 |
| 1456874_at   | Flrt2         | fibronectin leucine rich transmembrane protein 2                                       | BB817332  | 7.0755  | 3.6073 | 3.4682 |
| 1455197_at   | Rnd1          | Rho family GTPase 1                                                                    | BE852181  | 8.8070  | 5.3414 | 3.4656 |
| 1438702_at   | Flrt2         | fibronectin leucine rich transmembrane protein 2                                       | BG075699  | 8.3989  | 4.9335 | 3.4654 |
| 1417818_at   | Wwtr1         | WW domain containing transcription regulator 1                                         | BC014727  | 13.2271 | 9.7702 | 3.4570 |
| 1434423_at   | Gulp1         | GULP, engulfment adaptor PTB domain containing 1                                       | BB138485  | 6.1701  | 2.7149 | 3.4552 |
| 1442223_at   | Enah          | enabled homolog (Drosophila)                                                           | AV329519  | 6.4769  | 3.0227 | 3.4542 |
| 1435645_at   | Mmd           | monocyte to macrophage differentiation-associated                                      | AA472735  | 8.2615  | 4.8229 | 3.4386 |
| 1448509_at   | Fam107b       | family with sequence similarity 107, member B                                          | BC021353  | 9.1069  | 5.6689 | 3.4380 |
| 1427321_s_at | Cxadr         | coxsackie virus and adenovirus receptor                                                | AK004908  | 7.3530  | 3.9153 | 3.4376 |
| 1438936_s_at |               |                                                                                        | AI385586  | 7.9320  | 4.4990 | 3.4330 |
| 1427673_a_at | Sema3e        | sema domain, immunoglobulin domain (Ig), short basic domain, secreted, (semaphorin) 3E | Z93948    | 7.1487  | 3.7192 | 3.4295 |
| 1455340_at   | Dennd5b       | DENN/MADD domain containing 5B                                                         | BB763709  | 8.0964  | 4.6674 | 3.4289 |
| 1460550_at   | Mtmr11        | myotubularin related protein 11                                                        | BE952757  | 8.2925  | 4.8648 | 3.4277 |
| 1424246_a_at | Tes           | testis derived transcript                                                              | BC003808  | 11.5986 | 8.1710 | 3.4276 |
| 1448411_at   | Wfs1          | Wolfram syndrome 1 homolog (human)                                                     | NM_011716 | 8.0401  | 4.6127 | 3.4273 |
| 1449450_at   | Ptges         | prostaglandin E synthase                                                               | NM_022415 | 8.2218  | 4.8042 | 3.4176 |
| 1457035_at   | AI607873      | expressed sequence AI607873                                                            | AI607873  | 5.8154  | 2.3979 | 3.4175 |
| 1458060_at   | Ldlrap1       | low density lipoprotein receptor adaptor protein 1                                     | BB794855  | 8.6841  | 5.2685 | 3.4156 |
| 1455225_at   | Syne1         | synaptic nuclear envelope 1                                                            | AV237615  | 6.8816  | 3.4662 | 3.4154 |
| 1437199_at   | Dusp5         | dual specificity phosphatase 5                                                         | BB442784  | 9.3935  | 5.9820 | 3.4114 |
| 1426926_at   | Plcg2         | phospholipase C, gamma 2                                                               | AW546508  | 9.4093  | 6.0024 | 3.4070 |
| 1428636_at   | Steap2        | six transmembrane epithelial antigen of prostate 2                                     | AK015015  | 10.7211 | 7.3218 | 3.3994 |
| 1442363_at   | 1110012J17Rik | RIKEN cDNA 1110012J17 gene                                                             | BB461471  | 9.0959  | 5.6970 | 3.3990 |
| 1449670_x_at | Gpr137b       | G protein-coupled receptor 137B                                                        | AW546472  | 6.5429  | 3.1525 | 3.3904 |
| 1455160_at   | 2610203C20Rik | RIKEN cDNA 2610203C20 gene                                                             | BM220421  | 10.3218 | 6.9332 | 3.3886 |
| 1453607_at   | Mfap3l        | microfibrillar-associated protein 3-like                                               | AV280494  | 6.2232  | 2.8350 | 3.3882 |
| 1418673_at   | Snai2         | snail homolog 2 (Drosophila)                                                           | NM_011415 | 7.4828  | 4.1035 | 3.3793 |
| 1449623_at   | Txnrd3        | thioredoxin reductase 3                                                                | AI196535  | 8.2940  | 4.9195 | 3.3746 |
| 1451119_a_at | Fbln1         | fibulin 1                                                                              | BC007140  | 7.7295  | 4.3588 | 3.3707 |
| 1428377_at   | Btbd11        | BTB (POZ) domain containing 11                                                         | AK018115  | 7.3405  | 3.9701 | 3.3704 |
| 1448812_at   | Hpcal1        | hippocalcin-like 1                                                                     | NM_016677 | 11.0298 | 7.6668 | 3.3630 |
| 1457823_at   | Cyr61         | cysteine rich protein 61                                                               | BB533736  | 11.7284 | 8.3687 | 3.3598 |
| 1459838_s_at | Btbd11        | BTB (POZ) domain containing 11                                                         | BB230894  | 8.3184  | 4.9657 | 3.3526 |
| 1436970_a_at | Pdgfrb        | platelet derived growth factor receptor, beta polypeptide                              | AA499047  | 8.9244  | 5.5812 | 3.3432 |
| 1440245_at   | Ccdc88b       | coiled-coil domain containing 88B                                                      | AW208904  | 8.0632  | 4.7207 | 3.3425 |
| 1440633_at   | Neil3         | nei like 3 (E. coli)                                                                   | AV316939  | 7.0380  | 3.7071 | 3.3310 |
| 1424801_at   | Enah          | enabled homolog (Drosophila)                                                           | BQ044016  | 8.2023  | 4.8719 | 3.3305 |
| 1416041_at   | Sgk1          | serum/glucocorticoid regulated kinase 1                                                | NM_011361 | 10.8646 | 7.5356 | 3.3290 |
| 1448640_at   | Slc14a1       | solute carrier family 14 (urea transporter), member 1                                  | NM_028122 | 6.1198  | 2.7910 | 3.3288 |
| 1422836_at   | Mbnl3         | muscleblind-like 3 (Drosophila)                                                        | NM_134163 | 6.4791  | 3.1525 | 3.3266 |
| 1443746_x_at | Dmp1          | dentin matrix protein 1                                                                | AV020965  | 5.9820  | 2.6565 | 3.3255 |
| 1436841_at   | Fam63b        | family with sequence similarity 63, member B                                           | AV229336  | 12.7858 | 9.4612 | 3.3245 |
| 1422864_at   | Runx1         | runt related transcription factor 1                                                    | NM_009821 | 8.3304  | 5.0107 | 3.3196 |
| 1430221_at   | 9130008F23Rik | RIKEN cDNA 9130008F23 gene                                                             | BB763680  | 7.4935  | 4.1759 | 3.3176 |
| 1438773_at   | Steap2        | six transmembrane epithelial antigen of prostate 2                                     | BB817972  | 8.9864  | 5.6689 | 3.3175 |
| 1454862_at   | Phldb2        | pleckstrin homology-like domain, family B, member 2                                    | AV253284  | 9.5734  | 6.2582 | 3.3152 |
| 1436842_at   | Fam63b        | family with sequence similarity 63, member B                                           | AV229336  | 12.7253 | 9.4151 | 3.3102 |
| 1454983_at   | Fam63b        | family with sequence similarity 63, member B                                           | BG094392  | 11.4319 | 8.1217 | 3.3101 |
| 1419613_at   | Col7a1        | collagen, type VII, alpha 1                                                            | NM_007738 | 9.5370  | 6.2338 | 3.3032 |
| 1423278_at   | Ptprk         | protein tyrosine phosphatase, receptor type, K                                         | AI893646  | 7.4014  | 4.1035 | 3.2980 |
| 1437270_a_at | Clcf1         | cardiotrophin-like cytokine factor 1                                                   | BB825816  | 8.3497  | 5.0544 | 3.2953 |
| 1458268_s_at | Igfbp3        | insulin-like growth factor binding protein 3                                           | AI649005  | 6.0047  | 2.7149 | 3.2898 |
| 1426818_at   | Arrdc4        | arrestin domain containing 4                                                           | BC025091  | 7.2562  | 3.9701 | 3.2861 |

|              |               |                                                                                        |           |         |        |        |
|--------------|---------------|----------------------------------------------------------------------------------------|-----------|---------|--------|--------|
| 1440668_at   | Adamtsl3      | ADAMTS-like 3                                                                          | BM235389  | 6.9357  | 3.6503 | 3.2854 |
| 1424008_a_at | Rbpms2        | RNA binding protein with multiple splicing 2                                           | BC021788  | 10.6610 | 7.3790 | 3.2820 |
| 1417373_a_at | Tuba4a        | tubulin, alpha 4A                                                                      | AW491660  | 11.8758 | 8.5970 | 3.2788 |
| 1426930_at   | Celf4         | CUGBP, Elav-like family member 4                                                       | AV327653  | 9.8210  | 6.5446 | 3.2765 |
| 1442590_at   |               |                                                                                        | BB366863  | 9.0959  | 5.8212 | 3.2747 |
| 1429273_at   | Bmper         | BMP-binding endothelial regulator                                                      | AK014221  | 6.6421  | 3.3762 | 3.2659 |
| 1422852_at   | Cib2          | calcium and integrin binding family member 2                                           | NM_019686 | 7.3681  | 4.1035 | 3.2647 |
| 1440451_at   | D730048J04Rik | RIKEN cDNA D730048J04 gene                                                             | BG085035  | 6.7079  | 3.4443 | 3.2637 |
| 1416749_at   | Htra1         | HtrA serine peptidase 1                                                                | NM_019564 | 11.2786 | 8.0217 | 3.2569 |
| 1451469_at   | Cntln         | centlein, centrosomal protein                                                          | BC027370  | 7.3506  | 4.0943 | 3.2563 |
| 1439747_at   | Ptges         | prostaglandin E synthase                                                               | BB730139  | 8.4191  | 5.1653 | 3.2538 |
| 1445758_at   |               |                                                                                        | BG076276  | 8.3078  | 5.0544 | 3.2533 |
| 1438937_x_at |               |                                                                                        | AI385586  | 6.6275  | 3.3762 | 3.2514 |
| 1444422_at   | Pcdh19        | protocadherin 19                                                                       | BB732600  | 6.1457  | 2.8966 | 3.2492 |
| 1448485_at   | Ggt1          | gamma-glutamyltransferase 1                                                            | NM_008116 | 7.5419  | 4.2966 | 3.2453 |
| 1418936_at   | Maff          | v-maf musculoaponeurotic fibrosarcoma oncogene family, protein F (avian)               | BC022952  | 10.3727 | 7.1280 | 3.2447 |
| 1453152_at   | Mamdc2        | MAM domain containing 2                                                                | AK004794  | 6.2033  | 2.9592 | 3.2441 |
| 1448029_at   | Tbx3          | T-box 3                                                                                | AA543734  | 6.8246  | 3.5815 | 3.2431 |
| 1437479_x_at | Tbx3          | T-box 3                                                                                | BB728182  | 6.1344  | 2.8931 | 3.2413 |
| 1442340_x_at | Cyr61         | cysteine rich protein 61                                                               | BB533736  | 11.6675 | 8.4280 | 3.2395 |
| 1450881_s_at |               |                                                                                        | AK010724  | 9.0404  | 5.8041 | 3.2363 |
| 1438602_s_at | Masp1         | mannan-binding lectin serine peptidase 1                                               | BB732340  | 8.4295  | 5.1971 | 3.2324 |
| 1434278_at   | Mtm1          | X-linked myotubular myopathy gene 1                                                    | BG976607  | 10.1097 | 6.8774 | 3.2322 |
| 1423277_at   | Ptprk         | protein tyrosine phosphatase, receptor type, K                                         | AI893646  | 7.8900  | 4.6674 | 3.2226 |
| 1452291_at   | Arap2         | ArfGAP with RhoGAP domain, ankyrin repeat and PH domain 2                              | AV375176  | 9.5223  | 6.3015 | 3.2208 |
| 1452304_a_at | Arhgef5       | Rho guanine nucleotide exchange factor (GEF) 5                                         | BC025127  | 7.7194  | 4.4990 | 3.2204 |
| 1432198_at   | Prune2        | prune homolog 2 (Drosophila)                                                           | AK018172  | 8.3378  | 5.1321 | 3.2057 |
| 1439758_at   | Als2cr12      | amyotrophic lateral sclerosis 2 (juvenile) chromosome region, candidate 12 (human)     | BF318690  | 6.5688  | 3.3709 | 3.1979 |
| 1451871_a_at | Ghr           | growth hormone receptor                                                                | M33324    | 7.1516  | 3.9701 | 3.1815 |
| 1437268_at   | Lancl3        | LanC lantibiotic synthetase component C-like 3 (bacterial)                             | BB811311  | 5.9619  | 2.7822 | 3.1798 |
| 1415935_at   | Smoc2         | SPARC related modular calcium binding 2                                                | NM_022315 | 6.9661  | 3.7880 | 3.1781 |
| 1418752_at   | Aldh3a1       | aldehyde dehydrogenase family 3, subfamily A1                                          | NM_007436 | 8.2709  | 5.0970 | 3.1739 |
| 1425906_a_at | Sema3e        | sema domain, immunoglobulin domain (Ig), short basic domain, secreted, (semaphorin) 3E | AF034744  | 6.7217  | 3.5479 | 3.1737 |
| 1429053_at   | 1110012J17Rik | RIKEN cDNA 1110012J17 gene                                                             | BB795266  | 7.9966  | 4.8229 | 3.1737 |
| 1452716_at   | 5730469M10Rik | RIKEN cDNA 5730469M10 gene                                                             | AK017688  | 10.9728 | 7.8022 | 3.1705 |
| 1451744_a_at | Ptgr2         | prostaglandin reductase 2                                                              | BC021466  | 6.4790  | 3.3086 | 3.1705 |
| 1425985_s_at | Masp1         | mannan-binding lectin serine peptidase 1                                               | AB049755  | 8.4758  | 5.3054 | 3.1704 |
| 1422344_s_at | Tnfrsf10b     | tumor necrosis factor receptor superfamily, member 10b                                 | NM_020294 | 7.1485  | 3.9862 | 3.1623 |
| 1419126_at   | Hoxd9         | homeobox D9                                                                            | BC019150  | 8.3541  | 5.1918 | 3.1623 |
| 1417821_at   | D17H6S56E-5   | DNA segment, Chr 17, human D6S56E 5                                                    | NM_033075 | 11.3143 | 8.1609 | 3.1534 |
| 1427403_at   | Slco1a5       | solute carrier organic anion transporter family, member 1a5                            | BC004814  | 6.5913  | 3.4443 | 3.1471 |
| 1440085_at   | Eda2r         | ectodysplasin A2 receptor                                                              | AV246296  | 6.9332  | 3.7880 | 3.1452 |
| 1424303_at   | Depdc7        | DEP domain containing 7                                                                | BC013499  | 6.8523  | 3.7086 | 3.1437 |
| 1423104_at   | Irs1          | insulin receptor substrate 1                                                           | BB345784  | 11.8129 | 8.6761 | 3.1368 |
| 1429693_at   | Dab2          | disabled 2, mitogen-responsive phosphoprotein                                          | AK017619  | 7.1687  | 4.0372 | 3.1315 |
| 1439036_a_at | Atp1b1        | ATPase, Na <sup>+</sup> /K <sup>+</sup> transporting, beta 1 polypeptide               | AV152334  | 5.9044  | 2.7744 | 3.1300 |
| 1455158_at   | Itga3         | integrin alpha 3                                                                       | BI664675  | 8.6041  | 5.4771 | 3.1270 |
| 1452645_x_at |               |                                                                                        | AF419250  | 5.8414  | 2.7149 | 3.1265 |
| 1453851_a_at | Gadd45g       | growth arrest and DNA-damage-inducible 45 gamma                                        | AK007410  | 9.7476  | 6.6212 | 3.1264 |
| 1451074_at   | Rnf13         | ring finger protein 13                                                                 | AF037205  | 12.5416 | 9.4211 | 3.1205 |
| 1442359_at   | Steap2        | six transmembrane epithelial antigen of prostate 2                                     | BE995447  | 9.6798  | 6.5730 | 3.1068 |
| 1436839_at   | 2010109K11Rik | RIKEN cDNA 2010109K11 gene                                                             | BB174749  | 6.4784  | 3.3794 | 3.0989 |
| 1458007_at   |               |                                                                                        | BG066725  | 6.5925  | 3.4987 | 3.0938 |
| 1438855_x_at | Tnfaip2       | tumor necrosis factor, alpha-induced protein 2                                         | BB233088  | 11.2278 | 8.1379 | 3.0899 |
| 1436030_at   | Cachd1        | cache domain containing 1                                                              | BB730977  | 7.5664  | 4.4803 | 3.0860 |



|              |          |                                                                        |           |         |        |        |
|--------------|----------|------------------------------------------------------------------------|-----------|---------|--------|--------|
| 1427484_at   | Emi5     | echinoderm microtubule associated protein like 5                       | BB650819  | 8.0857  | 5.0021 | 3.0836 |
| 1451539_at   | Baiap2l1 | BAI1-associated protein 2-like 1                                       | BC015459  | 7.0513  | 3.9701 | 3.0812 |
| 1433769_at   | Als2cl   | ALS2 C-terminal like                                                   | BM201174  | 7.9021  | 4.8229 | 3.0792 |
| 1423260_at   | Id4      | inhibitor of DNA binding 4                                             | BB121406  | 7.4935  | 4.4154 | 3.0782 |
| 1454974_at   | Ntn1     | netrin 1                                                               | BI143915  | 7.7451  | 4.6674 | 3.0777 |
| 1435337_at   | Tshz3    | teashirt zinc finger family member 3                                   | BB150458  | 6.4791  | 3.4144 | 3.0647 |
| 1417837_at   | Phlda2   | pleckstrin homology-like domain, family A, member 2                    | NM_009434 | 9.3831  | 6.3197 | 3.0634 |
| 1434109_at   | Sh3bgrl2 | SH3 domain binding glutamic acid-rich protein like 2                   | AV291265  | 8.4026  | 5.3414 | 3.0612 |
| 1419761_a_at | Gabpb1   | GA repeat binding protein, beta 1                                      | NM_010249 | 9.5486  | 6.5011 | 3.0475 |
| 1423513_at   |          |                                                                        | BG141609  | 9.0065  | 5.9590 | 3.0474 |
| 1419759_at   | Abcb1a   | ATP-binding cassette, sub-family B (MDR/TAP), member 1A                | M30697    | 6.0687  | 3.0227 | 3.0460 |
| 1452106_at   | Npnt     | nephronectin                                                           | AA223007  | 6.1327  | 3.0872 | 3.0455 |
| 1422865_at   | Runx1    | runt related transcription factor 1                                    | NM_009821 | 6.7621  | 3.7192 | 3.0429 |
| 1437385_at   | Ccbe1    | collagen and calcium binding EGF domains 1                             | AV264768  | 6.4337  | 3.3967 | 3.0370 |
| 1457020_at   |          |                                                                        | BB534501  | 6.7665  | 3.7299 | 3.0366 |
| 1429871_at   | Hmmr     | hyaluronan mediated motility receptor (RHAMM)                          | AK020144  | 6.6941  | 3.6583 | 3.0358 |
| 1421161_at   | Btc      | betacellulin, epidermal growth factor family member                    | NM_007568 | 5.8149  | 2.7834 | 3.0315 |
| 1417995_at   | Ptpn22   | protein tyrosine phosphatase, non-receptor type 22 (lymphoid)          | NM_008979 | 5.8665  | 2.8350 | 3.0315 |
| 1452240_at   | Celf4    | CUGBP, Elav-like family member 4                                       | AV327653  | 9.4105  | 6.3811 | 3.0294 |
| 1425622_at   | Edil3    | EGF-like repeats and discoidin I-like domains 3                        | AF031524  | 6.3376  | 3.3086 | 3.0291 |
| 1452203_at   | Nabp1    | nucleic acid binding protein 1                                         | AV313559  | 9.1185  | 6.0989 | 3.0196 |
| 1423868_at   | Txnrd3   | thioredoxin reductase 3                                                | AF349659  | 7.3768  | 4.3588 | 3.0181 |
| 1443178_at   | Rnf13    | ring finger protein 13                                                 | BB384408  | 6.9835  | 3.9701 | 3.0134 |
| 1450723_at   | Isl1     | ISL1 transcription factor, LIM/homeodomain                             | BQ176915  | 7.9312  | 4.9195 | 3.0117 |
| 1418421_at   | Bcl6b    | B cell CLL/lymphoma 6, member B                                        | NM_007528 | 9.3411  | 6.3302 | 3.0109 |
| 1453351_at   | Tbx20    | T-box 20                                                               | AK020409  | 5.6631  | 2.6565 | 3.0066 |
| 1428197_at   | Tspan9   | tetraspanin 9                                                          | AK020159  | 9.9790  | 6.9758 | 3.0032 |
| 1452907_at   | Galc     | galactosylceramidase                                                   | AK010101  | 8.8070  | 5.8105 | 2.9964 |
| 1420499_at   | Gch1     | GTP cyclohydrolase 1                                                   | NM_008102 | 10.0289 | 7.0394 | 2.9895 |
| 1427975_at   | Rasl10a  | RAS-like, family 10, member A                                          | AK008807  | 7.2810  | 4.2966 | 2.9843 |
| 1454799_at   | Agpat9   | 1-acylglycerol-3-phosphate O-acyltransferase 9                         | AV300264  | 8.3253  | 5.3414 | 2.9839 |
| 1436317_at   | Pgap1    | post-GPI attachment to proteins 1                                      | BM115569  | 8.5126  | 5.5301 | 2.9825 |
| 1448656_at   | Cacnb3   | calcium channel, voltage-dependent, beta 3 subunit                     | NM_007581 | 8.9645  | 5.9936 | 2.9709 |
| 1423779_at   | Chchd6   | coiled-coil-helix-coiled-coil-helix domain containing 6                | BC011331  | 8.2747  | 5.3054 | 2.9693 |
| 1425383_a_at | Pbx1     | pre B cell leukemia homeobox 1                                         | L27453    | 7.8300  | 4.8719 | 2.9581 |
| 1417374_at   | Tuba4a   | tubulin, alpha 4A                                                      | AW491660  | 10.6208 | 7.6677 | 2.9531 |
| 1426514_at   | Chst15   | carbohydrate (N-acetylgalactosamine 4-sulfate 6-O) sulfotransferase 15 | AK019474  | 5.9092  | 2.9592 | 2.9501 |
| 1425789_s_at | Anxa8    | annexin A8                                                             | BC013271  | 7.8215  | 4.8719 | 2.9496 |
| 1428319_at   | Pdlim7   | PDZ and LIM domain 7                                                   | AK010339  | 9.4011  | 6.4574 | 2.9437 |
| 1436920_at   | Pcdh17   | protocadherin 17                                                       | BQ176938  | 9.3149  | 6.3729 | 2.9420 |
| 1429775_a_at |          |                                                                        | AK009736  | 8.8975  | 5.9590 | 2.9384 |
| 1416804_at   | Ehbp111  | EH domain binding protein 1-like 1                                     | NM_053252 | 7.0394  | 4.1040 | 2.9354 |
| 1436895_at   | Arap2    | ArfGAP with RhoGAP domain, ankyrin repeat and PH domain 2              | BB182934  | 7.1687  | 4.2333 | 2.9354 |
| 1424679_at   | Mab21l1  | mab-21-like 1 (C. elegans)                                             | AF228913  | 5.8297  | 2.8966 | 2.9332 |
| 1439015_at   | Gfra1    | glial cell line derived neurotrophic factor family receptor alpha 1    | AV221299  | 8.9363  | 6.0047 | 2.9316 |
| 1424854_at   |          |                                                                        | BC019757  | 6.9685  | 4.0372 | 2.9313 |
| 1425166_at   | Rbl1     | retinoblastoma-like 1 (p107)                                           | U27178    | 9.2288  | 6.2982 | 2.9307 |
| 1446071_at   | Steap2   | six transmembrane epithelial antigen of prostate 2                     | BB529332  | 7.5434  | 4.6127 | 2.9306 |
| 1416700_at   | Rnd3     | Rho family GTPase 3                                                    | BC009002  | 8.8914  | 5.9666 | 2.9248 |
| 1436538_at   | Ankrd37  | ankyrin repeat domain 37                                               | AV084342  | 8.9864  | 6.0634 | 2.9230 |
| 1441536_at   | Hmgcs1   | 3-hydroxy-3-methylglutaryl-Coenzyme A synthase 1                       | AV362707  | 6.8402  | 3.9190 | 2.9212 |
| 1452367_at   | Coro2a   | coronin, actin binding protein 2A                                      | AI316747  | 6.8186  | 3.8991 | 2.9195 |
| 1420653_at   | Tgfb1    | transforming growth factor, beta 1                                     | NM_011577 | 7.7845  | 4.8733 | 2.9112 |

|              |               |                                                                 |           |         |        |        |
|--------------|---------------|-----------------------------------------------------------------|-----------|---------|--------|--------|
| 1438251_x_at | Htra1         | HtrA serine peptidase 1                                         | BB559067  | 11.1967 | 8.2871 | 2.9096 |
| 1425741_at   | Srgap3        | SLIT-ROBO Rho GTPase activating protein 3                       | AF338472  | 6.2161  | 3.3086 | 2.9076 |
| 1434891_at   | Ptgfrn        | prostaglandin F2 receptor negative regulator                    | AV253087  | 10.2178 | 7.3208 | 2.8970 |
| 1440847_at   | Mtss1         | metastasis suppressor 1                                         | BB326749  | 6.1345  | 3.2388 | 2.8957 |
| 1416039_x_at | Cyr61         | cysteine rich protein 61                                        | NM_010516 | 11.6630 | 8.7678 | 2.8952 |
| 1453386_at   | Tusc1         | tumor suppressor candidate 1                                    | AK008612  | 6.3383  | 3.4443 | 2.8940 |
| 1439852_at   |               |                                                                 | BB036443  | 6.2005  | 3.3086 | 2.8919 |
| 1424339_at   | Oasl1         | 2'-5' oligoadenylate synthetase-like 1                          | AB067533  | 10.2912 | 7.3998 | 2.8914 |
| 1448529_at   | Thbd          | thrombomodulin                                                  | NM_009378 | 8.2662  | 5.3765 | 2.8897 |
| 1426864_a_at | Ncam1         | neural cell adhesion molecule 1                                 | BB698413  | 8.2986  | 5.4108 | 2.8878 |
| 1438824_at   | Slc20a1       | solute carrier family 20, member 1                              | BB465699  | 7.1820  | 4.2966 | 2.8853 |
| 1415977_at   | lsyna1        | myo-inositol 1-phosphate synthase A1                            | NM_023627 | 7.2436  | 4.3588 | 2.8848 |
| 1415803_at   | Cx3cl1        | chemokine (C-X3-C motif) ligand 1                               | AF010586  | 7.4693  | 4.5906 | 2.8787 |
| 1422179_at   | Gjb4          | gap junction protein, beta 4                                    | NM_008127 | 6.7163  | 3.8396 | 2.8766 |
| 1416715_at   | Gjb3          | gap junction protein, beta 3                                    | NM_008126 | 7.9861  | 5.1247 | 2.8614 |
| 1436042_at   | Tln1          | talin 1                                                         | BI648366  | 7.6524  | 4.7912 | 2.8612 |
| 1421624_a_at | Enah          | enabled homolog (Drosophila)                                    | NM_010135 | 6.4409  | 3.5815 | 2.8594 |
| 1423805_at   | Dab2          | disabled 2, mitogen-responsive phosphoprotein                   | BC006588  | 6.8406  | 3.9831 | 2.8574 |
| 1452413_at   | C230081A13Rik | RIKEN cDNA C230081A13 gene                                      | BC026466  | 7.7459  | 4.8897 | 2.8562 |
| 1434070_at   | Jag1          | jagged 1                                                        | AV359819  | 10.0669 | 7.2169 | 2.8500 |
| 1416830_at   | 0610031J06Rik | RIKEN cDNA 0610031J06 gene                                      | NM_020003 | 10.2935 | 7.4474 | 2.8461 |
| 1418123_at   | Unc119        | unc-119 homolog (C. elegans)                                    | BC001990  | 9.5086  | 6.6626 | 2.8460 |
| 1418097_a_at | Crif2         | cytokine receptor-like factor 2                                 | NM_016715 | 7.0708  | 4.2252 | 2.8456 |
| 1448013_at   | Usp24         | ubiquitin specific peptidase 24                                 | AI196993  | 8.6422  | 5.7966 | 2.8456 |
| 1434211_at   | Sh3bgrl2      | SH3 domain binding glutamic acid-rich protein like 2            | BB352548  | 7.5094  | 4.6674 | 2.8420 |
| 1424531_a_at | Tcea3         | transcription elongation factor A (SII), 3                      | BC010807  | 6.8767  | 4.0372 | 2.8395 |
| 1426642_at   | Fn1           | fibronectin 1                                                   | BC004724  | 11.4557 | 8.6216 | 2.8341 |
| 1435029_at   | B230120H23Rik | RIKEN cDNA B230120H23 gene                                      | BB454974  | 10.9397 | 8.1077 | 2.8320 |
| 1416273_at   | Tnfaip2       | tumor necrosis factor, alpha-induced protein 2                  | NM_009396 | 10.2489 | 7.4224 | 2.8265 |
| 1443694_at   | Rgs20         | regulator of G-protein signaling 20                             | BB794177  | 7.1796  | 4.3571 | 2.8225 |
| 1424133_at   | Tmem98        | transmembrane protein 98                                        | BC011208  | 6.9835  | 4.1689 | 2.8146 |
| 1428509_at   | Myo1e         | myosin IE                                                       | AK018649  | 10.8446 | 8.0304 | 2.8142 |
| 1437722_x_at | Pcbp3         | poly(rC) binding protein 3                                      | BB559884  | 6.8500  | 4.0372 | 2.8128 |
| 1423406_at   | Sv2a          | synaptic vesicle glycoprotein 2 a                               | BC026494  | 6.8057  | 3.9941 | 2.8117 |
| 1416893_at   | Fam107b       | family with sequence similarity 107, member B                   | BC021353  | 8.1166  | 5.3054 | 2.8112 |
| 1438160_x_at | Slco4a1       | solute carrier organic anion transporter family, member 4a1     | AV348121  | 6.9553  | 4.1468 | 2.8085 |
| 1453065_at   | Aldh5a1       | aldehyde dehydrogenase family 5, subfamily A1                   | BQ175320  | 7.3075  | 4.4990 | 2.8085 |
| 1423287_at   | Cbln1         | cerebellin 1 precursor protein                                  | AA016422  | 5.7515  | 2.9592 | 2.7924 |
| 1420682_at   | Chrn1         | cholinergic receptor, nicotinic, beta polypeptide 1 (muscle)    | M14537    | 6.3729  | 3.5815 | 2.7914 |
| 1417822_at   | D17H6S56E-5   | DNA segment, Chr 17, human D6S56E 5                             | NM_033075 | 11.6723 | 8.8812 | 2.7911 |
| 1445463_at   | Npepps        | aminopeptidase puromycin sensitive                              | BE983885  | 6.8927  | 4.1028 | 2.7899 |
| 1454877_at   | Sertad4       | SERTA domain containing 4                                       | BQ174721  | 8.9696  | 6.1865 | 2.7832 |
| 1440519_at   | Sp8           | trans-acting transcription factor 8                             | AV302930  | 6.3376  | 3.5546 | 2.7830 |
| 1435396_at   | Stxbp6        | syntaxin binding protein 6 (amisyn)                             | BM218509  | 5.8055  | 3.0227 | 2.7828 |
| 1438133_a_at | Cyr61         | cysteine rich protein 61                                        | BM202770  | 11.3822 | 8.6011 | 2.7811 |
| 1444524_at   | Gm14005       | predicted gene 14005                                            | BE943672  | 9.7289  | 6.9643 | 2.7646 |
| 1456929_at   | BC042782      | cDNA sequence BC042782                                          | BM235852  | 6.2067  | 3.4443 | 2.7625 |
| 1417061_at   | Slc40a1       | solute carrier family 40 (iron-regulated transporter), member 1 | AF226613  | 6.9948  | 4.2333 | 2.7615 |
| 1431057_a_at | Prss23        | protease, serine, 23                                            | AK009847  | 9.4624  | 6.7079 | 2.7544 |
| 1448562_at   | Upp1          | uridine phosphorylase 1                                         | NM_009477 | 8.9490  | 6.2005 | 2.7485 |
| 1430310_at   | Tspan11       | tetraspanin 11                                                  | BB535262  | 7.1599  | 4.4204 | 2.7395 |
| 1422038_a_at | Tnfrsf22      | tumor necrosis factor receptor superfamily, member 22           | NM_023680 | 7.7042  | 4.9657 | 2.7385 |
| 1452107_s_at | Npnt          | nephronectin                                                    | AA223007  | 6.1807  | 3.4443 | 2.7365 |
| 1418288_at   | Lpin1         | lipin 1                                                         | NM_015763 | 9.0739  | 6.3376 | 2.7363 |
| 1422771_at   | Smad6         | SMAD family member 6                                            | AF010133  | 7.7316  | 4.9989 | 2.7327 |
| 1419666_x_at | Nupr1         | nuclear protein 1                                               | NM_019738 | 11.7573 | 9.0248 | 2.7325 |
| 1443729_at   | Mtss1         | metastasis suppressor 1                                         | BI466419  | 6.8303  | 4.1035 | 2.7268 |
| 1448014_s_at | Usp24         | ubiquitin specific peptidase 24                                 | AI196993  | 9.0421  | 6.3376 | 2.7044 |
| 1433775_at   | C77080        | expressed sequence C77080                                       | BB163333  | 9.1452  | 6.4409 | 2.7043 |

|              |               |                                                                                 |           |         |        |        |
|--------------|---------------|---------------------------------------------------------------------------------|-----------|---------|--------|--------|
| 1434096_at   | Slc4a4        | solute carrier family 4 (anion exchanger), member 4                             | BB283443  | 6.2200  | 3.5184 | 2.7016 |
| 1430038_at   | Gphn          | gephyrin                                                                        | AK017831  | 8.4507  | 5.7515 | 2.6992 |
| 1448028_at   | Tbc1d24       | TBC1 domain family, member 24                                                   | BF536757  | 7.8870  | 5.1918 | 2.6953 |
| 1423835_at   | Zfp503        | zinc finger protein 503                                                         | BB447914  | 6.4410  | 3.7465 | 2.6945 |
| 1457682_at   | Arhgap42      | Rho GTPase activating protein 42                                                | AV368701  | 6.1607  | 3.4701 | 2.6906 |
| 1426516_a_at | Lpin1         | lipin 1                                                                         | AK014526  | 9.7562  | 7.0683 | 2.6878 |
| 1440833_at   | Cdk13         | cyclin-dependent kinase 13                                                      | BG070538  | 8.4630  | 5.7781 | 2.6849 |
| 1426850_a_at | Map2k6        | mitogen-activated protein kinase kinase 6                                       | BB261602  | 7.0433  | 4.3588 | 2.6845 |
| 1421106_at   | Jag1          | jagged 1                                                                        | AA880220  | 8.0221  | 5.3414 | 2.6807 |
| 1456284_at   | Tmem171       | transmembrane protein 171                                                       | BB701775  | 8.8196  | 6.1404 | 2.6792 |
| 1420450_at   | Mmp10         | matrix metalloproteinase 10                                                     | NM_019471 | 7.8384  | 5.1653 | 2.6731 |
| 1422540_at   | Fbln1         | fibulin 1                                                                       | NM_010180 | 7.5434  | 4.8719 | 2.6715 |
| 1421228_at   | Ccl7          | chemokine (C-C motif) ligand 7                                                  | AF128193  | 7.4928  | 4.8229 | 2.6699 |
| 1436942_at   | A930035D04Rik | RIKEN cDNA A930035D04 gene                                                      | AW123929  | 7.5840  | 4.9195 | 2.6645 |
| 1421296_at   | Tnfrsf10b     | tumor necrosis factor receptor superfamily, member 10b                          | NM_020275 | 6.8313  | 4.1689 | 2.6624 |
| 1449449_at   | Ptges         | prostaglandin E synthase                                                        | NM_022415 | 7.5804  | 4.9195 | 2.6610 |
| 1453070_at   | Pcdh17        | protocadherin 17                                                                | BB305930  | 8.8070  | 6.1503 | 2.6566 |
| 1417526_at   | Pcbp3         | poly(rC) binding protein 3                                                      | NM_021568 | 7.8171  | 5.1653 | 2.6519 |
| 1419665_a_at | Nupr1         | nuclear protein 1                                                               | NM_019738 | 11.8786 | 9.2293 | 2.6493 |
| 1422324_a_at | Pthlh         | parathyroid hormone-like peptide                                                | NM_008970 | 5.8461  | 3.1972 | 2.6489 |
| 1420160_s_at | Myo1e         | myosin IE                                                                       | AA407778  | 9.2464  | 6.5981 | 2.6483 |
| 1438672_at   | Parvb         | parvin, beta                                                                    | BI134721  | 10.2100 | 7.5633 | 2.6467 |
| 1437404_at   | Mast4         | microtubule associated serine/threonine kinase family member 4                  | AI642422  | 7.0126  | 4.3659 | 2.6467 |
| 1458963_at   | Ttc39b        | tetratricopeptide repeat domain 39B                                             | BB397062  | 7.5180  | 4.8719 | 2.6461 |
| 1457675_at   | 2510002D24Rik | RIKEN cDNA 2510002D24 gene                                                      | BG063089  | 7.5173  | 4.8719 | 2.6455 |
| 1420382_at   | Apobr         | apolipoprotein B receptor                                                       | NM_138310 | 8.2848  | 5.6402 | 2.6446 |
| 1418471_at   | Pgf           | placental growth factor                                                         | NM_008827 | 8.6711  | 6.0270 | 2.6441 |
| 1426968_a_at | Rdh10         | retinol dehydrogenase 10 (all-trans)                                            | BG073496  | 9.3615  | 6.7217 | 2.6399 |
| 1434777_at   | Mycl1         | v-myc myelocytomatosis viral oncogene homolog 1, lung carcinoma derived (avian) | BG064871  | 6.8729  | 4.2333 | 2.6396 |
| 1439256_x_at | Gpr137b-ps    | G protein-coupled receptor 137B, pseudogene                                     | BB726971  | 9.8505  | 7.2147 | 2.6358 |
| 1429692_s_at | Gch1          | GTP cyclohydrolase 1                                                            | BB698398  | 8.0093  | 5.3765 | 2.6328 |
| 1419663_at   | Ogn           | osteoglycin                                                                     | BB542051  | 5.8297  | 3.1972 | 2.6325 |
| 1446417_at   |               |                                                                                 | AW553625  | 7.2935  | 4.6674 | 2.6260 |
| 1448606_at   | Lpar1         | lysophosphatidic acid receptor 1                                                | U70622    | 7.8151  | 5.1918 | 2.6233 |
| 1420352_at   | Prss22        | protease, serine, 22                                                            | NM_133731 | 7.0809  | 4.4597 | 2.6213 |
| 1422982_at   | Ar            | androgen receptor                                                               | NM_013476 | 7.0210  | 4.3997 | 2.6213 |
| 1439255_s_at |               |                                                                                 | BB726971  | 9.8184  | 7.1987 | 2.6197 |
| 1442321_at   | Commd2        | COMM domain containing 2                                                        | BE853420  | 6.5881  | 3.9701 | 2.6180 |
| 1425503_at   | Gcnt2         | glucosaminyl (N-acetyl) transferase 2, I-branching enzyme                       | AB037596  | 8.6422  | 6.0293 | 2.6129 |
| 1419603_at   | Ifi204        | interferon activated gene 204                                                   | NM_008329 | 7.4334  | 4.8229 | 2.6105 |
| 1450065_at   | Adcy7         | adenylate cyclase 7                                                             | NM_007406 | 8.6578  | 6.0489 | 2.6088 |
| 1422054_a_at | Skil          | SKI-like                                                                        | U36203    | 6.0270  | 3.4250 | 2.6020 |
| 1438021_at   | Rbm47         | RNA binding motif protein 47                                                    | BB400564  | 5.9068  | 3.3086 | 2.5982 |
| 1449036_at   | Rnf128        | ring finger protein 128                                                         | AK004847  | 8.3497  | 5.7515 | 2.5981 |
| 1424220_a_at | Porcn         | porcupine homolog (Drosophila)                                                  | AB036749  | 7.7205  | 5.1247 | 2.5958 |
| 1450781_at   | Hmga2         | high mobility group AT-hook 2                                                   | X58380    | 11.0095 | 8.4149 | 2.5946 |
| 1417401_at   | Rai14         | retinoic acid induced 14                                                        | NM_030690 | 8.5541  | 5.9620 | 2.5921 |
| 1451983_at   | Irx1          | Iroquois related homeobox 1 (Drosophila)                                        | AF165984  | 6.4923  | 3.9024 | 2.5899 |
| 1428682_at   | Zc3h6         | zinc finger CCCH type containing 6                                              | AK019473  | 7.7805  | 5.1918 | 2.5888 |
| 1450882_s_at |               |                                                                                 | AK010724  | 8.3696  | 5.7809 | 2.5887 |
| 1426955_at   | Col18a1       | collagen, type XVIII, alpha 1                                                   | D17546    | 10.2123 | 7.6254 | 2.5870 |
| 1420664_s_at | Procr         | protein C receptor, endothelial                                                 | NM_011171 | 8.4074  | 5.8212 | 2.5862 |
| 1441604_at   | Esd           | esterase D/formylglutathione hydrolase                                          | BM248597  | 8.6313  | 6.0465 | 2.5848 |
| 1417487_at   | Fosl1         | fos-like antigen 1                                                              | U34245    | 9.3388  | 6.7556 | 2.5832 |
| 1443847_x_at | Aff2          | AF4/FMR2 family, member 2                                                       | BB342212  | 5.8922  | 3.3093 | 2.5829 |
| 1449152_at   | Cdkn2b        | cyclin-dependent kinase inhibitor 2B (p15, inhibits CDK4)                       | AF059567  | 10.3633 | 7.7805 | 2.5827 |
| 1436919_at   | Trp53i11      | transformation related protein 53 inducible protein 11                          | BQ175031  | 7.1383  | 4.5566 | 2.5817 |
| 1417812_a_at | Lamb3         | laminin, beta 3                                                                 | NM_008484 | 6.7532  | 4.1719 | 2.5813 |
| 1418382_at   | Apcdd1        | adenomatous polyposis coli down-regulated 1                                     | BB770932  | 6.4534  | 3.8740 | 2.5794 |

|              |               |                                                                                 |           |         |         |        |
|--------------|---------------|---------------------------------------------------------------------------------|-----------|---------|---------|--------|
| 1437271_at   | Clcf1         | cardiotrophin-like cytokine factor 1                                            | BB825816  | 7.8572  | 5.2794  | 2.5778 |
| 1424507_at   | Rin1          | Ras and Rab interactor 1                                                        | BC011277  | 9.0043  | 6.4283  | 2.5760 |
| 1460319_at   | Fut8          | fucosyltransferase 8                                                            | NM_016893 | 10.3466 | 7.7749  | 2.5718 |
| 1449999_a_at | Cacna2d1      | calcium channel, voltage-dependent, alpha2/delta subunit 1                      | NM_009784 | 6.9073  | 4.3375  | 2.5698 |
| 1441481_at   | Mfap3l        | microfibrillar-associated protein 3-like                                        | AV262974  | 6.6707  | 4.1035  | 2.5672 |
| 1426271_at   | Smc5          | structural maintenance of chromosomes 5                                         | AV257384  | 9.7117  | 7.1485  | 2.5633 |
| 1432103_a_at | Sh3gl3        | SH3-domain GRB2-like 3                                                          | AK012114  | 6.4632  | 3.9024  | 2.5608 |
| 1453269_at   | Unc5b         | unc-5 homolog B (C. elegans)                                                    | AK018177  | 8.4946  | 5.9357  | 2.5589 |
| 1424099_at   | Gpx8          | glutathione peroxidase 8 (putative)                                             | BC019664  | 12.1147 | 9.5623  | 2.5524 |
| 1441940_x_at | Klhdc8a       | kelch domain containing 8A                                                      | BB180603  | 7.3238  | 4.7725  | 2.5513 |
| 1444908_at   | Habp4         | hyaluronic acid binding protein 4                                               | BM228113  | 6.9450  | 4.3997  | 2.5452 |
| 1427437_at   |               |                                                                                 | BC019134  | 7.2050  | 4.6610  | 2.5440 |
| 1420413_at   | Slc7a11       | solute carrier family 7 (cationic amino acid transporter, y+ system), member 11 | NM_011990 | 7.4140  | 4.8719  | 2.5421 |
| 1444432_at   | D330040H18Rik | RIKEN cDNA D330040H18 gene                                                      | BB532898  | 5.6918  | 3.1525  | 2.5393 |
| 1422912_at   | Bmp4          | bone morphogenetic protein 4                                                    | NM_007554 | 6.7079  | 4.1689  | 2.5390 |
| 1420731_a_at | Csrp2         | cysteine and glycine-rich protein 2                                             | NM_007792 | 11.7566 | 9.2177  | 2.5389 |
| 1450377_at   | Thbs1         | thrombospondin 1                                                                | AI385532  | 6.6421  | 4.1035  | 2.5386 |
| 1434111_at   | Lphn2         | latrophilin 2                                                                   | BG966339  | 7.3610  | 4.8229  | 2.5381 |
| 1425094_a_at | Lhx6          | LIM homeobox protein 6                                                          | AB031040  | 6.9720  | 4.4385  | 2.5335 |
| 1426471_at   | Zfp52         | zinc finger protein 52                                                          | BM225280  | 10.5054 | 7.9779  | 2.5275 |
| 1452214_at   | Skil          | SKI-like                                                                        | AK018608  | 10.7391 | 8.2121  | 2.5270 |
| 1444290_at   | Steap2        | six transmembrane epithelial antigen of prostate 2                              | AV369536  | 6.8835  | 4.3588  | 2.5247 |
| 1418253_a_at | Hspa4l        | heat shock protein 4 like                                                       | NM_011020 | 10.6569 | 8.1372  | 2.5197 |
| 1437671_x_at | Prss23        | protease, serine, 23                                                            | BB378796  | 10.0189 | 7.5068  | 2.5121 |
| 1423869_s_at | Txnrd3        | thioredoxin reductase 3                                                         | AF349659  | 7.1823  | 4.6711  | 2.5113 |
| 1428415_at   | Rnf113a2      | ring finger protein 113A2                                                       | AK009420  | 5.4061  | 2.8950  | 2.5112 |
| 1442187_at   | Bdkrb2        | bradykinin receptor, beta 2                                                     | AW490711  | 5.9119  | 3.4010  | 2.5109 |
| 1442549_at   | Mbnl3         | muscleblind-like 3 (Drosophila)                                                 | BB211386  | 6.1570  | 3.6503  | 2.5066 |
| 1456623_at   | Tpm1          | tropomyosin 1, alpha                                                            | BM232388  | 8.2940  | 5.7878  | 2.5062 |
| 1428034_a_at | Tnfrsf9       | tumor necrosis factor receptor superfamily, member 9                            | BC028507  | 6.0865  | 3.5815  | 2.5050 |
| 1421207_at   | Lif           | leukemia inhibitory factor                                                      | AF065917  | 7.4693  | 4.9657  | 2.5036 |
| 1459681_at   |               |                                                                                 | AI451554  | 7.3323  | 4.8289  | 2.5034 |
| 1453293_a_at | 2810408A11Rik | RIKEN cDNA 2810408A11 gene                                                      | AK015537  | 5.9462  | 3.4443  | 2.5020 |
| 1439434_x_at | Sh2d5         | SH2 domain containing 5                                                         | BB317673  | 6.3315  | 3.8342  | 2.4973 |
| 1420150_at   | Spsb1         | splA/ryanodine receptor domain and SOCS box containing 1                        | AI596360  | 8.1660  | 5.6689  | 2.4971 |
| 1455970_at   | Pde5a         | phosphodiesterase 5A, cGMP-specific                                             | BE370618  | 5.2685  | 2.7744  | 2.4941 |
| 1417507_at   | Cyb561        | cytochrome b-561                                                                | BC006732  | 7.4584  | 4.9657  | 2.4927 |
| 1433930_at   | Hpse          | heparanase                                                                      | BG094050  | 9.8455  | 7.3560  | 2.4895 |
| 1420159_at   | Myo1e         | myosin IE                                                                       | AA407778  | 9.3870  | 6.8979  | 2.4891 |
| 1450920_at   | Ccnb2         | cyclin B2                                                                       | AK013312  | 13.8079 | 11.3190 | 2.4888 |
| 1417400_at   | Rai14         | retinoic acid induced 14                                                        | NM_030690 | 11.9336 | 9.4454  | 2.4882 |
| 1448593_at   | Wisp1         | WNT1 inducible signaling pathway protein 1                                      | NM_018865 | 7.4774  | 4.9897  | 2.4877 |
| 1448558_a_at | Pla2g4a       | phospholipase A2, group IVA (cytosolic, calcium-dependent)                      | NM_008869 | 10.6569 | 8.1698  | 2.4871 |
| 1416554_at   | Pdlim1        | PDZ and LIM domain 1 (elfin)                                                    | NM_016861 | 11.6067 | 9.1203  | 2.4864 |
| 1441824_at   | Mboat1        | membrane bound O-acyltransferase domain containing 1                            | AW457596  | 7.5828  | 5.0970  | 2.4858 |
| 1433670_at   | Emp2          | epithelial membrane protein 2                                                   | BE571790  | 10.5645 | 8.0833  | 2.4813 |
| 1445534_at   | Flnb          | filamin, beta                                                                   | BM206272  | 8.4243  | 5.9434  | 2.4809 |
| 1429479_at   | Magef1        | melanoma antigen family F, 1                                                    | AK018285  | 7.3026  | 4.8229  | 2.4797 |
| 1435771_at   | Plcb4         | phospholipase C, beta 4                                                         | BM730668  | 7.3506  | 4.8719  | 2.4787 |
| 1429503_at   | Fam69a        | family with sequence similarity 69, member A                                    | AK013580  | 8.4545  | 5.9820  | 2.4725 |
| 1451038_at   | Apln          | apelin                                                                          | BB819942  | 7.8757  | 5.4108  | 2.4649 |
| 1436866_at   | Efna5         | ephrin A5                                                                       | BQ173967  | 9.1207  | 6.6564  | 2.4642 |
| 1454904_at   | Mtm1          | X-linked myotubular myopathy gene 1                                             | BG976607  | 9.7891  | 7.3261  | 2.4629 |
| 1420594_at   | Bard1         | BRCA1 associated RING domain 1                                                  | NM_007525 | 7.2340  | 4.7725  | 2.4615 |
| 1439341_at   | Greb1l        | growth regulation by estrogen in breast cancer-like                             | BB203252  | 7.1280  | 4.6674  | 2.4605 |
| 1425749_at   | Stxbp6        | syntaxin binding protein 6 (amisyn)                                             | BC024598  | 5.7515  | 3.2955  | 2.4560 |
| 1429777_at   | Dnajb6        | DnaJ (Hsp40) homolog, subfamily B, member 6                                     | AK005680  | 8.4074  | 5.9590  | 2.4484 |
| 1426098_a_at | Cast          | calpastatin                                                                     | AF190152  | 9.4516  | 7.0053  | 2.4464 |

|              |               |                                                                                     |           |         |        |        |
|--------------|---------------|-------------------------------------------------------------------------------------|-----------|---------|--------|--------|
| 1452908_at   | Dip2a         | DIP2 disco-interacting protein 2 homolog A (Drosophila)                             | BB794700  | 10.2729 | 7.8279 | 2.4451 |
| 1427127_x_at | Hspa1b        | heat shock protein 1B                                                               | M12573    | 9.5409  | 7.1002 | 2.4406 |
| 1418237_s_at | Col18a1       | collagen, type XVIII, alpha 1                                                       | NM_009929 | 10.2864 | 7.8548 | 2.4317 |
| 1433741_at   | Cd38          | CD38 antigen                                                                        | BB256012  | 8.7508  | 6.3197 | 2.4311 |
| 1426571_at   | Ano1          | anoctamin 1, calcium activated chloride channel                                     | AW910499  | 8.4787  | 6.0489 | 2.4297 |
| 1416701_at   | Rnd3          | Rho family GTPase 3                                                                 | BC009002  | 7.7339  | 5.3054 | 2.4285 |
| 1436304_at   | Tmem200a      | transmembrane protein 200A                                                          | BB025239  | 8.2314  | 5.8041 | 2.4273 |
| 1428057_a_at | Ahnak         | AHNAK nucleoprotein (desmoyokin)                                                    | BC028439  | 9.8352  | 7.4083 | 2.4269 |
| 1417959_at   | Pdlim7        | PDZ and LIM domain 7                                                                | NM_026131 | 9.0396  | 6.6129 | 2.4267 |
| 1436003_at   | Vcam1         | vascular cell adhesion molecule 1                                                   | AV280637  | 5.3854  | 2.9592 | 2.4263 |
| 1434674_at   | Lyst          | lysosomal trafficking regulator                                                     | BB463428  | 8.7092  | 6.2831 | 2.4261 |
| 1422851_at   | Hmga2         | high mobility group AT-hook 2                                                       | X58380    | 11.3889 | 8.9731 | 2.4158 |
| 1417649_at   | Cdkn1c        | cyclin-dependent kinase inhibitor 1C (P57)                                          | NM_009876 | 9.0270  | 6.6129 | 2.4141 |
| 1440972_at   | Nsd1          | nuclear receptor-binding SET-domain protein 1                                       | AI413236  | 5.5660  | 3.1525 | 2.4135 |
| 1428749_at   | Dmxl2         | Dmx-like 2                                                                          | AK018275  | 5.2465  | 2.8350 | 2.4115 |
| 1450744_at   | Ell2          | elongation factor RNA polymerase II 2                                               | NM_138953 | 8.1009  | 5.6926 | 2.4083 |
| 1426024_a_at | Dbn1          | drebrin 1                                                                           | AF187147  | 8.9190  | 6.5111 | 2.4079 |
| 1416871_at   | Adam8         | a disintegrin and metallopeptidase domain 8                                         | NM_007403 | 7.3701  | 4.9657 | 2.4043 |
| 1420512_at   | Dkk2          | dickkopf homolog 2 (Xenopus laevis)                                                 | NM_020265 | 5.4296  | 3.0255 | 2.4042 |
| 1434601_at   | Amigo2        | adhesion molecule with Ig like domain 2                                             | AV315087  | 5.8484  | 3.4443 | 2.4042 |
| 1440493_at   | Galnt10       | UDP-N-acetyl-alpha-D-galactosamine:polypeptide N-acetylgalactosaminyltransferase 10 | BB399121  | 7.7451  | 5.3414 | 2.4037 |
| 1418102_at   | Hes1          | hairy and enhancer of split 1 (Drosophila)                                          | BC018375  | 8.9125  | 6.5111 | 2.4014 |
| 1450016_at   | Ccng1         | cyclin G1                                                                           | BG065754  | 9.0577  | 6.6564 | 2.4012 |
| 1455795_at   | Dse           | dermatan sulfate epimerase                                                          | BM207218  | 6.1198  | 3.7192 | 2.4006 |
| 1420892_at   | Wnt7b         | wingless-related MMTV integration site 7B                                           | W29605    | 8.9732  | 6.5730 | 2.4002 |
| 1449773_s_at | Gadd45b       | growth arrest and DNA-damage-inducible 45 beta                                      | AI323528  | 9.6816  | 7.2835 | 2.3981 |
| 1423312_at   | Tpbp          | trophoblast glycoprotein                                                            | BQ177165  | 6.6923  | 4.2966 | 2.3956 |
| 1426852_x_at | Nov           | nephroblastoma overexpressed gene                                                   | X96585    | 5.5908  | 3.1972 | 2.3936 |
| 1427126_at   | Hspa1b        | heat shock protein 1B                                                               | M12573    | 9.0693  | 6.6801 | 2.3893 |
| 1421856_at   | S100a3        | S100 calcium binding protein A3                                                     | AF087470  | 6.8819  | 4.4990 | 2.3829 |
| 1441750_x_at | 4930447F24Rik | RIKEN cDNA 4930447F24 gene                                                          | BB796499  | 7.8572  | 5.4771 | 2.3801 |
| 1421378_s_at | Abcc1         | ATP-binding cassette, sub-family C (CFTR/MRP), member 1                             | NM_008576 | 8.9924  | 6.6129 | 2.3796 |
| 1422758_at   | Chst2         | carbohydrate sulfotransferase 2                                                     | NM_018763 | 6.0047  | 3.6256 | 2.3791 |
| 1419358_at   | Sorcs2        | sortilin-related VPS10 domain containing receptor 2                                 | NM_030889 | 6.2118  | 3.8342 | 2.3776 |
| 1441890_x_at | Tmeff1        | transmembrane protein with EGF-like and two follistatin-like domains 1              | BB366425  | 5.6402  | 3.2638 | 2.3765 |
| 1439888_at   | Gm15867       | predicted gene 15867                                                                | BB271581  | 5.8204  | 3.4443 | 2.3762 |
| 1418318_at   | Rnf128        | ring finger protein 128                                                             | AK004847  | 9.2316  | 6.8564 | 2.3752 |
| 1438783_at   |               |                                                                                     | BB325257  | 7.0422  | 4.6674 | 2.3747 |
| 1456446_at   | 4930523C07Rik | RIKEN cDNA 4930523C07 gene                                                          | BM246687  | 6.2582  | 3.8846 | 2.3736 |
| 1459948_at   |               |                                                                                     | BB552070  | 5.6402  | 3.2672 | 2.3730 |
| 1440084_at   |               |                                                                                     | AV380966  | 6.1607  | 3.7880 | 2.3727 |
| 1417143_at   | Lpar1         | lysophosphatidic acid receptor 1                                                    | U70622    | 7.5621  | 5.1918 | 2.3703 |
| 1422075_at   | Cdx2          | caudal type homeobox 2                                                              | NM_007673 | 6.3401  | 3.9701 | 2.3700 |
| 1439313_at   | Lphn3         | latrophilin 3                                                                       | AV338336  | 5.8131  | 3.4443 | 2.3689 |
| 1420654_a_at | Gbe1          | glucan (1,4-alpha-), branching enzyme 1                                             | NM_028803 | 8.6612  | 6.2950 | 2.3661 |
| 1460204_at   | Tec           | tec protein tyrosine kinase                                                         | NM_013689 | 7.2855  | 4.9195 | 2.3660 |
| 1434817_s_at | Rprd2         | regulation of nuclear pre-mRNA domain containing 2                                  | BM206427  | 9.6096  | 7.2446 | 2.3649 |
| 1425272_at   | Emp2          | epithelial membrane protein 2                                                       | AF083876  | 9.0165  | 6.6564 | 2.3600 |
| 1435671_at   | Mipol1        | mirror-image polydactyly gene 1 homolog (human)                                     | BB526605  | 8.4581  | 6.0989 | 2.3592 |
| 1419458_at   | Rgnef         | Rho-guanine nucleotide exchange factor                                              | BG069493  | 5.5535  | 3.1972 | 2.3563 |
| 1445866_at   | Mast4         | microtubule associated serine/threonine kinase family member 4                      | BB152945  | 6.4588  | 4.1035 | 2.3553 |
| 1438834_at   | Mospd2        | motile sperm domain containing 2                                                    | BB454345  | 6.8044  | 4.4499 | 2.3545 |
| 1460510_a_at | Coq10b        | coenzyme Q10 homolog B (S. cerevisiae)                                              | AK006551  | 9.9908  | 7.6381 | 2.3527 |
| 1426929_at   | Celf4         | CUGBP, Elav-like family member 4                                                    | AV327653  | 9.3935  | 7.0425 | 2.3510 |
| 1420851_at   | Pard6g        | par-6 partitioning defective 6 homolog gamma (C. elegans)                           | NM_053117 | 8.8070  | 6.4574 | 2.3496 |

|              |         |                                                                                                 |           |         |        |        |
|--------------|---------|-------------------------------------------------------------------------------------------------|-----------|---------|--------|--------|
| 1436898_at   |         |                                                                                                 | BI738328  | 9.9877  | 7.6403 | 2.3475 |
| 1417149_at   | P4ha2   | procollagen-proline, 2-oxoglutarate 4-dioxygenase (proline 4-hydroxylase), alpha II polypeptide | NM_011031 | 10.1675 | 7.8216 | 2.3460 |
| 1416527_at   | Rab32   | RAB32, member RAS oncogene family                                                               | NM_026405 | 7.9141  | 5.5683 | 2.3458 |
| 1421852_at   | Kcnk5   | potassium channel, subfamily K, member 5                                                        | AF319542  | 7.5094  | 5.1653 | 2.3442 |
| 1422833_at   | Foxa2   | forkhead box A2                                                                                 | NM_010446 | 6.8029  | 4.4597 | 2.3432 |
| 1434939_at   | Foxf1   | forkhead box F1                                                                                 | BB437522  | 9.8599  | 7.5170 | 2.3428 |
| 1424452_at   | Sltm    | SAFB-like, transcription modulator                                                              | BC019992  | 12.0501 | 9.7107 | 2.3394 |
| 1419322_at   | Fgd6    | FYVE, RhoGEF and PH domain containing 6                                                         | NM_053072 | 7.6316  | 5.2972 | 2.3344 |
| 1417985_at   | Nrarp   | Notch-regulated ankyrin repeat protein                                                          | BI696369  | 6.9879  | 4.6543 | 2.3336 |
| 1425155_x_at | Csf1    | colony stimulating factor 1 (macrophage)                                                        | M21149    | 7.8634  | 5.5301 | 2.3333 |
| 1444229_at   | Nr2f2   | nuclear receptor subfamily 2, group F, member 2                                                 | BB053811  | 5.7082  | 3.3762 | 2.3320 |
| 1438724_at   | Osbp13  | oxysterol binding protein-like 3                                                                | AI875442  | 6.3376  | 4.0079 | 2.3297 |
| 1429637_at   | Fam198b | family with sequence similarity 198, member B                                                   | AK008987  | 5.3501  | 3.0227 | 2.3274 |
| 1452318_a_at | Hspa1b  | heat shock protein 1B                                                                           | M12573    | 10.3218 | 8.0049 | 2.3169 |
| 1421732_at   | Glrp1   | glutamine repeat protein 1                                                                      | NM_008132 | 8.4630  | 6.1524 | 2.3106 |
| 1419505_a_at | Ggps1   | geranylgeranyl diphosphate synthase 1                                                           | NM_010282 | 8.1315  | 5.8212 | 2.3103 |
| 1416483_at   | Ttc3    | tetratricopeptide repeat domain 3                                                               | BB833716  | 10.3259 | 8.0161 | 2.3098 |
| 1440952_at   |         |                                                                                                 | BM123777  | 6.5424  | 4.2333 | 2.3091 |
| 1423488_at   | Mmd     | monocyte to macrophage differentiation-associated                                               | BC021914  | 9.9937  | 7.6856 | 2.3081 |
| 1416069_at   | Pfkip   | phosphofructokinase, platelet                                                                   | NM_019703 | 11.4386 | 9.1332 | 2.3053 |
| 1448494_at   | Gas1    | growth arrest specific 1                                                                        | BB550400  | 5.5423  | 3.2390 | 2.3033 |
| 1420551_at   | Murc    | muscle-related coiled-coil protein                                                              | NM_026509 | 6.5943  | 4.2966 | 2.2977 |
| 1422243_at   | Fgf7    | fibroblast growth factor 7                                                                      | NM_008008 | 7.5278  | 5.2306 | 2.2972 |
| 1460009_at   | Ier5    | immediate early response 5                                                                      | BB667115  | 5.7395  | 3.4443 | 2.2952 |
| 1415999_at   | Hey1    | hairy/enhancer-of-split related with YRPW motif 1                                               | NM_010423 | 7.1622  | 4.8719 | 2.2903 |
| 1440882_at   | Lrp8    | low density lipoprotein receptor-related protein 8, apolipoprotein e receptor                   | BB750940  | 9.8120  | 7.5226 | 2.2894 |
| 1427683_at   | Egr2    | early growth response 2                                                                         | X06746    | 8.1508  | 5.8632 | 2.2876 |
| 1453596_at   | Id2     | inhibitor of DNA binding 2                                                                      | AK013239  | 5.7981  | 3.5127 | 2.2854 |
| 1421493_a_at | Rgs20   | regulator of G-protein signaling 20                                                             | NM_021374 | 5.7806  | 3.4968 | 2.2838 |
| 1454809_at   | Ncoa7   | nuclear receptor coactivator 7                                                                  | BE686893  | 9.7033  | 7.4224 | 2.2809 |
| 1421321_a_at | Net1    | neuroepithelial cell transforming gene 1                                                        | NM_019671 | 7.9756  | 5.6970 | 2.2786 |
| 1420394_s_at |         |                                                                                                 | U05264    | 5.9491  | 3.6723 | 2.2768 |
| 1456937_at   | Cdh26   | cadherin-like 26                                                                                | BB748621  | 7.0061  | 4.7297 | 2.2764 |
| 1427541_x_at | Hmmer   | hyaluronan mediated motility receptor (RHAMM)                                                   | X64550    | 7.9979  | 5.7255 | 2.2725 |
| 1426478_at   | Rasa1   | RAS p21 protein activator 1                                                                     | AA124924  | 8.4914  | 6.2200 | 2.2714 |
| 1435649_at   | Nexn    | nexilin                                                                                         | BM225804  | 6.7690  | 4.4990 | 2.2700 |
| 1419030_at   | Ero1l   | ERO1-like (S. cerevisiae)                                                                       | BM234652  | 10.2127 | 7.9481 | 2.2646 |
| 1446560_at   | Prss23  | protease, serine, 23                                                                            | BB084614  | 5.4108  | 3.1525 | 2.2583 |
| 1430177_at   | Ube2b   | ubiquitin-conjugating enzyme E2B                                                                | AK011961  | 6.6170  | 4.3588 | 2.2583 |
| 1426640_s_at | Trib2   | tribbles homolog 2 (Drosophila)                                                                 | BB354684  | 9.1337  | 6.8770 | 2.2567 |
| 1453156_s_at | Ptgr2   | prostaglandin reductase 2                                                                       | BE283373  | 5.6980  | 3.4443 | 2.2537 |
| 1430826_s_at | Gcnt2   | glucosaminyl (N-acetyl) transferase 2, I-branching enzyme                                       | AK019924  | 5.5823  | 3.3307 | 2.2517 |
| 1457556_at   | Gm17501 | predicted gene, 17501                                                                           | BB215882  | 6.5578  | 4.3073 | 2.2505 |
| 1417129_a_at | Meis2   | Meis homeobox 2                                                                                 | U68384    | 9.0558  | 6.8057 | 2.2501 |
| 1422632_at   | Ctsw    | cathepsin W                                                                                     | NM_009985 | 7.0729  | 4.8229 | 2.2500 |
| 1460632_at   | Rdh10   | retinol dehydrogenase 10 (all-trans)                                                            | BG069583  | 7.7627  | 5.5135 | 2.2492 |
| 1435968_at   | Ptprn2  | protein tyrosine phosphatase, receptor type, N polypeptide 2                                    | BI794694  | 5.8301  | 3.5810 | 2.2491 |
| 1426472_at   | Zfp52   | zinc finger protein 52                                                                          | BM225280  | 5.8274  | 3.5815 | 2.2459 |
| 1449078_at   | St3gal6 | ST3 beta-galactoside alpha-2,3-sialyltransferase 6                                              | NM_018784 | 7.7431  | 5.4985 | 2.2446 |
| 1457828_at   | Stam    | signal transducing adaptor molecule (SH3 domain and ITAM motif) 1                               | BE690800  | 6.8973  | 4.6547 | 2.2426 |
| 1447242_at   |         |                                                                                                 | BG092767  | 6.6416  | 4.3997 | 2.2419 |
| 1419457_at   | Rgnef   | Rho-guanine nucleotide exchange factor                                                          | BG069493  | 6.7002  | 4.4597 | 2.2406 |
| 1419012_at   | Zfpm2   | zinc finger protein, multitype 2                                                                | NM_011766 | 7.8390  | 5.5990 | 2.2401 |
| 1425391_a_at | Osbp15  | oxysterol binding protein-like 5                                                                | AB074008  | 7.5434  | 5.3054 | 2.2380 |
| 1423489_at   | Mmd     | monocyte to macrophage differentiation-associated                                               | BC021914  | 10.0209 | 7.7887 | 2.2323 |

|              |               |                                                                          |           |         |        |        |
|--------------|---------------|--------------------------------------------------------------------------|-----------|---------|--------|--------|
| 1455492_at   | B330016D10Rik | RIKEN cDNA B330016D10 gene                                               | BB313577  | 5.6110  | 3.3795 | 2.2316 |
| 1453361_at   | Hells         | helicase, lymphoid specific                                              | BM213590  | 6.3554  | 4.1247 | 2.2307 |
| 1457632_s_at | Meis2         | Meis homeobox 2                                                          | BB207647  | 9.1920  | 6.9643 | 2.2276 |
| 1421142_s_at | Foxp1         | forkhead box P1                                                          | BG962849  | 9.2035  | 6.9758 | 2.2276 |
| 1435750_at   | Gchfr         | GTP cyclohydrolase I feedback regulator                                  | BB610454  | 9.1214  | 6.8973 | 2.2241 |
| 1441968_at   | Tspan9        | tetraspanin 9                                                            | BB101988  | 7.7836  | 5.5610 | 2.2227 |
| 1432604_at   | Rbl1          | retinoblastoma-like 1 (p107)                                             | AA990586  | 6.5503  | 4.3290 | 2.2213 |
| 1438441_at   |               |                                                                          | AI323288  | 5.1786  | 2.9592 | 2.2194 |
| 1418046_at   | Nap1l2        | nucleosome assembly protein 1-like 2                                     | NM_008671 | 5.2389  | 3.0227 | 2.2162 |
| 1438494_at   | Hrh1          | histamine receptor H1                                                    | BB051552  | 6.0026  | 3.7880 | 2.2146 |
| 1447063_at   | 1700017B05Rik | RIKEN cDNA 1700017B05 gene                                               | BB273020  | 5.9998  | 3.7880 | 2.2118 |
| 1450402_at   | Med1          | mediator complex subunit 1                                               | BB760479  | 6.9841  | 4.7725 | 2.2116 |
| 1454043_a_at | Kcnab1        | potassium voltage-gated channel, shaker-related subfamily, beta member 1 | AK015412  | 6.3795  | 4.1689 | 2.2106 |
| 1443117_at   | Eya1          | eyes absent 1 homolog (Drosophila)                                       | BB298032  | 5.4720  | 3.2638 | 2.2082 |
| 1449949_a_at | Cxadr         | coxsackie virus and adenovirus receptor                                  | U90715    | 6.7079  | 4.5076 | 2.2003 |
| 1417316_at   | Acot13        | acyl-CoA thioesterase 13                                                 | NM_025790 | 10.9343 | 8.7377 | 2.1967 |
| 1458341_x_at | Pde5a         | phosphodiesterase 5A, cGMP-specific                                      | BB397841  | 6.0047  | 3.8081 | 2.1966 |
| 1460521_a_at | Nabp1         | nucleic acid binding protein 1                                           | AK015312  | 5.7781  | 3.5815 | 2.1966 |
| 1451496_at   | Mtss1         | metastasis suppressor 1                                                  | BC024131  | 7.2935  | 5.0970 | 2.1965 |
| 1438829_at   | Rnf165        | ring finger protein 165                                                  | BB801060  | 7.8650  | 5.6689 | 2.1961 |
| 1427682_a_at | Egr2          | early growth response 2                                                  | X06746    | 7.9993  | 5.8041 | 2.1952 |
| 1429114_at   | Sestd1        | SEC14 and spectrin domains 1                                             | AV276619  | 9.1160  | 6.9213 | 2.1947 |
| 1428921_at   | 2810021B07Rik | RIKEN cDNA 2810021B07 gene                                               | AK021189  | 5.9820  | 3.7880 | 2.1941 |
| 1416832_at   | Slc39a8       | solute carrier family 39 (metal ion transporter), member 8               | NM_026228 | 6.0270  | 3.8342 | 2.1927 |
| 1457164_at   | Trpa1         | transient receptor potential cation channel, subfamily A, member 1       | BB309395  | 7.2750  | 5.0855 | 2.1894 |
| 1448300_at   | Mgst3         | microsomal glutathione S-transferase 3                                   | NM_025569 | 9.8154  | 7.6260 | 2.1894 |
| 1419029_at   | Ero1l         | ERO1-like (S. cerevisiae)                                                | BM234652  | 11.6326 | 9.4483 | 2.1843 |
| 1438690_at   | Tyms          | thymidylate synthase                                                     | BM068975  | 7.0557  | 4.8719 | 2.1838 |
| 1448942_at   | Gng11         | guanine nucleotide binding protein (G protein), gamma 11                 | NM_025331 | 9.2813  | 7.0980 | 2.1834 |
| 1424528_at   | Cgref1        | cell growth regulator with EF hand domain 1                              | BC023116  | 7.9747  | 5.7914 | 2.1833 |
| 1421141_a_at | Foxp1         | forkhead box P1                                                          | BG962849  | 9.4489  | 7.2663 | 2.1826 |
| 1429676_at   |               |                                                                          | AK008862  | 7.3855  | 5.2044 | 2.1811 |
| 1442726_s_at | AI845619      | expressed sequence AI845619                                              | AW457339  | 6.6801  | 4.4990 | 2.1811 |
| 1426339_at   | Ak5           | adenylate kinase 5                                                       | AB060081  | 7.2340  | 5.0544 | 2.1796 |
| 1424226_at   | 9030617O03Rik | RIKEN cDNA 9030617O03 gene                                               | BC021385  | 7.2750  | 5.0970 | 2.1780 |
| 1428834_at   | Dusp4         | dual specificity phosphatase 4                                           | AK012530  | 9.2189  | 7.0437 | 2.1752 |
| 1454094_at   | 4930471E19Rik | RIKEN cDNA 4930471E19 gene                                               | AK015549  | 6.9605  | 4.7875 | 2.1730 |
| 1459879_at   | Marf1         | meiosis arrest female 1                                                  | AW492820  | 7.1383  | 4.9657 | 2.1725 |
| 1449429_at   | Fkbp1b        | FK506 binding protein 1b                                                 | NM_016863 | 7.7828  | 5.6110 | 2.1717 |
| 1435176_a_at | Id2           | inhibitor of DNA binding 2                                               | BF019883  | 10.2335 | 8.0618 | 2.1716 |
| 1418655_at   | B4galnt1      | beta-1,4-N-acetyl-galactosaminyl transferase 1                           | U18975    | 5.1938  | 3.0227 | 2.1710 |
| 1456545_at   | Il18rap       | interleukin 18 receptor accessory protein                                | AV247387  | 7.7316  | 5.5610 | 2.1706 |
| 1434739_at   | Fmr1nb        | fragile X mental retardation 1 neighbor                                  | AW542416  | 6.0047  | 3.8342 | 2.1704 |
| 1423389_at   | Smad7         | SMAD family member 7                                                     | BF226166  | 8.3605  | 6.1914 | 2.1691 |
| 1434974_at   | Pdk1          | pyruvate dehydrogenase kinase, isoenzyme 1                               | BB391928  | 6.2040  | 4.0372 | 2.1668 |
| 1434348_at   | Fez2          | fasciculation and elongation protein zeta 2 (zygin II)                   | BM206792  | 9.5165  | 7.3506 | 2.1660 |
| 1423310_at   | Tpbp          | trophoblast glycoprotein                                                 | BQ177165  | 8.7788  | 6.6129 | 2.1659 |
| 1426476_at   | Rasa1         | RAS p21 protein activator 1                                              | AA124924  | 10.7702 | 8.6044 | 2.1658 |
| 1440037_at   | Pbx1          | pre B cell leukemia homeobox 1                                           | BB480970  | 6.8786  | 4.7207 | 2.1579 |
| 1434359_at   | Fam65b        | family with sequence similarity 65, member B                             | AV329070  | 5.4196  | 3.2638 | 2.1559 |
| 1455149_at   | Sh3rf1        | SH3 domain containing ring finger 1                                      | BB072090  | 7.5664  | 5.4109 | 2.1555 |
| 1428487_s_at | Coq10b        | coenzyme Q10 homolog B (S. cerevisiae)                                   | AK002294  | 9.0795  | 6.9254 | 2.1541 |
| 1428758_at   | Tmem86a       | transmembrane protein 86A                                                | AK007864  | 7.9033  | 5.7515 | 2.1518 |
| 1436322_a_at | 2810001A02Rik | RIKEN cDNA 2810001A02 gene                                               | BE952576  | 10.0817 | 7.9372 | 2.1444 |
| 1444406_at   |               |                                                                          | AI504848  | 6.5730  | 4.4288 | 2.1442 |
| 1431430_s_at | Trim59        | tripartite motif-containing 59                                           | AK012269  | 7.7674  | 5.6281 | 2.1393 |
| 1440559_at   | Hmga2-ps1     | high mobility group AT-hook 2, pseudogene 1                              | AV377334  | 6.3703  | 4.2333 | 2.1370 |
| 1439989_at   | Tsc1          | tuberous sclerosis 1                                                     | BB668097  | 6.0870  | 3.9512 | 2.1358 |
| 1455619_at   | BC062258      | cDNA sequence BC062258                                                   | AA185687  | 7.7743  | 5.6402 | 2.1341 |
| 1452415_at   | Actn1         | actinin, alpha 1                                                         | BC003232  | 8.4520  | 6.3191 | 2.1330 |
| 1454942_at   | Fam129a       | family with sequence similarity 129, member A                            | AW554191  | 8.8524  | 6.7217 | 2.1307 |

|              |               |                                                                                                                                             |           |         |         |        |
|--------------|---------------|---------------------------------------------------------------------------------------------------------------------------------------------|-----------|---------|---------|--------|
| 1434700_at   | G2e3          | G2/M-phase specific E3 ubiquitin ligase                                                                                                     | BM123748  | 9.8404  | 7.7111  | 2.1293 |
| 1420909_at   | Vegfa         | vascular endothelial growth factor A                                                                                                        | NM_009505 | 9.5740  | 7.4474  | 2.1266 |
| 1459185_at   | Npat          | nuclear protein in the AT region                                                                                                            | BG072840  | 6.6801  | 4.5566  | 2.1235 |
| 1425847_a_at | B230120H23Rik | RIKEN cDNA B230120H23 gene                                                                                                                  | AB049732  | 5.4982  | 3.3762  | 2.1220 |
| 1424581_at   | Stac2         | SH3 and cysteine rich domain 2                                                                                                              | BC024864  | 7.7607  | 5.6414  | 2.1193 |
| 1450700_at   | Cdc42ep3      | CDC42 effector protein (Rho GTPase binding) 3                                                                                               | BB012489  | 7.5621  | 5.4443  | 2.1177 |
| 1426806_at   | Nabp1         | nucleic acid binding protein 1                                                                                                              | AV313559  | 7.5155  | 5.3986  | 2.1170 |
| 1441161_at   | B230216G23Rik | RIKEN cDNA B230216G23 gene                                                                                                                  | BB307791  | 6.2200  | 4.1035  | 2.1165 |
| 1436467_at   | D230004N17Rik | RIKEN cDNA D230004N17 gene                                                                                                                  | AU067749  | 6.2954  | 4.1794  | 2.1160 |
| 1424649_a_at | Tspan8        | tetraspanin 8                                                                                                                               | BC025461  | 5.6110  | 3.4955  | 2.1155 |
| 1435458_at   | Pim1          | proviral integration site 1                                                                                                                 | AI323550  | 9.2132  | 7.0984  | 2.1148 |
| 1452239_at   | Gt(ROSA)26Sor | gene trap ROSA 26, Philippe Soriano                                                                                                         | U83174    | 8.7532  | 6.6407  | 2.1126 |
| 1435479_at   | Bmp7          | bone morphogenetic protein 7                                                                                                                | BM055476  | 8.2052  | 6.0989  | 2.1063 |
| 1423311_s_at | Tpbp          | trophoblast glycoprotein                                                                                                                    | BQ177165  | 8.7031  | 6.5981  | 2.1050 |
| 1441743_at   | Pax3          | paired box gene 3                                                                                                                           | BB759978  | 8.2643  | 6.1619  | 2.1024 |
| 1459146_at   | Mapk6         | mitogen-activated protein kinase 6                                                                                                          | BB282686  | 5.8877  | 3.7880  | 2.0997 |
| 1450136_at   | Cd38          | CD38 antigen                                                                                                                                | NM_007646 | 5.4080  | 3.3086  | 2.0994 |
| 1427010_s_at | Lama5         | laminin, alpha 5                                                                                                                            | AV224009  | 8.0434  | 5.9447  | 2.0986 |
| 1435110_at   | Unc5b         | unc-5 homolog B (C. elegans)                                                                                                                | BG065285  | 8.2662  | 6.1676  | 2.0986 |
| 1416407_at   | Pea15a        | phosphoprotein enriched in astrocytes 15A                                                                                                   | AI323543  | 9.1664  | 7.0683  | 2.0981 |
| 1440878_at   | Runx1         | runt related transcription factor 1                                                                                                         | BB795285  | 6.3742  | 4.2764  | 2.0978 |
| 1438444_at   | Spink10       | serine peptidase inhibitor, Kazal type 10                                                                                                   | AV381832  | 5.8675  | 3.7758  | 2.0916 |
| 1437422_at   | Sema5a        | sema domain, seven thrombospondin repeats (type 1 and type 1-like), transmembrane domain (TM) and short cytoplasmic domain, (semaphorin) 5A | AV375653  | 5.3552  | 3.2638  | 2.0914 |
| 1424050_s_at | Fgfr1         | fibroblast growth factor receptor 1                                                                                                         | M33760    | 10.1263 | 8.0382  | 2.0881 |
| 1430623_s_at | Nabp1         | nucleic acid binding protein 1                                                                                                              | AV263881  | 6.5871  | 4.4990  | 2.0881 |
| 1452233_at   | Abcc1         | ATP-binding cassette, sub-family C (CFTR/MRP), member 1                                                                                     | BG071908  | 11.2696 | 9.1821  | 2.0876 |
| 1429005_at   | Mfhas1        | malignant fibrous histiocytoma amplified sequence 1                                                                                         | BB107412  | 9.8469  | 7.7607  | 2.0861 |
| 1428585_at   | Actn1         | actinin, alpha 1                                                                                                                            | BE853286  | 11.4763 | 9.3913  | 2.0850 |
| 1436993_x_at | Pfn2          | profilin 2                                                                                                                                  | BB560492  | 12.2920 | 10.2093 | 2.0827 |
| 1426477_at   | Rasa1         | RAS p21 protein activator 1                                                                                                                 | AA124924  | 10.4445 | 8.3623  | 2.0822 |
| 1426450_at   | Plcl2         | phospholipase C-like 2                                                                                                                      | BM207017  | 6.6939  | 4.6127  | 2.0812 |
| 1422720_at   | Isl1          | ISL1 transcription factor, LIM/homeodomain                                                                                                  | BQ176915  | 7.4224  | 5.3414  | 2.0810 |
| 1450650_at   | Myo10         | myosin X                                                                                                                                    | AV297945  | 9.6947  | 7.6138  | 2.0809 |
| 1418441_at   | Col8a1        | collagen, type VIII, alpha 1                                                                                                                | NM_007739 | 6.0489  | 3.9701  | 2.0788 |
| 1425598_a_at | Lyn           | Yamaguchi sarcoma viral (v-yes-1) oncogene homolog                                                                                          | M64608    | 7.4547  | 5.3765  | 2.0781 |
| 1442775_at   |               |                                                                                                                                             | AI481700  | 6.3902  | 4.3121  | 2.0781 |
| 1439348_at   | S100a10       | S100 calcium binding protein A10 (calpactin)                                                                                                | BB450829  | 9.0854  | 7.0073  | 2.0781 |
| 1450780_s_at | Hmga2         | high mobility group AT-hook 2                                                                                                               | X58380    | 11.2758 | 9.2027  | 2.0732 |
| 1428646_at   | Pbx1          | pre B cell leukemia homeobox 1                                                                                                              | BG070361  | 7.8245  | 5.7515  | 2.0729 |
| 1451977_at   | Dyrk1a        | dual-specificity tyrosine-(Y)-phosphorylation regulated kinase 1a                                                                           | U58497    | 7.7961  | 5.7245  | 2.0716 |
| 1419044_at   | Cntnap4       | contactin associated protein-like 4                                                                                                         | NM_130457 | 5.7899  | 3.7192  | 2.0707 |
| 1437250_at   | Mreg          | melanoregulin                                                                                                                               | AV298358  | 5.3777  | 3.3086  | 2.0691 |
| 1447812_x_at | Finc          | filamin C, gamma                                                                                                                            | AV014577  | 9.1065  | 7.0377  | 2.0688 |
| 1442256_at   | Prkcd         | protein kinase C, delta                                                                                                                     | BB541041  | 7.7090  | 5.6402  | 2.0687 |
| 1460173_at   | Lasp1         | LIM and SH3 protein 1                                                                                                                       | BC010840  | 10.4004 | 8.3333  | 2.0670 |
| 1427009_at   | Lama5         | laminin, alpha 5                                                                                                                            | AV224009  | 8.5932  | 6.5268  | 2.0664 |
| 1429029_at   | Sgms2         | sphingomyelin synthase 2                                                                                                                    | AK016659  | 6.4243  | 4.3588  | 2.0656 |
| 1451456_at   | Hjrp          | Holliday junction recognition protein                                                                                                       | BC004768  | 9.0404  | 6.9758  | 2.0646 |
| 1437152_at   | Mex3b         | mex3 homolog B (C. elegans)                                                                                                                 | BG072837  | 6.8313  | 4.7675  | 2.0638 |
| 1422601_at   | Serpib9       | serine (or cysteine) peptidase inhibitor, clade B, member 9                                                                                 | NM_009256 | 7.2542  | 5.1918  | 2.0624 |
| 1456307_s_at | Adcy7         | adenylate cyclase 7                                                                                                                         | BB746807  | 10.3124 | 8.2505  | 2.0619 |
| 1448361_at   | Ttc3          | tetratricopeptide repeat domain 3                                                                                                           | BB833716  | 10.9565 | 8.8959  | 2.0605 |
| 1439794_at   | Ntn4          | netrin 4                                                                                                                                    | BQ086474  | 8.9929  | 6.9332  | 2.0597 |
| 1439830_at   | Map3k5        | mitogen-activated protein kinase kinase kinase 5                                                                                            | AV377656  | 6.3015  | 4.2427  | 2.0588 |
| 1424829_at   | A830007P12Rik | RIKEN cDNA A830007P12 gene                                                                                                                  | BC013092  | 8.0401  | 5.9820  | 2.0580 |
| 1426619_at   | Aim2          | absent in melanoma 2                                                                                                                        | BE685969  | 6.0351  | 3.9788  | 2.0563 |
| 1431028_a_at | Pank1         | pantothenate kinase 1                                                                                                                       | AK017345  | 7.3970  | 5.3414  | 2.0556 |



|              |               |                                                                           |           |         |        |        |
|--------------|---------------|---------------------------------------------------------------------------|-----------|---------|--------|--------|
| 1426600_at   | Slc2a1        | solute carrier family 2 (facilitated glucose transporter), member 1       | BM209618  | 9.2492  | 7.1941 | 2.0551 |
| 1427133_s_at | Lrp2          | low density lipoprotein receptor-related protein 2                        | C80829    | 5.4982  | 3.4443 | 2.0540 |
| 1460065_at   | AA763515      | expressed sequence AA763515                                               | BG071123  | 5.3169  | 3.2638 | 2.0531 |
| 1451753_at   | Plxna2        | plexin A2                                                                 | D86949    | 6.9720  | 4.9195 | 2.0525 |
| 1459552_at   | D4Bwg0951e    | DNA segment, Chr 4, Brigham & Women's Genetics 0951 expressed             | BB404047  | 5.4958  | 3.4443 | 2.0516 |
| 1429091_at   | 1600002K03Rik | RIKEN cDNA 1600002K03 gene                                                | BF682507  | 6.8234  | 4.7725 | 2.0509 |
| 1454048_a_at | 4931408A02Rik | RIKEN cDNA 4931408A02 gene                                                | AK016443  | 7.9620  | 5.9119 | 2.0501 |
| 1442325_at   | Tbc1d24       | TBC1 domain family, member 24                                             | AA270038  | 6.2831  | 4.2333 | 2.0498 |
| 1418733_at   | Twist1        | twist homolog 1 (Drosophila)                                              | NM_011658 | 9.3246  | 7.2750 | 2.0497 |
| 1457779_at   | 1110046J04Rik | RIKEN cDNA 1110046J04 gene                                                | AV013305  | 7.9093  | 5.8632 | 2.0462 |
| 1427540_at   | Zwint         | ZW10 interactor                                                           | BC013559  | 8.2234  | 6.1775 | 2.0459 |
| 1427539_a_at | Zwint         | ZW10 interactor                                                           | BC013559  | 10.5267 | 8.4894 | 2.0373 |
| 1417933_at   | Igfbp6        | insulin-like growth factor binding protein 6                              | NM_008344 | 9.2824  | 7.2467 | 2.0357 |
| 1424052_at   | Thap4         | THAP domain containing 4                                                  | BC013538  | 9.9256  | 7.8907 | 2.0350 |
| 1441030_at   | Rai14         | retinoic acid induced 14                                                  | BB308974  | 6.5424  | 4.5075 | 2.0349 |
| 1460657_at   | Wnt10a        | wingless related MMTV integration site 10a                                | NM_009518 | 8.3723  | 6.3376 | 2.0347 |
| 1440874_at   | Slco5a1       | solute carrier organic anion transporter family, member 5A1               | BE686667  | 5.8689  | 3.8342 | 2.0347 |
| 1455342_at   | Prune2        | prune homolog 2 (Drosophila)                                              | BM232966  | 7.8721  | 5.8382 | 2.0339 |
| 1449391_at   | Zfp37         | zinc finger protein 37                                                    | NM_009554 | 6.1365  | 4.1035 | 2.0331 |
| 1458894_at   |               |                                                                           | BB404534  | 6.0015  | 3.9687 | 2.0328 |
| 1425553_s_at | Hip1r         | huntingtin interacting protein 1 related                                  | AA590970  | 8.4564  | 6.4242 | 2.0323 |
| 1430159_at   | 5830408C22Rik | RIKEN cDNA 5830408C22 gene                                                | BF658932  | 6.0642  | 4.0323 | 2.0319 |
| 1425612_at   | Cux1          | cut-like homeobox 1                                                       | AA023906  | 5.1786  | 3.1525 | 2.0261 |
| 1438061_at   | 4930523C07Rik | RIKEN cDNA 4930523C07 gene                                                | AV272196  | 5.9590  | 3.9335 | 2.0255 |
| 1426880_at   | Etl4          | enhancer trap locus 4                                                     | BM250266  | 6.6382  | 4.6127 | 2.0255 |
| 1450971_at   | Gadd45b       | growth arrest and DNA-damage-inducible 45 beta                            | AK010420  | 10.0943 | 8.0691 | 2.0252 |
| 1437833_at   | Ltbp3         | latent transforming growth factor beta binding protein 3                  | BB173900  | 6.3729  | 4.3493 | 2.0236 |
| 1451318_a_at | Lyn           | Yamaguchi sarcoma viral (v-yes-1) oncogene homolog                        | M57697    | 8.6779  | 6.6564 | 2.0215 |
| 1438590_at   | Rapgef3       | Rap guanine nucleotide exchange factor (GEF) 3                            | BB280100  | 6.6079  | 4.5865 | 2.0214 |
| 1418114_at   | Rbpj          | recombination signal binding protein for immunoglobulin kappa J region    | NM_009035 | 9.2851  | 7.2668 | 2.0183 |
| 1416067_at   | Ifrd1         | interferon-related developmental regulator 1                              | NM_013562 | 11.7474 | 9.7294 | 2.0180 |
| 1421291_at   | Il18rap       | interleukin 18 receptor accessory protein                                 | NM_010553 | 6.5729  | 4.5566 | 2.0163 |
| 1460579_at   | Dnpep         | aspartyl aminopeptidase                                                   | BQ085436  | 6.5881  | 4.5719 | 2.0161 |
| 1428547_at   | Nt5e          | 5' nucleotidase, ecto                                                     | AV273591  | 5.8720  | 3.8602 | 2.0118 |
| 1454731_at   | Myo10         | myosin X                                                                  | BB794772  | 9.5715  | 7.5626 | 2.0089 |
| 1434858_x_at | Zfp511        | zinc finger protein 511                                                   | BQ178976  | 6.2582  | 4.2507 | 2.0075 |
| 1460589_at   | Zfp597        | zinc finger protein 597                                                   | AV270881  | 6.3015  | 4.2966 | 2.0049 |
| 1420342_at   |               |                                                                           | NM_010268 | 8.2802  | 6.2774 | 2.0028 |
| 1416753_at   | Prkar1b       | protein kinase, cAMP dependent regulatory, type I beta                    | NM_008923 | 8.1611  | 6.1607 | 2.0004 |
| 1426241_a_at | Scmh1         | sex comb on midleg homolog 1                                              | AB030906  | 8.0272  | 6.0270 | 2.0002 |
| 1451461_a_at | Aldoc         | aldolase C, fructose-bisphosphate                                         | BC008184  | 11.0212 | 9.0248 | 1.9964 |
| 1421340_at   | Map3k5        | mitogen-activated protein kinase kinase kinase 5                          | NM_008580 | 5.4397  | 3.4443 | 1.9954 |
| 1435234_at   | Ncoa2         | nuclear receptor coactivator 2                                            | BM234716  | 8.2023  | 6.2086 | 1.9937 |
| 1438130_at   | Taf15         | TAF15 RNA polymerase II, TATA box binding protein (TBP)-associated factor | BB427389  | 9.3999  | 7.4083 | 1.9916 |
| 1421225_a_at | Slc4a4        | solute carrier family 4 (anion exchanger), member 4                       | NM_018760 | 6.0270  | 4.0372 | 1.9898 |
| 1427429_at   | Csf2          | colony stimulating factor 2 (granulocyte-macrophage)                      | X03019    | 5.9590  | 3.9701 | 1.9889 |
| 1446130_at   | Mir1931       | microRNA 1931                                                             | AW557530  | 6.0777  | 4.0903 | 1.9874 |
| 1431074_a_at | Pitpnc1       | phosphatidylinositol transfer protein, cytoplasmic 1                      | BI654600  | 7.1485  | 5.1612 | 1.9873 |
| 1428523_at   | Lphn3         | latrophilin 3                                                             | BE945410  | 6.1404  | 4.1542 | 1.9862 |
| 1422101_at   | Tnfrsf23      | tumor necrosis factor receptor superfamily, member 23                     | NM_024290 | 6.2475  | 4.2617 | 1.9858 |

|              |               |                                                                                                                                             |           |         |         |        |
|--------------|---------------|---------------------------------------------------------------------------------------------------------------------------------------------|-----------|---------|---------|--------|
| 1422167_at   | Sema5a        | sema domain, seven thrombospondin repeats (type 1 and type 1-like), transmembrane domain (TM) and short cytoplasmic domain, (semaphorin) 5A | NM_009154 | 5.1383  | 3.1525  | 1.9858 |
| 1428983_at   | Scx           | scleraxis                                                                                                                                   | AW124134  | 7.4883  | 5.5038  | 1.9845 |
| 1432284_at   | Mipol1        | mirror-image polydactyly gene 1 homolog (human)                                                                                             | AK006974  | 7.1820  | 5.1986  | 1.9834 |
| 1416111_at   | Cd83          | CD83 antigen                                                                                                                                | NM_009856 | 5.8204  | 3.8371  | 1.9833 |
| 1424793_a_at | Pbp2          | phosphatidylethanolamine binding protein 2                                                                                                  | AF307146  | 6.3416  | 4.3588  | 1.9829 |
| 1418210_at   | Pfn2          | profilin 2                                                                                                                                  | NM_019410 | 12.8348 | 10.8555 | 1.9793 |
| 1456523_at   | Gm2115        | predicted gene 2115                                                                                                                         | BB767153  | 6.3376  | 4.3588  | 1.9789 |
| 1433909_at   | Syt17         | synaptotagmin XVII                                                                                                                          | AW048713  | 7.7541  | 5.7781  | 1.9760 |
| 1438802_at   | Foxp1         | forkhead box P1                                                                                                                             | BB021390  | 5.5812  | 3.6070  | 1.9742 |
| 1429028_at   | Dock11        | dedicator of cytokinesis 11                                                                                                                 | AK017170  | 10.1709 | 8.1973  | 1.9736 |
| 1431293_a_at | Cldn25        | claudin 25                                                                                                                                  | AK012260  | 10.2568 | 8.2836  | 1.9732 |
| 1428396_at   | Smurf1        | SMAD specific E3 ubiquitin protein ligase 1                                                                                                 | BB832916  | 7.2783  | 5.3054  | 1.9729 |
| 1417488_at   | Fosl1         | fos-like antigen 1                                                                                                                          | U34245    | 7.0690  | 5.0970  | 1.9720 |
| 1436999_at   | Pid1          | phosphotyrosine interaction domain containing                                                                                               | AI504908  | 6.1404  | 4.1689  | 1.9715 |
| 1451435_at   | Cux1          | cut-like homeobox 1                                                                                                                         | BC014289  | 8.3769  | 6.4073  | 1.9696 |
| 1418072_at   | Hist1h2bc     | histone cluster 1, H2bc                                                                                                                     | NM_023422 | 8.8240  | 6.8564  | 1.9676 |
| 1442383_at   |               |                                                                                                                                             | AW125215  | 6.9308  | 4.9657  | 1.9650 |
| 1437900_at   | 4930523C07Rik | RIKEN cDNA 4930523C07 gene                                                                                                                  | AV032877  | 7.6880  | 5.7245  | 1.9634 |
| 1455037_at   | Plxna2        | plexin A2                                                                                                                                   | BB002869  | 7.5239  | 5.5610  | 1.9629 |
| 1428881_at   | Klc1          | kinesin light chain 1                                                                                                                       | AK014256  | 9.8453  | 7.8839  | 1.9614 |
| 1418383_at   | Apcdd1        | adenomatous polyposis coli down-regulated 1                                                                                                 | BB770932  | 5.6109  | 3.6495  | 1.9613 |
| 1428025_s_at | Pitpnc1       | phosphatidylinositol transfer protein, cytoplasmic 1                                                                                        | BC028271  | 5.5405  | 3.5815  | 1.9590 |
| 1416206_at   | Sipa1         | signal-induced proliferation associated gene 1                                                                                              | D11374    | 8.0359  | 6.0777  | 1.9582 |
| 1417214_at   | Rab27b        | RAB27b, member RAS oncogene family                                                                                                          | BB121269  | 5.3374  | 3.3798  | 1.9576 |
| 1421140_a_at | Foxp1         | forkhead box P1                                                                                                                             | BG962849  | 9.6250  | 7.6690  | 1.9560 |
| 1442014_at   |               |                                                                                                                                             | BB531645  | 7.9235  | 5.9692  | 1.9543 |
| 1424529_s_at | Cgref1        | cell growth regulator with EF hand domain 1                                                                                                 | BC023116  | 7.5649  | 5.6110  | 1.9539 |
| 1437626_at   | Zfp36l2       | zinc finger protein 36, C3H type-like 2                                                                                                     | BB031791  | 11.7242 | 9.7718  | 1.9523 |
| 1429624_at   | Sltm          | SAFB-like, transcription modulator                                                                                                          | BG068009  | 10.8613 | 8.9095  | 1.9517 |
| 1425911_a_at | Fgfr1         | fibroblast growth factor receptor 1                                                                                                         | M65053    | 6.5624  | 4.6127  | 1.9497 |
| 1425611_a_at | Cux1          | cut-like homeobox 1                                                                                                                         | AA023906  | 7.7858  | 5.8382  | 1.9476 |
| 1423581_at   | Nmt2          | N-myristoyltransferase 2                                                                                                                    | AI503912  | 9.2653  | 7.3202  | 1.9451 |
| 1445181_at   | Em5           | echinoderm microtubule associated protein like 5                                                                                            | BM225233  | 7.4433  | 5.4985  | 1.9448 |
| 1451950_a_at | Cd80          | CD80 antigen                                                                                                                                | D16220    | 6.2831  | 4.3404  | 1.9427 |
| 1452609_at   | 1190005I06Rik | RIKEN cDNA 1190005I06 gene                                                                                                                  | BI133691  | 7.3534  | 5.4108  | 1.9426 |
| 1416482_at   | Ttc3          | tetratricopeptide repeat domain 3                                                                                                           | BB833716  | 7.7805  | 5.8382  | 1.9424 |
| 1424471_at   | Rapgef3       | Rap guanine nucleotide exchange factor (GEF) 3                                                                                              | BC020532  | 9.1137  | 7.1729  | 1.9408 |
| 1443354_at   |               |                                                                                                                                             | BB204151  | 5.5798  | 3.6409  | 1.9389 |
| 1454795_at   | Cobl1         | Cobl-like 1                                                                                                                                 | AV080881  | 9.2805  | 7.3417  | 1.9388 |
| 1448541_at   | Klc1          | kinesin light chain 1                                                                                                                       | AU079968  | 6.5371  | 4.5997  | 1.9374 |
| 1458742_at   | Lphn3         | latrophilin 3                                                                                                                               | BB317079  | 5.7245  | 3.7880  | 1.9365 |
| 1419705_at   | Car5b         | carbonic anhydrase 5b, mitochondrial                                                                                                        | NM_019513 | 8.5894  | 6.6564  | 1.9330 |
| 1449941_at   | Myo1e         | myosin IE                                                                                                                                   | NM_025612 | 7.5496  | 5.6190  | 1.9307 |
| 1416484_at   | Ttc3          | tetratricopeptide repeat domain 3                                                                                                           | BB833716  | 8.3846  | 6.4574  | 1.9272 |
| 1439104_at   | C230081A13Rik | RIKEN cDNA C230081A13 gene                                                                                                                  | BQ030909  | 8.0043  | 6.0777  | 1.9266 |
| 1450017_at   | Ccng1         | cyclin G1                                                                                                                                   | BG065754  | 8.9548  | 7.0284  | 1.9264 |
| 1417040_a_at | Bok           | BCL2-related ovarian killer protein                                                                                                         | NM_016778 | 9.7706  | 7.8447  | 1.9259 |
| 1428330_at   | Dopey2        | dopey family member 2                                                                                                                       | AK012087  | 6.4207  | 4.4964  | 1.9243 |
| 1420911_a_at | Mfge8         | milk fat globule-EGF factor 8 protein                                                                                                       | NM_008594 | 10.7827 | 8.8597  | 1.9230 |
| 1443314_at   | 2410042D21Rik | RIKEN cDNA 2410042D21 gene                                                                                                                  | BB417293  | 7.8961  | 5.9741  | 1.9219 |
| 1418296_at   | Fxyd5         | FXYD domain-containing ion transport regulator 5                                                                                            | NM_008761 | 9.0220  | 7.1002  | 1.9218 |
| 1452251_at   | Nbea          | neurobeachin                                                                                                                                | AA986379  | 8.8304  | 6.9094  | 1.9210 |
| 1441749_at   | 4930447F24Rik | RIKEN cDNA 4930447F24 gene                                                                                                                  | BB796499  | 8.2254  | 6.3076  | 1.9178 |
| 1422544_at   | Myo10         | myosin X                                                                                                                                    | AV297945  | 8.4742  | 6.5578  | 1.9164 |
| 1449209_a_at | Rdh11         | retinol dehydrogenase 11                                                                                                                    | AB030503  | 9.4674  | 7.5511  | 1.9163 |
| 1428801_at   | Mgat3         | mannoside acetylglucosaminyltransferase 3                                                                                                   | BB283751  | 7.1910  | 5.2754  | 1.9157 |
| 1437759_at   | Pfkip         | phosphofructokinase, platelet                                                                                                               | AV343511  | 6.3376  | 4.4293  | 1.9083 |

|              |              |                                                                           |           |         |        |        |
|--------------|--------------|---------------------------------------------------------------------------|-----------|---------|--------|--------|
| 1424470_a_at | Rapgef3      | Rap guanine nucleotide exchange factor (GEF)<br>3                         | BC020532  | 8.4117  | 6.5044 | 1.9073 |
| 1416503_at   | Lxn          | latexin                                                                   | NM_016753 | 11.5515 | 9.6448 | 1.9067 |
| 1457552_at   | Zfp295       | zinc finger protein 295                                                   | BB482373  | 7.8162  | 5.9119 | 1.9044 |
| 1419651_at   | Nkain1       | Na+/K+ transporting ATPase interacting 1                                  | AK009389  | 7.0937  | 5.1918 | 1.9019 |
| 1434582_at   | Erc2         | ELKS/RAB6-interacting/CAST family member 2                                | AV173869  | 5.8041  | 3.9024 | 1.9017 |
| 1427717_at   | Cd80         | CD80 antigen                                                              | X60958    | 5.2145  | 3.3131 | 1.9014 |
| 1458832_at   |              |                                                                           | BB364131  | 5.5091  | 3.6135 | 1.8956 |
| 1451566_at   | Zfp810       | zinc finger protein 810                                                   | BC005471  | 5.3394  | 3.4443 | 1.8952 |
| 1436820_at   | Kctd11       | potassium channel tetramerisation domain<br>containing 11                 | BB826401  | 8.5884  | 6.6941 | 1.8943 |
| 1458241_at   |              |                                                                           | BM055681  | 8.0105  | 6.1166 | 1.8940 |
| 1442453_at   | Fcho2        | FCH domain only 2                                                         | BM224404  | 8.3004  | 6.4073 | 1.8931 |
| 1417730_at   | Ext1         | exostoses (multiple) 1                                                    | NM_010162 | 10.8857 | 8.9959 | 1.8898 |
| 1448355_at   | Prss16       | protease, serine, 16 (thymus)                                             | NM_019429 | 6.9835  | 5.0970 | 1.8865 |
| 1430165_at   | Stk17b       | serine/threonine kinase 17b (apoptosis-<br>inducing)                      | AI661948  | 6.2831  | 4.3997 | 1.8834 |
| 1451006_at   | Xdh          | xanthine dehydrogenase                                                    | AV286265  | 6.2831  | 4.3997 | 1.8834 |
| 1421153_at   | Loxl4        | lysyl oxidase-like 4                                                      | NM_053083 | 6.7532  | 4.8719 | 1.8813 |
| 1428186_at   | Kctd6        | potassium channel tetramerisation domain<br>containing 6                  | AK017384  | 9.1212  | 7.2399 | 1.8813 |
| 1452635_x_at | Taf1d        | TATA box binding protein (Tbp)-associated<br>factor, RNA polymerase I, D  | AU044383  | 9.2491  | 7.3706 | 1.8786 |
| 1429184_at   | Gvin1        | GTPase, very large interferon inducible 1                                 | BM243571  | 8.4299  | 6.5528 | 1.8771 |
| 1450852_s_at | F2r          | coagulation factor II (thrombin) receptor                                 | BQ173958  | 11.6994 | 9.8236 | 1.8758 |
| 1439207_at   | Pnma5        | paraneoplastic antigen family 5                                           | BB698563  | 5.7099  | 3.8342 | 1.8757 |
| 1422138_at   | Plau         | plasminogen activator, urokinase                                          | NM_008873 | 6.0270  | 4.1557 | 1.8713 |
| 1455604_at   | Fzd5         | frizzled homolog 5 (Drosophila)                                           | BB795235  | 7.8721  | 6.0047 | 1.8674 |
| 1458722_at   |              |                                                                           | AW550819  | 7.0976  | 5.2306 | 1.8670 |
| 1435245_at   | Gls2         | glutaminase 2 (liver, mitochondrial)                                      | AI195532  | 6.7217  | 4.8549 | 1.8668 |
| 1449328_at   | Ly75         | lymphocyte antigen 75                                                     | NM_013825 | 8.9243  | 7.0575 | 1.8667 |
| 1441973_at   | Zfp295       | zinc finger protein 295                                                   | BB091040  | 6.4791  | 4.6127 | 1.8664 |
| 1416406_at   | Pea15a       | phosphoprotein enriched in astrocytes 15A                                 | AI323543  | 8.1979  | 6.3316 | 1.8663 |
| 1417293_at   | Hs6st1       | heparan sulfate 6-O-sulfotransferase 1                                    | NM_015818 | 8.4860  | 6.6240 | 1.8620 |
| 1417982_at   | Insig2       | insulin induced gene 2                                                    | AV257512  | 9.6110  | 7.7496 | 1.8614 |
| 1421045_at   | Mrc2         | mannose receptor, C type 2                                                | BB528408  | 7.5570  | 5.6970 | 1.8600 |
| 1421924_at   | Slc2a3       | solute carrier family 2 (facilitated glucose<br>transporter), member 3    | M75135    | 6.7217  | 4.8616 | 1.8600 |
| 1456189_x_at | Ltbp3        | latent transforming growth factor beta binding<br>protein 3               | BB173900  | 6.0270  | 4.1689 | 1.8581 |
| 1460599_at   | Ermp1        | endoplasmic reticulum metalloproteinase 1                                 | BB372567  | 7.5356  | 5.6781 | 1.8575 |
| 1424334_at   | Tspan17      | tetraspanin 17                                                            | BC010346  | 6.8852  | 5.0282 | 1.8570 |
| 1447754_x_at | Thap4        | THAP domain containing 4                                                  | BB130418  | 10.0620 | 8.2072 | 1.8547 |
| 1436897_at   | Mfhas1       | malignant fibrous histiocytoma amplified<br>sequence 1                    | BE225764  | 8.8304  | 6.9758 | 1.8545 |
| 1439773_at   | Ly6e         | lymphocyte antigen 6 complex, locus E                                     | BI408205  | 8.4159  | 6.5614 | 1.8545 |
| 1456422_at   | Dennd5b      | DENN/MADD domain containing 5B                                            | AV276849  | 5.5737  | 3.7192 | 1.8545 |
| 1437635_at   |              |                                                                           | AW146002  | 10.1602 | 8.3063 | 1.8539 |
| 1436697_at   |              |                                                                           | AV303202  | 6.1770  | 4.3243 | 1.8527 |
| 1450827_at   | Kif23        | kinesin family member 23                                                  | NM_024245 | 5.6402  | 3.7880 | 1.8523 |
| 1454906_at   | Rarb         | retinoic acid receptor, beta                                              | BB266455  | 5.6402  | 3.7880 | 1.8523 |
| 1441997_at   | Zfp184       | zinc finger protein 184 (Kruppel-like)                                    | BB129967  | 6.3481  | 4.4990 | 1.8491 |
| 1456655_at   | LOC100505027 | uncharacterized LOC100505027                                              | BM231698  | 9.5576  | 7.7087 | 1.8490 |
| 1452385_at   | Usp53        | ubiquitin specific peptidase 53                                           | BG076275  | 8.0850  | 6.2392 | 1.8458 |
| 1434699_at   | G2e3         | G2/M-phase specific E3 ubiquitin ligase                                   | BM123748  | 9.5610  | 7.7178 | 1.8432 |
| 1454896_at   | Rbpj         | recombination signal binding protein for<br>immunoglobulin kappa J region | BM235554  | 11.3525 | 9.5106 | 1.8419 |
| 1457788_at   | Rassf1       | Ras association (RalGDS/AF-6) domain family<br>member 1                   | BB385028  | 6.7601  | 4.9195 | 1.8406 |
| 1437486_at   | Gprc5a       | G protein-coupled receptor, family C, group 5,<br>member A                | BG064659  | 7.9950  | 6.1547 | 1.8403 |
| 1421926_at   | Mapk11       | mitogen-activated protein kinase 11                                       | AV329330  | 6.9689  | 5.1289 | 1.8400 |
| 1449168_a_at |              |                                                                           | BC003735  | 9.2699  | 7.4308 | 1.8391 |
| 1456387_at   | Nol4         | nucleolar protein 4                                                       | AV323033  | 5.6689  | 3.8342 | 1.8346 |
| 1456337_at   | Arap2        | ArfGAP with RhoGAP domain, ankyrin repeat<br>and PH domain 2              | AV291818  | 5.8877  | 4.0541 | 1.8336 |

|              |               |                                                                                  |           |         |         |        |
|--------------|---------------|----------------------------------------------------------------------------------|-----------|---------|---------|--------|
| 1435743_at   | Klhl23        | kelch-like 23 (Drosophila)                                                       | AW548377  | 7.1586  | 5.3257  | 1.8329 |
| 1424938_at   | Steap1        | six transmembrane epithelial antigen of the prostate 1                           | AF297098  | 9.2091  | 7.3768  | 1.8323 |
| 1437775_at   | Dlst          | dihydrolipoamide S-succinyltransferase (E2 component of 2-oxo-glutarate complex) | BB343361  | 7.0967  | 5.2685  | 1.8282 |
| 1422537_a_at | Id2           | inhibitor of DNA binding 2                                                       | NM_010496 | 10.0203 | 8.1924  | 1.8279 |
| 1455768_at   | Npc2          | Niemann Pick type C2                                                             | BG071996  | 7.6454  | 5.8189  | 1.8265 |
| 1430025_at   | Ppp3cc        | protein phosphatase 3, catalytic subunit, gamma isoform                          | AK015002  | 7.4072  | 5.5812  | 1.8260 |
| 1430448_at   | 6720418B01Rik | RIKEN cDNA 6720418B01 gene                                                       | BB392953  | 5.5746  | 3.7491  | 1.8255 |
| 1433451_at   | Cdk5r1        | cyclin-dependent kinase 5, regulatory subunit 1 (p35)                            | BB177836  | 7.3238  | 5.4985  | 1.8253 |
| 1438221_at   |               |                                                                                  | AI875682  | 9.0257  | 7.2050  | 1.8207 |
| 1417790_at   | Dok1          | docking protein 1                                                                | BC013066  | 9.6179  | 7.7979  | 1.8200 |
| 1451722_s_at | Smyd5         | SET and MYND domain containing 5                                                 | BF160651  | 8.7410  | 6.9213  | 1.8197 |
| 1447807_s_at | Plekhh1       | pleckstrin homology domain containing, family H (with MyTH4 domain) member 1     | AV336001  | 6.9835  | 5.1653  | 1.8182 |
| 1430634_a_at | Pfkip         | phosphofructokinase, platelet                                                    | BB076574  | 7.4069  | 5.5891  | 1.8178 |
| 1425522_at   | Rbm25         | RNA binding motif protein 25                                                     | BI106967  | 6.0489  | 4.2333  | 1.8156 |
| 1457390_at   |               |                                                                                  | BG069557  | 6.7345  | 4.9195  | 1.8150 |
| 1452483_a_at | Cd44          | CD44 antigen                                                                     | X66083    | 10.1330 | 8.3199  | 1.8131 |
| 1440293_at   | C230081A13Rik | RIKEN cDNA C230081A13 gene                                                       | BB821275  | 6.4242  | 4.6127  | 1.8114 |
| 1416118_at   | Trim59        | tripartite motif-containing 59                                                   | NM_025863 | 10.9461 | 9.1349  | 1.8112 |
| 1425362_at   | Agfg2         | ArfGAP with FG repeats 2                                                         | BC003330  | 7.2842  | 5.4743  | 1.8099 |
| 1435880_at   | Ankrd50       | ankyrin repeat domain 50                                                         | BM119343  | 9.3555  | 7.5472  | 1.8083 |
| 1418476_at   | Crif1         | cytokine receptor-like factor 1                                                  | NM_018827 | 10.1851 | 8.3771  | 1.8080 |
| 1449084_s_at | Sh3d19        | SH3 domain protein D19                                                           | NM_012059 | 10.2708 | 8.4631  | 1.8077 |
| 1452696_a_at | 4933439C10Rik | RIKEN cDNA 4933439C10 gene                                                       | AK017115  | 7.7379  | 5.9357  | 1.8023 |
| 1426095_a_at | Tnfrsf22      | tumor necrosis factor receptor superfamily, member 22                            | AY046551  | 6.6564  | 4.8556  | 1.8008 |
| 1416754_at   | Prkar1b       | protein kinase, cAMP dependent regulatory, type I beta                           | NM_008923 | 6.2005  | 4.4010  | 1.7995 |
| 1420827_a_at | Ccng1         | cyclin G1                                                                        | BG065754  | 10.7067 | 8.9095  | 1.7972 |
| 1440285_at   | Ppp1r9a       | protein phosphatase 1, regulatory (inhibitor) subunit 9A                         | BF472950  | 5.1261  | 3.3299  | 1.7962 |
| 1455204_at   | Pitpnc1       | phosphatidylinositol transfer protein, cytoplasmic 1                             | BB305507  | 7.3768  | 5.5812  | 1.7956 |
| 1427914_a_at | Tceb1         | transcription elongation factor B (SIII), polypeptide 1                          | AI019214  | 12.2720 | 10.4776 | 1.7944 |
| 1418209_a_at | Pfn2          | profilin 2                                                                       | NM_019410 | 12.8635 | 11.0694 | 1.7941 |
| 1418715_at   | Pank1         | pantothenate kinase 1                                                            | BC023496  | 7.3238  | 5.5301  | 1.7937 |
| 1459354_at   |               |                                                                                  | AV264369  | 5.4108  | 3.6172  | 1.7937 |
| 1451532_s_at | Steap1        | six transmembrane epithelial antigen of the prostate 1                           | AF297098  | 10.0134 | 8.2218  | 1.7916 |
| 1435488_at   | Mthfd2l       | methylenetetrahydrofolate dehydrogenase (NADP+ dependent) 2-like                 | BB427289  | 8.5507  | 6.7594  | 1.7913 |
| 1437012_x_at | Rapgef3       | Rap guanine nucleotide exchange factor (GEF) 3                                   | BB226235  | 8.1809  | 6.3902  | 1.7908 |
| 1454769_at   | Tatdn2        | TatD DNase domain containing 2                                                   | BB314680  | 8.3319  | 6.5413  | 1.7906 |
| 1437201_at   | Lrrc4c        | leucine rich repeat containing 4C                                                | AV336083  | 5.5091  | 3.7192  | 1.7899 |
| 1417506_at   | Gmnn          | geminin                                                                          | NM_020567 | 11.4494 | 9.6604  | 1.7891 |
| 1453540_at   | 5430404G13Rik | RIKEN cDNA 5430404G13 gene                                                       | BM218780  | 5.0970  | 3.3086  | 1.7884 |
| 1438989_s_at | B130021B11Rik | RIKEN cDNA B130021B11 gene                                                       | BB386167  | 11.2626 | 9.4753  | 1.7873 |
| 1452593_a_at | Tceb1         | transcription elongation factor B (SIII), polypeptide 1                          | AI019214  | 6.2443  | 4.4597  | 1.7847 |
| 1443208_at   |               |                                                                                  | BB056087  | 5.9357  | 4.1514  | 1.7843 |
| 1456909_at   | Gpi1          | glucose phosphate isomerase 1                                                    | BF017016  | 8.6155  | 6.8313  | 1.7842 |
| 1419766_at   | Sik1          | salt inducible kinase 1                                                          | NM_010831 | 6.2418  | 4.4597  | 1.7822 |
| 1418741_at   | Itgb7         | integrin beta 7                                                                  | NM_013566 | 7.8087  | 6.0270  | 1.7817 |
| 1428730_at   | Krit1         | KRIT1, ankyrin repeat containing                                                 | BI793814  | 6.1542  | 4.3727  | 1.7814 |
| 1460341_at   | Plekhb2       | pleckstrin homology domain containing, family B (evectins) member 2              | AF189817  | 9.9052  | 8.1269  | 1.7783 |
| 1419161_a_at | Nox4          | NADPH oxidase 4                                                                  | AB041034  | 5.1539  | 3.3762  | 1.7778 |
| 1455870_at   | Akap2         | A kinase (PRKA) anchor protein 2                                                 | AI649048  | 9.5916  | 7.8151  | 1.7765 |
| 1415906_at   | Tmsb4x        | thymosin, beta 4, X chromosome                                                   | NM_021278 | 12.9423 | 11.1662 | 1.7762 |
| 1438954_x_at | Figf          | c-fos induced growth factor                                                      | BB359521  | 6.5477  | 4.7719  | 1.7758 |

|              |               |                                                                               |           |         |         |        |
|--------------|---------------|-------------------------------------------------------------------------------|-----------|---------|---------|--------|
| 1419805_s_at | Ggps1         | geranylgeranyl diphosphate synthase 1                                         | C79210    | 8.2485  | 6.4737  | 1.7748 |
| 1433725_at   | Acvr1b        | activin A receptor, type 1B                                                   | BQ043509  | 9.8255  | 8.0510  | 1.7745 |
| 1449073_at   | Finc          | filamin C, gamma                                                              | NM_026839 | 8.2311  | 6.4574  | 1.7738 |
| 1438842_at   | Mtch2         | mitochondrial carrier homolog 2 (C. elegans)                                  | AV067008  | 5.6970  | 3.9251  | 1.7718 |
| 1456914_at   | Slc16a4       | solute carrier family 16 (monocarboxylic acid transporters), member 4         | AV231970  | 6.2582  | 4.4873  | 1.7709 |
| 1448326_a_at | Crabp1        | cellular retinoic acid binding protein I                                      | NM_013496 | 12.6049 | 10.8363 | 1.7686 |
| 1434279_at   |               |                                                                               | BG976607  | 8.6081  | 6.8415  | 1.7666 |
| 1449124_at   | Rgl1          | ral guanine nucleotide dissociation stimulator,-like 1                        | NM_016846 | 8.8360  | 7.0703  | 1.7657 |
| 1423877_at   | Chaf1b        | chromatin assembly factor 1, subunit B (p60)                                  | BC013532  | 8.7297  | 6.9643  | 1.7654 |
| 1417707_at   | N4bp2l1       | NEDD4 binding protein 2-like 1                                                | NM_133898 | 5.9820  | 4.2168  | 1.7653 |
| 1442834_at   |               |                                                                               | BG070476  | 5.8842  | 4.1205  | 1.7637 |
| 1426599_a_at | Slc2a1        | solute carrier family 2 (facilitated glucose transporter), member 1           | BM209618  | 11.1275 | 9.3646  | 1.7629 |
| 1440925_at   | Gm19773       | predicted gene, 19773                                                         | BG073024  | 6.9571  | 5.1946  | 1.7625 |
| 1434741_at   | Rreb1         | ras responsive element binding protein 1                                      | BB306052  | 6.1198  | 4.3588  | 1.7611 |
| 1460619_at   | Mfsd9         | major facilitator superfamily domain containing 9                             | AU067683  | 6.2200  | 4.4597  | 1.7603 |
| 1443254_at   |               |                                                                               | BB448273  | 5.6689  | 3.9089  | 1.7599 |
| 1433910_at   | Zcchc6        | zinc finger, CCHC domain containing 6                                         | BM208041  | 9.6944  | 7.9359  | 1.7585 |
| 1436589_x_at | Prkd2         | protein kinase D2                                                             | BB204677  | 7.1341  | 5.3765  | 1.7575 |
| 1450288_at   | Cdh6          | cadherin 6                                                                    | NM_007666 | 8.3304  | 6.5730  | 1.7573 |
| 1429778_at   | Optn          | optineurin                                                                    | AK015354  | 7.7109  | 5.9540  | 1.7569 |
| 1453864_at   | Rdh14         | retinol dehydrogenase 14 (all-trans and 9-cis)                                | AK014097  | 6.5424  | 4.7867  | 1.7557 |
| 1452939_a_at | Pitpnc1       | phosphatidylinositol transfer protein, cytoplasmic 1                          | AI595920  | 6.4327  | 4.6777  | 1.7550 |
| 1455405_at   | Pstpip2       | proline-serine-threonine phosphatase-interacting protein 2                    | AV229693  | 5.8877  | 4.1331  | 1.7546 |
| 1438781_at   | Tet2          | tet methylcytosine dioxygenase 2                                              | AU067701  | 7.5327  | 5.7781  | 1.7546 |
| 1420091_s_at | Morc3         | microorchidia 3                                                               | AI452146  | 9.4923  | 7.7384  | 1.7539 |
| 1423452_at   | Stk17b        | serine/threonine kinase 17b (apoptosis-inducing)                              | AV173139  | 9.7795  | 8.0272  | 1.7523 |
| 1442819_at   | Rhbdl2        | rhomboid, veinlet-like 2 (Drosophila)                                         | BM213778  | 6.0047  | 4.2539  | 1.7508 |
| 1421834_at   | Pip5k1b       | phosphatidylinositol-4-phosphate 5-kinase, type 1 beta                        | NM_008846 | 7.4742  | 5.7245  | 1.7496 |
| 1431032_at   | Agl           | amylase-1,6-glucosidase, 4-alpha-glucanotransferase                           | AA681807  | 8.8493  | 7.1002  | 1.7490 |
| 1415943_at   | Sdc1          | syndecan 1                                                                    | BI788645  | 10.1024 | 8.3564  | 1.7460 |
| 1434680_at   | Plekhg3       | pleckstrin homology domain containing, family G (with RhoGef domain) member 3 | BM208085  | 7.6809  | 5.9357  | 1.7453 |
| 1418250_at   | Arl4d         | ADP-ribosylation factor-like 4D                                               | NM_025404 | 7.7042  | 5.9590  | 1.7452 |
| 1416627_at   | Spint1        | serine protease inhibitor, Kunitz type 1                                      | NM_016907 | 5.7152  | 3.9701  | 1.7451 |
| 1434496_at   | Plk3          | polo-like kinase 3                                                            | BM947855  | 8.4893  | 6.7443  | 1.7450 |
| 1453286_at   | Plxna2        | plexin A2                                                                     | BB085537  | 6.9753  | 5.2306  | 1.7446 |
| 1460466_at   |               |                                                                               | BB824055  | 9.9390  | 8.1949  | 1.7442 |
| 1455121_at   | Lcor          | ligand dependent nuclear receptor corepressor                                 | BB553784  | 7.7253  | 5.9820  | 1.7432 |
| 1453308_at   | 8430429K09Rik | RIKEN cDNA 8430429K09 gene                                                    | AK018450  | 5.9119  | 4.1689  | 1.7430 |
| 1442257_at   |               |                                                                               | BI134319  | 8.9468  | 7.2050  | 1.7418 |
| 1437070_at   | Cdc14b        | CDC14 cell division cycle 14B                                                 | BB224362  | 9.5504  | 7.8087  | 1.7417 |
| 1456603_at   | Fam101b       | family with sequence similarity 101, member B                                 | BG070087  | 7.6525  | 5.9119  | 1.7407 |
| 1456652_at   | Dtl           | denticleless homolog (Drosophila)                                             | BB293562  | 8.2135  | 6.4737  | 1.7398 |
| 1425767_a_at | Six4          | sine oculis-related homeobox 4                                                | D50416    | 8.3672  | 6.6275  | 1.7397 |
| 1455470_x_at | Lasp1         | LIM and SH3 protein 1                                                         | AV027151  | 11.4323 | 9.6927  | 1.7396 |
| 1450977_s_at | Ndrp1         | N-myc downstream regulated gene 1                                             | AI987929  | 7.8790  | 6.1404  | 1.7386 |
| 1418460_at   | Sh3d19        | SH3 domain protein D19                                                        | NM_012059 | 6.7928  | 5.0544  | 1.7384 |
| 1453008_at   | Trnp1         | TMF1-regulated nuclear protein 1                                              | AK009004  | 8.5436  | 6.8055  | 1.7380 |
| 1418160_at   | Mkrn3         | makorin, ring finger protein, 3                                               | NM_011746 | 5.5258  | 3.7880  | 1.7378 |
| 1431033_x_at | Agl           | amylase-1,6-glucosidase, 4-alpha-glucanotransferase                           | AA681807  | 9.1460  | 7.4083  | 1.7377 |
| 1425319_s_at | Snrnp48       | small nuclear ribonucleoprotein 48 (U11/U12)                                  | BC021443  | 9.4417  | 7.7042  | 1.7375 |
| 1438953_at   | Figf          | c-fos induced growth factor                                                   | BB359521  | 6.6564  | 4.9195  | 1.7370 |
| 1452061_s_at | Strbp         | spermatid perinuclear RNA binding protein                                     | AK006314  | 10.0161 | 8.2802  | 1.7359 |
| 1426411_a_at | Strbp         | spermatid perinuclear RNA binding protein                                     | AK006314  | 8.0056  | 6.2707  | 1.7350 |
| 1420891_at   | Wnt7b         | wingless-related MMTV integration site 7B                                     | W29605    | 6.2041  | 4.4702  | 1.7339 |
| 1421923_at   | Sh3bp5        | SH3-domain binding protein 5 (BTK-associated)                                 | BQ179335  | 8.1389  | 6.4073  | 1.7316 |
| 1455242_at   | Foxp1         | forkhead box P1                                                               | BM220880  | 9.5231  | 7.7919  | 1.7312 |

|              |               |                                                                        |           |         |         |        |
|--------------|---------------|------------------------------------------------------------------------|-----------|---------|---------|--------|
| 1439753_x_at | Six4          | sine oculis-related homeobox 4                                         | AI893638  | 8.8303  | 7.1002  | 1.7301 |
| 1431377_at   | Atxn10        | ataxin 10                                                              | AK013742  | 7.2935  | 5.5663  | 1.7272 |
| 1422638_s_at | Rassf5        | Ras association (RalGDS/AF-6) domain family member 5                   | NM_018750 | 6.2831  | 4.5566  | 1.7265 |
| 1435947_at   | Ptar1         | protein prenyltransferase alpha subunit repeat containing 1            | BQ175669  | 8.8005  | 7.0740  | 1.7265 |
| 1416480_a_at |               |                                                                        | NM_019814 | 11.9098 | 10.1847 | 1.7251 |
| 1425268_a_at | Pear1         | platelet endothelial aggregation receptor 1                            | BB752266  | 6.6446  | 4.9195  | 1.7251 |
| 1441274_at   |               |                                                                        | BB283974  | 7.0299  | 5.3054  | 1.7245 |
| 1434951_at   | Armc8         | armadillo repeat containing 8                                          | BE995635  | 8.3946  | 6.6707  | 1.7240 |
| 1449553_at   | Nkain1        | Na <sup>+</sup> /K <sup>+</sup> transporting ATPase interacting 1      | AK009389  | 9.5100  | 7.7871  | 1.7229 |
| 1431667_s_at | Efcab11       | EF-hand calcium binding domain 11                                      | AK011836  | 6.9608  | 5.2381  | 1.7227 |
| 1443603_at   |               |                                                                        | BB213784  | 5.1596  | 3.4379  | 1.7216 |
| 1426002_a_at | Cdc7          | cell division cycle 7 ( <i>S. cerevisiae</i> )                         | AB018574  | 9.8810  | 8.1595  | 1.7214 |
| 1435222_at   | Foxp1         | forkhead box P1                                                        | BM220880  | 10.0922 | 8.3720  | 1.7202 |
| 1441684_at   | Ttc3          | tetratricopeptide repeat domain 3                                      | BM116591  | 5.8297  | 4.1099  | 1.7198 |
| 1418049_at   | Ltbp3         | latent transforming growth factor beta binding protein 3               | NM_008520 | 10.1007 | 8.3832  | 1.7176 |
| 1435556_at   | Zfp597        | zinc finger protein 597                                                | AV270881  | 7.5664  | 5.8489  | 1.7175 |
| 1423836_at   | Zfp503        | zinc finger protein 503                                                | BB447914  | 5.8735  | 4.1573  | 1.7162 |
| 1445862_at   | Marf1         | meiosis arrest female 1                                                | BB123487  | 7.9260  | 6.2123  | 1.7138 |
| 1451382_at   | Chac1         | ChaC, cation transport regulator 1                                     | BC025169  | 9.6661  | 7.9531  | 1.7131 |
| 1460048_at   | Zdhhc13       | zinc finger, DHHC domain containing 13                                 | BB462453  | 5.2427  | 3.5303  | 1.7124 |
| 1435364_at   | Cyhr1         | cysteine and histidine rich 1                                          | BB323901  | 10.2069 | 8.4960  | 1.7108 |
| 1418778_at   | Ccdc109b      | coiled-coil domain containing 109B                                     | NM_025779 | 9.9690  | 8.2584  | 1.7106 |
| 1416598_at   | Glis2         | GLIS family zinc finger 2                                              | NM_031184 | 8.9094  | 7.1996  | 1.7099 |
| 1421299_a_at | Lef1          | lymphoid enhancer binding factor 1                                     | NM_010703 | 5.4275  | 3.7192  | 1.7083 |
| 1457915_at   | 4833442J19Rik | RIKEN cDNA 4833442J19 gene                                             | AV288616  | 6.5907  | 4.8830  | 1.7076 |
| 1422612_at   | Hk2           | hexokinase 2                                                           | NM_013820 | 10.1447 | 8.4383  | 1.7065 |
| 1448957_at   | Rbpj          | recombination signal binding protein for immunoglobulin kappa J region | NM_009035 | 9.8216  | 8.1166  | 1.7050 |
| 1456257_at   |               |                                                                        | BG070093  | 8.3989  | 6.6941  | 1.7049 |
| 1438253_at   | Ssh1          | slingshot homolog 1 ( <i>Drosophila</i> )                              | BE954973  | 6.7580  | 5.0544  | 1.7035 |
| 1448568_a_at | Slc20a1       | solute carrier family 20, member 1                                     | NM_015747 | 10.4545 | 8.7511  | 1.7034 |
| 1427005_at   | Plk2          | polo-like kinase 2                                                     | BM234765  | 10.2206 | 8.5178  | 1.7028 |
| 1428990_at   | 2310047K21Rik | RIKEN cDNA 2310047K21 gene                                             | BE946575  | 7.2147  | 5.5140  | 1.7007 |
| 1437558_at   | B130021B11Rik | RIKEN cDNA B130021B11 gene                                             | BM119919  | 9.5069  | 7.8067  | 1.7002 |
| 1440966_at   | 7-Mar         | membrane-associated ring finger (C3HC4) 7                              | BB248730  | 7.5840  | 5.8851  | 1.6990 |
| 1436613_at   | Coro6         | coronin 6                                                              | AI507196  | 5.6689  | 3.9701  | 1.6988 |
| 1433471_at   | Tcf7          | transcription factor 7, T cell specific                                | AI323642  | 8.4201  | 6.7227  | 1.6975 |
| 1455646_at   | 2010004M13Rik | RIKEN cDNA 2010004M13 gene                                             | BI904583  | 6.2298  | 4.5325  | 1.6973 |
| 1434949_at   | Armc8         | armadillo repeat containing 8                                          | BE995635  | 8.9058  | 7.2088  | 1.6969 |
| 1424088_at   | Myg1          | melanocyte proliferating gene 1                                        | AF289484  | 10.2190 | 8.5231  | 1.6959 |
| 1438123_at   | Gm10033       | predicted gene 10033                                                   | BB762627  | 6.1540  | 4.4597  | 1.6943 |
| 1417662_at   | Elk3          | ELK3, member of ETS oncogene family                                    | BC005686  | 6.8186  | 5.1247  | 1.6939 |
| 1441375_at   |               |                                                                        | AU043080  | 5.0021  | 3.3086  | 1.6935 |
| 1437460_x_at | Rin1          | Ras and Rab interactor 1                                               | BB264363  | 7.0755  | 5.3820  | 1.6935 |
| 1422168_a_at | Bdnf          | brain derived neurotrophic factor                                      | AY057913  | 8.5270  | 6.8336  | 1.6934 |
| 1457232_at   | Fbxl21        | F-box and leucine-rich repeat protein 21                               | BE946365  | 5.4108  | 3.7192  | 1.6916 |
| 1436323_at   | 2810001A02Rik | RIKEN cDNA 2810001A02 gene                                             | BE952576  | 9.4211  | 7.7316  | 1.6895 |
| 1420136_a_at |               |                                                                        | AI427540  | 5.4443  | 3.7552  | 1.6891 |
| 1441573_at   | Scmh1         | sex comb on midleg homolog 1                                           | BB297140  | 5.7245  | 4.0372  | 1.6873 |
| 1440132_s_at | Prkar1b       | protein kinase, cAMP dependent regulatory, type I beta                 | BB283894  | 8.5438  | 6.8579  | 1.6859 |
| 1435679_at   | Optn          | optineurin                                                             | BB770843  | 8.2121  | 6.5268  | 1.6853 |
| 1442465_s_at | Strbp         | spermatid perinuclear RNA binding protein                              | AV377824  | 9.2758  | 7.5915  | 1.6843 |
| 1443296_at   | Cdk16         | cyclin-dependent kinase 16                                             | AW539955  | 5.8740  | 4.1897  | 1.6843 |
| 1456502_at   | Dyrk2         | dual-specificity tyrosine-(Y)-phosphorylation regulated kinase 2       | AI326418  | 7.4247  | 5.7424  | 1.6823 |
| 1424048_a_at | Cyb5r1        | cytochrome b5 reductase 1                                              | BC024618  | 10.0926 | 8.4105  | 1.6821 |
| 1449324_at   | Ero1l         | ERO1-like ( <i>S. cerevisiae</i> )                                     | BM234652  | 11.1782 | 9.4964  | 1.6818 |
| 1447861_x_at | Meis2         | Meis homeobox 2                                                        | AV329643  | 7.5689  | 5.8877  | 1.6812 |
| 1455760_at   | Slc9a5        | solute carrier family 9 (sodium/hydrogen exchanger), member 5          | BB749107  | 7.4584  | 5.7781  | 1.6803 |
| 1440353_at   | Ntf5          | neurotrophin 5                                                         | AI462899  | 5.2368  | 3.5570  | 1.6798 |
| 1449982_at   | Il11          | interleukin 11                                                         | NM_008350 | 6.9850  | 5.3054  | 1.6796 |

|              |               |                                                                     |           |         |         |        |
|--------------|---------------|---------------------------------------------------------------------|-----------|---------|---------|--------|
| 1448350_at   | Asl           | argininosuccinate lyase                                             | NM_133768 | 8.5770  | 6.8973  | 1.6796 |
| 1423633_at   | Snrnp48       | small nuclear ribonucleoprotein 48 (U11/U12)                        | BB703486  | 9.7169  | 8.0382  | 1.6787 |
| 1454734_at   | Lef1          | lymphoid enhancer binding factor 1                                  | AV156352  | 7.4942  | 5.8161  | 1.6781 |
| 1417750_a_at | Slc25a37      | solute carrier family 25, member 37                                 | NM_026331 | 10.0802 | 8.4026  | 1.6776 |
| 1445559_at   |               |                                                                     | BB762499  | 6.1291  | 4.4518  | 1.6773 |
| 1424443_at   | Tm6sf1        | transmembrane 6 superfamily member 1                                | AV378394  | 5.7781  | 4.1035  | 1.6746 |
| 1423186_at   | Tiam2         | T cell lymphoma invasion and metastasis 2                           | BM228957  | 8.3300  | 6.6564  | 1.6735 |
| 1434684_at   | Rin3          | Ras and Rab interactor 3                                            | AV338855  | 7.6999  | 6.0270  | 1.6729 |
| 1450410_a_at | Slc48a1       | solute carrier family 48 (heme transporter), member 1               | BC022913  | 10.2639 | 8.5916  | 1.6723 |
| 1429520_a_at | Acer3         | alkaline ceramidase 3                                               | BE573407  | 8.0956  | 6.4242  | 1.6714 |
| 1419385_a_at | Ubqln1        | ubiquilin 1                                                         | NM_026842 | 9.0299  | 7.3594  | 1.6705 |
| 1443394_at   |               |                                                                     | BG060698  | 7.4774  | 5.8070  | 1.6705 |
| 1429168_at   | Zbtb46        | zinc finger and BTB domain containing 46                            | AK011461  | 6.4731  | 4.8027  | 1.6704 |
| 1453345_at   | Nipal1        | NIPA-like domain containing 1                                       | AK014427  | 6.1198  | 4.4497  | 1.6701 |
| 1438972_x_at | 2810410L24Rik | RIKEN cDNA 2810410L24 gene                                          | BB493215  | 7.7740  | 6.1046  | 1.6694 |
| 1451475_at   | Plxnd1        | plexin D1                                                           | BC019530  | 8.2574  | 6.5881  | 1.6693 |
| 1434874_x_at | Acap1         | ArfGAP with coiled-coil, ankyrin repeat and PH domains 1            | BB115902  | 6.4409  | 4.7725  | 1.6684 |
| 1455740_at   | Hnrnpa1       | heterogeneous nuclear ribonucleoprotein A1                          | BE685966  | 8.4712  | 6.8048  | 1.6664 |
| 1429418_at   | Cdc14b        | CDC14 cell division cycle 14B                                       | AK013228  | 8.9901  | 7.3238  | 1.6663 |
| 1418872_at   | Abcb1b        | ATP-binding cassette, sub-family B (MDR/TAP), member 1B             | NM_011075 | 8.9864  | 7.3208  | 1.6656 |
| 1427385_s_at | Actn1         | actinin, alpha 1                                                    | BC003232  | 6.7880  | 5.1247  | 1.6633 |
| 1434302_at   |               |                                                                     | AV307311  | 8.5361  | 6.8733  | 1.6628 |
| 1434773_a_at | Slc2a1        | solute carrier family 2 (facilitated glucose transporter), member 1 | BM207588  | 11.1982 | 9.5360  | 1.6622 |
| 1435349_at   | Nrp2          | neuropilin 2                                                        | BB752129  | 10.5577 | 8.8957  | 1.6620 |
| 1436073_at   | A630007B06Rik | RIKEN cDNA A630007B06 gene                                          | BB370775  | 7.9771  | 6.3197  | 1.6574 |
| 1431305_at   | Mcoln1        | mucopolip 1                                                         | AA874645  | 5.8252  | 4.1689  | 1.6564 |
| 1418649_at   | Egln3         | EGL nine homolog 3 (C. elegans)                                     | BB284358  | 9.4880  | 7.8317  | 1.6563 |
| 1438285_at   | 2210015D19Rik | RIKEN cDNA 2210015D19 gene                                          | BM245369  | 6.9605  | 5.3054  | 1.6551 |
| 1436066_at   | Kalrn         | kalirin, RhoGEF kinase                                              | BI965477  | 5.0007  | 3.3456  | 1.6551 |
| 1422916_at   | Fgf21         | fibroblast growth factor 21                                         | NM_020013 | 5.8877  | 4.2333  | 1.6544 |
| 1438700_at   | Fbnp4         | formin binding protein 4                                            | BG091626  | 6.8313  | 5.1777  | 1.6536 |
| 1434333_a_at | Prkd2         | protein kinase D2                                                   | AW557946  | 6.3197  | 4.6662  | 1.6534 |
| 1444606_at   | Efna2         | ephrin A2                                                           | BB790825  | 7.2935  | 5.6402  | 1.6532 |
| 1458358_at   | Pank2         | pantothenate kinase 2                                               | BB402666  | 6.3015  | 4.6486  | 1.6529 |
| 1424005_at   | B230219D22Rik | RIKEN cDNA B230219D22 gene                                          | BC006718  | 11.2253 | 9.5734  | 1.6519 |
| 1459845_at   |               |                                                                     | AW558581  | 5.1383  | 3.4867  | 1.6517 |
| 1449197_at   | Wdr20a        | WD repeat domain 20A                                                | NM_027149 | 8.1609  | 6.5111  | 1.6498 |
| 1444777_at   | Rai14         | retinoic acid induced 14                                            | BB534392  | 6.5230  | 4.8738  | 1.6492 |
| 1439279_at   | 3110007F17Rik | RIKEN cDNA 3110007F17 gene                                          | AV339304  | 7.5356  | 5.8877  | 1.6479 |
| 1451723_at   | Cnot6l        | CCR4-NOT transcription complex, subunit 6-like                      | BC018506  | 7.7336  | 6.0866  | 1.6470 |
| 1423694_at   | Kctd10        | potassium channel tetramerisation domain containing 10              | BC006935  | 10.5727 | 8.9264  | 1.6463 |
| 1447020_at   |               |                                                                     | BB248611  | 5.3054  | 3.6600  | 1.6454 |
| 1420425_at   | Prdm1         | PR domain containing 1, with ZNF domain                             | NM_007548 | 5.3644  | 3.7192  | 1.6452 |
| 1449204_at   | Gjb5          | gap junction protein, beta 5                                        | NM_010291 | 5.6402  | 3.9955  | 1.6447 |
| 1415936_at   | Bcar3         | breast cancer anti-estrogen resistance 3                            | NM_013867 | 9.0204  | 7.3768  | 1.6435 |
| 1421008_at   | Rsad2         | radical S-adenosyl methionine domain containing 2                   | BB741897  | 10.9880 | 9.3448  | 1.6433 |
| 1426362_at   | Tmem144       | transmembrane protein 144                                           | AV306255  | 6.5111  | 4.8682  | 1.6429 |
| 1426719_at   | Apbb2         | amyloid beta (A4) precursor protein-binding, family B, member 2     | BG067463  | 9.8500  | 8.2072  | 1.6428 |
| 1460440_at   | Lphn3         | latrophilin 3                                                       | BE945410  | 6.9835  | 5.3414  | 1.6421 |
| 1437110_at   | 2810474O19Rik | RIKEN cDNA 2810474O19 gene                                          | BM232998  | 10.2247 | 8.5850  | 1.6396 |
| 1452817_at   | Smyd3         | SET and MYND domain containing 3                                    | AK010447  | 8.2266  | 6.5881  | 1.6385 |
| 1435675_at   | Tbc1d12       | TBC1D12: TBC1 domain family, member 12                              | BF228251  | 8.7560  | 7.1176  | 1.6384 |
| 1438634_x_at | Lasp1         | LIM and SH3 protein 1                                               | BB105164  | 12.1139 | 10.4763 | 1.6376 |
| 1460227_at   | Timp1         | tissue inhibitor of metalloproteinase 1                             | BC008107  | 12.2689 | 10.6317 | 1.6372 |
| 1435909_at   | C030034I22Rik | RIKEN cDNA C030034I22 gene                                          | AW986101  | 5.6071  | 3.9701  | 1.6370 |
| 1435108_at   | Arhgap22      | Rho GTPase activating protein 22                                    | BG295243  | 8.4251  | 6.7883  | 1.6368 |
| 1422847_a_at | Prkcd         | protein kinase C, delta                                             | AF251036  | 9.3849  | 7.7496  | 1.6353 |
| 1429772_at   | Plxna2        | plexin A2                                                           | BB085537  | 5.7655  | 4.1303  | 1.6352 |
| 1419884_at   |               |                                                                     | BF658463  | 6.3554  | 4.7207  | 1.6346 |

|              |               |                                                                             |           |         |        |        |
|--------------|---------------|-----------------------------------------------------------------------------|-----------|---------|--------|--------|
| 1453550_a_at | Far1          | fatty acyl CoA reductase 1                                                  | AK011187  | 6.6801  | 5.0464 | 1.6336 |
| 1437279_x_at | Sdc1          | syndecan 1                                                                  | BB533095  | 10.3972 | 8.7645 | 1.6327 |
| 1430144_at   | Avl9          | AVL9 homolog (S. cerevisiae)                                                | BB815600  | 5.6689  | 4.0372 | 1.6317 |
| 1424671_at   | Plekhf1       | pleckstrin homology domain containing, family F (with FYVE domain) member 1 | BC002120  | 9.7920  | 8.1609 | 1.6311 |
| 1424277_at   | Haus7         | HAUS augmin-like complex, subunit 7                                         | AY029337  | 9.9353  | 8.3063 | 1.6291 |
| 1417228_at   | Capn1         | calpain 1                                                                   | AF084459  | 8.3045  | 6.6766 | 1.6279 |
| 1444746_at   |               |                                                                             | BM195033  | 7.7674  | 6.1415 | 1.6258 |
| 1444418_at   | Itpr2         | inositol 1,4,5-triphosphate receptor 2                                      | BM225081  | 5.5282  | 3.9024 | 1.6258 |
| 1434827_at   | Thoc6         | THO complex 6 homolog (Drosophila)                                          | AW554543  | 8.9491  | 7.3238 | 1.6253 |
| 1424906_at   | Pqlc3         | PQ loop repeat containing                                                   | BC025220  | 8.2843  | 6.6594 | 1.6249 |
| 1456377_x_at | Limd2         | LIM domain containing 2                                                     | AV010467  | 10.8219 | 9.1994 | 1.6226 |
| 1456862_at   | Six4          | sine oculis-related homeobox 4                                              | AI893638  | 8.6903  | 7.0683 | 1.6220 |
| 1454309_at   | 2810002N01Rik | RIKEN cDNA 2810002N01 gene                                                  | BB646622  | 5.7245  | 4.1035 | 1.6210 |
| 1429764_at   | Fam101b       | family with sequence similarity 101, member B                               | BF101721  | 8.1926  | 6.5730 | 1.6196 |
| 1425012_at   | Gng5          | guanine nucleotide binding protein (G protein), gamma 5                     | BC010725  | 5.5002  | 3.8819 | 1.6183 |
| 1427287_s_at | Itpr2         | inositol 1,4,5-triphosphate receptor 2                                      | BB216794  | 7.9908  | 6.3729 | 1.6180 |
| 1431894_at   | Itrip         | inositol 1,4,5-triphosphate receptor interacting protein                    | AK014762  | 6.5824  | 4.9657 | 1.6167 |
| 1448742_at   | Snai1         | snail homolog 1 (Drosophila)                                                | NM_011427 | 5.5190  | 3.9024 | 1.6166 |
| 1425524_at   | Rbm25         | RNA binding motif protein 25                                                | BI106967  | 6.6707  | 5.0544 | 1.6162 |
| 1423280_at   | Stmn2         | stathmin-like 2                                                             | BM115022  | 6.7797  | 5.1653 | 1.6144 |
| 1452349_x_at |               |                                                                             | AI481797  | 11.2173 | 9.6040 | 1.6133 |
| 1448905_at   |               |                                                                             | NM_019730 | 7.5938  | 5.9820 | 1.6117 |
| 1425087_at   | 2310003F16Rik | RIKEN cDNA 2310003F16 gene                                                  | BC021588  | 5.6402  | 4.0292 | 1.6111 |
| 1441444_at   | Nbeal1        | neurobeachin like 1                                                         | BB022773  | 5.7139  | 4.1035 | 1.6105 |
| 1452841_at   | Pgm211        | phosphoglucomutase 2-like 1                                                 | BG073164  | 8.0510  | 6.4409 | 1.6101 |
| 1460561_x_at | Sepw1         | selenoprotein W, muscle 1                                                   | BB464434  | 11.2690 | 9.6598 | 1.6092 |
| 1435264_at   | Emilin2       | elastin microfibril interfacier 2                                           | BB811788  | 6.9504  | 5.3414 | 1.6090 |
| 1427650_a_at | Runx1         | runt related transcription factor 1                                         | D13802    | 7.8288  | 6.2200 | 1.6088 |
| 1447452_at   | Reep3         | receptor accessory protein 3                                                | AW124565  | 5.3039  | 3.6972 | 1.6067 |
| 1437941_at   | Phka2         | phosphorylase kinase alpha 2                                                | BB307726  | 5.8157  | 4.2096 | 1.6061 |
| 1460469_at   | Tnfrsf9       | tumor necrosis factor receptor superfamily, member 9                        | BM250782  | 7.4692  | 5.8632 | 1.6061 |
| 1421430_at   | Rad5111       | RAD51-like 1 (S. cerevisiae)                                                | NM_009014 | 7.6211  | 6.0153 | 1.6058 |
| 1436031_at   | Cachd1        | cache domain containing 1                                                   | BB730977  | 6.0047  | 4.3997 | 1.6050 |
| 1452224_at   | Morc3         | microrchidia 3                                                              | BC026506  | 8.9280  | 7.3238 | 1.6042 |
| 1443790_x_at | 4930414L22Rik | RIKEN cDNA 4930414L22 gene                                                  | AV208084  | 6.1607  | 4.5566 | 1.6041 |
| 1453683_a_at | Cep55         | centrosomal protein 55                                                      | AV126179  | 6.1607  | 4.5566 | 1.6041 |
| 1436738_at   | Pif1          | PIF1 5'-to-3' DNA helicase homolog (S. cerevisiae)                          | AV094878  | 8.5713  | 6.9692 | 1.6020 |
| 1417508_at   | Rnf19a        | ring finger protein 19A                                                     | AF120206  | 10.1888 | 8.5881 | 1.6008 |
| 1433712_at   | AW555464      | expressed sequence AW555464                                                 | AV032365  | 9.9148  | 8.3146 | 1.6002 |
| 1417542_at   | Rps6ka2       | ribosomal protein S6 kinase, polypeptide 2                                  | BB737182  | 8.7241  | 7.1253 | 1.5988 |
| 1434314_s_at | Rab11fip5     | RAB11 family interacting protein 5 (class I)                                | BQ177085  | 9.7801  | 8.1820 | 1.5981 |
| 1440920_at   | Mmp14         | matrix metalloproteinase 14 (membrane-                                      | BB535404  | 8.4417  | 6.8439 | 1.5978 |
| 1455680_at   |               |                                                                             | BB438526  | 9.0081  | 7.4103 | 1.5977 |
| 1430971_a_at | Aqr           | aquarius                                                                    | AK020468  | 5.7781  | 4.1807 | 1.5974 |
| 1417472_at   | Myh9          | myosin, heavy polypeptide 9, non-muscle                                     | NM_022410 | 10.8772 | 9.2828 | 1.5944 |
| 1459391_at   | Abca5         | ATP-binding cassette, sub-family A (ABC1), member 5                         | BB128256  | 5.9097  | 4.3163 | 1.5934 |
| 1430341_at   | Nudt5         | nudix (nucleoside diphosphate linked moiety X)-type motif 5                 | BE200248  | 6.8599  | 5.2685 | 1.5914 |
| 1453590_at   | Arl5b         | ADP-ribosylation factor-like 5B                                             | BQ032239  | 6.0892  | 4.4990 | 1.5902 |
| 1422428_at   | Acsbg1        | acyl-CoA synthetase bubblegum family member 1                               | NM_053178 | 8.0622  | 6.4737 | 1.5885 |
| 1449483_at   | Polk          | polymerase (DNA directed), kappa                                            | BC008105  | 9.6188  | 8.0309 | 1.5879 |
| 1439352_at   | Trim7         | tripartite motif-containing 7                                               | BB825733  | 5.7565  | 4.1689 | 1.5876 |
| 1444021_at   |               |                                                                             | AW741388  | 7.0394  | 5.4518 | 1.5876 |
| 1418148_at   | Abhd1         | abhydrolase domain containing 1                                             | NM_021304 | 7.1176  | 5.5301 | 1.5876 |
| 1422403_at   |               |                                                                             | NM_008334 | 6.5001  | 4.9148 | 1.5853 |
| 1460220_a_at | Csf1          | colony stimulating factor 1 (macrophage)                                    | BM233698  | 10.3530 | 8.7678 | 1.5852 |
| 1431697_at   | Synj2         | synaptojanin 2                                                              | AK014584  | 6.3260  | 4.7408 | 1.5851 |
| 1440345_at   | AI450353      | expressed sequence AI450353                                                 | AI447886  | 6.9605  | 5.3785 | 1.5819 |
| 1429787_x_at | Zwint         | ZW10 interactor                                                             | AK008144  | 10.6936 | 9.1134 | 1.5802 |



|              |               |                                                                                       |           |         |         |        |
|--------------|---------------|---------------------------------------------------------------------------------------|-----------|---------|---------|--------|
| 1443266_at   | Npc2          | Niemann Pick type C2                                                                  | BB556874  | 5.5812  | 4.0013  | 1.5799 |
| 1436226_at   | Tceb1         | transcription elongation factor B (SIII), polypeptide 1                               | AI891570  | 7.6064  | 6.0270  | 1.5794 |
| 1449056_at   | E330009J07Rik | RIKEN cDNA E330009J07 gene                                                            | NM_133929 | 9.5953  | 8.0161  | 1.5792 |
| 1457651_x_at | Rem2          | rad and gem related GTP binding protein 2                                             | BB270375  | 5.6689  | 4.0913  | 1.5775 |
| 1456320_at   | Fam126b       | family with sequence similarity 126, member B                                         | BB701297  | 8.3333  | 6.7577  | 1.5757 |
| 1431362_a_at | Smoc2         | SPARC related modular calcium binding 2                                               | AK006809  | 5.0210  | 3.4467  | 1.5744 |
| 1436365_at   | Zbtb7c        | zinc finger and BTB domain containing 7C                                              | BG922355  | 5.2234  | 3.6503  | 1.5730 |
| 1418648_at   | Egln3         | EGL nine homolog 3 (C. elegans)                                                       | BB284358  | 8.1591  | 6.5881  | 1.5710 |
| 1425573_a_at | Asap1         | ArfGAP with SH3 domain, ankyrin repeat and PH domain1                                 | BE943736  | 8.0455  | 6.4746  | 1.5709 |
| 1451477_at   |               |                                                                                       | AV047635  | 5.8041  | 4.2333  | 1.5708 |
| 1455523_at   | Cstf2         | cleavage stimulation factor, 3' pre-RNA subunit 2                                     | BG074683  | 8.3885  | 6.8186  | 1.5699 |
| 1435251_at   | Snx13         | sorting nexin 13                                                                      | AV377013  | 9.0708  | 7.5015  | 1.5693 |
| 1451413_at   | Cast          | calpastatin                                                                           | AB026997  | 10.3431 | 8.7740  | 1.5692 |
| 1427334_s_at | 2810474O19Rik | RIKEN cDNA 2810474O19 gene                                                            | BE196832  | 9.9545  | 8.3860  | 1.5685 |
| 1450005_x_at | Dlk2          | delta-like 2 homolog (Drosophila)                                                     | NM_134120 | 7.2083  | 5.6402  | 1.5680 |
| 1417611_at   | Tmem37        | transmembrane protein 37                                                              | BC024613  | 8.0942  | 6.5268  | 1.5674 |
| 1431131_s_at | A630007B06Rik | RIKEN cDNA A630007B06 gene                                                            | BI106826  | 8.0246  | 6.4574  | 1.5672 |
| 1438929_at   |               |                                                                                       | BB168595  | 6.6707  | 5.1036  | 1.5670 |
| 1434628_a_at | Rhpn2         | rhopilin, Rho GTPase binding protein 2                                                | BF228009  | 7.8447  | 6.2817  | 1.5630 |
| 1452589_at   | Ptk7          | PTK7 protein tyrosine kinase 7                                                        | AK018379  | 7.4502  | 5.8877  | 1.5625 |
| 1442083_at   | Rsrc2         | arginine/serine-rich coiled-coil 2                                                    | BB036922  | 8.3541  | 6.7928  | 1.5613 |
| 1452295_at   | Pmepa1        | prostate transmembrane protein, androgen induced 1                                    | AV291712  | 5.3414  | 3.7810  | 1.5604 |
| 1421833_at   | Pip5k1b       | phosphatidylinositol-4-phosphate 5-kinase, type 1 beta                                | NM_008846 | 6.6572  | 5.0970  | 1.5603 |
| 1443779_s_at | Lcor          | ligand dependent nuclear receptor corepressor                                         | BB239253  | 9.1290  | 7.5689  | 1.5601 |
| 1436101_at   |               |                                                                                       | BB752033  | 8.3150  | 6.7553  | 1.5597 |
| 1457687_at   | Bcl2          | B cell leukemia/lymphoma 2                                                            | BI664467  | 8.9987  | 7.4391  | 1.5596 |
| 1435904_at   | Eif2c3        | eukaryotic translation initiation factor 2C, 3                                        | BB355034  | 7.2050  | 5.6457  | 1.5593 |
| 1437117_at   | Acap1         | ArfGAP with coiled-coil, ankyrin repeat and PH domains 1                              | BB757196  | 7.2562  | 5.6970  | 1.5592 |
| 1427261_at   | Wwc1          | WW, C2 and coiled-coil domain containing 1                                            | BQ176786  | 10.1635 | 8.6044  | 1.5591 |
| 1416531_at   | Gsto1         | glutathione S-transferase omega 1                                                     | NM_010362 | 11.8786 | 10.3206 | 1.5580 |
| 1430092_at   | Serac1        | serine active site containing 1                                                       | BB785152  | 6.7217  | 5.1653  | 1.5564 |
| 1437929_at   | Dact2         | dapper homolog 2, antagonist of beta-catenin (xenopus)                                | AV306847  | 6.8057  | 5.2494  | 1.5564 |
| 1432260_at   | Gpr39         | G protein-coupled receptor 39                                                         | AK016817  | 5.5928  | 4.0372  | 1.5556 |
| 1442107_at   | Flnb          | filamin, beta                                                                         | BM218614  | 7.6956  | 6.1404  | 1.5552 |
| 1418924_at   | Rassf7        | Ras association (RalGDS/AF-6) domain family (N-terminal) member 7                     | NM_025886 | 8.7913  | 7.2363  | 1.5550 |
| 1423137_at   | Rala          | v-ral simian leukemia viral oncogene homolog A (ras related)                          | BG073338  | 11.0413 | 9.4866  | 1.5547 |
| 1452161_at   | Tiparp        | TCDD-inducible poly(ADP-ribose) polymerase                                            | BB707122  | 10.0739 | 8.5193  | 1.5546 |
| 1450437_a_at | Ncam1         | neural cell adhesion molecule 1                                                       | NM_010875 | 5.9079  | 4.3533  | 1.5546 |
| 1441737_s_at | Rassf1        | Ras association (RalGDS/AF-6) domain family member 1                                  | BB757103  | 10.4435 | 8.8894  | 1.5541 |
| 1429096_at   | 2810455D13Rik | RIKEN cDNA 2810455D13 gene                                                            | AK013353  | 6.8973  | 5.3437  | 1.5536 |
| 1456262_at   | Rbm5          | RNA binding motif protein 5                                                           | BE446879  | 8.3716  | 6.8185  | 1.5531 |
| 1440461_at   |               |                                                                                       | BB229269  | 6.2772  | 4.7243  | 1.5528 |
| 1442382_at   | Mast4         | microtubule associated serine/threonine kinase family member 4                        | BI714055  | 5.7204  | 4.1689  | 1.5515 |
| 1448170_at   | Siah2         | seven in absentia 2                                                                   | AA414485  | 8.5970  | 7.0461  | 1.5508 |
| 1426232_at   | BC024479      | cDNA sequence BC024479                                                                | BC024479  | 8.3303  | 6.7797  | 1.5505 |
| 1417013_at   | Hspb8         | heat shock protein 8                                                                  | AF250139  | 9.4056  | 7.8561  | 1.5495 |
| 1435580_at   | C230081A13Rik | RIKEN cDNA C230081A13 gene                                                            | AW553275  | 9.9257  | 8.3765  | 1.5492 |
| 1416042_s_at | Nasp          | nuclear autoantigenic sperm protein (histone-binding)                                 | BB493242  | 10.6422 | 9.0937  | 1.5485 |
| 1419938_s_at | Arhgef17      | Rho guanine nucleotide exchange factor (GEF) 17                                       | AW558066  | 5.6512  | 4.1035  | 1.5477 |
| 1417516_at   | Ddit3         | DNA-damage inducible transcript 3                                                     | NM_007837 | 9.9335  | 8.3860  | 1.5475 |
| 1448295_at   | Med10         | mediator of RNA polymerase II transcription, subunit 10 homolog (NUT2, S. cerevisiae) | NM_138596 | 10.6634 | 9.1159  | 1.5474 |
| 1421963_a_at | Cdc25b        | cell division cycle 25B                                                               | NM_023117 | 10.2806 | 8.7339  | 1.5468 |

|              |               |                                                                                    |           |         |         |        |
|--------------|---------------|------------------------------------------------------------------------------------|-----------|---------|---------|--------|
| 1440943_at   | Rabl6         | RAB, member of RAS oncogene family-like 6                                          | BB362902  | 7.1072  | 5.5610  | 1.5462 |
| 1452160_at   | Tiparp        | TCDD-inducible poly(ADP-ribose) polymerase                                         | BB707122  | 10.8459 | 9.3004  | 1.5455 |
| 1425479_at   | Smyd5         | SET and MYND domain containing 5                                                   | BF160651  | 7.2969  | 5.7515  | 1.5454 |
| 1434546_at   | Smg5          | Smg-5 homolog, nonsense mediated mRNA decay factor (C. elegans)                    | BI106637  | 8.9363  | 7.3912  | 1.5451 |
| 1450997_at   | Stk17b        | serine/threonine kinase 17b (apoptosis-inducing)                                   | AV173139  | 8.6826  | 7.1383  | 1.5444 |
| 1426284_at   | Krt20         | keratin 20                                                                         | AF473907  | 5.5812  | 4.0372  | 1.5440 |
| 1431202_at   | Herc3         | hect domain and RLD 3                                                              | AK017531  | 6.4157  | 4.8719  | 1.5438 |
| 1452471_at   | Il17rd        | interleukin 17 receptor D                                                          | AF459444  | 5.3760  | 3.8342  | 1.5417 |
| 1426950_at   | Parp16        | poly (ADP-ribose) polymerase family, member 16                                     | BC014731  | 7.7674  | 6.2266  | 1.5407 |
| 1460453_at   |               |                                                                                    | BM220475  | 9.8500  | 8.3108  | 1.5392 |
| 1426243_at   | Cth           | cystathionase (cystathionine gamma-lyase)                                          | BC019483  | 10.4346 | 8.8954  | 1.5391 |
| 1424252_at   | Hnrpd1        | heterogeneous nuclear ribonucleoprotein D-like                                     | BC021374  | 11.1191 | 9.5803  | 1.5388 |
| 1449357_at   | 2310030G06Rik | RIKEN cDNA 2310030G06 gene                                                         | NM_025865 | 6.7438  | 5.2054  | 1.5384 |
| 1419495_at   | Immp2l        | IMP2 inner mitochondrial membrane peptidase-like (S. cerevisiae)                   | NM_053122 | 7.0360  | 5.4985  | 1.5374 |
| 1417843_s_at | Eps8l2        | EPS8-like 2                                                                        | NM_133191 | 7.4493  | 5.9119  | 1.5374 |
| 1416575_at   | Cdc45         | cell division cycle 45                                                             | NM_009862 | 9.5569  | 8.0199  | 1.5370 |
| 1417509_at   | Rnf19a        | ring finger protein 19A                                                            | AF120206  | 7.7607  | 6.2238  | 1.5369 |
| 1441556_at   |               |                                                                                    | BB476958  | 6.2575  | 4.7207  | 1.5368 |
| 1450138_a_at | Serpinb6a     | serine (or cysteine) peptidase inhibitor, clade B, member 6a                       | NM_009254 | 12.0286 | 10.4937 | 1.5348 |
| 1426238_at   | Bmp1          | bone morphogenetic protein 1                                                       | L24755    | 9.3160  | 7.7835  | 1.5325 |
| 1426875_s_at | Srxn1         | sulfiredoxin 1 homolog (S. cerevisiae)                                             | BM210600  | 8.7788  | 7.2467  | 1.5320 |
| 1434046_at   | AA467197      | expressed sequence AA467197                                                        | BG961961  | 10.4987 | 8.9683  | 1.5304 |
| 1438774_s_at | Pgm2l1        | phosphoglucomutase 2-like 1                                                        | AW702170  | 6.4952  | 4.9657  | 1.5294 |
| 1422027_a_at | Ets1          | E26 avian leukemia oncogene 1, 5' domain                                           | BC010588  | 7.3921  | 5.8632  | 1.5290 |
| 1445626_at   |               |                                                                                    | AI426376  | 7.5360  | 6.0081  | 1.5279 |
| 1438069_a_at | Rbm5          | RNA binding motif protein 5                                                        | BE446879  | 7.1383  | 5.6110  | 1.5272 |
| 1451602_at   | Snx6          | sorting nexin 6                                                                    | BC025911  | 10.0913 | 8.5643  | 1.5270 |
| 1423232_at   | Etv4          | ets variant gene 4 (E1A enhancer binding protein, E1AF)                            | X63190    | 8.4793  | 6.9527  | 1.5265 |
| 1430031_at   | Ipmk          | inositol polyphosphate multikinase                                                 | AK010523  | 6.4952  | 4.9692  | 1.5260 |
| 1426337_a_at | Tead4         | TEA domain family member 4                                                         | D87965    | 6.8313  | 5.3054  | 1.5259 |
| 1418461_at   | Sh3d19        | SH3 domain protein D19                                                             | NM_012059 | 7.9501  | 6.4242  | 1.5259 |
| 1429555_at   | Cldn25        | claudin 25                                                                         | AA408371  | 8.3946  | 6.8688  | 1.5258 |
| 1451123_at   | N4bp3         | NEDD4 binding protein 3                                                            | BC006740  | 8.5541  | 7.0284  | 1.5257 |
| 1440349_at   | 4930420K17Rik | RIKEN cDNA 4930420K17 gene                                                         | AV271839  | 7.6914  | 6.1668  | 1.5247 |
| 1424448_at   | Trim6         | tripartite motif-containing 6                                                      | BC026912  | 6.8313  | 5.3072  | 1.5241 |
| 1417406_at   | Sertad1       | SERTA domain containing 1                                                          | AF366401  | 9.5803  | 8.0564  | 1.5239 |
| 1423623_at   | 2810021B07Rik | RIKEN cDNA 2810021B07 gene                                                         | AW060558  | 7.9971  | 6.4737  | 1.5234 |
| 1441063_at   | Eif2c3        | eukaryotic translation initiation factor 2C, 3                                     | BB229155  | 7.5990  | 6.0777  | 1.5213 |
| 1457404_at   | Nfkbiz        | nuclear factor of kappa light polypeptide gene enhancer in B cells inhibitor, zeta | BM240058  | 8.0217  | 6.5005  | 1.5212 |
| 1439148_a_at | Pfkl          | phosphofructokinase, liver, B-type                                                 | BE914497  | 10.2616 | 8.7410  | 1.5205 |
| 1426226_at   | Dyrk1a        | dual-specificity tyrosine-(Y)-phosphorylation regulated kinase 1a                  | U58497    | 6.3015  | 4.7815  | 1.5199 |
| 1456609_at   | Camk2n1       | calcium/calmodulin-dependent protein kinase II inhibitor 1                         | BE994488  | 10.1318 | 8.6119  | 1.5199 |
| 1451992_at   | Adrbk1        | adrenergic receptor kinase, beta 1                                                 | AF333028  | 9.0658  | 7.5472  | 1.5186 |
| 1445128_at   |               |                                                                                    | BQ176646  | 6.2392  | 4.7207  | 1.5185 |
| 1446299_at   |               |                                                                                    | BB462772  | 6.5268  | 5.0107  | 1.5161 |
| 1439770_at   | 6430598A04Rik | RIKEN cDNA 6430598A04 gene                                                         | BB387298  | 8.6643  | 7.1485  | 1.5158 |
| 1435132_at   | Disp1         | dispatched homolog 1 (Drosophila)                                                  | AI505698  | 8.0574  | 6.5418  | 1.5156 |
| 1448860_at   | Rem2          | rad and gem related GTP binding protein 2                                          | NM_080726 | 7.2935  | 5.7780  | 1.5155 |
| 1423286_at   | Cbln1         | cerebellin 1 precursor protein                                                     | AA016422  | 6.8915  | 5.3765  | 1.5149 |
| 1419169_at   | Mapk6         | mitogen-activated protein kinase 6                                                 | BC024684  | 10.2218 | 8.7092  | 1.5126 |
| 1420170_at   | Myh9          | myosin, heavy polypeptide 9, non-muscle                                            | C80049    | 9.9530  | 8.4405  | 1.5125 |
| 1444559_at   | Phf2          | putative homeodomain transcription factor 2                                        | BB710932  | 7.3506  | 5.8382  | 1.5124 |
| 1435972_at   | Cast          | calpastatin                                                                        | BB148748  | 9.8561  | 8.3450  | 1.5111 |
| 1437731_at   | C2cd2         | C2 calcium-dependent domain containing 2                                           | BB834407  | 6.6079  | 5.0970  | 1.5110 |
| 1433477_at   | Abr           | active BCR-related gene                                                            | AV325116  | 8.1814  | 6.6707  | 1.5107 |
| 1445201_at   | Zfp53         | zinc finger protein 53                                                             | BB176857  | 6.2831  | 4.7725  | 1.5106 |
| 1457692_at   |               |                                                                                    | BB641320  | 7.2991  | 5.7904  | 1.5087 |

|              |               |                                                                                                   |           |         |         |        |
|--------------|---------------|---------------------------------------------------------------------------------------------------|-----------|---------|---------|--------|
| 1423077_at   | Snx9          | sorting nexin 9                                                                                   | BB703513  | 9.7117  | 8.2040  | 1.5077 |
| 1449455_at   | Hck           | hemopoietic cell kinase                                                                           | NM_010407 | 5.5091  | 4.0021  | 1.5070 |
| 1444295_at   | Neo1          | neogenin                                                                                          | BB129888  | 5.4771  | 3.9701  | 1.5070 |
| 1424646_at   | Uckl1         | uridine-cytidine kinase 1-like 1                                                                  | BC016535  | 9.0572  | 7.5511  | 1.5061 |
| 1442933_at   | Foxk2         | forkhead box K2                                                                                   | BB046659  | 6.1185  | 4.6127  | 1.5058 |
| 1456309_x_at | Lasp1         | LIM and SH3 protein 1                                                                             | BG146595  | 10.5381 | 9.0331  | 1.5050 |
| 1444402_at   | Zc3h12c       | zinc finger CCCH type containing 12C                                                              | BB383429  | 7.4406  | 5.9357  | 1.5049 |
| 1448497_at   | Erc3          | excision repair cross-complementing rodent repair deficiency, complementation group 3             | NM_133658 | 9.3777  | 7.8737  | 1.5040 |
| 1440924_at   | Kif20b        | kinesin family member 20B                                                                         | BM239553  | 7.4055  | 5.9037  | 1.5018 |
| 1416488_at   | Ccng2         | cyclin G2                                                                                         | U95826    | 11.1193 | 9.6182  | 1.5011 |
| 1459673_at   | Gtf3c1        | general transcription factor III C 1                                                              | BB171591  | 5.3414  | 3.8409  | 1.5005 |
| 1430089_at   | 5830469G19Rik | RIKEN cDNA 5830469G19 gene                                                                        | BB032195  | 7.6809  | 6.1807  | 1.5002 |
| 1436708_x_at | Mcm4          | minichromosome maintenance deficient 4 homolog (S. cerevisiae)                                    | BB447978  | 11.2361 | 9.7361  | 1.5000 |
| 1428058_at   | Ahnak         | AHNAK nucleoprotein (desmoyokin)                                                                  | BC028439  | 7.6159  | 6.1164  | 1.4994 |
| 1433776_at   | Lhfp          | lipoma HMGIC fusion partner                                                                       | AV149705  | 10.9135 | 9.4145  | 1.4991 |
| 1450916_at   | Stau2         | stau2 (RNA binding protein) homolog 2 (Drosophila)                                                | AI843206  | 6.0270  | 4.5289  | 1.4980 |
| 1429810_at   | Rictor        | RPTOR independent companion of MTOR, complex 2                                                    | BM123174  | 8.1335  | 6.6376  | 1.4959 |
| 1457107_at   |               |                                                                                                   | BB531660  | 6.6422  | 5.1473  | 1.4949 |
| 1446196_at   | Hmga2         | high mobility group AT-hook 2                                                                     | BB105328  | 6.6421  | 5.1477  | 1.4943 |
| 1436349_at   | 2700094K13Rik | RIKEN cDNA 2700094K13 gene                                                                        | BI408855  | 12.2372 | 10.7431 | 1.4941 |
| 1448855_at   | Rassf1        | Ras association (RalGDS/AF-6) domain family member 1                                              | NM_019713 | 9.7552  | 8.2615  | 1.4937 |
| 1416214_at   | Mcm4          | minichromosome maintenance deficient 4 homolog (S. cerevisiae)                                    | BC013094  | 11.9576 | 10.4661 | 1.4915 |
| 1423465_at   | Frrs1         | ferric-chelate reductase 1                                                                        | BB032852  | 10.2155 | 8.7241  | 1.4914 |
| 1428671_at   | 2200002D01Rik | RIKEN cDNA 2200002D01 gene                                                                        | AK008617  | 8.5704  | 7.0790  | 1.4914 |
| 1449038_at   | Hsd11b1       | hydroxysteroid 11-beta dehydrogenase 1                                                            | NM_008288 | 6.5881  | 5.0970  | 1.4911 |
| 1456256_at   | Eif5          | eukaryotic translation initiation factor 5                                                        | BM242785  | 8.8905  | 7.3998  | 1.4907 |
| 1419080_at   | Gdnf          | glial cell line derived neurotrophic factor                                                       | NM_010275 | 8.5314  | 7.0409  | 1.4905 |
| 1438012_at   | Ppm1l         | protein phosphatase 1 (formerly 2C)-like                                                          | BB308836  | 8.1492  | 6.6589  | 1.4903 |
| 1429169_at   | Rbm3          | RNA binding motif protein 3                                                                       | AK011224  | 6.8323  | 5.3430  | 1.4893 |
| 1418404_at   | Rad9          | RAD9 homolog (S. pombe)                                                                           | NM_011237 | 8.8099  | 7.3208  | 1.4891 |
| 1431440_at   | Pole2         | polymerase (DNA directed), epsilon 2 (p59 subunit)                                                | AK011941  | 5.1383  | 3.6503  | 1.4880 |
| 1452640_at   | 3110007F17Rik | RIKEN cDNA 3110007F17 gene                                                                        | AK014019  | 6.7928  | 5.3054  | 1.4874 |
| 1448183_a_at | Hif1a         | hypoxia inducible factor 1, alpha subunit                                                         | BB269715  | 6.6366  | 5.1496  | 1.4870 |
| 1429298_at   | Ddah1         | dimethylarginine dimethylaminohydrolase 1                                                         | BE283964  | 9.3852  | 7.8997  | 1.4855 |
| 1421424_a_at | Anpep         | alanine (membrane) aminopeptidase                                                                 | NM_008486 | 5.2733  | 3.7880  | 1.4854 |
| 1444248_at   | Rcn2          | reticulocalbin 2                                                                                  | AV175094  | 6.2582  | 4.7731  | 1.4851 |
| 1433808_at   | Heatr7a       | HEAT repeat containing 7A                                                                         | BB473496  | 9.3171  | 7.8324  | 1.4847 |
| 1426750_at   | Flnb          | filamin, beta                                                                                     | AW538200  | 10.4048 | 8.9215  | 1.4834 |
| 1421096_at   | Trpc1         | transient receptor potential cation channel, subfamily C, member 1                                | BB817939  | 8.3258  | 6.8439  | 1.4819 |
| 1423786_at   | 8430410A17Rik | RIKEN cDNA 8430410A17 gene                                                                        | BC024401  | 9.4502  | 7.9689  | 1.4813 |
| 1428395_at   | Smurf1        | SMAD specific E3 ubiquitin protein ligase 1                                                       | BB832916  | 7.9379  | 6.4574  | 1.4805 |
| 1451739_at   | Klf5          | Kruppel-like factor 5                                                                             | BC006646  | 6.3997  | 4.9195  | 1.4802 |
| 1431805_a_at | Rhpn2         | rhopilin, Rho GTPase binding protein 2                                                            | AK004849  | 7.2314  | 5.7515  | 1.4799 |
| 1448383_at   | Mmp14         | matrix metalloproteinase 14 (membrane-                                                            | NM_008608 | 10.0529 | 8.5732  | 1.4798 |
| 1423122_at   | Avpi1         | arginine vasopressin-induced 1                                                                    | BI649826  | 10.4233 | 8.9441  | 1.4792 |
| 1448364_at   | Ccng2         | cyclin G2                                                                                         | U95826    | 8.6270  | 7.1485  | 1.4785 |
| 1448613_at   | Ecm1          | extracellular matrix protein 1                                                                    | NM_007899 | 10.0400 | 8.5618  | 1.4783 |
| 1428472_at   | Spsb1         | splA/ryanodine receptor domain and SOCS box containing 1                                          | AK003707  | 6.3498  | 4.8719  | 1.4780 |
| 1459824_at   | Smarcc1       | SWI/SNF related, matrix associated, actin dependent regulator of chromatin, subfamily c, member 1 | BB286894  | 5.4992  | 4.0233  | 1.4759 |
| 1441108_at   |               |                                                                                                   | AU040876  | 6.5291  | 5.0543  | 1.4748 |
| 1457970_at   | Actr1a        | ARP1 actin-related protein 1A, centractin alpha                                                   | W91599    | 5.3765  | 3.9024  | 1.4741 |
| 1416521_at   | Sepw1         | selenoprotein W, muscle 1                                                                         | NM_009156 | 8.2848  | 6.8118  | 1.4730 |
| 1459750_s_at | Gpr123        | G protein-coupled receptor 123                                                                    | AU015577  | 5.3738  | 3.9024  | 1.4714 |
| 1457468_at   |               |                                                                                                   | BB042052  | 6.3902  | 4.9195  | 1.4707 |
| 1417207_at   | Dvl2          | dishevelled 2, dsh homolog (Drosophila)                                                           | BF466091  | 8.5490  | 7.0783  | 1.4707 |

|              |               |                                                                               |           |         |         |        |
|--------------|---------------|-------------------------------------------------------------------------------|-----------|---------|---------|--------|
| 1450269_a_at | Pfkl          | phosphofructokinase, liver, B-type                                            | NM_008826 | 9.1460  | 7.6764  | 1.4696 |
| 1432161_a_at | Ptar1         | protein prenyltransferase alpha subunit repeat containing 1                   | AK006988  | 5.4108  | 3.9414  | 1.4694 |
| 1437601_at   | Otx1          | orthodenticle homolog 1 (Drosophila)                                          | BB438279  | 7.9099  | 6.4409  | 1.4690 |
| 1421111_at   | Rybp          | RING1 and YY1 binding protein                                                 | NM_019743 | 7.5877  | 6.1198  | 1.4679 |
| 1452540_a_at |               |                                                                               | M25487    | 9.6519  | 8.1843  | 1.4677 |
| 1424983_a_at | Cacul1        | CDK2 associated, cullin domain 1                                              | BB137173  | 8.0943  | 6.6275  | 1.4668 |
| 1446228_at   | Ermp1         | endoplasmic reticulum metalloproteinase 1                                     | BB222614  | 6.2392  | 4.7725  | 1.4667 |
| 1424572_a_at | H2afy         | H2A histone family, member Y                                                  | AF171080  | 11.2346 | 9.7682  | 1.4664 |
| 1420008_s_at | Wwc1          | WW, C2 and coiled-coil domain containing 1                                    | AU017197  | 10.4273 | 8.9616  | 1.4657 |
| 1419074_at   | Chac2         | ChaC, cation transport regulator 2                                            | NM_026527 | 8.7973  | 7.3328  | 1.4645 |
| 1421354_at   | Prkg2         | protein kinase, cGMP-dependent, type II                                       | NM_008926 | 5.0107  | 3.5463  | 1.4644 |
| 1416537_at   | Creld1        | cysteine-rich with EGF-like domains 1                                         | NM_133930 | 9.6201  | 8.1559  | 1.4642 |
| 1429653_at   |               |                                                                               | BE863648  | 6.3358  | 4.8719  | 1.4639 |
| 1430012_at   | 1110050K14Rik | RIKEN cDNA 1110050K14 gene                                                    | AK004221  | 8.3078  | 6.8444  | 1.4634 |
| 1418380_at   | Terf1         | telomeric repeat binding factor 1                                             | NM_009352 | 9.6839  | 8.2218  | 1.4622 |
| 1458667_at   | Ninl          | ninein-like                                                                   | AV266695  | 7.0226  | 5.5610  | 1.4616 |
| 1458841_at   |               |                                                                               | BB499674  | 5.7926  | 4.3315  | 1.4611 |
| 1446636_at   | Tns3          | tensin 3                                                                      | BB499706  | 5.9198  | 4.4597  | 1.4602 |
| 1459371_at   |               |                                                                               | BB458938  | 5.8297  | 4.3695  | 1.4602 |
| 1428836_at   | 2300009A05Rik | RIKEN cDNA 2300009A05 gene                                                    | AK009046  | 8.2525  | 6.7928  | 1.4597 |
| 1433782_at   | Cldn12        | claudin 12                                                                    | AW554231  | 9.5094  | 8.0510  | 1.4584 |
| 1458385_at   | Hspa4l        | heat shock protein 4 like                                                     | AI461691  | 8.6434  | 7.1853  | 1.4581 |
| 1437119_at   | Ern1          | endoplasmic reticulum (ER) to nucleus signalling 1                            | BG075179  | 9.3003  | 7.8433  | 1.4570 |
| 1433503_at   | Ptgr2         | prostaglandin reductase 2                                                     | BB667090  | 7.4292  | 5.9724  | 1.4568 |
| 1457145_at   | Plekhg4       | pleckstrin homology domain containing, family G (with RhoGef domain) member 4 | AV271771  | 6.5111  | 5.0544  | 1.4567 |
| 1417612_at   | Ier5          | immediate early response 5                                                    | BF147705  | 9.1696  | 7.7130  | 1.4566 |
| 1418773_at   | Fads3         | fatty acid desaturase 3                                                       | BE652876  | 9.6687  | 8.2121  | 1.4566 |
| 1419572_a_at | Abcd4         | ATP-binding cassette, sub-family D (ALD), member 4                            | NM_008992 | 8.7886  | 7.3328  | 1.4558 |
| 1416156_at   | Vcl           | vinculin                                                                      | NM_009502 | 10.9063 | 9.4510  | 1.4553 |
| 1453295_at   | Asxl2         | additional sex combs like 2 (Drosophila)                                      | AK016141  | 6.0777  | 4.6227  | 1.4550 |
| 1445537_at   | 2310039F13Rik | RIKEN cDNA 2310039F13 gene                                                    | BM224499  | 5.6873  | 4.2333  | 1.4540 |
| 1418758_a_at | Cyth3         | cytohesin 3                                                                   | NM_011182 | 9.9002  | 8.4466  | 1.4536 |
| 1435872_at   |               |                                                                               | BE631223  | 7.2333  | 5.7807  | 1.4526 |
| 1435697_a_at | Cytip         | cytohesin 1 interacting protein                                               | BB503614  | 5.3561  | 3.9050  | 1.4511 |
| 1434360_s_at | Ptprg         | protein tyrosine phosphatase, receptor type, G                                | AI596632  | 5.3765  | 3.9256  | 1.4509 |
| 1420766_at   | Socs7         | suppressor of cytokine signaling 7                                            | NM_138657 | 6.6421  | 5.1918  | 1.4503 |
| 1434196_at   | Dnaja4        | DnaJ (Hsp40) homolog, subfamily A, member 4                                   | BQ176119  | 6.6801  | 5.2306  | 1.4494 |
| 1430239_at   | 5430421F17Rik | RIKEN cDNA 5430421F17 gene                                                    | AK017331  | 5.2829  | 3.8342  | 1.4486 |
| 1436368_at   | Slc16a10      | solute carrier family 16 (monocarboxylic acid transporters), member 10        | BB140436  | 6.2230  | 4.7749  | 1.4481 |
| 1457284_at   |               |                                                                               | BB766038  | 6.8439  | 5.3963  | 1.4476 |
| 1419301_at   | Fzd4          | frizzled homolog 4 (Drosophila)                                               | BF783030  | 6.4791  | 5.0318  | 1.4473 |
| 1436248_at   | Rasal2        | RAS protein activator like 2                                                  | AW120749  | 8.1825  | 6.7353  | 1.4473 |
| 1429642_at   | Zfand4        | zinc finger, AN1-type domain 4                                                | AK012639  | 8.3803  | 6.9332  | 1.4471 |
| 1429588_at   | 2810474O19Rik | RIKEN cDNA 2810474O19 gene                                                    | AA509870  | 10.1847 | 8.7377  | 1.4471 |
| 1452991_at   | Chd2          | chromodomain helicase DNA binding protein 2                                   | BB211667  | 6.2582  | 4.8114  | 1.4468 |
| 1421729_a_at | Fert2         | fer (fms/fps related) protein kinase, testis specific 2                       | NM_008000 | 8.6411  | 7.1952  | 1.4460 |
| 1453759_at   |               |                                                                               | AK019597  | 6.6941  | 5.2481  | 1.4459 |
| 1445328_at   | Col4a4        | collagen, type IV, alpha 4                                                    | BB530633  | 5.0544  | 3.6087  | 1.4457 |
| 1446272_at   | Cdk17         | cyclin-dependent kinase 17                                                    | BB200545  | 5.6139  | 4.1689  | 1.4450 |
| 1449167_at   | Epb4.114a     | erythrocyte protein band 4.1-like 4a                                          | NM_013512 | 8.8461  | 7.4011  | 1.4450 |
| 1418901_at   | Cebpb         | CCAAT/enhancer binding protein (C/EBP), beta                                  | NM_009883 | 11.3247 | 9.8801  | 1.4446 |
| 1423349_at   | Socs5         | suppressor of cytokine signaling 5                                            | AA510713  | 9.8773  | 8.4335  | 1.4439 |
| 1425126_at   | Ncam1         | neural cell adhesion molecule 1                                               | BC011310  | 5.2306  | 3.7880  | 1.4426 |
| 1425273_s_at | Emp2          | epithelial membrane protein 2                                                 | AF083876  | 6.6726  | 5.2306  | 1.4419 |
| 1423325_at   | Pnn           | pinin                                                                         | AV135835  | 9.0558  | 7.6140  | 1.4418 |
| 1435630_s_at |               |                                                                               | AV148646  | 12.1315 | 10.6898 | 1.4418 |
| 1439493_at   | Zfp827        | zinc finger protein 827                                                       | BB111712  | 5.4116  | 3.9701  | 1.4415 |
| 1440011_at   |               |                                                                               | AV228877  | 7.1374  | 5.6970  | 1.4404 |
| 1450413_at   | Pdgfb         | platelet derived growth factor, B polypeptide                                 | BC023427  | 5.5434  | 4.1035  | 1.4399 |
| 1437122_at   |               |                                                                               | BM119782  | 6.7699  | 5.3301  | 1.4398 |

|              |               |                                                                       |           |         |         |        |
|--------------|---------------|-----------------------------------------------------------------------|-----------|---------|---------|--------|
| 1431772_a_at | Itsn2         | intersectin 2                                                         | AK015445  | 7.6597  | 6.2200  | 1.4397 |
| 1416980_at   | Mettl7b       | methyltransferase like 7B                                             | NM_027853 | 5.9820  | 4.5428  | 1.4393 |
| 1417574_at   | Cxcl12        | chemokine (C-X-C motif) ligand 12                                     | NM_013655 | 5.3415  | 3.9024  | 1.4391 |
| 1416337_at   | Uqcrb         | ubiquinol-cytochrome c reductase binding protein                      | NM_026219 | 10.7915 | 9.3526  | 1.4389 |
| 1420970_at   | Adcy7         | adenylate cyclase 7                                                   | NM_007406 | 6.4041  | 4.9657  | 1.4383 |
| 1439093_at   | Hspa4l        | heat shock protein 4 like                                             | BB270852  | 8.7303  | 7.2935  | 1.4368 |
| 1450678_at   | Itgb2         | integrin beta 2                                                       | NM_008404 | 6.0489  | 4.6127  | 1.4362 |
| 1419648_at   | Myo1c         | myosin IC                                                             | NM_008659 | 9.6072  | 8.1710  | 1.4362 |
| 1439633_at   | Syt7          | synaptotagmin VII                                                     | BQ175636  | 6.7415  | 5.3054  | 1.4361 |
| 1425154_a_at | Csf1          | colony stimulating factor 1 (macrophage)                              | M21149    | 7.7180  | 6.2831  | 1.4349 |
| 1422661_at   | Lgals8        | lectin, galactose binding, soluble 8                                  | AI987967  | 7.7550  | 6.3206  | 1.4344 |
| 1448059_at   | Mipol1        | mirror-image polydactyly gene 1 homolog (human)                       | BE655476  | 5.6676  | 4.2333  | 1.4343 |
| 1452058_a_at | Rnf11         | ring finger protein 11                                                | BI150320  | 9.3485  | 7.9147  | 1.4337 |
| 1431708_a_at | Tia1          | cytotoxic granule-associated RNA binding protein 1                    | AK009502  | 7.5840  | 6.1510  | 1.4331 |
| 1451110_at   | Egln1         | EGL nine homolog 1 (C. elegans)                                       | BE995700  | 9.3551  | 7.9241  | 1.4310 |
| 1429335_at   | Snapc1        | small nuclear RNA activating complex, polypeptide 1                   | AK012317  | 8.7520  | 7.3211  | 1.4309 |
| 1449096_at   | Ccdc127       | coiled-coil domain containing 127                                     | NM_024201 | 9.6104  | 8.1799  | 1.4306 |
| 1448037_at   | Zcchc6        | zinc finger, CCHC domain containing 6                                 | BI695361  | 7.1270  | 5.6970  | 1.4300 |
| 1445881_at   | 2310035P21Rik | RIKEN cDNA 2310035P21 gene                                            | BG230003  | 6.4843  | 5.0544  | 1.4299 |
| 1448663_s_at | Mvd           | mevalonate (diphospho) decarboxylase                                  | NM_138656 | 9.3509  | 7.9213  | 1.4296 |
| 1423918_at   | Rhbdd1        | rhomboid domain containing 1                                          | BC005518  | 9.6261  | 8.1974  | 1.4287 |
| 1449107_at   | Nudt4         | nudix (nucleoside diphosphate linked moiety X)-type motif 4           | NM_027722 | 10.0899 | 8.6613  | 1.4286 |
| 1455727_at   | Zrsr2         | zinc finger (CCCH type), RNA binding motif and serine/arginine rich 2 | AW542140  | 9.9937  | 8.5656  | 1.4281 |
| 1443513_at   |               |                                                                       | BM243733  | 7.5990  | 6.1711  | 1.4279 |
| 1422906_at   | Abcg2         | ATP-binding cassette, sub-family G (WHITE), member 2                  | NM_011920 | 11.0993 | 9.6716  | 1.4277 |
| 1434774_at   | Rhbdf2        | rhomboid 5 homolog 2 (Drosophila)                                     | BB005249  | 7.7822  | 6.3554  | 1.4268 |
| 1457470_at   |               |                                                                       | BG067509  | 6.7309  | 5.3054  | 1.4255 |
| 1455812_x_at | Vasn          | vasorin                                                               | BB530515  | 10.3438 | 8.9185  | 1.4253 |
| 1441976_at   | 5430434G16Rik | RIKEN cDNA 5430434G16 gene                                            | AU040386  | 7.0609  | 5.6357  | 1.4253 |
| 1459171_at   | Emp1          | epithelial membrane protein 1                                         | BG075300  | 7.5422  | 6.1176  | 1.4246 |
| 1456072_at   | Ppp1r9a       | protein phosphatase 1, regulatory (inhibitor) subunit 9A              | AU067663  | 5.3163  | 3.8923  | 1.4240 |
| 1437989_at   | Pde8b         | phosphodiesterase 8B                                                  | BB357157  | 7.7251  | 6.3015  | 1.4236 |
| 1430427_a_at | Pcdh18        | protocadherin 18                                                      | AK014140  | 6.6941  | 5.2716  | 1.4225 |
| 1427405_s_at | Rab11fip5     | RAB11 family interacting protein 5 (class I)                          | BF682225  | 7.9736  | 6.5517  | 1.4219 |
| 1428374_at   | Glce          | glucuronyl C5-epimerase                                               | AK003758  | 9.7537  | 8.3333  | 1.4204 |
| 1423355_at   | Snap29        | synaptosomal-associated protein 29                                    | BF682880  | 7.0885  | 5.6689  | 1.4196 |
| 1435589_at   | Ccdc85b       | coiled-coil domain containing 85B                                     | AV308222  | 9.5198  | 8.1009  | 1.4189 |
| 1437862_at   | Rbm25         | RNA binding motif protein 25                                          | AI159652  | 9.6077  | 8.1892  | 1.4185 |
| 1435031_at   | Tmem120a      | transmembrane protein 120A                                            | AV069499  | 9.4344  | 8.0161  | 1.4183 |
| 1417541_at   | Hells         | helicase, lymphoid specific                                           | NM_008234 | 10.6832 | 9.2655  | 1.4177 |
| 1429234_s_at | 11-Sep        | septin 11                                                             | BM120495  | 11.1592 | 9.7416  | 1.4176 |
| 1456478_at   | Pgm2l1        | phosphoglucomutase 2-like 1                                           | BB183423  | 7.5094  | 6.0926  | 1.4169 |
| 1433570_s_at | Naa35         | N(alpha)-acetyltransferase 35, NatC auxiliary subunit                 | BG083730  | 9.5841  | 8.1683  | 1.4158 |
| 1455542_at   | C630043F03Rik | RIKEN cDNA C630043F03 gene                                            | BB226174  | 6.3729  | 4.9573  | 1.4156 |
| 1416818_at   | Parva         | parvin, alpha                                                         | NM_020606 | 8.9263  | 7.5111  | 1.4152 |
| 1435754_at   | Zyg11b        | zyg-II homolog B (C. elegans)                                         | BQ180736  | 9.3870  | 7.9720  | 1.4150 |
| 1424746_at   | Kif1c         | kinesin family member 1C                                              | BC016221  | 9.7524  | 8.3378  | 1.4146 |
| 1427809_at   |               |                                                                       | BC010480  | 5.9119  | 4.4990  | 1.4129 |
| 1436507_at   | Irak2         | interleukin-1 receptor-associated kinase 2                            | AV241470  | 7.8191  | 6.4073  | 1.4119 |
| 1438345_at   |               |                                                                       | BM293643  | 6.8362  | 5.4244  | 1.4118 |
| 1437308_s_at | F2r           | coagulation factor II (thrombin) receptor                             | AV024285  | 11.8692 | 10.4595 | 1.4097 |
| 1429216_at   | Paqr3         | progesterin and adipoQ receptor family member                         | AK018174  | 6.8714  | 5.4621  | 1.4092 |
| 1429633_at   | Lcor          | ligand dependent nuclear receptor corepressor                         | AK014072  | 8.4299  | 7.0209  | 1.4090 |
| 1429477_at   | Ncaph2        | non-SMC condensin II complex, subunit H2                              | AW556269  | 7.9201  | 6.5111  | 1.4090 |
| 1421965_s_at | Notch3        | notch 3                                                               | NM_008716 | 6.3284  | 4.9195  | 1.4089 |
| 1452741_s_at | Gpd2          | glycerol phosphate dehydrogenase 2, mitochondrial                     | BQ175968  | 9.2067  | 7.7979  | 1.4088 |

|              |               |                                                                    |           |         |        |        |
|--------------|---------------|--------------------------------------------------------------------|-----------|---------|--------|--------|
| 1422134_at   | Fosb          | FBJ osteosarcoma oncogene B                                        | NM_008036 | 6.4952  | 5.0865 | 1.4087 |
| 1441660_at   | Actr2         | ARP2 actin-related protein 2                                       | AV351863  | 5.9357  | 4.5281 | 1.4076 |
| 1459993_at   |               |                                                                    | AV233983  | 5.5120  | 4.1049 | 1.4072 |
| 1417240_at   | Zyx           | zyxin                                                              | NM_011777 | 8.7925  | 7.3855 | 1.4070 |
| 1449163_at   | Sigirr        | single immunoglobulin and toll-interleukin 1 receptor (TIR) domain | NM_023059 | 9.1936  | 7.7871 | 1.4065 |
| 1437508_at   | Sp4           | trans-acting transcription factor 4                                | AI324972  | 5.5132  | 4.1068 | 1.4064 |
| 1448721_at   | D1Ert622e     | DNA segment, Chr 1, ERATO Doi 622, expressed                       | NM_133825 | 8.4050  | 6.9986 | 1.4064 |
| 1417856_at   | Relb          | avian reticuloendotheliosis viral (v-rel) oncogene related B       | NM_009046 | 8.2615  | 6.8564 | 1.4051 |
| 1453021_at   | Stxbp5        | syntaxin binding protein 5 (tomosyn)                               | BM899291  | 7.3328  | 5.9277 | 1.4051 |
| 1451959_a_at | Vegfa         | vascular endothelial growth factor A                               | U50279    | 7.4310  | 6.0270 | 1.4040 |
| 1431031_at   | Arid4b        | AT rich interactive domain 4B (RBP1-like)                          | BE286482  | 6.0489  | 4.6475 | 1.4015 |
| 1424296_at   | Gclc          | glutamate-cysteine ligase, catalytic subunit                       | BC019374  | 9.9827  | 8.5817 | 1.4010 |
| 1455863_at   | Spata5l1      | spermatogenesis associated 5-like 1                                | AW215442  | 8.2314  | 6.8306 | 1.4008 |
| 1429849_at   | Kansl3        | KAT8 regulatory NSL complex subunit 3                              | AI647574  | 7.4494  | 6.0489 | 1.4005 |
| 1442295_at   | Arcp2         | actin related protein 2/3 complex, subunit 2                       | BM244229  | 5.6970  | 4.2966 | 1.4003 |
| 1456225_x_at | Trib3         | tribbles homolog 3 (Drosophila)                                    | BB508622  | 9.2804  | 7.8819 | 1.3985 |
| 1426663_s_at | Slc45a3       | solute carrier family 45, member 3                                 | BC024519  | 5.0487  | 3.6503 | 1.3983 |
| 1432162_s_at | Ptar1         | protein prenyltransferase alpha subunit repeat containing 1        | AK006988  | 6.0270  | 4.6287 | 1.3983 |
| 1439063_at   | Asxl2         | additional sex combs like 2 (Drosophila)                           | BM231855  | 8.3304  | 6.9332 | 1.3972 |
| 1425022_at   | Usp3          | ubiquitin specific peptidase 3                                     | BM936366  | 9.4072  | 8.0105 | 1.3966 |
| 1429104_at   | Limd2         | LIM domain containing 2                                            | AK012581  | 8.8493  | 7.4530 | 1.3963 |
| 1451277_at   | Zadh2         | zinc binding alcohol dehydrogenase, domain containing 2            | BC025897  | 10.0939 | 8.6988 | 1.3951 |
| 1426124_a_at | Clk1          | CDC-like kinase 1                                                  | U21209    | 10.9077 | 9.5128 | 1.3949 |
| 1458296_at   |               |                                                                    | BI465650  | 6.5385  | 5.1460 | 1.3925 |
| 1429564_at   | Pcgf5         | polycomb group ring finger 5                                       | AK002387  | 10.4808 | 9.0889 | 1.3919 |
| 1451533_at   | BC022687      | cDNA sequence BC022687                                             | BC022687  | 7.4693  | 6.0777 | 1.3916 |
| 1456759_at   | Lrrc4c        | leucine rich repeat containing 4C                                  | BE953888  | 5.1383  | 3.7472 | 1.3911 |
| 1454876_at   | Rab23         | RAB23, member RAS oncogene family                                  | BB771587  | 7.5915  | 6.2005 | 1.3910 |
| 1427844_a_at | Cebpb         | CCAAT/enhancer binding protein (C/EBP), beta                       | AB012278  | 9.5332  | 8.1423 | 1.3909 |
| 1418481_at   | Pkmyt1        | protein kinase, membrane associated tyrosine/threonine 1           | NM_023058 | 9.3738  | 7.9830 | 1.3908 |
| 1448487_at   | Lrrfp1        | leucine rich repeat (in FLII) interacting protein 1                | NM_008515 | 8.8076  | 7.4168 | 1.3908 |
| 1422082_a_at | Nfya          | nuclear transcription factor-Y alpha                               | NM_010913 | 5.9073  | 4.5173 | 1.3899 |
| 1451924_a_at | Edn1          | endothelin 1                                                       | D43775    | 6.3953  | 5.0054 | 1.3899 |
| 1432850_at   | 5430434G16Rik | RIKEN cDNA 5430434G16 gene                                         | AK017390  | 7.0861  | 5.6970 | 1.3892 |
| 1429617_at   | Cyld          | cylindromatosis (turban tumor syndrome)                            | BM119209  | 8.5970  | 7.2078 | 1.3891 |
| 1420725_at   | Tmlhe         | trimethyllysine hydroxylase, epsilon                               | AY033513  | 6.6941  | 5.3054 | 1.3887 |
| 1434410_at   | Crybg3        | beta-gamma crystallin domain containing 3                          | AV276428  | 6.2680  | 4.8797 | 1.3884 |
| 1423314_s_at | Pde7a         | phosphodiesterase 7A                                               | BG070255  | 7.7998  | 6.4135 | 1.3863 |
| 1419568_at   | Mapk1         | mitogen-activated protein kinase 1                                 | NM_011949 | 10.1867 | 8.8005 | 1.3862 |
| 1438312_s_at |               |                                                                    | BB324823  | 10.9779 | 9.5920 | 1.3860 |
| 1422889_at   | Pcdh18        | protocadherin 18                                                   | BM218630  | 9.0896  | 7.7042 | 1.3855 |
| 1426721_s_at | Tiparp        | TCDD-inducible poly(ADP-ribose) polymerase                         | BB707122  | 11.0337 | 9.6496 | 1.3841 |
| 1427703_at   | Pafah1b1      | platelet-activating factor acetylhydrolase, isoform 1b, subunit 1  | L25109    | 7.5434  | 6.1607 | 1.3826 |
| 1460290_at   | Lpin2         | lipin 2                                                            | NM_022882 | 6.5111  | 5.1285 | 1.3826 |
| 1452890_at   | Tll5          | tubulin tyrosine ligase-like family, member 5                      | AK009255  | 8.9586  | 7.5765 | 1.3821 |
| 1434303_at   | Raph1         | Ras association (RalGDS/AF-6) and pleckstrin homology domains 1    | AV307311  | 8.7589  | 7.3768 | 1.3821 |
| 1448834_at   | Foxm1         | forkhead box M1                                                    | NM_008021 | 8.6662  | 7.2842 | 1.3820 |
| 1418829_a_at | Eno2          | enolase 2, gamma neuronal                                          | NM_013509 | 7.6211  | 6.2392 | 1.3819 |
| 1452969_at   | Atp2b1        | ATPase, Ca++ transporting, plasma membrane 1                       | BI080417  | 9.0556  | 7.6739 | 1.3817 |
| 1450061_at   | Enc1          | ectodermal-neural cortex 1                                         | BM120053  | 10.0456 | 8.6649 | 1.3807 |
| 1439541_at   | 4930414L22Rik | RIKEN cDNA 4930414L22 gene                                         | BQ176011  | 5.8781  | 4.4990 | 1.3791 |
| 1453824_at   | Trmt13        | tRNA methyltransferase 13 homolog (S. cerevisiae)                  | BG085812  | 7.0755  | 5.6970 | 1.3785 |
| 1456005_a_at | Bcl2l11       | BCL2-like 11 (apoptosis facilitator)                               | BB667581  | 8.5007  | 7.1236 | 1.3771 |
| 1426987_at   | 5430417L22Rik | RIKEN cDNA 5430417L22 gene                                         | BB028755  | 7.7415  | 6.3648 | 1.3767 |
| 1451234_at   | Fam193b       | family with sequence similarity 193, member B                      | BC021381  | 8.4446  | 7.0683 | 1.3763 |
| 1435274_at   |               |                                                                    | BQ175341  | 8.5231  | 7.1485 | 1.3746 |

|              |               |                                                                            |           |         |         |        |
|--------------|---------------|----------------------------------------------------------------------------|-----------|---------|---------|--------|
| 1456784_at   | Gm14137       | predicted gene 14137                                                       | BB011034  | 6.5001  | 5.1256  | 1.3745 |
| 1450044_at   | Fzd7          | frizzled homolog 7 (Drosophila)                                            | NM_008057 | 9.5560  | 8.1817  | 1.3743 |
| 1422567_at   | Fam129a       | family with sequence similarity 129, member A                              | NM_022018 | 8.4914  | 7.1176  | 1.3737 |
| 1427225_at   | Epn2          | epsin 2                                                                    | AF057286  | 9.7513  | 8.3776  | 1.3737 |
| 1424378_at   | Ldlrap1       | low density lipoprotein receptor adaptor protein 1                         | BC021467  | 7.9000  | 6.5268  | 1.3732 |
| 1456036_x_at | Gsto1         | glutathione S-transferase omega 1                                          | AV003026  | 11.6812 | 10.3082 | 1.3730 |
| 1438041_at   | Pde7a         | phosphodiesterase 7A                                                       | BG963325  | 8.3946  | 7.0220  | 1.3727 |
| 1417348_at   | 2310039H08Rik | RIKEN cDNA 2310039H08 gene                                                 | NM_025966 | 10.0515 | 8.6790  | 1.3725 |
| 1442832_at   | Ankrd52       | ankyrin repeat domain 52                                                   | AV344312  | 7.1383  | 5.7664  | 1.3719 |
| 1440250_at   | Col4a4        | collagen, type IV, alpha 4                                                 | BM121658  | 5.4750  | 4.1035  | 1.3716 |
| 1441129_at   |               |                                                                            | BB155713  | 5.3414  | 3.9701  | 1.3713 |
| 1448657_a_at | Dnajb2        | DnaJ (Hsp40) homolog, subfamily B, member 2                                | NM_020266 | 8.8070  | 7.4364  | 1.3705 |
| 1448861_at   | Traf5         | TNF receptor-associated factor 5                                           | NM_011633 | 7.6015  | 6.2313  | 1.3702 |
| 1459884_at   | Cox7c         | cytochrome c oxidase, subunit VIIc                                         | AA190297  | 5.8864  | 4.5164  | 1.3701 |
| 1453145_at   | Pisd-ps3      | phosphatidylserine decarboxylase, pseudogene 3                             | AK007420  | 9.0219  | 7.6525  | 1.3693 |
| 1422184_a_at | Ak1           | adenylate kinase 1                                                         | NM_021515 | 9.1795  | 7.8106  | 1.3689 |
| 1415944_at   | Sdc1          | syndecan 1                                                                 | BI788645  | 8.4173  | 7.0503  | 1.3670 |
| 1435526_at   | Tor1aip2      | torsin A interacting protein 2                                             | BM248600  | 9.6998  | 8.3333  | 1.3665 |
| 1452837_at   | Lpin2         | lipin 2                                                                    | AK021389  | 8.7258  | 7.3594  | 1.3664 |
| 1420726_x_at | Tmlhe         | trimethyllysine hydroxylase, epsilon                                       | AY033513  | 6.7313  | 5.3651  | 1.3663 |
| 1449852_a_at | Ehd4          | EH-domain containing 4                                                     | NM_133838 | 9.5417  | 8.1755  | 1.3661 |
| 1419652_s_at | Nkain1        | Na <sup>+</sup> /K <sup>+</sup> transporting ATPase interacting 1          | AK009389  | 7.4774  | 6.1119  | 1.3655 |
| 1429264_at   | Fam120aos     | family with sequence similarity 120A opposite strand                       | AK021143  | 7.6307  | 6.2654  | 1.3652 |
| 1437790_at   | Emi5          | echinoderm microtubule associated protein like 5                           | AV230748  | 5.4443  | 4.0796  | 1.3648 |
| 1449544_a_at | Kcnh2         | potassium voltage-gated channel, subfamily H (eag-related), member 2       | NM_013569 | 7.0607  | 5.6970  | 1.3638 |
| 1448914_a_at | Csf1          | colony stimulating factor 1 (macrophage)                                   | BM233698  | 8.6040  | 7.2404  | 1.3636 |
| 1439477_at   |               |                                                                            | BB047737  | 9.3966  | 8.0331  | 1.3635 |
| 1437296_at   | Pkn2          | protein kinase N2                                                          | AI507382  | 8.9461  | 7.5840  | 1.3620 |
| 1445689_at   |               |                                                                            | AA717264  | 6.5268  | 5.1653  | 1.3615 |
| 1451127_at   | Vopp1         | vesicular, overexpressed in cancer, prosurvival protein 1                  | BC024822  | 8.2538  | 6.8924  | 1.3614 |
| 1417126_a_at | Rpl22l1       | ribosomal protein L22 like 1                                               | NM_026517 | 12.2622 | 10.9013 | 1.3609 |
| 1445781_at   |               |                                                                            | BG072274  | 6.4574  | 5.0970  | 1.3604 |
| 1455810_a_at | Arhgef40      | Rho guanine nucleotide exchange factor (GEF) 40                            | BI412259  | 6.9214  | 5.5610  | 1.3604 |
| 1444754_at   | Asxl2         | additional sex combs like 2 (Drosophila)                                   | BB761239  | 6.0270  | 4.6674  | 1.3595 |
| 1443375_at   | Gnas          | GNAS (guanine nucleotide binding protein, alpha stimulating) complex locus | BM239335  | 5.7245  | 4.3656  | 1.3589 |
| 1424022_at   | Osgin1        | oxidative stress induced growth inhibitor 1                                | BC022135  | 7.4361  | 6.0777  | 1.3584 |
| 1421784_a_at | Efna4         | ephrin A4                                                                  | NM_007910 | 7.2935  | 5.9357  | 1.3578 |
| 1438888_at   | Gmcl1         | germ cell-less homolog 1 (Drosophila)                                      | BM239632  | 5.3765  | 4.0191  | 1.3575 |
| 1442072_at   | C230081A13Rik | RIKEN cDNA C230081A13 gene                                                 | BM227237  | 6.6255  | 5.2685  | 1.3570 |
| 1439034_at   | Spn           | sialophorin                                                                | BB160586  | 6.1125  | 4.7568  | 1.3557 |
| 1432054_at   | Golga1        | golgi autoantigen, golgin subfamily a, 1                                   | AK008972  | 5.9119  | 4.5566  | 1.3553 |
| 1422890_at   | Pcdh18        | protocadherin 18                                                           | BM218630  | 9.0663  | 7.7111  | 1.3552 |
| 1451190_a_at | Sbk1          | SH3-binding kinase 1                                                       | BC025837  | 7.1763  | 5.8212  | 1.3551 |
| 1423319_at   | Hhex          | hematopoietically expressed homeobox                                       | AK014111  | 7.1586  | 5.8041  | 1.3545 |
| 1440217_at   | Fam169b       | family with sequence similarity 169, member B                              | AI931774  | 5.2567  | 3.9026  | 1.3542 |
| 1418357_at   | Foxg1         | forkhead box G1                                                            | NM_008241 | 10.9505 | 9.5972  | 1.3533 |
| 1449551_at   | Myo1c         | myosin IC                                                                  | NM_008659 | 7.4308  | 6.0777  | 1.3531 |
| 1453775_at   | Rictor        | RPTOR independent companion of MTOR, complex 2                             | AI508470  | 7.4308  | 6.0777  | 1.3531 |
| 1454671_at   | Insig1        | insulin induced gene 1                                                     | BB005488  | 11.3509 | 9.9982  | 1.3526 |
| 1436725_at   | E130306D19Rik | RIKEN cDNA E130306D19 gene                                                 | BM226118  | 8.1710  | 6.8186  | 1.3524 |
| 1425195_a_at |               |                                                                            | AF356876  | 9.9524  | 8.6007  | 1.3517 |
| 1428066_at   | Ccdc120       | coiled-coil domain containing 120                                          | AK009768  | 6.6564  | 5.3054  | 1.3510 |
| 1427318_s_at | Myof          | myoferlin                                                                  | BI555209  | 10.0106 | 8.6613  | 1.3493 |
| 1433623_at   | Zfp367        | zinc finger protein 367                                                    | BE629588  | 9.8386  | 8.4900  | 1.3486 |
| 1460610_at   | Agbl5         | ATP/GTP binding protein-like 5                                             | BG143491  | 6.6170  | 5.2685  | 1.3485 |
| 1428936_at   | Atp2b1        | ATPase, Ca <sup>++</sup> transporting, plasma membrane 1                   | BI080417  | 9.0704  | 7.7220  | 1.3484 |

|              |               |                                                                   |           |         |         |        |
|--------------|---------------|-------------------------------------------------------------------|-----------|---------|---------|--------|
| 1441513_at   | Tank          | TRAF family member-associated Nf-kappa B activator                | BB040938  | 6.3587  | 5.0107  | 1.3480 |
| 1423324_at   | Pnn           | pinin                                                             | AV135835  | 11.0543 | 9.7084  | 1.3459 |
| 1448655_at   | Lrp1          | low density lipoprotein receptor-related protein 1                | NM_008512 | 8.4032  | 7.0575  | 1.3456 |
| 1435143_at   | Elk3          | ELK3, member of ETS oncogene family                               | BB825801  | 8.4548  | 7.1095  | 1.3453 |
| 1425686_at   | Cflar         | CASP8 and FADD-like apoptosis regulator                           | BE284491  | 8.2547  | 6.9094  | 1.3453 |
| 1435066_at   | Pitpnc1       | phosphatidylinositol transfer protein, cytoplasmic 1              | BB305507  | 6.7217  | 5.3764  | 1.3452 |
| 1459592_a_at | Ppp1r13l      | protein phosphatase 1, regulatory (inhibitor) subunit 13 like     | BB752796  | 7.8022  | 6.4574  | 1.3449 |
| 1451353_at   | Tm6sf1        | transmembrane 6 superfamily member 1                              | AV378394  | 5.8042  | 4.4597  | 1.3445 |
| 1417179_at   | Tspan5        | tetraspanin 5                                                     | NM_019571 | 7.8234  | 6.4798  | 1.3437 |
| 1439484_at   | Pde7a         | phosphodiesterase 7A                                              | BM245060  | 8.7689  | 7.4256  | 1.3433 |
| 1449010_at   | Hspa4l        | heat shock protein 4 like                                         | NM_011020 | 9.2886  | 7.9457  | 1.3429 |
| 1424573_at   | Tmed5         | transmembrane emp24 protein transport domain containing 5         | BC020076  | 10.0578 | 8.7150  | 1.3429 |
| 1439388_s_at | Bcar1         | breast cancer anti-estrogen resistance 1                          | BB251739  | 10.4759 | 9.1332  | 1.3427 |
| 1420636_a_at | Dusp12        | dual specificity phosphatase 12                                   | NM_023173 | 8.3846  | 7.0422  | 1.3424 |
| 1424669_at   | Zfyve21       | zinc finger, FYVE domain containing 21                            | BC019521  | 8.3585  | 7.0161  | 1.3424 |
| 1448797_at   | Elk3          | ELK3, member of ETS oncogene family                               | BC005686  | 10.2446 | 8.9023  | 1.3423 |
| 1424670_s_at | Zfyve21       | zinc finger, FYVE domain containing 21                            | BC019521  | 9.8235  | 8.4820  | 1.3415 |
| 1424517_at   | Ccdc12        | coiled-coil domain containing 12                                  | BC026668  | 8.1114  | 6.7702  | 1.3412 |
| 1427915_s_at | Tceb1         | transcription elongation factor B (SIII), polypeptide 1           | AI019214  | 5.5658  | 4.2249  | 1.3409 |
| 1442700_at   | Pde4b         | phosphodiesterase 4B, cAMP specific                               | BG793493  | 5.4443  | 4.1035  | 1.3409 |
| 1424128_x_at | Aurkb         | aurora kinase B                                                   | BC003261  | 10.7954 | 9.4564  | 1.3390 |
| 1417828_at   | Aqp8          | aquaporin 8                                                       | NM_007474 | 5.6970  | 4.3588  | 1.3382 |
| 1424071_s_at | BC018507      | cDNA sequence BC018507                                            | BC018507  | 9.7637  | 8.4257  | 1.3380 |
| 1428408_a_at | Esy2          | extended synaptotagmin-like protein 2                             | BI102044  | 9.9184  | 8.5807  | 1.3377 |
| 1431561_a_at | Dhx34         | DEAH (Asp-Glu-Ala-His) box polypeptide 34                         | AK007461  | 8.8070  | 7.4693  | 1.3376 |
| 1455987_at   | Sec61a1       | Sec61 alpha 1 subunit (S. cerevisiae)                             | BF148622  | 7.3417  | 6.0047  | 1.3370 |
| 1455998_at   | Zbed6         | zinc finger, BED domain containing 6                              | BM232738  | 7.2723  | 5.9357  | 1.3367 |
| 1446969_at   |               |                                                                   | BM237522  | 5.1246  | 3.7880  | 1.3367 |
| 1428321_at   | Eml1          | echinoderm microtubule associated protein like 1                  | AK003593  | 7.7607  | 6.4242  | 1.3366 |
| 1459495_at   |               |                                                                   | BG075346  | 5.8350  | 4.4990  | 1.3360 |
| 1420964_at   | Enc1          | ectodermal-neural cortex 1                                        | BM120053  | 5.8348  | 4.4990  | 1.3358 |
| 1452397_at   | 2810474O19Rik | RIKEN cDNA 2810474O19 gene                                        | BE196832  | 6.8852  | 5.5495  | 1.3357 |
| 1441677_at   |               |                                                                   | BM244144  | 8.2119  | 6.8770  | 1.3349 |
| 1424365_at   | 1810037117Rik | RIKEN cDNA 1810037117 gene                                        | BC002135  | 11.9111 | 10.5772 | 1.3338 |
| 1455381_at   | Marf1         | meiosis arrest female 1                                           | AV254721  | 9.6590  | 8.3255  | 1.3335 |
| 1423804_a_at |               |                                                                   | BC004801  | 10.3014 | 8.9683  | 1.3330 |
| 1451221_at   | BC018507      | cDNA sequence BC018507                                            | BC018507  | 8.6872  | 7.3561  | 1.3312 |
| 1456761_at   | D630030B22Rik | RIKEN cDNA D630030B22 gene                                        | BB500664  | 5.1191  | 3.7880  | 1.3311 |
| 1429822_at   | 4633401B06Rik | RIKEN cDNA 4633401B06 gene                                        | AK014609  | 5.8297  | 4.4990  | 1.3307 |
| 1417190_at   | Nampt         | nicotinamide phosphoribosyltransferase                            | AW989410  | 10.6121 | 9.2819  | 1.3303 |
| 1439799_at   |               |                                                                   | BE953350  | 6.1028  | 4.7725  | 1.3302 |
| 1427527_a_at | Pthlh         | parathyroid hormone-like peptide                                  | BI685341  | 5.2306  | 3.9024  | 1.3282 |
| 1440846_at   | Scai          | suppressor of cancer cell invasion                                | BB430553  | 5.8297  | 4.5015  | 1.3282 |
| 1456047_at   | Pla2g4b       | phospholipase A2, group IVB (cytosolic)                           | BB151104  | 5.6862  | 4.3588  | 1.3274 |
| 1416410_at   | Pafah1b3      | platelet-activating factor acetylhydrolase, isoform 1b, subunit 3 | NM_008776 | 10.6356 | 9.3083  | 1.3273 |
| 1442085_at   | Whsc111       | Wolf-Hirschhorn syndrome candidate 1-like 1 (human)               | BM053251  | 7.1485  | 5.8212  | 1.3272 |
| 1429536_at   | Fam83g        | family with sequence similarity 83, member G                      | AK009716  | 5.1152  | 3.7880  | 1.3272 |
| 1430367_at   | Stambpl1      | STAM binding protein like 1                                       | BE331859  | 6.5578  | 5.2306  | 1.3272 |
| 1435955_at   | Siglecg       | sialic acid binding Ig-like lectin G                              | BE447170  | 6.3373  | 5.0107  | 1.3266 |
| 1433518_at   | Lcmt2         | leucine carboxyl methyltransferase 2                              | BM120022  | 5.0103  | 3.6837  | 1.3266 |
| 1429106_at   |               |                                                                   | AK014853  | 8.7654  | 7.4391  | 1.3262 |
| 1450720_at   | Acp1          | acid phosphatase 1, soluble                                       | AW554436  | 11.6582 | 10.3326 | 1.3256 |
| 1432421_at   | Pms2          | postmeiotic segregation increased 2 (S. cerevisiae)               | AK014190  | 6.7815  | 5.4569  | 1.3246 |
| 1428604_at   | 2610305D13Rik | RIKEN cDNA 2610305D13 gene                                        | AK011986  | 6.7353  | 5.4108  | 1.3244 |
| 1422028_a_at | Ets1          | E26 avian leukemia oncogene 1, 5' domain                          | BC010588  | 7.1280  | 5.8041  | 1.3239 |
| 1430522_a_at | Vamp5         | vesicle-associated membrane protein 5                             | AK009266  | 9.7311  | 8.4074  | 1.3237 |
| 1448079_at   | Rnf166        | ring finger protein 166                                           | BB870298  | 6.3052  | 4.9817  | 1.3236 |



|              |               |                                                                                                |           |         |         |        |
|--------------|---------------|------------------------------------------------------------------------------------------------|-----------|---------|---------|--------|
| 1430339_at   | Efcab11       | EF-hand calcium binding domain 11                                                              | AK011507  | 6.7665  | 5.4443  | 1.3222 |
| 1443500_at   |               |                                                                                                | BB098429  | 6.2879  | 4.9657  | 1.3221 |
| 1436352_at   | Cep78         | centrosomal protein 78                                                                         | BF226994  | 6.4867  | 5.1653  | 1.3214 |
| 1459307_at   |               |                                                                                                | BB460274  | 6.5111  | 5.1918  | 1.3193 |
| 1460671_at   | Gpx1          | glutathione peroxidase 1                                                                       | BI219063  | 12.3945 | 11.0752 | 1.3193 |
| 1437780_at   | Fancb         | Fanconi anemia, complementation group B                                                        | AV222467  | 8.4879  | 7.1687  | 1.3193 |
| 1426156_at   | Lats2         | large tumor suppressor 2                                                                       | AY015062  | 6.1903  | 4.8719  | 1.3184 |
| 1422470_at   | Bnip3         | BCL2/adenovirus E1B interacting protein 3                                                      | NM_009760 | 11.6516 | 10.3333 | 1.3183 |
| 1453332_at   | 2410002O22Rik | RIKEN cDNA 2410002O22 gene                                                                     | AK012141  | 7.9061  | 6.5881  | 1.3180 |
| 1433682_at   | Arhgef17      | Rho guanine nucleotide exchange factor (GEF)<br>17                                             | BE287052  | 8.3569  | 7.0394  | 1.3175 |
| 1424940_s_at | BC022687      | cDNA sequence BC022687                                                                         | BC022687  | 7.4964  | 6.1807  | 1.3156 |
| 1441437_at   |               |                                                                                                | BM119933  | 6.0360  | 4.7207  | 1.3153 |
| 1422668_at   | Serpib9b      | serine (or cysteine) peptidase inhibitor, clade B,<br>member 9b                                | NM_011452 | 6.6564  | 5.3414  | 1.3150 |
| 1452322_a_at | Brwd1         | bromodomain and WD repeat domain<br>containing 1                                               | BM230348  | 6.6564  | 5.3414  | 1.3150 |
| 1456483_at   | Zfp9          | zinc finger protein 9                                                                          | BB008902  | 9.0192  | 7.7042  | 1.3150 |
| 1449336_a_at | Slk           | STE20-like kinase                                                                              | NM_009289 | 8.7956  | 7.4811  | 1.3144 |
| 1454018_at   | Tlk2          | tousled-like kinase 2 (Arabidopsis)                                                            | AK014829  | 9.2940  | 7.9796  | 1.3144 |
| 1450025_at   | Pard6g        | par-6 partitioning defective 6 homolog gamma<br>(C. elegans)                                   | NM_053117 | 5.6110  | 4.2966  | 1.3144 |
| 1435077_at   | Asxl1         | additional sex combs like 1                                                                    | BE956516  | 8.8826  | 7.5689  | 1.3137 |
| 1425902_a_at | Nfkb2         | nuclear factor of kappa light polypeptide gene<br>enhancer in B cells 2, p49/p100              | AF155372  | 8.7298  | 7.4168  | 1.3130 |
| 1434339_at   | Fnbp1l        | formin binding protein 1-like                                                                  | AW548221  | 10.1706 | 8.8576  | 1.3130 |
| 1445322_x_at |               |                                                                                                | BG063377  | 9.0081  | 7.6954  | 1.3127 |
| 1426688_at   | Sdha          | succinate dehydrogenase complex, subunit A,<br>flavoprotein (Fp)                               | BF585357  | 11.1726 | 9.8604  | 1.3122 |
| 1425357_a_at | Grem1         | gremlin 1                                                                                      | BC015293  | 5.2211  | 3.9091  | 1.3120 |
| 1439631_at   | Zcchc11       | zinc finger, CCHC domain containing 11                                                         | BG060248  | 6.1833  | 4.8719  | 1.3115 |
| 1417303_at   | Mvd           | mevalonate (diphospho) decarboxylase                                                           | NM_138656 | 9.1086  | 7.7979  | 1.3107 |
| 1424456_at   | Pvrl2         | poliovirus receptor-related 2                                                                  | BC009088  | 8.1660  | 6.8564  | 1.3095 |
| 1439978_at   | Srcap         | Snf2-related CREBBP activator protein                                                          | BG070570  | 5.7686  | 4.4597  | 1.3090 |
| 1435284_at   | Rtn4          | reticulon 4                                                                                    | BB648600  | 8.1859  | 6.8770  | 1.3089 |
| 1430228_at   | Dtl           | denticleless homolog (Drosophila)                                                              | AV308327  | 7.6064  | 6.2976  | 1.3088 |
| 1422717_at   | Acp1          | acid phosphatase 1, soluble                                                                    | AW554436  | 8.2410  | 6.9332  | 1.3078 |
| 1459593_x_at | Ppp1r13l      | protein phosphatase 1, regulatory (inhibitor)<br>subunit 13 like                               | BB752796  | 8.8012  | 7.4935  | 1.3077 |
| 1444811_at   | Sec62         | SEC62 homolog (S. cerevisiae)                                                                  | BM293801  | 5.7781  | 4.4709  | 1.3071 |
| 1430983_at   | Pdia6         | protein disulfide isomerase associated 6                                                       | AK005989  | 6.0777  | 4.7725  | 1.3052 |
| 1436380_at   | Cdc42bpa      | CDC42 binding protein kinase alpha                                                             | BG518726  | 7.6064  | 6.3012  | 1.3052 |
| 1441017_at   | Zcchc14       | zinc finger, CCHC domain containing 14                                                         | BB336452  | 7.8900  | 6.5849  | 1.3051 |
| 1428283_at   | Cyp2s1        | cytochrome P450, family 2, subfamily s,<br>polypeptide 1                                       | AK004699  | 5.6096  | 4.3048  | 1.3049 |
| 1456577_x_at | Pitrm1        | pitrilysin metallopeptidase 1                                                                  | AV304625  | 8.2802  | 6.9758  | 1.3043 |
| 1440751_at   | Ep400         | E1A binding protein p400                                                                       | AI429212  | 6.7136  | 5.4093  | 1.3042 |
| 1433844_a_at | Dusp9         | dual specificity phosphatase 9                                                                 | AV295798  | 6.4012  | 5.0970  | 1.3042 |
| 1429071_at   | Me3           | malic enzyme 3, NADP(+)-dependent,<br>mitochondrial                                            | AK006146  | 6.2392  | 4.9350  | 1.3042 |
| 1426065_a_at | Trib3         | tribbles homolog 3 (Drosophila)                                                                | BC012955  | 8.6118  | 7.3079  | 1.3039 |
| 1429345_at   | Tubgcp4       | tubulin, gamma complex associated protein 4                                                    | AK016563  | 7.4224  | 6.1198  | 1.3026 |
| 1436914_at   | Ctdspl2       | CTD (carboxy-terminal domain, RNA<br>polymerase II, polypeptide A) small<br>phosphatase like 2 | BB524458  | 8.5761  | 7.2741  | 1.3020 |
| 1453182_a_at | Smpd4         | sphingomyelin phosphodiesterase 4                                                              | BB220041  | 8.4117  | 7.1110  | 1.3006 |
| 1419281_a_at | Zfp259        | zinc finger protein 259                                                                        | BC021397  | 9.6339  | 8.3333  | 1.3005 |
| 1452610_at   | Zkscan14      | zinc finger with KRAB and SCAN domains 14                                                      | AK009842  | 6.1811  | 4.8806  | 1.3005 |
| 1433781_a_at | Cldn12        | claudin 12                                                                                     | AW554231  | 10.8354 | 9.5350  | 1.3004 |
| 1433843_at   | Hs1bp3        | HCLS1 binding protein 3                                                                        | AW541327  | 7.9936  | 6.6941  | 1.2996 |
| 1438437_a_at | 4933439C10Rik | RIKEN cDNA 4933439C10 gene                                                                     | AV205521  | 7.9936  | 6.6941  | 1.2996 |
| 1426034_a_at | Runx2         | runt related transcription factor 2                                                            | AF005936  | 5.9122  | 4.6127  | 1.2995 |
| 1417434_at   | Gpd2          | glycerol phosphate dehydrogenase 2,<br>mitochondrial                                           | NM_010274 | 11.0863 | 9.7874  | 1.2989 |
| 1416924_at   | Bri3          | brain protein I3                                                                               | NM_018772 | 10.9168 | 9.6182  | 1.2986 |
| 1429082_at   | Ankle2        | ankyrin repeat and LEM domain containing 2                                                     | BM227962  | 8.6578  | 7.3594  | 1.2984 |

|              |               |                                                                    |           |         |         |        |
|--------------|---------------|--------------------------------------------------------------------|-----------|---------|---------|--------|
| 1454920_at   | Uhrf2         | ubiquitin-like, containing PHD and RING finger domains 2           | BQ266387  | 8.8698  | 7.5722  | 1.2976 |
| 1428729_at   | Krit1         | KRIT1, ankyrin repeat containing                                   | BI793814  | 7.0755  | 5.7781  | 1.2974 |
| 1444387_at   | Nmt2          | N-myristoyltransferase 2                                           | BB409982  | 7.2562  | 5.9590  | 1.2972 |
| 1434469_at   | Otud4         | OTU domain containing 4                                            | BM238914  | 8.2615  | 6.9643  | 1.2971 |
| 1441461_at   |               |                                                                    | AV323439  | 6.1198  | 4.8229  | 1.2969 |
| 1441089_at   | Eif2c3        | eukaryotic translation initiation factor 2C, 3                     | BB205493  | 6.3069  | 5.0107  | 1.2962 |
| 1424149_at   | Nsmce2        | non-SMC element 2 homolog (MMS21, S. cerevisiae)                   | BC009125  | 10.5834 | 9.2874  | 1.2960 |
| 1429921_at   | 9530068E07Rik | RIKEN cDNA 9530068E07 gene                                         | AK012310  | 5.4819  | 4.1867  | 1.2952 |
| 1422583_at   | Rab3b         | RAB3B, member RAS oncogene family                                  | NM_023537 | 7.4657  | 6.1715  | 1.2943 |
| 1432538_a_at | Rfc3          | replication factor C (activator 1) 3                               | AK013095  | 9.9072  | 8.6133  | 1.2939 |
| 1429215_at   | 2310058N22Rik | RIKEN cDNA 2310058N22 gene                                         | BQ175646  | 6.3902  | 5.0970  | 1.2932 |
| 1426436_at   | Tmem159       | transmembrane protein 159                                          | BG066131  | 6.3029  | 5.0107  | 1.2922 |
| 1423470_at   | Ptbp2         | polypyrimidine tract binding protein 2                             | BB076855  | 10.5329 | 9.2413  | 1.2916 |
| 1416756_at   | Dnajb1        | DnaJ (Hsp40) homolog, subfamily B, member 1                        | AK002290  | 10.5172 | 9.2257  | 1.2915 |
| 1438249_at   | Usp7          | ubiquitin specific peptidase 7                                     | BM247366  | 7.9993  | 6.7079  | 1.2914 |
| 1446807_at   | Usp8          | ubiquitin specific peptidase 8                                     | BB215201  | 6.3376  | 5.0468  | 1.2908 |
| 1417148_at   | Pdgfrb        | platelet derived growth factor receptor, beta polypeptide          | NM_008809 | 6.6318  | 5.3414  | 1.2904 |
| 1421610_at   | Cx3cl1        | chemokine (C-X3-C motif) ligand 1                                  | NM_021373 | 5.3765  | 4.0861  | 1.2904 |
| 1452342_at   | Apbb2         | amyloid beta (A4) precursor protein-binding, family B, member 2    | AW542721  | 9.4253  | 8.1357  | 1.2896 |
| 1459885_s_at | Cox7c         | cytochrome c oxidase, subunit VIIc                                 | AA190297  | 7.7740  | 6.4845  | 1.2895 |
| 1437791_s_at | Emi5          | echinoderm microtubule associated protein like 5                   | AV230748  | 7.0139  | 5.7245  | 1.2894 |
| 1419449_a_at | Gnai2         | guanine nucleotide binding protein (G protein), alpha inhibiting 2 | NM_008138 | 11.1363 | 9.8469  | 1.2894 |
| 1422716_a_at | Acp1          | acid phosphatase 1, soluble                                        | AW554436  | 9.0631  | 7.7740  | 1.2891 |
| 1421383_at   | Ccdc82        | coiled-coil domain containing 82                                   | NM_025534 | 5.9564  | 4.6674  | 1.2890 |
| 1441926_x_at | Tmie          | transmembrane inner ear                                            | BB326566  | 5.7245  | 4.4357  | 1.2888 |
| 1438633_x_at | Lasp1         | LIM and SH3 protein 1                                              | BB377636  | 10.9308 | 9.6430  | 1.2878 |
| 1430047_at   | Ankrd32       | ankyrin repeat domain 32                                           | AK012253  | 6.7048  | 5.4174  | 1.2874 |
| 1449901_a_at | Map3k6        | mitogen-activated protein kinase kinase kinase 6                   | NM_016693 | 7.3768  | 6.0895  | 1.2873 |
| 1437399_at   | Cldn25        | claudin 25                                                         | BE627927  | 5.8297  | 4.5427  | 1.2870 |
| 1460257_a_at |               |                                                                    | NM_026829 | 8.5618  | 7.2750  | 1.2868 |
| 1430043_at   | Ttc19         | tetratricopeptide repeat domain 19                                 | BE979150  | 7.7278  | 6.4415  | 1.2863 |
| 1442878_at   | Prdx6         | peroxiredoxin 6                                                    | AW319648  | 6.6275  | 5.3414  | 1.2861 |
| 1444272_at   | Intu          | inturned planar cell polarity effector homolog (Drosophila)        | BB207089  | 6.8973  | 5.6112  | 1.2861 |
| 1448760_at   | Zfp68         | zinc finger protein 68                                             | NM_013844 | 9.1920  | 7.9068  | 1.2852 |
| 1430197_a_at | Pitpnm2       | phosphatidylinositol transfer protein, membrane-associated 2       | AK015126  | 6.1504  | 4.8655  | 1.2849 |
| 1426689_s_at | Sdha          | succinate dehydrogenase complex, subunit A, flavoprotein (Fp)      | BF585357  | 10.6111 | 9.3264  | 1.2847 |
| 1443196_at   |               |                                                                    | BB473548  | 7.0359  | 5.7515  | 1.2844 |
| 1430152_at   | Eps15         | epidermal growth factor receptor pathway substrate 15              | BB207193  | 5.3212  | 4.0372  | 1.2840 |
| 1429949_at   | 6530415H11Rik | RIKEN cDNA 6530415H11 gene                                         | AK018340  | 6.7353  | 5.4520  | 1.2832 |
| 1431314_a_at |               |                                                                    | AK017936  | 7.1464  | 5.8632  | 1.2832 |
| 1448352_at   | Luzp1         | leucine zipper protein 1                                           | BB705823  | 8.9265  | 7.6436  | 1.2829 |
| 1459627_at   | Sc4mol        | sterol-C4-methyl oxidase-like                                      | BG070057  | 6.6838  | 5.4014  | 1.2824 |
| 1415899_at   | Junb          | Jun-B oncogene                                                     | NM_008416 | 9.4008  | 8.1187  | 1.2821 |
| 1456401_at   | Cacnb2        | calcium channel, voltage-dependent, beta 2 subunit                 | BB078175  | 5.5153  | 4.2333  | 1.2820 |
| 1444710_at   | Gm19589       | predicted gene, 19589                                              | BB818892  | 5.3054  | 4.0235  | 1.2819 |
| 1424753_at   | Nudt14        | nudix (nucleoside diphosphate linked moiety X)-type motif 14       | BC025444  | 9.4555  | 8.1743  | 1.2812 |
| 1456195_x_at | Itgb5         | integrin beta 5                                                    | BB543979  | 9.6748  | 8.3946  | 1.2802 |
| 1422715_s_at | Acp1          | acid phosphatase 1, soluble                                        | AW554436  | 11.9243 | 10.6444 | 1.2799 |
| 1419649_s_at | Myo1c         | myosin IC                                                          | NM_008659 | 11.3699 | 10.0901 | 1.2798 |
| 1450646_at   | Cyp51         | cytochrome P450, family 51                                         | NM_020010 | 11.0142 | 9.7351  | 1.2791 |
| 1422286_a_at | Tgif1         | TGFB-induced factor homeobox 1                                     | NM_009372 | 9.2349  | 7.9573  | 1.2776 |
| 1429720_at   | Naa35         | N(alpha)-acetyltransferase 35, NatC auxiliary subunit              | AK021042  | 9.5089  | 8.2314  | 1.2774 |

|              |               |                                                                                                |           |         |         |        |
|--------------|---------------|------------------------------------------------------------------------------------------------|-----------|---------|---------|--------|
| 1433439_at   |               |                                                                                                | BG071103  | 10.1660 | 8.8887  | 1.2773 |
| 1443504_at   | E330022O07    | uncharacterized protein E330022O07                                                             | BB107293  | 5.7682  | 4.4917  | 1.2765 |
| 1453639_s_at | Ccdc163       | coiled-coil domain containing 163                                                              | AK016995  | 6.0989  | 4.8229  | 1.2760 |
| 1429423_at   | 4930518I15Rik | RIKEN cDNA 4930518I15 gene                                                                     | BB484739  | 5.5812  | 4.3056  | 1.2756 |
| 1453804_a_at | Orc4          | origin recognition complex, subunit 4                                                          | AK011550  | 10.3760 | 9.1012  | 1.2748 |
| 1420965_a_at | Enc1          | ectodermal-neural cortex 1                                                                     | BM120053  | 10.2943 | 9.0198  | 1.2745 |
| 1435331_at   | Pyhin1        | pyrin and HIN domain family, member 1                                                          | BM241008  | 5.0970  | 3.8228  | 1.2742 |
| 1427685_a_at | Synj2         | synaptojanin 2                                                                                 | AF041858  | 7.4308  | 6.1573  | 1.2735 |
| 1428282_at   | Tbce          | tubulin-specific chaperone E                                                                   | AK011899  | 8.9065  | 7.6333  | 1.2732 |
| 1453012_at   | Tsc22d2       | TSC22 domain family, member 2                                                                  | AK017449  | 5.8297  | 4.5566  | 1.2731 |
| 1422023_at   | Bsn           | bassoon                                                                                        | AV139249  | 5.3765  | 4.1035  | 1.2731 |
| 1423434_at   | Tead1         | TEA domain family member 1                                                                     | BB546942  | 5.9357  | 4.6629  | 1.2728 |
| 1415800_at   | Gja1          | gap junction protein, alpha 1                                                                  | M63801    | 10.9505 | 9.6781  | 1.2724 |
| 1440455_at   | Camk2n1       | calcium/calmodulin-dependent protein kinase II inhibitor 1                                     | AI848599  | 6.2831  | 5.0107  | 1.2724 |
| 1441577_at   | C530014P21Rik | RIKEN cDNA C530014P21 gene                                                                     | BB419140  | 5.3750  | 4.1035  | 1.2716 |
| 1428323_at   | Gpd2          | glycerol phosphate dehydrogenase 2, mitochondrial                                              | BQ175968  | 10.2906 | 9.0192  | 1.2713 |
| 1443846_x_at |               |                                                                                                | BB402666  | 6.1904  | 4.9195  | 1.2709 |
| 1449144_at   | Gna11         | guanine nucleotide binding protein, alpha 11                                                   | NM_010301 | 10.1428 | 8.8720  | 1.2708 |
| 1457339_at   |               |                                                                                                | BG093955  | 5.1047  | 3.8342  | 1.2705 |
| 1448829_at   | Smc6          | structural maintenance of chromosomes 6                                                        | AV281575  | 9.1666  | 7.8961  | 1.2705 |
| 1418954_at   | Camkk1        | calcium/calmodulin-dependent protein kinase kinase 1, alpha                                    | NM_018883 | 7.1076  | 5.8382  | 1.2694 |
| 1422211_a_at | B3gnt3        | UDP-GlcNAc:betaGal beta-1,3-N-acetylglucosaminyltransferase 3                                  | AY037785  | 5.6689  | 4.3997  | 1.2692 |
| 1439465_x_at | Agb15         | ATP/GTP binding protein-like 5                                                                 | AV277339  | 8.0327  | 6.7636  | 1.2691 |
| 1448601_s_at | Msx1          | homeobox, msh-like 1                                                                           | BC016426  | 7.1072  | 5.8382  | 1.2691 |
| 1443536_at   | Slc7a11       | solute carrier family 7 (cationic amino acid transporter, y+ system), member 11                | BB453858  | 6.4992  | 5.2306  | 1.2686 |
| 1441617_at   | Med15         | mediator complex subunit 15                                                                    | BB475089  | 5.8809  | 4.6127  | 1.2682 |
| 1418002_at   | Higd2a        | HIG1 domain family, member 2A                                                                  | NM_025933 | 11.7151 | 10.4473 | 1.2678 |
| 1424720_at   | Mgat4b        | mannoside acetylglucosaminyltransferase 4, isoenzyme B                                         | BC026638  | 10.9841 | 9.7169  | 1.2672 |
| 1416075_at   | Sav1          | salvador homolog 1 (Drosophila)                                                                | NM_022028 | 8.9005  | 7.6333  | 1.2672 |
| 1439071_at   | 5430416N02Rik | RIKEN cDNA 5430416N02 gene                                                                     | AW112059  | 9.1237  | 7.8569  | 1.2668 |
| 1453622_s_at | Mllt3         | myeloid/lymphoid or mixed-lineage leukemia (trithorax homolog, Drosophila); translocated to, 3 | AK008707  | 9.1047  | 7.8384  | 1.2663 |
| 1439514_at   | A930004D18Rik | RIKEN cDNA A930004D18 gene                                                                     | BB277834  | 5.8789  | 4.6127  | 1.2662 |
| 1417237_at   | Pld2          | phospholipase D2                                                                               | NM_008876 | 8.2299  | 6.9643  | 1.2656 |
| 1431665_a_at | Timm8b        | translocase of inner mitochondrial membrane 8 homolog b (yeast)                                | AK004190  | 10.7617 | 9.4962  | 1.2654 |
| 1423172_at   | Napb          | N-ethylmaleimide sensitive fusion protein attachment protein beta                              | BB147418  | 6.3197  | 5.0544  | 1.2652 |
| 1417005_at   | Klc1          | kinesin light chain 1                                                                          | AU079968  | 8.4238  | 7.1586  | 1.2652 |
| 1427574_s_at | Sh3d19        | SH3 domain protein D19                                                                         | BF232848  | 5.2353  | 3.9701  | 1.2652 |
| 1429233_at   | 11-Sep        | septin 11                                                                                      | BM120495  | 9.1870  | 7.9234  | 1.2637 |
| 1417014_at   | Hspb8         | heat shock protein 8                                                                           | AF250139  | 7.9326  | 6.6707  | 1.2620 |
| 1418664_at   | Mpdz          | multiple PDZ domain protein                                                                    | AK019164  | 8.8994  | 7.6378  | 1.2616 |
| 1459301_at   |               |                                                                                                | AW546127  | 5.8181  | 4.5566  | 1.2615 |
| 1419549_at   | Arg1          | arginase, liver                                                                                | NM_007482 | 5.2306  | 3.9701  | 1.2605 |
| 1439530_a_at | Ppp1r13l      | protein phosphatase 1, regulatory (inhibitor) subunit 13 like                                  | BB826954  | 8.9127  | 7.6525  | 1.2602 |
| 1435787_at   | Ppm1l         | protein phosphatase 1 (formerly 2C)-like                                                       | BB035578  | 8.2662  | 7.0061  | 1.2601 |
| 1450264_a_at | Chka          | choline kinase alpha                                                                           | NM_013490 | 8.1930  | 6.9332  | 1.2598 |
| 1438945_x_at | Gja1          | gap junction protein, alpha 1                                                                  | BB142324  | 10.1781 | 8.9185  | 1.2596 |
| 1451832_at   | Cklf          | chemokine-like factor                                                                          | AF401530  | 6.4242  | 5.1653  | 1.2589 |
| 1448777_at   | Mcm2          | minichromosome maintenance deficient 2 mitotin (S. cerevisiae)                                 | NM_008564 | 10.5120 | 9.2531  | 1.2588 |
| 1436854_at   | Trpc2         | transient receptor potential cation channel, subfamily C, member 2                             | AV284133  | 6.3554  | 5.0970  | 1.2584 |
| 1419506_at   | Gggs1         | geranylgeranyl diphosphate synthase 1                                                          | NM_010282 | 8.9155  | 7.6573  | 1.2582 |
| 1429501_s_at | Ppm1a         | protein phosphatase 1A, magnesium dependent, alpha isoform                                     | C85630    | 7.8151  | 6.5578  | 1.2573 |

|              |               |                                                                                                |           |         |         |        |
|--------------|---------------|------------------------------------------------------------------------------------------------|-----------|---------|---------|--------|
| 1423175_s_at | Pard6b        | par-6 (partitioning defective 6) homolog beta (C. elegans)                                     | BE953582  | 5.8652  | 4.6081  | 1.2570 |
| 1437410_at   | Aldh2         | aldehyde dehydrogenase 2, mitochondrial                                                        | BB513627  | 6.8852  | 5.6283  | 1.2569 |
| 1423812_s_at | Vopp1         | vesicular, overexpressed in cancer, prosurvival protein 1                                      | BC024822  | 9.2665  | 8.0105  | 1.2560 |
| 1418943_at   | B230120H23Rik | RIKEN cDNA B230120H23 gene                                                                     | NM_023057 | 6.0779  | 4.8229  | 1.2550 |
| 1438660_at   | Gcnt2         | glucosaminyl (N-acetyl) transferase 2, l-branching enzyme                                      | BM239196  | 7.3026  | 6.0489  | 1.2537 |
| 1457019_s_at | Rdh14         | retinol dehydrogenase 14 (all-trans and 9-cis)                                                 | BB241474  | 5.7781  | 4.5250  | 1.2531 |
| 1430604_a_at | Dab2          | disabled 2, mitogen-responsive phosphoprotein                                                  | AW986632  | 5.2228  | 3.9701  | 1.2527 |
| 1442849_at   | Lrp1          | low density lipoprotein receptor-related protein 1                                             | AV345706  | 5.3054  | 4.0531  | 1.2523 |
| 1435188_at   | Gm129         | predicted gene 129                                                                             | BB407125  | 7.1463  | 5.8941  | 1.2522 |
| 1456904_at   |               |                                                                                                | BQ101405  | 7.1687  | 5.9178  | 1.2509 |
| 1452321_at   | Brwd1         | bromodomain and WD repeat domain containing 1                                                  | BM230348  | 6.9850  | 5.7345  | 1.2505 |
| 1423212_at   | Phc1          | polyhomeotic-like 1 (Drosophila)                                                               | BE650359  | 9.0583  | 7.8087  | 1.2496 |
| 1438301_at   |               |                                                                                                | BG064109  | 6.4791  | 5.2306  | 1.2485 |
| 1432006_at   | Ap2a2         | adaptor protein complex AP-2, alpha 2 subunit                                                  | AK009735  | 6.9269  | 5.6789  | 1.2480 |
| 1435266_at   | Scai          | suppressor of cancer cell invasion                                                             | BB495464  | 8.1320  | 6.8852  | 1.2468 |
| 1435320_at   | Ctdspl2       | CTD (carboxy-terminal domain, RNA polymerase II, polypeptide A) small phosphatase like 2       | BG070878  | 9.1366  | 7.8900  | 1.2466 |
| 1420119_s_at | Phf3          | PHD finger protein 3                                                                           | AU020177  | 8.5845  | 7.3384  | 1.2461 |
| 1448688_at   | Podxl         | podocalyxin-like                                                                               | AF290209  | 9.1254  | 7.8798  | 1.2456 |
| 1437074_at   | Snx5          | sorting nexin 5                                                                                | BG067008  | 6.8057  | 5.5602  | 1.2455 |
| 1452014_a_at | Igf1          | insulin-like growth factor 1                                                                   | AF440694  | 6.3701  | 5.1247  | 1.2454 |
| 1436714_at   | Lpp           | LIM domain containing preferred translocation partner in lipoma                                | BB297498  | 9.3732  | 8.1284  | 1.2449 |
| 1452071_at   | Slc4a4        | solute carrier family 4 (anion exchanger), member 4                                            | BE655147  | 5.7996  | 4.5566  | 1.2431 |
| 1424996_at   | Cflar         | CASP8 and FADD-like apoptosis regulator                                                        | BC023121  | 9.1730  | 7.9300  | 1.2430 |
| 1440999_at   | Zfp697        | zinc finger protein 697                                                                        | BB560193  | 6.5578  | 5.3151  | 1.2427 |
| 1420727_a_at | Tmlhe         | trimethyllysine hydroxylase, epsilon                                                           | AY033513  | 8.0688  | 6.8261  | 1.2427 |
| 1458665_at   | Clic1         | chloride intracellular channel 1                                                               | AA172714  | 7.2244  | 5.9820  | 1.2424 |
| 1427413_a_at | Celf1         | CUGBP, Elav-like family member 1                                                               | AK014492  | 10.3161 | 9.0738  | 1.2423 |
| 1429527_a_at | Plscr1        | phospholipid scramblase 1                                                                      | BF319989  | 9.8540  | 8.6118  | 1.2422 |
| 1448328_at   | Sh3bp2        | SH3-domain binding protein 2                                                                   | BC010198  | 7.8634  | 6.6215  | 1.2419 |
| 1431334_a_at | 4933433P14Rik | RIKEN cDNA 4933433P14 gene                                                                     | AK017049  | 7.3506  | 6.1095  | 1.2411 |
| 1443323_at   | Trmt13        | tRNA methyltransferase 13 homolog (S. cerevisiae)                                              | BB051808  | 5.9162  | 4.6753  | 1.2409 |
| 1444364_at   | Rcor3         | REST corepressor 3                                                                             | BB127325  | 5.5405  | 4.2996  | 1.2408 |
| 1440076_at   |               |                                                                                                | BM237736  | 8.7343  | 7.4935  | 1.2408 |
| 1456136_at   | Kifc5b        | kinesin family member C5B                                                                      | BG067065  | 6.3376  | 5.0970  | 1.2407 |
| 1418067_at   | Cfl2          | cofilin 2, muscle                                                                              | AI323758  | 11.8420 | 10.6017 | 1.2404 |
| 1417471_s_at | D1Ert622e     | DNA segment, Chr 1, ERATO Doi 622, expressed                                                   | NM_133825 | 8.2785  | 7.0381  | 1.2404 |
| 1438488_at   | Esd           | esterase D/formylglutathione hydrolase                                                         | BB448921  | 5.2104  | 3.9701  | 1.2403 |
| 1430077_at   | Srsf11        | serine/arginine-rich splicing factor 11                                                        | AK002411  | 7.6064  | 6.3662  | 1.2402 |
| 1416588_at   | Ptpn          | protein tyrosine phosphatase, receptor type, N                                                 | NM_008985 | 7.3391  | 6.0989  | 1.2402 |
| 1431330_at   | 3110002H16Rik | RIKEN cDNA 3110002H16 gene                                                                     | AK010309  | 5.6970  | 4.4570  | 1.2400 |
| 1426519_at   | P4ha1         | procollagen-proline, 2-oxoglutarate 4-dioxygenase (proline 4-hydroxylase), alpha 1 polypeptide | AI314028  | 8.0108  | 6.7709  | 1.2399 |
| 1416901_at   | Npc2          | Niemann Pick type C2                                                                           | BC007190  | 12.4760 | 11.2361 | 1.2398 |
| 1425533_a_at | Stau2         | staufen (RNA binding protein) homolog 2 (Drosophila)                                           | AJ244015  | 7.0376  | 5.7980  | 1.2397 |
| 1449590_a_at | Mras          | muscle and microspikes RAS                                                                     | AB004879  | 7.4140  | 6.1744  | 1.2396 |
| 1425358_at   | Riok1         | RIO kinase 1 (yeast)                                                                           | BC006884  | 6.1220  | 4.8824  | 1.2395 |
| 1453105_at   | Zfp263        | zinc finger protein 263                                                                        | BG069835  | 8.1166  | 6.8770  | 1.2395 |
| 1435552_at   | Otud7b        | OTU domain containing 7B                                                                       | AV276474  | 9.8401  | 8.6007  | 1.2394 |
| 1439959_at   | Fgf11         | fibroblast growth factor 11                                                                    | AW488620  | 5.0260  | 3.7880  | 1.2380 |
| 1457252_x_at | Pld2          | phospholipase D2                                                                               | BB118582  | 9.1178  | 7.8798  | 1.2379 |
| 1445681_at   | Cdca7         | cell division cycle associated 7                                                               | BE852160  | 5.2080  | 3.9701  | 1.2379 |
| 1455897_x_at | Hmgn1         | high mobility group nucleosomal binding domain 1                                               | BF464696  | 12.7419 | 11.5043 | 1.2376 |
| 1453190_at   | Usp19         | ubiquitin specific peptidase 19                                                                | AK018431  | 5.6970  | 4.4597  | 1.2373 |

|              |               |                                                                  |           |         |         |        |
|--------------|---------------|------------------------------------------------------------------|-----------|---------|---------|--------|
| 1454015_a_at | Cdh13         | cadherin 13                                                      | AK016527  | 5.5336  | 4.2966  | 1.2370 |
| 1435548_at   | Mrs2          | MRS2 magnesium homeostasis factor homolog (S. cerevisiae)        | BB015377  | 7.8156  | 6.5790  | 1.2366 |
| 1441986_at   | Zcchc6        | zinc finger, CCHC domain containing 6                            | BG067943  | 7.0284  | 5.7919  | 1.2364 |
| 1450862_at   | Rad54l        | RAD54 like (S. cerevisiae)                                       | AV310220  | 9.4724  | 8.2362  | 1.2362 |
| 1445081_at   | Scai          | suppressor of cancer cell invasion                               | BB335888  | 5.4771  | 4.2412  | 1.2359 |
| 1457040_at   | Lgi2          | leucine-rich repeat LGI family, member 2                         | BE947711  | 5.2745  | 4.0390  | 1.2355 |
| 1440343_at   | Rps6ka5       | ribosomal protein S6 kinase, polypeptide 5                       | BQ174267  | 6.7960  | 5.5610  | 1.2351 |
| 1442213_at   | LOC552908     | uncharacterized LOC552908                                        | BB344065  | 6.3729  | 5.1378  | 1.2351 |
| 1423700_at   | Rfc3          | replication factor C (activator 1) 3                             | BC026795  | 9.9492  | 8.7150  | 1.2342 |
| 1436985_at   | Zfp644        | zinc finger protein 644                                          | BM115349  | 8.1974  | 6.9635  | 1.2339 |
| 1419803_s_at | Ccdc12        | coiled-coil domain containing 12                                 | C76605    | 10.1523 | 8.9185  | 1.2339 |
| 1426720_at   | Apbb2         | amyloid beta (A4) precursor protein-binding, family B, member 2  | BG067463  | 5.1383  | 3.9047  | 1.2336 |
| 1434627_at   | Nrf1          | nuclear respiratory factor 1                                     | BM221378  | 8.4736  | 7.2404  | 1.2332 |
| 1454558_at   | 5430416B10Rik | RIKEN cDNA 5430416B10 gene                                       | AK017313  | 5.1129  | 3.8802  | 1.2327 |
| 1421477_at   | Cplx2         | complexin 2                                                      | NM_009946 | 6.8729  | 5.6402  | 1.2327 |
| 1457813_at   |               |                                                                  | BB033054  | 6.0047  | 4.7725  | 1.2322 |
| 1425542_a_at | Ppp2r5c       | protein phosphatase 2, regulatory subunit B (B56), gamma isoform | BC003979  | 10.9903 | 9.7581  | 1.2322 |
| 1430335_a_at | Pax3          | paired box gene 3                                                | AK012493  | 7.7219  | 6.4898  | 1.2320 |
| 1417229_at   | Capn1         | calpain 1                                                        | AF084459  | 6.8429  | 5.6110  | 1.2319 |
| 1436069_at   | Ing5          | inhibitor of growth family, member 5                             | AW545952  | 9.5527  | 8.3212  | 1.2315 |
| 1435866_s_at | Hist3h2a      | histone cluster 3, H2a                                           | AV297651  | 7.7050  | 6.4737  | 1.2313 |
| 1420506_a_at | Stxbp1        | syntaxin binding protein 1                                       | AF326545  | 6.6421  | 5.4108  | 1.2312 |
| 1426270_at   | Smc5          | structural maintenance of chromosomes 5                          | AV257384  | 8.7622  | 7.5324  | 1.2299 |
| 1419767_at   | Padi3         | peptidyl arginine deiminase, type III                            | NM_011060 | 6.3922  | 5.1653  | 1.2269 |
| 1440641_at   | Vps29         | vacuolar protein sorting 29 (S. pombe)                           | BB278998  | 6.4952  | 5.2685  | 1.2267 |
| 1458176_at   | Per3          | period homolog 3 (Drosophila)                                    | BB021263  | 6.7217  | 5.4953  | 1.2264 |
| 1452418_at   |               |                                                                  | BF719154  | 8.6118  | 7.3855  | 1.2263 |
| 1452042_a_at | Tmem144       | transmembrane protein 144                                        | AV306255  | 6.0489  | 4.8229  | 1.2260 |
| 1450993_at   | Pask          | PAS domain containing serine/threonine kinase                    | BB729869  | 7.8678  | 6.6421  | 1.2258 |
| 1424552_at   | Casp8         | caspase 8                                                        | BC006737  | 9.9892  | 8.7645  | 1.2248 |
| 1436890_at   | Uap1l1        | UDP-N-acetylglucosamine pyrophosphorylase 1-like 1               | BG963358  | 10.3579 | 9.1340  | 1.2239 |
| 1417602_at   | Per2          | period homolog 2 (Drosophila)                                    | AF035830  | 5.5953  | 4.3717  | 1.2237 |
| 1449542_at   | Pbx1          | pre B cell leukemia homeobox 1                                   | NM_008783 | 6.7532  | 5.5301  | 1.2231 |
| 1460555_at   | Fam65b        | family with sequence similarity 65, member B                     | BM242294  | 7.3417  | 6.1198  | 1.2219 |
| 1427363_at   |               |                                                                  | BC003304  | 6.8617  | 5.6402  | 1.2214 |
| 1431789_s_at | Tmed5         | transmembrane emp24 protein transport domain containing 5        | AK014065  | 9.4038  | 8.1843  | 1.2195 |
| 1455941_s_at | Map2k5        | mitogen-activated protein kinase kinase 5                        | BB025010  | 7.4774  | 6.2582  | 1.2192 |
| 1426538_a_at | Trp53         | transformation related protein 53                                | BB828014  | 8.4595  | 7.2404  | 1.2191 |
| 1433915_s_at | Epn2          | epsin 2                                                          | BG794880  | 9.2402  | 8.0217  | 1.2185 |
| 1434334_at   | Prkd2         | protein kinase D2                                                | AW557946  | 7.5015  | 6.2831  | 1.2184 |
| 1423947_at   | 1110008P14Rik | RIKEN cDNA 1110008P14 gene                                       | BC024615  | 9.3072  | 8.0891  | 1.2180 |
| 1455355_at   | G2e3          | G2/M-phase specific E3 ubiquitin ligase                          | BG073146  | 8.1609  | 6.9434  | 1.2175 |
| 1450586_at   | Bdkrb1        | bradykinin receptor, beta 1                                      | NM_007539 | 5.1194  | 3.9024  | 1.2170 |
| 1456913_at   |               |                                                                  | BB476471  | 5.8297  | 4.6127  | 1.2170 |
| 1429593_at   | Slc38a2       | solute carrier family 38, member 2                               | BB030482  | 9.8607  | 8.6441  | 1.2166 |
| 1427457_a_at | Bmp1          | bone morphogenetic protein 1                                     | BG248060  | 6.5578  | 5.3414  | 1.2164 |
| 1444119_at   | Fam168a       | family with sequence similarity 168, member A                    | AW538756  | 6.8852  | 5.6689  | 1.2163 |
| 1442595_at   | Gm2115        | predicted gene 2115                                              | BE943953  | 5.6758  | 4.4597  | 1.2162 |
| 1436002_at   | Scube3        | signal peptide, CUB domain, EGF-like 3                           | BB484128  | 6.8564  | 5.6402  | 1.2162 |
| 1432007_s_at | Ap2a2         | adaptor protein complex AP-2, alpha 2 subunit                    | AK009735  | 8.1609  | 6.9450  | 1.2160 |
| 1435449_at   | Bcl2l11       | BCL2-like 11 (apoptosis facilitator)                             | BM120925  | 6.2508  | 5.0354  | 1.2154 |
| 1430075_at   | Sf3b3         | splicing factor 3b, subunit 3                                    | AK017529  | 8.7169  | 7.5015  | 1.2154 |
| 1417533_a_at | Itgb5         | integrin beta 5                                                  | NM_010580 | 10.3063 | 9.0915  | 1.2148 |
| 1436427_at   | Prpf4b        | PRP4 pre-mRNA processing factor 4 homolog B (yeast)              | BB344827  | 8.1371  | 6.9227  | 1.2144 |
| 1427226_at   | Epn2          | epsin 2                                                          | AF057286  | 9.1243  | 7.9120  | 1.2123 |
| 1453541_at   | Pfkl          | phosphofructokinase, liver, B-type                               | BM232561  | 6.5176  | 5.3054  | 1.2122 |
| 1426576_at   | Sgms1         | sphingomyelin synthase 1                                         | BE629162  | 7.5488  | 6.3376  | 1.2111 |
| 1440396_at   |               |                                                                  | BG075893  | 5.4443  | 4.2333  | 1.2110 |
| 1448513_a_at | Npc2          | Niemann Pick type C2                                             | BC007190  | 12.6294 | 11.4192 | 1.2102 |
| 1450449_a_at | Rilpl1        | Rab interacting lysosomal protein-like 1                         | NM_021430 | 8.8430  | 7.6333  | 1.2097 |

|              |               |                                                                         |           |         |         |        |
|--------------|---------------|-------------------------------------------------------------------------|-----------|---------|---------|--------|
| 1448757_at   | Pml           | promyelocytic leukemia                                                  | NM_008884 | 7.6374  | 6.4279  | 1.2095 |
| 1451601_a_at | Spns2         | spinster homolog 2                                                      | BC025823  | 5.1796  | 3.9701  | 1.2095 |
| 1425576_at   | Ahcyl1        | S-adenosylhomocysteine hydrolase-like 1                                 | BC018218  | 8.3946  | 7.1853  | 1.2094 |
| 1440341_at   |               |                                                                         | BB343093  | 5.7658  | 4.5566  | 1.2092 |
| 1458980_at   |               |                                                                         | BG064153  | 6.9332  | 5.7245  | 1.2087 |
| 1458497_at   |               |                                                                         | BM878504  | 6.2005  | 4.9925  | 1.2080 |
| 1437992_x_at | Gja1          | gap junction protein, alpha 1                                           | BB039269  | 11.3900 | 10.1831 | 1.2069 |
| 1448351_at   | Coro1b        | coronin, actin binding protein 1B                                       | NM_011778 | 9.5721  | 8.3652  | 1.2069 |
| 1453189_at   | Ube2i         | ubiquitin-conjugating enzyme E2I                                        | BM242612  | 8.0726  | 6.8662  | 1.2064 |
| 1440163_at   | Setd3         | SET domain containing 3                                                 | BB392503  | 6.7672  | 5.5610  | 1.2063 |
| 1451765_a_at | Entpd5        | ectonucleoside triphosphate diphosphohydrolase 5                        | AF136571  | 6.6165  | 5.4108  | 1.2057 |
| 1452940_x_at | Pitpnc1       | phosphatidylinositol transfer protein, cytoplasmic 1                    | AI595920  | 6.7353  | 5.5301  | 1.2052 |
| 1428859_at   | Paox          | polyamine oxidase (exo-N4-amino)                                        | AK010469  | 8.2552  | 7.0503  | 1.2049 |
| 1434079_s_at | Mcm2          | minichromosome maintenance deficient 2 mitotin ( <i>S. cerevisiae</i> ) | BB699415  | 11.3694 | 10.1647 | 1.2047 |
| 1416529_at   | Emp1          | epithelial membrane protein 1                                           | U25633    | 12.3567 | 11.1524 | 1.2043 |
| 1451122_at   |               |                                                                         | BC004801  | 11.3481 | 10.1453 | 1.2028 |
| 1430692_a_at | Sel1l         | sel-1 suppressor of lin-12-like ( <i>C. elegans</i> )                   | AK005023  | 7.2935  | 6.0907  | 1.2028 |
| 1459890_s_at | 1110008P14Rik | RIKEN cDNA 1110008P14 gene                                              | C79326    | 9.2189  | 8.0161  | 1.2028 |
| 1421997_s_at | Itga3         | integrin alpha 3                                                        | NM_013565 | 7.0658  | 5.8632  | 1.2027 |
| 1426404_a_at | Rnf11         | ring finger protein 11                                                  | BI150320  | 9.8136  | 8.6118  | 1.2018 |
| 1416120_at   | Rrm2          | ribonucleotide reductase M2                                             | NM_009104 | 10.3124 | 9.1108  | 1.2016 |
| 1438076_at   | Rpl30         | ribosomal protein L30                                                   | BB283415  | 8.2474  | 7.0462  | 1.2012 |
| 1453988_a_at | Ide           | insulin degrading enzyme                                                | AK014703  | 6.5424  | 5.3414  | 1.2010 |
| 1423013_at   | Foxf1         | forkhead box F1                                                         | NM_010426 | 7.1829  | 5.9820  | 1.2008 |
| 1420383_a_at | Col4a3bp      | collagen, type IV, alpha 3 (Goodpasture antigen) binding protein        | BC016197  | 7.2497  | 6.0489  | 1.2008 |
| 1447537_at   | 1500032P08Rik | RIKEN cDNA 1500032P08 gene                                              | AV032095  | 7.8510  | 6.6504  | 1.2005 |
| 1435807_at   | Cdc42         | cell division cycle 42                                                  | BF467211  | 7.5012  | 6.3015  | 1.1997 |
| 1453263_at   | Naa35         | N(alpha)-acetyltransferase 35, NatC auxiliary subunit                   | AK021042  | 8.4389  | 7.2404  | 1.1985 |
| 1437491_at   | Bicd2         | bicaudal D homolog 2 ( <i>Drosophila</i> )                              | BI793514  | 5.5422  | 4.3445  | 1.1977 |
| 1415956_a_at | Cdk16         | cyclin-dependent kinase 16                                              | NM_011049 | 8.6905  | 7.4935  | 1.1970 |
| 1435762_at   | Pacs1         | phosphofurin acidic cluster sorting protein 1                           | BM115617  | 7.7948  | 6.5981  | 1.1967 |
| 1459659_at   | LOC100040377  | uncharacterized LOC100040377                                            | BB833349  | 6.9094  | 5.7127  | 1.1967 |
| 1437946_x_at | Rapgef3       | Rap guanine nucleotide exchange factor (GEF) 3                          | BB506495  | 8.1353  | 6.9387  | 1.1966 |
| 1450622_at   | Bcar1         | breast cancer anti-estrogen resistance 1                                | NM_009954 | 8.3244  | 7.1280  | 1.1964 |
| 1456735_x_at | Acpl2         | acid phosphatase-like 2                                                 | BB458645  | 9.4253  | 8.2290  | 1.1963 |
| 1429510_at   | 2810410L24Rik | RIKEN cDNA 2810410L24 gene                                              | AK013071  | 6.3981  | 5.2025  | 1.1956 |
| 1453822_at   | Dnalc1        | dynein, axonemal, light chain 1                                         | BG916281  | 5.4916  | 4.2966  | 1.1950 |
| 1457001_at   | Cenpk         | centromere protein K                                                    | BF018652  | 5.7515  | 4.5566  | 1.1950 |
| 1422169_a_at | Bdnf          | brain derived neurotrophic factor                                       | AY057913  | 8.0386  | 6.8439  | 1.1947 |
| 1454657_s_at | Naa35         | N(alpha)-acetyltransferase 35, NatC auxiliary subunit                   | BG083730  | 10.1057 | 8.9112  | 1.1946 |
| 1422662_at   | Lgals8        | lectin, galactose binding, soluble 8                                    | AI987967  | 9.4619  | 8.2677  | 1.1942 |
| 1438473_at   | Arl15         | ADP-ribosylation factor-like 15                                         | BB445175  | 6.8628  | 5.6689  | 1.1939 |
| 1436976_a_at | Yod1          | YOD1 OTU deubiquitinating enzyme 1 homologue ( <i>S. cerevisiae</i> )   | BB201861  | 7.2842  | 6.0907  | 1.1935 |
| 1451310_a_at | Ctsl          | cathepsin L                                                             | J02583    | 13.0532 | 11.8598 | 1.1934 |
| 1427962_at   | Ccdc102a      | coiled-coil domain containing 102A                                      | BG072723  | 8.6942  | 7.5016  | 1.1926 |
| 1431355_s_at | Trpm7         | transient receptor potential cation channel, subfamily M, member 7      | BF783360  | 6.9699  | 5.7781  | 1.1918 |
| 1456169_at   | Tstd1         | thiosulfate sulfurtransferase (rhodanese)-like domain containing 1      | AW111083  | 5.0970  | 3.9053  | 1.1916 |
| 1429963_at   | Mapk6         | mitogen-activated protein kinase 6                                      | AK011505  | 7.4584  | 6.2670  | 1.1914 |
| 1420813_at   | Hdac7         | histone deacetylase 7                                                   | BB277517  | 8.6542  | 7.4635  | 1.1907 |
| 1425640_at   | Aff1          | AF4/FMR2 family, member 1                                               | BB586268  | 6.4211  | 5.2306  | 1.1905 |
| 1443490_at   | D3Erttd34e    | DNA segment, Chr 3, ERATO Doi 34, expressed                             | C77371    | 7.1586  | 5.9682  | 1.1904 |
| 1433943_at   | Itrip1        | inositol 1,4,5-triphosphate receptor interacting protein                | BM207348  | 7.2847  | 6.0945  | 1.1902 |
| 1450199_a_at | Stab1         | stabilin 1                                                              | NM_138672 | 6.3554  | 5.1653  | 1.1901 |
| 1460196_at   | Cbr1          | carbonyl reductase 1                                                    | NM_007620 | 8.3946  | 7.2050  | 1.1897 |

|              |               |                                                                                                |           |         |        |        |
|--------------|---------------|------------------------------------------------------------------------------------------------|-----------|---------|--------|--------|
| 1454757_s_at | Ifi2711       | interferon, alpha-inducible protein 27 like 1                                                  | AW554405  | 10.9983 | 9.8088 | 1.1895 |
| 1428827_at   | Whsc1         | Wolf-Hirschhorn syndrome candidate 1 (human)                                                   | AK017992  | 9.4646  | 8.2755 | 1.1891 |
| 1423627_at   | Nqo1          | NAD(P)H dehydrogenase, quinone 1                                                               | AV158882  | 8.6957  | 7.5068 | 1.1889 |
| 1458899_at   | Usp53         | ubiquitin specific peptidase 53                                                                | AV320152  | 5.5658  | 4.3770 | 1.1888 |
| 1455549_at   | Sestd1        | SEC14 and spectrin domains 1                                                                   | BB278422  | 9.2660  | 8.0779 | 1.1881 |
| 1429092_at   | Vkorc111      | vitamin K epoxide reductase complex, subunit 1-like 1                                          | AK009497  | 9.2712  | 8.0833 | 1.1879 |
| 1437576_at   | 2810427A07Rik | RIKEN cDNA 2810427A07 gene                                                                     | C76158    | 7.3026  | 6.1147 | 1.1879 |
| 1436459_at   |               |                                                                                                | BG073622  | 8.1851  | 6.9974 | 1.1877 |
| 1442047_at   | Rreb1         | ras responsive element binding protein 1                                                       | AW543242  | 6.4555  | 5.2685 | 1.1870 |
| 1455959_s_at | Gclc          | glutamate-cysteine ligase, catalytic subunit                                                   | AW825835  | 9.3485  | 8.1615 | 1.1869 |
| 1429294_at   | Trip13        | thyroid hormone receptor interactor 13                                                         | AK010336  | 9.5350  | 8.3482 | 1.1868 |
| 1451362_at   | Rab711        | RAB7, member RAS oncogene family-like 1                                                        | BC016133  | 7.1687  | 5.9820 | 1.1866 |
| 1455877_a_at | Nanos1        | nanos homolog 1 (Drosophila)                                                                   | BG075296  | 7.2436  | 6.0574 | 1.1862 |
| 1433147_at   | Cald1         | caldesmon 1                                                                                    | AK014755  | 7.3867  | 6.2005 | 1.1862 |
| 1452094_at   | P4ha1         | procollagen-proline, 2-oxoglutarate 4-dioxygenase (proline 4-hydroxylase), alpha 1 polypeptide | AI314028  | 10.7852 | 9.5992 | 1.1860 |
| 1433901_at   | Caprin1       | cell cycle associated protein 1                                                                | AV301998  | 10.9055 | 9.7203 | 1.1852 |
| 1428910_at   | 2310022B05Rik | RIKEN cDNA 2310022B05 gene                                                                     | BI328156  | 10.2355 | 9.0504 | 1.1851 |
| 1449839_at   | Casp3         | caspase 3                                                                                      | BG070529  | 10.5737 | 9.3892 | 1.1845 |
| 1423267_s_at | Itga5         | integrin alpha 5 (fibronectin receptor alpha)                                                  | BB493533  | 7.2774  | 6.0929 | 1.1845 |
| 1455658_at   | Cggbp1        | CGG triplet repeat binding protein 1                                                           | BI080272  | 9.8736  | 8.6892 | 1.1843 |
| 1416250_at   | Btg2          | B cell translocation gene 2, anti-proliferative                                                | NM_007570 | 9.0860  | 7.9021 | 1.1839 |
| 1422462_at   | Ube2t         | ubiquitin-conjugating enzyme E2T (putative)                                                    | NM_026024 | 9.7590  | 8.5757 | 1.1834 |
| 1428417_at   | Fam164a       | family with sequence similarity 164, member A                                                  | BE198251  | 8.6553  | 7.4725 | 1.1828 |
| 1424314_at   | Prpf3         | PRP3 pre-mRNA processing factor 3 homolog (yeast)                                              | BC006782  | 9.2341  | 8.0518 | 1.1823 |
| 1436421_s_at | Arpc5l        | actin related protein 2/3 complex, subunit 5-like                                              | BB403233  | 9.4462  | 8.2640 | 1.1821 |
| 1440091_at   | Meis2         | Meis homeobox 2                                                                                | BB212184  | 5.7948  | 4.6127 | 1.1821 |
| 1439840_at   | Polb          | polymerase (DNA directed), beta                                                                | BB208426  | 5.5405  | 4.3588 | 1.1817 |
| 1446150_at   |               |                                                                                                | BB373481  | 5.0544  | 3.8729 | 1.1815 |
| 1420641_a_at | Sqrdl         | sulfide quinone reductase-like (yeast)                                                         | AF174535  | 9.0549  | 7.8737 | 1.1812 |
| 1421459_a_at | Lrp8          | low density lipoprotein receptor-related protein 8, apolipoprotein e receptor                  | NM_053073 | 6.2582  | 5.0782 | 1.1800 |
| 1421271_at   | Sh3rf1        | SH3 domain containing ring finger 1                                                            | BE305862  | 6.2125  | 5.0331 | 1.1794 |
| 1426184_a_at | Pdcd6ip       | programmed cell death 6 interacting protein                                                    | AJ005074  | 6.9835  | 5.8041 | 1.1793 |
| 1427322_at   | Brwd1         | bromodomain and WD repeat domain containing 1                                                  | BQ031260  | 6.6421  | 5.4627 | 1.1793 |
| 1455143_at   | Nlgn2         | neuroligin 2                                                                                   | AU042744  | 9.0630  | 7.8839 | 1.1791 |
| 1442514_a_at |               |                                                                                                | BI660702  | 5.0890  | 3.9101 | 1.1789 |
| 1434468_at   | Otud4         | OTU domain containing 4                                                                        | BM238914  | 10.8800 | 9.7020 | 1.1780 |
| 1424372_at   | Mrpl32        | mitochondrial ribosomal protein L32                                                            | AF279255  | 10.7032 | 9.5253 | 1.1779 |
| 1444543_at   |               |                                                                                                | BI901592  | 5.6555  | 4.4777 | 1.1778 |
| 1439857_at   |               |                                                                                                | BB206180  | 6.4811  | 5.3035 | 1.1775 |
| 1436186_at   | E2f8          | E2F transcription factor 8                                                                     | BM247465  | 9.7922  | 8.6155 | 1.1767 |
| 1436229_at   | Fam126b       | family with sequence similarity 126, member B                                                  | BB256501  | 7.7740  | 6.5981 | 1.1759 |
| 1460544_at   | Naa35         | N(alpha)-acetyltransferase 35, NatC auxiliary subunit                                          | BG083730  | 8.8914  | 7.7159 | 1.1755 |
| 1442336_at   |               |                                                                                                | BE334274  | 6.3197  | 5.1443 | 1.1753 |
| 1418035_a_at | Prim2         | DNA primase, p58 subunit                                                                       | NM_008922 | 9.4949  | 8.3199 | 1.1751 |
| 1437294_at   | Exosc10       | exosome component 10                                                                           | BB198074  | 7.8510  | 6.6767 | 1.1743 |
| 1436188_a_at | Ndrp4         | N-myc downstream regulated gene 4                                                              | AI837704  | 9.1994  | 8.0272 | 1.1722 |
| 1425895_a_at | Id1           | inhibitor of DNA binding 1                                                                     | U43884    | 10.5907 | 9.4193 | 1.1715 |
| 1429049_at   | Nuak2         | NUAK family, SNF1-like kinase, 2                                                               | AK004737  | 8.7349  | 7.5638 | 1.1711 |
| 1423879_at   | D030056L22Rik | RIKEN cDNA D030056L22 gene                                                                     | BC020125  | 9.6176  | 8.4466 | 1.1710 |
| 1449283_a_at | Mapk12        | mitogen-activated protein kinase 12                                                            | BC021640  | 9.1570  | 7.9861 | 1.1710 |
| 1451847_s_at | Arid4b        | AT rich interactive domain 4B (RBP1-like)                                                      | BC024724  | 7.5261  | 6.3554 | 1.1707 |
| 1452517_at   | Plekhh1       | pleckstrin homology domain containing, family H (with MyTH4 domain) member 1                   | BC006045  | 5.3054  | 4.1349 | 1.1705 |
| 1438255_at   | Foxn3         | forkhead box N3                                                                                | BM196962  | 7.5434  | 6.3729 | 1.1705 |
| 1448100_at   | 4833439L19Rik | RIKEN cDNA 4833439L19 gene                                                                     | NM_133797 | 10.4425 | 9.2723 | 1.1702 |
| 1418831_at   | Pkp3          | plakophilin 3                                                                                  | AW475993  | 6.7309  | 5.5610 | 1.1699 |
| 1460188_at   | Ptpn6         | protein tyrosine phosphatase, non-receptor type 6                                              | NM_013545 | 8.3846  | 7.2147 | 1.1699 |
| 1416368_at   | Gsta4         | glutathione S-transferase, alpha 4                                                             | NM_010357 | 7.9141  | 6.7443 | 1.1699 |

|              |               |                                                                              |           |         |         |        |
|--------------|---------------|------------------------------------------------------------------------------|-----------|---------|---------|--------|
| 1431039_at   | Otud4         | OTU domain containing 4                                                      | BB652005  | 5.5282  | 4.3588  | 1.1694 |
| 1437892_at   | Zkscan3       | zinc finger with KRAB and SCAN domains 3                                     | BQ084812  | 7.1383  | 5.9694  | 1.1689 |
| 1440427_at   | Uvrug         | UV radiation resistance associated gene                                      | BB127176  | 5.8957  | 4.7271  | 1.1686 |
| 1429599_a_at | Mthfd2l       | methylenetetrahydrofolate dehydrogenase (NADP+ dependent) 2-like             | AK003824  | 9.4880  | 8.3199  | 1.1681 |
| 1418099_at   | Tnfrsf1b      | tumor necrosis factor receptor superfamily, member 1b                        | M60469    | 8.2894  | 7.1215  | 1.1679 |
| 1419207_at   | Zfp37         | zinc finger protein 37                                                       | NM_009554 | 7.4502  | 6.2831  | 1.1671 |
| 1426569_a_at | Frk           | fyn-related kinase                                                           | BB787292  | 5.8411  | 4.6741  | 1.1670 |
| 1453777_a_at | Ndst3         | N-deacetylase/N-sulfotransferase (heparan glucosaminyl) 3                    | AK014990  | 5.0013  | 3.8342  | 1.1670 |
| 1423164_at   |               |                                                                              | AK010724  | 7.5045  | 6.3376  | 1.1668 |
| 1423418_at   | Fdps          | farnesyl diphosphate synthetase                                              | BI247584  | 12.2482 | 11.0825 | 1.1657 |
| 1429449_at   | Samd4         | sterile alpha motif domain containing 4                                      | BF319665  | 7.3855  | 6.2200  | 1.1655 |
| 1430210_at   | Pgpep1l       | pyroglutamyl-peptidase I-like                                                | AK021221  | 5.1000  | 3.9350  | 1.1650 |
| 1431183_at   | 1700066M21Rik | RIKEN cDNA 1700066M21 gene                                                   | AA109251  | 5.2685  | 4.1035  | 1.1650 |
| 1435635_at   | Pcmt1         | protein-L-isoaspartate (D-aspartate) O-methyltransferase domain containing 1 | BB549335  | 7.1239  | 5.9590  | 1.1649 |
| 1431279_s_at | Ttl5          | tubulin tyrosine ligase-like family, member 5                                | AK016145  | 8.0618  | 6.8973  | 1.1645 |
| 1425481_at   | Cnot6l        | CCR4-NOT transcription complex, subunit 6-like                               | BC018506  | 8.6776  | 7.5137  | 1.1639 |
| 1458489_at   | Gm19729       | predicted gene, 19729                                                        | BM938362  | 5.5405  | 4.3767  | 1.1638 |
| 1417534_at   | Itgb5         | integrin beta 5                                                              | NM_010580 | 9.9490  | 8.7853  | 1.1637 |
| 1428416_at   | Fam164a       | family with sequence similarity 164, member A                                | BE198251  | 8.3490  | 7.1853  | 1.1637 |
| 1419486_at   | Foxc1         | forkhead box C1                                                              | BB759833  | 8.3585  | 7.1952  | 1.1633 |
| 1431182_at   | Hspa8         | heat shock protein 8                                                         | AK004608  | 8.0397  | 6.8770  | 1.1627 |
| 1455185_s_at | Phf16         | PHD finger protein 16                                                        | BG064477  | 7.3629  | 6.2005  | 1.1624 |
| 1416469_at   | Luzp1         | leucine zipper protein 1                                                     | BB705823  | 9.6931  | 8.5309  | 1.1622 |
| 1428074_at   | Tmem158       | transmembrane protein 158                                                    | BE981853  | 7.8983  | 6.7365  | 1.1618 |
| 1436804_s_at | Scyl1         | SCY1-like 1 (S. cerevisiae)                                                  | AU016501  | 9.2341  | 8.0726  | 1.1615 |
| 1446543_at   | Gcn11         | GCN1 general control of amino-acid synthesis 1-like 1 (yeast)                | BB160373  | 5.7743  | 4.6127  | 1.1615 |
| 1442706_at   | Nelf          | nasal embryonic LHRH factor                                                  | BB425163  | 6.3919  | 5.2306  | 1.1612 |
| 1444583_at   | Nasp          | nuclear autoantigenic sperm protein (histone-binding)                        | AW741754  | 6.2582  | 5.0970  | 1.1612 |
| 1438519_at   | Klhl24        | kelch-like 24 (Drosophila)                                                   | BM124262  | 5.3337  | 4.1735  | 1.1602 |
| 1428724_at   | Pcf11         | cleavage and polyadenylation factor subunit homolog (S. cerevisiae)          | BB283573  | 6.5881  | 5.4289  | 1.1591 |
| 1459218_at   | Heatr7a       | HEAT repeat containing 7A                                                    | BB142087  | 6.2549  | 5.0970  | 1.1579 |
| 1449414_at   | Zfp53         | zinc finger protein 53                                                       | NM_013843 | 8.7716  | 7.6138  | 1.1578 |
| 1450693_at   | Rgs17         | regulator of G-protein signaling 17                                          | NM_019958 | 9.5803  | 8.4229  | 1.1574 |
| 1435467_at   | Fgd6          | FYVE, RhoGEF and PH domain containing 6                                      | BM936783  | 7.2562  | 6.0989  | 1.1573 |
| 1447781_s_at | Trmt10a       | tRNA methyltransferase 10 homolog A (S. cerevisiae)                          | AV214521  | 8.0779  | 6.9213  | 1.1566 |
| 1437180_at   | Snrnp48       | small nuclear ribonucleoprotein 48 (U11/U12)                                 | BE824567  | 7.7984  | 6.6421  | 1.1564 |
| 1453061_at   | Elac1         | elaC homolog 1 (E. coli)                                                     | AK011449  | 7.2050  | 6.0489  | 1.1560 |
| 1444689_at   | Wdr67         | WD repeat domain 67                                                          | BM240057  | 8.1594  | 7.0038  | 1.1556 |
| 1427705_a_at | Nfkb1         | nuclear factor of kappa light polypeptide gene enhancer in B cells 1, p105   | L28118    | 9.9492  | 8.7940  | 1.1552 |
| 1418070_at   | Cdyl          | chromodomain protein, Y chromosome-like                                      | AF081260  | 8.3763  | 7.2212  | 1.1551 |
| 1452312_at   | 2810002D19Rik | RIKEN cDNA 2810002D19 gene                                                   | BC022909  | 6.9332  | 5.7781  | 1.1551 |
| 1453392_at   | Ttc39b        | tetratricopeptide repeat domain 39B                                          | AK007856  | 6.9332  | 5.7781  | 1.1551 |
| 1430000_at   | B230117O15Rik | RIKEN cDNA B230117O15 gene                                                   | AK020978  | 6.7928  | 5.6387  | 1.1541 |
| 1451458_at   | Tmem2         | transmembrane protein 2                                                      | BC019745  | 9.4479  | 8.2940  | 1.1539 |
| 1428294_at   | Zfp259        | zinc finger protein 259                                                      | AK016551  | 6.6079  | 5.4544  | 1.1535 |
| 1434076_at   | Wdr37         | WD repeat domain 37                                                          | AV222037  | 8.4394  | 7.2872  | 1.1523 |
| 1444647_at   | Plaa          | phospholipase A2, activating protein                                         | BB532258  | 5.0544  | 3.9024  | 1.1520 |
| 1432147_at   | 4930447F24Rik | RIKEN cDNA 4930447F24 gene                                                   | AK015404  | 6.4205  | 5.2685  | 1.1520 |
| 1453181_x_at | Plscr1        | phospholipid scramblase 1                                                    | BF319989  | 9.8535  | 8.7023  | 1.1511 |
| 1438650_x_at | Gja1          | gap junction protein, alpha 1                                                | AV330726  | 10.2093 | 9.0585  | 1.1508 |
| 1421307_at   | Car13         | carbonic anhydrase 13                                                        | AK010166  | 7.9309  | 6.7803  | 1.1507 |
| 1417200_at   | Tmem183a      | transmembrane protein 183A                                                   | AK007779  | 9.4537  | 8.3032  | 1.1505 |
| 1426325_at   | Kif1c         | kinesin family member 1C                                                     | AB074017  | 6.6275  | 5.4771  | 1.1504 |
| 1442316_x_at | Trp53bp1      | transformation related protein 53 binding protein 1                          | BB119893  | 5.3765  | 4.2261  | 1.1504 |
| 1457302_at   | Slc20a2       | solute carrier family 20, member 2                                           | BG144370  | 7.1176  | 5.9673  | 1.1504 |
| 1452434_s_at | Dgcr6         | DiGeorge syndrome critical region gene 6                                     | AF021031  | 9.4969  | 8.3497  | 1.1473 |



|              |               |                                                                     |           |         |         |        |
|--------------|---------------|---------------------------------------------------------------------|-----------|---------|---------|--------|
| 1456133_x_at | Itgb5         | integrin beta 5                                                     | BB543646  | 9.7703  | 8.6240  | 1.1463 |
| 1457383_at   |               |                                                                     | BM222431  | 5.5405  | 4.3943  | 1.1461 |
| 1448978_at   | Ngef          | neuronal guanine nucleotide exchange factor                         | NM_019867 | 7.0337  | 5.8877  | 1.1460 |
| 1450607_s_at |               |                                                                     | NM_031250 | 6.0175  | 4.8719  | 1.1456 |
| 1424037_at   | Itpka         | inositol 1,4,5-trisphosphate 3-kinase A                             | BC027291  | 5.4380  | 4.2924  | 1.1456 |
| 1427233_at   | Tshz1         | teashirt zinc finger family member 1                                | AV291373  | 9.7185  | 8.5732  | 1.1454 |
| 1436442_at   | Ptpn14        | protein tyrosine phosphatase, non-receptor type 14                  | AV230438  | 6.9835  | 5.8382  | 1.1453 |
| 1416101_a_at | Hist1h1c      | histone cluster 1, H1c                                              | NM_015786 | 8.5042  | 7.3594  | 1.1448 |
| 1454890_at   | Amot          | angiomin                                                            | BG067039  | 9.3283  | 8.1843  | 1.1440 |
| 1444416_at   | Cenpa         | centromere protein A                                                | BI649935  | 8.5825  | 7.4391  | 1.1434 |
| 1448171_at   | Siah2         | seven in absentia 2                                                 | AA414485  | 8.7154  | 7.5721  | 1.1433 |
| 1421105_at   | Jag1          | jagged 1                                                            | AA880220  | 5.5610  | 4.4177  | 1.1432 |
| 1452008_at   | Ttc39b        | tetratricopeptide repeat domain 39B                                 | AK018685  | 8.5025  | 7.3594  | 1.1431 |
| 1439233_at   |               |                                                                     | BB368592  | 5.5405  | 4.3981  | 1.1423 |
| 1435059_at   | Asap1         | ArfGAP with SH3 domain, ankyrin repeat and PH domain1               | BM937495  | 10.2312 | 9.0889  | 1.1423 |
| 1418905_at   | Nubp1         | nucleotide binding protein 1                                        | NM_011955 | 9.3096  | 8.1673  | 1.1422 |
| 1433935_at   | AU020206      | expressed sequence AU020206                                         | BI151331  | 9.2585  | 8.1166  | 1.1419 |
| 1436871_at   | Srsf7         | serine/arginine-rich splicing factor 7                              | BE825013  | 8.4752  | 7.3333  | 1.1419 |
| 1460384_a_at | Arid4b        | AT rich interactive domain 4B (RBP1-like)                           | BC024724  | 7.5144  | 6.3729  | 1.1415 |
| 1429852_at   | Ccdc57        | coiled-coil domain containing 57                                    | AK017054  | 5.1786  | 4.0372  | 1.1414 |
| 1428171_at   | Prpf39        | PRP39 pre-mRNA processing factor 39 homolog (yeast)                 | BB460975  | 9.1832  | 8.0419  | 1.1413 |
| 1452779_at   | Ube2ql1       | ubiquitin-conjugating enzyme E2Q family-like 1                      | AK014009  | 5.7245  | 4.5838  | 1.1407 |
| 1444435_at   | Vps13b        | vacuolar protein sorting 13B (yeast)                                | BM206224  | 7.0284  | 5.8877  | 1.1406 |
| 1421884_at   | Sos1          | son of sevenless homolog 1 (Drosophila)                             | BB471450  | 8.0779  | 6.9382  | 1.1397 |
| 1420171_s_at | Myh9          | myosin, heavy polypeptide 9, non-muscle                             | C80049    | 12.2520 | 11.1124 | 1.1397 |
| 1421344_a_at | Jub           | ajuba                                                               | NM_010590 | 10.0903 | 8.9519  | 1.1384 |
| 1449528_at   | Figf          | c-fos induced growth factor                                         | NM_010216 | 6.6275  | 5.4900  | 1.1375 |
| 1452151_at   | Gramd4        | GRAM domain containing 4                                            | BC021523  | 9.9836  | 8.8466  | 1.1369 |
| 1444500_at   | Ahsa1         | AHA1, activator of heat shock protein ATPase 1                      | AV321215  | 6.5133  | 5.3765  | 1.1368 |
| 1441670_at   |               |                                                                     | BB361748  | 5.3054  | 4.1689  | 1.1365 |
| 1426825_at   | Fmnl3         | formin-like 3                                                       | BB138853  | 8.8335  | 7.6973  | 1.1363 |
| 1425837_a_at | Ccrn4l        | CCR4 carbon catabolite repression 4-like (S. cerevisiae)            | AF199491  | 9.9970  | 8.8613  | 1.1357 |
| 1416915_at   | Msh6          | mutS homolog 6 (E. coli)                                            | U42190    | 11.1947 | 10.0590 | 1.1357 |
| 1451428_x_at | Egfl7         | EGF-like domain 7                                                   | BC024610  | 7.8295  | 6.6941  | 1.1354 |
| 1424060_at   | Neil3         | nei like 3 (E. coli)                                                | BC024921  | 7.8060  | 6.6707  | 1.1353 |
| 1438316_a_at | Ccdc102a      | coiled-coil domain containing 102A                                  | BB375402  | 7.8757  | 6.7405  | 1.1352 |
| 1417736_at   | Smc6          | structural maintenance of chromosomes 6                             | AV281575  | 9.3471  | 8.2121  | 1.1350 |
| 1416933_at   | Por           | P450 (cytochrome) oxidoreductase                                    | NM_008898 | 8.8751  | 7.7404  | 1.1347 |
| 1441466_at   | Tra2b         | transformer 2 beta homolog (Drosophila)                             | BG066615  | 5.6912  | 4.5566  | 1.1346 |
| 1445443_at   |               |                                                                     | BM207275  | 6.6564  | 5.5219  | 1.1346 |
| 1450378_at   | Tapbp         | TAP binding protein                                                 | AF043943  | 7.8961  | 6.7616  | 1.1344 |
| 1455997_a_at | Uqcrb         | ubiquinol-cytochrome c reductase binding protein                    | AV214853  | 13.0463 | 11.9121 | 1.1342 |
| 1423933_a_at | 1600029D21Rik | RIKEN cDNA 1600029D21 gene                                          | BC022950  | 5.4305  | 4.2966  | 1.1338 |
| 1416342_at   | Tnc           | tenascin C                                                          | NM_011607 | 5.4235  | 4.2900  | 1.1334 |
| 1438310_at   |               |                                                                     | BB353853  | 7.6668  | 6.5335  | 1.1333 |
| 1445198_at   | Kdm6a         | lysine (K)-specific demethylase 6A                                  | BB306686  | 6.0989  | 4.9657  | 1.1332 |
| 1455869_at   |               |                                                                     | BG862223  | 6.0989  | 4.9657  | 1.1332 |
| 1451734_a_at | Dbn1          | drebrin 1                                                           | AB064321  | 6.6941  | 5.5610  | 1.1331 |
| 1422074_at   | Cdx2          | caudal type homeobox 2                                              | NM_007673 | 6.0005  | 4.8677  | 1.1328 |
| 1420505_a_at | Stxbp1        | syntaxin binding protein 1                                          | AF326545  | 9.6907  | 8.5579  | 1.1328 |
| 1431530_a_at | Tspan5        | tetraspanin 5                                                       | AK015705  | 6.8967  | 5.7647  | 1.1319 |
| 1443673_x_at |               |                                                                     | BB710847  | 6.0550  | 4.9253  | 1.1297 |
| 1438789_s_at | Dpysl3        | dihydropyrimidinase-like 3                                          | AV161550  | 8.8476  | 7.7180  | 1.1296 |
| 1418975_at   | Nckipsd       | NCK interacting protein with SH3 domain                             | NM_030729 | 7.4669  | 6.3376  | 1.1293 |
| 1460667_at   | U90926        | cDNA sequence U90926                                                | NM_020562 | 6.4242  | 5.2962  | 1.1280 |
| 1433598_at   | Arglu1        | arginine and glutamate rich 1                                       | BG093966  | 8.8884  | 7.7607  | 1.1276 |
| 1431087_at   | Spc24         | SPC24, NDC80 kinetochore complex component, homolog (S. cerevisiae) | BF577722  | 9.6238  | 8.4962  | 1.1276 |
| 1421499_a_at | Ptpn14        | protein tyrosine phosphatase, non-receptor type 14                  | NM_008976 | 6.9905  | 5.8632  | 1.1274 |
| 1452836_at   | Lpin2         | lipin 2                                                             | AK021389  | 9.1999  | 8.0731  | 1.1268 |

|              |               |                                                                                     |           |         |         |        |
|--------------|---------------|-------------------------------------------------------------------------------------|-----------|---------|---------|--------|
| 1416862_at   | Stam          | signal transducing adaptor molecule (SH3 domain and ITAM motif) 1                   | NM_011484 | 9.1127  | 7.9861  | 1.1266 |
| 1445718_at   |               |                                                                                     | BM237480  | 5.9119  | 4.7856  | 1.1263 |
| 1456296_at   | 5830418K08Rik | RIKEN cDNA 5830418K08 gene                                                          | BM214084  | 5.9119  | 4.7857  | 1.1262 |
| 1457561_at   | Itga5         | integrin alpha 5 (fibronectin receptor alpha)                                       | AW544851  | 5.6931  | 4.5673  | 1.1258 |
| 1438692_at   | Gtf3c4        | general transcription factor IIIC, polypeptide 4                                    | BG069995  | 7.0016  | 5.8759  | 1.1257 |
| 1449097_at   | Txnrd2        | thioredoxin reductase 2                                                             | NM_013711 | 7.7384  | 6.6129  | 1.1255 |
| 1426653_at   | Mcm3          | minichromosome maintenance deficient 3 (S. cerevisiae)                              | BI658327  | 8.6837  | 7.5584  | 1.1253 |
| 1429879_at   | 0610037L13Rik | RIKEN cDNA 0610037L13 gene                                                          | AK003575  | 7.3681  | 6.2429  | 1.1252 |
| 1455247_at   | Amotl1        | angiomin-like 1                                                                     | BB767281  | 9.4577  | 8.3333  | 1.1243 |
| 1425333_at   | Rab43         | RAB43, member RAS oncogene family                                                   | BC010248  | 7.6672  | 6.5434  | 1.1238 |
| 1458501_at   | Vapb          | vesicle-associated membrane protein, associated protein B and C                     | BB371361  | 7.2436  | 6.1198  | 1.1238 |
| 1431332_a_at | Terf1         | telomeric repeat binding factor 1                                                   | BG142548  | 8.4743  | 7.3506  | 1.1237 |
| 1440020_at   |               |                                                                                     | BB212045  | 6.8391  | 5.7154  | 1.1237 |
| 1416268_at   | Ets2          | E26 avian leukemia oncogene 2, 3' domain                                            | BC005486  | 9.6096  | 8.4860  | 1.1236 |
| 1460400_at   | Spast         | spastin                                                                             | AK007793  | 9.1846  | 8.0618  | 1.1227 |
| 1429556_at   | Tead1         | TEA domain family member 1                                                          | BM214769  | 10.5985 | 9.4759  | 1.1226 |
| 1456553_at   |               |                                                                                     | BB198687  | 5.4394  | 4.3171  | 1.1223 |
| 1417158_at   | Zxdc          | ZXD family zinc finger C                                                            | BB238025  | 7.9993  | 6.8770  | 1.1223 |
| 1426652_at   | Mcm3          | minichromosome maintenance deficient 3 (S. cerevisiae)                              | BI658327  | 10.4866 | 9.3646  | 1.1221 |
| 1451233_at   | Traf2         | TNF receptor-associated factor 2                                                    | BC003801  | 8.5789  | 7.4571  | 1.1218 |
| 1430778_a_at | Nubp1         | nucleotide binding protein 1                                                        | AK020876  | 8.6283  | 7.5068  | 1.1215 |
| 1452999_at   | Smndc1        | survival motor neuron domain containing 1                                           | BG071121  | 9.9103  | 8.7889  | 1.1215 |
| 1439264_x_at | Lasp1         | LIM and SH3 protein 1                                                               | BB433798  | 10.8949 | 9.7735  | 1.1214 |
| 1422688_a_at | Nras          | neuroblastoma ras oncogene                                                          | BB018528  | 9.7996  | 8.6787  | 1.1209 |
| 1454995_at   | Ddah1         | dimethylarginine dimethylaminohydrolase 1                                           | AW556888  | 8.5917  | 7.4710  | 1.1207 |
| 1421635_at   | Cnm4          | cyclin M4                                                                           | NM_033570 | 5.9404  | 4.8209  | 1.1195 |
| 1455696_a_at | Prpf4b        | PRP4 pre-mRNA processing factor 4 homolog B (yeast)                                 | BB344827  | 9.9433  | 8.8240  | 1.1193 |
| 1428760_at   | Snpsc3        | small nuclear RNA activating complex, polypeptide 3                                 | AW537061  | 9.0299  | 7.9112  | 1.1187 |
| 1436398_at   |               |                                                                                     | BB033554  | 5.0970  | 3.9786  | 1.1183 |
| 1428388_at   | Tnks2         | tankyrase, TRF1-interacting ankyrin-related ADP-ribose polymerase 2                 | BB339554  | 11.8535 | 10.7352 | 1.1183 |
| 1425271_at   | Psmc3ip       | proteasome (prosome, macropain) 26S subunit, ATPase 3, interacting protein          | AB000121  | 9.8098  | 8.6919  | 1.1179 |
| 1431993_a_at | Rnf38         | ring finger protein 38                                                              | AK006888  | 6.4574  | 5.3414  | 1.1160 |
| 1428010_at   | Timm9         | translocase of inner mitochondrial membrane 9 homolog (yeast)                       | BC028435  | 5.8877  | 4.7725  | 1.1152 |
| 1419270_a_at | Dut           | deoxyuridine triphosphatase                                                         | AF091101  | 11.5111 | 10.3960 | 1.1151 |
| 1416401_at   | Cd82          | CD82 antigen                                                                        | NM_007656 | 10.1498 | 9.0349  | 1.1149 |
| 1450722_at   | Nup50         | nucleoporin 50                                                                      | NM_016714 | 10.8367 | 9.7220  | 1.1147 |
| 1443781_at   |               |                                                                                     | AW050030  | 5.7846  | 4.6699  | 1.1147 |
| 1443027_at   |               |                                                                                     | BB667435  | 5.2831  | 4.1689  | 1.1142 |
| 1435398_at   | Stxbp5        | syntaxin binding protein 5 (tomosyn)                                                | BQ176171  | 8.3304  | 7.2167  | 1.1137 |
| 1429505_at   | Nbeal1        | neurobeachin like 1                                                                 | AK010199  | 8.9222  | 7.8087  | 1.1135 |
| 1416779_at   | Sdpr          | serum deprivation response                                                          | BE197945  | 7.7180  | 6.6049  | 1.1130 |
| 1434254_at   | Gna11         | guanine nucleotide binding protein, alpha 11                                        | BM235739  | 8.7225  | 7.6097  | 1.1128 |
| 1440391_at   | Gcn11         | GCN1 general control of amino-acid synthesis 1-like 1 (yeast)                       | BB309501  | 5.9357  | 4.8229  | 1.1128 |
| 1420172_at   | Myh9          | myosin, heavy polypeptide 9, non-muscle                                             | C80049    | 10.7673 | 9.6546  | 1.1127 |
| 1425217_a_at | Synj2         | synaptojanin 2                                                                      | AF041862  | 6.5286  | 5.4161  | 1.1125 |
| 1417877_at   | Eepd1         | endonuclease/exonuclease/phosphatase family domain containing 1                     | NM_026189 | 5.6110  | 4.4990  | 1.1120 |
| 1453972_x_at | Med1          | mediator complex subunit 1                                                          | AK005207  | 5.6685  | 4.5566  | 1.1119 |
| 1416778_at   | Sdpr          | serum deprivation response                                                          | BE197945  | 8.6625  | 7.5511  | 1.1115 |
| 1418194_at   | Galnt10       | UDP-N-acetyl-alpha-D-galactosamine:polypeptide N-acetylgalactosaminyltransferase 10 | BG965198  | 7.3506  | 6.2392  | 1.1114 |
| 1420999_at   | Cnot4         | CCR4-NOT transcription complex, subunit 4                                           | AI448404  | 7.5015  | 6.3902  | 1.1113 |
| 1425687_at   | Cflar         | CASP8 and FADD-like apoptosis regulator                                             | BE284491  | 7.2656  | 6.1545  | 1.1111 |
| 1441546_at   | Mpp6          | membrane protein, palmitoylated 6 (MAGUK p55 subfamily member 6)                    | BB464777  | 6.6404  | 5.5301  | 1.1103 |

|              |               |                                                                            |           |         |         |        |
|--------------|---------------|----------------------------------------------------------------------------|-----------|---------|---------|--------|
| 1421042_at   | Arhgef2       | rho/rac guanine nucleotide exchange factor (GEF) 2                         | NM_008487 | 9.1264  | 8.0161  | 1.1103 |
| 1421265_a_at | Rbm38         | RNA binding motif protein 38                                               | NM_019547 | 8.4519  | 7.3417  | 1.1102 |
| 1429910_at   | 5-Mar         | membrane-associated ring finger (C3HC4) 5                                  | AK017741  | 7.4828  | 6.3729  | 1.1099 |
| 1438420_at   | Rbm39         | RNA binding motif protein 39                                               | AV019076  | 10.6238 | 9.5141  | 1.1096 |
| 1433863_at   | Btf3          | basic transcription factor 3                                               | AW556975  | 5.8297  | 4.7207  | 1.1090 |
| 1457454_at   |               |                                                                            | BG071065  | 5.9357  | 4.8266  | 1.1090 |
| 1437724_x_at | Pitpnm1       | phosphatidylinositol transfer protein, membrane-associated 1               | BB206460  | 10.3832 | 9.2743  | 1.1089 |
| 1418999_at   | 2310033P09Rik | RIKEN cDNA 2310033P09 gene                                                 | NM_024210 | 8.6799  | 7.5711  | 1.1088 |
| 1422910_s_at | Smc6          | structural maintenance of chromosomes 6                                    | AU022584  | 10.5757 | 9.4672  | 1.1085 |
| 1437570_at   | AI503301      | expressed sequence AI503301                                                | BM213851  | 6.9204  | 5.8119  | 1.1085 |
| 1436959_x_at | Nelf          | nasal embryonic LHRH factor                                                | BB311061  | 11.4639 | 10.3555 | 1.1084 |
| 1438435_at   | Acer3         | alkaline ceramidase 3                                                      | BB329313  | 8.0956  | 6.9873  | 1.1084 |
| 1425572_a_at | Asap1         | ArfGAP with SH3 domain, ankyrin repeat and PH domain1                      | BE943736  | 8.8464  | 7.7384  | 1.1081 |
| 1423174_a_at | Pard6b        | par-6 (partitioning defective 6) homolog beta (C. elegans)                 | BE953582  | 6.0018  | 4.8944  | 1.1075 |
| 1442061_at   | Btbd7         | BTB (POZ) domain containing 7                                              | BB199960  | 7.9985  | 6.8911  | 1.1074 |
| 1426370_at   | Far1          | fatty acyl CoA reductase 1                                                 | BG094874  | 8.6330  | 7.5259  | 1.1071 |
| 1444758_at   | 4930595D18Rik | RIKEN cDNA 4930595D18 gene                                                 | BG063053  | 5.3765  | 4.2697  | 1.1069 |
| 1426028_a_at | Cit           | citron                                                                     | AF086823  | 6.8313  | 5.7245  | 1.1068 |
| 1427894_at   | Vasn          | vasorin                                                                    | AK012169  | 8.5837  | 7.4774  | 1.1063 |
| 1425115_at   | Rbbp6         | retinoblastoma binding protein 6                                           | BC025874  | 6.2200  | 5.1139  | 1.1061 |
| 1418970_a_at | Bcl10         | B cell leukemia/lymphoma 10                                                | AF100339  | 10.5136 | 9.4077  | 1.1059 |
| 1436379_at   | Crtc3         | CREB regulated transcription coactivator 3                                 | AI429792  | 7.8253  | 6.7209  | 1.1044 |
| 1420774_a_at | Mgarp         | mitochondria localized glutamic acid rich protein                          | NM_026358 | 7.0394  | 5.9357  | 1.1037 |
| 1428937_at   | Atp2b1        | ATPase, Ca <sup>++</sup> transporting, plasma membrane 1                   | BI080417  | 9.9296  | 8.8260  | 1.1035 |
| 1455682_at   | Abl2          | v-abl Abelson murine leukemia viral oncogene 2 (arg, Abelson-related gene) | BG076081  | 9.3006  | 8.1974  | 1.1031 |
| 1416029_at   | Klf10         | Kruppel-like factor 10                                                     | NM_013692 | 10.0578 | 8.9548  | 1.1030 |
| 1437547_s_at |               |                                                                            | BB044517  | 7.1662  | 6.0634  | 1.1028 |
| 1447432_s_at | Zfp263        | zinc finger protein 263                                                    | AI326880  | 8.7978  | 7.6950  | 1.1028 |
| 1424559_at   | Rpap2         | RNA polymerase II associated protein 2                                     | BC021895  | 8.7358  | 7.6333  | 1.1025 |
| 1441477_at   | Calu          | calumenin                                                                  | BB120190  | 8.5581  | 7.4557  | 1.1024 |
| 1423524_at   | Mastl         | microtubule associated serine/threonine kinase-like                        | BF021309  | 8.0779  | 6.9758  | 1.1021 |
| 1426329_s_at | Baalc         | brain and acute leukemia, cytoplasmic                                      | AF371320  | 7.0840  | 5.9820  | 1.1019 |
| 1457398_at   |               |                                                                            | BB364558  | 6.2392  | 5.1374  | 1.1018 |
| 1459470_at   |               |                                                                            | AW546412  | 5.0037  | 3.9024  | 1.1013 |
| 1418007_at   |               |                                                                            | BM932567  | 10.2490 | 9.1482  | 1.1008 |
| 1415795_at   | Spin1         | spindlin 1                                                                 | BM228780  | 7.4731  | 6.3729  | 1.1003 |
| 1438003_at   | Papd7         | PAP associated domain containing 7                                         | BB324894  | 7.6662  | 6.5662  | 1.1000 |
| 1431744_a_at | Smap1         | stromal membrane-associated protein 1                                      | AK014888  | 6.2918  | 5.1918  | 1.1000 |
| 1421654_a_at | Lmna          | lamin A                                                                    | NM_019390 | 11.3358 | 10.2359 | 1.1000 |
| 1433974_at   | Sephs1        | selenophosphate synthetase 1                                               | BB293127  | 9.5029  | 8.4032  | 1.0997 |
| 1451178_at   |               |                                                                            | BC022162  | 10.8540 | 9.7543  | 1.0997 |
| 1446914_at   | C80425        | expressed sequence C80425                                                  | C80425    | 5.2685  | 4.1689  | 1.0996 |
| 1426812_a_at | Fam129b       | family with sequence similarity 129, member B                              | BF166604  | 11.0542 | 9.9560  | 1.0982 |
| 1430985_at   | 1810027O10Rik | RIKEN cDNA 1810027O10 gene                                                 | BG088666  | 10.7962 | 9.6981  | 1.0981 |
| 1438271_at   | Lpp           | LIM domain containing preferred translocation partner in lipoma            | BB667361  | 7.2562  | 6.1582  | 1.0980 |
| 1426554_a_at | Pgam1         | phosphoglycerate mutase 1                                                  | BI407347  | 11.6388 | 10.5409 | 1.0979 |
| 1438149_at   | Pif1          | PIF1 5'-to-3' DNA helicase homolog (S. cerevisiae)                         | AV167755  | 5.3765  | 4.2786  | 1.0979 |
| 1448207_at   | Lasp1         | LIM and SH3 protein 1                                                      | BC010840  | 6.6275  | 5.5301  | 1.0974 |
| 1456706_at   | 4833441D16Rik | RIKEN cDNA 4833441D16 gene                                                 | BE628134  | 6.5634  | 5.4662  | 1.0972 |
| 1430415_at   | Phf6          | PHD finger protein 6                                                       | BF147362  | 6.8327  | 5.7356  | 1.0971 |
| 1423006_at   | Pim1          | proviral integration site 1                                                | NM_008842 | 6.7928  | 5.6970  | 1.0958 |
| 1456370_s_at | 0610037L13Rik | RIKEN cDNA 0610037L13 gene                                                 | BB044881  | 6.9835  | 5.8877  | 1.0957 |
| 1418036_at   | Prim2         | DNA primase, p58 subunit                                                   | NM_008922 | 9.6430  | 8.5477  | 1.0954 |
| 1445381_at   |               |                                                                            | BQ176966  | 6.8729  | 5.7781  | 1.0949 |
| 1453171_s_at | Ppm1a         | protein phosphatase 1A, magnesium dependent, alpha isoform                 | C85630    | 9.1520  | 8.0587  | 1.0933 |

|              |               |                                                               |           |         |         |        |
|--------------|---------------|---------------------------------------------------------------|-----------|---------|---------|--------|
| 1449464_at   | Kcnq1         | potassium voltage-gated channel, subfamily Q, member 1        | NM_008434 | 6.1477  | 5.0544  | 1.0933 |
| 1424511_at   | Aurka         | aurora kinase A                                               | U80932    | 11.0301 | 9.9374  | 1.0927 |
| 1447275_at   | Bbs12         | Bardet-Biedl syndrome 12 (human)                              | AI449447  | 7.5758  | 6.4845  | 1.0913 |
| 1434106_at   | Epm2aip1      | EPM2A (laforin) interacting protein 1                         | AV340515  | 8.7241  | 7.6333  | 1.0908 |
| 1441347_at   |               |                                                               | BB153954  | 5.9135  | 4.8229  | 1.0906 |
| 1446861_at   | Gns           | glucosamine (N-acetyl)-6-sulfatase                            | BB534930  | 6.0777  | 4.9877  | 1.0900 |
| 1444693_at   |               |                                                               | BG069383  | 5.5491  | 4.4597  | 1.0895 |
| 1436768_x_at | Arhgef40      | Rho guanine nucleotide exchange factor (GEF) 40               | BI412259  | 7.9742  | 6.8852  | 1.0890 |
| 1460262_a_at | 1700037H04Rik | RIKEN cDNA 1700037H04 gene                                    | NM_026091 | 9.3497  | 8.2615  | 1.0882 |
| 1449579_at   | Sh3yl1        | Sh3 domain YSC-like 1                                         | NM_013709 | 6.7703  | 5.6827  | 1.0876 |
| 1451417_at   | Brca1         | breast cancer 1                                               | U31625    | 7.6454  | 6.5578  | 1.0876 |
| 1424192_at   | 1500011H22Rik | RIKEN cDNA 1500011H22 gene                                    | BC019498  | 10.7700 | 9.6828  | 1.0872 |
| 1438516_at   | Rif1          | Rap1 interacting factor 1 homolog (yeast)                     | BB208938  | 6.8439  | 5.7567  | 1.0872 |
| 1453479_at   | 1700086P04Rik | RIKEN cDNA 1700086P04 gene                                    | AK007024  | 6.1281  | 5.0414  | 1.0868 |
| 1444007_at   | A830082K12Rik | RIKEN cDNA A830082K12 gene                                    | BB380706  | 5.6402  | 4.5537  | 1.0866 |
| 1416241_at   | Sec13         | SEC13 homolog (S. cerevisiae)                                 | NM_024206 | 10.8669 | 9.7817  | 1.0852 |
| 1436133_at   | Ccdc127       | coiled-coil domain containing 127                             | BB361173  | 6.0047  | 4.9195  | 1.0852 |
| 1433998_at   | 4933427D14Rik | RIKEN cDNA 4933427D14 gene                                    | BM199807  | 8.9515  | 7.8667  | 1.0848 |
| 1435086_s_at | Klhdc2        | kelch domain containing 2                                     | AV298107  | 11.2207 | 10.1359 | 1.0848 |
| 1438122_at   | 2900006K08Rik | RIKEN cDNA 2900006K08 gene                                    | AV278574  | 5.0544  | 3.9701  | 1.0843 |
| 1441764_at   | Prdm10        | PR domain containing 10                                       | BF730739  | 5.0544  | 3.9701  | 1.0843 |
| 1446280_at   |               |                                                               | BB472891  | 5.7515  | 4.6674  | 1.0841 |
| 1456878_at   | AI646023      | expressed sequence AI646023                                   | BE910952  | 5.2530  | 4.1689  | 1.0841 |
| 1434240_at   | 4632434I11Rik | RIKEN cDNA 4632434I11 gene                                    | BB463610  | 8.2916  | 7.2078  | 1.0838 |
| 1433101_at   | 9030419F21Rik | RIKEN cDNA 9030419F21 gene                                    | AK018519  | 7.2842  | 6.2005  | 1.0838 |
| 1454116_a_at | Mterfd1       | MTERF domain containing 1                                     | AK002299  | 10.4075 | 9.3239  | 1.0836 |
| 1428842_a_at | Ngfrap1       | nerve growth factor receptor (TNFRSF16) associated protein 1  | BI407690  | 11.8482 | 10.7648 | 1.0835 |
| 1440344_at   | Snord89       | small nucleolar RNA, C/D box 89                               | BB535821  | 5.8041  | 4.7207  | 1.0834 |
| 1430058_at   | Slbp          | stem-loop binding protein                                     | AK016826  | 7.0861  | 6.0033  | 1.0828 |
| 1416347_at   | Men1          | multiple endocrine neoplasia 1                                | AB023401  | 7.8215  | 6.7387  | 1.0828 |
| 1422495_a_at | Hmgn1         | high mobility group nucleosomal binding domain 1              | NM_008251 | 12.6625 | 11.5801 | 1.0824 |
| 1425196_a_at | Hint2         | histidine triad nucleotide binding protein 2                  | AF356874  | 5.5812  | 4.4990  | 1.0822 |
| 1426021_a_at | Cdc7          | cell division cycle 7 (S. cerevisiae)                         | AB018576  | 6.9450  | 5.8632  | 1.0818 |
| 1447869_x_at | Rhobtb3       | Rho-related BTB domain containing 3                           | AV047988  | 10.3071 | 9.2261  | 1.0809 |
| 1425162_at   | Rorb          | RAR-related orphan receptor beta                              | BC024842  | 6.3114  | 5.2306  | 1.0808 |
| 1447096_at   |               |                                                               | AU042527  | 5.4396  | 4.3588  | 1.0808 |
| 1434909_at   | Rragd         | Ras-related GTP binding D                                     | BF462770  | 5.6373  | 4.5566  | 1.0808 |
| 1445321_at   |               |                                                               | BG063377  | 6.3376  | 5.2576  | 1.0801 |
| 1420389_at   | Pax3          | paired box gene 3                                             | NM_008781 | 7.6927  | 6.6129  | 1.0799 |
| 1447787_x_at | Gjc1          | gap junction protein, gamma 1                                 | AV148957  | 9.5239  | 8.4445  | 1.0794 |
| 1455356_at   | Camsap1       | calmodulin regulated spectrin-associated protein 1            | BG064669  | 9.4582  | 8.3788  | 1.0793 |
| 1429390_at   | Acpl2         | acid phosphatase-like 2                                       | BB183525  | 8.4383  | 7.3594  | 1.0789 |
| 1415940_at   | Zfand2a       | zinc finger, AN1-type domain 2A                               | NM_133349 | 9.5029  | 8.4240  | 1.0789 |
| 1450938_at   | Pnn           | pinin                                                         | AV135835  | 9.1796  | 8.1009  | 1.0787 |
| 1433293_at   | Sdha          | succinate dehydrogenase complex, subunit A, flavoprotein (Fp) | AK005350  | 5.0488  | 3.9701  | 1.0787 |
| 1453655_at   | 2900005J15Rik | RIKEN cDNA 2900005J15 gene                                    | BB013287  | 5.1819  | 4.1035  | 1.0784 |
| 1449322_at   |               |                                                               | BC003761  | 10.7201 | 9.6430  | 1.0771 |
| 1422172_x_at | 2810408B13Rik | RIKEN cDNA 2810408B13 gene                                    | NM_029583 | 5.3054  | 4.2286  | 1.0767 |
| 1425760_a_at | Pitpnm1       | phosphatidylinositol transfer protein, membrane-associated 1  | AF006467  | 8.4354  | 7.3591  | 1.0763 |
| 1436354_at   | Dzip1l        | DAZ interacting protein 1-like                                | BE992423  | 8.3510  | 7.2747  | 1.0763 |
| 1416130_at   | Prnp          | prion protein                                                 | BE630020  | 9.8072  | 8.7309  | 1.0763 |
| 1456779_a_at | 4930414L22Rik | RIKEN cDNA 4930414L22 gene                                    | BQ176011  | 5.1716  | 4.0956  | 1.0760 |
| 1442596_at   | Klhdc2        | kelch domain containing 2                                     | BB105408  | 5.0791  | 4.0032  | 1.0759 |
| 1444971_at   |               |                                                               | AW553802  | 6.2005  | 5.1247  | 1.0758 |
| 1444371_at   | A630007B06Rik | RIKEN cDNA A630007B06 gene                                    | BB268463  | 5.8297  | 4.7540  | 1.0758 |
| 1425187_at   | Sel1l         | sel-1 suppressor of lin-12-like (C. elegans)                  | BC026816  | 8.4667  | 7.3912  | 1.0754 |
| 1434746_at   | Mga           | MAX gene associated                                           | BG797579  | 7.9727  | 6.8973  | 1.0754 |
| 1423978_at   | Sbk1          | SH3-binding kinase 1                                          | BC025837  | 5.1786  | 4.1035  | 1.0751 |
| 1425043_s_at | Ccdc163       | coiled-coil domain containing 163                             | BC022733  | 6.7217  | 5.6472  | 1.0745 |

|              |               |                                                                            |           |         |         |        |
|--------------|---------------|----------------------------------------------------------------------------|-----------|---------|---------|--------|
| 1425550_a_at | Prkar1a       | protein kinase, cAMP dependent regulatory, type I, alpha                   | BC005697  | 11.4207 | 10.3464 | 1.0743 |
| 1445418_at   | Smg6          | Smg-6 homolog, nonsense mediated mRNA decay factor ( <i>C. elegans</i> )   | BB743283  | 5.4443  | 4.3707  | 1.0737 |
| 1429412_at   | Eny2          | enhancer of yellow 2 homolog ( <i>Drosophila</i> )                         | AI595744  | 7.2935  | 6.2200  | 1.0735 |
| 1448250_at   | Clmp          | CXADR-like membrane protein                                                | BG072972  | 5.4443  | 4.3715  | 1.0728 |
| 1460542_s_at | Mdm4          | transformed mouse 3T3 cell double minute 4                                 | BQ173933  | 8.8177  | 7.7451  | 1.0725 |
| 1446158_at   |               |                                                                            | BB335821  | 5.3054  | 4.2333  | 1.0721 |
| 1436499_at   | Sgms1         | sphingomyelin synthase 1                                                   | AW985925  | 8.5270  | 7.4557  | 1.0713 |
| 1416246_a_at | Coro1a        | coronin, actin binding protein 1A                                          | BC002136  | 5.2399  | 4.1689  | 1.0710 |
| 1422955_at   | Syt17         | synaptotagmin XVII                                                         | NM_138649 | 5.7515  | 4.6812  | 1.0704 |
| 1456357_at   | Scai          | suppressor of cancer cell invasion                                         | BB037906  | 8.2848  | 7.2147  | 1.0701 |
| 1424574_at   | Tmed5         | transmembrane emp24 protein transport domain containing 5                  | BC020076  | 10.7656 | 9.6962  | 1.0694 |
| 1453823_a_at | Trmt13        | tRNA methyltransferase 13 homolog ( <i>S. cerevisiae</i> )                 | BG085812  | 7.3970  | 6.3276  | 1.0694 |
| 1446972_at   | D15Wsu126e    | DNA segment, Chr 15, Wayne State University 126, expressed                 | BG063165  | 6.6801  | 5.6110  | 1.0690 |
| 1423622_a_at | Ccn1          | cyclin L1                                                                  | BM250672  | 10.8036 | 9.7351  | 1.0685 |
| 1438805_at   | Ccnd3         | cyclin D3                                                                  | BE691816  | 6.4097  | 5.3414  | 1.0683 |
| 1451365_at   | Rbm19         | RNA binding motif protein 19                                               | BC025619  | 7.0503  | 5.9820  | 1.0683 |
| 1451246_s_at | Aurkb         | aurora kinase B                                                            | BC003261  | 10.0691 | 9.0015  | 1.0676 |
| 1433748_at   | Zdhc18        | zinc finger, DHHC domain containing 18                                     | BG073303  | 9.2939  | 8.2266  | 1.0673 |
| 1420526_at   | Dcbd2         | discoidin, CUB and LCCL domain containing 2                                | NM_028523 | 6.6279  | 5.5610  | 1.0669 |
| 1450146_at   | Ncs1          | neuronal calcium sensor 1                                                  | AU079041  | 6.6278  | 5.5610  | 1.0668 |
| 1437656_at   | Arhgef4       | Rho guanine nucleotide exchange factor (GEF) 4                             | AV319307  | 6.3729  | 5.3063  | 1.0666 |
| 1443340_at   | Micu1         | mitochondrial calcium uptake 1                                             | AV272277  | 5.5652  | 4.4990  | 1.0662 |
| 1437544_at   | Fubp1         | far upstream element (FUSE) binding protein 1                              | BB488001  | 7.5667  | 6.5005  | 1.0661 |
| 1420743_a_at | Ppp3cc        | protein phosphatase 3, catalytic subunit, gamma isoform                    | NM_008915 | 6.0989  | 5.0334  | 1.0655 |
| 1456274_at   |               |                                                                            | BB067544  | 6.1198  | 5.0544  | 1.0654 |
| 1434082_at   | Cdk17         | cyclin-dependent kinase 17                                                 | BM243464  | 10.1206 | 9.0558  | 1.0647 |
| 1417209_at   | Sertad2       | SERTA domain containing 2                                                  | NM_021372 | 10.0031 | 8.9385  | 1.0646 |
| 1420812_at   | Hdac7         | histone deacetylase 7                                                      | BB277517  | 7.4643  | 6.3997  | 1.0645 |
| 1417065_at   | Egr1          | early growth response 1                                                    | NM_007913 | 12.3319 | 11.2677 | 1.0642 |
| 1425019_at   | Ubx2a         | UBX domain protein 2A                                                      | AV174556  | 8.5490  | 7.4855  | 1.0635 |
| 1430653_at   | A930026B05Rik | RIKEN cDNA A930026B05 gene                                                 | AI481778  | 6.0047  | 4.9413  | 1.0634 |
| 1442384_at   |               |                                                                            | BG065559  | 5.0333  | 3.9701  | 1.0632 |
| 1420028_s_at | Mcm3          | minichromosome maintenance deficient 3 ( <i>S. cerevisiae</i> )            | C80350    | 11.4627 | 10.3997 | 1.0630 |
| 1460243_at   | Sptlc2        | serine palmitoyltransferase, long chain base subunit 2                     | BC003227  | 9.3425  | 8.2802  | 1.0624 |
| 1450895_a_at | Cox16         | COX16 cytochrome c oxidase assembly homolog ( <i>S. cerevisiae</i> )       | BF166756  | 8.8429  | 7.7805  | 1.0623 |
| 1451036_at   | Spg21         | spastic paraplegia 21 homolog (human)                                      | BB095517  | 10.0860 | 9.0238  | 1.0622 |
| 1446319_at   | Asb7          | ankyrin repeat and SOCS box-containing 7                                   | BB446215  | 5.1652  | 4.1035  | 1.0617 |
| 1455495_at   | Abl2          | v-abl Abelson murine leukemia viral oncogene 2 (arg, Abelson-related gene) | BB667497  | 10.0565 | 8.9950  | 1.0615 |
| 1452956_a_at | Ifi2711       | interferon, alpha-inducible protein 27 like 1                              | BI655075  | 11.1380 | 10.0766 | 1.0613 |
| 1457803_at   |               |                                                                            | BI134709  | 6.2200  | 5.1587  | 1.0613 |
| 1455125_at   | Acap1         | ArfGAP with coiled-coil, ankyrin repeat and PH domains 1                   | BB115902  | 6.0270  | 4.9657  | 1.0612 |
| 1443491_at   |               |                                                                            | BG802688  | 5.2940  | 4.2333  | 1.0607 |
| 1460733_at   | Unc119b       | unc-119 homolog B ( <i>C. elegans</i> )                                    | BB390422  | 9.5386  | 8.4779  | 1.0607 |
| 1453750_x_at | Pitpnc1       | phosphatidylinositol transfer protein, cytoplasmic 1                       | BI654600  | 6.1198  | 5.0597  | 1.0601 |
| 1455112_at   | Aifm2         | apoptosis-inducing factor, mitochondrion-associated 2                      | BB772185  | 7.8309  | 6.7709  | 1.0600 |
| 1454642_a_at | Comm3         | COMM domain containing 3                                                   | BB230296  | 9.8290  | 8.7693  | 1.0597 |
| 1458512_at   | Tle3          | transducin-like enhancer of split 3, homolog of <i>Drosophila</i> E(spl)   | AW490470  | 6.5578  | 5.4985  | 1.0593 |
| 1423463_a_at | D2Erd750e     | DNA segment, Chr 2, ERATO Doi 750, expressed                               | AK012148  | 9.5445  | 8.4860  | 1.0585 |
| 1421872_at   | Rab24         | RAB24, member RAS oncogene family                                          | NM_009000 | 9.9966  | 8.9383  | 1.0583 |
| 1438215_at   | Srsf3         | serine/arginine-rich splicing factor 3                                     | BB517005  | 7.9021  | 6.8439  | 1.0582 |

|              |               |                                                                                                   |           |         |         |        |
|--------------|---------------|---------------------------------------------------------------------------------------------------|-----------|---------|---------|--------|
| 1439678_at   |               |                                                                                                   | BM239869  | 7.3594  | 6.3015  | 1.0579 |
| 1437362_at   | Trmt13        | tRNA methyltransferase 13 homolog (S. cerevisiae)                                                 | BF147713  | 7.7827  | 6.7249  | 1.0577 |
| 1436872_at   | Tacc3         | transforming, acidic coiled-coil containing protein 3                                             | BB787809  | 8.1854  | 7.1278  | 1.0576 |
| 1422948_s_at |               |                                                                                                   | NM_013550 | 8.8597  | 7.8022  | 1.0574 |
| 1429356_s_at | Ggps1         | geranylgeranyl diphosphate synthase 1                                                             | AW538065  | 6.9921  | 5.9349  | 1.0572 |
| 1423682_a_at | Cdca4         | cell division cycle associated 4                                                                  | AF322238  | 10.5631 | 9.5059  | 1.0572 |
| 1448828_at   | Smc6          | structural maintenance of chromosomes 6                                                           | AV281575  | 10.2190 | 9.1621  | 1.0569 |
| 1457888_at   |               |                                                                                                   | BM238039  | 5.6402  | 4.5837  | 1.0565 |
| 1448621_a_at | Smpd1         | sphingomyelin phosphodiesterase 1, acid lysosomal                                                 | NM_011421 | 9.5164  | 8.4601  | 1.0563 |
| 1449441_a_at | Wbp1          | VW domain binding protein 1                                                                       | NM_016757 | 9.5527  | 8.4967  | 1.0561 |
| 1446226_at   | Fancb         | Fanconi anemia, complementation group B                                                           | BB201105  | 7.0149  | 5.9590  | 1.0559 |
| 1417398_at   | Ras2          | related RAS viral (r-ras) oncogene homolog 2                                                      | NM_025846 | 11.1402 | 10.0846 | 1.0555 |
| 1437395_at   | Zcchc11       | zinc finger, CCHC domain containing 11                                                            | BE370775  | 9.5413  | 8.4860  | 1.0553 |
| 1443112_at   | Api5          | apoptosis inhibitor 5                                                                             | AV364797  | 5.9119  | 4.8567  | 1.0552 |
| 1454235_a_at | Ing5          | inhibitor of growth family, member 5                                                              | AK006421  | 7.5511  | 6.4965  | 1.0546 |
| 1426575_at   | Sgms1         | sphingomyelin synthase 1                                                                          | BE629162  | 6.4409  | 5.3868  | 1.0541 |
| 1460231_at   | Irf5          | interferon regulatory factor 5                                                                    | NM_012057 | 6.6148  | 5.5610  | 1.0539 |
| 1418467_at   | Smardc3       | SWI/SNF related, matrix associated, actin dependent regulator of chromatin, subfamily d, member 3 | NM_025891 | 8.0621  | 7.0086  | 1.0535 |
| 1418092_s_at | Trip10        | thyroid hormone receptor interactor 10                                                            | NM_134125 | 10.0419 | 8.9885  | 1.0534 |
| 1428384_at   | D4Bwg0951e    | DNA segment, Chr 4, Brigham & Women's Genetics 0951 expressed                                     | AK003950  | 9.0530  | 8.0001  | 1.0528 |
| 1439020_at   |               |                                                                                                   | AW146020  | 8.0401  | 6.9873  | 1.0528 |
| 1455189_at   | Trim33        | tripartite motif-containing 33                                                                    | BB400432  | 8.4159  | 7.3636  | 1.0524 |
| 1442151_at   | D230040A04Rik | RIKEN cDNA D230040A04 gene                                                                        | BM238456  | 5.8877  | 4.8357  | 1.0520 |
| 1445669_at   | Spry4         | sprouty homolog 4 (Drosophila)                                                                    | BB080456  | 7.6393  | 6.5872  | 1.0520 |
| 1451740_at   | Paip1         | polyadenylate binding protein-interacting protein 1                                               | BC019726  | 8.7229  | 7.6715  | 1.0515 |
| 1443381_at   | Etv4          | ets variant gene 4 (E1A enhancer binding protein, E1AF)                                           | BB433247  | 6.4073  | 5.3560  | 1.0513 |
| 1442009_at   | Eif2c3        | eukaryotic translation initiation factor 2C, 3                                                    | BB357250  | 6.4952  | 5.4443  | 1.0508 |
| 1452560_a_at | Nfya          | nuclear transcription factor-Y alpha                                                              | D78642    | 9.0219  | 7.9712  | 1.0507 |
| 1424312_at   | Adipor1       | adiponectin receptor 1                                                                            | BC014875  | 7.8946  | 6.8439  | 1.0506 |
| 1421000_at   | Cnot4         | CCR4-NOT transcription complex, subunit 4                                                         | AI448404  | 8.1061  | 7.0556  | 1.0505 |
| 1437370_at   | Sgol2         | shugoshin-like 2 (S. pombe)                                                                       | AV316937  | 10.8769 | 9.8264  | 1.0505 |
| 1428418_s_at | Fam164a       | family with sequence similarity 164, member A                                                     | BE198251  | 9.5835  | 8.5332  | 1.0503 |
| 1424667_a_at | Cux1          | cut-like homeobox 1                                                                               | BC014289  | 5.2835  | 4.2333  | 1.0502 |
| 1422522_at   | Fxr2          | fragile X mental retardation, autosomal homolog 2                                                 | NM_011814 | 9.1010  | 8.0510  | 1.0500 |
| 1430904_at   | Arfgap3       | ADP-ribosylation factor GTPase activating protein 3                                               | AK018680  | 6.0047  | 4.9547  | 1.0500 |
| 1455314_at   | Lpp           | LIM domain containing preferred translocation partner in lipoma                                   | BM236111  | 9.1870  | 8.1372  | 1.0498 |
| 1454643_at   | Ubp2l         | ubiquitin associated protein 2-like                                                               | BI408204  | 9.4382  | 8.3890  | 1.0492 |
| 1442058_s_at | Psmc3ip       | proteasome (prosome, macropain) 26S subunit, ATPase 3, interacting protein                        | BE687992  | 9.6200  | 8.5710  | 1.0490 |
| 1434950_a_at | Armc8         | armadillo repeat containing 8                                                                     | BE995635  | 7.9936  | 6.9450  | 1.0487 |
| 1433441_at   | Fbxl5         | F-box and leucine-rich repeat protein 5                                                           | BQ173911  | 9.7345  | 8.6861  | 1.0484 |
| 1436994_a_at | Hist1h1c      | histone cluster 1, H1c                                                                            | BB533903  | 7.7563  | 6.7079  | 1.0484 |
| 1448080_at   |               |                                                                                                   | AI256288  | 5.1750  | 4.1267  | 1.0483 |
| 1423790_at   | Dap           | death-associated protein                                                                          | BC024876  | 11.8719 | 10.8237 | 1.0482 |
| 1419168_at   | Mapk6         | mitogen-activated protein kinase 6                                                                | BC024684  | 6.4809  | 5.4333  | 1.0476 |
| 1434422_at   | 1700066M21Rik | RIKEN cDNA 1700066M21 gene                                                                        | AV027153  | 8.3803  | 7.3328  | 1.0475 |
| 1442886_at   |               |                                                                                                   | BB667153  | 8.1270  | 7.0796  | 1.0474 |
| 1429363_at   | Vps37a        | vacuolar protein sorting 37A (yeast)                                                              | BB815335  | 8.1854  | 7.1383  | 1.0471 |
| 1455933_at   |               |                                                                                                   | AV256955  | 6.8852  | 5.8382  | 1.0470 |
| 1418818_at   | Aqp5          | aquaporin 5                                                                                       | NM_009701 | 6.6079  | 5.5610  | 1.0470 |
| 1433757_a_at | Nisch         | nischarin                                                                                         | BB025231  | 9.4250  | 8.3788  | 1.0461 |
| 1436540_at   | Mirlet7d      | microRNA let7d                                                                                    | BQ031149  | 7.6880  | 6.6421  | 1.0459 |
| 1454702_at   | 4930503L19Rik | RIKEN cDNA 4930503L19 gene                                                                        | AI450962  | 7.0534  | 6.0078  | 1.0456 |
| 1422516_a_at | Fibp          | fibroblast growth factor (acidic) intracellular binding protein                                   | NM_021438 | 8.8272  | 7.7817  | 1.0455 |

|              |               |                                                                                                         |           |         |         |        |
|--------------|---------------|---------------------------------------------------------------------------------------------------------|-----------|---------|---------|--------|
| 1427282_a_at | Fxn           | frataxin                                                                                                | AV007132  | 8.4963  | 7.4509  | 1.0455 |
| 1426553_at   | Dnajc14       | DnaJ (Hsp40) homolog, subfamily C, member 14                                                            | AK017830  | 7.9141  | 6.8688  | 1.0453 |
| 1430516_at   | 4930428B01Rik | RIKEN cDNA 4930428B01 gene                                                                              | BB167877  | 8.5007  | 7.4557  | 1.0450 |
| 1433539_at   | Commd3        | COMM domain containing 3                                                                                | BB230296  | 10.6319 | 9.5882  | 1.0437 |
| 1437549_at   | 2810408I11Rik | RIKEN cDNA 2810408I11 gene                                                                              | BB093469  | 7.6739  | 6.6308  | 1.0431 |
| 1454663_at   | Eif5          | eukaryotic translation initiation factor 5                                                              | BQ176989  | 10.3691 | 9.3261  | 1.0429 |
| 1452662_a_at | Eif2s1        | eukaryotic translation initiation factor 2, subunit 1 alpha                                             | BQ175028  | 12.1332 | 11.0907 | 1.0425 |
| 1442094_at   | Ing5          | inhibitor of growth family, member 5                                                                    | BB470038  | 6.6037  | 5.5619  | 1.0418 |
| 1434714_at   | Ero1lb        | ERO1-like beta ( <i>S. cerevisiae</i> )                                                                 | BB234316  | 8.3074  | 7.2656  | 1.0418 |
| 1431089_at   | Cpsf2         | cleavage and polyadenylation specific factor 2                                                          | BI649218  | 7.3428  | 6.3015  | 1.0413 |
| 1434524_at   | Eif2b3        | eukaryotic translation initiation factor 2B, subunit 3                                                  | AI480598  | 9.7237  | 8.6826  | 1.0412 |
| 1443832_s_at | Sdpr          | serum deprivation response                                                                              | AV064339  | 7.4140  | 6.3729  | 1.0411 |
| 1423129_at   | Shoc2         | soc-2 (suppressor of clear) homolog ( <i>C. elegans</i> )                                               | BQ032685  | 8.6048  | 7.5638  | 1.0410 |
| 1418535_at   | Rgl1          | ral guanine nucleotide dissociation stimulator, -like 1                                                 | NM_016846 | 6.2487  | 5.2081  | 1.0406 |
| 1446592_at   |               |                                                                                                         | BB466044  | 6.0063  | 4.9657  | 1.0406 |
| 1444235_at   | 1700025G04Rik | RIKEN cDNA 1700025G04 gene                                                                              | BM236039  | 6.9228  | 5.8823  | 1.0405 |
| 1421452_at   | Cdon          | cell adhesion molecule-related/down-regulated by oncogenes                                              | NM_021339 | 6.4848  | 5.4443  | 1.0404 |
| 1425248_a_at | Tyro3         | TYRO3 protein tyrosine kinase 3                                                                         | AB000828  | 7.0451  | 6.0047  | 1.0404 |
| 1438878_at   | 6430537K16Rik | RIKEN cDNA 6430537K16 gene                                                                              | AU067682  | 6.2200  | 5.1800  | 1.0400 |
| 1448851_a_at | Dnajc5        | DnaJ (Hsp40) homolog, subfamily C, member 5                                                             | AK012029  | 7.1598  | 6.1198  | 1.0400 |
| 1439088_at   | Pdzd8         | PDZ domain containing 8                                                                                 | BB102308  | 6.8186  | 5.7786  | 1.0399 |
| 1416086_at   | Tpst2         | protein-tyrosine sulfotransferase 2                                                                     | NM_009419 | 8.8720  | 7.8321  | 1.0399 |
| 1417981_at   | Insig2        | insulin induced gene 2                                                                                  | AV257512  | 9.3690  | 8.3291  | 1.0399 |
| 1428785_at   | Amotl1        | angiomin-like 1                                                                                         | BG917015  | 10.7144 | 9.6746  | 1.0399 |
| 1456479_at   | Snx30         | sorting nexin family member 30                                                                          | BB359719  | 8.4706  | 7.4308  | 1.0398 |
| 1416542_at   | Phf1          | PHD finger protein 1                                                                                    | NM_009343 | 7.3594  | 6.3197  | 1.0397 |
| 1424927_at   | Glpr1         | GLI pathogenesis-related 1 (glioma)                                                                     | BC025083  | 5.0098  | 3.9701  | 1.0397 |
| 1436240_at   | B230214O09Rik | RIKEN cDNA B230214O09 gene                                                                              | BM211445  | 9.3595  | 8.3199  | 1.0396 |
| 1443679_at   | 2510003B16Rik | RIKEN cDNA 2510003B16 gene                                                                              | AW123011  | 5.6110  | 4.5715  | 1.0396 |
| 1449474_a_at | Nelf          | nasal embryonic LHRH factor                                                                             | NM_020276 | 7.4468  | 6.4073  | 1.0395 |
| 1447917_x_at |               |                                                                                                         | BB303908  | 9.9017  | 8.8628  | 1.0389 |
| 1449738_s_at | Fam48a        | family with sequence similarity 48, member A                                                            | C80158    | 8.5895  | 7.5511  | 1.0384 |
| 1444112_at   | Gm15417       | predicted gene 15417                                                                                    | BQ174086  | 7.2546  | 6.2163  | 1.0383 |
| 1443527_at   | Terf1         | telomeric repeat binding factor 1                                                                       | BM124391  | 6.0489  | 5.0107  | 1.0382 |
| 1458582_at   | Lin54         | lin-54 homolog ( <i>C. elegans</i> )                                                                    | AV019870  | 5.7515  | 4.7134  | 1.0382 |
| 1428824_at   | 2310003C23Rik | RIKEN cDNA 2310003C23 gene                                                                              | AK009106  | 8.4010  | 7.3632  | 1.0378 |
| 1417605_s_at | Camk1         | calcium/calmodulin-dependent protein kinase I                                                           | NM_133926 | 8.5493  | 7.5118  | 1.0375 |
| 1434222_at   | Sipa111       | signal-induced proliferation-associated 1 like 1                                                        | BI153574  | 9.3573  | 8.3199  | 1.0375 |
| 1420870_at   | Mllt10        | myeloid/lymphoid or mixed-lineage leukemia (trithorax homolog, <i>Drosophila</i> ); translocated to, 10 | BB353133  | 9.4406  | 8.4032  | 1.0374 |
| 1439200_x_at |               |                                                                                                         | BE686792  | 8.3123  | 7.2750  | 1.0374 |
| 1426934_at   | Nhsl1         | NHS-like 1                                                                                              | BC013565  | 8.5807  | 7.5435  | 1.0373 |
| 1436767_at   |               |                                                                                                         | BB475271  | 9.4169  | 8.3796  | 1.0373 |
| 1434963_at   | Supt3h        | suppressor of Ty 3 homolog ( <i>S. cerevisiae</i> )                                                     | BM114601  | 8.2775  | 7.2404  | 1.0371 |
| 1458375_at   | Klhl32        | kelch-like 32 ( <i>Drosophila</i> )                                                                     | BB015113  | 5.8297  | 4.7929  | 1.0369 |
| 1428527_at   | Snx7          | sorting nexin 7                                                                                         | AK011015  | 8.8690  | 7.8321  | 1.0369 |
| 1418295_s_at | Dgat1         | diacylglycerol O-acyltransferase 1                                                                      | BC003717  | 9.0583  | 8.0217  | 1.0367 |
| 1419316_s_at | Gnb1l         | guanine nucleotide binding protein (G protein), beta polypeptide 1-like                                 | NM_023120 | 7.4930  | 6.4564  | 1.0366 |
| 1442305_at   | Gtpbp2        | GTP binding protein 2                                                                                   | AI849247  | 8.0006  | 6.9643  | 1.0363 |
| 1452242_at   | Cep55         | centrosomal protein 55                                                                                  | AK004655  | 10.7792 | 9.7429  | 1.0363 |
| 1434177_at   | Ece1          | endothelin converting enzyme 1                                                                          | AI551117  | 7.2750  | 6.2392  | 1.0358 |
| 1436583_at   | Dscc1         | defective in sister chromatid cohesion 1 homolog ( <i>S. cerevisiae</i> )                               | BB478218  | 6.5967  | 5.5610  | 1.0357 |
| 1452490_a_at | Ap2a2         | adaptor protein complex AP-2, alpha 2 subunit                                                           | BC010597  | 8.8782  | 7.8430  | 1.0351 |
| 1435777_at   | Itpr1l2       | inositol 1,4,5-triphosphate receptor interacting protein-like 2                                         | BB794845  | 10.9067 | 9.8722  | 1.0345 |
| 1430354_x_at | Scyl1         | SCY1-like 1 ( <i>S. cerevisiae</i> )                                                                    | AK019240  | 8.0602  | 7.0257  | 1.0345 |
| 1450933_at   | Pde7a         | phosphodiesterase 7A                                                                                    | BG070255  | 7.2542  | 6.2200  | 1.0342 |

|              |               |                                                                                                               |           |         |         |        |
|--------------|---------------|---------------------------------------------------------------------------------------------------------------|-----------|---------|---------|--------|
| 1425821_at   | Clcn7         | chloride channel 7                                                                                            | BC005749  | 6.3025  | 5.2685  | 1.0340 |
| 1452117_a_at | Fyb           | FYN binding protein                                                                                           | BB157866  | 6.3392  | 5.3054  | 1.0338 |
| 1418709_at   | Cox7a1        | cytochrome c oxidase, subunit VIIa 1                                                                          | AF037370  | 6.3015  | 5.2685  | 1.0330 |
| 1449702_at   | Zfand2a       | zinc finger, AN1-type domain 2A                                                                               | AU016206  | 8.7831  | 7.7503  | 1.0329 |
| 1449481_at   | Slc25a13      | solute carrier family 25 (mitochondrial carrier, adenine nucleotide translocator), member 13                  | BC016571  | 8.9409  | 7.9081  | 1.0328 |
| 1419501_at   | Polk          | polymerase (DNA directed), kappa                                                                              | BC008105  | 6.6436  | 5.6110  | 1.0326 |
| 1416813_at   | Tia1          | cytotoxic granule-associated RNA binding protein 1                                                            | BG518542  | 8.7871  | 7.7546  | 1.0325 |
| 1418763_at   | Nit2          | nitrilase family, member 2                                                                                    | BC020153  | 8.8524  | 7.8200  | 1.0324 |
| 1437128_a_at | Zfp945        | zinc finger protein 945                                                                                       | BB391874  | 8.7474  | 7.7153  | 1.0321 |
| 1447738_s_at | Ankrd13d      | ankyrin repeat domain 13 family, member D                                                                     | AI430801  | 7.3026  | 6.2707  | 1.0320 |
| 1450843_a_at | Serpinh1      | serine (or cysteine) peptidase inhibitor, clade H, member 1                                                   | BI220012  | 11.6501 | 10.6182 | 1.0319 |
| 1421117_at   | Dst           | dystonin                                                                                                      | NM_010081 | 5.8041  | 4.7725  | 1.0316 |
| 1448158_at   | Sdc1          | syndecan 1                                                                                                    | BI788645  | 6.6425  | 5.6110  | 1.0315 |
| 1446407_at   | Mysm1         | myb-like, SWIRM and MPN domains 1                                                                             | BB045598  | 5.8535  | 4.8222  | 1.0313 |
| 1447122_at   | Psm1          | proteasome (prosome, macropain) 26S subunit, non-ATPase, 1                                                    | BM218697  | 6.6125  | 5.5812  | 1.0313 |
| 1418220_at   | Foxf2         | forkhead box F2                                                                                               | NM_010225 | 5.0685  | 4.0372  | 1.0313 |
| 1439018_at   | Fhdc1         | FH2 domain containing 1                                                                                       | AV329790  | 7.8241  | 6.7928  | 1.0313 |
| 1418337_at   | Rpia          | ribose 5-phosphate isomerase A                                                                                | NM_009075 | 9.5358  | 8.5047  | 1.0311 |
| 1458996_at   | Itga5         | integrin alpha 5 (fibronectin receptor alpha)                                                                 | AI481717  | 6.6421  | 5.6110  | 1.0310 |
| 1442986_at   |               |                                                                                                               | BM118719  | 5.3765  | 4.3457  | 1.0308 |
| 1418075_at   | St6galnac4    | ST6 (alpha-N-acetyl-neuraminyl-2,3-beta-galactosyl-1,3)-N-acetylgalactosaminide alpha-2,6-sialyltransferase 4 | AK007601  | 9.1821  | 8.1514  | 1.0307 |
| 1436479_a_at | Dpp7          | dipeptidylpeptidase 7                                                                                         | BB746075  | 7.5173  | 6.4868  | 1.0305 |
| 1422507_at   | Cstb          | cystatin B                                                                                                    | NM_007793 | 12.3300 | 11.2995 | 1.0304 |
| 1449089_at   | Nrip1         | nuclear receptor interacting protein 1                                                                        | NM_008735 | 9.3388  | 8.3085  | 1.0303 |
| 1449705_x_at | Mcm3          | minichromosome maintenance deficient 3 (S. cerevisiae)                                                        | C80350    | 11.1717 | 10.1415 | 1.0303 |
| 1416918_at   | Dlg3          | discs, large homolog 3 (Drosophila)                                                                           | NM_016747 | 8.4299  | 7.3998  | 1.0301 |
| 1434270_at   |               |                                                                                                               | AV221896  | 7.2750  | 6.2450  | 1.0299 |
| 1459857_at   | Usp32         | ubiquitin specific peptidase 32                                                                               | BG071170  | 6.8076  | 5.7781  | 1.0295 |
| 1442112_at   | Vps18         | vacuolar protein sorting 18 (yeast)                                                                           | BB069506  | 5.4891  | 4.4597  | 1.0295 |
| 1429469_at   | A930013F10Rik | RIKEN cDNA A930013F10 gene                                                                                    | BB496937  | 6.0989  | 5.0697  | 1.0293 |
| 1441465_at   | Cnot3         | CCR4-NOT transcription complex, subunit 3                                                                     | BB046752  | 6.6941  | 5.6650  | 1.0291 |
| 1424486_a_at | Txnrd1        | thioredoxin reductase 1                                                                                       | BB284199  | 7.7042  | 6.6753  | 1.0289 |
| 1435472_at   | Kremen1       | kringle containing transmembrane protein 1                                                                    | BG069617  | 7.0920  | 6.0634  | 1.0286 |
| 1457708_at   | Mbd4          | methyl-CpG binding domain protein 4                                                                           | BB753827  | 7.4419  | 6.4135  | 1.0284 |
| 1442235_at   | Plagl2        | pleiomorphic adenoma gene-like 2                                                                              | BF584971  | 6.3536  | 5.3252  | 1.0284 |
| 1451457_at   | Sc5d          | sterol-C5-desaturase (fungal ERG3, delta-5-desaturase) homolog (S. cerevisiae)                                | AB016248  | 10.2594 | 9.2310  | 1.0284 |
| 1423557_at   | Ifngr2        | interferon gamma receptor 2                                                                                   | BF537076  | 7.4523  | 6.4242  | 1.0282 |
| 1417297_at   | Itpr3         | inositol 1,4,5-triphosphate receptor 3                                                                        | NM_080553 | 9.5897  | 8.5618  | 1.0280 |
| 1438887_a_at | Gmcl1         | germ cell-less homolog 1 (Drosophila)                                                                         | BM239632  | 6.0489  | 5.0212  | 1.0277 |
| 1425649_at   | Slc39a14      | solute carrier family 39 (zinc transporter), member 14                                                        | BC021530  | 6.4462  | 5.4185  | 1.0277 |
| 1453372_at   | Dnajc1        | DnaJ (Hsp40) homolog, subfamily C, member 1                                                                   | AK014639  | 6.5170  | 5.4893  | 1.0277 |
| 1433504_at   | Pygb          | brain glycogen phosphorylase                                                                                  | AW547988  | 9.9962  | 8.9690  | 1.0272 |
| 1448706_at   | Tdp2          | tyrosyl-DNA phosphodiesterase 2                                                                               | NM_019551 | 10.4780 | 9.4512  | 1.0268 |
| 1428753_a_at | Dgcr6         | DiGeorge syndrome critical region gene 6                                                                      | AK019346  | 9.3551  | 8.3289  | 1.0262 |
| 1417926_at   | Ncapg2        | non-SMC condensin II complex, subunit G2                                                                      | NM_133762 | 10.8788 | 9.8531  | 1.0257 |
| 1423306_at   | 2010002N04Rik | RIKEN cDNA 2010002N04 gene                                                                                    | BI963682  | 8.3759  | 7.3506  | 1.0254 |
| 1424150_at   | Gdpd5         | glycerophosphodiester phosphodiesterase domain containing 5                                                   | BC024955  | 8.0237  | 6.9986  | 1.0252 |
| 1434062_at   | Rabgap1l      | RAB GTPase activating protein 1-like                                                                          | AV226672  | 7.8563  | 6.8313  | 1.0250 |
| 1450461_at   | Tcf7          | transcription factor 7, T cell specific                                                                       | NM_009331 | 6.6060  | 5.5812  | 1.0248 |
| 1424834_s_at | Itpr2         | inositol 1,4,5-triphosphate receptor 2                                                                        | BC013815  | 5.6374  | 4.6127  | 1.0246 |
| 1449358_at   | D6Mm5e        | DNA segment, Chr 6, Miriam Meisler 5, expressed                                                               | NM_033079 | 5.3831  | 4.3588  | 1.0244 |
| 1421110_at   | Mtdh          | metadherin                                                                                                    | NM_026002 | 5.0107  | 3.9870  | 1.0237 |
| 1452154_at   | lars          | isoleucine-tRNA synthetase                                                                                    | BE915338  | 10.4067 | 9.3833  | 1.0234 |
| 1460688_s_at | Unc119b       | unc-119 homolog B (C. elegans)                                                                                | BB390422  | 9.5897  | 8.5667  | 1.0231 |
| 1417161_at   | Cdk2ap2       | CDK2-associated protein 2                                                                                     | NM_026373 | 9.9880  | 8.9650  | 1.0230 |



|              |               |                                                                   |           |         |         |        |
|--------------|---------------|-------------------------------------------------------------------|-----------|---------|---------|--------|
| 1427418_a_at | Hif1a         | hypoxia inducible factor 1, alpha subunit                         | X95580    | 11.1493 | 10.1263 | 1.0230 |
| 1439695_a_at | Kif20b        | kinesin family member 20B                                         | BB200034  | 10.0477 | 9.0248  | 1.0229 |
| 1418249_at   | Crcp          | calcitonin gene-related peptide-receptor component protein        | NM_007761 | 9.2816  | 8.2587  | 1.0228 |
| 1455254_at   | 4833420G11Rik | RIKEN cDNA 4833420G11 gene                                        | AV250006  | 8.1235  | 7.1007  | 1.0227 |
| 1452009_at   | Ttc39b        | tetratricopeptide repeat domain 39B                               | AK018685  | 8.1809  | 7.1586  | 1.0223 |
| 1427893_a_at | Pmvk          | phosphomevalonate kinase                                          | BI713896  | 9.5292  | 8.5073  | 1.0219 |
| 1437480_at   | Ska2          | spindle and kinetochore associated complex subunit 2              | BB071833  | 9.6781  | 8.6563  | 1.0218 |
| 1424724_a_at | D16Erd472e    | DNA segment, Chr 16, ERATO Doi 472, expressed                     | BC019957  | 7.2809  | 6.2593  | 1.0215 |
| 1416165_at   | Rab31         | RAB31, member RAS oncogene family                                 | NM_133685 | 10.1752 | 9.1542  | 1.0210 |
| 1450724_at   | Fam126a       | family with sequence similarity 126, member A                     | NM_053090 | 9.7099  | 8.6896  | 1.0203 |
| 1447965_at   | C80012        | expressed sequence C80012                                         | BG066596  | 6.5404  | 5.5208  | 1.0196 |
| 1418071_s_at | Cdyl          | chromodomain protein, Y chromosome-like                           | AF081260  | 9.3337  | 8.3146  | 1.0192 |
| 1434924_at   | Phf2          | PHD finger protein 2                                              | BF468039  | 8.8762  | 7.8572  | 1.0190 |
| 1457233_at   | Dnaja2        | DnaJ (Hsp40) homolog, subfamily A, member 2                       | BB324466  | 7.9258  | 6.9069  | 1.0188 |
| 1422157_a_at | Itgb1bp1      | integrin beta 1 binding protein 1                                 | NM_008403 | 9.6454  | 8.6268  | 1.0187 |
| 1434750_at   | Exoc3         | exocyst complex component 3                                       | BE200383  | 9.4468  | 8.4282  | 1.0187 |
| 1455114_at   | Ccno          | cyclin O                                                          | BB547482  | 6.1433  | 5.1247  | 1.0186 |
| 1442415_at   | 5830454E08Rik | RIKEN cDNA 5830454E08 gene                                        | BQ180241  | 6.2005  | 5.1819  | 1.0186 |
| 1450878_at   | Sri           | sorcin                                                            | AK008404  | 10.7886 | 9.7702  | 1.0184 |
| 1426739_at   | Donson        | downstream neighbor of SON                                        | BQ174742  | 8.9548  | 7.9367  | 1.0182 |
| 1453107_s_at |               |                                                                   | AK008037  | 9.9267  | 8.9086  | 1.0181 |
| 1452406_x_at | Erdr1         | erythroid differentiation regulator 1                             | AJ007909  | 11.3519 | 10.3338 | 1.0181 |
| 1424711_at   | Tmem2         | transmembrane protein 2                                           | BC019745  | 8.5270  | 7.5093  | 1.0177 |
| 1429600_at   | Mthfd2l       | methylenetetrahydrofolate dehydrogenase (NADP+ dependent) 2-like  | AK003824  | 7.6739  | 6.6564  | 1.0175 |
| 1429971_at   | Txnrd2        | thioredoxin reductase 2                                           | BE948556  | 5.9831  | 4.9657  | 1.0174 |
| 1460598_at   | Il28ra        | interleukin 28 receptor alpha                                     | AW212870  | 5.2385  | 4.2211  | 1.0173 |
| 1435436_at   | Epas1         | endothelial PAS domain protein 1                                  | BI647951  | 5.8400  | 4.8229  | 1.0171 |
| 1432367_a_at | Ufd1l         | ubiquitin fusion degradation 1 like                               | AK012543  | 8.9931  | 7.9765  | 1.0165 |
| 1437822_at   | Yme1l1        | YME1-like 1 (S. cerevisiae)                                       | AV340292  | 5.5729  | 4.5566  | 1.0163 |
| 1439166_at   | Nol11         | nucleolar protein 11                                              | AV321894  | 6.0270  | 5.0107  | 1.0163 |
| 1459670_at   |               |                                                                   | AI503931  | 5.1851  | 4.1689  | 1.0162 |
| 1426223_at   | Ttc39c        | tetratricopeptide repeat domain 39C                               | BC020021  | 8.7501  | 7.7342  | 1.0159 |
| 1426831_at   | Ahcy1l        | S-adenosylhomocysteine hydrolase-like 1                           | BB831090  | 10.4328 | 9.4170  | 1.0157 |
| 1451385_at   | Fam162a       | family with sequence similarity 162, member A                     | BC010826  | 11.8451 | 10.8298 | 1.0153 |
| 1426528_at   | Nrp2          | neuropilin 2                                                      | BQ176723  | 8.5086  | 7.4935  | 1.0151 |
| 1450262_at   | Clcf1         | cardiotrophin-like cytokine factor 1                              | NM_019952 | 6.7665  | 5.7515  | 1.0150 |
| 1437068_at   | Cenpk         | centromere protein K                                              | BM213268  | 6.2831  | 5.2685  | 1.0146 |
| 1417382_at   | Entpd5        | ectonucleoside triphosphate diphosphohydrolase 5                  | NM_007647 | 6.8186  | 5.8041  | 1.0145 |
| 1452348_s_at |               |                                                                   | AI481797  | 9.9603  | 8.9461  | 1.0143 |
| 1423471_at   | Ptbp2         | polypyrimidine tract binding protein 2                            | BB076855  | 6.3554  | 5.3414  | 1.0140 |
| 1451778_at   | Crtc3         | CREB regulated transcription coactivator 3                        | BC011210  | 6.9835  | 5.9703  | 1.0131 |
| 1430171_at   | Fibp          | fibroblast growth factor (acidic) intracellular binding protein   | AK008093  | 6.4574  | 5.4443  | 1.0130 |
| 1457181_at   | Desi1         | desumoylating isopeptidase 1                                      | BB032242  | 6.9132  | 5.9004  | 1.0128 |
| 1436105_at   | Ccdc74a       | coiled-coil domain containing 74A                                 | BG068839  | 6.0234  | 5.0107  | 1.0127 |
| 1452598_at   | Gins1         | GINS complex subunit 1 (Psf1 homolog)                             | AK013116  | 9.9132  | 8.9005  | 1.0127 |
| 1455665_at   | Lonrf1        | LON peptidase N-terminal domain and ring finger 1                 | BB705689  | 9.5856  | 8.5732  | 1.0125 |
| 1458414_at   | D2Erd93e      | DNA segment, Chr 2, ERATO Doi 93, expressed                       | BE952347  | 6.0352  | 5.0230  | 1.0123 |
| 1424784_at   |               |                                                                   | AV047635  | 5.4108  | 4.3991  | 1.0117 |
| 1419635_at   | 4833420G17Rik | RIKEN cDNA 4833420G17 gene                                        | BG067119  | 8.4030  | 7.3912  | 1.0117 |
| 1427692_a_at | Cask          | calcium/calmodulin-dependent serine protein kinase (MAGUK family) | Y17137    | 6.6801  | 5.6689  | 1.0112 |
| 1430244_at   | 4921509J17Rik | RIKEN cDNA 4921509J17 gene                                        | BB084986  | 5.0544  | 4.0433  | 1.0112 |
| 1436196_at   | C030046G05    | uncharacterized protein C030046G05                                | BE691546  | 7.4183  | 6.4073  | 1.0110 |
| 1456991_at   |               |                                                                   | BM237837  | 5.4098  | 4.3996  | 1.0101 |
| 1424040_at   | Mtap7d1       | microtubule-associated protein 7 domain containing 1              | BC019977  | 10.2337 | 9.2237  | 1.0100 |
| 1435768_at   | Arid4b        | AT rich interactive domain 4B (RBP1-like)                         | AV371758  | 9.2365  | 8.2265  | 1.0100 |
| 1454978_at   | Ttyh3         | tweety homolog 3 (Drosophila)                                     | BQ180649  | 7.4502  | 6.4404  | 1.0098 |

|              |               |                                                                                       |           |         |         |         |
|--------------|---------------|---------------------------------------------------------------------------------------|-----------|---------|---------|---------|
| 1443827_x_at | Fam20c        | family with sequence similarity 20, member C                                          | BB375974  | 5.3684  | 4.3588  | 1.0097  |
| 1458664_at   | A430103D13Rik | RIKEN cDNA A430103D13 gene                                                            | BB750424  | 5.1786  | 4.1689  | 1.0097  |
| 1456733_x_at | Serpinh1      | serine (or cysteine) peptidase inhibitor, clade H, member 1                           | BB329489  | 11.5970 | 10.5875 | 1.0095  |
| 1443346_at   |               |                                                                                       | BB167125  | 5.5055  | 4.4968  | 1.0087  |
| 1451797_at   | Smg5          | Smg-5 homolog, nonsense mediated mRNA decay factor (C. elegans)                       | BC024683  | 6.7769  | 5.7684  | 1.0085  |
| 1426977_at   | Usp47         | ubiquitin specific peptidase 47                                                       | BG069271  | 10.2889 | 9.2805  | 1.0084  |
| 1460678_at   | Klhdc2        | kelch domain containing 2                                                             | BC005581  | 10.3846 | 9.3769  | 1.0077  |
| 1455990_at   | Kif23         | kinesin family member 23                                                              | AW986176  | 10.7843 | 9.7773  | 1.0070  |
| 1452581_at   | Rprd1b        | regulation of nuclear pre-mRNA domain containing 1B                                   | BB304715  | 7.2652  | 6.2582  | 1.0070  |
| 1456614_at   | Acn9          | ACN9 homolog (S. cerevisiae)                                                          | BF122715  | 8.3664  | 7.3594  | 1.0070  |
| 1454701_at   | 4930503L19Rik | RIKEN cDNA 4930503L19 gene                                                            | AI450962  | 7.9263  | 6.9195  | 1.0068  |
| 1457150_at   | AI428301      | expressed sequence AI428301                                                           | BE983392  | 7.9936  | 6.9873  | 1.0064  |
| 1451230_a_at | Wbp5          | WW domain binding protein 5                                                           | BC007478  | 12.9735 | 11.9672 | 1.0063  |
| 1443158_at   |               |                                                                                       | BB035643  | 5.7781  | 4.7725  | 1.0056  |
| 1419440_at   | Trim54        | tripartite motif-containing 54                                                        | NM_021447 | 5.4648  | 4.4597  | 1.0051  |
| 1417825_at   | Esd           | esterase D/formylglutathione hydrolase                                                | NM_016903 | 13.3628 | 12.3581 | 1.0047  |
| 1427718_a_at | Mdm2          | transformed mouse 3T3 cell double minute 2                                            | X58876    | 8.4652  | 7.4607  | 1.0045  |
| 1417352_s_at | Snrpa1        | small nuclear ribonucleoprotein polypeptide A'                                        | BC013777  | 10.9850 | 9.9809  | 1.0040  |
| 1420197_at   | Gadd45b       | growth arrest and DNA-damage-inducible 45 beta                                        | AI323528  | 5.7245  | 4.7207  | 1.0038  |
| 1434153_at   | Shb           | src homology 2 domain-containing transforming protein B                               | BI408715  | 7.9021  | 6.8985  | 1.0037  |
| 1440402_at   | 4831426I19Rik | RIKEN cDNA 4831426I19 gene                                                            | BB025606  | 8.0672  | 7.0639  | 1.0033  |
| 1455300_at   | Tet2          | tet methylcytosine dioxygenase 2                                                      | AV381006  | 8.1474  | 7.1442  | 1.0031  |
| 1436067_at   | Zbtb10        | zinc finger and BTB domain containing 10                                              | BG068032  | 7.7740  | 6.7709  | 1.0030  |
| 1444257_at   | Prr11         | proline rich 11                                                                       | BB208466  | 7.7740  | 6.7709  | 1.0030  |
| 1422535_at   | Ccne2         | cyclin E2                                                                             | AF091432  | 9.3668  | 8.3642  | 1.0026  |
| 1417470_at   | Apobec3       | apolipoprotein B mRNA editing enzyme, catalytic polypeptide 3                         | NM_030255 | 8.8177  | 7.8151  | 1.0025  |
| 1452344_at   | Synj2         | synaptojanin 2                                                                        | BE944213  | 8.1710  | 7.1687  | 1.0023  |
| 1457293_at   | Zbtb4         | zinc finger and BTB domain containing 4                                               | BF714580  | 6.4791  | 5.4771  | 1.0020  |
| 1438974_x_at | Pitpnm1       | phosphatidylinositol transfer protein, membrane-associated 1                          | BB207105  | 6.0562  | 5.0544  | 1.0018  |
| 1418170_a_at | Zcchc14       | zinc finger, CCHC domain containing 14                                                | BB223737  | 8.5715  | 7.5698  | 1.0017  |
| 1443229_at   | Atad2         | ATPase family, AAA domain containing 2                                                | AV319821  | 5.4118  | 4.4103  | 1.0015  |
| 1441295_at   | Lman2l        | lectin, mannose-binding 2-like                                                        | BB712151  | 7.2842  | 6.2831  | 1.0012  |
| 1453140_at   | Zfp871        | zinc finger protein 871                                                               | AK018550  | 9.5050  | 8.5047  | 1.0004  |
| 1449061_a_at | Prim1         | DNA primase, p49 subunit                                                              | J04620    | 10.3576 | 9.3573  | 1.0003  |
| 1450935_at   | Erc5          | excision repair cross-complementing rodent repair deficiency, complementation group 5 | BM198879  | 8.8172  | 7.8172  | 1.0000  |
| 1428003_s_at | Thtpa         | thiamine triphosphatase                                                               | BI082282  | 6.1275  | 7.1280  | -1.0005 |
| 1455880_s_at | Becn1         | beclin 1, autophagy related                                                           | C86082    | 10.2627 | 11.2637 | -1.0010 |
| 1431929_a_at | Stx17         | syntaxin 17                                                                           | AK014718  | 6.2549  | 7.2562  | -1.0013 |
| 1455421_x_at | Fam131b       | family with sequence similarity 131, member B                                         | AW490145  | 4.4430  | 5.4443  | -1.0013 |
| 1423843_at   | Lrrc61        | leucine rich repeat containing 61                                                     | BC027309  | 5.4064  | 6.4079  | -1.0015 |
| 1423473_at   | 2-Sep         | septin 2                                                                              | AV304911  | 4.6387  | 5.6402  | -1.0016 |
| 1428090_at   | Ptcd3         | pentatricopeptide repeat domain 3                                                     | AK013131  | 9.6220  | 10.6238 | -1.0017 |
| 1452963_at   | 9530077C05Rik | RIKEN cDNA 9530077C05 gene                                                            | AK003384  | 5.1383  | 6.1404  | -1.0021 |
| 1417243_at   | Fam192a       | family with sequence similarity 192, member A                                         | NM_028221 | 9.1895  | 10.1918 | -1.0022 |
| 1418039_at   | Rab13         | RAB, member of RAS oncogene family-like 3                                             | NM_026297 | 7.6757  | 8.6780  | -1.0023 |
| 1426541_a_at | Endod1        | endonuclease domain containing 1                                                      | BF168366  | 4.4746  | 5.4771  | -1.0025 |
| 1424650_at   | Pdia5         | protein disulfide isomerase associated 5                                              | BC009151  | 8.4809  | 9.4836  | -1.0027 |
| 1436353_at   | A230046K03Rik | RIKEN cDNA A230046K03 gene                                                            | AU018634  | 8.3701  | 9.3728  | -1.0027 |
| 1436082_at   |               |                                                                                       | BE992058  | 5.8877  | 6.8912  | -1.0034 |
| 1435913_at   | B4galnt4      | beta-1,4-N-acetyl-galactosaminyl transferase 4                                        | AW909327  | 6.6631  | 7.6668  | -1.0037 |
| 1434041_at   | Appbp2        | amyloid beta precursor protein (cytoplasmic tail) binding protein 2                   | BB553604  | 6.6888  | 7.6926  | -1.0038 |
| 1436962_at   | Prdm6         | PR domain containing 6                                                                | AV303905  | 5.7351  | 6.7391  | -1.0040 |
| 1449576_at   | Eif1ax        | eukaryotic translation initiation factor 1A, X-linked                                 | NM_025437 | 8.2986  | 9.3027  | -1.0041 |
| 1438307_at   | Hmgb2         | high mobility group box 2                                                             | AV317732  | 6.4126  | 7.4168  | -1.0042 |
| 1434880_at   | Etv6          | ets variant gene 6 (TEL oncogene)                                                     | BB667430  | 8.7520  | 9.7563  | -1.0044 |
| 1419410_at   | Batf          | basic leucine zipper transcription factor, ATF-                                       | NM_016767 | 6.1807  | 7.1853  | -1.0045 |

|              |               |                                                                        |           |         |         |         |
|--------------|---------------|------------------------------------------------------------------------|-----------|---------|---------|---------|
| 1429773_at   | Dnajc22       | DnaJ (Hsp40) homolog, subfamily C, member 22                           | BB667713  | 6.5772  | 7.5823  | -1.0052 |
| 1434958_at   | Sacs          | sacsin                                                                 | BG075163  | 7.3806  | 8.3860  | -1.0054 |
| 1452814_at   | Cpne3         | copine III                                                             | BM213277  | 9.7842  | 10.7897 | -1.0055 |
| 1455860_at   | Pigh          | phosphatidylinositol glycan anchor biosynthesis, class H               | BB732183  | 5.8632  | 6.8688  | -1.0057 |
| 1438181_x_at | Tm2d2         | TM2 domain containing 2                                                | BB302809  | 7.9929  | 8.9987  | -1.0058 |
| 1456063_at   | Fam120c       | family with sequence similarity 120C                                   | BM237456  | 6.3180  | 7.3238  | -1.0058 |
| 1435187_at   | Tomm20        | translocase of outer mitochondrial membrane 20 homolog (yeast)         | BG064946  | 8.0883  | 9.0942  | -1.0060 |
| 1422677_at   | Dgat2         | diacylglycerol O-acyltransferase 2                                     | AK002443  | 6.4952  | 7.5015  | -1.0063 |
| 1436045_at   | Tsga10        | testis specific 10                                                     | AV377349  | 5.5812  | 6.5881  | -1.0069 |
| 1424014_at   | 2900092E17Rik | RIKEN cDNA 2900092E17 gene                                             | BC003932  | 7.4935  | 8.5007  | -1.0072 |
| 1432211_a_at | Fbxo9         | f-box protein 9                                                        | AK018482  | 6.7341  | 7.7414  | -1.0073 |
| 1455288_at   | Leprel4       | leprecan-like 4                                                        | BE951265  | 8.8254  | 9.8332  | -1.0078 |
| 1455081_at   | Txnl4b        | thioredoxin-like 4B                                                    | BB492199  | 6.6054  | 7.6138  | -1.0084 |
| 1450767_at   | Nedd9         | neural precursor cell expressed, developmentally down-regulated gene 9 | NM_017464 | 6.2438  | 7.2523  | -1.0086 |
| 1419807_at   | D4ErtD335e    | DNA segment, Chr 4, ERATO Doi 335, expressed                           | C80868    | 4.2966  | 5.3054  | -1.0088 |
| 1451981_at   | Gm16517       | predicted gene, Gm16517                                                | AF303106  | 6.9092  | 7.9181  | -1.0089 |
| 1426089_a_at | BC003331      | cDNA sequence BC003331                                                 | BC003331  | 8.0385  | 9.0477  | -1.0092 |
| 1447899_x_at | Epcam         | epithelial cell adhesion molecule                                      | AV099587  | 5.9119  | 6.9213  | -1.0095 |
| 1423621_a_at | Slc33a1       | solute carrier family 33 (acetyl-CoA transporter), member 1            | BM235996  | 8.2505  | 9.2600  | -1.0096 |
| 1433658_x_at | Pcbp4         | poly(rC) binding protein 4                                             | AV300794  | 9.8481  | 10.8576 | -1.0096 |
| 1426244_at   | Mapre2        | microtubule-associated protein, RP/EB family, member 2                 | BC027056  | 5.6704  | 6.6801  | -1.0097 |
| 1429259_a_at |               |                                                                        | AW985991  | 9.1244  | 10.1343 | -1.0099 |
| 1451273_x_at | Ftsjd1        | FtsJ methyltransferase domain containing 1                             | BC025546  | 6.7283  | 7.7384  | -1.0100 |
| 1429415_at   | Zmynd8        | zinc finger, MYND-type containing 8                                    | AK014397  | 6.6275  | 7.6378  | -1.0103 |
| 1450690_at   | Ranbp2        | RAN binding protein 2                                                  | BM507707  | 9.0410  | 10.0515 | -1.0104 |
| 1422264_s_at | Klf9          | Kruppel-like factor 9                                                  | NM_010638 | 5.6689  | 6.6801  | -1.0112 |
| 1452973_at   | Ppm1k         | protein phosphatase 1K (PP2C domain containing)                        | AK013741  | 7.4001  | 8.4117  | -1.0116 |
| 1426574_a_at | Add3          | adducin 3 (gamma)                                                      | BI410363  | 7.5015  | 8.5139  | -1.0124 |
| 1434120_a_at | Metap2        | methionine aminopeptidase 2                                            | AW742814  | 10.9867 | 11.9994 | -1.0127 |
| 1431510_s_at | Cmc1          | COX assembly mitochondrial protein homolog (S. cerevisiae)             | AK008567  | 8.9461  | 9.9589  | -1.0128 |
| 1419978_s_at | Arhgef25      | Rho guanine nucleotide exchange factor (GEF) 25                        | AU014694  | 8.4860  | 9.4989  | -1.0129 |
| 1415731_at   | Angel2        | angel homolog 2 (Drosophila)                                           | W08638    | 6.9025  | 7.9154  | -1.0130 |
| 1423677_at   | Fkbp9         | FK506 binding protein 9                                                | AF279263  | 10.8185 | 11.8322 | -1.0137 |
| 1436596_at   | H2afv         | H2A histone family, member V                                           | BG092470  | 7.1994  | 8.2131  | -1.0138 |
| 1431372_at   | Srpk2         | serine/arginine-rich protein specific kinase 2                         | AK014004  | 5.5130  | 6.5268  | -1.0139 |
| 1434308_at   | Slc43a2       | solute carrier family 43, member 2                                     | AU016853  | 5.8549  | 6.8688  | -1.0139 |
| 1415996_at   | Txnip         | thioredoxin interacting protein                                        | AF173681  | 9.3269  | 10.3408 | -1.0139 |
| 1418181_at   | Ptp4a3        | protein tyrosine phosphatase 4a3                                       | AK014601  | 5.3414  | 6.3554  | -1.0140 |
| 1430701_a_at | 5730528L13Rik | RIKEN cDNA 5730528L13 gene                                             | AK017795  | 7.7713  | 8.7853  | -1.0140 |
| 1424850_at   | Map3k1        | mitogen-activated protein kinase kinase kinase 1                       | L13103    | 5.3054  | 6.3197  | -1.0143 |
| 1438352_at   | Mapre2        | microtubule-associated protein, RP/EB family, member 2                 | BM217851  | 4.4301  | 5.4443  | -1.0143 |
| 1417134_at   | Srpk2         | serine/arginine-rich protein specific kinase 2                         | NM_009274 | 8.7678  | 9.7828  | -1.0150 |
| 1437161_x_at | Rbpms         | RNA binding protein gene with multiple splicing                        | BG069460  | 3.9953  | 5.0107  | -1.0154 |
| 1435244_at   | Vav2          | vav 2 oncogene                                                         | BF535947  | 6.3084  | 7.3238  | -1.0154 |
| 1451511_at   | Hibch         | 3-hydroxyisobutyryl-Coenzyme A hydrolase                               | BC026437  | 5.6110  | 6.6265  | -1.0155 |
| 1450879_at   | Atp9b         | ATPase, class II, type 9B                                              | BB667482  | 7.4072  | 8.4231  | -1.0160 |
| 1439405_x_at | Cntd1         | cyclin N-terminal domain containing 1                                  | AV296285  | 11.4447 | 12.4608 | -1.0161 |
| 1448871_at   | Mapk13        | mitogen-activated protein kinase 13                                    | NM_011950 | 5.0107  | 6.0270  | -1.0163 |
| 1439234_a_at | Tm2d2         | TM2 domain containing 2                                                | BE200117  | 6.8685  | 7.8849  | -1.0164 |
| 1457791_at   | B830008H07Rik | RIKEN cDNA B830008H07 gene                                             | BB333194  | 5.9896  | 7.0061  | -1.0165 |
| 1422743_at   | Phka1         | phosphorylase kinase alpha 1                                           | NM_008832 | 6.5268  | 7.5434  | -1.0165 |
| 1434761_at   | Lrrtm3        | leucine rich repeat transmembrane neuronal 3                           | BM224801  | 4.1035  | 5.1203  | -1.0169 |
| 1422697_s_at | Jarid2        | jumonji, AT rich interactive domain 2                                  | NM_021878 | 6.9190  | 7.9359  | -1.0169 |
| 1436444_at   | 6030405A18Rik | RIKEN cDNA 6030405A18 gene                                             | AV319257  | 4.0372  | 5.0544  | -1.0173 |

|              |               |                                                            |           |        |         |         |
|--------------|---------------|------------------------------------------------------------|-----------|--------|---------|---------|
| 1449189_at   | BC003266      | cDNA sequence BC003266                                     | NM_030252 | 7.4938 | 8.5113  | -1.0174 |
| 1440563_at   |               |                                                            | BB522905  | 4.5433 | 5.5610  | -1.0176 |
| 1449125_at   | Tnfaip8l1     | tumor necrosis factor, alpha-induced protein 8-like 1      | NM_025566 | 7.6470 | 8.6649  | -1.0179 |
| 1433899_x_at | Tsc22d1       | TSC22 domain family, member 1                              | AU016382  | 9.8552 | 10.8736 | -1.0184 |
| 1452099_at   | Diexf         | digestive organ expansion factor homolog (zebrafish)       | BG070043  | 7.2436 | 8.2620  | -1.0185 |
| 1453381_at   | Rsf1          | remodeling and spacing factor 1                            | BB771017  | 5.9676 | 6.9873  | -1.0196 |
| 1429376_s_at | Anapc10       | anaphase promoting complex subunit 10                      | BF322051  | 9.0431 | 10.0628 | -1.0196 |
| 1431932_s_at | Trim44        | tripartite motif-containing 44                             | AK015519  | 5.7245 | 6.7443  | -1.0198 |
| 1451433_at   | Mfsd3         | major facilitator superfamily domain containing 3          | BC019171  | 6.3219 | 7.3417  | -1.0198 |
| 1451890_at   | Kif13a        | kinesin family member 13A                                  | AB037923  | 6.1380 | 7.1586  | -1.0206 |
| 1452191_at   | Prcp          | prolylcarboxypeptidase (angiotensinase C)                  | AK011112  | 6.7874 | 7.8087  | -1.0213 |
| 1424241_at   | Slc30a6       | solute carrier family 30 (zinc transporter), member 6      | AF233346  | 8.2506 | 9.2719  | -1.0213 |
| 1455034_at   | Nr4a2         | nuclear receptor subfamily 4, group A, member 2            | BB703394  | 6.3554 | 7.3768  | -1.0215 |
| 1418424_at   | Tnfaip6       | tumor necrosis factor alpha induced protein 6              | NM_009398 | 6.3021 | 7.3238  | -1.0217 |
| 1460450_at   | Ammecr1l      | AMME chromosomal region gene 1-like                        | AK017359  | 8.2218 | 9.2437  | -1.0219 |
| 1450765_a_at | Pde6h         | phosphodiesterase 6H, cGMP-specific, cone, gamma           | NM_023898 | 4.6674 | 5.6893  | -1.0219 |
| 1441340_at   | Cep68         | centrosomal protein 68                                     | BF018298  | 5.9230 | 6.9450  | -1.0219 |
| 1441988_at   | Ppm1k         | protein phosphatase 1K (PP2C domain containing)            | AI482429  | 6.4791 | 7.5015  | -1.0224 |
| 1441487_at   | Trim2         | tripartite motif-containing 2                              | BB197646  | 4.1689 | 5.1918  | -1.0229 |
| 1434143_at   | Atmin         | ATM interactor                                             | BQ266886  | 6.5881 | 7.6114  | -1.0233 |
| 1424086_at   | Oaf           | OAF homolog (Drosophila)                                   | BC025514  | 9.2198 | 10.2438 | -1.0240 |
| 1451422_at   | Myo18a        | myosin XVIIIa                                              | AB026497  | 8.9807 | 10.0050 | -1.0242 |
| 1418028_at   | Dct           | dopachrome tautomerase                                     | NM_010024 | 4.6999 | 5.7245  | -1.0246 |
| 1431829_a_at | Rgl3          | ral guanine nucleotide dissociation stimulator-like 3      | AK004876  | 5.9378 | 6.9636  | -1.0258 |
| 1435931_at   |               |                                                            | BM937727  | 5.6488 | 6.6748  | -1.0260 |
| 1425580_a_at | Pik3c3        | phosphoinositide-3-kinase, class 3                         | BC024675  | 7.5278 | 8.5541  | -1.0263 |
| 1426909_at   | Uck2          | uridine-cytidine kinase 2                                  | BC004016  | 7.6597 | 8.6861  | -1.0264 |
| 1430769_s_at | Fam122a       | family with sequence similarity 122, member A              | AW911794  | 6.9094 | 7.9359  | -1.0265 |
| 1423495_at   | Decr2         | 2-4-dienoyl-Coenzyme A reductase 2, peroxisomal            | BE952632  | 6.3729 | 7.3998  | -1.0269 |
| 1429247_at   | Anxa6         | annexin A6                                                 | AK013026  | 4.8844 | 5.9119  | -1.0275 |
| 1420295_x_at | Clcn5         | chloride channel 5                                         | T25545    | 9.9506 | 10.9784 | -1.0278 |
| 1454648_s_at | D10Wsu102e    | DNA segment, Chr 10, Wayne State University 102, expressed | AV025581  | 8.3123 | 9.3410  | -1.0287 |
| 1454079_at   | 4933400F03Rik | RIKEN cDNA 4933400F03 gene                                 | AK016591  | 4.7529 | 5.7820  | -1.0291 |
| 1417167_at   | Exosc5        | exosome component 5                                        | NM_138586 | 7.9081 | 8.9373  | -1.0291 |
| 1434149_at   | Tcf4          | transcription factor 4                                     | BB364520  | 8.8430 | 9.8722  | -1.0292 |
| 1428392_at   | Rassf2        | Ras association (RalGDS/AF-6) domain family member 2       | AK018504  | 5.4443 | 6.4737  | -1.0294 |
| 1429961_at   | 1700021C14Rik | RIKEN cDNA 1700021C14 gene                                 | AK006195  | 5.2685 | 6.2979  | -1.0294 |
| 1460735_at   | Svil          | supervillin                                                | BM203457  | 8.4435 | 9.4732  | -1.0297 |
| 1451908_a_at | Sec14l1       | SEC14-like 1 (S. cerevisiae)                               | BC005766  | 5.4771 | 6.5068  | -1.0297 |
| 1417896_at   | Tjp3          | tight junction protein 3                                   | NM_013769 | 4.4167 | 5.4470  | -1.0303 |
| 1435006_s_at | Abcb7         | ATP-binding cassette, sub-family B (MDR/TAP), member 7     | BM119407  | 8.9964 | 10.0270 | -1.0305 |
| 1450524_at   | Cldn9         | claudin 9                                                  | NM_020293 | 5.0893 | 6.1198  | -1.0305 |
| 1417813_at   | Ikake         | inhibitor of kappaB kinase epsilon                         | NM_019777 | 5.8903 | 6.9213  | -1.0310 |
| 1455208_at   | Pex19         | peroxisomal biogenesis factor 19                           | AV229364  | 5.5033 | 6.5346  | -1.0313 |
| 1427940_s_at | Mycbp         | c-myc binding protein                                      | BB046347  | 6.7003 | 7.7316  | -1.0313 |
| 1429407_at   | Pex11c        | peroxisomal biogenesis factor 11 gamma                     | AK007582  | 5.7123 | 6.7438  | -1.0315 |
| 1452190_at   | Prcp          | prolylcarboxypeptidase (angiotensinase C)                  | AK011112  | 6.8645 | 7.8961  | -1.0316 |
| 1424755_at   | Hip1          | huntingtin interacting protein 1                           | BB320674  | 6.5195 | 7.5511  | -1.0316 |
| 1435322_at   | Ankrd40       | ankyrin repeat domain 40                                   | BB213578  | 7.7581 | 8.7898  | -1.0317 |
| 1457465_at   | Shroom4       | shroom family member 4                                     | BB496399  | 7.9984 | 9.0303  | -1.0319 |
| 1454801_at   | Ankrd28       | ankyrin repeat domain 28                                   | BG066840  | 8.6837 | 9.7157  | -1.0319 |
| 1423626_at   | Dst           | dystonin                                                   | BB150886  | 9.5917 | 10.6237 | -1.0320 |
| 1415696_at   | Sar1a         | SAR1 gene homolog A (S. cerevisiae)                        | BC005549  | 9.8452 | 10.8771 | -1.0320 |
| 1417527_at   | Ap3m2         | adaptor-related protein complex 3, mu 2 subunit            | BC027301  | 6.5111 | 7.5434  | -1.0323 |
| 1418672_at   | Akr1c13       | aldo-keto reductase family 1, member C13                   | NM_013778 | 4.0372 | 5.0702  | -1.0330 |

|              |               |                                                                       |           |         |         |         |
|--------------|---------------|-----------------------------------------------------------------------|-----------|---------|---------|---------|
| 1418444_a_at | Gde1          | glycerophosphodiester phosphodiesterase 1                             | BC003902  | 9.4836  | 10.5166 | -1.0330 |
| 1428979_at   | Mtf1          | metal response element binding transcription factor 1                 | AV316320  | 6.5026  | 7.5356  | -1.0330 |
| 1427055_at   | Them4         | thioesterase superfamily member 4                                     | BC022612  | 5.3733  | 6.4073  | -1.0340 |
| 1418252_at   | Padi2         | peptidyl arginine deiminase, type II                                  | NM_008812 | 6.4302  | 7.4644  | -1.0342 |
| 1416021_a_at |               |                                                                       | BC002008  | 11.1561 | 12.1909 | -1.0348 |
| 1436164_at   | Slc30a1       | solute carrier family 30 (zinc transporter), member 1                 | BE685959  | 6.4242  | 7.4593  | -1.0352 |
| 1422754_at   | Tmod1         | tropomodulin 1                                                        | NM_021883 | 6.2582  | 7.2935  | -1.0353 |
| 1428317_at   | Fundc2        | FUN14 domain containing 2                                             | AI510221  | 6.2392  | 7.2750  | -1.0358 |
| 1456663_x_at | Tm2d2         | TM2 domain containing 2                                               | BB718785  | 8.7294  | 9.7652  | -1.0359 |
| 1433473_x_at | Tm2d2         | TM2 domain containing 2                                               | BB815513  | 7.5990  | 8.6353  | -1.0363 |
| 1436944_x_at |               |                                                                       | BB504983  | 9.8128  | 10.8492 | -1.0364 |
| 1416610_a_at | Clcn3         | chloride channel 3                                                    | NM_007711 | 8.2755  | 9.3126  | -1.0371 |
| 1431802_a_at | Ept1          | ethanolaminephosphotransferase 1 (CDP-ethanolamine-specific)          | AK014530  | 8.4035  | 9.4406  | -1.0371 |
| 1433817_at   | Agpat3        | 1-acylglycerol-3-phosphate O-acyltransferase 3                        | AV296997  | 6.7079  | 7.7451  | -1.0372 |
| 1443007_at   |               |                                                                       | AW545941  | 5.0401  | 6.0777  | -1.0376 |
| 1427442_a_at | App           | amyloid beta (A4) precursor protein                                   | BC005490  | 10.9996 | 12.0375 | -1.0379 |
| 1455746_at   | Kif13a        | kinesin family member 13A                                             | BF166390  | 8.4357  | 9.4741  | -1.0385 |
| 1444226_at   | Foxo3         | forkhead box O3                                                       | W07885    | 6.1467  | 7.1853  | -1.0386 |
| 1442115_at   | Fam38b        | family with sequence similarity 38, member B                          | BM220702  | 5.9590  | 6.9979  | -1.0389 |
| 1416900_s_at |               |                                                                       | NM_138647 | 5.8174  | 6.8564  | -1.0390 |
| 1430857_s_at | Pex11c        | peroxisomal biogenesis factor 11 gamma                                | AK007848  | 6.2848  | 7.3238  | -1.0390 |
| 1416137_at   | Anxa7         | annexin A7                                                            | BC008997  | 7.1217  | 8.1609  | -1.0392 |
| 1448983_at   | Cdrt4         | CMT1A duplicated region transcript 4                                  | NM_025496 | 5.8623  | 6.9016  | -1.0392 |
| 1444411_at   |               |                                                                       | BB309795  | 4.8229  | 5.8625  | -1.0396 |
| 1423480_at   | Nol11         | nucleolar protein 11                                                  | AK005123  | 7.9172  | 8.9577  | -1.0405 |
| 1424822_at   | Slain1        | SLAIN motif family, member 1                                          | BB704967  | 5.0998  | 6.1404  | -1.0406 |
| 1438709_at   | Wipi1         | WD repeat domain, phosphoinositide interacting 1                      | BB044002  | 6.2831  | 7.3238  | -1.0407 |
| 1427925_at   | Stx17         | syntaxin 17                                                           | BE943517  | 6.6564  | 7.6973  | -1.0408 |
| 1415685_at   | Mtif2         | mitochondrial translational initiation factor 2                       | NM_133767 | 8.9065  | 9.9477  | -1.0412 |
| 1433768_at   | Palld         | palladin, cytoskeletal associated protein                             | BG071905  | 7.9809  | 9.0224  | -1.0416 |
| 1415853_at   | Def8          | differentially expressed in FDCP 8                                    | NM_054046 | 7.2244  | 8.2662  | -1.0418 |
| 1445169_at   |               |                                                                       | BM232503  | 6.0653  | 7.1072  | -1.0419 |
| 1455089_at   | Gng12         | guanine nucleotide binding protein (G protein), gamma 12              | AW228775  | 9.1553  | 10.1975 | -1.0421 |
| 1436089_at   | Ints6         | integrator complex subunit 6                                          | BB401056  | 7.0245  | 8.0672  | -1.0427 |
| 1427997_at   | Ndufaf4       | NADH dehydrogenase (ubiquinone) 1 alpha subcomplex, assembly factor 4 | BG064890  | 9.0112  | 10.0542 | -1.0430 |
| 1434139_at   | Parp11        | poly (ADP-ribose) polymerase family, member 11                        | BB026163  | 7.6028  | 8.6466  | -1.0438 |
| 1424738_at   | Mudeng        | MU-2/AP1M2 domain containing, death-inducing                          | BE288551  | 6.5881  | 7.6320  | -1.0439 |
| 1437056_x_at | Crispld2      | cysteine-rich secretory protein LCCL domain containing 2              | BB558800  | 6.2214  | 7.2656  | -1.0443 |
| 1453274_at   | Ccdc103       | coiled-coil domain containing 103                                     | AK006639  | 4.7261  | 5.7709  | -1.0448 |
| 1458172_at   | Me2           | malic enzyme 2, NAD(+)-dependent, mitochondrial                       | BB200674  | 5.5433  | 6.5881  | -1.0448 |
| 1439571_at   | E230008J23Rik | RIKEN cDNA E230008J23 gene                                            | BB820889  | 5.2636  | 6.3084  | -1.0448 |
| 1426626_at   | Gtf2f2        | general transcription factor IIF, polypeptide 2                       | BB780444  | 8.5541  | 9.5995  | -1.0454 |
| 1455982_at   | Jmjd4         | jumonji domain containing 4                                           | BF466891  | 6.0047  | 7.0503  | -1.0456 |
| 1417049_at   | Rhd           | Rh blood group, D antigen                                             | AF069311  | 6.5925  | 7.6381  | -1.0457 |
| 1442100_at   | Inpp5f        | inositol polyphosphate-5-phosphatase F                                | BB619843  | 6.1749  | 7.2212  | -1.0463 |
| 1427934_at   | Lym2          | LYR motif containing 2                                                | AA250510  | 5.9820  | 7.0284  | -1.0463 |
| 1450153_at   | Gopc          | golgi associated PDZ and coiled-coil motif containing                 | NM_053187 | 5.4111  | 6.4574  | -1.0463 |
| 1455976_x_at | Dbi           | diazepam binding inhibitor                                            | AV019984  | 11.7921 | 12.8387 | -1.0466 |
| 1453000_at   | Camsap2       | calmodulin regulated spectrin-associated protein family, member 2     | AK005444  | 8.2552  | 9.3019  | -1.0466 |
| 1456782_at   |               |                                                                       | BB525604  | 6.0099  | 7.0572  | -1.0473 |
| 1424614_at   | Pgap2         | post-GPI attachment to proteins 2                                     | BG063931  | 7.9747  | 9.0220  | -1.0474 |
| 1425793_a_at | Rorc          | RAR-related orphan receptor gamma                                     | AJ132394  | 4.5539  | 5.6014  | -1.0475 |
| 1434281_at   | Dda1          | DET1 and DDB1 associated 1                                            | AV032244  | 8.6919  | 9.7401  | -1.0482 |
| 1429678_at   | 5730508B09Rik | RIKEN cDNA 5730508B09 gene                                            | AK017758  | 7.0682  | 8.1166  | -1.0484 |

|              |               |                                                                                                                |           |         |         |         |
|--------------|---------------|----------------------------------------------------------------------------------------------------------------|-----------|---------|---------|---------|
| 1426345_at   | Prepl         | prolyl endopeptidase-like                                                                                      | BB005298  | 6.9735  | 8.0221  | -1.0486 |
| 1435211_at   | Ttc12         | tetratricopeptide repeat domain 12                                                                             | BB554351  | 5.4679  | 6.5165  | -1.0487 |
| 1439745_at   | Cacng7        | calcium channel, voltage-dependent, gamma subunit 7                                                            | AV338037  | 6.3019  | 7.3506  | -1.0487 |
| 1440835_at   | Zfp27         | zinc finger protein 27                                                                                         | AV224554  | 5.5194  | 6.5689  | -1.0495 |
| 1422611_s_at | Igf2bp3       | insulin-like growth factor 2 mRNA binding protein 3                                                            | NM_023670 | 7.4445  | 8.4940  | -1.0495 |
| 1458135_at   |               |                                                                                                                | BB265352  | 4.4422  | 5.4923  | -1.0501 |
| 1454180_at   | Armc2         | armadillo repeat containing 2                                                                                  | AK011447  | 4.9988  | 6.0489  | -1.0502 |
| 1449040_a_at | Sephs2        | selenophosphate synthetase 2                                                                                   | NM_009266 | 8.5463  | 9.5972  | -1.0509 |
| 1451493_at   | Ndfip1        | Nedd4 family interacting protein 1                                                                             | BC026372  | 10.4425 | 11.4934 | -1.0509 |
| 1439235_x_at | Tm2d2         | TM2 domain containing 2                                                                                        | BE200117  | 8.0672  | 9.1186  | -1.0514 |
| 1452682_at   | Fam122b       | family with sequence similarity 122, member B                                                                  | AK019480  | 7.4127  | 8.4650  | -1.0524 |
| 1418947_at   | Nek3          | NIMA (never in mitosis gene a)-related expressed kinase 3                                                      | NM_011848 | 5.5747  | 6.6275  | -1.0528 |
| 1422809_at   | Rims2         | regulating synaptic membrane exocytosis 2                                                                      | NM_053271 | 4.5566  | 5.6100  | -1.0534 |
| 1424015_at   | Dennd5a       | DENN/MADD domain containing 5A                                                                                 | BC022119  | 10.8955 | 11.9489 | -1.0535 |
| 1439740_s_at | Uck2          | uridine-cytidine kinase 2                                                                                      | AU018180  | 9.1671  | 10.2206 | -1.0535 |
| 1425083_at   | Otor          | otoraplin                                                                                                      | AF243504  | 4.0004  | 5.0544  | -1.0540 |
| 1438528_at   |               |                                                                                                                | AW545979  | 4.5566  | 5.6110  | -1.0544 |
| 1458700_at   |               |                                                                                                                | BG793487  | 4.8130  | 5.8676  | -1.0546 |
| 1445191_at   | Exd1          | exonuclease 3'-5' domain containing 1                                                                          | BB762153  | 4.7835  | 5.8382  | -1.0547 |
| 1416886_at   | C1d           | C1D nuclear receptor co-repressor                                                                              | NM_020558 | 5.3409  | 6.3958  | -1.0548 |
| 1457594_at   |               |                                                                                                                | BG063310  | 4.2134  | 5.2685  | -1.0551 |
| 1435070_at   | Aebp2         | AE binding protein 2                                                                                           | BQ174632  | 7.8037  | 8.8597  | -1.0560 |
| 1444018_at   |               |                                                                                                                | BB794854  | 4.6127  | 5.6689  | -1.0562 |
| 1427905_at   | 1810063B07Rik | RIKEN cDNA 1810063B07 gene                                                                                     | BI414448  | 7.0514  | 8.1076  | -1.0562 |
| 1445574_at   |               |                                                                                                                | BG067678  | 5.1633  | 6.2200  | -1.0567 |
| 1425270_at   | Kif1b         | kinesin family member 1B                                                                                       | BE199508  | 6.7764  | 7.8337  | -1.0573 |
| 1439135_at   |               |                                                                                                                | BB129618  | 4.3535  | 5.4108  | -1.0574 |
| 1435723_at   | Gm9776        | predicted gene 9776                                                                                            | BB039336  | 4.4196  | 5.4771  | -1.0575 |
| 1433856_at   | Ppip5k2       | diphosphoinositol pentakisphosphate kinase 2                                                                   | AW555814  | 8.6093  | 9.6669  | -1.0576 |
| 1448303_at   | Gpnmb         | glycoprotein (transmembrane) nmb                                                                               | NM_053110 | 11.1043 | 12.1619 | -1.0576 |
| 1439842_at   | Zfp287        | zinc finger protein 287                                                                                        | AW488774  | 4.3054  | 5.3632  | -1.0579 |
| 1434783_at   | Tmem106c      | transmembrane protein 106C                                                                                     | BM222050  | 6.7678  | 7.8256  | -1.0579 |
| 1422128_at   | Rpl14         | ribosomal protein L14                                                                                          | NM_025974 | 7.5866  | 8.6446  | -1.0581 |
| 1456404_at   | Adamts5       | a disintegrin-like and metalloproteinase (reprolysin type) with thrombospondin type 1 motif, 5 (aggrecanase-2) | BB475194  | 4.1071  | 5.1653  | -1.0582 |
| 1452303_at   | Arhgef10      | Rho guanine nucleotide exchange factor (GEF) 10                                                                | AV345051  | 6.6221  | 7.6809  | -1.0589 |
| 1426884_at   | Rmnd5a        | required for meiotic nuclear division 5 homolog A ( <i>S. cerevisiae</i> )                                     | BG795169  | 9.1944  | 10.2542 | -1.0598 |
| 1433951_at   | Arl5a         | ADP-ribosylation factor-like 5A                                                                                | BG064956  | 10.7526 | 11.8128 | -1.0602 |
| 1434382_at   | Serinc2       | serine incorporator 2                                                                                          | AV083936  | 5.5818  | 6.6421  | -1.0603 |
| 1437568_at   | Mmp16         | matrix metalloproteinase 16                                                                                    | BB041237  | 4.6074  | 5.6679  | -1.0606 |
| 1434459_at   | Zc3h4         | zinc finger CCCH-type containing 4                                                                             | BF147898  | 8.2121  | 9.2735  | -1.0614 |
| 1427966_at   | Fam105b       | family with sequence similarity 105, member B                                                                  | AW551849  | 8.6055  | 9.6669  | -1.0614 |
| 1424026_s_at | Ginm1         | glycoprotein integral membrane 1                                                                               | BC013529  | 8.1502  | 9.2116  | -1.0614 |
| 1455338_at   | A4galt        | alpha 1,4-galactosyltransferase                                                                                | BG064632  | 4.8972  | 5.9590  | -1.0618 |
| 1457067_at   | Vps4b         | vacuolar protein sorting 4b (yeast)                                                                            | BB535696  | 4.1035  | 5.1653  | -1.0618 |
| 1426787_at   | Sfi1          | Sfi1 homolog, spindle assembly associated (yeast)                                                              | AW744519  | 4.7725  | 5.8351  | -1.0626 |
| 1449972_s_at |               |                                                                                                                | NM_011765 | 8.5375  | 9.6003  | -1.0628 |
| 1416989_at   | Vps53         | vacuolar protein sorting 53 (yeast)                                                                            | NM_026664 | 7.7421  | 8.8055  | -1.0634 |
| 1426960_a_at | Fa2h          | fatty acid 2-hydroxylase                                                                                       | BM118638  | 4.8719  | 5.9357  | -1.0638 |
| 1451134_a_at | Tm2d2         | TM2 domain containing 2                                                                                        | BC026789  | 8.8628  | 9.9266  | -1.0638 |
| 1429962_at   | Cebpz         | CCAAT/enhancer binding protein zeta                                                                            | AK017537  | 5.1546  | 6.2200  | -1.0654 |
| 1460642_at   | Traf4         | TNF receptor associated factor 4                                                                               | NM_009423 | 8.4507  | 9.5168  | -1.0661 |
| 1436541_at   | 2310008H09Rik | RIKEN cDNA 2310008H09 gene                                                                                     | BB452927  | 7.2263  | 8.2925  | -1.0661 |
| 1426899_at   | Tbc1d23       | TBC1 domain family, member 23                                                                                  | AV209678  | 6.5597  | 7.6260  | -1.0663 |
| 1442116_at   | Gpr176        | G protein-coupled receptor 176                                                                                 | BB311924  | 6.1134  | 7.1798  | -1.0665 |
| 1438712_at   | Dennd2d       | DENN/MADD domain containing 2D                                                                                 | AV372648  | 4.2016  | 5.2685  | -1.0668 |
| 1441186_at   | Sall3         | sal-like 3 ( <i>Drosophila</i> )                                                                               | BM119035  | 4.2745  | 5.3414  | -1.0669 |
| 1460483_at   | 2610034E01Rik | RIKEN cDNA 2610034E01 gene                                                                                     | AV115271  | 5.3054  | 6.3729  | -1.0675 |

|              |               |                                                                                   |           |         |         |         |
|--------------|---------------|-----------------------------------------------------------------------------------|-----------|---------|---------|---------|
| 1420967_at   | Slc25a15      | solute carrier family 25 (mitochondrial carrier ornithine transporter), member 15 | AW541300  | 7.8510  | 8.9185  | -1.0675 |
| 1435238_x_at | 2310009A05Rik | RIKEN cDNA 2310009A05 gene                                                        | AV004950  | 7.4502  | 8.5178  | -1.0677 |
| 1423841_at   | Brix1         | BRX1, biogenesis of ribosomes, homolog (S. cerevisiae)                            | BC014832  | 6.6564  | 7.7248  | -1.0684 |
| 1422924_at   | Tnfsf9        | tumor necrosis factor (ligand) superfamily, member 9                              | NM_009404 | 6.6423  | 7.7111  | -1.0688 |
| 1429279_at   | Wars2         | tryptophanyl tRNA synthetase 2 (mitochondrial)                                    | AK017602  | 5.3550  | 6.4242  | -1.0692 |
| 1452950_at   | Mettl15       | methyltransferase like 15                                                         | AK002682  | 5.3400  | 6.4092  | -1.0692 |
| 1450406_a_at | St3gal3       | ST3 beta-galactoside alpha-2,3-sialyltransferase 3                                | AK005053  | 7.7180  | 8.7873  | -1.0694 |
| 1455588_at   | Lym4          | LYR motif containing 4                                                            | BE952216  | 8.2142  | 9.2847  | -1.0705 |
| 1448148_at   | Grn           | granulin                                                                          | M86736    | 10.7121 | 11.7830 | -1.0709 |
| 1444106_at   | D330012F22Rik | RIKEN cDNA D330012F22 gene                                                        | BB522739  | 5.4107  | 6.4818  | -1.0711 |
| 1424836_a_at | Clasp2        | CLIP associating protein 2                                                        | BC026688  | 8.5732  | 9.6451  | -1.0719 |
| 1424084_at   | Rod1          | ROD1 regulator of differentiation 1 (S. pombe)                                    | BB519382  | 5.8155  | 6.8879  | -1.0724 |
| 1423583_at   | Fem1a         | feminization 1 homolog a (C. elegans)                                             | AK005041  | 5.8484  | 6.9213  | -1.0729 |
| 1429410_at   | Eny2          | enhancer of yellow 2 homolog (Drosophila)                                         | AI595744  | 6.5111  | 7.5840  | -1.0729 |
| 1439454_x_at | Tm2d2         | TM2 domain containing 2                                                           | AV337733  | 8.8464  | 9.9199  | -1.0735 |
| 1429785_at   | 5830458C19Rik | RIKEN cDNA 5830458C19 gene                                                        | BB192700  | 4.4874  | 5.5610  | -1.0735 |
| 1429824_at   | 4930550C14Rik | RIKEN cDNA 4930550C14 gene                                                        | AK016083  | 4.0511  | 5.1247  | -1.0735 |
| 1443233_at   |               |                                                                                   | BB042748  | 4.5947  | 5.6689  | -1.0742 |
| 1455244_at   | Daam1         | dishevelled associated activator of morphogenesis 1                               | BB794633  | 8.5887  | 9.6633  | -1.0747 |
| 1426306_a_at | Maged2        | melanoma antigen, family D, 2                                                     | AF319976  | 8.5922  | 9.6669  | -1.0747 |
| 1428411_at   | 1700020I14Rik | RIKEN cDNA 1700020I14 gene                                                        | AK004510  | 7.9936  | 9.0684  | -1.0748 |
| 1439960_at   | Rpusd2        | RNA pseudouridylate synthase domain containing 2                                  | AI746468  | 4.7629  | 5.8382  | -1.0752 |
| 1426631_at   | Pus7          | pseudouridylate synthase 7 homolog (S. cerevisiae)                                | BM199125  | 9.4164  | 10.4917 | -1.0753 |
| 1435592_at   | Eif5b         | eukaryotic translation initiation factor 5B                                       | BB149997  | 5.8297  | 6.9051  | -1.0754 |
| 1428653_x_at | Elavl1        | ELAV (embryonic lethal, abnormal vision)-like 1 (Hu antigen R)                    | BB003384  | 5.6689  | 6.7443  | -1.0754 |
| 1440050_at   | Hbs1l         | Hbs1-like (S. cerevisiae)                                                         | BG067949  | 6.3554  | 7.4308  | -1.0754 |
| 1429218_at   | Det1          | de-etiolated homolog 1 (Arabidopsis)                                              | BE457100  | 6.5578  | 7.6333  | -1.0755 |
| 1433885_at   | Iqgap2        | IQ motif containing GTPase activating protein 2                                   | BM240173  | 6.4595  | 7.5356  | -1.0761 |
| 1416945_at   | Ptov1         | prostate tumor over expressed gene 1                                              | NM_133949 | 8.3312  | 9.4085  | -1.0773 |
| 1423962_at   | Wdr26         | WD repeat domain 26                                                               | BC020044  | 6.7378  | 7.8151  | -1.0774 |
| 1456722_at   | Chrdl1        | chordin-like 1                                                                    | BI966456  | 4.2989  | 5.3765  | -1.0777 |
| 1424674_at   | Slc39a6       | solute carrier family 39 (metal ion transporter), member 6                        | BB825002  | 10.7734 | 11.8514 | -1.0780 |
| 1418327_at   | 1110058L19Rik | RIKEN cDNA 1110058L19 gene                                                        | NM_026503 | 9.0245  | 10.1027 | -1.0782 |
| 1438386_x_at | Mat2a         | methionine adenosyltransferase II, alpha                                          | BB470596  | 9.6617  | 10.7400 | -1.0782 |
| 1448877_at   | Dlx2          | distal-less homeobox 2                                                            | NM_010054 | 4.7852  | 5.8635  | -1.0783 |
| 1417094_at   | Acot7         | acyl-CoA thioesterase 7                                                           | NM_133348 | 10.4536 | 11.5319 | -1.0783 |
| 1440325_at   |               |                                                                                   | AV332226  | 4.2966  | 5.3750  | -1.0784 |
| 1450899_at   | Nedd1         | neural precursor cell expressed, developmentally down-regulated gene 1            | BB829652  | 8.0401  | 9.1186  | -1.0786 |
| 1434566_a_at | Pramef8       | PRAME family member 8                                                             | BE952228  | 7.5094  | 8.5883  | -1.0789 |
| 1450798_at   | Tnxb          | tenascin XB                                                                       | NM_031176 | 4.4196  | 5.4985  | -1.0789 |
| 1459735_at   | Fkbp15        | FK506 binding protein 15                                                          | AW260365  | 4.4196  | 5.4985  | -1.0789 |
| 1454958_at   | Gsk3b         | glycogen synthase kinase 3 beta                                                   | BQ175580  | 9.0212  | 10.1005 | -1.0793 |
| 1447426_at   |               |                                                                                   | BF465664  | 4.9249  | 6.0047  | -1.0798 |
| 1430045_at   | Tsnax         | translin-associated factor X                                                      | BM119928  | 4.2966  | 5.3765  | -1.0799 |
| 1440947_at   | Prrc2c        | proline-rich coiled-coil 2C                                                       | BB481861  | 4.1944  | 5.2743  | -1.0799 |
| 1454676_s_at | Ticam1        | toll-like receptor adaptor molecule 1                                             | BB452539  | 6.2794  | 7.3594  | -1.0800 |
| 1426603_at   | Rnasel        | ribonuclease L (2', 5'-oligoadenylate synthetase-dependent)                       | BF714880  | 4.6463  | 5.7266  | -1.0803 |
| 1451684_a_at | Bicd1         | bicaudal D homolog 1 (Drosophila)                                                 | BC016192  | 4.8553  | 5.9357  | -1.0803 |
| 1432118_at   | 2410012E07Rik | RIKEN cDNA 2410012E07 gene                                                        | AK010467  | 5.6409  | 6.7217  | -1.0808 |
| 1448031_at   | Gnao1         | guanine nucleotide binding protein, alpha O                                       | AA231554  | 4.5302  | 5.6110  | -1.0808 |
| 1419081_at   | Atg10         | autophagy related 10                                                              | NM_025770 | 5.3054  | 6.3868  | -1.0814 |
| 1439073_at   | Zfp160        | zinc finger protein 160                                                           | BB821719  | 4.9228  | 6.0047  | -1.0819 |
| 1435665_at   | Trim30d       | tripartite motif-containing 30D                                                   | BM241342  | 8.2462  | 9.3285  | -1.0823 |
| 1431003_a_at | 2610002J02Rik | RIKEN cDNA 2610002J02 gene                                                        | AK003268  | 8.0922  | 9.1750  | -1.0828 |
| 1418120_at   | Rbm8a         | RNA binding motif protein 8a                                                      | NM_025875 | 6.9332  | 8.0161  | -1.0829 |

|              |               |                                                                                     |           |         |         |         |
|--------------|---------------|-------------------------------------------------------------------------------------|-----------|---------|---------|---------|
| 1433486_at   | Clcn3         | chloride channel 3                                                                  | BI739053  | 8.2709  | 9.3540  | -1.0831 |
| 1448892_at   | Dock7         | dedicator of cytokinesis 7                                                          | NM_026082 | 10.3308 | 11.4139 | -1.0831 |
| 1456769_at   | Dusp3         | dual specificity phosphatase 3 (vaccinia virus phosphatase VH1-related)             | BQ266434  | 6.4077  | 7.4909  | -1.0832 |
| 1436577_at   | Arhgef9       | CDC42 guanine nucleotide exchange factor (GEF) 9                                    | BB380620  | 4.1950  | 5.2785  | -1.0834 |
| 1457568_at   | Hnrnpd        | heterogeneous nuclear ribonucleoprotein D                                           | BB380198  | 5.8373  | 6.9213  | -1.0840 |
| 1442046_at   | Shroom2       | shroom family member 2                                                              | BM119167  | 5.1990  | 6.2831  | -1.0841 |
| 1445414_at   |               |                                                                                     | BB713790  | 4.6674  | 5.7515  | -1.0841 |
| 1417588_at   | Galnt3        | UDP-N-acetyl-alpha-D-galactosamine:polypeptide N-acetylgalactosaminyltransferase 3  | AK019995  | 3.9701  | 5.0544  | -1.0843 |
| 1435974_at   | Arhgef9       | CDC42 guanine nucleotide exchange factor (GEF) 9                                    | BB271482  | 3.9701  | 5.0544  | -1.0843 |
| 1435057_x_at | Polr1e        | polymerase (RNA) I polypeptide E                                                    | BE334128  | 7.2575  | 8.3423  | -1.0847 |
| 1422523_at   | Pmel          | premelanosome protein                                                               | NM_021882 | 5.2685  | 6.3537  | -1.0852 |
| 1424025_at   | Ginm1         | glycoprotein integral membrane 1                                                    | BC013529  | 7.9804  | 9.0658  | -1.0853 |
| 1451050_at   | Nt5c3         | 5'-nucleotidase, cytosolic III                                                      | AV037573  | 8.5262  | 9.6120  | -1.0858 |
| 1428718_at   | Scrn1         | secernin 1                                                                          | AW490544  | 4.8958  | 5.9820  | -1.0863 |
| 1419367_at   | Decr1         | 2,4-dienoyl CoA reductase 1, mitochondrial                                          | NM_026172 | 9.3462  | 10.4328 | -1.0865 |
| 1449014_at   | Lactb         | lactamase, beta                                                                     | NM_030717 | 7.5175  | 8.6044  | -1.0869 |
| 1450850_at   | Ezr           | ezrin                                                                               | BM119387  | 9.9760  | 11.0635 | -1.0876 |
| 1434481_at   | Msl1          | male-specific lethal 1 homolog (Drosophila)                                         | BI695596  | 8.4589  | 9.5467  | -1.0877 |
| 1426321_at   | Tbx4          | T-box 4                                                                             | AY075134  | 4.4094  | 5.4985  | -1.0891 |
| 1456013_x_at | Slc35a4       | solute carrier family 35, member A4                                                 | BB396486  | 7.9227  | 9.0124  | -1.0896 |
| 1433747_at   |               |                                                                                     | BQ176475  | 9.7953  | 10.8851 | -1.0898 |
| 1452828_at   | Fbxo21        | F-box protein 21                                                                    | BG076338  | 7.3650  | 8.4548  | -1.0898 |
| 1420650_at   | Zfhx3         | zinc finger homeobox 3                                                              | NM_007496 | 6.2795  | 7.3694  | -1.0899 |
| 1452953_at   | Fam18b        | family with sequence similarity 18, member B                                        | AK017572  | 9.6340  | 10.7241 | -1.0901 |
| 1424999_at   | Znr1as        | ZNRD1 antisense RNA                                                                 | BC027007  | 6.8057  | 7.8961  | -1.0903 |
| 1434690_at   | Lclat1        | lysocardiolipin acyltransferase 1                                                   | BM237177  | 9.5350  | 10.6256 | -1.0906 |
| 1452666_a_at | Tmcc2         | transmembrane and coiled-coil domains 2                                             | AK004359  | 7.5395  | 8.6302  | -1.0908 |
| 1452331_s_at | Qser1         | glutamine and serine rich 1                                                         | BC021511  | 6.4791  | 7.5699  | -1.0908 |
| 1441696_at   |               |                                                                                     | AW552696  | 4.4196  | 5.5105  | -1.0909 |
| 1460320_at   | Becn1         | beclin 1, autophagy related                                                         | NM_019584 | 9.6532  | 10.7444 | -1.0912 |
| 1434859_at   | Umps          | uridine monophosphate synthetase                                                    | BB127793  | 8.1235  | 9.2150  | -1.0915 |
| 1456300_at   | Ilvbl         | ilvB (bacterial acetolactate synthase)-like                                         | AV290889  | 5.7245  | 6.8166  | -1.0921 |
| 1455231_s_at | Apc2          | adenomatosis polyposis coli 2                                                       | BM114349  | 5.3142  | 6.4073  | -1.0931 |
| 1448214_at   | Pdhb          | pyruvate dehydrogenase (lipoamide) beta                                             | AK011810  | 5.8041  | 6.8973  | -1.0932 |
| 1438154_x_at | 2610002J02Rik | RIKEN cDNA 2610002J02 gene                                                          | AV218922  | 8.3903  | 9.4838  | -1.0934 |
| 1422610_s_at | Igf2bp3       | insulin-like growth factor 2 mRNA binding protein 3                                 | NM_023670 | 8.3517  | 9.4454  | -1.0937 |
| 1433991_x_at | Dbi           | diazepam binding inhibitor                                                          | AV007315  | 11.9487 | 13.0425 | -1.0937 |
| 1432073_at   |               |                                                                                     | AK007198  | 7.0480  | 8.1423  | -1.0943 |
| 1440264_at   |               |                                                                                     | BB213500  | 5.2430  | 6.3376  | -1.0947 |
| 1455182_at   | Kif1b         | kinesin family member 1B                                                            | AV104668  | 7.6668  | 8.7615  | -1.0947 |
| 1434142_at   | Ppm1d         | protein phosphatase 1D magnesium-dependent, delta isoform                           | BG076151  | 6.9213  | 8.0161  | -1.0948 |
| 1437001_at   | Gsk3b         | glycogen synthase kinase 3 beta                                                     | BQ173949  | 9.0610  | 10.1563 | -1.0953 |
| 1424421_at   |               |                                                                                     | BC006806  | 6.6421  | 7.7384  | -1.0963 |
| 1423112_at   | Ube2d3        | ubiquitin-conjugating enzyme E2D 3                                                  | AK009276  | 6.6079  | 7.7045  | -1.0966 |
| 1423958_a_at | Ttc33         | tetratricopeptide repeat domain 33                                                  | BC017533  | 8.6523  | 9.7494  | -1.0971 |
| 1450501_at   | Itga2         | integrin alpha 2                                                                    | NM_008396 | 5.3765  | 6.4737  | -1.0972 |
| 1417208_at   | Amacr         | alpha-methylacyl-CoA racemase                                                       | NM_008537 | 6.9708  | 8.0685  | -1.0977 |
| 1420328_at   | Rep15         | RAB15 effector protein                                                              | NM_025620 | 5.8116  | 6.9094  | -1.0978 |
| 1435896_at   | Sfxn2         | sideroflexin 2                                                                      | BG066686  | 6.6997  | 7.7979  | -1.0982 |
| 1453719_at   | 4930506C21Rik | RIKEN cDNA 4930506C21 gene                                                          | AK015714  | 4.1689  | 5.2675  | -1.0986 |
| 1454794_at   | Spast         | spastin                                                                             | AV298495  | 7.6354  | 8.7343  | -1.0988 |
| 1452608_at   | Mycbp         | c-myc binding protein                                                               | BB046347  | 7.3695  | 8.4683  | -1.0989 |
| 1448618_at   | Mvp           | major vault protein                                                                 | NM_080638 | 7.9052  | 9.0043  | -1.0991 |
| 1459994_x_at | Tfr2          | transferrin receptor 2                                                              | AV027486  | 3.9701  | 5.0695  | -1.0994 |
| 1451075_s_at | Ctdsp2        | CTD (carboxy-terminal domain, RNA polymerase II, polypeptide A) small phosphatase 2 | BB294133  | 10.4212 | 11.5206 | -1.0994 |
| 1459267_at   | 2310033P09Rik | RIKEN cDNA 2310033P09 gene                                                          | BB097524  | 5.2733  | 6.3729  | -1.0996 |
| 1428693_at   | 2610044O15Rik | RIKEN cDNA 2610044O15 gene                                                          | AK011776  | 5.1242  | 6.2239  | -1.0997 |



|              |               |                                                              |           |         |         |         |
|--------------|---------------|--------------------------------------------------------------|-----------|---------|---------|---------|
| 1456500_at   | Aph1b         | anterior pharynx defective 1b homolog (C. elegans)           | AV232784  | 7.7180  | 8.8177  | -1.0997 |
| 1457707_at   | Mctp2         | multiple C2 domains, transmembrane 2                         | BB817942  | 7.4308  | 8.5306  | -1.0998 |
| 1433860_at   | 6030458C11Rik | RIKEN cDNA 6030458C11 gene                                   | BB126127  | 8.1619  | 9.2634  | -1.1014 |
| 1434291_a_at | Serf1         | small EDRK-rich factor 1                                     | AA709993  | 7.5664  | 8.6684  | -1.1021 |
| 1453709_at   | Arhgap32      | Rho GTPase activating protein 32                             | AV172660  | 4.5668  | 5.6689  | -1.1021 |
| 1430425_at   | Sdk2          | sidekick homolog 2 (chicken)                                 | AW493494  | 5.0544  | 6.1565  | -1.1021 |
| 1455854_a_at | Ssh1          | slingshot homolog 1 (Drosophila)                             | BB053082  | 7.5425  | 8.6446  | -1.1021 |
| 1420129_s_at | D10Wsu52e     | DNA segment, Chr 10, Wayne State University 52, expressed    | AA409545  | 10.7388 | 11.8413 | -1.1024 |
| 1430303_at   | Ccdc41        | coiled-coil domain containing 41                             | AI465236  | 5.5917  | 6.6941  | -1.1024 |
| 1441263_a_at | A930005H10Rik | RIKEN cDNA A930005H10 gene                                   | AV009179  | 6.0255  | 7.1280  | -1.1025 |
| 1429164_at   | Prss36        | protease, serine, 36                                         | AK021185  | 6.7933  | 7.8964  | -1.1031 |
| 1419299_at   | 2010012O05Rik | RIKEN cDNA 2010012O05 gene                                   | NM_025563 | 6.6079  | 7.7111  | -1.1031 |
| 1460500_at   | Gm3715        | predicted gene 3715                                          | AK017182  | 3.9612  | 5.0644  | -1.1032 |
| 1447864_s_at | Pogk          | pogo transposable element with KRAB domain                   | AV377712  | 7.3230  | 8.4271  | -1.1041 |
| 1416151_at   | Srsf3         | serine/arginine-rich splicing factor 3                       | NM_013663 | 8.5853  | 9.6900  | -1.1047 |
| 1437872_at   | Napepld       | N-acyl phosphatidylethanolamine phospholipase D              | BB325565  | 5.2306  | 6.3356  | -1.1050 |
| 1426614_at   | Zmynd8        | zinc finger, MYND-type containing 8                          | BB523906  | 9.7825  | 10.8878 | -1.1053 |
| 1426740_s_at | Armc5         | armadillo repeat containing 5                                | AV273850  | 6.7511  | 7.8573  | -1.1062 |
| 1420427_a_at | Dhx32         | DEAH (Asp-Glu-Ala-His) box polypeptide 32                    | NM_133941 | 8.1859  | 9.2925  | -1.1066 |
| 1433730_at   | Elmod2        | ELMO/CED-12 domain containing 2                              | BQ031040  | 8.1559  | 9.2634  | -1.1076 |
| 1435801_at   | Fktn          | fukutin                                                      | AV365405  | 8.3934  | 9.5009  | -1.1076 |
| 1428957_at   | Tmem177       | transmembrane protein 177                                    | BI133227  | 6.5730  | 7.6809  | -1.1079 |
| 1416398_at   | Mesdc1        | mesoderm development candidate 1                             | BB474887  | 4.2333  | 5.3414  | -1.1081 |
| 1418908_at   | Pam           | peptidylglycine alpha-amidating monooxygenase                | NM_013626 | 8.1788  | 9.2874  | -1.1086 |
| 1435379_at   | Urb2          | URB2 ribosome biogenesis 2 homolog (S. cerevisiae)           | C87981    | 7.9499  | 9.0586  | -1.1087 |
| 1437771_at   | Lrrn4cl       | LRRN4 C-terminal like                                        | BB783125  | 5.6970  | 6.8057  | -1.1088 |
| 1459832_s_at | Ap1m1         | adaptor-related protein complex AP-1, mu subunit 1           | BB433211  | 9.3849  | 10.4939 | -1.1090 |
| 1417098_s_at | Mecr          | mitochondrial trans-2-enoyl-CoA reductase                    | NM_025297 | 7.1544  | 8.2636  | -1.1091 |
| 1422692_at   | Sub1          | SUB1 homolog (S. cerevisiae)                                 | BE989104  | 7.3490  | 8.4589  | -1.1100 |
| 1453732_at   | Ccdc90a       | coiled-coil domain containing 90A                            | BF533688  | 5.4771  | 6.5879  | -1.1108 |
| 1424055_at   | Ncoa5         | nuclear receptor coactivator 5                               | BC017152  | 6.8042  | 7.9153  | -1.1111 |
| 1450980_at   | Gtpbp3        | GTP binding protein 3                                        | BM207274  | 7.4066  | 8.5178  | -1.1112 |
| 1445532_at   | Myo16         | myosin XVI                                                   | BB081552  | 4.2319  | 5.3432  | -1.1113 |
| 1423298_at   | Add3          | adducin 3 (gamma)                                            | BM239842  | 7.4614  | 8.5732  | -1.1118 |
| 1417480_at   | Fbxo9         | f-box protein 9                                              | NM_023605 | 7.5262  | 8.6382  | -1.1120 |
| 1448404_at   | Scamp2        | secretory carrier membrane protein 2                         | BG965399  | 7.9823  | 9.0944  | -1.1121 |
| 1418815_at   | Cdh2          | cadherin 2                                                   | BC022107  | 9.9711  | 11.0834 | -1.1123 |
| 1442050_at   | Zfp608        | zinc finger protein 608                                      | AV274175  | 6.0922  | 7.2050  | -1.1127 |
| 1449875_s_at |               |                                                              | NM_010395 | 10.1693 | 11.2824 | -1.1131 |
| 1454831_at   | Foxn2         | forkhead box N2                                              | AV221013  | 8.9864  | 10.0996 | -1.1132 |
| 1426253_at   | Pacrgl        | PARK2 co-regulated-like                                      | BC018481  | 7.3498  | 8.4630  | -1.1132 |
| 1421998_at   | Tor3a         | torsin family 3, member A                                    | NM_023141 | 7.4081  | 8.5215  | -1.1134 |
| 1435368_a_at | Parp1         | poly (ADP-ribose) polymerase family, member 1                | BB767586  | 9.1324  | 10.2465 | -1.1141 |
| 1453957_a_at | Igf2bp3       | insulin-like growth factor 2 mRNA binding protein 3          | AK011797  | 6.0440  | 7.1586  | -1.1146 |
| 1437085_at   | D630039A03Rik | RIKEN cDNA D630039A03 gene                                   | AV370040  | 4.9122  | 6.0270  | -1.1148 |
| 1418109_at   | Gspt2         | G1 to S phase transition 2                                   | NM_008179 | 7.4224  | 8.5374  | -1.1150 |
| 1427529_at   | Fzd9          | frizzled homolog 9 (Drosophila)                              | Y17709    | 5.8305  | 6.9458  | -1.1153 |
| 1426693_x_at | Cox15         | COX15 homolog, cytochrome c oxidase assembly protein (yeast) | BC021498  | 7.9926  | 9.1082  | -1.1156 |
| 1423777_at   | Usp20         | ubiquitin specific peptidase 20                              | AK006800  | 6.0987  | 7.2147  | -1.1160 |
| 1435438_at   | Sox8          | SRY-box containing gene 8                                    | AV345303  | 3.9806  | 5.0970  | -1.1164 |
| 1439069_a_at | Pisd-ps3      | phosphatidylserine decarboxylase, pseudogene 3               | BB006121  | 8.6803  | 9.7975  | -1.1172 |
| 1421253_at   | Nrap          | nebulin-related anchoring protein                            | NM_008733 | 5.5249  | 6.6421  | -1.1172 |
| 1459034_at   | Wdr19         | WD repeat domain 19                                          | BB747656  | 4.4196  | 5.5375  | -1.1179 |
| 1417667_a_at | Pter          | phosphotriesterase related                                   | NM_008961 | 8.8877  | 10.0057 | -1.1180 |
| 1423608_at   | Itm2a         | integral membrane protein 2A                                 | BI966443  | 9.3336  | 10.4518 | -1.1181 |
| 1448333_at   | Adprh         | ADP-ribosylarginine hydrolase                                | AF244347  | 9.9399  | 11.0587 | -1.1188 |
| 1455132_at   | Rasa13        | RAS protein activator like 3                                 | AV312663  | 4.8858  | 6.0047  | -1.1189 |

|              |               |                                                                                |           |         |         |         |
|--------------|---------------|--------------------------------------------------------------------------------|-----------|---------|---------|---------|
| 1448751_at   | Ap3m2         | adaptor-related protein complex 3, mu 2 subunit                                | BC027301  | 5.7781  | 6.8973  | -1.1193 |
| 1428124_at   | Gtf2e1        | general transcription factor II E, polypeptide 1 (alpha subunit)               | AK011543  | 8.7389  | 9.8583  | -1.1194 |
| 1460397_at   | Armc6         | armadillo repeat containing 6                                                  | BB402275  | 5.7492  | 6.8688  | -1.1196 |
| 1423046_s_at | Ncbp2         | nuclear cap binding protein subunit 2                                          | BE285362  | 8.7478  | 9.8676  | -1.1198 |
| 1439869_at   | Zfp493        | zinc finger protein 493                                                        | BB326106  | 5.4680  | 6.5881  | -1.1201 |
| 1433726_at   | 2310035C23Rik | RIKEN cDNA 2310035C23 gene                                                     | BB124070  | 8.3203  | 9.4427  | -1.1224 |
| 1419058_at   | Polr1e        | polymerase (RNA) I polypeptide E                                               | NM_022811 | 6.7280  | 7.8510  | -1.1230 |
| 1453109_at   | Arsk          | arylsulfatase K                                                                | AK013194  | 6.0047  | 7.1280  | -1.1233 |
| 1424083_at   | Rod1          | ROD1 regulator of differentiation 1 (S. pombe)                                 | BB519382  | 7.5356  | 8.6591  | -1.1235 |
| 1438254_at   |               |                                                                                | BF118887  | 7.4419  | 8.5656  | -1.1237 |
| 1436982_at   | Tnrc6b        | trinucleotide repeat containing 6b                                             | BB788270  | 9.0627  | 10.1864 | -1.1237 |
| 1448619_at   | Dhcr7         | 7-dehydrocholesterol reductase                                                 | NM_007856 | 8.7084  | 9.8322  | -1.1237 |
| 1455779_at   | Mtap1a        | microtubule-associated protein 1 A                                             | BQ175021  | 5.7529  | 6.8770  | -1.1241 |
| 1428839_at   | Wdr53         | WD repeat domain 53                                                            | AK005105  | 7.1485  | 8.2752  | -1.1267 |
| 1448152_at   | Igf2          | insulin-like growth factor 2                                                   | NM_010514 | 5.5812  | 6.7079  | -1.1267 |
| 1459983_at   | Impa2         | inositol (myo)-1(or 4)-monophosphatase 2                                       | AI115397  | 6.0418  | 7.1687  | -1.1268 |
| 1443466_s_at | Polr3b        | polymerase (RNA) III (DNA directed) polypeptide B                              | C85372    | 6.5111  | 7.6381  | -1.1270 |
| 1444560_at   | St7l          | suppression of tumorigenicity 7-like                                           | AI834981  | 4.1035  | 5.2306  | -1.1272 |
| 1434868_at   | 4933431E20Rik | RIKEN cDNA 4933431E20 gene                                                     | AV282706  | 4.6826  | 5.8098  | -1.1272 |
| 1424392_at   | Adhfe1        | alcohol dehydrogenase, iron containing, 1                                      | BC026584  | 4.4073  | 5.5346  | -1.1273 |
| 1429268_at   | 2610318N02Rik | RIKEN cDNA 2610318N02 gene                                                     | AK012048  | 5.8057  | 6.9332  | -1.1275 |
| 1434315_at   | Nipal3        | NIPA-like domain containing 3                                                  | BB667103  | 6.3197  | 7.4474  | -1.1278 |
| 1418326_at   | Slc7a5        | solute carrier family 7 (cationic amino acid transporter, y+ system), member 5 | BC026131  | 10.1681 | 11.2961 | -1.1279 |
| 1420523_at   | Ccdc50        | coiled-coil domain containing 50                                               | NM_026202 | 4.0372  | 5.1653  | -1.1281 |
| 1424001_at   | Mki67ip       | Mki67 (FHA domain) interacting nucleolar phosphoprotein                        | AY030275  | 8.8692  | 9.9975  | -1.1282 |
| 1418361_at   | Gas8          | growth arrest specific 8                                                       | NM_018855 | 7.4224  | 8.5516  | -1.1292 |
| 1425369_a_at | Sox10         | SRY-box containing gene 10                                                     | BC018551  | 4.9195  | 6.0489  | -1.1295 |
| 1452256_at   | 1110002N22Rik | RIKEN cDNA 1110002N22 gene                                                     | AK003325  | 7.1992  | 8.3289  | -1.1296 |
| 1426312_at   | Bre           | brain and reproductive organ-expressed protein                                 | BE984258  | 9.1870  | 10.3173 | -1.1302 |
| 1416551_at   | Atp2a2        | ATPase, Ca++ transporting, cardiac muscle, slow twitch 2                       | NM_009722 | 8.5438  | 9.6746  | -1.1307 |
| 1423667_at   | Mat2a         | methionine adenosyltransferase II, alpha                                       | BC003451  | 10.7238 | 11.8555 | -1.1316 |
| 1453162_at   | Utp11l        | UTP11-like, U3 small nucleolar ribonucleoprotein, (yeast)                      | AK008801  | 8.1849  | 9.3168  | -1.1318 |
| 1444150_at   | Epb4.1        | erythrocyte protein band 4.1                                                   | BB462549  | 4.0334  | 5.1653  | -1.1319 |
| 1433754_at   | Mbnl2         | muscleblind-like 2                                                             | BI649713  | 10.8172 | 11.9497 | -1.1325 |
| 1416292_at   | Prdx3         | peroxiredoxin 3                                                                | NM_007452 | 9.6594  | 10.7921 | -1.1327 |
| 1449278_at   | Eif2ak3       | eukaryotic translation initiation factor 2 alpha kinase 3                      | NM_010121 | 8.5849  | 9.7179  | -1.1330 |
| 1422011_s_at |               |                                                                                | BC005560  | 9.1453  | 10.2788 | -1.1335 |
| 1456144_at   | Nav3          | neuron navigator 3                                                             | AW537064  | 8.7973  | 9.9310  | -1.1338 |
| 1455592_at   | Vangl2        | vang-like 2 (van gogh, Drosophila)                                             | BM211048  | 5.0665  | 6.2005  | -1.1340 |
| 1420639_at   | Jmy           | junction-mediating and regulatory protein                                      | BF227962  | 5.6843  | 6.8186  | -1.1343 |
| 1417881_at   | Slc39a3       | solute carrier family 39 (zinc transporter), member 3                          | AV369681  | 5.6970  | 6.8313  | -1.1343 |
| 1456310_a_at | 2610002J02Rik | RIKEN cDNA 2610002J02 gene                                                     | AV218922  | 8.7712  | 9.9057  | -1.1345 |
| 1460695_a_at | 201011101Rik  | RIKEN cDNA 201011101 gene                                                      | BC027288  | 7.8758  | 9.0109  | -1.1351 |
| 1443710_s_at | Spats1        | spermatogenesis associated, serine-rich 1                                      | AW045373  | 5.0650  | 6.2005  | -1.1355 |
| 1424111_at   | Igf2r         | insulin-like growth factor 2 receptor                                          | BG092290  | 8.1009  | 9.2365  | -1.1356 |
| 1434169_at   | Kazn          | kazrin, periplakin interacting protein                                         | BQ175107  | 5.6219  | 6.7577  | -1.1358 |
| 1443335_at   |               |                                                                                | BB481555  | 4.0556  | 5.1918  | -1.1361 |
| 1443498_at   | Mmab          | methylmalonic aciduria (cobalamin deficiency) type B homolog (human)           | BB082226  | 4.8229  | 5.9590  | -1.1361 |
| 1448484_at   | Amd1          | S-adenosylmethionine decarboxylase 1                                           | NM_009665 | 10.4712 | 11.6079 | -1.1367 |
| 1455345_at   | Phf15         | PHD finger protein 15                                                          | BI663145  | 8.6401  | 9.7784  | -1.1383 |
| 1456038_at   | Fbxl4         | F-box and leucine-rich repeat protein 4                                        | BB003709  | 7.9126  | 9.0510  | -1.1384 |
| 1428883_at   | Tmem57        | transmembrane protein 57                                                       | AK003528  | 8.3672  | 9.5056  | -1.1384 |
| 1434568_at   |               |                                                                                | BG065425  | 5.8297  | 6.9684  | -1.1386 |
| 1455807_at   | Tspyl5        | testis-specific protein, Y-encoded-like 5                                      | AV332105  | 4.7619  | 5.9007  | -1.1388 |
| 1425742_a_at | Tsc22d1       | TSC22 domain family, member 1                                                  | AF201285  | 11.6119 | 12.7512 | -1.1394 |
| 1430651_s_at | Zfp191        | zinc finger protein 191                                                        | AI504586  | 6.8313  | 7.9708  | -1.1395 |
| 1418560_at   | Pdha1         | pyruvate dehydrogenase E1 alpha 1                                              | NM_008810 | 10.5545 | 11.6941 | -1.1396 |

|              |               |                                                                                              |           |         |         |         |
|--------------|---------------|----------------------------------------------------------------------------------------------|-----------|---------|---------|---------|
| 1448271_a_at | Ddx21         | DEAD (Asp-Glu-Ala-Asp) box polypeptide 21                                                    | BM246099  | 7.8997  | 9.0404  | -1.1407 |
| 1419760_a_at | Rwdd2b        | RWD domain containing 2B                                                                     | NM_016924 | 6.8229  | 7.9638  | -1.1409 |
| 1442315_at   | Foxd2         | forkhead box D2                                                                              | A1426778  | 5.4345  | 6.5760  | -1.1415 |
| 1456833_at   | Gpr17         | G protein-coupled receptor 17                                                                | BB353220  | 4.2333  | 5.3753  | -1.1419 |
| 1457097_at   | Skap2         | src family associated phosphoprotein 2                                                       | BB212597  | 5.9249  | 7.0683  | -1.1435 |
| 1435237_at   | 2310009A05Rik | RIKEN cDNA 2310009A05 gene                                                                   | AV004950  | 7.2147  | 8.3585  | -1.1437 |
| 1440880_at   |               |                                                                                              | BI648107  | 6.2155  | 7.3594  | -1.1438 |
| 1416987_at   | Elp4          | elongation protein 4 homolog ( <i>S. cerevisiae</i> )                                        | NM_023876 | 4.6674  | 5.8114  | -1.1439 |
| 1430421_a_at | Tmem205       | transmembrane protein 205                                                                    | AK003909  | 8.7039  | 9.8479  | -1.1439 |
| 1421959_s_at | Adcy3         | adenylate cyclase 3                                                                          | AF458089  | 5.4580  | 6.6020  | -1.1439 |
| 1427970_at   | Zfp689        | zinc finger protein 689                                                                      | AV226931  | 4.9195  | 6.0634  | -1.1439 |
| 1425067_at   | Celsr3        | cadherin, EGF LAG seven-pass G-type receptor 3 (flamingo homolog, <i>Drosophila</i> )        | AF427498  | 4.9337  | 6.0777  | -1.1440 |
| 1428222_at   | Dclk2         | doublecortin-like kinase 2                                                                   | AK018179  | 5.7246  | 6.8688  | -1.1442 |
| 1421352_at   | Tlr6          | toll-like receptor 6                                                                         | NM_011604 | 5.7245  | 6.8688  | -1.1443 |
| 1429790_at   | Celf6         | CUGBP, Elav-like family member 6                                                             | AK018246  | 4.3328  | 5.4771  | -1.1443 |
| 1434455_at   | Fbxo44        | F-box protein 44                                                                             | AV174662  | 6.4242  | 7.5689  | -1.1447 |
| 1452067_at   | Naaa          | N-acylethanolamine acid amidase                                                              | BI106821  | 8.2762  | 9.4211  | -1.1449 |
| 1426696_at   | Lrpap1        | low density lipoprotein receptor-related protein associated protein 1                        | D00622    | 7.9631  | 9.1082  | -1.1451 |
| 1455771_at   | Bzrap1        | benzodiazepine receptor associated protein 1                                                 | BB467799  | 4.1823  | 5.3276  | -1.1453 |
| 1428132_at   | Cdc42se1      | CDC42 small effector 1                                                                       | AK008084  | 7.0292  | 8.1747  | -1.1455 |
| 1453049_at   | Svip          | small VCP/p97-interacting protein                                                            | BF011349  | 4.1953  | 5.3414  | -1.1461 |
| 1422673_at   | Prkd1         | protein kinase D1                                                                            | NM_008858 | 5.6110  | 6.7577  | -1.1466 |
| 1447520_at   | Lbp           | lipopolysaccharide binding protein                                                           | AW208574  | 4.8436  | 5.9908  | -1.1471 |
| 1427174_at   |               |                                                                                              | BM235840  | 6.4787  | 7.6260  | -1.1473 |
| 1441912_x_at | C2            | complement component 2 (within H-2S)                                                         | AV290571  | 6.4285  | 7.5765  | -1.1480 |
| 1422780_at   | Pxmp4         | peroxisomal membrane protein 4                                                               | NM_021534 | 7.0077  | 8.1559  | -1.1482 |
| 1452661_at   | Tfr           | transferrin receptor                                                                         | AK011596  | 9.3554  | 10.5039 | -1.1485 |
| 1429152_at   | Zkscan1       | zinc finger with KRAB and SCAN domains 1                                                     | A1509716  | 7.3692  | 8.5178  | -1.1486 |
| 1456176_x_at | Slc25a39      | solute carrier family 25, member 39                                                          | AV209793  | 10.2049 | 11.3537 | -1.1488 |
| 1426401_at   | Ppp3ca        | protein phosphatase 3, catalytic subunit, alpha isoform                                      | BQ173889  | 9.8630  | 11.0121 | -1.1491 |
| 1428498_at   | Rnf219        | ring finger protein 219                                                                      | AK011896  | 8.0327  | 9.1821  | -1.1493 |
| 1453058_at   | Wdr5b         | WD repeat domain 5B                                                                          | AK009247  | 4.9681  | 6.1180  | -1.1499 |
| 1428738_a_at | D14Ert449e    | DNA segment, Chr 14, ERATO Doi 449, expressed                                                | BG072279  | 6.0343  | 7.1845  | -1.1502 |
| 1457679_at   | Dclre1c       | DNA cross-link repair 1C, PSO2 homolog ( <i>S. cerevisiae</i> )                              | BB198448  | 4.0409  | 5.1918  | -1.1509 |
| 1448888_at   | Ppp1r7        | protein phosphatase 1, regulatory (inhibitor) subunit 7                                      | NM_023200 | 7.0755  | 8.2266  | -1.1511 |
| 1426013_s_at | Plekha4       | pleckstrin homology domain containing, family A (phosphoinositide binding specific) member 4 | BC024961  | 5.8632  | 7.0143  | -1.1512 |
| 1448309_at   | Ap3m1         | adaptor-related protein complex 3, mu 1 subunit                                              | AF242857  | 6.6564  | 7.8077  | -1.1513 |
| 1433320_at   | 4930519N06Rik | RIKEN cDNA 4930519N06 gene                                                                   | AK015846  | 4.7207  | 5.8736  | -1.1529 |
| 1429136_at   | 1700052K11Rik | RIKEN cDNA 1700052K11 gene                                                                   | AK006771  | 5.2013  | 6.3554  | -1.1541 |
| 1453108_at   | Arsk          | arylsulfatase K                                                                              | AK013194  | 5.8632  | 7.0173  | -1.1541 |
| 1452015_at   | 6330416G13Rik | RIKEN cDNA 6330416G13 gene                                                                   | AV326978  | 5.1833  | 6.3376  | -1.1543 |
| 1419915_at   | Nus1          | nuclear undecaprenyl pyrophosphate synthase 1 homolog ( <i>S. cerevisiae</i> )               | AW538011  | 5.1786  | 6.3332  | -1.1546 |
| 1439396_x_at | Gpd1          | glycerol-3-phosphate dehydrogenase 1 (soluble)                                               | BB503189  | 4.4563  | 5.6110  | -1.1547 |
| 1447100_s_at | 5730508B09Rik | RIKEN cDNA 5730508B09 gene                                                                   | C80506    | 6.3376  | 7.4927  | -1.1551 |
| 1455446_x_at | Acadsb        | acyl-Coenzyme A dehydrogenase, short/branched chain                                          | BF228057  | 7.3624  | 8.5178  | -1.1555 |
| 1435525_at   | Kctd17        | potassium channel tetramerisation domain containing 17                                       | BI408602  | 8.6720  | 9.8276  | -1.1556 |
| 1460331_at   | Tm9sf2        | transmembrane 9 superfamily member 2                                                         | BB747462  | 9.8369  | 10.9926 | -1.1557 |
| 1460194_at   | Phyh          | phytanoyl-CoA hydroxylase                                                                    | NM_010726 | 6.8875  | 8.0436  | -1.1561 |
| 1426628_at   | Tmem184c      | transmembrane protein 184C                                                                   | BB431503  | 9.0490  | 10.2056 | -1.1566 |
| 1448124_at   | Gusb          | glucuronidase, beta                                                                          | NM_010368 | 8.6505  | 9.8072  | -1.1567 |
| 1453641_at   | Bcas1         | breast carcinoma amplified sequence 1                                                        | AK020254  | 5.2685  | 6.4254  | -1.1569 |
| 1434831_a_at | Foxo3         | forkhead box O3                                                                              | BB364488  | 8.6007  | 9.7598  | -1.1591 |
| 1423106_at   | Ube2b         | ubiquitin-conjugating enzyme E2B                                                             | AK010432  | 8.9005  | 10.0596 | -1.1591 |
| 1451970_at   | Daglb         | diacylglycerol lipase, beta                                                                  | BC016105  | 4.8229  | 5.9820  | -1.1591 |
| 1424615_at   | Pgap2         | post-GPI attachment to proteins 2                                                            | BG063931  | 8.6761  | 9.8362  | -1.1601 |

|              |               |                                                                  |           |         |         |         |
|--------------|---------------|------------------------------------------------------------------|-----------|---------|---------|---------|
| 1452785_at   | 1700034H14Rik | RIKEN cDNA 1700034H14 gene                                       | AK012203  | 8.0252  | 9.1854  | -1.1602 |
| 1415964_at   | Scd1          | stearoyl-Coenzyme A desaturase 1                                 | NM_009127 | 11.1902 | 12.3504 | -1.1602 |
| 1434975_x_at | Pisd-ps3      | phosphatidylserine decarboxylase, pseudogene 3                   | AA673371  | 9.8235  | 10.9840 | -1.1605 |
| 1449947_s_at | Zfhx3         | zinc finger homeobox 3                                           | NM_007496 | 8.7754  | 9.9360  | -1.1606 |
| 1427084_a_at | Map4k5        | mitogen-activated protein kinase kinase kinase 5                 | BG067961  | 8.4834  | 9.6443  | -1.1608 |
| 1425186_at   | Lmbrd1        | LMBR1 domain containing 1                                        | BM206793  | 6.0698  | 7.2308  | -1.1610 |
| 1417723_at   | Ube2j1        | ubiquitin-conjugating enzyme E2J 1                               | NM_019586 | 9.1621  | 10.3234 | -1.1614 |
| 1430128_a_at | Reep6         | receptor accessory protein 6                                     | AK002562  | 6.2636  | 7.4251  | -1.1615 |
| 1426916_at   | Scrn3         | secernin 3                                                       | BM211317  | 7.4502  | 8.6118  | -1.1616 |
| 1452146_a_at | Cox15         | COX15 homolog, cytochrome c oxidase assembly protein (yeast)     | BC021498  | 7.6928  | 8.8562  | -1.1634 |
| 1439485_at   | Zfp608        | zinc finger protein 608                                          | AV222442  | 7.1952  | 8.3590  | -1.1638 |
| 1444108_at   | Dnajc25       | DnaJ (Hsp40) homolog, subfamily C, member 25                     | AI414004  | 6.0047  | 7.1687  | -1.1640 |
| 1449480_at   | Sap18         | Sin3-associated polypeptide 18                                   | NM_009119 | 6.0047  | 7.1687  | -1.1640 |
| 1423458_at   | Slc35a5       | solute carrier family 35, member A5                              | BB778934  | 5.1063  | 6.2707  | -1.1643 |
| 1424228_at   | Polr3h        | polymerase (RNA) III (DNA directed) polypeptide H                | AK019868  | 6.2831  | 7.4474  | -1.1643 |
| 1457367_at   |               |                                                                  | BB667309  | 4.1035  | 5.2685  | -1.1650 |
| 1436456_at   | Slc38a9       | solute carrier family 38, member 9                               | BQ031896  | 4.7725  | 5.9379  | -1.1654 |
| 1424371_at   | Psmf1         | proteasome (prosome, macropain) inhibitor subunit 1              | BC012260  | 4.7965  | 5.9620  | -1.1655 |
| 1424213_at   | Ubiad1        | UbiA prenyltransferase domain containing 1                       | BC015303  | 6.6949  | 7.8607  | -1.1658 |
| 1445160_at   | Nav3          | neuron navigator 3                                               | BB639193  | 4.9195  | 6.0860  | -1.1666 |
| 1454885_at   | Zfp141        | zinc finger protein 141                                          | BM211194  | 5.3443  | 6.5111  | -1.1668 |
| 1456702_x_at | Mat2a         | methionine adenosyltransferase II, alpha                         | BB488978  | 8.9521  | 10.1190 | -1.1669 |
| 1428985_at   | Ints12        | integrator complex subunit 12                                    | AK015941  | 6.2098  | 7.3768  | -1.1670 |
| 1438418_at   | Mudeng        | MU-2/AP1M2 domain containing, death-inducing                     | BB536931  | 6.9646  | 8.1321  | -1.1675 |
| 1449910_at   |               |                                                                  | NM_029813 | 3.8568  | 5.0246  | -1.1678 |
| 1455380_at   | Pcyox1l       | prenylcysteine oxidase 1 like                                    | BB433166  | 5.6031  | 6.7709  | -1.1678 |
| 1416637_at   | Slc4a2        | solute carrier family 4 (anion exchanger), member 2              | NM_009207 | 7.1562  | 8.3244  | -1.1682 |
| 1434866_x_at | Cpt1a         | carnitine palmitoyltransferase 1a, liver                         | BB021753  | 6.1549  | 7.3238  | -1.1689 |
| 1442164_at   | Blzf1         | basic leucine zipper nuclear factor 1                            | BB016374  | 4.2074  | 5.3765  | -1.1692 |
| 1422631_at   | Ahr           | aryl-hydrocarbon receptor                                        | BE989096  | 10.0524 | 11.2217 | -1.1693 |
| 1425092_at   | Cdh10         | cadherin 10                                                      | AF183946  | 4.4414  | 5.6110  | -1.1696 |
| 1429181_at   | 1700009P17Rik | RIKEN cDNA 1700009P17 gene                                       | AK005804  | 5.8877  | 7.0575  | -1.1698 |
| 1424524_at   | Dram1         | DNA-damage regulated autophagy modulator 1                       | BC021433  | 6.3658  | 7.5356  | -1.1698 |
| 1452393_at   | Akna          | AT-hook transcription factor                                     | BB014626  | 5.3141  | 6.4845  | -1.1704 |
| 1450193_at   | Hcn1          | hyperpolarization-activated, cyclic nucleotide-gated K+ 1        | NM_010408 | 5.2017  | 6.3729  | -1.1711 |
| 1441104_at   | Myo5b         | myosin VB                                                        | BG071711  | 4.9064  | 6.0777  | -1.1713 |
| 1455669_at   | Wdr19         | WD repeat domain 19                                              | AI415371  | 6.8437  | 8.0161  | -1.1724 |
| 1418801_at   | Zkscan1       | zinc finger with KRAB and SCAN domains 1                         | NM_133906 | 8.0046  | 9.1771  | -1.1725 |
| 1454779_s_at | C230052I12Rik | RIKEN cDNA C230052I12 gene                                       | BG072034  | 6.3631  | 7.5356  | -1.1725 |
| 1460546_at   | Lgi3          | leucine-rich repeat LGI family, member 3                         | BB187947  | 5.4546  | 6.6275  | -1.1730 |
| 1426940_at   | Sidt2         | SID1 transmembrane family, member 2                              | BI412808  | 7.7833  | 8.9577  | -1.1744 |
| 1426461_at   | Ugp2          | UDP-glucose pyrophosphorylase 2                                  | AI788759  | 7.2147  | 8.3903  | -1.1756 |
| 1432216_s_at | Mpp7          | membrane protein, palmitoylated 7 (MAGUK p55 subfamily member 7) | AK012883  | 5.5194  | 6.6959  | -1.1765 |
| 1458376_at   | B930025B16Rik | RIKEN cDNA B930025B16 gene                                       | BE648536  | 6.5788  | 7.7558  | -1.1770 |
| 1460225_at   | Mrp63         | mitochondrial ribosomal protein 63                               | NM_026401 | 4.3588  | 5.5363  | -1.1775 |
| 1456624_at   | Wipi1         | WD repeat domain, phosphoinositide interacting 1                 | BI251603  | 6.1566  | 7.3343  | -1.1778 |
| 1436812_at   | Fkrp          | fukutin related protein                                          | BB763578  | 6.6090  | 7.7871  | -1.1780 |
| 1416981_at   | Foxo1         | forkhead box O1                                                  | AI462296  | 6.0777  | 7.2562  | -1.1785 |
| 1456773_at   | Nupl2         | nucleoporin like 2                                               | BB396657  | 5.3054  | 6.4845  | -1.1791 |
| 1445107_at   | A530064N14Rik | RIKEN cDNA A530064N14 gene                                       | BB221206  | 4.8969  | 6.0765  | -1.1796 |
| 1431856_a_at | C1qtnf6       | C1q and tumor necrosis factor related protein 6                  | AK012868  | 7.0755  | 8.2554  | -1.1799 |
| 1437088_at   | Sdad1         | SDA1 domain containing 1                                         | BB480041  | 7.6597  | 8.8399  | -1.1802 |
| 1422452_at   | Bag3          | BCL2-associated athanogene 3                                     | NM_013863 | 9.2112  | 10.3918 | -1.1807 |
| 1430521_s_at | Cpne8         | copine VIII                                                      | AW548480  | 7.2665  | 8.4476  | -1.1811 |
| 1437861_s_at | Prkce         | protein kinase C, epsilon                                        | BB335101  | 5.1565  | 6.3376  | -1.1811 |

|              |               |                                                                   |           |         |         |         |
|--------------|---------------|-------------------------------------------------------------------|-----------|---------|---------|---------|
| 1456329_at   | Prtg          | protogenin homolog (Gallus gallus)                                | BB130087  | 6.0278  | 7.2090  | -1.1813 |
| 1434853_x_at | Mkrn1         | makorin, ring finger protein, 1                                   | AA717142  | 8.0401  | 9.2224  | -1.1823 |
| 1450027_at   | Sdc3          | syndecan 3                                                        | BB528350  | 7.0061  | 8.1892  | -1.1831 |
| 1441831_x_at | Clcn5         | chloride channel 5                                                | BB377664  | 5.5744  | 6.7577  | -1.1833 |
| 1438976_x_at | Mat2a         | methionine adenosyltransferase II, alpha                          | BB272730  | 9.0192  | 10.2027 | -1.1835 |
| 1434471_at   | BC003331      | cDNA sequence BC003331                                            | BI660899  | 7.7316  | 8.9155  | -1.1839 |
| 1441070_at   | Gm15050       | predicted gene 15050                                              | BB660130  | 5.5091  | 6.6941  | -1.1849 |
| 1417582_s_at | Dhodh         | dihydroorotate dehydrogenase                                      | NM_020046 | 7.4124  | 8.5977  | -1.1853 |
| 1419979_s_at | Creb3         | cAMP responsive element binding protein 3                         | AU044960  | 8.6350  | 9.8210  | -1.1861 |
| 1440090_at   |               |                                                                   | BB475037  | 4.7725  | 5.9590  | -1.1865 |
| 1437365_at   | Nsun3         | NOL1/NOP2/Sun domain family member 3                              | BF682821  | 4.1035  | 5.2901  | -1.1867 |
| 1426092_a_at | Trim34a       | tripartite motif-containing 34A                                   | AF220141  | 4.1035  | 5.2905  | -1.1870 |
| 1438478_a_at | Ppp3ca        | protein phosphatase 3, catalytic subunit, alpha isoform           | AI313926  | 9.8997  | 11.0875 | -1.1878 |
| 1438630_x_at | Mat2a         | methionine adenosyltransferase II, alpha                          | AV260654  | 10.1428 | 11.3306 | -1.1878 |
| 1435902_at   | Nudt18        | nudix (nucleoside diphosphate linked moiety X)-type motif 18      | BM120193  | 7.7356  | 8.9234  | -1.1878 |
| 1449150_at   | Krba1         | KRAB-A domain containing 1                                        | NM_133922 | 5.6970  | 6.8852  | -1.1882 |
| 1454758_a_at | Tsc22d1       | TSC22 domain family, member 1                                     | AU016382  | 11.3584 | 12.5466 | -1.1882 |
| 1454772_at   | Snrnp200      | small nuclear ribonucleoprotein 200 (U5)                          | AI327392  | 6.0686  | 7.2570  | -1.1884 |
| 1438093_x_at | Dbi           | diazepam binding inhibitor                                        | BB115327  | 9.9426  | 11.1315 | -1.1889 |
| 1459896_at   | Pogk          | pogo transposable element with KRAB domain                        | AW911766  | 5.2685  | 6.4574  | -1.1889 |
| 1459151_x_at | Ifi35         | interferon-induced protein 35                                     | AW986054  | 9.1065  | 10.2962 | -1.1897 |
| 1438838_at   | B230206F22Rik | RIKEN cDNA B230206F22 gene                                        | BG141977  | 6.2957  | 7.4855  | -1.1898 |
| 1442918_at   | Nav3          | neuron navigator 3                                                | AW123147  | 5.8877  | 7.0790  | -1.1913 |
| 1436061_at   |               |                                                                   | BG092263  | 4.6127  | 5.8041  | -1.1914 |
| 1443799_at   |               |                                                                   | AV348753  | 4.6127  | 5.8041  | -1.1914 |
| 1417270_at   | Wdr12         | WD repeat domain 12                                               | NM_021312 | 6.0490  | 7.2404  | -1.1914 |
| 1418607_at   | Zkscan14      | zinc finger with KRAB and SCAN domains 14                         | NM_023322 | 5.8660  | 7.0575  | -1.1915 |
| 1426062_a_at | Casp7         | caspase 7                                                         | U67321    | 4.8719  | 6.0634  | -1.1915 |
| 1455505_at   | Gatad2a       | GATA zinc finger domain containing 2A                             | AI840824  | 7.1072  | 8.2992  | -1.1919 |
| 1418619_at   | Icam5         | intercellular adhesion molecule 5, telencephalin                  | NM_008319 | 5.8968  | 7.0897  | -1.1928 |
| 1423761_at   | Mettl13       | methyltransferase like 13                                         | BC014872  | 6.3297  | 7.5226  | -1.1929 |
| 1424497_at   | Tmem219       | transmembrane protein 219                                         | BC023442  | 7.0091  | 8.2023  | -1.1932 |
| 1430005_a_at | Batf2         | basic leucine zipper transcription factor, ATF-like 2             | AK016990  | 5.6505  | 6.8439  | -1.1935 |
| 1441806_at   |               |                                                                   | BF472844  | 4.6942  | 5.8877  | -1.1935 |
| 1452759_s_at | Ppfbp1        | PTPRF interacting protein, binding protein 1 (liprin beta 1)      | BI149999  | 9.7329  | 10.9269 | -1.1940 |
| 1449853_at   | Sfxn2         | sideroflexin 2                                                    | NM_053196 | 6.5798  | 7.7740  | -1.1942 |
| 1440994_at   | Shprh         | SNF2 histone linker PHD RING helicase                             | BB003227  | 5.5410  | 6.7353  | -1.1943 |
| 1423817_s_at | Use1          | unconventional SNARE in the ER 1 homolog (S. cerevisiae)          | AF353245  | 9.3736  | 10.5682 | -1.1946 |
| 1418670_s_at | Hspg2         | perlecan (heparan sulfate proteoglycan 2)                         | NM_008305 | 7.8384  | 9.0331  | -1.1947 |
| 1441664_at   | AW049021      | expressed sequence AW049021                                       | BB375185  | 5.6615  | 6.8564  | -1.1950 |
| 1428443_a_at | Rap1gap       | Rap1 GTPase-activating protein                                    | AK005063  | 6.9835  | 8.1788  | -1.1953 |
| 1435278_at   | Sft2d3        | SFT2 domain containing 3                                          | BE688374  | 4.6674  | 5.8632  | -1.1957 |
| 1418888_a_at | Sepx1         | selenoprotein X 1                                                 | NM_013759 | 7.9861  | 9.1821  | -1.1960 |
| 1437898_at   |               |                                                                   | BB668056  | 4.7151  | 5.9119  | -1.1967 |
| 1455991_at   | Ccbl2         | cysteine conjugate-beta lyase 2                                   | BG094881  | 6.4242  | 7.6211  | -1.1970 |
| 1455816_a_at | Kctd3         | potassium channel tetramerisation domain containing 3             | BB321232  | 9.9626  | 11.1596 | -1.1970 |
| 1450034_at   | Stat1         | signal transducer and activator of transcription 1                | AW214029  | 9.5860  | 10.7834 | -1.1975 |
| 1434677_at   | Hps5          | Hermansky-Pudlak syndrome 5 homolog (human)                       | BG067097  | 6.3733  | 7.5708  | -1.1975 |
| 1457265_at   | Akap17b       | A kinase (PRKA) anchor protein 17B                                | BG063043  | 6.0489  | 7.2467  | -1.1978 |
| 1449618_s_at | 2900092E17Rik | RIKEN cDNA 2900092E17 gene                                        | C77040    | 8.5845  | 9.7828  | -1.1983 |
| 1447880_x_at | S1pr2         | sphingosine-1-phosphate receptor 2                                | AV310929  | 7.1079  | 8.3063  | -1.1984 |
| 1423751_at   | Sf1           | splicing factor 1                                                 | BC009091  | 5.6402  | 6.8392  | -1.1990 |
| 1436360_at   | Zscan22       | zinc finger and SCAN domain containing 22                         | BB811893  | 6.2398  | 7.4409  | -1.2010 |
| 1424413_at   | Ogfr1         | opioid growth factor receptor-like 1                              | BE650508  | 4.5722  | 5.7741  | -1.2019 |
| 1453953_at   | 9130015A21Rik | RIKEN cDNA 9130015A21 gene                                        | AK018624  | 6.6152  | 7.8173  | -1.2020 |
| 1429583_at   | 2900053A13Rik | RIKEN cDNA 2900053A13 gene                                        | BE865033  | 4.3588  | 5.5610  | -1.2022 |
| 1453997_a_at | Nes           | nestin                                                            | AK012622  | 5.4777  | 6.6801  | -1.2024 |
| 1434864_at   | Nipa1         | non imprinted in Prader-Willi/Angelman syndrome 1 homolog (human) | BB326329  | 7.0503  | 8.2527  | -1.2024 |

|              |               |                                                                                                                  |           |         |         |         |
|--------------|---------------|------------------------------------------------------------------------------------------------------------------|-----------|---------|---------|---------|
| 1455352_at   | U2surp        | U2 snRNP-associated SURP domain containing                                                                       | AV340615  | 6.9948  | 8.1974  | -1.2026 |
| 1417062_at   | Armc10        | armadillo repeat containing 10                                                                                   | NM_026034 | 8.8221  | 10.0250 | -1.2029 |
| 1429050_at   | Chic2         | cysteine-rich hydrophobic domain 2                                                                               | AK015681  | 8.2314  | 9.4343  | -1.2029 |
| 1418996_a_at | Lym5          | LYR motif containing 5                                                                                           | BC021522  | 8.2940  | 9.4981  | -1.2040 |
| 1455440_at   | Clcn6         | chloride channel 6                                                                                               | BI739597  | 7.1000  | 8.3041  | -1.2041 |
| 1454158_at   | Mpp7          | membrane protein, palmitoylated 7 (MAGUK p55 subfamily member 7)                                                 | AK012883  | 6.1813  | 7.3860  | -1.2047 |
| 1426387_x_at |               |                                                                                                                  | BB085906  | 9.6472  | 10.8521 | -1.2049 |
| 1423610_at   | Metap2        | methionine aminopeptidase 2                                                                                      | BG086961  | 10.3522 | 11.5573 | -1.2050 |
| 1429360_at   | Klf3          | Kruppel-like factor 3 (basic)                                                                                    | AK007959  | 6.8852  | 8.0903  | -1.2051 |
| 1428306_at   | Ddit4         | DNA-damage-inducible transcript 4                                                                                | AK017926  | 10.7550 | 11.9601 | -1.2052 |
| 1451782_a_at | Slc29a1       | solute carrier family 29 (nucleoside transporters), member 1                                                     | AF305501  | 7.6900  | 8.8954  | -1.2054 |
| 1426856_at   | Hsd12         | hydroxysteroid dehydrogenase like 2                                                                              | BM200015  | 6.1941  | 7.3998  | -1.2057 |
| 1450484_a_at | Cmpk2         | cytidine monophosphate (UMP-CMP) kinase 2, mitochondrial                                                         | AK004595  | 8.3184  | 9.5253  | -1.2069 |
| 1422217_a_at | Cyp1a1        | cytochrome P450, family 1, subfamily a, polypeptide 1                                                            | NM_009992 | 4.2038  | 5.4108  | -1.2070 |
| 1433920_at   | Sema4c        | sema domain, immunoglobulin domain (Ig), transmembrane domain (TM) and short cytoplasmic domain, (semaphorin) 4C | BQ032843  | 7.7111  | 8.9187  | -1.2076 |
| 1428180_at   | 2810422J05Rik | RIKEN cDNA 2810422J05 gene                                                                                       | AK013135  | 8.2074  | 9.4151  | -1.2077 |
| 1416332_at   | Cirbp         | cold inducible RNA binding protein                                                                               | NM_007705 | 7.2562  | 8.4645  | -1.2083 |
| 1431190_x_at | Fahd2a        | fumarylacetoacetate hydrolase domain containing 2A                                                               | BI872590  | 6.6479  | 7.8572  | -1.2093 |
| 1449047_at   | Hac1          | 2-hydroxyacyl-CoA lyase 1                                                                                        | NM_019975 | 7.0755  | 8.2848  | -1.2093 |
| 1431084_x_at | 1810014B01Rik | RIKEN cDNA 1810014B01 gene                                                                                       | AK012122  | 4.3570  | 5.5665  | -1.2095 |
| 1449509_at   | Serf1         | small EDRK-rich factor 1                                                                                         | NM_011353 | 7.4325  | 8.6424  | -1.2100 |
| 1418714_at   | Dusp8         | dual specificity phosphatase 8                                                                                   | NM_008748 | 5.8041  | 7.0152  | -1.2110 |
| 1434398_at   | Nkrf          | NF-kappaB repressing factor                                                                                      | BB396674  | 7.9578  | 9.1690  | -1.2111 |
| 1439780_at   | Rpl71         | ribosomal protein L7-like 1                                                                                      | BG071958  | 6.7532  | 7.9645  | -1.2113 |
| 1435089_at   | 2010111I01Rik | RIKEN cDNA 2010111I01 gene                                                                                       | BI157086  | 7.1741  | 8.3860  | -1.2119 |
| 1436118_at   | Vangl2        | vang-like 2 (van gogh, Drosophila)                                                                               | BB417279  | 5.8877  | 7.1002  | -1.2125 |
| 1417522_at   | Fbxo32        | F-box protein 32                                                                                                 | AF441120  | 5.9820  | 7.1952  | -1.2131 |
| 1449334_at   | Timp3         | tissue inhibitor of metalloproteinase 3                                                                          | BI111620  | 7.5874  | 8.8005  | -1.2131 |
| 1423806_at   | Ints4         | integrator complex subunit 4                                                                                     | BC013813  | 7.5278  | 8.7410  | -1.2132 |
| 1426210_x_at | Parp3         | poly (ADP-ribose) polymerase family, member 3                                                                    | BC014870  | 8.0672  | 9.2805  | -1.2133 |
| 1424987_at   | 5430435G22Rik | RIKEN cDNA 5430435G22 gene                                                                                       | BB128517  | 8.5770  | 9.7904  | -1.2135 |
| 1452152_at   | Clint1        | clathrin interactor 1                                                                                            | AW537616  | 10.7018 | 11.9156 | -1.2138 |
| 1450163_a_at | Wrn           | Werner syndrome homolog (human)                                                                                  | D86527    | 6.0777  | 7.2919  | -1.2142 |
| 1426347_at   | 2010321M09Rik | RIKEN cDNA 2010321M09 gene                                                                                       | BM120802  | 8.0956  | 9.3103  | -1.2147 |
| 1437599_at   |               |                                                                                                                  | BM246546  | 3.9632  | 5.1780  | -1.2148 |
| 1439727_at   | Clca6         | chloride channel calcium activated 6                                                                             | AV375098  | 4.7207  | 5.9357  | -1.2150 |
| 1434745_at   | Ccnd2         | cyclin D2                                                                                                        | BQ175880  | 10.3661 | 11.5811 | -1.2150 |
| 1448698_at   | Ccnd1         | cyclin D1                                                                                                        | NM_007631 | 11.4920 | 12.7079 | -1.2160 |
| 1433487_at   | Clcn3         | chloride channel 3                                                                                               | BI739053  | 6.5578  | 7.7740  | -1.2162 |
| 1417136_s_at | Srpk2         | serine/arginine-rich protein specific kinase 2                                                                   | NM_009274 | 9.0367  | 10.2533 | -1.2166 |
| 1450847_at   | Ncbp2         | nuclear cap binding protein subunit 2                                                                            | BE285362  | 8.2709  | 9.4876  | -1.2167 |
| 1429940_at   | Cdc73         | cell division cycle 73, Paf1/RNA polymerase II complex component                                                 | BM935271  | 6.3020  | 7.5192  | -1.2173 |
| 1458161_at   | Kcnq1ot1      | KCNQ1 overlapping transcript 1                                                                                   | BM248551  | 5.8393  | 7.0575  | -1.2183 |
| 1427907_at   | 1110037F02Rik | RIKEN cDNA 1110037F02 gene                                                                                       | AK012768  | 7.6056  | 8.8240  | -1.2184 |
| 1449181_at   | Fech          | ferrochelatase                                                                                                   | NM_007998 | 8.5987  | 9.8178  | -1.2192 |
| 1460295_s_at | Il6st         | interleukin 6 signal transducer                                                                                  | AA717838  | 5.2957  | 6.5150  | -1.2193 |
| 1434039_at   | Appbp2        | amyloid beta precursor protein (cytoplasmic tail) binding protein 2                                              | BB553604  | 7.8600  | 9.0798  | -1.2198 |
| 1420772_a_at | Tsc22d3       | TSC22 domain family, member 3                                                                                    | NM_010286 | 8.3585  | 9.5785  | -1.2200 |
| 1426833_at   | Eif4g3        | eukaryotic translation initiation factor 4 gamma,                                                                | BG073769  | 8.2096  | 9.4300  | -1.2204 |
| 1416950_at   | Tnfaip8       | tumor necrosis factor, alpha-induced protein 8                                                                   | NM_134131 | 9.2353  | 10.4569 | -1.2216 |
| 1432590_at   | 4930573O21Rik | RIKEN cDNA 4930573O21 gene                                                                                       | AW912387  | 3.9701  | 5.1918  | -1.2217 |
| 1457625_s_at | Cdkl2         | cyclin-dependent kinase-like 2 (CDC2-related kinase)                                                             | BE979937  | 4.8772  | 6.0989  | -1.2217 |
| 1431416_a_at | Jam2          | junction adhesion molecule 2                                                                                     | AK010826  | 3.8345  | 5.0562  | -1.2217 |
| 1416935_at   | Trpv2         | transient receptor potential cation channel, subfamily V, member 2                                               | NM_011706 | 5.7819  | 7.0061  | -1.2242 |

|              |               |                                                                   |           |        |         |         |
|--------------|---------------|-------------------------------------------------------------------|-----------|--------|---------|---------|
| 1424918_at   | Tbc1d19       | TBC1 domain family, member 19                                     | BC020138  | 8.0903 | 9.3148  | -1.2244 |
| 1416016_at   |               |                                                                   | AW048052  | 8.4613 | 9.6863  | -1.2250 |
| 1438410_at   | Prtg          | protogenin homolog (Gallus gallus)                                | BB295128  | 5.5740 | 6.8000  | -1.2261 |
| 1448985_at   | Dusp22        | dual specificity phosphatase 22                                   | NM_134068 | 6.5593 | 7.7859  | -1.2266 |
| 1449585_at   | Il1rap        | interleukin 1 receptor accessory protein                          | NM_134103 | 6.8186 | 8.0455  | -1.2269 |
| 1438081_at   | Mcc           | mutated in colorectal cancers                                     | BB794635  | 7.8087 | 9.0357  | -1.2270 |
| 1428446_at   | Dync2li1      | dynein cytoplasmic 2 light intermediate chain 1                   | AK008822  | 8.6837 | 9.9118  | -1.2281 |
| 1435586_at   | Pcid2         | PCI domain containing 2                                           | BB309550  | 7.6668 | 8.8951  | -1.2283 |
| 1438610_a_at | Cryz          | crystallin, zeta                                                  | BB793369  | 9.2560 | 10.4846 | -1.2286 |
| 1434404_at   | Fam73a        | family with sequence similarity 73, member A                      | BB375245  | 5.9648 | 7.1942  | -1.2294 |
| 1441917_s_at | Tmem40        | transmembrane protein 40                                          | BB468188  | 6.0265 | 7.2562  | -1.2298 |
| 1416374_at   | Ap3m1         | adaptor-related protein complex 3, mu 1 subunit                   | AF242857  | 7.0061 | 8.2362  | -1.2301 |
| 1424616_s_at | Pgap2         | post-GPI attachment to proteins 2                                 | BG063931  | 8.1909 | 9.4211  | -1.2302 |
| 1446380_at   | 9430076C15Rik | RIKEN cDNA 9430076C15 gene                                        | BB101151  | 4.0372 | 5.2685  | -1.2313 |
| 1460192_at   | Osbp1a        | oxysterol binding protein-like 1A                                 | NM_020573 | 7.9198 | 9.1528  | -1.2330 |
| 1416820_at   | Cdc37         | cell division cycle 37                                            | AK013255  | 6.0777 | 7.3117  | -1.2340 |
| 1434755_at   | Coro2b        | coronin, actin binding protein, 2B                                | BB538661  | 6.0777 | 7.3117  | -1.2340 |
| 1439105_at   | Cdad1         | cytidine and dCMP deaminase domain containing 1                   | BE200391  | 5.1383 | 6.3729  | -1.2345 |
| 1449583_at   | Pcdhb20       | protocadherin beta 20                                             | NM_053145 | 4.2096 | 5.4443  | -1.2347 |
| 1431792_a_at | Stk11ip       | serine/threonine kinase 11 interacting protein                    | AK004757  | 5.7945 | 7.0296  | -1.2351 |
| 1420123_at   | Tcta          | T cell leukemia translocation altered gene                        | C85065    | 6.3902 | 7.6260  | -1.2358 |
| 1437350_at   |               |                                                                   | AV290046  | 5.6970 | 6.9332  | -1.2362 |
| 1432158_a_at | Trappc2       | trafficking protein particle complex 2                            | AK007951  | 9.2108 | 10.4473 | -1.2365 |
| 1418817_at   | Chmp1b        | charged multivesicular body protein 1B                            | BG073376  | 8.1114 | 9.3481  | -1.2367 |
| 1435220_s_at | Cdc42se2      | CDC42 small effector 2                                            | AV226461  | 9.1281 | 10.3651 | -1.2370 |
| 1417570_at   | Anapc1        | anaphase promoting complex subunit 1                              | NM_008569 | 5.4334 | 6.6707  | -1.2372 |
| 1459840_s_at | Ccdc28b       | coiled coil domain containing 28B                                 | AV365721  | 5.1786 | 6.4170  | -1.2384 |
| 1452843_at   | Il6st         | interleukin 6 signal transducer                                   | AK017211  | 8.7126 | 9.9516  | -1.2390 |
| 1445436_at   | Szt2          | seizure threshold 2                                               | AV175285  | 5.8112 | 7.0503  | -1.2391 |
| 1416790_a_at |               |                                                                   | NM_011561 | 9.2828 | 10.5231 | -1.2403 |
| 1437982_x_at | Cox15         | COX15 homolog, cytochrome c oxidase assembly protein (yeast)      | BB736240  | 7.6454 | 8.8863  | -1.2410 |
| 1425463_at   | Gata6         | GATA binding protein 6                                            | BM214048  | 4.9758 | 6.2171  | -1.2412 |
| 1456795_at   | Bend4         | BEN domain containing 4                                           | BB449568  | 7.8586 | 9.1012  | -1.2426 |
| 1452384_at   | Enpp3         | ectonucleotide pyrophosphatase/phosphodiesterase 3                | AV224446  | 5.1603 | 6.4030  | -1.2427 |
| 1449249_at   | Pcdh7         | protocadherin 7                                                   | NM_018764 | 5.4276 | 6.6707  | -1.2431 |
| 1433559_at   | Slc45a4       | solute carrier family 45, member 4                                | BB811412  | 8.0327 | 9.2758  | -1.2431 |
| 1451848_a_at | Cryz          | crystallin, zeta                                                  | BC003800  | 7.9861 | 9.2293  | -1.2432 |
| 1447783_x_at | Slc25a39      | solute carrier family 25, member 39                               | BB514802  | 8.0250 | 9.2688  | -1.2438 |
| 1423614_at   | Lrrc8c        | leucine rich repeat containing 8 family, member C                 | BB329408  | 8.8272 | 10.0717 | -1.2445 |
| 1437071_at   | Eif1ax        | eukaryotic translation initiation factor 1A, X-linked             | BB471576  | 7.1334 | 8.3788  | -1.2454 |
| 1437774_at   | 1700020I14Rik | RIKEN cDNA 1700020I14 gene                                        | BB778614  | 5.7186 | 6.9643  | -1.2457 |
| 1424740_at   | Creb3         | cAMP responsive element binding protein 3                         | BG070002  | 7.4856 | 8.7315  | -1.2458 |
| 1425679_a_at | Mapk8ip1      | mitogen-activated protein kinase 8 interacting protein 1          | AF109769  | 5.9590 | 7.2050  | -1.2459 |
| 1419400_at   | Mttp          | microsomal triglyceride transfer protein                          | AW553649  | 4.3474 | 5.5935  | -1.2461 |
| 1452937_s_at | Ccdc28b       | coiled coil domain containing 28B                                 | BQ031123  | 5.1786 | 6.4253  | -1.2467 |
| 1455656_at   | Btla          | B and T lymphocyte associated                                     | BM240873  | 3.7635 | 5.0107  | -1.2472 |
| 1448398_s_at | Rpl22         | ribosomal protein L22                                             | NM_009079 | 9.1460 | 10.3934 | -1.2473 |
| 1420915_at   | Stat1         | signal transducer and activator of transcription 1                | AW214029  | 8.1646 | 9.4120  | -1.2474 |
| 1422930_at   | Icam4         | intercellular adhesion molecule 4, Landsteiner-Wiener blood group | NM_023892 | 5.0107 | 6.2582  | -1.2475 |
| 1428289_at   | Klf9          | Kruppel-like factor 9                                             | AW488885  | 9.0454 | 10.2931 | -1.2477 |
| 1416878_at   | Mrpl51        | mitochondrial ribosomal protein L51                               | A1594880  | 5.3054 | 6.5537  | -1.2483 |
| 1452949_at   | Polr3b        | polymerase (RNA) III (DNA directed) polypeptide B                 | AK012532  | 5.8297 | 7.0790  | -1.2493 |
| 1450729_at   | Hs2st1        | heparan sulfate 2-O-sulfotransferase 1                            | AV346600  | 9.1216 | 10.3716 | -1.2501 |
| 1416083_at   | Zfand5        | zinc finger, AN1-type domain 5                                    | AA124553  | 9.7937 | 11.0440 | -1.2503 |
| 1424575_at   | Rab15         | RAB, member of RAS oncogene family-like 5                         | BC009150  | 7.9141 | 9.1654  | -1.2512 |
| 1434630_at   | Ankrd28       | ankyrin repeat domain 28                                          | AV261293  | 7.9993 | 9.2516  | -1.2523 |
| 1429212_a_at | Lrrc51        | leucine rich repeat containing 51                                 | AK005758  | 5.4040 | 6.6564  | -1.2525 |
| 1436210_at   | Gk5           | glycerol kinase 5 (putative)                                      | AV095337  | 5.6689 | 6.9213  | -1.2525 |

|              |               |                                                                                        |           |        |         |         |
|--------------|---------------|----------------------------------------------------------------------------------------|-----------|--------|---------|---------|
| 1416623_at   | Thbs3         | thrombospondin 3                                                                       | NM_013691 | 6.3461 | 7.5990  | -1.2529 |
| 1428714_at   | Pgrmc2        | progesterone receptor membrane component 2                                             | BF322962  | 9.5595 | 10.8129 | -1.2534 |
| 1418491_a_at | Pus3          | pseudouridine synthase 3                                                               | NM_023292 | 6.4574 | 7.7111  | -1.2537 |
| 1452005_at   | Dlat          | dihydrolipoamide S-acetyltransferase (E2 component of pyruvate dehydrogenase complex)  | AV336908  | 6.8057 | 8.0618  | -1.2561 |
| 1417135_at   | Srpk2         | serine/arginine-rich protein specific kinase 2                                         | NM_009274 | 9.4836 | 10.7402 | -1.2567 |
| 1442148_at   | Psip1         | PC4 and SFRS1 interacting protein 1                                                    | BB074968  | 7.7902 | 9.0477  | -1.2574 |
| 1427063_at   | 5330417C22Rik | RIKEN cDNA 5330417C22 gene                                                             | AK017241  | 4.4184 | 5.6763  | -1.2579 |
| 1437000_at   | Dgkq          | diacylglycerol kinase, theta                                                           | BB818538  | 6.4353 | 7.6933  | -1.2579 |
| 1416022_at   | Fabp5         | fatty acid binding protein 5, epidermal                                                | BC002008  | 9.5803 | 10.8384 | -1.2581 |
| 1427953_at   | Fanci         | Fanconi anemia, complementation group I                                                | BM249388  | 7.8384 | 9.0966  | -1.2582 |
| 1415932_x_at | Atp9a         | ATPase, class II, type 9A                                                              | NM_015731 | 5.4769 | 6.7353  | -1.2583 |
| 1441961_at   | Mtap9         | microtubule-associated protein 9                                                       | BB698742  | 5.0970 | 6.3554  | -1.2584 |
| 1456597_at   | Heatr3        | HEAT repeat containing 3                                                               | AV324623  | 7.6683 | 8.9267  | -1.2584 |
| 1447816_x_at | Oxnad1        | oxidoreductase NAD-binding domain containing 1                                         | BB059395  | 7.5050 | 8.7635  | -1.2584 |
| 1433859_at   | Ino80c        | INO80 complex subunit C                                                                | BB207820  | 7.0011 | 8.2614  | -1.2604 |
| 1441811_x_at | Tmem176a      | transmembrane protein 176A                                                             | AU040201  | 8.0672 | 9.3276  | -1.2604 |
| 1428115_a_at | Rab2b         | RAB2B, member RAS oncogene family                                                      | AK005230  | 6.0989 | 7.3594  | -1.2605 |
| 1419810_x_at | Arhgap9       | Rho GTPase activating protein 9                                                        | AU043488  | 3.9701 | 5.2306  | -1.2605 |
| 1460725_at   | Xpa           | xeroderma pigmentosum, complementation group A                                         | NM_011728 | 7.1338 | 8.3946  | -1.2609 |
| 1440699_at   | Mtap2         | microtubule-associated protein 2                                                       | BB189640  | 4.9195 | 6.1807  | -1.2613 |
| 1420984_at   | Pctp          | phosphatidylcholine transfer protein                                                   | AF114437  | 4.7207 | 5.9820  | -1.2613 |
| 1422952_at   | Ng23          | Ng23 protein                                                                           | NM_023893 | 5.9789 | 7.2404  | -1.2615 |
| 1446877_at   | C230014O12Rik | RIKEN cDNA C230014O12 gene                                                             | BB381622  | 3.8342 | 5.0970  | -1.2627 |
| 1421848_at   | Slc22a5       | solute carrier family 22 (organic cation transporter), member 5                        | NM_011396 | 3.7916 | 5.0544  | -1.2629 |
| 1423315_at   | Bbc3          | BCL2 binding component 3                                                               | AW489168  | 6.6814 | 7.9457  | -1.2643 |
| 1434117_at   | Tceb3         | transcription elongation factor B (SIII), polypeptide 3                                | AV264059  | 7.5295 | 8.7940  | -1.2645 |
| 1437338_x_at | Elp3          | elongator acetyltransferase complex subunit 3                                          | BB172662  | 8.0247 | 9.2897  | -1.2651 |
| 1420630_at   | 8430419L09Rik | RIKEN cDNA 8430419L09 gene                                                             | NM_028982 | 6.2200 | 7.4855  | -1.2655 |
| 1417590_at   | Cyp27a1       | cytochrome P450, family 27, subfamily a, polypeptide 1                                 | NM_024264 | 5.3433 | 6.6088  | -1.2655 |
| 1448200_at   | Tcn2          | transcobalamin 2                                                                       | NM_015749 | 7.3862 | 8.6532  | -1.2670 |
| 1427505_a_at | Cradd         | CASP2 and RIPK1 domain containing adaptor with death domain                            | AJ224740  | 5.5091 | 6.7766  | -1.2675 |
| 1427145_at   | lqsec1        | IQ motif and Sec7 domain 1                                                             | BF164393  | 6.2831 | 7.5511  | -1.2680 |
| 1447987_at   | Letm2         | leucine zipper-EF-hand containing transmembrane protein 2                              | BB443603  | 4.6674 | 5.9357  | -1.2682 |
| 1424383_at   | Tmem51        | transmembrane protein 51                                                               | BC003277  | 4.4833 | 5.7515  | -1.2682 |
| 1456770_at   | Zfp14         | zinc finger protein 14                                                                 | BF730189  | 4.2303 | 5.4985  | -1.2682 |
| 1416798_a_at | Nme4          | NME/NM23 nucleoside diphosphate kinase 4                                               | NM_019731 | 6.6177 | 7.8862  | -1.2685 |
| 1449641_at   | Adk           | adenosine kinase                                                                       | AI508733  | 4.4283 | 5.6970  | -1.2687 |
| 1431795_a_at | Sema3b        | sema domain, immunoglobulin domain (Ig), short basic domain, secreted, (semaphorin) 3B | AK014333  | 5.1383 | 6.4073  | -1.2689 |
| 1456510_x_at |               |                                                                                        | BB703414  | 5.1383 | 6.4073  | -1.2689 |
| 1417408_at   | F3            | coagulation factor III                                                                 | BC024886  | 8.9680 | 10.2372 | -1.2692 |
| 1423045_at   | Ncbp2         | nuclear cap binding protein subunit 2                                                  | BE285362  | 8.0327 | 9.3031  | -1.2704 |
| 1447800_x_at | Tcn2          | transcobalamin 2                                                                       | AV085634  | 9.2211 | 10.4917 | -1.2706 |
| 1437050_s_at | Angel2        | angel homolog 2 (Drosophila)                                                           | AV330655  | 7.5434 | 8.8144  | -1.2711 |
| 1417292_at   | Ifi47         | interferon gamma inducible protein 47                                                  | NM_008330 | 8.6905 | 9.9618  | -1.2712 |
| 1426417_at   | Yip4          | Yip1 domain family, member 4                                                           | AV216410  | 6.0873 | 7.3594  | -1.2721 |
| 1435829_at   | Zmat1         | zinc finger, matrin type 1                                                             | BM242273  | 5.8757 | 7.1485  | -1.2728 |
| 1423007_a_at | Gfra2         | glial cell line derived neurotrophic factor family receptor alpha 2                    | NM_008115 | 4.9657 | 6.2392  | -1.2735 |
| 1419064_a_at | Ugt8a         | UDP galactosyltransferase 8A                                                           | NM_011674 | 4.2627 | 5.5365  | -1.2737 |
| 1428598_at   | Tbc1d7        | TBC1 domain family, member 7                                                           | AK011356  | 7.5693 | 8.8436  | -1.2743 |
| 1460122_at   | Tmem41b       | transmembrane protein 41B                                                              | BB734748  | 6.4367 | 7.7111  | -1.2744 |
| 1448360_s_at | Angel2        | angel homolog 2 (Drosophila)                                                           | NM_021421 | 7.2562 | 8.5309  | -1.2747 |
| 1427954_at   | BC048403      | cDNA sequence BC048403                                                                 | BC028785  | 5.1199 | 6.3947  | -1.2748 |
| 1430650_at   | Zfp191        | zinc finger protein 191                                                                | AI504586  | 6.2005 | 7.4754  | -1.2749 |
| 1434480_at   | Pdpr          | pyruvate dehydrogenase phosphatase regulatory subunit                                  | BB667201  | 7.5483 | 8.8240  | -1.2758 |



|              |               |                                                                                         |           |        |         |         |
|--------------|---------------|-----------------------------------------------------------------------------------------|-----------|--------|---------|---------|
| 1431007_at   | Gm3435        | predicted gene 3435                                                                     | AA153045  | 7.4683 | 8.7444  | -1.2761 |
| 1421402_at   | Mta3          | metastasis associated 3                                                                 | NM_054082 | 6.3902 | 7.6668  | -1.2766 |
| 1434832_at   | Foxo3         | forkhead box O3                                                                         | BB364488  | 7.0104 | 8.2875  | -1.2771 |
| 1418356_at   | Mpst          | mercaptopyruvate sulfurtransferase                                                      | NM_138670 | 8.2003 | 9.4775  | -1.2772 |
| 1448814_at   | Gab1          | growth factor receptor bound protein 2-associated protein 1                             | NM_021356 | 4.1306 | 5.4080  | -1.2774 |
| 1437393_at   | Prkca         | protein kinase C, alpha                                                                 | BB355213  | 7.3704 | 8.6482  | -1.2779 |
| 1424644_at   | Tbcc          | tubulin-specific chaperone C                                                            | AI426164  | 7.1645 | 8.4424  | -1.2779 |
| 1429079_a_at | 2310045N01Rik | RIKEN cDNA 2310045N01 gene                                                              | AK009829  | 7.8680 | 9.1460  | -1.2781 |
| 1424796_at   | 1700054N08Rik | RIKEN cDNA 1700054N08 gene                                                              | BC024705  | 6.4073 | 7.6856  | -1.2784 |
| 1436644_x_at | Tmem25        | transmembrane protein 25                                                                | BB245618  | 4.6331 | 5.9119  | -1.2788 |
| 1436811_at   | Kctd3         | potassium channel tetramerisation domain containing 3                                   | AV232970  | 8.5048 | 9.7838  | -1.2790 |
| 1454980_at   | Pdpr          | pyruvate dehydrogenase phosphatase regulatory subunit                                   | BB667201  | 7.4308 | 8.7101  | -1.2793 |
| 1417581_at   | Dhodh         | dihydroorotate dehydrogenase                                                            | NM_020046 | 6.9031 | 8.1843  | -1.2811 |
| 1425016_at   | Ephb2         | Eph receptor B2                                                                         | AV221401  | 4.6677 | 5.9492  | -1.2815 |
| 1422397_a_at | Il15ra        | interleukin 15 receptor, alpha chain                                                    | NM_008358 | 4.4965 | 5.7781  | -1.2816 |
| 1440975_at   | Mxra7         | matrix-remodelling associated 7                                                         | BB275943  | 8.2786 | 9.5605  | -1.2819 |
| 1420621_a_at | App           | amyloid beta (A4) precursor protein                                                     | NM_007471 | 9.5565 | 10.8391 | -1.2826 |
| 1424257_at   | Cdk7          | cyclin-dependent kinase 7                                                               | BC004605  | 5.0544 | 6.3376  | -1.2832 |
| 1434387_at   | Itfg3         | integrin alpha FG-GAP repeat containing 3                                               | AV251853  | 8.2667 | 9.5513  | -1.2846 |
| 1450321_at   | Zfp354c       | zinc finger protein 354C                                                                | NM_013922 | 4.2057 | 5.4903  | -1.2846 |
| 1431737_at   | Gm7008        | predicted gene 7008                                                                     | AK004585  | 3.9069 | 5.1918  | -1.2849 |
| 1419460_at   | Rpp14         | ribonuclease P 14 subunit (human)                                                       | BI455861  | 7.3594 | 8.6444  | -1.2850 |
| 1435946_at   | Sepsecs       | Sep (O-phosphoserine) tRNA:Sec (selenocysteine) tRNA synthase                           | BB401993  | 5.4718 | 6.7577  | -1.2858 |
| 1426743_at   | Appl2         | adaptor protein, phosphotyrosine interaction, PH domain and leucine zipper containing 2 | BC002232  | 9.4454 | 10.7327 | -1.2872 |
| 1428501_at   | 1110051M20Rik | RIKEN cDNA 1110051M20 gene                                                              | BQ176704  | 7.8586 | 9.1460  | -1.2874 |
| 1433838_at   | Dars2         | aspartyl-tRNA synthetase 2 (mitochondrial)                                              | BM228846  | 7.2808 | 8.5694  | -1.2886 |
| 1423295_at   | Tm9sf2        | transmembrane 9 superfamily member 2                                                    | BB747462  | 8.2773 | 9.5661  | -1.2889 |
| 1419132_at   | Tlr2          | toll-like receptor 2                                                                    | NM_011905 | 4.4791 | 5.7681  | -1.2890 |
| 1425788_a_at | Echdc2        | enoyl Coenzyme A hydratase domain containing 2                                          | BC025104  | 5.5877 | 6.8770  | -1.2893 |
| 1456830_at   | Ppp1r2        | protein phosphatase 1, regulatory (inhibitor) subunit 2                                 | BB542221  | 6.0434 | 7.3328  | -1.2894 |
| 1419465_at   | Nkd2          | naked cuticle 2 homolog (Drosophila)                                                    | BC019952  | 5.4318 | 6.7217  | -1.2899 |
| 1418563_at   | Serbp1        | serpine1 mRNA binding protein 1                                                         | BC006030  | 8.9249 | 10.2150 | -1.2901 |
| 1442397_at   | Nfx1          | nuclear transcription factor, X-box binding 1                                           | BB075045  | 6.2031 | 7.4935  | -1.2904 |
| 1453795_at   | Fahd2a        | fumarylacetoacetate hydrolase domain containing 2A                                      | BI872590  | 6.6583 | 7.9489  | -1.2906 |
| 1451604_a_at | Acvr1         | activin A receptor, type II-like 1                                                      | BC014291  | 4.3780 | 5.6689  | -1.2909 |
| 1424942_a_at | Myc           | myelocytomatosis oncogene                                                               | BC006728  | 9.6484 | 10.9407 | -1.2923 |
| 1416334_at   | Wwox          | WW domain-containing oxidoreductase                                                     | NM_019573 | 5.4690 | 6.7613  | -1.2924 |
| 1421118_a_at | Gpr56         | G protein-coupled receptor 56                                                           | NM_018882 | 4.8064 | 6.0989  | -1.2925 |
| 1442080_at   |               |                                                                                         | BI076747  | 5.9119 | 7.2045  | -1.2926 |
| 1435614_s_at | Rasgrf1       | RAS protein-specific guanine nucleotide-releasing factor 1                              | AI850720  | 5.0193 | 6.3122  | -1.2929 |
| 1418681_at   | Alg13         | asparagine-linked glycosylation 13                                                      | NM_026247 | 6.0300 | 7.3238  | -1.2938 |
| 1416978_at   | Fcgrt         | Fc receptor, IgG, alpha chain transporter                                               | NM_010189 | 6.5424 | 7.8363  | -1.2939 |
| 1454759_at   | Git1          | G protein-coupled receptor kinase-interactor 1                                          | AV230461  | 7.4140 | 8.7092  | -1.2952 |
| 1449363_at   | Atf3          | activating transcription factor 3                                                       | BC019946  | 6.9019 | 8.1982  | -1.2962 |
| 1446475_at   |               |                                                                                         | BM207891  | 5.3214 | 6.6194  | -1.2980 |
| 1438024_at   | Ccdc90a       | coiled-coil domain containing 90A                                                       | AW554392  | 9.0892 | 10.3878 | -1.2987 |
| 1451381_at   | 1810020D17Rik | RIKEN cDNA 1810020D17 gene                                                              | BC026557  | 7.7713 | 9.0711  | -1.2998 |
| 1453233_s_at | Calr3         | calreticulin 3                                                                          | AK006582  | 4.2615 | 5.5616  | -1.3001 |
| 1428748_at   | Zfp826        | zinc finger protein 826                                                                 | BM202530  | 5.1239 | 6.4242  | -1.3003 |
| 1416633_a_at | Fam96a        | family with sequence similarity 96, member A                                            | NM_026635 | 9.8120 | 11.1128 | -1.3008 |
| 1431364_a_at |               |                                                                                         | BC026878  | 5.7781 | 7.0790  | -1.3010 |
| 1457825_x_at | Tcn2          | transcobalamin 2                                                                        | BB515151  | 7.6633 | 8.9654  | -1.3021 |
| 1416049_at   | Gldc          | glycine decarboxylase                                                                   | NM_138595 | 4.6798 | 5.9820  | -1.3022 |
| 1456405_at   | Dido1         | death inducer-obliterator 1                                                             | BG063067  | 7.2099 | 8.5124  | -1.3024 |
| 1423636_at   | Wdr31         | WD repeat domain 31                                                                     | AK017259  | 5.2956 | 6.5981  | -1.3024 |
| 1450905_at   | Plxnc1        | plexin C1                                                                               | BB476707  | 4.0372 | 5.3414  | -1.3042 |

|              |               |                                                                                                                                      |           |         |         |         |
|--------------|---------------|--------------------------------------------------------------------------------------------------------------------------------------|-----------|---------|---------|---------|
| 1455583_at   | Gne           | glucosamine (UDP-N-acetyl)-2-epimerase/N-acetylmannosamine kinase                                                                    | AV371374  | 5.1960  | 6.5005  | -1.3045 |
| 1454572_at   | 2810414N06Rik | RIKEN cDNA 2810414N06 gene                                                                                                           | AK013093  | 4.4196  | 5.7245  | -1.3049 |
| 1421050_at   | Vps25         | vacuolar protein sorting 25 (yeast)                                                                                                  | NM_026776 | 4.9332  | 6.2392  | -1.3060 |
| 1429909_at   | Prr5l         | proline rich 5 like                                                                                                                  | AK014682  | 3.7042  | 5.0107  | -1.3065 |
| 1452913_at   | Pcp4l1        | Purkinje cell protein 4-like 1                                                                                                       | AV337888  | 4.5316  | 5.8382  | -1.3066 |
| 1454222_a_at | Ccdc13        | coiled-coil domain containing 13                                                                                                     | AK013632  | 6.0888  | 7.3958  | -1.3070 |
| 1428410_at   | Naa50         | N(alpha)-acetyltransferase 50, NatE catalytic subunit                                                                                | AK013287  | 8.3585  | 9.6669  | -1.3084 |
| 1437867_at   |               |                                                                                                                                      | C77655    | 4.7549  | 6.0634  | -1.3085 |
| 1443915_at   | Mrpl47        | mitochondrial ribosomal protein L47                                                                                                  | BE957160  | 4.8719  | 6.1807  | -1.3089 |
| 1424519_at   | Mtg1          | mitochondrial GTPase 1 homolog (S.                                                                                                   | BC027306  | 7.9624  | 9.2719  | -1.3096 |
| 1417075_at   | Fam136a       | family with sequence similarity 136, member A                                                                                        | NM_025591 | 9.7866  | 11.0966 | -1.3100 |
| 1422131_at   | Dcp1a         | DCP1 decapping enzyme homolog A (S. cerevisiae)                                                                                      | NM_133761 | 4.5776  | 5.8877  | -1.3102 |
| 1426535_at   | Poglut1       | protein O-glucosyltransferase 1                                                                                                      | AV307841  | 8.5270  | 9.8380  | -1.3110 |
| 1435830_a_at | 5430435G22Rik | RIKEN cDNA 5430435G22 gene                                                                                                           | AV293314  | 6.6578  | 7.9689  | -1.3112 |
| 1450672_a_at |               |                                                                                                                                      | NM_011637 | 6.7950  | 8.1061  | -1.3112 |
| 1433717_at   | D19Wsu162e    | DNA segment, Chr 19, Wayne State University 162, expressed                                                                           | BI903574  | 7.8808  | 9.1920  | -1.3112 |
| 1451968_at   | Xrcc5         | X-ray repair complementing defective repair in Chinese hamster cells 5                                                               | AF166486  | 7.8757  | 9.1870  | -1.3113 |
| 1448321_at   | Smoc1         | SPARC related modular calcium binding 1                                                                                              | NM_022316 | 5.7781  | 7.0897  | -1.3116 |
| 1435437_at   | Setd7         | SET domain containing (lysine methyltransferase) 7                                                                                   | BM114815  | 8.4953  | 9.8072  | -1.3119 |
| 1441558_at   | D230044B12Rik | RIKEN cDNA D230044B12 gene                                                                                                           | BB472163  | 4.5648  | 5.8775  | -1.3127 |
| 1438720_at   | 9330159F19Rik | RIKEN cDNA 9330159F19 gene                                                                                                           | AV328072  | 3.9362  | 5.2498  | -1.3136 |
| 1448993_at   | Atg3          | autophagy related 3                                                                                                                  | BC010809  | 10.0896 | 11.4038 | -1.3142 |
| 1424369_at   | Psmf1         | proteasome (prosome, macropain) inhibitor subunit 1                                                                                  | BC012260  | 5.8444  | 7.1586  | -1.3143 |
| 1449157_at   | Nr2c1         | nuclear receptor subfamily 2, group C, member 1                                                                                      | NM_011629 | 4.2966  | 5.6110  | -1.3144 |
| 1422744_at   | Phka1         | phosphorylase kinase alpha 1                                                                                                         | NM_008832 | 5.3054  | 6.6201  | -1.3147 |
| 1439323_a_at | Map4k1        | mitogen-activated protein kinase kinase kinase 1                                                                                     | BB546619  | 6.1555  | 7.4708  | -1.3153 |
| 1437566_at   | Gnl2          | guanine nucleotide binding protein-like 2 (nucleolar)                                                                                | BI666155  | 5.8326  | 7.1485  | -1.3159 |
| 1418136_at   | Tgfb1i1       | transforming growth factor beta 1 induced transcript 1                                                                               | NM_009365 | 5.7631  | 7.0790  | -1.3159 |
| 1433485_x_at | Gpr56         | G protein-coupled receptor 56                                                                                                        | BF159976  | 5.5812  | 6.8973  | -1.3161 |
| 1442203_at   | Gm2a          | GM2 ganglioside activator protein                                                                                                    | BB028429  | 4.9247  | 6.2422  | -1.3175 |
| 1442269_at   | Gm17238       | predicted gene, 17238                                                                                                                | BB749041  | 4.2411  | 5.5610  | -1.3199 |
| 1434064_at   | Orai3         | ORAI calcium release-activated calcium modulator 3                                                                                   | BQ175677  | 6.4952  | 7.8151  | -1.3199 |
| 1433481_at   | Fkbp14        | FK506 binding protein 14                                                                                                             | BB027759  | 7.5094  | 8.8296  | -1.3201 |
| 1435170_at   | Tsr2          | TSR2, 20S rRNA accumulation, homolog (S. cerevisiae)                                                                                 | BQ177187  | 5.2641  | 6.5858  | -1.3217 |
| 1423909_at   | Tmem176a      | transmembrane protein 176A                                                                                                           | BC010831  | 8.8070  | 10.1291 | -1.3221 |
| 1418472_at   | Aspa          | aspartoacylase                                                                                                                       | BC024934  | 8.7130  | 10.0355 | -1.3226 |
| 1456060_at   | Maf           | avian musculoaponeurotic fibrosarcoma (v-maf) AS42 oncogene homolog                                                                  | AV284857  | 7.3328  | 8.6554  | -1.3226 |
| 1437172_x_at | Hadhb         | hydroxyacyl-Coenzyme A dehydrogenase/3-ketoacyl-Coenzyme A thiolase/enoyl-Coenzyme A hydratase (trifunctional protein), beta subunit | AV150884  | 9.4105  | 10.7335 | -1.3229 |
| 1428795_at   | 1110021L09Rik | RIKEN cDNA 1110021L09 gene                                                                                                           | BB767129  | 6.9720  | 8.2953  | -1.3233 |
| 1423770_at   | Tmc6          | transmembrane channel-like gene family 6                                                                                             | BC004840  | 6.9262  | 8.2505  | -1.3243 |
| 1437363_at   | Homer1        | homer homolog 1 (Drosophila)                                                                                                         | BQ043238  | 7.6809  | 9.0055  | -1.3245 |
| 1450687_at   | Igf2bp3       | insulin-like growth factor 2 mRNA binding protein 3                                                                                  | NM_023670 | 5.8040  | 7.1295  | -1.3255 |
| 1436908_at   | Pcm1          | pericentriolar material 1                                                                                                            | BG076129  | 8.2598  | 9.5856  | -1.3258 |
| 1457198_at   | Nrp1          | neuropilin 1                                                                                                                         | AV291009  | 5.1852  | 6.5111  | -1.3259 |
| 1456512_at   | Pdzn4         | PDZ domain containing RING finger 4                                                                                                  | AV174487  | 4.2037  | 5.5301  | -1.3264 |
| 1426932_at   | D19Bwg1357e   | DNA segment, Chr 19, Brigham & Women's Genetics 1357 expressed                                                                       | AI314709  | 6.6474  | 7.9747  | -1.3272 |
| 1428023_at   | 3110009E18Rik | RIKEN cDNA 3110009E18 gene                                                                                                           | AA879840  | 6.8750  | 8.2023  | -1.3273 |
| 1425489_at   | Slu7          | SLU7 splicing factor homolog (S. cerevisiae)                                                                                         | BC025870  | 4.9554  | 6.2831  | -1.3277 |

|              |                |                                                                                     |           |        |         |         |
|--------------|----------------|-------------------------------------------------------------------------------------|-----------|--------|---------|---------|
| 1452888_at   | 1110034G24Rik  | RIKEN cDNA 1110034G24 gene                                                          | AK004090  | 4.6494 | 5.9772  | -1.3278 |
| 1452410_a_at | Fes            | feline sarcoma oncogene                                                             | BG867327  | 5.1786 | 6.5068  | -1.3282 |
| 1438103_at   | Pcdhgc4        | protocadherin gamma subfamily C, 4                                                  | BG069300  | 5.3282 | 6.6564  | -1.3283 |
| 1416630_at   | Id3            | inhibitor of DNA binding 3                                                          | NM_008321 | 9.9410 | 11.2694 | -1.3284 |
| 1426022_a_at | Vill           | villin-like                                                                         | BC021808  | 6.0625 | 7.3912  | -1.3287 |
| 1449000_at   | D10Jhu81e      | DNA segment, Chr 10, Johns Hopkins University 81 expressed                          | NM_138601 | 8.5074 | 9.8363  | -1.3289 |
| 1452068_at   | Naaa           | N-acyl ethanolamine acid amidase                                                    | BI106821  | 6.9325 | 8.2615  | -1.3290 |
| 1418525_at   | Pcm1           | pericentriolar material 1                                                           | NM_023662 | 6.4447 | 7.7740  | -1.3293 |
| 1455438_at   | Pxmp4          | peroxisomal membrane protein 4                                                      | AW495885  | 5.3414 | 6.6707  | -1.3293 |
| 1418755_at   | Tbx15          | T-box 15                                                                            | NM_009323 | 6.5400 | 7.8696  | -1.3296 |
| 1425804_at   | Hmx2           | H6 homeobox 2                                                                       | BC023402  | 5.3778 | 6.7079  | -1.3301 |
| 1419402_at   | Mns1           | meiosis-specific nuclear structural protein 1                                       | NM_008613 | 6.9538 | 8.2841  | -1.3303 |
| 1429867_at   | 4933424C08Rik  | RIKEN cDNA 4933424C08 gene                                                          | AK016884  | 3.9745 | 5.3054  | -1.3309 |
| 1424012_at   | Ttc30a1        | tetratricopeptide repeat domain 30A1                                                | BC004773  | 3.7936 | 5.1247  | -1.3311 |
| 1424748_at   | Galnt11        | UDP-N-acetyl-alpha-D-galactosamine:polypeptide N-acetylgalactosaminyltransferase 11 | BC021504  | 7.4518 | 8.7834  | -1.3316 |
| 1420617_at   | Cpeb4          | cytoplasmic polyadenylation element binding protein 4                               | NM_026252 | 7.1586 | 8.4906  | -1.3320 |
| 1436401_at   | Ankdd1b        | ankyrin repeat and death domain containing 1B                                       | AV024863  | 4.6674 | 5.9995  | -1.3321 |
| 1455323_at   | Rbak           | RB-associated KRAB repressor                                                        | BB446066  | 7.1176 | 8.4507  | -1.3331 |
| 1435348_at   | D930009K15Rik  | RIKEN cDNA D930009K15 gene                                                          | BQ177188  | 6.6941 | 8.0272  | -1.3331 |
| 1429582_at   | Nacc2          | nucleus accumbens associated 2, BEN and BTB (POZ) domain containing                 | BB360604  | 7.1295 | 8.4630  | -1.3335 |
| 1460138_at   |                |                                                                                     | BI500065  | 4.8229 | 6.1571  | -1.3342 |
| 1425281_a_at | Tsc22d3        | TSC22 domain family, member 3                                                       | AF201289  | 7.3417 | 8.6763  | -1.3346 |
| 1434675_at   | Zfp763         | zinc finger protein 763                                                             | BB442939  | 6.2968 | 7.6333  | -1.3365 |
| 1450913_at   | B4galt6        | UDP-Gal:betaGlcNAc beta 1,4-galactosyltransferase, polypeptide 6                    | BG066773  | 5.6689 | 7.0061  | -1.3372 |
| 1444394_at   | Acad9          | acyl-Coenzyme A dehydrogenase family, member 9                                      | BB187759  | 3.9612 | 5.2986  | -1.3374 |
| 1444779_s_at | Zfp59          | zinc finger protein 59                                                              | BE985246  | 5.6110 | 6.9488  | -1.3378 |
| 1459448_at   | Cyb5r2         | cytochrome b5 reductase 2                                                           | BB496517  | 4.8229 | 6.1607  | -1.3378 |
| 1435793_at   | Aph1b          | anterior pharynx defective 1b homolog (C. elegans)                                  | BM219801  | 6.3306 | 7.6685  | -1.3380 |
| 1439662_at   | Homer1         | homer homolog 1 (Drosophila)                                                        | BM124609  | 6.5730 | 7.9111  | -1.3381 |
| 1420390_s_at | Zfp354a        | zinc finger protein 354A                                                            | NM_009329 | 4.5215 | 5.8601  | -1.3387 |
| 1428943_at   | Nudt13         | nudix (nucleoside diphosphate linked moiety X)-type motif 13                        | BE134119  | 6.5386 | 7.8774  | -1.3388 |
| 1449718_s_at | 4930453N24Rik  | RIKEN cDNA 4930453N24 gene                                                          | AI649104  | 5.7515 | 7.0905  | -1.3389 |
| 1418473_at   | Cutc           | cutC copper transporter homolog (E.coli)                                            | BC026775  | 6.2670 | 7.6064  | -1.3394 |
| 1455190_at   | Gng7           | guanine nucleotide binding protein (G protein), gamma 7                             | BM114283  | 4.1050 | 5.4443  | -1.3394 |
| 1455403_at   | Manea          | mannosidase, endo-alpha                                                             | BB035197  | 7.5587 | 8.8985  | -1.3397 |
| 1450921_at   | Aptx           | aprataxin                                                                           | AK005286  | 7.7510 | 9.0915  | -1.3405 |
| 1434521_at   | Rfx7           | regulatory factor X, 7                                                              | BB148972  | 8.2662 | 9.6070  | -1.3408 |
| 1428992_at   | Unc13d         | unc-13 homolog D (C. elegans)                                                       | AK011827  | 5.7828 | 7.1241  | -1.3412 |
| 1453242_x_at | 2810047C21Rik1 | RIKEN cDNA 2810047C21 gene 1                                                        | BB006969  | 4.9775 | 6.3197  | -1.3421 |
| 1456341_a_at | Klf9           | Kruppel-like factor 9                                                               | AV354744  | 9.7625 | 11.1050 | -1.3425 |
| 1460082_at   | Ing3           | inhibitor of growth family, member 3                                                | BB298005  | 4.9195 | 6.2622  | -1.3427 |
| 1434768_at   | Tpp1           | tripeptidyl peptidase I                                                             | AI266910  | 7.7058 | 9.0487  | -1.3429 |
| 1419366_at   | Zmat5          | zinc finger, matrin type 5                                                          | NM_026015 | 7.0869 | 8.4299  | -1.3431 |
| 1417169_at   | Usp2           | ubiquitin specific peptidase 2                                                      | AI553394  | 6.4839 | 7.8279  | -1.3440 |
| 1416173_at   | Pes1           | pescadillo homolog 1, containing BRCT domain (zebrafish)                            | BC004844  | 4.5566 | 5.9012  | -1.3447 |
| 1449862_a_at | Pi4k2b         | phosphatidylinositol 4-kinase type 2 beta                                           | NM_028744 | 7.4838 | 8.8284  | -1.3447 |
| 1423083_at   | Rab33b         | RAB33B, member of RAS oncogene family                                               | AK004974  | 8.4317 | 9.7768  | -1.3451 |
| 1448856_a_at | MsrA           | methionine sulfoxide reductase A                                                    | NM_026322 | 5.9051 | 7.2504  | -1.3453 |
| 1440786_x_at | Sfxn2          | sideroflexin 2                                                                      | BB377927  | 4.4409 | 5.7866  | -1.3458 |
| 1456277_at   | 7530414M10Rik  | RIKEN cDNA 7530414M10 gene                                                          | BB813490  | 6.5111 | 7.8572  | -1.3461 |
| 1451141_at   | MettI8         | methyltransferase like 8                                                            | BC004636  | 6.5881 | 7.9359  | -1.3478 |
| 1452694_at   | Ip6k1          | inositol hexaphosphate kinase 1                                                     | AK004808  | 8.2105 | 9.5587  | -1.3483 |
| 1436858_at   |                |                                                                                     | BB003847  | 7.9260 | 9.2749  | -1.3488 |
| 1434784_s_at | Tmem106c       | transmembrane protein 106C                                                          | BM222050  | 7.8087 | 9.1582  | -1.3495 |
| 1424812_at   | BC017158       | cDNA sequence BC017158                                                              | BC017158  | 5.8446 | 7.1952  | -1.3506 |

|              |               |                                                                                                                                      |           |        |         |         |
|--------------|---------------|--------------------------------------------------------------------------------------------------------------------------------------|-----------|--------|---------|---------|
| 1435265_at   | Fbxo32        | F-box protein 32                                                                                                                     | BF466929  | 5.9820 | 7.3328  | -1.3507 |
| 1426522_at   | Hadhb         | hydroxyacyl-Coenzyme A dehydrogenase/3-ketoacyl-Coenzyme A thiolase/enoyl-Coenzyme A hydratase (trifunctional protein), beta subunit | BG866501  | 9.1365 | 10.4880 | -1.3516 |
| 1429716_at   | Zcchc4        | zinc finger, CCHC domain containing 4                                                                                                | BB821121  | 7.7740 | 9.1264  | -1.3524 |
| 1435628_x_at |               |                                                                                                                                      | AW763751  | 8.2505 | 9.6048  | -1.3543 |
| 1426643_at   | Elp3          | elongator acetyltransferase complex subunit 3                                                                                        | AK012072  | 8.5630 | 9.9178  | -1.3547 |
| 1422561_at   | Adamts5       | a disintegrin-like and metallopeptidase (repolysin type) with thrombospondin type 1 motif, 5 (aggrecanase-2)                         | BB658835  | 4.4663 | 5.8212  | -1.3549 |
| 1442308_at   | Smyd4         | SET and MYND domain containing 4                                                                                                     | AW538800  | 6.9578 | 8.3146  | -1.3567 |
| 1435161_at   | Sepsecs       | Sep (O-phosphoserine) tRNA:Sec (selenocysteine) tRNA synthase                                                                        | BM243223  | 6.9449 | 8.3028  | -1.3579 |
| 1446258_at   | 9530067D14Rik | Riken cDNA 9530067D14 gene                                                                                                           | BB118716  | 4.5293 | 5.8877  | -1.3585 |
| 1452461_a_at | Gnptab        | N-acetylglucosamine-1-phosphate transferase, alpha and beta subunits                                                                 | L36434    | 5.1148 | 6.4737  | -1.3589 |
| 1423421_at   | Ankrd49       | ankyrin repeat domain 49                                                                                                             | BB233668  | 6.8564 | 8.2169  | -1.3605 |
| 1420124_s_at | Tcta          | T cell leukemia translocation altered gene                                                                                           | C85065    | 5.9508 | 7.3117  | -1.3610 |
| 1423482_at   | Uros          | uroporphyrinogen III synthase                                                                                                        | AW545289  | 6.3866 | 7.7487  | -1.3621 |
| 1425207_at   | Slc22a22      | solute carrier family 22 (organic cation transporter), member 22                                                                     | BC026439  | 3.8029 | 5.1653  | -1.3624 |
| 1435834_at   | Fancf         | Fanconi anemia, complementation group F                                                                                              | BB667193  | 7.0351 | 8.3989  | -1.3638 |
| 1439783_at   | C330018D20Rik | RIKEN cDNA C330018D20 gene                                                                                                           | BB809870  | 4.6991 | 6.0634  | -1.3643 |
| 1442175_at   |               |                                                                                                                                      | BB358264  | 4.2467 | 5.6110  | -1.3643 |
| 1450395_at   | Slc22a5       | solute carrier family 22 (organic cation transporter), member 5                                                                      | NM_011396 | 7.6853 | 9.0504  | -1.3651 |
| 1427150_at   | Mll3          | myeloid/lymphoid or mixed-lineage leukemia 3                                                                                         | BC022622  | 6.2857 | 7.6515  | -1.3658 |
| 1424267_at   | 1810043G02Rik | RIKEN cDNA 1810043G02 gene                                                                                                           | BC010330  | 6.9676 | 8.3335  | -1.3659 |
| 1443618_at   |               |                                                                                                                                      | AU046269  | 3.9024 | 5.2685  | -1.3661 |
| 1459913_at   | Tnfsf10       | tumor necrosis factor (ligand) superfamily, member 10                                                                                | AI645293  | 3.9024 | 5.2685  | -1.3661 |
| 1418496_at   | Foxa1         | forkhead box A1                                                                                                                      | NM_008259 | 3.7307 | 5.0970  | -1.3662 |
| 1423157_at   | Gnpat1        | glucosamine-phosphate N-acetyltransferase 1                                                                                          | AK008566  | 6.3895 | 7.7563  | -1.3668 |
| 1421011_at   | Hsd17b11      | hydroxysteroid (17-beta) dehydrogenase 11                                                                                            | NM_053262 | 6.2661 | 7.6335  | -1.3674 |
| 1424293_s_at | Tmem55a       | transmembrane protein 55A                                                                                                            | BC021435  | 9.9742 | 11.3424 | -1.3681 |
| 1424134_at   | Rspry1        | ring finger and SPRY domain containing 1                                                                                             | BG073177  | 8.6531 | 10.0219 | -1.3688 |
| 1442843_at   | 4933411D12Rik | RIKEN cDNA 4933411D12 gene                                                                                                           | AW555863  | 5.4225 | 6.7914  | -1.3689 |
| 1438682_at   | Pik3r1        | phosphatidylinositol 3-kinase, regulatory subunit, polypeptide 1 (p85 alpha)                                                         | BB426164  | 7.8204 | 9.1895  | -1.3691 |
| 1428380_at   | 0610007C21Rik | RIKEN cDNA 0610007C21 gene                                                                                                           | AK002276  | 9.3297 | 10.6989 | -1.3692 |
| 1417623_at   | Slc12a2       | solute carrier family 12, member 2                                                                                                   | BG069505  | 8.1907 | 9.5599  | -1.3692 |
| 1452664_a_at | Tm7sf3        | transmembrane 7 superfamily member 3                                                                                                 | AK010720  | 9.0015 | 10.3716 | -1.3701 |
| 1421883_at   | Elavl2        | ELAV (embryonic lethal, abnormal vision, Drosophila)-like 2 (Hu antigen B)                                                           | BB105998  | 3.8976 | 5.2685  | -1.3709 |
| 1445492_at   |               |                                                                                                                                      | BE956567  | 4.4920 | 5.8632  | -1.3712 |
| 1436385_at   | Ganc          | glucosidase, alpha; neutral C                                                                                                        | BB051441  | 5.1289 | 6.5005  | -1.3716 |
| 1435615_at   | Zfp365        | zinc finger protein 365                                                                                                              | BB277790  | 5.1853 | 6.5578  | -1.3725 |
| 1440595_at   | Epb4.1l3      | erythrocyte protein band 4.1-like 3                                                                                                  | BB036542  | 4.5394 | 5.9119  | -1.3725 |
| 1451804_a_at | Lrrc16a       | leucine rich repeat containing 16A                                                                                                   | BC012229  | 3.8959 | 5.2685  | -1.3726 |
| 1417827_at   | Ngly1         | N-glycanase 1                                                                                                                        | NM_021504 | 6.8633 | 8.2362  | -1.3729 |
| 1425956_a_at | Cdadc1        | cytidine and dCMP deaminase domain containing 1                                                                                      | BC004588  | 6.1543 | 7.5278  | -1.3735 |
| 1450868_at   | Hgsnat        | heparan-alpha-glucosaminide N-acetyltransferase                                                                                      | BF468249  | 8.4972 | 9.8707  | -1.3735 |
| 1436595_at   | Rbm34         | RNA binding motif protein 34                                                                                                         | AV328743  | 7.2710 | 8.6446  | -1.3736 |
| 1435275_at   | Cox6b2        | cytochrome c oxidase subunit VIb polypeptide 2                                                                                       | AV013496  | 6.9152 | 8.2894  | -1.3743 |
| 1442992_at   | 130004C03     | uncharacterized LOC403343                                                                                                            | BB361398  | 4.1864 | 5.5610  | -1.3746 |
| 1423765_at   | Ath1          | ATH1, acid trehalase-like 1 (yeast)                                                                                                  | BC023151  | 6.4967 | 7.8716  | -1.3749 |
| 1436362_x_at | 2700079J08Rik | RIKEN cDNA 2700079J08 gene                                                                                                           | AA798895  | 8.2410 | 9.6163  | -1.3753 |
| 1417643_at   | Rsph1         | radial spoke head 1 homolog (Chlamydomonas)                                                                                          | NM_025290 | 6.6784 | 8.0541  | -1.3756 |
| 1426895_at   | Zfp191        | zinc finger protein 191                                                                                                              | BB579760  | 8.6493 | 10.0254 | -1.3761 |
| 1460566_at   | Mtap1a        | microtubule-associated protein 1 A                                                                                                   | BB765000  | 5.2800 | 6.6564  | -1.3764 |
| 1434642_at   | Hsd17b11      | hydroxysteroid (17-beta) dehydrogenase 11                                                                                            | BB546344  | 9.1290 | 10.5057 | -1.3767 |
| 1454998_at   | 1200011I18Rik | RIKEN cDNA 1200011I18 gene                                                                                                           | BM225303  | 7.9135 | 9.2913  | -1.3778 |
| 1452302_at   | Arhgef10      | Rho guanine nucleotide exchange factor (GEF) 10                                                                                      | AV345051  | 5.8877 | 7.2656  | -1.3779 |

|              |               |                                                                                  |           |         |         |         |
|--------------|---------------|----------------------------------------------------------------------------------|-----------|---------|---------|---------|
| 1426601_at   | Slc37a1       | solute carrier family 37 (glycerol-3-phosphate transporter), member 1            | AV376428  | 6.0693  | 7.4474  | -1.3782 |
| 1459869_x_at | Pdpr          | pyruvate dehydrogenase phosphatase regulatory subunit                            | BB079116  | 8.0826  | 9.4609  | -1.3784 |
| 1415911_at   | Impact        | imprinted and ancient                                                            | NM_008378 | 7.5306  | 8.9095  | -1.3790 |
| 1449626_s_at | Acbd4         | acyl-Coenzyme A binding domain containing 4                                      | AI849317  | 6.7836  | 8.1626  | -1.3791 |
| 1452752_at   | Lepre1        | leprecan 1                                                                       | BE283629  | 6.5839  | 7.9631  | -1.3792 |
| 1422818_at   | Nedd9         | neural precursor cell expressed, developmentally down-regulated gene 9           | NM_017464 | 8.5539  | 9.9335  | -1.3796 |
| 1434517_at   | Wdfy2         | WD repeat and FYVE domain containing 2                                           | BB794924  | 6.9450  | 8.3247  | -1.3797 |
| 1428285_at   | 8430427H17Rik | RIKEN cDNA 8430427H17 gene                                                       | AK018446  | 6.1556  | 7.5356  | -1.3800 |
| 1442434_at   | D8Ert82e      | DNA segment, Chr 8, ERATO Doi 82, expressed                                      | BM195829  | 7.4774  | 8.8576  | -1.3802 |
| 1429831_at   | Pik3ap1       | phosphoinositide-3-kinase adaptor protein 1                                      | BI684288  | 4.5550  | 5.9357  | -1.3807 |
| 1453374_at   | Zfand5        | zinc finger, AN1-type domain 5                                                   | AW744618  | 4.1803  | 5.5610  | -1.3807 |
| 1439586_at   | LOC548102     | uncharacterized LOC548102                                                        | BM240205  | 3.6732  | 5.0544  | -1.3813 |
| 1452799_at   | Fggy          | FGGY carbohydrate kinase domain containing                                       | AK009249  | 5.6689  | 7.0503  | -1.3814 |
| 1423802_at   | Camkv         | CaM kinase-like vesicle-associated                                               | BC017634  | 4.6674  | 6.0489  | -1.3815 |
| 1427156_s_at | Ascc2         | activating signal cointegrator 1 complex subunit 2                               | BB756983  | 7.5938  | 8.9769  | -1.3831 |
| 1455887_at   | Alg8          | asparagine-linked glycosylation 8 (alpha-1,3-glucosyltransferase)                | BM249614  | 7.5169  | 8.9005  | -1.3835 |
| 1431055_a_at | Snx10         | sorting nexin 10                                                                 | AK010399  | 8.5895  | 9.9733  | -1.3838 |
| 1445849_at   | BC080696      | cDNA sequence BC080696                                                           | BG070782  | 5.3239  | 6.7079  | -1.3840 |
| 1419247_at   | Rgs2          | regulator of G-protein signaling 2                                               | AF215668  | 5.3414  | 6.7259  | -1.3845 |
| 1451259_at   | Rexo2         | REX2, RNA exonuclease 2 homolog (S. cerevisiae)                                  | BC003445  | 9.3935  | 10.7782 | -1.3848 |
| 1428162_at   | 4933421E11Rik | RIKEN cDNA 4933421E11 gene                                                       | AK008209  | 6.7857  | 8.1710  | -1.3853 |
| 1416147_at   | Hspa4         | heat shock protein 4                                                             | BE912771  | 7.7503  | 9.1358  | -1.3856 |
| 1416289_at   | Plod1         | procollagen-lysine, 2-oxoglutarate 5-dioxygenase 1                               | NM_011122 | 7.6667  | 9.0531  | -1.3865 |
| 1419328_at   | Sema4f        | sema domain, immunoglobulin domain (Ig), TM domain, and short cytoplasmic domain | AB021291  | 6.0047  | 7.3912  | -1.3865 |
| 1431179_at   | Entpd7        | ectonucleoside triphosphate diphosphohydrolase 7                                 | BB873170  | 5.7257  | 7.1128  | -1.3871 |
| 1457083_at   |               |                                                                                  | BB278392  | 5.3690  | 6.7577  | -1.3887 |
| 1455667_at   | Preb          | prolactin regulatory element binding                                             | AV362891  | 4.9195  | 6.3103  | -1.3908 |
| 1434261_at   | Sipa1l2       | signal-induced proliferation-associated 1 like 2                                 | AV228782  | 6.7152  | 8.1061  | -1.3909 |
| 1434982_at   | Rnf182        | ring finger protein 182                                                          | AV327376  | 4.7207  | 6.1117  | -1.3910 |
| 1456437_x_at |               |                                                                                  | BB558917  | 5.2289  | 6.6203  | -1.3913 |
| 1455413_at   | Zfp11         | zinc finger protein 11                                                           | BB053703  | 5.2361  | 6.6275  | -1.3915 |
| 1441680_at   |               |                                                                                  | BM117447  | 5.4771  | 6.8688  | -1.3917 |
| 1435993_at   | Zkscan4       | zinc finger with KRAB and SCAN domains 4                                         | BB027219  | 4.1689  | 5.5610  | -1.3921 |
| 1448609_at   | Tst           | thiosulfate sulfurtransferase, mitochondrial                                     | BC005644  | 6.3586  | 7.7515  | -1.3929 |
| 1455117_at   | Mcm9          | minichromosome maintenance complex component 9                                   | AV274182  | 5.7245  | 7.1175  | -1.3930 |
| 1448563_at   | Phb           | prohibitin                                                                       | AK010619  | 8.3707  | 9.7641  | -1.3933 |
| 1420543_at   | Dnajc28       | DnaJ (Hsp40) homolog, subfamily C, member 28                                     | BC005604  | 4.9248  | 6.3183  | -1.3935 |
| 1455723_at   | D1Ert448e     | DNA segment, Chr 1, ERATO Doi 448, expressed                                     | AV279416  | 6.4952  | 7.8889  | -1.3937 |
| 1454724_x_at | Fam108b       | family with sequence similarity 108, member B                                    | AV173092  | 10.2398 | 11.6335 | -1.3938 |
| 1419914_s_at | Nus1          | nuclear undecaprenyl pyrophosphate synthase 1 homolog (S. cerevisiae)            | AW538011  | 9.4815  | 10.8754 | -1.3939 |
| 1424599_at   | Fgl1          | fibrinogen-like protein 1                                                        | BC021946  | 4.4196  | 5.8136  | -1.3940 |
| 1459835_s_at | Dnaja1        | DnaJ (Hsp40) homolog, subfamily A, member 1                                      | BB414617  | 8.9005  | 10.2946 | -1.3941 |
| 1442424_at   |               |                                                                                  | BB368771  | 6.0989  | 7.4935  | -1.3946 |
| 1430150_at   | Dcp2          | DCP2 decapping enzyme homolog (S. cerevisiae)                                    | AK017809  | 6.3480  | 7.7451  | -1.3971 |
| 1421773_at   | Etv2          | ets variant gene 2                                                               | NM_007959 | 5.2286  | 6.6275  | -1.3990 |
| 1417502_at   | Tspan7        | tetraspanin 7                                                                    | AF052492  | 5.2430  | 6.6421  | -1.3991 |
| 1432156_a_at | Rnf32         | ring finger protein 32                                                           | AK012288  | 4.7207  | 6.1198  | -1.3991 |
| 1443157_at   |               |                                                                                  | BB470847  | 4.2115  | 5.6110  | -1.3996 |
| 1426697_a_at | Lrpap1        | low density lipoprotein receptor-related protein associated protein 1            | D00622    | 7.0740  | 8.4739  | -1.3998 |
| 1458820_at   | Zfp560        | zinc finger protein 560                                                          | AV300514  | 3.7246  | 5.1247  | -1.4001 |

|              |               |                                                                          |           |         |         |         |
|--------------|---------------|--------------------------------------------------------------------------|-----------|---------|---------|---------|
| 1423759_a_at | Tmco1         | transmembrane and coiled-coil domains 1                                  | BC020098  | 9.6550  | 11.0556 | -1.4006 |
| 1431095_a_at | Herc6         | hect domain and RLD 6                                                    | AI639807  | 7.2562  | 8.6569  | -1.4007 |
| 1426460_a_at | Ugp2          | UDP-glucose pyrophosphorylase 2                                          | AI788759  | 6.3234  | 7.7248  | -1.4014 |
| 1460700_at   | Stat3         | signal transducer and activator of transcription 3                       | AK004083  | 8.2051  | 9.6071  | -1.4020 |
| 1450177_at   | Ngfr          | nerve growth factor receptor (TNFR superfamily, member 16)               | BI151406  | 5.7456  | 7.1485  | -1.4029 |
| 1425969_a_at | Htt           | huntingtin                                                               | L23312    | 8.0083  | 9.4112  | -1.4029 |
| 1442740_at   | Prdm5         | PR domain containing 5                                                   | BM219213  | 4.9833  | 6.3864  | -1.4030 |
| 1434681_at   | Txlng         | taxilin gamma                                                            | BG069603  | 6.4183  | 7.8215  | -1.4032 |
| 1423880_at   | D10Wsu52e     | DNA segment, Chr 10, Wayne State University 52, expressed                | BC003288  | 9.2817  | 10.6852 | -1.4035 |
| 1433505_a_at | Lrrc8d        | leucine rich repeat containing 8D                                        | BB315861  | 8.3422  | 9.7463  | -1.4041 |
| 1439014_at   | Mb21d2        | Mab-21 domain containing 2                                               | BB703667  | 6.0039  | 7.4083  | -1.4045 |
| 1431398_at   |               |                                                                          | AK012902  | 5.1383  | 6.5436  | -1.4053 |
| 1435148_at   | Atp1b2        | ATPase, Na <sup>+</sup> /K <sup>+</sup> transporting, beta 2 polypeptide | BG261955  | 6.3554  | 7.7607  | -1.4054 |
| 1426896_at   | Zfp191        | zinc finger protein 191                                                  | BB579760  | 6.5424  | 7.9483  | -1.4059 |
| 1445518_at   |               |                                                                          | BG061923  | 4.2050  | 5.6110  | -1.4060 |
| 1449188_at   | Midn          | midnolin                                                                 | NM_021565 | 8.4671  | 9.8735  | -1.4064 |
| 1451483_s_at | 1700054N08Rik | RIKEN cDNA 1700054N08 gene                                               | BC024705  | 7.0755  | 8.4820  | -1.4065 |
| 1435098_at   |               |                                                                          | BF658992  | 5.3726  | 6.7797  | -1.4071 |
| 1447544_at   |               |                                                                          | BB486335  | 5.4771  | 6.8852  | -1.4081 |
| 1449749_s_at | Tfb1m         | transcription factor B1, mitochondrial                                   | AI429207  | 7.4211  | 8.8304  | -1.4093 |
| 1420688_a_at | Sgce          | sarcoglycan, epsilon                                                     | NM_011360 | 8.4548  | 9.8645  | -1.4097 |
| 1434920_a_at | Evl           | Ena-vasodilator stimulated phosphoprotein                                | AW553781  | 6.8057  | 8.2156  | -1.4099 |
| 1435393_at   | Mc1r          | melanocortin 1 receptor                                                  | BB765942  | 4.6674  | 6.0777  | -1.4103 |
| 1417539_at   | Slc35a1       | solute carrier family 35 (CMP-sialic acid transporter), member 1         | NM_011895 | 7.4584  | 8.8690  | -1.4105 |
| 1456739_x_at | Armcx2        | armadillo repeat containing, X-linked 2                                  | BB392869  | 9.9946  | 11.4063 | -1.4117 |
| 1450759_at   | Bmp6          | bone morphogenetic protein 6                                             | NM_007556 | 5.4443  | 6.8564  | -1.4121 |
| 1422149_at   | Foxo4         | forkhead box O4                                                          | AB032770  | 5.5405  | 6.9527  | -1.4123 |
| 1446160_x_at | Tmem69        | transmembrane protein 69                                                 | BB234363  | 4.3652  | 5.7781  | -1.4129 |
| 1436562_at   | Ddx58         | DEAD (Asp-Glu-Ala-Asp) box polypeptide 58                                | BG063981  | 9.2634  | 10.6764 | -1.4130 |
| 1419793_at   | D5Ert615e     | DNA segment, Chr 5, ERATO Doi 615, expressed                             | BG069991  | 4.6127  | 6.0270  | -1.4142 |
| 1452006_x_at | Zbtb8os       | zinc finger and BTB domain containing 8 opposite strand                  | BB417508  | 3.6732  | 5.0880  | -1.4148 |
| 1452655_at   | Zdhhc2        | zinc finger, DHHC domain containing 2                                    | BB224658  | 5.5812  | 6.9977  | -1.4165 |
| 1448780_at   | Slc12a2       | solute carrier family 12, member 2                                       | BG069505  | 7.3470  | 8.7635  | -1.4165 |
| 1437253_at   | Fam116a       | family with sequence similarity 116, member A                            | BB235551  | 7.6230  | 9.0404  | -1.4174 |
| 1427670_a_at | Tcf12         | transcription factor 12                                                  | M97636    | 10.9370 | 12.3545 | -1.4175 |
| 1460596_at   | Agtrap        | angiotensin II, type I receptor-associated protein                       | BI648497  | 7.3026  | 8.7207  | -1.4180 |
| 1428434_at   | Zcchc12       | zinc finger, CCHC domain containing 12                                   | AK012833  | 6.2627  | 7.6809  | -1.4182 |
| 1434636_at   | Homez         | homeodomain leucine zipper-encoding gene                                 | AV298304  | 3.6743  | 5.0932  | -1.4189 |
| 1445175_at   | Gm4117        | predicted gene 4117                                                      | BB536129  | 5.0544  | 6.4737  | -1.4193 |
| 1416647_at   | Bckdha        | branched chain ketoacid dehydrogenase E1, alpha polypeptide              | NM_007533 | 7.6886  | 9.1082  | -1.4196 |
| 1416634_at   | Fam96a        | family with sequence similarity 96, member A                             | NM_026635 | 9.5069  | 10.9272 | -1.4203 |
| 1444786_at   | Nol3          | nucleolar protein 3 (apoptosis repressor with CARD domain)               | BB546891  | 4.6461  | 6.0668  | -1.4206 |
| 1426267_at   | Zbtb8os       | zinc finger and BTB domain containing 8 opposite strand                  | BB417508  | 3.6167  | 5.0378  | -1.4211 |
| 1441326_at   | Cp            | ceruloplasmin                                                            | AV381752  | 3.7420  | 5.1635  | -1.4215 |
| 1452620_at   | Pck2          | phosphoenolpyruvate carboxykinase 2 (mitochondrial)                      | BB024477  | 6.6790  | 8.1009  | -1.4219 |
| 1425525_a_at | P2rx4         | purinergic receptor P2X, ligand-gated ion channel 4                      | AF089751  | 9.2813  | 10.7058 | -1.4245 |
| 1433576_at   | Mat2a         | methionine adenosyltransferase II, alpha                                 | BG065061  | 8.3716  | 9.7963  | -1.4247 |
| 1425530_a_at | Stx3          | syntaxin 3                                                               | D29800    | 4.1351  | 5.5610  | -1.4259 |
| 1460698_a_at | Sec11c        | SEC11 homolog C (S. cerevisiae)                                          | AK007641  | 9.2423  | 10.6686 | -1.4263 |
| 1439777_at   | Celf2         | CUGBP, Elav-like family member 2                                         | BB308170  | 3.9166  | 5.3433  | -1.4266 |
| 1456818_at   | Stk32a        | serine/threonine kinase 32A                                              | BB279083  | 4.7135  | 6.1404  | -1.4269 |
| 1446594_at   | Gm4371        | eukaryotic translation initiation factor 3, subunit I pseudogene         | BB205215  | 5.2685  | 6.6959  | -1.4274 |
| 1417888_at   | Trim13        | tripartite motif-containing 13                                           | NM_023233 | 6.7928  | 8.2203  | -1.4275 |

|                 |               |                                                                                          |               |         |         |         |
|-----------------|---------------|------------------------------------------------------------------------------------------|---------------|---------|---------|---------|
| 1425343_at      | Hdhd3         | haloacid dehalogenase-like hydrolase domain containing 3                                 | BC003491      | 5.8032  | 7.2308  | -1.4276 |
| 1456004_x_at    | lapp          | islet amyloid polypeptide                                                                | BB434117      | 4.9965  | 6.4242  | -1.4276 |
| 1455271_at      | Gm13889       | predicted gene 13889                                                                     | BB560177      | 6.2056  | 7.6333  | -1.4277 |
| 1452261_at      | Shprh         | SNF2 histone linker PHD RING helicase                                                    | BC006883      | 7.1623  | 8.5900  | -1.4277 |
| 1437914_at      | E2f6          | E2F transcription factor 6                                                               | BB104097      | 6.5606  | 7.9884  | -1.4278 |
| 1452583_s_at    | Galm          | galactose mutarotase                                                                     | AV307219      | 6.8811  | 8.3091  | -1.4279 |
| 1438767_at      | Osm           | oncostatin M                                                                             | BB237825      | 5.6292  | 7.0575  | -1.4283 |
| 1442811_at      | Rgmb          | RGM domain family, member B                                                              | BG073728      | 6.5111  | 7.9398  | -1.4287 |
| 1441396_at      | B3galt1       | UDP-Gal:betaGlcNAc beta 1,3-galactosyltransferase, polypeptide 1                         | AV328619      | 3.5815  | 5.0107  | -1.4293 |
| 1428083_at      | Neat1         | nuclear paraspeckle assembly transcript 1 (non-protein coding)                           | AK018202      | 9.1863  | 10.6160 | -1.4298 |
| 1424913_at      | 2310044G17Rik | RIKEN cDNA 2310044G17 gene                                                               | AK009800      | 3.9697  | 5.3996  | -1.4299 |
| 1444619_x_at    | Psmb8         | proteasome (prosome, macropain) subunit, beta type 8 (large multifunctional peptidase 7) | AV068122      | 4.3717  | 5.8041  | -1.4324 |
| 1460006_at      | Zfh3          | zinc finger homeobox 3                                                                   | AI851177      | 6.8462  | 8.2802  | -1.4340 |
| 1459238_at      |               |                                                                                          | AV319481      | 4.4535  | 5.8877  | -1.4342 |
| FX-MURINE_b1_at |               |                                                                                          | AFFX-MURINE_E | 11.2291 | 12.6636 | -1.4344 |
| 1428683_at      | Fam173b       | family with sequence similarity 173, member B                                            | AK020868      | 7.4080  | 8.8430  | -1.4350 |
| 1450859_s_at    |               |                                                                                          | AK009276      | 7.5043  | 8.9407  | -1.4364 |
| 1440714_at      |               |                                                                                          | BB083283      | 4.3138  | 5.7515  | -1.4377 |
| 1451941_a_at    | Fcgr2b        | Fc receptor, IgG, low affinity IIb                                                       | M14216        | 4.1035  | 5.5415  | -1.4380 |
| 1436122_at      | Zfp667        | zinc finger protein 667                                                                  | BF467246      | 6.1109  | 7.5489  | -1.4380 |
| 1426236_a_at    | Glul          | glutamate-ammonia ligase (glutamine synthetase)                                          | AI391218      | 9.2929  | 10.7312 | -1.4384 |
| 1455448_at      | Dagla         | diacylglycerol lipase, alpha                                                             | BG804066      | 7.0245  | 8.4630  | -1.4385 |
| 1424182_at      | Acat1         | acetyl-Coenzyme A acetyltransferase 1                                                    | BG070487      | 7.0394  | 8.4783  | -1.4389 |
| 1425024_at      | E430018J23Rik | RIKEN cDNA E430018J23 gene                                                               | BC010442      | 3.9748  | 5.4139  | -1.4392 |
| 1432329_a_at    | Matk          | megakaryocyte-associated tyrosine kinase                                                 | AK018182      | 3.5815  | 5.0207  | -1.4393 |
| 1423768_at      | Unc93b1       | unc-93 homolog B1 (C. elegans)                                                           | BC018388      | 6.1114  | 7.5513  | -1.4400 |
| 1459437_at      | Stard9        | START domain containing 9                                                                | BB181574      | 4.7207  | 6.1607  | -1.4400 |
| 1460179_at      | Dnaja1        | DnaJ (Hsp40) homolog, subfamily A, member 1                                              | BF141076      | 9.8037  | 11.2437 | -1.4400 |
| 1435781_at      | Cand1         | cullin associated and neddylation disassociated 1                                        | BB380335      | 5.9357  | 7.3766  | -1.4409 |
| 1459274_at      | Gpr135        | G protein-coupled receptor 135                                                           | AV221890      | 3.5684  | 5.0107  | -1.4424 |
| 1456620_at      | Gnptab        | N-acetylglucosamine-1-phosphate transferase, alpha and beta subunits                     | BE944732      | 6.4210  | 7.8634  | -1.4424 |
| 1449008_at      | Tulp3         | tubby-like protein 3                                                                     | NM_011657     | 9.7095  | 11.1537 | -1.4442 |
| 1425198_at      | Ptpn2         | protein tyrosine phosphatase, non-receptor type 2                                        | BG076152      | 4.1664  | 5.6110  | -1.4447 |
| 1422574_at      | Mxd4          | Max dimerization protein 4                                                               | BE291523      | 7.1707  | 8.6155  | -1.4448 |
| 1450685_at      | Arpp19        | cAMP-regulated phosphoprotein 19                                                         | BE648432      | 7.6558  | 9.1012  | -1.4454 |
| 1427082_at      | Sdr42e1       | short chain dehydrogenase/reductase family 42E, member 1                                 | AK014586      | 4.6134  | 6.0591  | -1.4457 |
| 1456492_at      | Mau2          | MAU2 chromatid cohesion factor homolog (C. elegans)                                      | BB279767      | 6.1404  | 7.5863  | -1.4459 |
| 1428704_at      | Zfp661        | zinc finger protein 661                                                                  | BB065039      | 4.6530  | 6.0989  | -1.4459 |
| 1436051_at      | Myo5a         | myosin VA                                                                                | BQ174518      | 7.8877  | 9.3344  | -1.4467 |
| 1435000_at      | Gspt1         | G1 to S phase transition 1                                                               | AW537663      | 7.2876  | 8.7343  | -1.4467 |
| 1416328_a_at    | Atp6v0e       | ATPase, H+ transporting, lysosomal V0 subunit E                                          | NM_025272     | 10.5808 | 12.0279 | -1.4470 |
| 1455906_at      | Tmem241       | transmembrane protein 241                                                                | AV222909      | 4.6695  | 6.1173  | -1.4478 |
| 1418085_at      | Prkcz         | protein kinase C, zeta                                                                   | NM_008860     | 4.9195  | 6.3688  | -1.4493 |
| 1434049_at      | Entpd3        | ectonucleoside triphosphate diphosphohydrolase 3                                         | BB547934      | 5.2306  | 6.6801  | -1.4494 |
| 1443290_at      |               |                                                                                          | AV327713      | 3.8918  | 5.3414  | -1.4496 |
| 1427411_s_at    | Dleu2         | deleted in lymphocytic leukemia, 2                                                       | BB812902      | 4.2191  | 5.6689  | -1.4498 |
| 1435746_at      | Srpk2         | serine/arginine-rich protein specific kinase 2                                           | BB127386      | 7.1458  | 8.5959  | -1.4501 |
| 1416116_at      | Orc3          | origin recognition complex, subunit 3                                                    | BF161073      | 6.0270  | 7.4774  | -1.4504 |
| 1450455_s_at    |               |                                                                                          | AF177041      | 3.9701  | 5.4208  | -1.4507 |
| 1435477_s_at    | Fcgr2b        | Fc receptor, IgG, low affinity IIb                                                       | BM224327      | 3.6037  | 5.0544  | -1.4507 |
| 1438060_at      | Npas3         | neuronal PAS domain protein 3                                                            | AV226749      | 5.9785  | 7.4297  | -1.4513 |
| 1435378_at      | 2210020M01Rik | RIKEN cDNA 2210020M01 gene                                                               | BE852759      | 5.3414  | 6.7928  | -1.4514 |
| 1447926_at      | Arl5a         | ADP-ribosylation factor-like 5A                                                          | BB811124      | 7.1392  | 8.5907  | -1.4515 |
| 1446569_at      |               |                                                                                          | BB535350      | 3.6732  | 5.1247  | -1.4515 |

|              |               |                                                                                        |           |        |         |         |
|--------------|---------------|----------------------------------------------------------------------------------------|-----------|--------|---------|---------|
| 1425169_at   | Prss42        | protease, serine, 42                                                                   | AB052292  | 5.0895 | 6.5424  | -1.4529 |
| 1441949_x_at | Slc39a6       | solute carrier family 39 (metal ion transporter), member 6                             | BB213740  | 5.4443 | 6.8973  | -1.4530 |
| 1429337_at   | Tmem87b       | transmembrane protein 87B                                                              | BB161454  | 5.2545 | 6.7079  | -1.4534 |
| 1460167_at   | Aldh7a1       | aldehyde dehydrogenase family 7, member A1                                             | BC012407  | 8.7023 | 10.1563 | -1.4540 |
| 1416662_at   | Sardh         | sarcosine dehydrogenase                                                                | BI217574  | 5.9965 | 7.4533  | -1.4568 |
| 1441367_a_at |               |                                                                                        | BG076370  | 4.5699 | 6.0270  | -1.4571 |
| 1433581_at   | 1190002N15Rik | RIKEN cDNA 1190002N15 gene                                                             | AV309085  | 7.1266 | 8.5845  | -1.4579 |
| 1451665_a_at | Ap4s1         | adaptor-related protein complex AP-4, sigma 1                                          | BC001985  | 7.6525 | 9.1108  | -1.4583 |
| 1421152_a_at | Gnao1         | guanine nucleotide binding protein, alpha O                                            | NM_010308 | 5.3909 | 6.8498  | -1.4589 |
| 1433661_at   | Nlr1          | NLR family member X1                                                                   | BB830346  | 4.7207 | 6.1807  | -1.4600 |
| 1421469_a_at | Stat5a        | signal transducer and activator of transcription 5A                                    | U36502    | 5.7184 | 7.1787  | -1.4603 |
| 1425201_a_at | Hyi           | hydroxypyruvate isomerase homolog (E. coli)                                            | BC024619  | 6.9029 | 8.3640  | -1.4611 |
| 1459630_at   |               |                                                                                        | BM122487  | 4.6015 | 6.0634  | -1.4619 |
| 1435828_at   | Maf           | avian musculoaponeurotic fibrosarcoma (v-maf) AS42 oncogene homolog                    | BM240693  | 3.6142 | 5.0762  | -1.4620 |
| 1432417_a_at | Tspan2        | tetraspanin 2                                                                          | AK020982  | 5.7162 | 7.1787  | -1.4625 |
| 1460577_at   | Jmy           | junction-mediating and regulatory protein                                              | BQ031479  | 8.2016 | 9.6656  | -1.4640 |
| 1456574_at   | Zfp800        | zinc finger protein 800                                                                | BB224546  | 5.6841 | 7.1485  | -1.4644 |
| 1428134_at   | Coq9          | coenzyme Q9 homolog (yeast)                                                            | AK004527  | 8.6578 | 10.1235 | -1.4658 |
| 1451130_at   | Use1          | unconventional SNARE in the ER 1 homolog (S. cerevisiae)                               | AF353245  | 9.5530 | 11.0188 | -1.4658 |
| 1449541_x_at | 1700010I14Rik | RIKEN cDNA 1700010I14 gene                                                             | NM_025851 | 4.2219 | 5.6886  | -1.4667 |
| 1434067_at   | AI662270      | expressed sequence AI662270                                                            | BE688410  | 8.6402 | 10.1071 | -1.4668 |
| 1428288_at   | Klf9          | Kruppel-like factor 9                                                                  | AW488885  | 9.1129 | 10.5798 | -1.4669 |
| 1449009_at   |               |                                                                                        | NM_011579 | 9.7804 | 11.2475 | -1.4671 |
| 1439345_at   | Gpnmb         | glycoprotein (transmembrane) nmb                                                       | BB113177  | 6.4123 | 7.8798  | -1.4675 |
| 1455165_at   | Rora          | RAR-related orphan receptor alpha                                                      | BE335227  | 3.9968 | 5.4647  | -1.4679 |
| 1437083_at   | Tmem169       | transmembrane protein 169                                                              | BB475607  | 4.1033 | 5.5715  | -1.4683 |
| 1424475_at   | Camkk2        | calcium/calmodulin-dependent protein kinase kinase 2, beta                             | BI157430  | 6.5587 | 8.0272  | -1.4685 |
| 1422586_at   | Ecel1         | endothelin converting enzyme-like 1                                                    | NM_021306 | 5.5179 | 6.9873  | -1.4694 |
| 1430247_at   | Daam2         | dishevelled associated activator of morphogenesis 2                                    | AK009382  | 4.9880 | 6.4574  | -1.4694 |
| 1441980_at   | Tbck          | TBC1 domain containing kinase                                                          | BB355593  | 6.2392 | 7.7111  | -1.4719 |
| 1417540_at   | Elf1          | E74-like factor 1                                                                      | NM_007920 | 8.4332 | 9.9057  | -1.4725 |
| 1426937_at   | 6330406I15Rik | RIKEN cDNA 6330406I15 gene                                                             | AK018128  | 3.5815 | 5.0544  | -1.4730 |
| 1451418_a_at | Spsb4         | splA/ryanodine receptor domain and SOCS box containing 4                               | BC023083  | 3.5815 | 5.0544  | -1.4730 |
| 1419466_at   | Nkd2          | naked cuticle 2 homolog (Drosophila)                                                   | BC019952  | 5.2865 | 6.7607  | -1.4743 |
| 1423965_at   | Cd99l2        | CD99 antigen-like 2                                                                    | BB038546  | 7.6740 | 9.1484  | -1.4745 |
| 1418408_at   | Zfand1        | zinc finger, AN1-type domain 1                                                         | NM_025512 | 6.5971 | 8.0726  | -1.4755 |
| 1435119_at   | Gm19439       | predicted gene, 19439                                                                  | BE956710  | 4.0222 | 5.4985  | -1.4763 |
| 1419552_at   | Echdc1        | enoyl Coenzyme A hydratase domain containing 1                                         | NM_025855 | 7.8510 | 9.3276  | -1.4767 |
| 1447304_at   |               |                                                                                        | BE628556  | 4.5865 | 6.0634  | -1.4769 |
| 1416644_a_at | Sema3b        | sema domain, immunoglobulin domain (Ig), short basic domain, secreted, (semaphorin) 3B | NM_009153 | 5.6916 | 7.1687  | -1.4770 |
| 1452056_s_at | Ppp3ca        | protein phosphatase 3, catalytic subunit, alpha isoform                                | BQ173889  | 8.6570 | 10.1343 | -1.4773 |
| 1439050_at   | Gclm          | glutamate-cysteine ligase, modifier subunit                                            | BB258019  | 6.8564 | 8.3340  | -1.4776 |
| 1456045_at   | 1700106N22Rik | RIKEN cDNA 1700106N22 gene                                                             | AV173571  | 4.1035 | 5.5812  | -1.4777 |
| 1429400_at   | Clcn5         | chloride channel 5                                                                     | BB794830  | 8.8220 | 10.3000 | -1.4780 |
| 1460682_s_at |               |                                                                                        | BC024320  | 3.9024 | 5.3806  | -1.4781 |
| 1435421_at   | Fsd1          | fibronectin type 3 and SPRY domain-containing protein                                  | BQ175318  | 6.9508 | 8.4299  | -1.4791 |
| 1426074_at   |               |                                                                                        | BC006770  | 5.7059 | 7.1853  | -1.4794 |
| 1437760_at   | Galnt12       | UDP-N-acetyl-alpha-D-galactosamine:polypeptide N-acetylgalactosaminyltransferase 12    | AV376137  | 9.3071 | 10.7881 | -1.4810 |
| 1447894_x_at | Vps52         | vacuolar protein sorting 52 (yeast)                                                    | BB429200  | 6.8729 | 8.3541  | -1.4811 |
| 1427620_at   | Cul9          | cullin 9                                                                               | BC026469  | 4.5566 | 6.0378  | -1.4813 |
| 1417622_at   | Slc12a2       | solute carrier family 12, member 2                                                     | BG069505  | 9.5200 | 11.0022 | -1.4821 |
| 1428277_at   | Otud6b        | OTU domain containing 6B                                                               | AK011203  | 8.4803 | 9.9646  | -1.4843 |
| 1435402_at   | Gramd1b       | GRAM domain containing 1B                                                              | BB066186  | 6.0649 | 7.5511  | -1.4861 |



|              |               |                                                                                        |           |         |         |         |
|--------------|---------------|----------------------------------------------------------------------------------------|-----------|---------|---------|---------|
| 1450454_at   | Tor3a         | torsin family 3, member A                                                              | NM_023141 | 5.4771  | 6.9643  | -1.4872 |
| 1428833_at   | 4930406D14Rik | RIKEN cDNA 4930406D14 gene                                                             | AU022823  | 6.3554  | 7.8427  | -1.4874 |
| 1455508_at   | Slc35e2       | solute carrier family 35, member E2                                                    | BF318246  | 8.2581  | 9.7461  | -1.4879 |
| 1435670_at   | Tfap2b        | transcription factor AP-2 beta                                                         | AV237028  | 3.7032  | 5.1918  | -1.4886 |
| 1442393_at   |               |                                                                                        | BB488200  | 3.7420  | 5.2306  | -1.4886 |
| 1430758_x_at | Bcas1         | breast carcinoma amplified sequence 1                                                  | AK020254  | 4.4702  | 5.9590  | -1.4888 |
| 1417505_s_at |               |                                                                                        | BC004619  | 6.8784  | 8.3672  | -1.4889 |
| 1448020_at   | Rap1a         | RAS-related protein-1a                                                                 | AA210264  | 7.9260  | 9.4152  | -1.4891 |
| 1435194_at   | Hspa4         | heat shock protein 4                                                                   | AW909503  | 8.0903  | 9.5803  | -1.4900 |
| 1424455_at   | Gprasp1       | G protein-coupled receptor associated sorting protein 1                                | BC027187  | 6.8509  | 8.3418  | -1.4909 |
| 1425605_a_at | Lmbr1         | limb region 1                                                                          | AF190665  | 4.5808  | 6.0719  | -1.4911 |
| 1425321_a_at | Clmn          | calmin                                                                                 | AB059644  | 4.2333  | 5.7245  | -1.4912 |
| 1428929_s_at | Slc25a26      | solute carrier family 25 (mitochondrial carrier, phosphate carrier), member 26         | BC019170  | 6.1336  | 7.6258  | -1.4922 |
| 1429073_at   | 2210015D19Rik | RIKEN cDNA 2210015D19 gene                                                             | AK005556  | 6.2392  | 7.7316  | -1.4924 |
| 1455316_x_at | BC094435      | cDNA sequence BC094435                                                                 | AI987693  | 11.7546 | 13.2471 | -1.4926 |
| 1428897_at   | 2610029I01Rik | RIKEN cDNA 2610029I01 gene                                                             | AK011611  | 7.2750  | 8.7700  | -1.4950 |
| 1424510_at   | Nudt6         | nudix (nucleoside diphosphate linked moiety X)-type motif 6                            | BC027267  | 5.5631  | 7.0594  | -1.4963 |
| 1424544_at   | Nrbp2         | nuclear receptor binding protein 2                                                     | BC012437  | 5.9590  | 7.4557  | -1.4966 |
| 1416677_at   | Apoh          | apolipoprotein H                                                                       | NM_013475 | 4.2966  | 5.7934  | -1.4968 |
| 1453481_at   | Zdhhc2        | zinc finger, DHHC domain containing 2                                                  | BB342242  | 4.8229  | 6.3197  | -1.4968 |
| 1421682_a_at |               |                                                                                        | NM_011560 | 3.5127  | 5.0107  | -1.4980 |
| 1459740_s_at | Ucp2          | uncoupling protein 2 (mitochondrial, proton carrier)                                   | AW108044  | 6.1615  | 7.6597  | -1.4982 |
| 1422432_at   | Dbi           | diazepam binding inhibitor                                                             | NM_007830 | 11.3822 | 12.8813 | -1.4991 |
| 1423100_at   | Fos           | FBJ osteosarcoma oncogene                                                              | AV026617  | 10.6425 | 12.1417 | -1.4992 |
| 1426508_at   | Gfap          | glial fibrillary acidic protein                                                        | BB183081  | 4.7207  | 6.2200  | -1.4993 |
| 1422787_at   | Fkbpl         | FK506 binding protein-like                                                             | NM_019873 | 6.1528  | 7.6525  | -1.4997 |
| 1437132_x_at | Nedd9         | neural precursor cell expressed, developmentally down-regulated gene 9                 | BB535494  | 8.3874  | 9.8875  | -1.5002 |
| 1433742_at   | Kank1         | KN motif and ankyrin repeat domains 1                                                  | BQ032773  | 6.5268  | 8.0272  | -1.5004 |
| 1435186_s_at | Lrrcc1        | leucine rich repeat and coiled-coil domain containing 1                                | BF466265  | 5.4443  | 6.9450  | -1.5006 |
| 1438730_at   | Nav1          | neuron navigator 1                                                                     | BB431371  | 6.0062  | 7.5068  | -1.5006 |
| 1416982_at   | Foxo1         | forkhead box O1                                                                        | AI462296  | 5.7818  | 7.2842  | -1.5024 |
| 1438195_at   | Gpd1l         | glycerol-3-phosphate dehydrogenase 1-like                                              | BB727537  | 6.7665  | 8.2707  | -1.5042 |
| 1443640_at   | Zfp882        | zinc finger protein 882                                                                | BB831078  | 3.9401  | 5.4443  | -1.5043 |
| 1417538_at   | Slc35a1       | solute carrier family 35 (CMP-sialic acid transporter), member 1                       | NM_011895 | 8.4388  | 9.9433  | -1.5045 |
| 1434809_at   | Arhgap28      | Rho GTPase activating protein 28                                                       | BB458819  | 7.3700  | 8.8751  | -1.5052 |
| 1415793_at   | Pnpo          | pyridoxine 5'-phosphate oxidase                                                        | NM_134021 | 6.7252  | 8.2309  | -1.5058 |
| 1424003_at   | 4930444A02Rik | RIKEN cDNA 4930444A02 gene                                                             | BC027296  | 6.7785  | 8.2848  | -1.5063 |
| 1449099_at   | Lrba          | LPS-responsive beige-like anchor                                                       | NM_030695 | 6.5166  | 8.0237  | -1.5070 |
| 1441178_at   | Dtwd2         | DTW domain containing 2                                                                | BB818617  | 4.2966  | 5.8041  | -1.5075 |
| 1428540_at   | Fam115a       | family with sequence similarity 115, member A                                          | BE944524  | 7.0916  | 8.6000  | -1.5084 |
| 1429723_at   | 6330409N04Rik | RIKEN cDNA 6330409N04 gene                                                             | AK018153  | 7.0090  | 8.5178  | -1.5088 |
| 1435361_at   | Sema3g        | sema domain, immunoglobulin domain (Ig), short basic domain, secreted, (semaphorin) 3G | BB535044  | 4.1932  | 5.7023  | -1.5090 |
| 1455179_at   | Mpp7          | membrane protein, palmitoylated 7 (MAGUK p55 subfamily member 7)                       | BG066186  | 6.0047  | 7.5139  | -1.5092 |
| 1449730_s_at | Fzd3          | frizzled homolog 3 (Drosophila)                                                        | AU020229  | 5.6953  | 7.2050  | -1.5097 |
| 1443924_at   | Wnk3-ps       | WNK lysine deficient protein kinase 3, pseudogene                                      | BB084132  | 5.3765  | 6.8870  | -1.5105 |
| 1416487_a_at | Yap1          | yes-associated protein 1                                                               | NM_009534 | 7.0061  | 8.5178  | -1.5117 |
| 1422827_x_at | Slc35a2       | solute carrier family 35 (UDP-galactose transporter), member A2                        | NM_078484 | 6.7673  | 8.2802  | -1.5129 |
| 1416192_at   | Napa          | N-ethylmaleimide sensitive fusion protein attachment protein alpha                     | BC004804  | 5.6593  | 7.1724  | -1.5131 |
| 1441910_x_at | Ccne1         | cyclin E1                                                                              | BB293079  | 8.6606  | 10.1739 | -1.5134 |
| 1437831_at   | Zcchc4        | zinc finger, CCHC domain containing 4                                                  | BB834670  | 5.1383  | 6.6523  | -1.5140 |
| 1420798_s_at |               |                                                                                        | NM_054072 | 3.5815  | 5.0970  | -1.5155 |
| 1432059_x_at | 5031425E22Rik | RIKEN cDNA 5031425E22 gene                                                             | AK017143  | 5.7247  | 7.2404  | -1.5157 |
| 1424714_at   | Aldoc         | aldolase C, fructose-bisphosphate                                                      | BC008184  | 4.2623  | 5.7781  | -1.5158 |
| 1424068_at   | Tcta          | T cell leukemia translocation altered gene                                             | BC019397  | 4.8036  | 6.3197  | -1.5161 |

|              |               |                                                                                                                  |           |         |         |         |
|--------------|---------------|------------------------------------------------------------------------------------------------------------------|-----------|---------|---------|---------|
| 1433771_at   | Fam108b       | family with sequence similarity 108, member B                                                                    | AV173092  | 9.2765  | 10.7928 | -1.5163 |
| 1418565_at   | Serbp1        | serpine1 mRNA binding protein 1                                                                                  | BC006030  | 5.8307  | 7.3475  | -1.5168 |
| 1418004_a_at | Tmem176b      | transmembrane protein 176B                                                                                       | NM_023056 | 9.2464  | 10.7637 | -1.5172 |
| 1438666_at   | Ldlrad3       | low density lipoprotein receptor class A domain containing 3                                                     | BB534423  | 7.6738  | 9.1917  | -1.5179 |
| 1428176_at   | S1pr2         | sphingosine-1-phosphate receptor 2                                                                               | AK003144  | 8.3541  | 9.8722  | -1.5182 |
| 1436440_at   | Slc25a12      | solute carrier family 25 (mitochondrial carrier, Aralar), member 12                                              | BB303952  | 5.0544  | 6.5730  | -1.5186 |
| 1431726_a_at | Tmem80        | transmembrane protein 80                                                                                         | AK017460  | 5.5094  | 7.0284  | -1.5189 |
| 1460468_s_at | Dnajc22       | DnaJ (Hsp40) homolog, subfamily C, member 22                                                                     | BB667713  | 5.9187  | 7.4391  | -1.5205 |
| 1444982_at   | C230007H23Rik | RIKEN cDNA C230007H23 gene                                                                                       | BB380551  | 4.3588  | 5.8795  | -1.5208 |
| 1417283_at   | Lynx1         | Ly6/neurotoxin 1                                                                                                 | NM_011838 | 5.8632  | 7.3854  | -1.5222 |
| 1439966_x_at | Sfxn2         | sideroflexin 2                                                                                                   | AV213621  | 5.7245  | 7.2467  | -1.5222 |
| 1448715_x_at |               |                                                                                                                  | NM_010490 | 12.0905 | 13.6137 | -1.5232 |
| 1452411_at   | Lrrc1         | leucine rich repeat containing 1                                                                                 | BG966295  | 6.0268  | 7.5511  | -1.5243 |
| 1416452_at   | Oat           | ornithine aminotransferase                                                                                       | BC008119  | 10.4744 | 12.0002 | -1.5258 |
| 1436048_at   | Exoc8         | exocyst complex component 8                                                                                      | BG074367  | 6.8965  | 8.4229  | -1.5265 |
| 1442587_at   |               |                                                                                                                  | BB451946  | 3.7420  | 5.2685  | -1.5265 |
| 1433500_at   | Dennd2a       | DENN/MADD domain containing 2A                                                                                   | AV260555  | 7.7582  | 9.2851  | -1.5269 |
| 1420824_at   | Sema4d        | sema domain, immunoglobulin domain (Ig), transmembrane domain (TM) and short cytoplasmic domain, (semaphorin) 4D | AV256403  | 6.2879  | 7.8151  | -1.5272 |
| 1460567_at   | Rfx7          | regulatory factor X, 7                                                                                           | BB148972  | 8.3032  | 9.8306  | -1.5274 |
| 1420615_at   | Ash2l         | ash2 (absent, small, or homeotic)-like (Drosophila)                                                              | BM207355  | 5.8888  | 7.4168  | -1.5280 |
| 1453232_at   | Calr3         | calreticulin 3                                                                                                   | AK006582  | 4.2163  | 5.7446  | -1.5283 |
| 1460531_at   |               |                                                                                                                  | AK013759  | 5.6925  | 7.2212  | -1.5287 |
| 1434500_at   | Ttyh2         | tweety homolog 2 (Drosophila)                                                                                    | BF585303  | 8.4507  | 9.9795  | -1.5288 |
| 1436034_at   | Cep68         | centrosomal protein 68                                                                                           | AW550283  | 8.6081  | 10.1375 | -1.5294 |
| 1456853_at   | Gm4924        | predicted gene 4924                                                                                              | BM235636  | 4.5680  | 6.0989  | -1.5309 |
| 1420411_a_at | Pi4k2b        | phosphatidylinositol 4-kinase type 2 beta                                                                        | NM_028744 | 8.4159  | 9.9483  | -1.5324 |
| 1418346_at   | Insl6         | insulin-like 6                                                                                                   | NM_013754 | 6.4073  | 7.9398  | -1.5326 |
| 1437066_at   | Zbtb20        | zinc finger and BTB domain containing 20                                                                         | BQ174376  | 6.1404  | 7.6739  | -1.5335 |
| 1430394_a_at | Abcb9         | ATP-binding cassette, sub-family B (MDR/TAP), member 9                                                           | AK020749  | 4.5643  | 6.0989  | -1.5347 |
| 1421843_at   | Il1rap        | interleukin 1 receptor accessory protein                                                                         | BE285634  | 4.7667  | 6.3015  | -1.5348 |
| 1416199_at   | Kifc3         | kinesin family member C3                                                                                         | NM_010631 | 7.6668  | 9.2018  | -1.5350 |
| 1436796_at   |               |                                                                                                                  | BB237072  | 7.5078  | 9.0431  | -1.5354 |
| 1457709_a_at | A930005H10Rik | RIKEN cDNA A930005H10 gene                                                                                       | BF318375  | 4.7495  | 6.2849  | -1.5354 |
| 1435529_at   | Gm14446       | predicted gene 14446                                                                                             | BM245961  | 4.4196  | 5.9553  | -1.5357 |
| 1418634_at   | Notch1        | notch 1                                                                                                          | NM_008714 | 7.8447  | 9.3806  | -1.5358 |
| 1416260_a_at | Snx1          | sorting nexin 1                                                                                                  | NM_019727 | 8.7444  | 10.2817 | -1.5373 |
| 1439511_at   | Cdk7          | cyclin-dependent kinase 7                                                                                        | AV234027  | 6.5962  | 8.1350  | -1.5388 |
| 1429759_at   | Rps6ka6       | ribosomal protein S6 kinase polypeptide 6                                                                        | BB449218  | 6.0989  | 7.6381  | -1.5392 |
| 1437753_at   | 6230409E13Rik | RIKEN cDNA 6230409E13 gene                                                                                       | BE987651  | 5.2534  | 6.7928  | -1.5394 |
| 1424123_at   | Mfsd7c        | major facilitator superfamily domain containing 7C                                                               | BC011209  | 5.2306  | 6.7709  | -1.5403 |
| 1424872_at   | Zfp932        | zinc finger protein 932                                                                                          | BC012405  | 6.9332  | 8.4738  | -1.5406 |
| 1427604_a_at | Atp9a         | ATPase, class II, type 9A                                                                                        | AF011336  | 4.5552  | 6.0964  | -1.5412 |
| 1420485_at   | Nol7          | nucleolar protein 7                                                                                              | AW060738  | 5.4974  | 7.0394  | -1.5420 |
| 1425792_a_at | Rorc          | RAR-related orphan receptor gamma                                                                                | AJ132394  | 3.8342  | 5.3765  | -1.5423 |
| 1456504_at   | Zfp182        | zinc finger protein 182                                                                                          | BM248637  | 4.9195  | 6.4620  | -1.5425 |
| 1429870_at   | Tnik          | TRAF2 and NCK interacting kinase                                                                                 | BB021125  | 3.7535  | 5.2964  | -1.5429 |
| 1452728_at   | Kirrel3       | kin of IRRE like 3 (Drosophila)                                                                                  | AK005197  | 3.5815  | 5.1247  | -1.5432 |
| 1450698_at   | Dusp2         | dual specificity phosphatase 2                                                                                   | L11330    | 7.0210  | 8.5656  | -1.5446 |
| 1451117_a_at | Tom11l        | target of myb1-like 1 (chicken)                                                                                  | BC004710  | 4.5329  | 6.0777  | -1.5448 |
| 1457287_at   |               |                                                                                                                  | BQ031062  | 5.0425  | 6.5881  | -1.5456 |
| 1418162_at   | Tlr4          | toll-like receptor 4                                                                                             | AF185285  | 5.8311  | 7.3768  | -1.5458 |
| 1451199_at   | Qtrtd1        | queuine tRNA-ribosyltransferase domain containing 1                                                              | BC017628  | 7.5278  | 9.0740  | -1.5462 |
| 1455038_at   | 5730471H19Rik | RIKEN cDNA 5730471H19 gene                                                                                       | AV299818  | 6.1054  | 7.6525  | -1.5471 |
| 1455073_at   | Cdadcl1       | cytidine and dCMP deaminase domain containing 1                                                                  | BB178837  | 5.3483  | 6.8954  | -1.5472 |
| 1435924_at   | Tfb1m         | transcription factor B1, mitochondrial                                                                           | AW551319  | 5.6105  | 7.1586  | -1.5481 |
| 1418510_s_at | Fbxo8         | F-box protein 8                                                                                                  | NM_015791 | 7.7028  | 9.2520  | -1.5492 |

|              |               |                                                                                       |           |        |         |         |
|--------------|---------------|---------------------------------------------------------------------------------------|-----------|--------|---------|---------|
| 1438532_at   | Hmcn1         | hemicentin 1                                                                          | BB024475  | 3.9798 | 5.5301  | -1.5503 |
| 1426494_at   | Trmt10b       | tRNA methyltransferase 10 homolog B (S. cerevisiae)                                   | AV161118  | 6.6707 | 8.2218  | -1.5511 |
| 1460434_at   | Fundc2        | FUN14 domain containing 2                                                             | AI510221  | 7.3931 | 8.9461  | -1.5530 |
| 1434068_s_at | AI662270      | expressed sequence AI662270                                                           | BE688410  | 8.7410 | 10.2941 | -1.5530 |
| 1452633_s_at | Aak1          | AP2 associated kinase 1                                                               | BG229246  | 7.6386 | 9.1920  | -1.5534 |
| 1427073_at   | Lace1         | lactation elevated 1                                                                  | AF397909  | 5.8462 | 7.3998  | -1.5536 |
| 1441174_a_at | Lmln          | leishmanolysin-like (metallopeptidase M8 family)                                      | BB182358  | 4.2674 | 5.8212  | -1.5538 |
| 1449022_at   | Nes           | nestin                                                                                | AI413223  | 8.0939 | 9.6496  | -1.5557 |
| 1443978_at   | Ankle1        | ankyrin repeat and LEM domain containing 1                                            | BB407885  | 6.0351 | 7.5915  | -1.5564 |
| 1451571_s_at |               |                                                                                       | BC010442  | 6.2541 | 7.8106  | -1.5565 |
| 1423858_a_at | Hmgcs2        | 3-hydroxy-3-methylglutaryl-Coenzyme A synthase 2                                      | BC014714  | 4.3848 | 5.9418  | -1.5571 |
| 1428573_at   | Chn2          | chimerin (chimaerin) 2                                                                | AK006398  | 3.6732 | 5.2306  | -1.5575 |
| 1434935_at   | Aak1          | AP2 associated kinase 1                                                               | BG067888  | 9.9790 | 11.5370 | -1.5580 |
| 1439129_at   | Dock5         | dedicator of cytokinesis 5                                                            | AW495734  | 4.5566 | 6.1150  | -1.5584 |
| 1452632_at   | Aak1          | AP2 associated kinase 1                                                               | BG229246  | 5.7369 | 7.2957  | -1.5588 |
| 1428485_at   | Car12         | carbonic anhydrase 12                                                                 | AK009873  | 5.1166 | 6.6757  | -1.5591 |
| 1425896_a_at | Fbn1          | fibrillin 1                                                                           | AF007248  | 4.7782 | 6.3376  | -1.5594 |
| 1434298_at   | Zeb2          | zinc finger E-box binding homeobox 2                                                  | BQ174116  | 6.9450 | 8.5047  | -1.5597 |
| 1434179_at   | Mll3          | myeloid/lymphoid or mixed-lineage leukemia 3                                          | AV297525  | 7.0954 | 8.6554  | -1.5600 |
| 1452159_at   | 2310001A20Rik | RIKEN cDNA 2310001A20 gene                                                            | AJ310638  | 7.8748 | 9.4353  | -1.5605 |
| 1424263_at   | Aif1l         | allograft inflammatory factor 1-like                                                  | BC024599  | 7.1586 | 8.7207  | -1.5621 |
| 1453246_at   | Rab39b        | RAB39B, member RAS oncogene family                                                    | AK020665  | 5.1082 | 6.6707  | -1.5624 |
| 1452244_at   | 6330406115Rik | RIKEN cDNA 6330406115 gene                                                            | AK018128  | 3.8985 | 5.4613  | -1.5628 |
| 1445667_at   | Tbc1d10a      | TBC1 domain family, member 10a                                                        | BM939155  | 4.4971 | 6.0604  | -1.5633 |
| 1452289_a_at | Rnf135        | ring finger protein 135                                                               | AK010429  | 6.6507 | 8.2153  | -1.5646 |
| 1427929_a_at | Pdxk          | pyridoxal (pyridoxine, vitamin B6) kinase                                             | BG063905  | 8.6069 | 10.1727 | -1.5658 |
| 1441952_x_at | Lynx1         | Ly6/neurotoxin 1                                                                      | BB431070  | 6.6355 | 8.2023  | -1.5668 |
| 1455967_at   | Sorbs1        | sorbin and SH3 domain containing 1                                                    | BB372866  | 5.1680 | 6.7353  | -1.5673 |
| 1431017_at   | Rcbtb2        | regulator of chromosome condensation (RCC1) and BTB (POZ) domain containing protein 2 | AK013540  | 4.6127 | 6.1807  | -1.5680 |
| 1444761_at   |               |                                                                                       | AI503482  | 5.3765 | 6.9450  | -1.5684 |
| 1451749_at   | Irak4         | interleukin-1 receptor-associated kinase 4                                            | BM220651  | 5.4707 | 7.0394  | -1.5686 |
| 1433506_at   | Lrrc8d        | leucine rich repeat containing 8D                                                     | BB315861  | 7.2252 | 8.7940  | -1.5688 |
| 1451148_at   | Pink1         | PTEN induced putative kinase 1                                                        | AF316872  | 8.2224 | 9.7921  | -1.5697 |
| 1449482_at   | Hist3h2ba     | histone cluster 3, H2ba                                                               | NM_030082 | 4.6674 | 6.2374  | -1.5699 |
| 1435469_at   | Qsox2         | quiescin Q6 sulfhydryl oxidase 2                                                      | BM237031  | 7.1698 | 8.7410  | -1.5713 |
| 1460615_at   | Nt5dc1        | 5'-nucleotidase domain containing 1                                                   | BM228837  | 6.8189 | 8.3903  | -1.5715 |
| 1418658_at   | Fam82b        | family with sequence similarity 82, member B                                          | BC025158  | 6.5111 | 8.0833  | -1.5722 |
| 1433436_s_at | Thtpa         | thiamine triphosphatase                                                               | BB350618  | 6.9506 | 8.5231  | -1.5725 |
| 1416320_at   | Sec22a        | SEC22 vesicle trafficking protein homolog A (S. cerevisiae)                           | NM_133704 | 6.8899 | 8.4630  | -1.5731 |
| 1449012_s_at | Fndc4         | fibronectin type III domain containing 4                                              | BC027164  | 6.4809 | 8.0564  | -1.5755 |
| 1429258_at   | A030001D20Rik | RIKEN cDNA A030001D20 gene                                                            | AK003910  | 5.9590 | 7.5356  | -1.5766 |
| 1451426_at   | Dhx58         | DEXH (Asp-Glu-X-His) box polypeptide 58                                               | AF316999  | 7.8215 | 9.3999  | -1.5784 |
| 1424988_at   | Mylip         | myosin regulatory light chain interacting protein                                     | BC010206  | 8.7216 | 10.3014 | -1.5798 |
| 1435539_at   | Htt           | huntingtin                                                                            | BE947966  | 6.6421 | 8.2229  | -1.5809 |
| 1424135_at   | Rspry1        | ring finger and SPRY domain containing 1                                              | BG073177  | 7.9081 | 9.4891  | -1.5810 |
| 1433789_at   | Snhg3         | small nucleolar RNA host gene (non-protein coding) 3                                  | BI082172  | 7.2818 | 8.8628  | -1.5810 |
| 1449066_a_at | Arhgef7       | Rho guanine nucleotide exchange factor (GEF7)                                         | NM_017402 | 7.9457 | 9.5272  | -1.5815 |
| 1419320_at   | Chst5         | carbohydrate (N-acetylglucosamine 6-O) sulfotransferase 5                             | NM_019950 | 4.8244 | 6.4073  | -1.5828 |
| 1436341_at   | Hmbox1        | homeobox containing 1                                                                 | BM125569  | 5.3611 | 6.9450  | -1.5838 |
| 1434557_at   | Hip1          | huntingtin interacting protein 1                                                      | BB794880  | 7.1259 | 8.7098  | -1.5840 |
| 1424373_at   | Armxc3        | armadillo repeat containing, X-linked 3                                               | AK004598  | 8.2023 | 9.7866  | -1.5843 |
| 1415780_a_at | Armxc2        | armadillo repeat containing, X-linked 2                                               | NM_026139 | 8.8430 | 10.4279 | -1.5849 |
| 1455617_at   | Lmbrd1        | LMBR1 domain containing 1                                                             | AV370003  | 6.1807 | 7.7674  | -1.5866 |
| 1460329_at   | B4galt6       | UDP-Gal:betaGlcNAc beta 1,4-galactosyltransferase, polypeptide 6                      | BG066773  | 7.6002 | 9.1870  | -1.5868 |
| 1447988_at   |               |                                                                                       | AW208869  | 4.6952 | 6.2831  | -1.5879 |
| 1455401_at   | Camkk2        | calcium/calmodulin-dependent protein kinase kinase 2, beta                            | AW061083  | 6.6872 | 8.2755  | -1.5883 |
| 1416492_at   | Ccne1         | cyclin E1                                                                             | NM_007633 | 7.5844 | 9.1729  | -1.5885 |

|              |               |                                                                                          |           |        |         |         |
|--------------|---------------|------------------------------------------------------------------------------------------|-----------|--------|---------|---------|
| 1456141_x_at | Brcc3         | BRCA1/BRCA2-containing complex, subunit 3                                                | BB751098  | 4.1076 | 5.6970  | -1.5894 |
| 1425731_at   | Ankrd24       | ankyrin repeat domain 24                                                                 | BC017633  | 7.0182 | 8.6076  | -1.5894 |
| 1437953_at   | Gpcpd1        | glycerophosphocholine phosphodiesterase<br>GDE1 homolog ( <i>S. cerevisiae</i> )         | BM246706  | 3.7420 | 5.3323  | -1.5903 |
| 1441975_at   | Acpp          | acid phosphatase, prostate                                                               | BB008092  | 4.4937 | 6.0844  | -1.5907 |
| 1433582_at   | 1190002N15Rik | RIKEN cDNA 1190002N15 gene                                                               | AV309085  | 7.4308 | 9.0220  | -1.5912 |
| 1422527_at   | H2-DMa        | histocompatibility 2, class II, locus DMa                                                | NM_010386 | 5.3414 | 6.9332  | -1.5918 |
| 1434618_at   | Crebzf        | CREB/ATF bZIP transcription factor                                                       | AA123443  | 5.9590 | 7.5511  | -1.5920 |
| 1418984_at   | Inadl         | InaD-like ( <i>Drosophila</i> )                                                          | AV287690  | 4.5684 | 6.1607  | -1.5924 |
| 1452865_at   | Lrrc27        | leucine rich repeat containing 27                                                        | AK009798  | 4.8809 | 6.4737  | -1.5928 |
| 1424370_s_at | Psmf1         | proteasome (prosome, macropain) inhibitor<br>subunit 1                                   | BC012260  | 6.4343 | 8.0272  | -1.5929 |
| 1420363_at   | Bik           | BCL2-interacting killer                                                                  | NM_007546 | 4.6265 | 6.2200  | -1.5935 |
| 1449244_at   | Cdh2          | cadherin 2                                                                               | BC022107  | 8.6722 | 10.2659 | -1.5936 |
| 1441054_at   | Apol8         | apolipoprotein L 8                                                                       | BB312717  | 3.6289 | 5.2240  | -1.5951 |
| 1458438_at   | Ccdc122       | coiled-coil domain containing 122                                                        | AW554226  | 7.2562 | 8.8524  | -1.5962 |
| 1435270_x_at | N6amt2        | N-6 adenine-specific DNA methyltransferase 2<br>(putative)                               | BF730076  | 7.4308 | 9.0276  | -1.5968 |
| 1433827_at   | Atp8a1        | ATPase, aminophospholipid transporter (APLT),<br>class I, type 8A, member 1              | AW610650  | 6.5656 | 8.1624  | -1.5968 |
| 1425658_at   | Cd109         | CD109 antigen                                                                            | AY083458  | 7.7551 | 9.3529  | -1.5978 |
| 1424408_at   | Lims2         | LIM and senescent cell antigen like domains 2                                            | BC010816  | 6.0993 | 7.6973  | -1.5980 |
| 1424474_a_at | Camkk2        | calcium/calmodulin-dependent protein kinase<br>kinase 2, beta                            | BI157430  | 7.8125 | 9.4106  | -1.5981 |
| 1453863_at   | 3300002P09Rik | RIKEN cDNA 3300002P09 gene                                                               | AI430424  | 4.1251 | 5.7245  | -1.5994 |
| 1437449_at   | Rsad1         | radical S-adenosyl methionine domain<br>containing 1                                     | BB818348  | 6.4641 | 8.0639  | -1.5997 |
| 1426802_at   | 8-Sep         | septin 8                                                                                 | BB756379  | 6.4457 | 8.0455  | -1.5998 |
| 1459051_at   | 6530418L21Rik | RIKEN cDNA 6530418L21 gene                                                               | BB781615  | 5.2306 | 6.8313  | -1.6007 |
| 1455437_at   | Sik3          | SIK family kinase 3                                                                      | AV369969  | 8.4890 | 10.0904 | -1.6015 |
| 1456197_x_at | Ajap1         | adherens junction associated protein 1                                                   | BB342782  | 5.7747 | 7.3768  | -1.6021 |
| 1451085_at   | C030006K11Rik | RIKEN cDNA C030006K11 gene                                                               | BC019462  | 5.0107 | 6.6129  | -1.6022 |
| 1454623_at   | Cpa2          | carboxypeptidase A2, pancreatic                                                          | BG141511  | 5.2415 | 6.8439  | -1.6024 |
| 1447878_s_at | Fgfr1         | fibroblast growth factor receptor-like 1                                                 | BB109694  | 9.8773 | 11.4803 | -1.6029 |
| 1452878_at   | Prkce         | protein kinase C, epsilon                                                                | AK017901  | 6.6089 | 8.2121  | -1.6032 |
| 1449229_a_at | Cdkl2         | cyclin-dependent kinase-like 2 (CDC2-related<br>kinase)                                  | NM_016912 | 5.9475 | 7.5511  | -1.6035 |
| 1433705_at   | Zfp213        | zinc finger protein 213                                                                  | BG066277  | 5.3685 | 6.9758  | -1.6074 |
| 1435040_at   | Irak3         | interleukin-1 receptor-associated kinase 3                                               | AV228493  | 3.5815 | 5.1918  | -1.6103 |
| 1452831_s_at | Ppat          | phosphoribosyl pyrophosphate<br>amidotransferase                                         | AV305746  | 8.7500 | 10.3611 | -1.6110 |
| 1431226_a_at | Fndc4         | fibronectin type III domain containing 4                                                 | AK013203  | 7.2098 | 8.8208  | -1.6111 |
| 1441235_at   | Nup133        | nucleoporin 133                                                                          | BM942872  | 4.6206 | 6.2346  | -1.6140 |
| 1456103_at   | Pml           | promyelocytic leukemia                                                                   | BB667149  | 6.3214 | 7.9359  | -1.6145 |
| 1433798_a_at | E330034G19Rik | RIKEN cDNA E330034G19 gene                                                               | BG067232  | 4.0261 | 5.6409  | -1.6148 |
| 1421217_a_at | Lgals9        | lectin, galactose binding, soluble 9                                                     | NM_010708 | 8.5732 | 10.1888 | -1.6157 |
| 1416571_at   | Traf4         | TNF receptor associated factor 4                                                         | NM_009423 | 5.1786 | 6.7945  | -1.6159 |
| 1430286_s_at |               |                                                                                          | AK013448  | 8.3344 | 9.9506  | -1.6162 |
| 1437077_at   | Dcun1d2       | DCN1, defective in cullin neddylation 1, domain<br>containing 2 ( <i>S. cerevisiae</i> ) | AV300673  | 6.8303 | 8.4466  | -1.6162 |
| 1453328_at   | 2700008G24Rik | RIKEN cDNA 2700008G24 gene                                                               | AW495672  | 4.8406 | 6.4574  | -1.6168 |
| 1454764_s_at | Slc38a1       | solute carrier family 38, member 1                                                       | BF165681  | 7.4821 | 9.1012  | -1.6191 |
| 1435503_at   | C330006K01Rik | RIKEN cDNA C330006K01 gene                                                               | AV263612  | 3.9412 | 5.5610  | -1.6198 |
| 1419872_at   | Csf1r         | colony stimulating factor 1 receptor                                                     | AI323359  | 4.5806 | 6.2005  | -1.6199 |
| 1454909_at   | Tacc1         | transforming, acidic coiled-coil containing<br>protein 1                                 | BQ176888  | 7.8998 | 9.5201  | -1.6202 |
| 1428914_at   | Sh3pxd2a      | SH3 and PX domains 2A                                                                    | AK009333  | 7.7871 | 9.4081  | -1.6210 |
| 1429639_at   | Gpcpd1        | glycerophosphocholine phosphodiesterase<br>GDE1 homolog ( <i>S. cerevisiae</i> )         | AK009137  | 4.8140 | 6.4352  | -1.6212 |
| 1436339_at   | 1810058I24Rik | RIKEN cDNA 1810058I24 gene                                                               | BE627374  | 9.9757 | 11.5982 | -1.6226 |
| 1442334_at   |               |                                                                                          | BB711873  | 4.9195 | 6.5424  | -1.6229 |
| 1433965_at   | Atp8a1        | ATPase, aminophospholipid transporter (APLT),<br>class I, type 8A, member 1              | BQ176779  | 4.8012 | 6.4242  | -1.6229 |
| 1435403_at   | 1700007L15Rik | RIKEN cDNA 1700007L15 gene                                                               | AV039549  | 5.6689 | 7.2929  | -1.6240 |
| 1451411_at   | Gprc5b        | G protein-coupled receptor, family C, group 5,<br>member B                               | BC020004  | 6.3311 | 7.9555  | -1.6244 |

|              |               |                                                                              |           |        |         |         |
|--------------|---------------|------------------------------------------------------------------------------|-----------|--------|---------|---------|
| 1458585_at   |               |                                                                              | AI506321  | 3.6807 | 5.3054  | -1.6247 |
| 1418312_at   | Zfp276        | zinc finger protein (C2H2 type) 276                                          | BB667131  | 6.2392 | 7.8642  | -1.6249 |
| 1422064_a_at | Zbtb20        | zinc finger and BTB domain containing 20                                     | AY028963  | 6.4915 | 8.1166  | -1.6251 |
| 1449558_at   | F8            | coagulation factor VIII                                                      | NM_007977 | 4.1263 | 5.7515  | -1.6253 |
| 1437743_at   | Aebp2         | AE binding protein 2                                                         | BM242614  | 7.3346 | 8.9600  | -1.6254 |
| 1419748_at   | Abcd2         | ATP-binding cassette, sub-family D (ALD), member 2                           | NM_011994 | 3.9024 | 5.5301  | -1.6277 |
| 1451878_a_at | Jmy           | junction-mediating and regulatory protein                                    | BC020052  | 5.2034 | 6.8313  | -1.6279 |
| 1437432_a_at | Trim12a       | tripartite motif-containing 12A                                              | BM244351  | 5.9478 | 7.5765  | -1.6287 |
| 1432332_a_at | Nudt19        | nudix (nucleoside diphosphate linked moiety X)-type motif 19                 | AK008430  | 6.8285 | 8.4579  | -1.6294 |
| 1416411_at   | Gstm2         | glutathione S-transferase, mu 2                                              | NM_008183 | 6.8729 | 8.5028  | -1.6299 |
| 1435637_at   | Iltf1         | integrin alpha FG-GAP repeat containing 1                                    | AW554709  | 7.6286 | 9.2587  | -1.6301 |
| 1438075_at   | Fem1c         | fem-1 homolog c (C.elegans)                                                  | BB752524  | 6.3258 | 7.9561  | -1.6303 |
| 1443471_at   | Zbtb20        | zinc finger and BTB domain containing 20                                     | BB087247  | 4.1738 | 5.8041  | -1.6304 |
| 1451644_a_at |               |                                                                              | BC010602  | 7.5539 | 9.1846  | -1.6306 |
| 1425263_a_at | Mbp           | myelin basic protein                                                         | BB181247  | 5.0107 | 6.6421  | -1.6313 |
| 1452527_a_at | P2rx4         | purinergic receptor P2X, ligand-gated ion channel 4                          | AJ251462  | 7.3455 | 8.9769  | -1.6314 |
| 1424261_at   | Zfp672        | zinc finger protein 672                                                      | BC003258  | 5.3451 | 6.9771  | -1.6321 |
| 1451159_at   | Arhgef12      | Rho guanine nucleotide exchange factor (GEF) 12                              | AF467766  | 8.2386 | 9.8707  | -1.6321 |
| 1429359_s_at | Rbpms         | RNA binding protein gene with multiple splicing                              | AK003434  | 3.7038 | 5.3360  | -1.6322 |
| 1420196_s_at | Tbc1d14       | TBC1 domain family, member 14                                                | C77429    | 9.4094 | 11.0420 | -1.6326 |
| 1448470_at   | Fbp1          | fructose biphosphatase 1                                                     | NM_019395 | 3.5307 | 5.1641  | -1.6333 |
| 1417029_a_at | Trim2         | tripartite motif-containing 2                                                | BB283676  | 4.8229 | 6.4574  | -1.6345 |
| 1419624_a_at | 1700010I14Rik | RIKEN cDNA 1700010I14 gene                                                   | NM_025851 | 3.3762 | 5.0107  | -1.6345 |
| 1429590_at   | Tacc1         | transforming, acidic coiled-coil containing protein 1                        | BE862546  | 8.0581 | 9.6927  | -1.6346 |
| 1453091_s_at | Letmd1        | LETM1 domain containing 1                                                    | BB241583  | 5.8877 | 7.5226  | -1.6349 |
| 1418409_at   | Jrk           | jerky                                                                        | NM_008415 | 5.9206 | 7.5556  | -1.6350 |
| 1442827_at   | Tlr4          | toll-like receptor 4                                                         | BB148728  | 3.7406 | 5.3759  | -1.6353 |
| 1416259_at   | Pex12         | peroxisomal biogenesis factor 12                                             | NM_134025 | 6.5242 | 8.1609  | -1.6367 |
| 1430034_at   | Cct4          | chaperonin containing Tcp1, subunit 4 (delta)                                | BE648588  | 5.0037 | 6.6421  | -1.6383 |
| 1444450_at   | Rab42-ps      | RAB42, member RAS oncogene family, pseudogene                                | BB124025  | 4.0579 | 5.6970  | -1.6391 |
| 1418798_s_at | Srpk3         | serine/arginine-rich protein specific kinase 3                               | NM_019684 | 4.8776 | 6.5197  | -1.6421 |
| 1428592_s_at | Usp38         | ubiquitin specific peptidase 38                                              | BG064874  | 6.3376 | 7.9804  | -1.6428 |
| 1459961_a_at | Stat3         | signal transducer and activator of transcription 3                           | BG069527  | 5.4561 | 7.1002  | -1.6442 |
| 1449318_at   | Tubg2         | tubulin, gamma 2                                                             | NM_134028 | 3.7997 | 5.4443  | -1.6447 |
| 1445434_at   | Snupn         | snurportin 1                                                                 | BQ176044  | 4.2704 | 5.9165  | -1.6460 |
| 1416808_at   | Nid1          | nidogen 1                                                                    | X14480    | 3.4508 | 5.0970  | -1.6462 |
| 1426782_at   | Gpr125        | G protein-coupled receptor 125                                               | BC019649  | 9.9923 | 11.6391 | -1.6468 |
| 1442693_at   | Trim5         | tripartite motif-containing 5                                                | BB271468  | 5.4443 | 7.0923  | -1.6480 |
| 1425059_at   | Prmt6         | protein arginine N-methyltransferase 6                                       | BC022899  | 6.0989 | 7.7469  | -1.6480 |
| 1431145_a_at | Cuedc2        | CUE domain containing 2                                                      | AK003457  | 8.9545 | 10.6033 | -1.6488 |
| 1447057_at   |               |                                                                              | BB343027  | 5.0452 | 6.6941  | -1.6488 |
| 1438378_at   | 1700013G23Rik | RIKEN cDNA 1700013G23 gene                                                   | AV208934  | 3.5815 | 5.2306  | -1.6492 |
| 1426245_s_at | Mapre2        | microtubule-associated protein, RP/EB family, member 2                       | BC027056  | 7.5278 | 9.1796  | -1.6518 |
| 1425515_at   | Pik3r1        | phosphatidylinositol 3-kinase, regulatory subunit, polypeptide 1 (p85 alpha) | M60651    | 5.3054 | 6.9576  | -1.6522 |
| 1424362_at   | Ppapdc3       | phosphatidic acid phosphatase type 2 domain containing 3                     | BC016136  | 4.0372 | 5.6895  | -1.6524 |
| 1449916_at   | Pbx4          | pre B cell leukemia homeobox 4                                               | NM_030555 | 4.9959 | 6.6486  | -1.6527 |
| 1439478_at   | Acot2         | acyl-CoA thioesterase 2                                                      | BB500039  | 7.0506 | 8.7034  | -1.6527 |
| 1416242_at   | Klhl13        | kelch-like 13 (Drosophila)                                                   | NM_026167 | 4.1842 | 5.8382  | -1.6539 |
| 1452935_at   |               |                                                                              | AK003736  | 5.5405 | 7.1952  | -1.6547 |
| 1443253_at   |               |                                                                              | BI076661  | 4.6990 | 6.3554  | -1.6563 |
| 1436896_at   | Ints9         | integrator complex subunit 9                                                 | AV304373  | 7.4517 | 9.1082  | -1.6565 |
| 1440799_s_at | Farp2         | FERM, RhoGEF and pleckstrin domain protein 2                                 | AI465173  | 4.9989 | 6.6564  | -1.6575 |
| 1416888_at   | Fadd          | Fas (TNFRSF6)-associated via death domain                                    | BC021400  | 6.6801 | 8.3378  | -1.6577 |
| 1438132_at   | Gm5089        | predicted gene 5089                                                          | BB355326  | 3.7349 | 5.3930  | -1.6581 |
| 1427050_at   | Txndc16       | thioredoxin domain containing 16                                             | BC027108  | 7.9201 | 9.5785  | -1.6583 |

|              |               |                                                                        |           |        |         |         |
|--------------|---------------|------------------------------------------------------------------------|-----------|--------|---------|---------|
| 1447885_x_at | Nedd9         | neural precursor cell expressed, developmentally down-regulated gene 9 | BB450608  | 4.9828 | 6.6421  | -1.6593 |
| 1417112_at   | Arl2bp        | ADP-ribosylation factor-like 2 binding protein                         | NM_024191 | 9.9236 | 11.5833 | -1.6596 |
| 1427395_a_at | Aldh1a3       | aldehyde dehydrogenase family 1, subfamily A3                          | BC026667  | 5.5255 | 7.1853  | -1.6598 |
| 1431214_at   |               |                                                                        | BG297038  | 5.5531 | 7.2147  | -1.6616 |
| 1460628_at   | Eme2          | essential meiotic endonuclease 1 homolog 2 (S. pombe)                  | AV245208  | 4.7427 | 6.4073  | -1.6645 |
| 1434498_at   | Gm1673        | predicted gene 1673                                                    | BE626727  | 7.7582 | 9.4232  | -1.6650 |
| 1452821_at   | Tia1          | Tia1 cytotoxic granule-associated RNA binding protein-like 1           | AK020218  | 6.4444 | 8.1116  | -1.6672 |
| 1435185_at   | Lrrcc1        | leucine rich repeat and coiled-coil domain containing 1                | BF466265  | 4.9601 | 6.6275  | -1.6674 |
| 1434187_at   | Alg11         | asparagine-linked glycosylation 11 (alpha-1,2-mannosyltransferase)     | AW121238  | 7.3026 | 8.9704  | -1.6678 |
| 1418536_at   | H2-Q7         | histocompatibility 2, Q region locus 7                                 | M29881    | 7.5990 | 9.2673  | -1.6683 |
| 1439932_at   | Ubxn2b        | UBX domain protein 2B                                                  | BQ174624  | 3.7420 | 5.4108  | -1.6688 |
| 1457587_at   | Kcnq5         | potassium voltage-gated channel, subfamily Q, member 5                 | BB196645  | 4.7207 | 6.3909  | -1.6702 |
| 1439561_at   | 2010012O05Rik | RIKEN cDNA 2010012O05 gene                                             | BB322051  | 4.3721 | 6.0431  | -1.6710 |
| 1452921_at   |               |                                                                        | AK006992  | 5.6970 | 7.3681  | -1.6712 |
| 1460694_s_at | Svil          | supervillin                                                            | BM203457  | 8.3378 | 10.0106 | -1.6728 |
| 1447830_s_at | Rgs2          | regulator of G-protein signaling 2                                     | BB034265  | 3.6732 | 5.3478  | -1.6746 |
| 1419089_at   | Timp3         | tissue inhibitor of metalloproteinase 3                                | BI111620  | 8.8555 | 10.5303 | -1.6748 |
| 1444005_at   |               |                                                                        | A1529516  | 4.4854 | 6.1607  | -1.6753 |
| 1418902_at   | Chid1         | chitinase domain containing 1                                          | BC006876  | 5.9004 | 7.5765  | -1.6761 |
| 1449981_a_at | Nat2          | N-acetyltransferase 2 (arylamine N-acetyltransferase)                  | NM_010874 | 6.7532 | 8.4299  | -1.6767 |
| 1426415_a_at | Trim25        | tripartite motif-containing 25                                         | A1746456  | 6.1094 | 7.7871  | -1.6777 |
| 1456790_at   | Zfp800        | zinc finger protein 800                                                | BB139169  | 6.5873 | 8.2662  | -1.6789 |
| 1455030_at   | Ptprj         | protein tyrosine phosphatase, receptor type, J                         | A1116234  | 6.5818 | 8.2612  | -1.6793 |
| 1427020_at   | Scara3        | scavenger receptor class A, member 3                                   | BC026446  | 7.0647 | 8.7444  | -1.6797 |
| 1427325_s_at | Akna          | AT-hook transcription factor                                           | BB014626  | 5.8632 | 7.5434  | -1.6802 |
| 1450080_at   | Cxx1c         | CAAX box 1C                                                            | NM_028375 | 5.3876 | 7.0683  | -1.6808 |
| 1453578_at   | Pter          | phosphotriesterase related                                             | BM939099  | 5.8115 | 7.4935  | -1.6820 |
| 1458129_at   | Rora          | RAR-related orphan receptor alpha                                      | BB559501  | 4.5566 | 6.2392  | -1.6826 |
| 1457566_at   | Zfp677        | zinc finger protein 677                                                | BB271764  | 5.6589 | 7.3417  | -1.6828 |
| 1443923_at   | Akap13        | A kinase (PRKA) anchor protein 13                                      | BB011550  | 6.0489 | 7.7318  | -1.6828 |
| 1416965_at   | Pcsk1n        | proprotein convertase subtilisin/kexin type 1 inhibitor                | AF181560  | 5.4651 | 7.1485  | -1.6834 |
| 1422665_a_at | Pcmt1         | protein-L-isoaspartate (D-aspartate) O-methyltransferase 1             | NM_008786 | 7.7351 | 9.4190  | -1.6840 |
| 1448227_at   | Grb7          | growth factor receptor bound protein 7                                 | NM_010346 | 5.6390 | 7.3238  | -1.6848 |
| 1451363_a_at | Dennd2d       | DENN/MADD domain containing 2D                                         | BC008266  | 4.6349 | 6.3197  | -1.6848 |
| 1427515_at   | Pion          | pigeon homolog (Drosophila)                                            | BB637972  | 4.5349 | 6.2200  | -1.6851 |
| 1418455_at   | Copz2         | coatamer protein complex, subunit zeta 2                               | NM_019877 | 7.6898 | 9.3764  | -1.6866 |
| 1423516_a_at | Nid2          | nidogen 2                                                              | BB781435  | 6.6275 | 8.3146  | -1.6870 |
| 1427910_at   | Cst6          | cystatin E/M                                                           | AK003744  | 6.4963 | 8.1843  | -1.6880 |
| 1453159_at   | Efhc1         | EF-hand domain (C-terminal) containing 1                               | AK006489  | 4.2727 | 5.9618  | -1.6891 |
| 1434959_at   | Dhh           | desert hedgehog                                                        | AV367068  | 6.4990 | 8.1892  | -1.6902 |
| 1427387_a_at | Itgb4         | integrin beta 4                                                        | L04678    | 6.0593 | 7.7496  | -1.6903 |
| 1429859_a_at | Arl2bp        | ADP-ribosylation factor-like 2 binding protein                         | AK006418  | 8.9421 | 10.6331 | -1.6910 |
| 1447223_at   |               |                                                                        | AW120584  | 6.8781 | 8.5694  | -1.6913 |
| 1441994_at   | Pcdhb16       | protocadherin beta 16                                                  | BB131219  | 4.0049 | 5.6970  | -1.6921 |
| 1419013_at   | Gpatch1       | G patch domain containing 1                                            | NM_026181 | 6.9947 | 8.6875  | -1.6929 |
| 1424810_at   | Tasp1         | taspase, threonine aspartase 1                                         | BC005776  | 6.6697 | 8.3629  | -1.6931 |
| 1443814_x_at | Ctsh          | cathepsin H                                                            | BB542535  | 5.0442 | 6.7379  | -1.6937 |
| 1452170_at   | Chpf2         | chondroitin polymerizing factor 2                                      | BC019714  | 6.9094 | 8.6044  | -1.6950 |
| 1430238_at   | Got111        | glutamic-oxaloacetic transaminase 1-like 1                             | AK006984  | 4.5566 | 6.2527  | -1.6961 |
| 1444028_s_at | Dock9         | dedicator of cytokinesis 9                                             | AA410148  | 9.0160 | 10.7124 | -1.6964 |
| 1434260_at   | Fchsd2        | FCH and double SH3 domains 2                                           | BB461848  | 8.0521 | 9.7499  | -1.6978 |
| 1438868_at   |               |                                                                        | AV280841  | 7.6739 | 9.3726  | -1.6987 |
| 1440200_at   | Fam184b       | family with sequence similarity 184, member B                          | BB128528  | 3.5681 | 5.2671  | -1.6990 |
| 1434178_at   | Mll3          | myeloid/lymphoid or mixed-lineage leukemia 3                           | AV297525  | 6.8298 | 8.5309  | -1.7011 |
| 1424304_at   | Tpcn2         | two pore segment channel 2                                             | BC025890  | 5.6757 | 7.3768  | -1.7012 |
| 1427347_s_at | Tubb2a        | tubulin, beta 2A class IIA                                             | BC003475  | 9.9258 | 11.6270 | -1.7012 |
| 1422216_at   | Mid2          | midline 2                                                              | AF196480  | 5.3877 | 7.0897  | -1.7020 |

|              |               |                                                                                              |           |        |         |         |
|--------------|---------------|----------------------------------------------------------------------------------------------|-----------|--------|---------|---------|
| 1449857_at   | 1200011118Rik | RIKEN cDNA 1200011118 gene                                                                   | NM_026177 | 4.9243 | 6.6275  | -1.7032 |
| 1452834_at   | Prr5l         | proline rich 5 like                                                                          | AK011178  | 4.7518 | 6.4574  | -1.7056 |
| 1445685_at   | Gas7          | growth arrest specific 7                                                                     | AI837851  | 5.7902 | 7.4966  | -1.7064 |
| 1451867_x_at | Arhgap6       | Rho GTPase activating protein 6                                                              | AF177664  | 6.2508 | 7.9573  | -1.7065 |
| 1425893_a_at | Fhit          | fragile histidine triad gene                                                                 | AF055573  | 4.0704 | 5.7795  | -1.7091 |
| 1450135_at   | Fzd3          | frizzled homolog 3 (Drosophila)                                                              | AU043193  | 5.5405 | 7.2516  | -1.7111 |
| 1428780_at   | Tha1          | threonine aldolase 1                                                                         | AK005036  | 4.9866 | 6.6981  | -1.7115 |
| 1458662_at   |               |                                                                                              | BB546123  | 4.3869 | 6.0989  | -1.7120 |
| 1450493_at   | Kiss1r        | KISS1 receptor                                                                               | BC016531  | 5.6470 | 7.3594  | -1.7124 |
| 1417009_at   | C1ra          | complement component 1, r subcomponent A                                                     | NM_023143 | 6.6204 | 8.3333  | -1.7130 |
| 1423170_at   | Taf7          | TAF7 RNA polymerase II, TATA box binding protein (TBP)-associated factor                     | AV213552  | 5.7714 | 7.4855  | -1.7141 |
| 1452646_at   | Trp53inp2     | transformation related protein 53 inducible nuclear protein 2                                | AK003956  | 7.7111 | 9.4261  | -1.7150 |
| 1448875_at   | Zhx1          | zinc fingers and homeoboxes 1                                                                | NM_009572 | 8.4758 | 10.1917 | -1.7159 |
| 1451325_at   | Fytd1         | forty-two-three domain containing 1                                                          | BC010204  | 6.4000 | 8.1166  | -1.7166 |
| 1425800_at   | Rad9b         | RAD9 homolog B (S. cerevisiae)                                                               | BC021784  | 4.1035 | 5.8212  | -1.7178 |
| 1418322_at   | Crem          | cAMP responsive element modulator                                                            | AI467599  | 4.9526 | 6.6707  | -1.7181 |
| 1436119_at   | Aldh1l2       | aldehyde dehydrogenase 1 family, member L2                                                   | BM231794  | 8.9253 | 10.6440 | -1.7187 |
| 1422965_at   | Agtrap        | angiotensin II, type I receptor-associated protein                                           | NM_009642 | 7.6073 | 9.3261  | -1.7188 |
| 1424004_x_at | 4930444A02Rik | RIKEN cDNA 4930444A02 gene                                                                   | BC027296  | 6.7665 | 8.4860  | -1.7195 |
| 1426587_a_at | Stat3         | signal transducer and activator of transcription 3                                           | AI325183  | 8.2569 | 9.9766  | -1.7197 |
| 1418677_at   | Actn3         | actinin alpha 3                                                                              | NM_013456 | 4.6074 | 6.3276  | -1.7202 |
| 1429456_a_at | Polr3e        | polymerase (RNA) III (DNA directed) polypeptide E                                            | AV251549  | 7.5032 | 9.2237  | -1.7205 |
| 1422694_at   | Ttyh1         | tweety homolog 1 (Drosophila)                                                                | NM_021324 | 3.9024 | 5.6240  | -1.7216 |
| 1452093_at   | Tmem185b      | transmembrane protein 185B                                                                   | AK010846  | 7.5380 | 9.2600  | -1.7221 |
| 1416675_s_at | Plcd1         | phospholipase C, delta 1                                                                     | NM_019676 | 6.1289 | 7.8510  | -1.7221 |
| 1452958_at   | Asphd2        | aspartate beta-hydroxylase domain containing 2                                               | AK013495  | 4.9694 | 6.6927  | -1.7234 |
| 1428574_a_at | Chn2          | chimerin (chimaerin) 2                                                                       | AK006398  | 3.8073 | 5.5308  | -1.7236 |
| 1434259_at   | Gm3925        | predicted gene 3925                                                                          | AV267027  | 4.6871 | 6.4113  | -1.7242 |
| 1445271_at   | Trim12c       | tripartite motif-containing 12C                                                              | BB433710  | 5.0107 | 6.7353  | -1.7246 |
| 1448407_at   | 4632428N05Rik | RIKEN cDNA 4632428N05 gene                                                                   | BC003967  | 5.5112 | 7.2361  | -1.7249 |
| 1419125_at   | Ptpn18        | protein tyrosine phosphatase, non-receptor type 18                                           | NM_011206 | 6.3015 | 8.0269  | -1.7254 |
| 1416263_at   | Abcb9         | ATP-binding cassette, sub-family B (MDR/TAP), member 9                                       | AB045382  | 4.7588 | 6.4845  | -1.7257 |
| 1421456_at   | P2ry1         | purinergic receptor P2Y, G-protein coupled 1                                                 | NM_008772 | 4.3711 | 6.0969  | -1.7257 |
| 1452654_at   | Zdhhc2        | zinc finger, DHHC domain containing 2                                                        | BB224658  | 7.4096 | 9.1358  | -1.7262 |
| 1460053_at   | Smyd4         | SET and MYND domain containing 4                                                             | BB021163  | 7.5757 | 9.3050  | -1.7293 |
| 1421935_at   | Rps20         | ribosomal protein S20                                                                        | BG070206  | 5.2737 | 7.0061  | -1.7324 |
| 1450992_a_at | Meis1         | Meis homeobox 1                                                                              | AW547821  | 4.6206 | 6.3543  | -1.7337 |
| 1450932_s_at | Dock9         | dedicator of cytokinesis 9                                                                   | BB795072  | 8.7410 | 10.4763 | -1.7353 |
| 1440454_at   | Pion          | pigeon homolog (Drosophila)                                                                  | AV377136  | 4.2333 | 5.9711  | -1.7378 |
| 1426936_at   |               |                                                                                              | BC002257  | 8.5497 | 10.2876 | -1.7379 |
| 1428917_at   | Stx17         | syntaxin 17                                                                                  | AK018158  | 6.7079 | 8.4466  | -1.7386 |
| 1453261_at   | 2610035D17Rik | RIKEN cDNA 2610035D17 gene                                                                   | BB760848  | 5.6402 | 7.3799  | -1.7397 |
| 1449118_at   | Dbt           | dihydrolipoamide branched chain transacylase E2                                              | NM_010022 | 6.8332 | 8.5732  | -1.7400 |
| 1437087_at   | 2210408K08Rik | RIKEN cDNA 2210408K08 gene                                                                   | AV079268  | 9.6534 | 11.3935 | -1.7401 |
| 1459807_x_at | P4htm         | prolyl 4-hydroxylase, transmembrane (endoplasmic reticulum)                                  | BB306202  | 5.2306 | 6.9711  | -1.7404 |
| 1452770_at   | Vkorc1        | vitamin K epoxide reductase complex, subunit 1                                               | AK003237  | 9.5873 | 11.3280 | -1.7407 |
| 1417965_at   | Plekha1       | pleckstrin homology domain containing, family A (phosphoinositide binding specific) member 1 | NM_133942 | 8.9244 | 10.6652 | -1.7408 |
| 1417545_at   | Trpv4         | transient receptor potential cation channel, subfamily V, member 4                           | NM_022017 | 5.3765 | 7.1176  | -1.7411 |
| 1421550_a_at | Trim34a       | tripartite motif-containing 34A                                                              | NM_030684 | 5.9309 | 7.6739  | -1.7430 |
| 1417311_at   | Crip2         | cysteine rich protein 2                                                                      | NM_024223 | 7.4836 | 9.2277  | -1.7441 |
| 1460371_at   | Hspa12b       | heat shock protein 12B                                                                       | BC011103  | 4.8229 | 6.5676  | -1.7447 |
| 1434511_at   | Phkb          | phosphorylase kinase beta                                                                    | BM233125  | 8.2165 | 9.9632  | -1.7467 |
| 1447471_at   |               |                                                                                              | AW112074  | 6.1147 | 7.8634  | -1.7487 |
| 1454857_at   | Rnf122        | ring finger protein 122                                                                      | AW551457  | 6.6045 | 8.3551  | -1.7505 |
| 1427912_at   | Cbr3          | carbonyl reductase 3                                                                         | AK003232  | 6.1451 | 7.8991  | -1.7540 |
| 1437217_at   | Ankrd6        | ankyrin repeat domain 6                                                                      | BM225135  | 5.8297 | 7.5840  | -1.7543 |
| 1449836_x_at | Bik           | BCL2-interacting killer                                                                      | NM_007546 | 5.6138 | 7.3681  | -1.7544 |

|              |               |                                                                                                |           |         |         |         |
|--------------|---------------|------------------------------------------------------------------------------------------------|-----------|---------|---------|---------|
| 1425394_at   | BC023105      | cDNA sequence BC023105                                                                         | BC023105  | 3.8557  | 5.6110  | -1.7553 |
| 1456554_at   |               |                                                                                                | AV370403  | 4.1035  | 5.8632  | -1.7597 |
| 1440153_at   |               |                                                                                                | AI854555  | 4.6127  | 6.3729  | -1.7601 |
| 1419686_at   | Tsga14        | testis specific gene A14                                                                       | NM_031998 | 5.0107  | 6.7709  | -1.7602 |
| 1426397_at   | Tgfr2         | transforming growth factor, beta receptor II                                                   | BG793483  | 8.7794  | 10.5397 | -1.7603 |
| 1446318_at   |               |                                                                                                | BB273207  | 3.9701  | 5.7312  | -1.7611 |
| 1423966_at   | Cd99l2        | CD99 antigen-like 2                                                                            | BB038546  | 6.6406  | 8.4021  | -1.7615 |
| 1418686_at   | Oas1c         | 2'-5' oligoadenylate synthetase 1C                                                             | NM_033541 | 5.7528  | 7.5147  | -1.7619 |
| 1423563_at   | Prrt1         | proline-rich transmembrane protein 1                                                           | AA739053  | 5.2432  | 7.0061  | -1.7629 |
| 1431821_a_at | Eps8l1        | EPS8-like 1                                                                                    | AK014556  | 4.5566  | 6.3197  | -1.7631 |
| 1433608_at   | Scfd2         | Sec1 family domain containing 2                                                                | BB821363  | 5.5963  | 7.3594  | -1.7631 |
| 1449371_at   | Hars2         | histidyl-tRNA synthetase 2, mitochondrial (putative)                                           | NM_080636 | 5.0544  | 6.8186  | -1.7641 |
| 1451577_at   | Zbtb20        | zinc finger and BTB domain containing 20                                                       | AW491109  | 6.3911  | 8.1559  | -1.7648 |
| 1432533_a_at | Slc35a2       | solute carrier family 35 (UDP-galactose transporter), member A2                                | AK008095  | 6.4688  | 8.2352  | -1.7665 |
| 1436388_a_at | 3830406C13Rik | RIKEN cDNA 3830406C13 gene                                                                     | BB763097  | 7.2802  | 9.0477  | -1.7675 |
| 1435473_at   | Ppp1r26       | protein phosphatase 1, regulatory subunit 26                                                   | AV271807  | 5.1383  | 6.9073  | -1.7690 |
| 1442167_at   | Cyfp2         | cytoplasmic FMR1 interacting protein 2                                                         | BG068238  | 3.8419  | 5.6110  | -1.7691 |
| 1440570_at   |               |                                                                                                | BB309408  | 3.7667  | 5.5364  | -1.7697 |
| 1418955_at   | Zfp93         | zinc finger protein 93                                                                         | NM_009567 | 5.4443  | 7.2147  | -1.7704 |
| 1457781_at   | Kcnq1ot1      | KCNQ1 overlapping transcript 1                                                                 | BG063584  | 5.4443  | 7.2147  | -1.7704 |
| 1422600_at   | Rasgrf1       | RAS protein-specific guanine nucleotide-releasing factor 1                                     | NM_011245 | 3.5339  | 5.3054  | -1.7715 |
| 1428614_at   | Ldhd          | lactate dehydrogenase D                                                                        | AW105779  | 4.9219  | 6.6941  | -1.7722 |
| 1453364_x_at | 9130019O22Rik | RIKEN cDNA 9130019O22 gene                                                                     | AK020267  | 3.9246  | 5.6970  | -1.7724 |
| 1421514_a_at | Scml2         | sex comb on midleg-like 2 (Drosophila)                                                         | NM_133194 | 3.9701  | 5.7427  | -1.7726 |
| 1426246_at   | Pros1         | protein S (alpha)                                                                              | Z25469    | 6.4857  | 8.2584  | -1.7727 |
| 1449265_at   | Casp1         | caspase 1                                                                                      | BC008152  | 6.3598  | 8.1325  | -1.7727 |
| 1455614_at   | Tomm40l       | translocase of outer mitochondrial membrane 40 homolog-like (yeast)                            | AV225789  | 3.6373  | 5.4108  | -1.7735 |
| 1421882_a_at | Elavl2        | ELAV (embryonic lethal, abnormal vision, Drosophila)-like 2 (Hu antigen B)                     | BB105998  | 4.0645  | 5.8382  | -1.7736 |
| 1448181_at   | Klf15         | Kruppel-like factor 15                                                                         | BC013486  | 3.4971  | 5.2709  | -1.7738 |
| 1428579_at   | Fmnl2         | formin-like 2                                                                                  | AK017338  | 8.9548  | 10.7289 | -1.7741 |
| 1438701_at   | Bicd1         | bicaudal D homolog 1 (Drosophila)                                                              | BB130665  | 5.6110  | 7.3855  | -1.7745 |
| 1455186_a_at | 1190003J15Rik | RIKEN cDNA 1190003J15 gene                                                                     | BI556771  | 5.9616  | 7.7384  | -1.7768 |
| 1424209_at   | Rars2         | arginyl-tRNA synthetase 2, mitochondrial                                                       | BC024878  | 8.2362  | 10.0130 | -1.7768 |
| 1441636_at   | Sec14l5       | SEC14-like 5 (S. cerevisiae)                                                                   | BB133117  | 5.2626  | 7.0394  | -1.7768 |
| 1456746_a_at | Cd99l2        | CD99 antigen-like 2                                                                            | BB334959  | 6.7124  | 8.4900  | -1.7776 |
| 1423033_at   | Stt3a         | STT3, subunit of the oligosaccharyltransferase complex, homolog A (S. cerevisiae)              | AA756810  | 6.8564  | 8.6350  | -1.7785 |
| 1449160_at   | Npr1          | natriuretic peptide receptor 1                                                                 | J05504    | 4.4586  | 6.2392  | -1.7806 |
| 1441876_x_at | Zfp93         | zinc finger protein 93                                                                         | BB245574  | 4.4196  | 6.2005  | -1.7809 |
| 1455687_at   | Ick           | intestinal cell kinase                                                                         | BB376918  | 4.2823  | 6.0634  | -1.7811 |
| 1430352_at   | Adamts9       | a disintegrin-like and metalloproteinase (reprolysin type) with thrombospondin type 1 motif, 9 | BG141912  | 5.0107  | 6.7928  | -1.7821 |
| 1424613_at   | Gprc5b        | G protein-coupled receptor, family C, group 5, member B                                        | BC020004  | 7.3506  | 9.1332  | -1.7827 |
| 1449335_at   | Timp3         | tissue inhibitor of metalloproteinase 3                                                        | BI111620  | 8.9227  | 10.7065 | -1.7838 |
| 1435092_at   | Arl4a         | ADP-ribosylation factor-like 4A                                                                | AV328143  | 3.9024  | 5.6865  | -1.7841 |
| 1418086_at   | Ppp1r14a      | protein phosphatase 1, regulatory (inhibitor) subunit 14A                                      | NM_026731 | 3.6683  | 5.4524  | -1.7841 |
| 1429115_at   | 2010003O02Rik | RIKEN cDNA 2010003O02 gene                                                                     | AK008077  | 6.9835  | 8.7678  | -1.7843 |
| 1417691_at   | Bin3          | bridging integrator 3                                                                          | NM_021328 | 8.9040  | 10.6905 | -1.7865 |
| 1418345_at   |               |                                                                                                | NM_023517 | 5.6868  | 7.4753  | -1.7885 |
| 1432238_at   | Spats1        | spermatogenesis associated, serine-rich 1                                                      | AK005865  | 4.9109  | 6.7000  | -1.7890 |
| 1424701_at   | Pcdh20        | protocadherin 20                                                                               | BB528056  | 3.6732  | 5.4623  | -1.7891 |
| 1418860_a_at | Letmd1        | LETM1 domain containing 1                                                                      | NM_134093 | 5.1319  | 6.9213  | -1.7895 |
| 1422678_at   | Dgat2         | diacylglycerol O-acyltransferase 2                                                             | AK002443  | 6.7532  | 8.5434  | -1.7902 |
| 1426266_s_at | Zbtb8os       | zinc finger and BTB domain containing 8 opposite strand                                        | BB417508  | 8.7722  | 10.5636 | -1.7914 |
| 1452679_at   | Tubb2b        | tubulin, beta 2B class IIB                                                                     | AA986082  | 10.0360 | 11.8277 | -1.7917 |
| 1418825_at   | Irgm1         | immunity-related GTPase family M member 1                                                      | NM_008326 | 9.4949  | 11.2867 | -1.7917 |
| 1434265_s_at | Ank2          | ankyrin 2, brain                                                                               | BQ174638  | 6.4742  | 8.2685  | -1.7943 |



|              |               |                                                                                       |           |        |         |         |
|--------------|---------------|---------------------------------------------------------------------------------------|-----------|--------|---------|---------|
| 1448707_at   | Taf13         | TAF13 RNA polymerase II, TATA box binding protein (TBP)-associated factor             | NM_025444 | 8.9760 | 10.7706 | -1.7946 |
| 1452796_at   | Def6          | differentially expressed in FDCP 6                                                    | AK010356  | 4.8708 | 6.6656  | -1.7948 |
| 1456860_at   | Cdc26         | cell division cycle 26                                                                | BB761356  | 4.2431 | 6.0385  | -1.7954 |
| 1418386_at   | N6amt2        | N-6 adenine-specific DNA methyltransferase 2 (putative)                               | NM_026526 | 8.3516 | 10.1479 | -1.7963 |
| 1416983_s_at | Foxo1         | forkhead box O1                                                                       | AI462296  | 7.1066 | 8.9030  | -1.7964 |
| 1455418_at   |               |                                                                                       | BM119433  | 6.9850 | 8.7820  | -1.7970 |
| 1431255_at   | Calr3         | calreticulin 3                                                                        | AI324734  | 5.7658 | 7.5638  | -1.7980 |
| 1427178_at   | Tmc4          | transmembrane channel-like gene family 4                                              | BB667469  | 5.8315 | 7.6303  | -1.7988 |
| 1451409_at   | 2210021J22Rik | RIKEN cDNA 2210021J22 gene                                                            | BC025858  | 6.5697 | 8.3716  | -1.8019 |
| 1444723_at   | 6530418L21Rik | RIKEN cDNA 6530418L21 gene                                                            | BB049759  | 4.5708 | 6.3729  | -1.8021 |
| 1435468_at   | B3gnt9-ps     | UDP-GlcNAc:betaGal beta-1,3-N-acetylglucosaminyltransferase 9, pseudogene             | BB547181  | 4.2966 | 6.0989  | -1.8022 |
| 1453255_at   | Slc43a1       | solute carrier family 43, member 1                                                    | AK011417  | 5.4108 | 7.2147  | -1.8039 |
| 1454666_at   | Klf3          | Kruppel-like factor 3 (basic)                                                         | AV230488  | 8.6313 | 10.4362 | -1.8049 |
| 1454084_a_at | Senp8         | SUMO/sentrin specific peptidase 8                                                     | AK018606  | 5.9415 | 7.7496  | -1.8081 |
| 1456596_at   | Fam70a        | family with sequence similarity 70, member A                                          | BB093996  | 4.4496 | 6.2582  | -1.8086 |
| 1435208_at   | Dtx3l         | deltex 3-like (Drosophila)                                                            | AV327407  | 7.8022 | 9.6126  | -1.8104 |
| 1417441_at   | Dnajc12       | DnaJ (Hsp40) homolog, subfamily C, member 12                                          | NM_013888 | 6.6525 | 8.4630  | -1.8105 |
| 1440312_at   | Elovl7        | ELOVL family member 7, elongation of long chain fatty acids (yeast)                   | BQ174957  | 5.3765 | 7.1873  | -1.8107 |
| 1452432_at   | Tfpi          | tissue factor pathway inhibitor                                                       | BF451808  | 5.5198 | 7.3328  | -1.8130 |
| 1451605_at   | Dyx1c1        | dyslexia susceptibility 1 candidate 1 homolog (human)                                 | BC026462  | 3.5839 | 5.3984  | -1.8145 |
| 1440745_at   | Prdm16        | PR domain containing 16                                                               | BB796293  | 4.7423 | 6.5578  | -1.8155 |
| 1436302_at   | Slc10a7       | solute carrier family 10 (sodium/bile acid cotransporter family), member 7            | BB770006  | 6.9880 | 8.8037  | -1.8157 |
| 1454067_a_at | 4931406C07Rik | RIKEN cDNA 4931406C07 gene                                                            | AK016432  | 7.1176 | 8.9340  | -1.8163 |
| 1449303_at   | Sesn3         | sestrin 3                                                                             | NM_030261 | 7.4909 | 9.3073  | -1.8164 |
| 1431403_a_at | Mtap7d2       | MAP7 domain containing 2                                                              | AK019929  | 4.1422 | 5.9590  | -1.8168 |
| 1448557_at   | Fam13c        | family with sequence similarity 13, member C                                          | NM_024244 | 4.0043 | 5.8212  | -1.8170 |
| 1444426_at   | Cass4         | Cas scaffolding protein family member 4                                               | BB327547  | 4.6674 | 6.4845  | -1.8170 |
| 1433720_s_at | Chchd10       | coiled-coil-helix-coiled-coil-helix domain containing 10                              | AI647775  | 8.4839 | 10.3014 | -1.8174 |
| 1435043_at   | Plcb1         | phospholipase C, beta 1                                                               | BB794831  | 7.2302 | 9.0477  | -1.8175 |
| 1451048_at   | Metap2        | methionine aminopeptidase 2                                                           | BG086961  | 3.7934 | 5.6110  | -1.8176 |
| 1420127_s_at |               |                                                                                       | C85100    | 6.1339 | 7.9515  | -1.8176 |
| 1440383_at   | Dclre1b       | DNA cross-link repair 1B, PSO2 homolog (S. cerevisiae)                                | BB763339  | 5.3765 | 7.1984  | -1.8219 |
| 1428568_at   | B230217C12Rik | RIKEN cDNA B230217C12 gene                                                            | BB376573  | 5.7781 | 7.6002  | -1.8222 |
| 1443219_at   |               |                                                                                       | BM232535  | 4.4791 | 6.3015  | -1.8224 |
| 1449013_at   | Eef2k         | eukaryotic elongation factor-2 kinase                                                 | BC003433  | 6.5268 | 8.3497  | -1.8228 |
| 1435745_at   | 5031439G07Rik | RIKEN cDNA 5031439G07 gene                                                            | BI408317  | 8.3445 | 10.1689 | -1.8244 |
| 1438037_at   | Herc6         | hect domain and RLD 6                                                                 | AW208668  | 8.1365 | 9.9618  | -1.8252 |
| 1438452_at   | Nebi          | nebulin                                                                               | BM121794  | 4.7712 | 6.5981  | -1.8269 |
| 1457316_at   | Mtap6         | microtubule-associated protein 6                                                      | BM233608  | 5.7781 | 7.6064  | -1.8283 |
| 1455915_at   | Galnt4        | UDP-N-acetyl-alpha-D-galactosamine:polypeptide N-acetylgalactosaminyltransferase 4    | BF583094  | 5.9590 | 7.7878  | -1.8287 |
| 1439044_at   | Zfp354c       | zinc finger protein 354C                                                              | BB024472  | 6.5058 | 8.3355  | -1.8298 |
| 1451132_at   | Pbxip1        | pre B cell leukemia transcription factor interacting protein 1                        | AV220340  | 7.3026 | 9.1332  | -1.8306 |
| 1428429_at   | Rgmb          | RGM domain family, member B                                                           | AK004310  | 8.0704 | 9.9017  | -1.8312 |
| 1417211_a_at | 1110032A03Rik | RIKEN cDNA 1110032A03 gene                                                            | NM_023483 | 6.1198 | 7.9515  | -1.8317 |
| 1439738_at   | Mettl13       | methyltransferase like 13                                                             | BB756081  | 4.6127 | 6.4457  | -1.8329 |
| 1451400_at   | Gemin8        | gem (nuclear organelle) associated protein 8                                          | BC023488  | 7.9268 | 9.7608  | -1.8340 |
| 1453194_at   | 4930432K21Rik | RIKEN cDNA 4930432K21 gene                                                            | AK015293  | 4.1684 | 6.0047  | -1.8362 |
| 1416390_at   | Rcgbt2        | regulator of chromosome condensation (RCC1) and BTB (POZ) domain containing protein 2 | NM_134083 | 5.3043 | 7.1415  | -1.8372 |
| 1444726_at   | Krr1          | KRR1, small subunit (SSU) processome component, homolog (yeast)                       | AV355312  | 5.0395 | 6.8770  | -1.8375 |
| 1420674_at   | Pla2g2e       | phospholipase A2, group IIE                                                           | NM_012044 | 4.2966 | 6.1404  | -1.8438 |

|              |               |                                                                                                      |           |        |         |         |
|--------------|---------------|------------------------------------------------------------------------------------------------------|-----------|--------|---------|---------|
| 1450546_at   | Ammecr1       | Alport syndrome, mental retardation, midface hypoplasia and elliptocytosis chromosomal region gene 1 | NM_019496 | 4.2966 | 6.1404  | -1.8438 |
| 1447849_s_at | Maf           | avian musculoaponeurotic fibrosarcoma (v-maf) AS42 oncogene homolog                                  | AV323441  | 4.2333 | 6.0777  | -1.8444 |
| 1424718_at   | Mapt          | microtubule-associated protein tau                                                                   | M18775    | 5.2306 | 7.0757  | -1.8451 |
| 1436426_at   | Cc2d2a        | coiled-coil and C2 domain containing 2A                                                              | BF464165  | 6.4242 | 8.2714  | -1.8472 |
| 1435758_at   | B4galt6       | UDP-Gal:betaGlcNAc beta 1,4-galactosyltransferase, polypeptide 6                                     | BI685536  | 7.4502 | 9.2978  | -1.8477 |
| 1453377_at   | Sh2d4a        | SH2 domain containing 4A                                                                             | AK008803  | 4.1900 | 6.0377  | -1.8477 |
| 1434335_at   | Dip2b         | DIP2 disco-interacting protein 2 homolog B (Drosophila)                                              | BB795504  | 9.0395 | 10.8879 | -1.8483 |
| 1457774_at   | Ntpcr         | nucleoside-triphosphatase, cancer-related                                                            | BB528542  | 4.8714 | 6.7217  | -1.8503 |
| 1437089_at   | Pyroxd2       | pyridine nucleotide-disulphide oxidoreductase domain 2                                               | AV223337  | 4.5566 | 6.4073  | -1.8507 |
| 1437375_at   | Rfx3          | regulatory factor X, 3 (influences HLA class II expression)                                          | BB745175  | 6.1890 | 8.0411  | -1.8521 |
| 1434576_at   | Tsga14        | testis specific gene A14                                                                             | BI648973  | 5.5571 | 7.4095  | -1.8524 |
| 1436584_at   | Spry2         | sprouty homolog 2 (Drosophila)                                                                       | BB529691  | 8.4882 | 10.3408 | -1.8526 |
| 1441937_s_at | Pink1         | PTEN induced putative kinase 1                                                                       | AV371921  | 7.6525 | 9.5056  | -1.8530 |
| 1423169_at   | Taf7          | TAF7 RNA polymerase II, TATA box binding protein (TBP)-associated factor                             | AV213552  | 5.0457 | 6.9008  | -1.8551 |
| 1416635_at   | Smpdl3a       | sphingomyelin phosphodiesterase, acid-like 3A                                                        | NM_020561 | 3.3762 | 5.2316  | -1.8554 |
| 1427081_at   | A630072M18Rik | RIKEN cDNA A630072M18 gene                                                                           | BB246700  | 4.4167 | 6.2723  | -1.8556 |
| 1451564_at   | Parp14        | poly (ADP-ribose) polymerase family, member 14                                                       | BC021340  | 7.6023 | 9.4585  | -1.8562 |
| 1460344_at   | Pbxip1        | pre B cell leukemia transcription factor interacting protein 1                                       | AV220340  | 6.8998 | 8.7562  | -1.8563 |
| 1458934_at   | D5Ert505e     | DNA segment, Chr 5, ERATO Doi 505, expressed                                                         | BG068094  | 4.1053 | 5.9620  | -1.8568 |
| 1444648_at   | Fam178b       | family with sequence similarity 178, member B                                                        | AI507589  | 4.8229 | 6.6801  | -1.8572 |
| 1419602_at   | Hoxa2         | homeobox A2                                                                                          | NM_010451 | 3.7829 | 5.6402  | -1.8573 |
| 1435933_at   | Scn2a1        | sodium channel, voltage-gated, type II, alpha 1                                                      | BE946786  | 3.1525 | 5.0107  | -1.8582 |
| 1438483_at   | Nos1          | nitric oxide synthase 1, neuronal                                                                    | BB794641  | 5.4443 | 7.3026  | -1.8583 |
| 1422785_at   | Rasa2         | RAS p21 protein activator 2                                                                          | NM_053268 | 8.4941 | 10.3530 | -1.8589 |
| 1428550_at   | YdjC          | YdjC homolog (bacterial)                                                                             | AK007503  | 6.1807 | 8.0419  | -1.8611 |
| 1421412_at   | Gsc           | gooseoid homeobox                                                                                    | NM_010351 | 3.3669 | 5.2306  | -1.8637 |
| 1459664_at   | Wdr31         | WD repeat domain 31                                                                                  | BB741856  | 4.8303 | 6.6941  | -1.8637 |
| 1434275_at   | Nkd2          | naked cuticle 2 homolog (Drosophila)                                                                 | BB767757  | 4.7088 | 6.5730  | -1.8642 |
| 1441547_at   |               |                                                                                                      | BB453909  | 3.6342 | 5.4985  | -1.8643 |
| 1430324_x_at |               |                                                                                                      | AK006737  | 4.4176 | 6.2831  | -1.8655 |
| 1433722_at   | Akap13        | A kinase (PRKA) anchor protein 13                                                                    | AV304590  | 8.1009 | 9.9671  | -1.8662 |
| 1438426_at   | Shisa4        | shisa homolog 4 (Xenopus laevis)                                                                     | BF468228  | 8.0879 | 9.9551  | -1.8672 |
| 1423542_at   | Klk7          | kallikrein related-peptidase 7 (chymotryptic, stratum corneum)                                       | BB283507  | 4.5566 | 6.4242  | -1.8676 |
| 1417359_at   | Mfap2         | microfibrillar-associated protein 2                                                                  | NM_008546 | 7.1594 | 9.0276  | -1.8682 |
| 1421594_a_at | Sytl2         | synaptotagmin-like 2                                                                                 | NM_031394 | 4.6674 | 6.5370  | -1.8695 |
| 1452148_at   | Lrpap1        | low density lipoprotein receptor-related protein associated protein 1                                | D00622    | 5.8649 | 7.7357  | -1.8708 |
| 1449129_a_at | Kcnp3         | Kv channel interacting protein 3, calsenilin                                                         | AF300870  | 4.5691 | 6.4409  | -1.8718 |
| 1449122_at   | Ubx2b         | UBX domain protein 2B                                                                                | NM_026534 | 4.9957 | 6.8688  | -1.8731 |
| 1448996_at   | Rom1          | rod outer segment membrane protein 1                                                                 | NM_009073 | 5.3325 | 7.2059  | -1.8734 |
| 1424146_at   | Gpr3711       | G protein-coupled receptor 37-like 1                                                                 | AB016602  | 5.2309 | 7.1054  | -1.8745 |
| 1423679_at   | Tmem246       | transmembrane protein 246                                                                            | BC013800  | 3.7934 | 5.6689  | -1.8755 |
| 1436531_at   | Metap2        | methionine aminopeptidase 2                                                                          | BB447764  | 7.5356 | 9.4113  | -1.8757 |
| 1418895_at   | Skap2         | src family associated phosphoprotein 2                                                               | NM_018773 | 8.9431 | 10.8193 | -1.8762 |
| 1457088_at   | Bloc1s6       | biogenesis of organelles complex-1, subunit 6, pallidin                                              | BB780781  | 3.9279 | 5.8041  | -1.8762 |
| 1416227_at   | Arcp1b        | actin related protein 2/3 complex, subunit 1B                                                        | BE979985  | 6.9596 | 8.8367  | -1.8771 |
| 1424041_s_at | C1s           | complement component 1, s subcomponent                                                               | BC022123  | 6.6135 | 8.4963  | -1.8829 |
| 1460359_at   | Armxc3        | armadillo repeat containing, X-linked 3                                                              | AK004598  | 7.6381 | 9.5212  | -1.8831 |
| 1455181_at   | Rasa2         | RAS p21 protein activator 2                                                                          | BM228516  | 8.3560 | 10.2393 | -1.8833 |
| 1416607_at   | 4931406C07Rik | RIKEN cDNA 4931406C07 gene                                                                           | AI461712  | 8.1272 | 10.0106 | -1.8834 |
| 1439531_at   | E130311K13Rik | RIKEN cDNA E130311K13 gene                                                                           | BB754259  | 6.4246 | 8.3108  | -1.8862 |
| 1436346_at   | Cd109         | CD109 antigen                                                                                        | AV246882  | 7.9834 | 9.8707  | -1.8873 |
| 1450974_at   | Timp4         | tissue inhibitor of metalloproteinase 4                                                              | BI788452  | 5.6400 | 7.5278  | -1.8878 |

|              |               |                                                                                   |           |        |         |         |
|--------------|---------------|-----------------------------------------------------------------------------------|-----------|--------|---------|---------|
| 1427302_at   | Enpp3         | ectonucleotide pyrophosphatase/phosphodiesterase 3                                | AV224446  | 4.6127 | 6.5005  | -1.8878 |
| 1424857_a_at | Trim34a       | tripartite motif-containing 34A                                                   | AF220142  | 7.4055 | 9.2936  | -1.8881 |
| 1415772_at   | Ncl           | nucleolin                                                                         | BF118393  | 7.2973 | 9.1870  | -1.8897 |
| 1442916_at   |               |                                                                                   | BB202300  | 3.8342 | 5.7245  | -1.8903 |
| 1447623_s_at | Prkd1         | protein kinase D1                                                                 | AV297026  | 5.6784 | 7.5689  | -1.8905 |
| 1450417_a_at | Rps20         | ribosomal protein S20                                                             | BG070206  | 5.3047 | 7.1953  | -1.8906 |
| 1434216_a_at | Nudt19        | nudix (nucleoside diphosphate linked moiety X)-type motif 19                      | BG070689  | 7.5325 | 9.4232  | -1.8907 |
| 1426448_at   | Pja1          | praja1, RING-H2 motif containing                                                  | BM199789  | 6.5991 | 8.4900  | -1.8910 |
| 1449514_at   | Grk5          | G protein-coupled receptor kinase 5                                               | BC019379  | 4.9657 | 6.8571  | -1.8913 |
| 1434550_at   | 3830406C13Rik | RIKEN cDNA 3830406C13 gene                                                        | AW146284  | 4.7960 | 6.6891  | -1.8931 |
| 1415907_at   | Ccnd3         | cyclin D3                                                                         | NM_007632 | 9.0626 | 10.9570 | -1.8944 |
| 1453757_at   | Herc6         | hect domain and RLD 6                                                             | AI639807  | 5.3414 | 7.2368  | -1.8954 |
| 1434456_at   | Rundc3b       | RUN domain containing 3B                                                          | BG075955  | 4.4924 | 6.3902  | -1.8978 |
| 1448681_at   | Il15ra        | interleukin 15 receptor, alpha chain                                              | NM_133836 | 4.7084 | 6.6062  | -1.8978 |
| 1426530_a_at | Klh5          | kelch-like 5 (Drosophila)                                                         | BM120233  | 8.6793 | 10.5773 | -1.8980 |
| 1453820_at   | BC065403      | cDNA sequence BC065403                                                            | AK020810  | 3.3573 | 5.2554  | -1.8981 |
| 1441899_x_at | Bcan          | brevican                                                                          | BB335613  | 6.7581 | 8.6588  | -1.9007 |
| 1457033_at   | Zscan4a       | zinc finger and SCAN domain containing 4A                                         | BM198753  | 5.1771 | 7.0790  | -1.9019 |
| 1433542_at   | Inpp5f        | inositol polyphosphate-5-phosphatase F                                            | BB085335  | 8.0108 | 9.9132  | -1.9024 |
| 1429887_at   | Nos1          | nitric oxide synthase 1, neuronal                                                 | AK009163  | 6.8275 | 8.7307  | -1.9032 |
| 1427198_at   | BC022960      | cDNA sequence BC022960                                                            | BC022960  | 6.6106 | 8.5139  | -1.9033 |
| 1448747_at   | Fbxo32        | F-box protein 32                                                                  | AF441120  | 6.6418 | 8.5477  | -1.9059 |
| 1434264_at   | Ank2          | ankyrin 2, brain                                                                  | BQ174638  | 6.1198 | 8.0272  | -1.9074 |
| 1437829_s_at | Eef2k         | eukaryotic elongation factor-2 kinase                                             | C86191    | 8.1177 | 10.0253 | -1.9076 |
| 1452695_at   | Erp27         | endoplasmic reticulum protein 27                                                  | AK007684  | 4.1402 | 6.0489  | -1.9087 |
| 1449037_at   | Crem          | cAMP responsive element modulator                                                 | AI467599  | 5.0120 | 6.9213  | -1.9093 |
| 1417218_at   | Calhm2        | calcium homeostasis modulator 2                                                   | NM_133746 | 4.8610 | 6.7709  | -1.9099 |
| 1455058_at   | Mttnr9        | myotubularin related protein 9                                                    | BM118290  | 6.2242 | 8.1348  | -1.9106 |
| 1450931_at   | Dock9         | dedicator of cytokinesis 9                                                        | BB795072  | 7.1343 | 9.0459  | -1.9116 |
| 1434140_at   | Mcf2l         | mcf.2 transforming sequence-like                                                  | AV293368  | 4.9195 | 6.8313  | -1.9118 |
| 1455339_at   | Fkbp15        | FK506 binding protein 15                                                          | BG094421  | 7.3681 | 9.2805  | -1.9123 |
| 1437857_at   | Dpy19l3       | dpy-19-like 3 (C. elegans)                                                        | AV367203  | 5.5944 | 7.5068  | -1.9124 |
| 1439128_at   | Zbtb20        | zinc finger and BTB domain containing 20                                          | AI595815  | 6.6791 | 8.5914  | -1.9124 |
| 1446990_at   | Nfia          | nuclear factor I/A                                                                | AW556192  | 5.0321 | 6.9450  | -1.9128 |
| 1433583_at   | Zfp365        | zinc finger protein 365                                                           | AV327248  | 7.1190 | 9.0331  | -1.9141 |
| 1455199_at   | AI429214      | expressed sequence AI429214                                                       | BB667176  | 5.2803 | 7.1952  | -1.9149 |
| 1427955_a_at | Deb1          | differentially expressed in B16F10 1                                              | AK003863  | 9.1233 | 11.0385 | -1.9152 |
| 1452700_s_at | Kbtbd7        | kelch repeat and BTB (POZ) domain containing 7                                    | AK003597  | 6.9213 | 8.8367  | -1.9154 |
| 1450813_a_at | Tnni1         | troponin I, skeletal, slow 1                                                      | NM_021467 | 5.2106 | 7.1274  | -1.9168 |
| 1450165_at   | Slnf2         | schlafen 2                                                                        | NM_011408 | 5.8274 | 7.7444  | -1.9171 |
| 1432122_at   | Lrriq3        | leucine-rich repeats and IQ motif containing 3                                    | AK015758  | 3.5892 | 5.5063  | -1.9171 |
| 1428284_at   | 8430427H17Rik | RIKEN cDNA 8430427H17 gene                                                        | AK018446  | 6.4952 | 8.4125  | -1.9173 |
| 1439795_at   | Gpr64         | G protein-coupled receptor 64                                                     | AV242919  | 4.3192 | 6.2392  | -1.9200 |
| 1427434_at   | Naip6         | NLR family, apoptosis inhibitory protein 6                                        | AI451585  | 5.5020 | 7.4224  | -1.9204 |
| 1454808_at   | Efha1         | EF hand domain family A1                                                          | BQ176617  | 8.4601 | 10.3810 | -1.9209 |
| 1423475_at   | Cnm2          | cyclin M2                                                                         | BB278418  | 4.8712 | 6.7928  | -1.9216 |
| 1435229_at   | Gramd1b       | GRAM domain containing 1B                                                         | BI729743  | 4.8229 | 6.7471  | -1.9242 |
| 1443349_at   |               |                                                                                   | BB211894  | 3.6047 | 5.5301  | -1.9254 |
| 1428916_s_at | Sirt5         | sirtuin 5 (silent mating type information regulation 2 homolog) 5 (S. cerevisiae) | AK002609  | 6.6780 | 8.6043  | -1.9264 |
| 1421155_at   | B3galt6       | UDP-Gal:betaGal beta 1,3-galactosyltransferase, polypeptide 6                     | NM_080445 | 5.5812 | 7.5095  | -1.9283 |
| 1444342_at   | Nup155        | nucleoporin 155                                                                   | BB162912  | 6.0989 | 8.0272  | -1.9283 |
| 1436570_at   | Pag1          | phosphoprotein associated with glycosphingolipid microdomains 1                   | BG143461  | 6.2501 | 8.1793  | -1.9292 |
| 1449072_a_at | N6amt2        | N-6 adenine-specific DNA methyltransferase 2 (putative)                           | NM_026526 | 8.2615 | 10.1909 | -1.9294 |
| 1433517_at   | Myeov2        | myeloma overexpressed 2                                                           | BE945188  | 5.3494 | 7.2792  | -1.9298 |
| 1415894_at   | Enpp2         | ectonucleotide pyrophosphatase/phosphodiesterase 2                                | BC003264  | 5.5008 | 7.4308  | -1.9300 |
| 1459903_at   | Sema7a        | sema domain, immunoglobulin domain (Ig), and GPI membrane anchor, (semaphorin) 7A | AA144045  | 6.0042 | 7.9359  | -1.9317 |
| 1433992_at   | Shroom2       | shroom family member 2                                                            | BQ176992  | 7.2165 | 9.1503  | -1.9338 |

|              |               |                                                                                                            |           |        |         |         |
|--------------|---------------|------------------------------------------------------------------------------------------------------------|-----------|--------|---------|---------|
| 1452386_at   | Sall3         | sal-like 3 (Drosophila)                                                                                    | X97581    | 5.5663 | 7.5015  | -1.9352 |
| 1456563_at   | Arhgef37      | Rho guanine nucleotide exchange factor (GEF)<br>37                                                         | BB769119  | 3.9024 | 5.8382  | -1.9357 |
| 1438662_at   | Ajap1         | adherens junction associated protein 1                                                                     | AW123234  | 4.1715 | 6.1090  | -1.9375 |
| 1418873_at   | Sfxn4         | sideroflexin 4                                                                                             | NM_053198 | 5.6966 | 7.6377  | -1.9412 |
| 1423902_s_at | Arhgef12      | Rho guanine nucleotide exchange factor (GEF)<br>12                                                         | AF467766  | 8.8720 | 10.8137 | -1.9416 |
| 1433902_at   | Kbtbd8        | kelch repeat and BTB (POZ) domain containing<br>8                                                          | BB469300  | 3.9701 | 5.9119  | -1.9418 |
| 1443858_at   | Trim12c       | tripartite motif-containing 12C                                                                            | BI653857  | 7.5356 | 9.4775  | -1.9419 |
| 1421844_at   | Il1rap        | interleukin 1 receptor accessory protein                                                                   | BE285634  | 7.4472 | 9.3899  | -1.9427 |
| 1430697_at   | Ammecr1       | Alport syndrome, mental retardation, midface<br>hypoplasia and elliptocytosis chromosomal<br>region gene 1 | BM235514  | 8.0850 | 10.0277 | -1.9427 |
| 1452626_a_at | Fuom          | fucose mutarotase                                                                                          | AK007494  | 7.4140 | 9.3592  | -1.9452 |
| 1439278_at   | Zbtb20        | zinc finger and BTB domain containing 20                                                                   | BB175650  | 5.7781 | 7.7248  | -1.9467 |
| 1429269_at   | BC068157      | cDNA sequence BC068157                                                                                     | BE992549  | 5.3765 | 7.3238  | -1.9473 |
| 1432558_a_at | Mal           | myelin and lymphocyte protein, T cell<br>differentiation protein                                           | AK019046  | 5.7515 | 7.7010  | -1.9495 |
| 1436199_at   | Trim14        | tripartite motif-containing 14                                                                             | AU042532  | 6.5505 | 8.5003  | -1.9498 |
| 1453913_a_at | Tap2          | transporter 2, ATP-binding cassette, sub-family<br>B (MDR/TAP)                                             | BE691515  | 7.2537 | 9.2038  | -1.9501 |
| 1452670_at   | Myl9          | myosin, light polypeptide 9, regulatory                                                                    | AK007972  | 3.6865 | 5.6371  | -1.9506 |
| 1426973_at   | Gpr153        | G protein-coupled receptor 153                                                                             | AK004377  | 6.0989 | 8.0510  | -1.9521 |
| 1416956_at   | Kcnab2        | potassium voltage-gated channel, shaker-<br>related subfamily, beta member 2                               | U31908    | 5.2685 | 7.2212  | -1.9527 |
| 1419971_s_at | Slc35a5       | solute carrier family 35, member A5                                                                        | C86506    | 8.1009 | 10.0540 | -1.9531 |
| 1435335_a_at | Gnptab        | N-acetylglucosamine-1-phosphate transferase,<br>alpha and beta subunits                                    | BG144467  | 7.8900 | 9.8437  | -1.9537 |
| 1421855_at   | Fgl2          | fibrinogen-like protein 2                                                                                  | BF136544  | 3.5423 | 5.4985  | -1.9562 |
| 1435540_at   | Irgq          | immunity-related GTPase family, Q                                                                          | BM116550  | 6.7448 | 8.7021  | -1.9573 |
| 1422748_at   | Zeb2          | zinc finger E-box binding homeobox 2                                                                       | NM_015753 | 8.9519 | 10.9093 | -1.9574 |
| 1437873_at   | Zfp799        | zinc finger protein 799                                                                                    | BB044772  | 5.5375 | 7.4967  | -1.9592 |
| 1449098_a_at | Poli          | polymerase (DNA directed), iota                                                                            | NM_011972 | 6.0270 | 7.9862  | -1.9592 |
| 1415897_a_at | Mgst1         | microsomal glutathione S-transferase 1                                                                     | BI150149  | 9.1082 | 11.0681 | -1.9599 |
| 1454997_at   | Msrb3         | methionine sulfoxide reductase B3                                                                          | AV286522  | 5.8041 | 7.7647  | -1.9605 |
| 1457766_at   | Wfdc6a        | WAP four-disulfide core domain 6A                                                                          | AV378987  | 4.4791 | 6.4400  | -1.9609 |
| 1444177_at   | E330020D12Rik | Riken cDNA E330020D12 gene                                                                                 | AI451538  | 4.4793 | 6.4409  | -1.9615 |
| 1456331_at   | 9130023H24Rik | RIKEN cDNA 9130023H24 gene                                                                                 | BB040432  | 4.6360 | 6.5981  | -1.9620 |
| 1423854_a_at | Ras11b        | RAS-like, family 11, member B                                                                              | BC008101  | 6.5424 | 8.5057  | -1.9633 |
| 1417951_at   | Eno3          | enolase 3, beta muscle                                                                                     | NM_007933 | 7.8696 | 9.8332  | -1.9636 |
| 1423395_at   | Tsnax         | translin-associated factor X                                                                               | BM021706  | 8.0444 | 10.0083 | -1.9639 |
| 1418260_at   | Hunk          | hormonally upregulated Neu-associated kinase                                                               | NM_015755 | 5.5048 | 7.4693  | -1.9645 |
| 1426572_at   | Me2           | malic enzyme 2, NAD(+)-dependent,<br>mitochondrial                                                         | BM235734  | 8.4032 | 10.3678 | -1.9646 |
| 1437065_at   | Zbtb20        | zinc finger and BTB domain containing 20                                                                   | BQ174376  | 6.1264 | 8.0910  | -1.9647 |
| 1420859_at   | Pkia          | protein kinase inhibitor, alpha                                                                            | AK010212  | 3.8127 | 5.7781  | -1.9654 |
| 1422907_at   | Gnat2         | guanine nucleotide binding protein, alpha<br>transducing 2                                                 | NM_008141 | 4.6468 | 6.6129  | -1.9661 |
| 1455419_at   | D630045J12Rik | RIKEN cDNA D630045J12 gene                                                                                 | BB503889  | 7.6211 | 9.5881  | -1.9669 |
| 1423753_at   | Bambi         | BMP and activin membrane-bound inhibitor,<br>homolog ( <i>Xenopus laevis</i> )                             | AF153440  | 4.7270 | 6.6941  | -1.9671 |
| 1456552_at   | Foxl2os       | forkhead box L2 opposite strand transcript                                                                 | BB021606  | 3.6732 | 5.6402  | -1.9671 |
| 1417924_at   | Pak3          | p21 protein (Cdc42/Rac)-activated kinase 3                                                                 | BQ174935  | 4.4902 | 6.4574  | -1.9672 |
| 1440478_at   | Nus1          | nuclear undecaprenyl pyrophosphate synthase<br>1 homolog ( <i>S. cerevisiae</i> )                          | BM941145  | 4.2333 | 6.2005  | -1.9672 |
| 1445468_at   | Gm10451       | predicted gene 10451                                                                                       | BB812219  | 4.7130 | 6.6802  | -1.9672 |
| 1449307_at   | Dbndd1        | dysbindin (dystrobrevin binding protein 1)<br>domain containing 1                                          | NM_028146 | 6.3015 | 8.2688  | -1.9673 |
| 1434015_at   | Slc2a6        | solute carrier family 2 (facilitated glucose<br>transporter), member 6                                     | BB196807  | 5.0174 | 6.9873  | -1.9699 |
| 1456218_at   | Snx22         | sorting nexin 22                                                                                           | AV333851  | 5.4836 | 7.4557  | -1.9720 |
| 1453414_at   | Ypel2         | yippee-like 2 ( <i>Drosophila</i> )                                                                        | BB133023  | 3.0872 | 5.0594  | -1.9722 |
| 1437785_at   | Adamts9       | a disintegrin-like and metallopeptidase<br>(reprolysin type) with thrombospondin type 1<br>motif, 9        | AV364944  | 7.2094 | 9.1846  | -1.9751 |

|              |               |                                                                                         |           |        |         |         |
|--------------|---------------|-----------------------------------------------------------------------------------------|-----------|--------|---------|---------|
| 1420640_at   | Jmy           | junction-mediating and regulatory protein                                               | BF227962  | 6.0343 | 8.0095  | -1.9752 |
| 1437403_at   | Samd5         | sterile alpha motif domain containing 5                                                 | BB308071  | 5.3588 | 7.3354  | -1.9766 |
| 1451040_at   | Dtd1          | D-tyrosyl-tRNA deacylase 1 homolog (S. cerevisiae)                                      | AI451865  | 8.0329 | 10.0098 | -1.9769 |
| 1417961_a_at | Trim30a       | tripartite motif-containing 30A                                                         | BM240719  | 8.6542 | 10.6320 | -1.9778 |
| 1437548_at   | Bicd1         | bicaudal D homolog 1 (Drosophila)                                                       | AV367839  | 4.3772 | 6.3554  | -1.9782 |
| 1423363_at   | Sort1         | sortilin 1                                                                              | AV247637  | 5.0201 | 6.9986  | -1.9785 |
| 1422150_at   | Hmx3          | H6 homeobox 3                                                                           | NM_008257 | 4.8009 | 6.7797  | -1.9789 |
| 1424716_at   | Retsat        | retinol saturase (all trans retinol 13,14 reductase)                                    | BB775176  | 5.5673 | 7.5478  | -1.9805 |
| 1424105_a_at | Pttg1         | pituitary tumor-transforming gene 1                                                     | AF069051  | 9.1593 | 11.1404 | -1.9811 |
| 1439825_at   | Dtx3l         | deltex 3-like (Drosophila)                                                              | BB705351  | 8.0727 | 10.0551 | -1.9824 |
| 1437556_at   | Zfx4          | zinc finger homeodomain 4                                                               | BF147593  | 3.8014 | 5.7856  | -1.9842 |
| 1438443_at   | Zbtb20        | zinc finger and BTB domain containing 20                                                | BB751546  | 7.4502 | 9.4349  | -1.9848 |
| 1415850_at   | Rasa3         | RAS p21 protein activator 3                                                             | NM_009025 | 9.2861 | 11.2718 | -1.9857 |
| 1419057_at   | Slc5a1        | solute carrier family 5 (sodium/glucose cotransporter), member 1                        | AF208031  | 3.9024 | 5.8889  | -1.9865 |
| 1437959_at   | Zfp324        | zinc finger protein 324                                                                 | BB277175  | 5.0818 | 7.0683  | -1.9866 |
| 1427410_at   | Dleu2         | deleted in lymphocytic leukemia, 2                                                      | BB812902  | 4.2333 | 6.2200  | -1.9867 |
| 1430989_a_at | 1700020I14Rik | RIKEN cDNA 1700020I14 gene                                                              | AK006166  | 6.5679 | 8.5549  | -1.9869 |
| 1460686_at   | Cntd1         | cyclin N-terminal domain containing 1                                                   | BC006866  | 5.2593 | 7.2467  | -1.9874 |
| 1449408_at   | Jam2          | junction adhesion molecule 2                                                            | NM_023844 | 5.5812 | 7.5689  | -1.9877 |
| 1444060_at   | 2610027K06Rik | RIKEN cDNA 2610027K06 gene                                                              | BB497990  | 4.2131 | 6.2020  | -1.9889 |
| 1436877_at   | Lrch2         | leucine-rich repeats and calponin homology (CH) domain containing 2                     | AV231827  | 4.4518 | 6.4409  | -1.9890 |
| 1440928_at   | D630037F22Rik | RIKEN cDNA D630037F22 gene                                                              | AV252126  | 6.6421 | 8.6313  | -1.9893 |
| 1453651_a_at | Mpc1          | mitochondrial pyruvate carrier 1                                                        | AV223468  | 8.8690 | 10.8586 | -1.9897 |
| 1433645_at   |               |                                                                                         | BM207133  | 9.9675 | 11.9576 | -1.9901 |
| 1426375_s_at | Oxnad1        | oxidoreductase NAD-binding domain containing 1                                          | AV094699  | 8.0292 | 10.0203 | -1.9911 |
| 1436933_at   |               |                                                                                         | BM211430  | 4.6502 | 6.6421  | -1.9918 |
| 1458702_at   | 2610316D01Rik | RIKEN cDNA 2610316D01 gene                                                              | AV170309  | 4.4791 | 6.4737  | -1.9946 |
| 1425779_a_at | Tbx1          | T-box 1                                                                                 | AF326960  | 4.2633 | 6.2582  | -1.9949 |
| 1426938_at   | Nova1         | neuro-oncological ventral antigen 1                                                     | BB627486  | 4.3588 | 6.3554  | -1.9966 |
| 1419521_at   | Zfp94         | zinc finger protein 94                                                                  | BC005437  | 4.1831 | 6.1807  | -1.9976 |
| 1428935_at   | Canx          | calnexin                                                                                | AI988026  | 7.0981 | 9.0959  | -1.9978 |
| 1429625_at   | 2900054C01Rik | RIKEN cDNA 2900054C01 gene                                                              | BM202541  | 6.2392 | 8.2383  | -1.9991 |
| 1427986_a_at | Col16a1       | collagen, type XVI, alpha 1                                                             | BB766878  | 8.3616 | 10.3629 | -2.0013 |
| 1446851_at   |               |                                                                                         | BB017755  | 5.1687 | 7.1705  | -2.0018 |
| 1440007_at   | D930003E18Rik | RIKEN cDNA D930003E18 gene                                                              | BB378464  | 3.3019 | 5.3054  | -2.0035 |
| 1435911_s_at | Slc2a12       | solute carrier family 2 (facilitated glucose transporter), member 12                    | BB043465  | 3.9284 | 5.9357  | -2.0072 |
| 1427535_s_at | Obsl1         | obscurin-like 1                                                                         | BC025848  | 5.9217 | 7.9300  | -2.0082 |
| 1418578_at   | Dgka          | diacylglycerol kinase, alpha                                                            | BC006713  | 7.3427 | 9.3529  | -2.0101 |
| 1452656_at   | Zdhhc2        | zinc finger, DHHC domain containing 2                                                   | BB224658  | 5.6343 | 7.6454  | -2.0110 |
| 1448489_at   | Pafah2        | platelet-activating factor acetylhydrolase 2                                            | NM_133880 | 6.2200 | 8.2314  | -2.0114 |
| 1433453_a_at | Abtb2         | ankyrin repeat and BTB (POZ) domain containing 2                                        | BB621938  | 8.3257 | 10.3375 | -2.0118 |
| 1436272_at   | Rab3gap2      | RAB3 GTPase activating protein subunit 2                                                | BQ175872  | 5.3880 | 7.3998  | -2.0118 |
| 1419359_at   | Hexim1        | hexamethylene bis-acetamide inducible 1                                                 | BI411874  | 6.5331 | 8.5451  | -2.0121 |
| 1453721_a_at | Slc31a2       | solute carrier family 31, member 2                                                      | AK015878  | 6.7532 | 8.7653  | -2.0121 |
| 1458403_at   | Tnik          | TRAF2 and NCK interacting kinase                                                        | BB222494  | 4.2695 | 6.2831  | -2.0136 |
| 1417627_a_at | Limk1         | LIM-domain containing, protein kinase                                                   | NM_010717 | 7.6605 | 9.6769  | -2.0164 |
| 1439087_a_at | Pik3ip1       | phosphoinositide-3-kinase interacting protein 1                                         | BB030508  | 6.2654 | 8.2828  | -2.0174 |
| 1425037_at   | Fgd4          | FYVE, RhoGEF and PH domain containing 4                                                 | AF402611  | 3.3935 | 5.4118  | -2.0183 |
| 1451750_at   | Irak4         | interleukin-1 receptor-associated kinase 4                                              | BM220651  | 4.9459 | 6.9643  | -2.0184 |
| 1417497_at   | Cp            | ceruloplasmin                                                                           | BB332449  | 5.6412 | 7.6610  | -2.0198 |
| 1421746_a_at | Fbxo17        | F-box protein 17                                                                        | NM_015796 | 4.9673 | 6.9873  | -2.0200 |
| 1429861_at   | Pcdh9         | protocadherin 9                                                                         | BQ177394  | 5.0970 | 7.1176  | -2.0207 |
| 1428332_at   | Pik3ip1       | phosphoinositide-3-kinase interacting protein 1                                         | AW556858  | 6.8869 | 8.9082  | -2.0213 |
| 1429718_at   | Slitrk5       | SLIT and NTRK-like family, member 5                                                     | BB782729  | 3.3196 | 5.3414  | -2.0218 |
| 1434996_at   | Slc25a16      | solute carrier family 25 (mitochondrial carrier, Graves disease autoantigen), member 16 | AV316233  | 6.5424 | 8.5656  | -2.0232 |
| 1429138_at   | Npas3         | neuronal PAS domain protein 3                                                           | BB391772  | 5.5273 | 7.5511  | -2.0238 |
| 1437451_at   | Ecsr          | endothelial cell surface expressed chemotaxis and apoptosis regulator                   | BB736636  | 4.8466 | 6.8733  | -2.0267 |

|              |               |                                                                            |           |        |         |         |
|--------------|---------------|----------------------------------------------------------------------------|-----------|--------|---------|---------|
| 1422620_s_at | Ppap2a        | phosphatidic acid phosphatase type 2A                                      | NM_008903 | 8.5129 | 10.5397 | -2.0268 |
| 1424587_at   | Gemin8        | gem (nuclear organelle) associated protein 8                               | BC023488  | 6.0824 | 8.1114  | -2.0290 |
| 1455031_at   | Cdk19         | cyclin-dependent kinase 19                                                 | AV278072  | 8.8170 | 10.8477 | -2.0307 |
| 1438266_at   |               |                                                                            | BB764453  | 5.0970 | 7.1280  | -2.0310 |
| 1454858_x_at | Mettl7a1      | methyltransferase like 7A1                                                 | AV171622  | 5.8959 | 7.9291  | -2.0332 |
| 1427817_at   | LOC641050     | uncharacterized protein LOC641050                                          | M11024    | 3.7880 | 5.8212  | -2.0332 |
| 1417141_at   | Igtp          | interferon gamma induced GTPase                                            | NM_018738 | 9.5930 | 11.6295 | -2.0364 |
| 1430590_at   | D3Ert751e     | DNA segment, Chr 3, ERATO Doi 751, expressed                               | BG228878  | 3.2416 | 5.2791  | -2.0375 |
| 1448409_at   | Lrmp          | lymphoid-restricted membrane protein                                       | NM_008511 | 4.8954 | 6.9356  | -2.0402 |
| 1433626_at   | Plscr4        | phospholipid scramblase 4                                                  | BB826296  | 6.8729 | 8.9155  | -2.0426 |
| 1447757_x_at | Inpp5f        | inositol polyphosphate-5-phosphatase F                                     | AV033355  | 6.0989 | 8.1424  | -2.0435 |
| 1417883_at   | Gstt2         | glutathione S-transferase, theta 2                                         | BC012707  | 4.4196 | 6.4639  | -2.0443 |
| 1418365_at   | Ctsh          | cathepsin H                                                                | NM_007801 | 5.8724 | 7.9181  | -2.0457 |
| 1426509_s_at | Gfap          | glial fibrillary acidic protein                                            | BB183081  | 3.9701 | 6.0186  | -2.0485 |
| 1433891_at   | Lgr4          | leucine-rich repeat-containing G protein-coupled receptor 4                | BI107632  | 8.3532 | 10.4019 | -2.0486 |
| 1416432_at   | Pfkfb3        | 6-phosphofructo-2-kinase/fructose-2,6-biphosphatase 3                      | NM_133232 | 4.6711 | 6.7217  | -2.0506 |
| 1430379_at   |               |                                                                            | BM220939  | 3.6732 | 5.7245  | -2.0514 |
| 1427951_s_at | Ccdc28a       | coiled-coil domain containing 28A                                          | BG141739  | 5.9357 | 7.9880  | -2.0523 |
| 1455020_at   | Snx25         | sorting nexin 25                                                           | AV351081  | 8.1740 | 10.2271 | -2.0530 |
| 1436502_at   | Mtus1         | mitochondrial tumor suppressor 1                                           | BB747681  | 4.3083 | 6.3618  | -2.0535 |
| 1460734_at   | Col9a3        | collagen, type IX, alpha 3                                                 | BG074456  | 5.6701 | 7.7248  | -2.0547 |
| 1438236_at   | Nfia          | nuclear factor I/A                                                         | BB485864  | 4.2807 | 6.3376  | -2.0569 |
| 1455649_at   | Ttc9          | tetratricopeptide repeat domain 9                                          | BB106428  | 5.2457 | 7.3026  | -2.0569 |
| 1419308_at   | Invs          | inversin                                                                   | NM_010569 | 5.4443 | 7.5015  | -2.0572 |
| 1440199_at   | Slc25a48      | solute carrier family 25, member 48                                        | AU042494  | 4.4258 | 6.4845  | -2.0587 |
| 1428192_at   | Kbtbd7        | kelch repeat and BTB (POZ) domain containing 7                             | AK003597  | 4.5566 | 6.6154  | -2.0588 |
| 1422573_at   | Ampd3         | adenosine monophosphate deaminase 3                                        | D85596    | 6.1807 | 8.2413  | -2.0605 |
| 1422619_at   | Ppap2a        | phosphatidic acid phosphatase type 2A                                      | NM_008903 | 8.9274 | 10.9884 | -2.0610 |
| 1453284_at   | Fam151b       | family with sequence similarity 151, member B                              | AK015100  | 4.0372 | 6.0989  | -2.0617 |
| 1418240_at   | Gbp2          | guanylate binding protein 2                                                | NM_010260 | 8.1660 | 10.2283 | -2.0623 |
| 1429260_at   |               |                                                                            | AW985991  | 3.2057 | 5.2685  | -2.0628 |
| 1445408_at   | Dnaic2        | dynein, axonemal, intermediate chain 2                                     | BB195298  | 5.0569 | 7.1197  | -2.0628 |
| 1457267_at   | A130010J15Rik | RIKEN cDNA A130010J15 gene                                                 | BB667685  | 5.6402 | 7.7042  | -2.0639 |
| 1430802_at   |               |                                                                            | AK013097  | 6.2392 | 8.3032  | -2.0640 |
| 1433553_at   | Garnl3        | GTPase activating RANGAP domain-like 3                                     | BB131106  | 4.4196 | 6.4845  | -2.0649 |
| 1436220_at   | Zfp287        | zinc finger protein 287                                                    | BI714160  | 5.9014 | 7.9689  | -2.0675 |
| 1429447_at   | Evc2          | Ellis van Creveld syndrome 2                                               | AK003753  | 7.8709 | 9.9389  | -2.0680 |
| 1435669_at   | Zfp532        | zinc finger protein 532                                                    | BB404446  | 6.1186 | 8.1892  | -2.0706 |
| 1423005_a_at | Espn          | espin                                                                      | NM_019585 | 4.2986 | 6.3729  | -2.0742 |
| 1456439_x_at | Mical1        | microtubule associated monooxygenase, calponin and LIM domain containing 1 | BB209438  | 5.9119 | 7.9873  | -2.0754 |
| 1456494_a_at |               |                                                                            | BG068242  | 6.7532 | 8.8304  | -2.0772 |
| 1416204_at   | Gpd1          | glycerol-3-phosphate dehydrogenase 1 (soluble)                             | BC019391  | 4.9150 | 6.9963  | -2.0813 |
| 1448380_at   | Lgals3bp      | lectin, galactoside-binding, soluble, 3 binding protein                    | NM_011150 | 8.5861 | 10.6676 | -2.0815 |
| 1448507_at   | Efhd1         | EF hand domain containing 1                                                | BC019531  | 4.9673 | 7.0503  | -2.0830 |
| 1440354_at   | Elovl7        | ELOVL family member 7, elongation of long chain fatty acids (yeast)        | BB149977  | 4.0956 | 6.1807  | -2.0852 |
| 1439734_at   |               |                                                                            | BB767109  | 4.9937 | 7.0790  | -2.0853 |
| 1430291_at   | Dock5         | dedicator of cytokinesis 5                                                 | AK004325  | 7.0143 | 9.1004  | -2.0861 |
| 1454972_at   | Atcay         | ataxia, cerebellar, Cayman type homolog (human)                            | BQ042885  | 5.6110 | 7.6973  | -2.0862 |
| 1424831_at   | Cpne2         | copine II                                                                  | BC023348  | 7.1140 | 9.2018  | -2.0878 |
| 1451912_a_at | Fgfr1         | fibroblast growth factor receptor-like 1                                   | AF321301  | 8.3586 | 10.4464 | -2.0878 |
| 1418490_at   | Sdsl          | serine dehydratase-like                                                    | NM_133902 | 5.7615 | 7.8510  | -2.0895 |
| 1433571_at   | Serinc5       | serine incorporator 5                                                      | BQ175260  | 7.1080 | 9.1994  | -2.0914 |
| 1417558_at   | Fyn           | Fyn proto-oncogene                                                         | NM_008054 | 6.9219 | 9.0137  | -2.0917 |
| 1416897_at   | Parp9         | poly (ADP-ribose) polymerase family, member 9                              | NM_030253 | 8.7725 | 10.8654 | -2.0929 |
| 1429448_s_at | Tet1          | tet methylcytosine dioxygenase 1                                           | BM240219  | 4.5828 | 6.6786  | -2.0959 |
| 1418959_at   | Tmprss5       | transmembrane protease, serine 5 (spinesin)                                | NM_030709 | 4.9713 | 7.0683  | -2.0970 |
| 1451349_at   | Efcab7        | EF-hand calcium binding domain 7                                           | BC020077  | 7.4828 | 9.5807  | -2.0979 |

|              |               |                                                                            |           |         |         |         |
|--------------|---------------|----------------------------------------------------------------------------|-----------|---------|---------|---------|
| 1431189_a_at | Fahd2a        | fumarylacetoacetate hydrolase domain containing 2A                         | BI872590  | 4.3588  | 6.4574  | -2.0986 |
| 1451173_at   | Lrrc49        | leucine rich repeat containing 49                                          | BC016574  | 4.5566  | 6.6564  | -2.0998 |
| 1426883_at   | Slc25a45      | solute carrier family 25, member 45                                        | AV300228  | 6.0899  | 8.1925  | -2.1026 |
| 1433868_at   | Btbd3         | BTB (POZ) domain containing 3                                              | AV028445  | 8.7622  | 10.8677 | -2.1055 |
| 1451989_a_at | Mapre2        | microtubule-associated protein, RP/EB family, member 2                     | BC027056  | 8.8705  | 10.9770 | -2.1065 |
| 1424634_at   | Tceal1        | transcription elongation factor A (SII)-like 1                             | BC011290  | 5.4443  | 7.5511  | -2.1067 |
| 1424797_a_at | Pitx2         | paired-like homeodomain transcription factor 2                             | U80011    | 2.8966  | 5.0041  | -2.1075 |
| 1437341_x_at | Cnp           | 2',3'-cyclic nucleotide 3' phosphodiesterase                               | BB251922  | 9.9565  | 12.0664 | -2.1099 |
| 1428122_s_at | Fam125b       | family with sequence similarity 125, member B                              | AK012178  | 8.3087  | 10.4187 | -2.1100 |
| 1441228_at   | Apold1        | apolipoprotein L domain containing 1                                       | BM123813  | 5.7781  | 7.8900  | -2.1119 |
| 1439971_at   | 6330439K17Rik | RIKEN cDNA 6330439K17 gene                                                 | AV328193  | 3.9348  | 6.0489  | -2.1141 |
| 1456161_at   | 0610040B10Rik | RIKEN cDNA 0610040B10 gene                                                 | BE198048  | 3.6847  | 5.7990  | -2.1143 |
| 1423443_at   | Slc4a8        | solute carrier family 4 (anion exchanger), member 8                        | BB183341  | 5.4443  | 7.5587  | -2.1144 |
| 1416759_at   | Mical1        | microtubule associated monooxygenase, calponin and LIM domain containing 1 | NM_138315 | 5.2084  | 7.3238  | -2.1154 |
| 1421194_at   | Itga4         | integrin alpha 4                                                           | NM_010576 | 4.1035  | 6.2200  | -2.1165 |
| 1430776_s_at | Ankrd24       | ankyrin repeat domain 24                                                   | AK017778  | 6.9823  | 9.1012  | -2.1189 |
| 1423597_at   | Atp8a1        | ATPase, aminophospholipid transporter (APLT), class I, type 8A, member 1   | BB303874  | 6.1607  | 8.2802  | -2.1195 |
| 1416666_at   | Serpine2      | serine (or cysteine) peptidase inhibitor, clade E, member 2                | NM_009255 | 4.9195  | 7.0438  | -2.1244 |
| 1419853_a_at | P2rx7         | purinergic receptor P2X, ligand-gated ion channel, 7                       | AI552982  | 6.9887  | 9.1134  | -2.1247 |
| 1417133_at   | Pmp22         | peripheral myelin protein 22                                               | NM_008885 | 8.3725  | 10.4974 | -2.1249 |
| 1433454_at   | Abtb2         | ankyrin repeat and BTB (POZ) domain containing 2                           | BB621938  | 6.8057  | 8.9315  | -2.1257 |
| 1451301_at   | Tmod2         | tropomodulin 2                                                             | BB633110  | 4.5163  | 6.6421  | -2.1257 |
| 1423891_at   | Gstt3         | glutathione S-transferase, theta 3                                         | BC003903  | 4.2566  | 6.3832  | -2.1266 |
| 1438530_at   | Tfpi          | tissue factor pathway inhibitor                                            | BB756069  | 6.4574  | 8.5848  | -2.1274 |
| 1451139_at   | Slc39a4       | solute carrier family 39 (zinc transporter), member 4                      | BC023498  | 5.0107  | 7.1383  | -2.1276 |
| 1452480_at   | 4930529M08Rik | RIKEN cDNA 4930529M08 gene                                                 | BC024760  | 4.0928  | 6.2205  | -2.1276 |
| 1426278_at   | Ifi2712a      | interferon, alpha-inducible protein 27 like 2A                             | AY090098  | 10.5545 | 12.6833 | -2.1288 |
| 1442902_at   | Qrich2        | glutamine rich 2                                                           | BG069309  | 3.9251  | 6.0539  | -2.1288 |
| 1434326_x_at | Coro2b        | coronin, actin binding protein, 2B                                         | BB317923  | 6.6564  | 8.7853  | -2.1289 |
| 1439618_at   | Pde10a        | phosphodiesterase 10A                                                      | AI448308  | 2.8800  | 5.0107  | -2.1308 |
| 1417782_at   | Lass4         | LAG1 homolog, ceramide synthase 4                                          | BB006809  | 4.4668  | 6.5981  | -2.1313 |
| 1424916_x_at | Zfp764        | zinc finger protein 764                                                    | BC026397  | 5.7245  | 7.8572  | -2.1327 |
| 1429013_at   | Mtap7d2       | MAP7 domain containing 2                                                   | AK021126  | 4.4113  | 6.5452  | -2.1338 |
| 1425810_a_at | Csrp1         | cysteine and glycine-rich protein 1                                        | BF124540  | 8.2905  | 10.4247 | -2.1342 |
| 1423878_at   | Gypc          | glycophorin C                                                              | BC027408  | 5.6970  | 7.8321  | -2.1351 |
| 1416579_a_at | Epcam         | epithelial cell adhesion molecule                                          | BC005618  | 4.1354  | 6.2707  | -2.1353 |
| 1418211_at   | Oca2          | oculocutaneous albinism II                                                 | NM_021879 | 4.6265  | 6.7638  | -2.1372 |
| 1436326_at   | Rora          | RAR-related orphan receptor alpha                                          | BB306272  | 3.9820  | 6.1198  | -2.1378 |
| 1442129_at   | 1810058I24Rik | RIKEN cDNA 1810058I24 gene                                                 | AI848234  | 5.0952  | 7.2345  | -2.1392 |
| 1438237_at   |               |                                                                            | BM198106  | 6.0217  | 8.1609  | -2.1392 |
| 1456333_a_at | Arhgap6       | Rho GTPase activating protein 6                                            | BB367529  | 5.6291  | 7.7687  | -2.1395 |
| 1449443_at   | Decr1         | 2,4-dienoyl CoA reductase 1, mitochondrial                                 | NM_026172 | 5.4185  | 7.5587  | -2.1402 |
| 1458706_at   |               |                                                                            | AW494074  | 5.3321  | 7.4744  | -2.1423 |
| 1430252_at   | 3110027N22Rik | RIKEN cDNA 3110027N22 gene                                                 | BB753814  | 4.8017  | 6.9450  | -2.1432 |
| 1428870_at   | Nolc1         | nucleolar and coiled-body phosphoprotein 1                                 | BM213850  | 7.2481  | 9.3913  | -2.1432 |
| 1430323_at   |               |                                                                            | AK006737  | 4.1926  | 6.3376  | -2.1450 |
| 1451990_at   | Mapre2        | microtubule-associated protein, RP/EB family, member 2                     | BC027056  | 5.0401  | 7.1853  | -2.1452 |
| 1427196_at   | Wnk4          | WNK lysine deficient protein kinase 4                                      | BG074348  | 5.4443  | 7.5899  | -2.1455 |
| 1449909_at   | 2010005H15Rik | RIKEN cDNA 2010005H15 gene                                                 | NM_029733 | 4.1035  | 6.2501  | -2.1466 |
| 1427469_at   | Helz          | helicase with zinc finger domain                                           | BI251153  | 5.9849  | 8.1321  | -2.1472 |
| 1452204_at   | Anks1         | ankyrin repeat and SAM domain containing 1                                 | BB325223  | 7.2692  | 9.4166  | -2.1474 |
| 1425660_at   | Btbd3         | BTB (POZ) domain containing 3                                              | BC018174  | 5.7913  | 7.9387  | -2.1474 |
| 1418392_a_at | Gbp3          | guanylate binding protein 3                                                | NM_018734 | 9.0554  | 11.2031 | -2.1476 |
| 1440196_at   |               |                                                                            | BB207611  | 4.7725  | 6.9213  | -2.1488 |
| 1418980_a_at | Cnp           | 2',3'-cyclic nucleotide 3' phosphodiesterase                               | M58045    | 6.7665  | 8.9155  | -2.1490 |
| 1424419_at   | Lrrc14        | leucine rich repeat containing 14                                          | BC022126  | 6.2224  | 8.3716  | -2.1492 |

|              |               |                                                                                   |           |        |         |         |
|--------------|---------------|-----------------------------------------------------------------------------------|-----------|--------|---------|---------|
| 1431008_at   |               |                                                                                   | BG916808  | 6.2777 | 8.4271  | -2.1495 |
| 1422596_at   | Nkain4        | Na <sup>+</sup> /K <sup>+</sup> transporting ATPase interacting 4                 | NM_021426 | 5.5512 | 7.7020  | -2.1508 |
| 1449296_a_at | Cnp           | 2',3'-cyclic nucleotide 3' phosphodiesterase                                      | M58045    | 7.1097 | 9.2615  | -2.1518 |
| 1420583_a_at | Rora          | RAR-related orphan receptor alpha                                                 | NM_013646 | 3.7586 | 5.9119  | -2.1533 |
| 1425937_a_at | Hexim1        | hexamethylene bis-acetamide inducible 1                                           | BC022111  | 8.8357 | 10.9894 | -2.1537 |
| 1423457_at   | Slc35a5       | solute carrier family 35, member A5                                               | BB778934  | 5.9830 | 8.1372  | -2.1542 |
| 1449471_at   | Kcnmb4        | potassium large conductance calcium-activated channel, subfamily M, beta member 4 | NM_021452 | 5.9071 | 8.0618  | -2.1547 |
| 1448660_at   | Arhgdig       | Rho GDP dissociation inhibitor (GDI) gamma                                        | NM_008113 | 5.3414 | 7.4967  | -2.1553 |
| 1434380_at   | Gbp7          | guanylate binding protein 7                                                       | BM241271  | 8.9609 | 11.1171 | -2.1562 |
| 1417960_at   | Cpeb1         | cytoplasmic polyadenylation element binding protein 1                             | NM_007755 | 3.5848 | 5.7515  | -2.1668 |
| 1429178_at   | Odz3          | odd Oz/ten-m homolog 3 (Drosophila)                                               | BB472509  | 7.3768 | 9.5447  | -2.1679 |
| 1448755_at   | Col15a1       | collagen, type XV, alpha 1                                                        | AF011450  | 5.0970 | 7.2656  | -2.1687 |
| 1442957_at   | G730013B05Rik | RIKEN cDNA G730013B05 gene                                                        | BG075059  | 8.0975 | 10.2662 | -2.1687 |
| 1438931_s_at | Sesn1         | sestrin 1                                                                         | AV016566  | 6.8212 | 8.9931  | -2.1719 |
| 1424420_at   | Ccpg1         | cell cycle progression 1                                                          | BC006717  | 5.6110 | 7.7871  | -2.1761 |
| 1450884_at   | Cd36          | CD36 antigen                                                                      | BB534670  | 2.8337 | 5.0107  | -2.1770 |
| 1457024_x_at | Slc35a2       | solute carrier family 35 (UDP-galactose transporter), member A2                   | BB375649  | 7.1432 | 9.3211  | -2.1779 |
| 1417704_a_at | Arhgap6       | Rho GTPase activating protein 6                                                   | NM_009707 | 5.1894 | 7.3681  | -2.1788 |
| 1422558_at   | Gamt          | guanidinoacetate methyltransferase                                                | AF015887  | 7.4224 | 9.6040  | -2.1816 |
| 1457426_at   | 1700048O20Rik | RIKEN cDNA 1700048O20 gene                                                        | BE980678  | 3.7049 | 5.8877  | -2.1828 |
| 1449191_at   | Wfdc12        | WAP four-disulfide core domain 12                                                 | NM_138684 | 5.7245 | 7.9081  | -2.1836 |
| 1425113_x_at |               |                                                                                   | BC020068  | 7.1689 | 9.3529  | -2.1840 |
| 1430292_a_at | 1810030N24Rik | RIKEN cDNA 1810030N24 gene                                                        | BG792484  | 7.5511 | 9.7351  | -2.1840 |
| 1452992_at   | Cdc26         | cell division cycle 26                                                            | AK008199  | 6.1193 | 8.3037  | -2.1844 |
| 1421349_x_at | Cend1         | cell cycle exit and neuronal differentiation 1                                    | NM_021316 | 2.8350 | 5.0212  | -2.1862 |
| 1429736_at   | Qk            | quaking                                                                           | BB659256  | 5.5091 | 7.6973  | -2.1881 |
| 1440815_x_at |               |                                                                                   | BB099075  | 6.8539 | 9.0424  | -2.1885 |
| 1434989_at   |               |                                                                                   | BQ176485  | 4.6531 | 6.8439  | -2.1909 |
| 1441891_x_at | Elovl7        | ELOVL family member 7, elongation of long chain fatty acids (yeast)               | BB338945  | 6.9828 | 9.1746  | -2.1918 |
| 1419418_a_at | Morc1         | microrchidia 1                                                                    | NM_010816 | 5.7245 | 7.9181  | -2.1936 |
| 1426917_s_at | Scrn3         | secernin 3                                                                        | BM211317  | 6.4211 | 8.6155  | -2.1943 |
| 1457704_at   | Zfp385b       | zinc finger protein 385B                                                          | BE982894  | 5.3765 | 7.5716  | -2.1950 |
| 1417928_at   | Pdlim4        | PDZ and LIM domain 4                                                              | NM_019417 | 8.8944 | 11.0898 | -2.1954 |
| 1444632_at   | BC064078      | cDNA sequence BC064078                                                            | BF658882  | 3.8523 | 6.0489  | -2.1966 |
| 1438349_at   | Zfp229        | zinc finger protein 229                                                           | BG069331  | 5.2500 | 7.4474  | -2.1974 |
| 1455700_at   | Mterfd3       | MTERF domain containing 3                                                         | BB359043  | 6.3175 | 8.5178  | -2.2004 |
| 1436990_s_at |               |                                                                                   | AA038464  | 8.4967 | 10.6980 | -2.2013 |
| 1439512_at   | 5830444B04Rik | RIKEN cDNA 5830444B04 gene                                                        | BB029399  | 4.1751 | 6.3774  | -2.2023 |
| 1448241_at   | Gm2a          | GM2 ganglioside activator protein                                                 | BC004651  | 8.3072 | 10.5097 | -2.2024 |
| 1448890_at   | Klf2          | Kruppel-like factor 2 (lung)                                                      | NM_008452 | 5.4771 | 7.6809  | -2.2038 |
| 1436324_at   | Stard9        | START domain containing 9                                                         | BB427728  | 5.5091 | 7.7155  | -2.2064 |
| 1435906_x_at | Gbp2          | guanylate binding protein 2                                                       | BE197524  | 8.5270 | 10.7361 | -2.2091 |
| 1449389_at   | Tal1          | T cell acute lymphocytic leukemia 1                                               | NM_011527 | 3.8342 | 6.0435  | -2.2093 |
| 1418953_at   | Fbxo16        | F-box protein 16                                                                  | NM_015795 | 4.2966 | 6.5078  | -2.2112 |
| 1415818_at   | Anxa6         | annexin A6                                                                        | NM_013472 | 6.9113 | 9.1238  | -2.2125 |
| 1431400_a_at | Gas7          | growth arrest specific 7                                                          | AK017394  | 5.8367 | 8.0499  | -2.2131 |
| 1441170_a_at | Dab2ip        | disabled 2 interacting protein                                                    | BB531641  | 6.1173 | 8.3333  | -2.2160 |
| 1430842_at   | 1500002F19Rik | RIKEN cDNA 1500002F19 gene                                                        | AK005115  | 3.1070 | 5.3240  | -2.2171 |
| 1442977_at   |               |                                                                                   | BG075843  | 5.3499 | 7.5689  | -2.2190 |
| 1428800_a_at | Pus7l         | pseudouridylate synthase 7 homolog (S. cerevisiae)-like                           | AK019372  | 6.9327 | 9.1528  | -2.2201 |
| 1421960_at   | Adcy3         | adenylate cyclase 3                                                               | AF458089  | 5.8107 | 8.0309  | -2.2202 |
| 1428375_at   | 4932415G12Rik | RIKEN cDNA 4932415G12 gene                                                        | AK015136  | 4.0372 | 6.2582  | -2.2210 |
| 1458949_at   | 5330434G04Rik | RIKEN cDNA 5330434G04 gene                                                        | BB750951  | 3.3086 | 5.5301  | -2.2215 |
| 1454756_at   | Lrch3         | leucine-rich repeats and calponin homology (CH) domain containing 3               | BB763476  | 8.2417 | 10.4658 | -2.2241 |
| 1455466_at   | Gpr133        | G protein-coupled receptor 133                                                    | BB548889  | 4.7807 | 7.0061  | -2.2254 |
| 1436150_at   | 2310028H24Rik | RIKEN cDNA 2310028H24 gene                                                        | BB391675  | 4.6713 | 6.8973  | -2.2261 |
| 1425811_a_at | Csrp1         | cysteine and glycine-rich protein 1                                               | BF124540  | 8.7847 | 11.0121 | -2.2273 |
| 1435605_at   | Actr3b        | ARP3 actin-related protein 3B                                                     | BB125424  | 4.2135 | 6.4409  | -2.2274 |
| 1424568_at   | Tspan2        | tetraspanin 2                                                                     | BC007185  | 6.2262 | 8.4548  | -2.2287 |
| 1435596_at   | Pion          | pigeon homolog (Drosophila)                                                       | BB820613  | 6.9948 | 9.2237  | -2.2289 |



|              |               |                                                                                |           |        |         |         |
|--------------|---------------|--------------------------------------------------------------------------------|-----------|--------|---------|---------|
| 1460274_at   | Tex19.2       | testis expressed gene 19.2                                                     | NM_027622 | 4.7040 | 6.9332  | -2.2292 |
| 1455297_at   | Spin2         | spindlin family, member 2                                                      | BG070258  | 4.9657 | 7.1952  | -2.2294 |
| 1424097_at   | Elovl7        | ELOVL family member 7, elongation of long chain fatty acids (yeast)            | BC005602  | 6.5341 | 8.7645  | -2.2303 |
| 1436277_at   | Rnf207        | ring finger protein 207                                                        | BI734893  | 4.6674 | 6.8998  | -2.2324 |
| 1421381_a_at | Col9a1        | collagen, type IX, alpha 1                                                     | NM_007740 | 5.8632 | 8.0956  | -2.2325 |
| 1415677_at   | Dhrs1         | dehydrogenase/reductase (SDR family) member 1                                  | NM_026819 | 8.9121 | 11.1473 | -2.2352 |
| 1417496_at   | Cp            | ceruloplasmin                                                                  | BB332449  | 6.4601 | 8.6954  | -2.2353 |
| 1434788_at   | Fzd3          | frizzled homolog 3 (Drosophila)                                                | BQ175713  | 6.5249 | 8.7615  | -2.2366 |
| 1448548_at   | Tulp4         | tubby like protein 4                                                           | NM_054040 | 9.8967 | 12.1337 | -2.2370 |
| 1448830_at   | Dusp1         | dual specificity phosphatase 1                                                 | NM_013642 | 9.3928 | 11.6299 | -2.2371 |
| 1448426_at   | Sardh         | sarcosine dehydrogenase                                                        | BI217574  | 4.7903 | 7.0284  | -2.2381 |
| 1415951_at   | Fkbp10        | FK506 binding protein 10                                                       | NM_010221 | 6.5638 | 8.8025  | -2.2387 |
| 1427795_s_at |               |                                                                                | BC021394  | 3.6732 | 5.9119  | -2.2387 |
| 1458648_at   | AU042950      | expressed sequence AU042950                                                    | AU042950  | 3.5127 | 5.7515  | -2.2388 |
| 1417889_at   | Apobec2       | apolipoprotein B mRNA editing enzyme, catalytic polypeptide 2                  | NM_009694 | 4.9392 | 7.1787  | -2.2395 |
| 1425156_at   | Gbp7          | guanylate binding protein 7                                                    | BC010229  | 8.5970 | 10.8375 | -2.2406 |
| 1433711_s_at | Sesn1         | sestrin 1                                                                      | BG076140  | 7.8572 | 10.0983 | -2.2411 |
| 1419248_at   | Rgs2          | regulator of G-protein signaling 2                                             | AF215668  | 4.7629 | 7.0061  | -2.2431 |
| 1441022_at   | Arih1         | ariadne ubiquitin-conjugating enzyme E2 binding protein homolog 1 (Drosophila) | BB354785  | 5.1856 | 7.4308  | -2.2452 |
| 1456543_at   | Prokr1        | prokineticin receptor 1                                                        | BB037474  | 5.3992 | 7.6454  | -2.2461 |
| 1418981_at   | Casp12        | caspase 12                                                                     | NM_009808 | 7.0861 | 9.3337  | -2.2476 |
| 1429007_at   | Slc35b2       | solute carrier family 35, member B2                                            | AK003377  | 6.4952 | 8.7436  | -2.2484 |
| 1454075_s_at | Nudt13        | nudix (nucleoside diphosphate linked moiety X)-type motif 13                   | BC021366  | 6.4341 | 8.6826  | -2.2484 |
| 1451058_at   | Mcts2         | malignant T cell amplified sequence 2                                          | AV017653  | 5.2514 | 7.5015  | -2.2501 |
| 1433558_at   | Dab2ip        | disabled 2 interacting protein                                                 | BM231046  | 6.0646 | 8.3199  | -2.2553 |
| 1429592_at   | Lhfp13        | lipoma HMGIC fusion partner-like 3                                             | BB274911  | 3.6732 | 5.9326  | -2.2595 |
| 1427747_a_at | Lcn2          | lipocalin 2                                                                    | X14607    | 3.7420 | 6.0040  | -2.2620 |
| 1449146_at   | Notch4        | notch 4                                                                        | NM_010929 | 3.3923 | 5.6564  | -2.2641 |
| 1418412_at   | Tpd5211       | tumor protein D52-like 1                                                       | NM_009413 | 6.4629 | 8.7309  | -2.2680 |
| 1434151_at   | Mettl7a1      | methyltransferase like 7A1                                                     | AV171622  | 5.6772 | 7.9457  | -2.2685 |
| 1428303_at   | Btbd17        | BTB (POZ) domain containing 17                                                 | AK005160  | 4.5022 | 6.7709  | -2.2687 |
| 1424974_at   | Zfp418        | zinc finger protein 418                                                        | BC024761  | 3.4282 | 5.6970  | -2.2688 |
| 1437858_at   | Dpy19l3       | dpy-19-like 3 (C. elegans)                                                     | AV367203  | 5.0904 | 7.3616  | -2.2712 |
| 1430153_at   | Tmod2         | tropomodulin 2                                                                 | AK018223  | 3.2576 | 5.5301  | -2.2725 |
| 1460447_at   | Pus7l         | pseudouridylate synthase 7 homolog (S. cerevisiae)-like                        | AK019372  | 6.0374 | 8.3108  | -2.2734 |
| 1422550_a_at | Mtap6         | microtubule-associated protein 6                                               | NM_010837 | 6.2987 | 8.5738  | -2.2751 |
| 1424393_s_at | Adhfe1        | alcohol dehydrogenase, iron containing, 1                                      | BC026584  | 3.9836 | 6.2602  | -2.2766 |
| 1417494_a_at | Cp            | ceruloplasmin                                                                  | BB332449  | 8.9096 | 11.1867 | -2.2771 |
| 1436528_at   | Kazald1       | Kazal-type serine peptidase inhibitor domain 1                                 | AI842353  | 6.1246 | 8.4023  | -2.2777 |
| 1431780_at   | Cdhr4         | cadherin-related family member 4                                               | AK006216  | 4.2333 | 6.5111  | -2.2778 |
| 1428803_at   | Acot6         | acyl-CoA thioesterase 6                                                        | AK014558  | 5.1383 | 7.4168  | -2.2785 |
| 1427044_a_at | Amph          | amphiphysin                                                                    | BQ177140  | 3.1314 | 5.4108  | -2.2795 |
| 1449315_at   | Odz3          | odd Oz/ten-m homolog 3 (Drosophila)                                            | NM_011857 | 9.2889 | 11.5687 | -2.2798 |
| 1424795_a_at | 1700001O22Rik | RIKEN cDNA 1700001O22 gene                                                     | BC023044  | 4.4866 | 6.7691  | -2.2825 |
| 1434725_at   | Gramd1c       | GRAM domain containing 1C                                                      | AV255657  | 4.0372 | 6.3197  | -2.2825 |
| 1422945_a_at | Kif5c         | kinesin family member 5C                                                       | AI844677  | 4.9224 | 7.2050  | -2.2826 |
| 1416882_at   | Rgs10         | regulator of G-protein signalling 10                                           | NM_026418 | 6.1835 | 8.4671  | -2.2836 |
| 1421841_at   | Fgfr3         | fibroblast growth factor receptor 3                                            | NM_008010 | 6.8313 | 9.1160  | -2.2847 |
| 1448789_at   | Aldh1a3       | aldehyde dehydrogenase family 1, subfamily A3                                  | AF253409  | 5.0826 | 7.3681  | -2.2855 |
| 1429888_a_at | Hspb2         | heat shock protein 2                                                           | AK012780  | 6.0340 | 8.3244  | -2.2904 |
| 1434780_at   | Mtus2         | microtubule associated tumor suppressor candidate 2                            | AU067634  | 4.8558 | 7.1485  | -2.2927 |
| 1452889_at   | Lhpp          | phospholysine phosphohistidine inorganic pyrophosphate phosphatase             | AK009207  | 5.5699 | 7.8634  | -2.2935 |
| 1440286_at   | Fbxl16        | F-box and leucine-rich repeat protein 16                                       | BM232403  | 6.2883 | 8.5818  | -2.2935 |
| 1438256_at   | Eif5a2        | eukaryotic translation initiation factor 5A2                                   | BB129302  | 4.4131 | 6.7079  | -2.2948 |
| 1424098_at   | Elovl7        | ELOVL family member 7, elongation of long chain fatty acids (yeast)            | BC005602  | 5.7952 | 8.0903  | -2.2951 |
| 1458024_at   | Gm4876        | predicted gene 4876                                                            | BB339393  | 3.1156 | 5.4108  | -2.2952 |
| 1424835_at   | Gstm4         | glutathione S-transferase, mu 4                                                | AF464943  | 5.1421 | 7.4391  | -2.2971 |

|              |               |                                                               |           |        |         |         |
|--------------|---------------|---------------------------------------------------------------|-----------|--------|---------|---------|
| 1456423_at   | Mbd5          | methyl-CpG binding domain protein 5                           | AV298746  | 4.3588 | 6.6564  | -2.2977 |
| 1443324_at   |               |                                                               | BI454325  | 4.4942 | 6.7928  | -2.2985 |
| 1439427_at   | Cldn9         | claudin 9                                                     | BB026487  | 4.8818 | 7.1828  | -2.3010 |
| 1435252_at   | B3galt6       | UDP-Gal:betaGal beta 1,3-galactosyltransferase, polypeptide 6 | AV328064  | 3.5815 | 5.8853  | -2.3038 |
| 1430073_at   | Kbtbd11       | kelch repeat and BTB (POZ) domain containing 11               | BB767924  | 5.2685 | 7.5725  | -2.3040 |
| 1438448_at   | Otop1         | otopetrin 1                                                   | BB217568  | 3.4443 | 5.7515  | -2.3073 |
| 1426562_a_at | Olfm1         | olfactomedin 1                                                | BE952082  | 5.0041 | 7.3117  | -2.3077 |
| 1418710_at   | Cd59a         | CD59a antigen                                                 | NM_007652 | 5.7635 | 8.0726  | -2.3091 |
| 1426316_at   | 6330416G13Rik | RIKEN cDNA 6330416G13 gene                                    | AV326978  | 5.8041 | 8.1166  | -2.3124 |
| 1437639_at   | Fam115a       | family with sequence similarity 115, member A                 | BF228051  | 4.8719 | 7.1853  | -2.3134 |
| 1449823_at   | Dach2         | dachshund 2 (Drosophila)                                      | NM_033605 | 4.4196 | 6.7353  | -2.3157 |
| 1450944_at   | Cspg4         | chondroitin sulfate proteoglycan 4                            | BB377873  | 6.0470 | 8.3629  | -2.3158 |
| 1424494_s_at | Flywch2       | FLYWCH family member 2                                        | BC024947  | 5.2976 | 7.6138  | -2.3161 |
| 1451503_at   | Nol3          | nucleolar protein 3 (apoptosis repressor with CARD domain)    | BC027290  | 6.1738 | 8.4927  | -2.3189 |
| 1448737_at   | Tspan7        | tetraspanin 7                                                 | AF052492  | 6.9094 | 9.2293  | -2.3199 |
| 1455393_at   | Cp            | ceruloplasmin                                                 | BB009037  | 6.8564 | 9.1766  | -2.3202 |
| 1423669_at   | Col1a1        | collagen, type I, alpha 1                                     | U08020    | 4.9915 | 7.3117  | -2.3203 |
| 1433667_at   | Lgi3          | leucine-rich repeat LGI family, member 3                      | BB187947  | 3.9790 | 6.2993  | -2.3203 |
| 1435835_at   | Mks1          | Meckel syndrome, type 1                                       | BB033151  | 5.3001 | 7.6211  | -2.3211 |
| 1440825_s_at | Ccdc28a       | coiled-coil domain containing 28A                             | AV100366  | 6.7255 | 9.0484  | -2.3229 |
| 1434658_at   | 3110056O03Rik | RIKEN cDNA 3110056O03 gene                                    | BB333439  | 7.3646 | 9.6890  | -2.3244 |
| 1433944_at   |               |                                                               | AV256030  | 4.6221 | 6.9471  | -2.3250 |
| 1424653_at   | Tspan15       | tetraspanin 15                                                | BC003872  | 7.7194 | 10.0451 | -2.3257 |
| 1451655_at   | Slfn8         | schlafen 8                                                    | BC024709  | 6.6553 | 8.9817  | -2.3264 |
| 1439602_at   | Fign          | fidgetin                                                      | BB344218  | 3.7824 | 6.1115  | -2.3291 |
| 1429735_at   | Qk            | quaking                                                       | BB659256  | 6.2554 | 8.5845  | -2.3291 |
| 1437863_at   | Bche          | butyrylcholinesterase                                         | BB667762  | 4.0426 | 6.3729  | -2.3303 |
| 1428512_at   | Bhlhb9        | basic helix-loop-helix domain containing, class B9            | AK012577  | 8.1440 | 10.4758 | -2.3318 |
| 1433586_at   | Rgmb          | RGM domain family, member B                                   | BB612707  | 6.7897 | 9.1238  | -2.3341 |
| 1429012_at   | Arhgef6       | Rac/Cdc42 guanine nucleotide exchange factor (GEF) 6          | BM246754  | 6.1388 | 8.4739  | -2.3351 |
| 1418638_at   |               |                                                               | NM_010387 | 4.8496 | 7.1853  | -2.3357 |
| 1455398_at   | Lrrc8c        | leucine rich repeat containing 8 family, member C             | BB333759  | 8.4383 | 10.7752 | -2.3370 |
| 1441964_at   | Qk            | quaking                                                       | BB069531  | 5.4498 | 7.7871  | -2.3372 |
| 1457059_at   | Zfp438        | zinc finger protein 438                                       | BB333562  | 4.6127 | 6.9527  | -2.3400 |
| 1452604_at   | Stard13       | StAR-related lipid transfer (START) domain containing 13      | BB667840  | 6.8057 | 9.1477  | -2.3420 |
| 1452381_at   | Creb3l2       | cAMP responsive element binding protein 3-like 2              | AV021105  | 7.9941 | 10.3375 | -2.3434 |
| 1419056_at   | Rtn2          | reticulon 2 (Z-band associated protein)                       | AF038538  | 4.4791 | 6.8247  | -2.3456 |
| 1444749_at   |               |                                                               | BB427399  | 3.5127 | 5.8611  | -2.3484 |
| 1434945_at   | Lpcat2        | lysophosphatidylcholine acyltransferase 2                     | AW743924  | 9.3341 | 11.6825 | -2.3484 |
| 1452353_at   | Gpr155        | G protein-coupled receptor 155                                | BB762731  | 4.0237 | 6.3729  | -2.3492 |
| 1441105_at   | Gm11110       | predicted gene 11110                                          | BE980314  | 4.3688 | 6.7187  | -2.3499 |
| 1435916_at   | Zfp84         | zinc finger protein 84                                        | BG067388  | 3.9043 | 6.2582  | -2.3539 |
| 1451860_a_at | Trim30a       | tripartite motif-containing 30A                               | AF220015  | 7.5278 | 9.8818  | -2.3540 |
| 1424719_a_at | Mapt          | microtubule-associated protein tau                            | M18775    | 4.9195 | 7.2750  | -2.3555 |
| 1455362_at   | Angel2        | angel homolog 2 (Drosophila)                                  | AV275390  | 4.8229 | 7.1787  | -2.3558 |
| 1418917_at   | Hebp2         | heme binding protein 2                                        | NM_019487 | 5.2346 | 7.5915  | -2.3569 |
| 1439516_at   | 2610201A13Rik | RIKEN cDNA 2610201A13 gene                                    | AW488471  | 6.3034 | 8.6613  | -2.3580 |
| 1436395_at   | Card6         | caspase recruitment domain family, member 6                   | BB766747  | 4.7901 | 7.1485  | -2.3583 |
| 1450247_a_at | Scamp5        | secretory carrier membrane protein 5                          | NM_020270 | 6.1627 | 8.5231  | -2.3603 |
| 1431786_s_at | 1190003J15Rik | RIKEN cDNA 1190003J15 gene                                    | AK013117  | 5.4690 | 7.8321  | -2.3631 |
| 1436657_at   | Gm11744       | predicted gene 11744                                          | AW060253  | 5.1639 | 7.5278  | -2.3639 |
| 1416824_at   | B230118H07Rik | RIKEN cDNA B230118H07 gene                                    | NM_026592 | 6.6801 | 9.0477  | -2.3676 |
| 1440884_s_at | A530047J11Rik | RIKEN cDNA A530047J11 gene                                    | BB218047  | 3.1077 | 5.4771  | -2.3694 |
| 1417848_at   | Zfp704        | zinc finger protein 704                                       | AW413620  | 3.9012 | 6.2707  | -2.3695 |
| 1454032_at   | Neto2         | neuropilin (NRP) and tolloid (TLL)-like 2                     | AK017458  | 4.4723 | 6.8439  | -2.3716 |
| 1416164_at   | Fbln5         | fibulin 5                                                     | NM_011812 | 4.4196 | 6.7928  | -2.3732 |
| 1437291_at   | 2700081O15Rik | RIKEN cDNA 2700081O15 gene                                    | AV131166  | 4.4497 | 6.8310  | -2.3812 |
| 1417495_x_at | Cp            | ceruloplasmin                                                 | BB332449  | 8.4507 | 10.8328 | -2.3821 |

|              |               |                                                                                                  |           |        |         |         |
|--------------|---------------|--------------------------------------------------------------------------------------------------|-----------|--------|---------|---------|
| 1433043_at   | Vcan          | versican                                                                                         | AK017328  | 3.3086 | 5.6907  | -2.3821 |
| 1453474_at   | Abhd15        | abhydrolase domain containing 15                                                                 | AI467583  | 3.8112 | 6.1950  | -2.3838 |
| 1454658_at   | Ilvbl         | ilvB (bacterial acetolactate synthase)-like                                                      | BI408416  | 8.0779 | 10.4627 | -2.3847 |
| 1418666_at   | Ptx3          | pentraxin related gene                                                                           | NM_008987 | 3.9701 | 6.3554  | -2.3852 |
| 1449580_s_at |               |                                                                                                  | NM_010388 | 5.4059 | 7.7914  | -2.3855 |
| 1452249_at   | Prickle1      | prickle homolog 1 (Drosophila)                                                                   | BC022643  | 3.0872 | 5.4771  | -2.3899 |
| 1443267_at   |               |                                                                                                  | BB345595  | 3.4443 | 5.8382  | -2.3939 |
| 1434997_at   | Cdk19         | cyclin-dependent kinase 19                                                                       | BB510904  | 7.3056 | 9.7008  | -2.3952 |
| 1452087_at   | Epsti1        | epithelial stromal interaction 1 (breast)                                                        | BF020640  | 5.0115 | 7.4083  | -2.3968 |
| 1438331_at   |               |                                                                                                  | BB491630  | 4.7783 | 7.1764  | -2.3980 |
| 1436568_at   | Jam2          | junction adhesion molecule 2                                                                     | AU016127  | 3.3080 | 5.7061  | -2.3980 |
| 1426193_at   | Otos          | otospiralin                                                                                      | AY078071  | 3.8408 | 6.2392  | -2.3984 |
| 1456838_at   | Lingo3        | leucine rich repeat and Ig domain containing 3                                                   | BE995608  | 5.7171 | 8.1166  | -2.3994 |
| 1438303_at   | Tgfb2         | transforming growth factor, beta 2                                                               | AV246759  | 4.2805 | 6.6801  | -2.3996 |
| 1435842_at   | Nat8l         | N-acetyltransferase 8-like                                                                       | AI644670  | 6.0698 | 8.4712  | -2.4014 |
| 1421644_at   | Slfn3         | schlafen 3                                                                                       | NM_011409 | 2.8966 | 5.3054  | -2.4088 |
| 1422649_at   | Cntn6         | contactin 6                                                                                      | NM_017383 | 3.1496 | 5.5610  | -2.4113 |
| 1418403_at   | Adam19        | a disintegrin and metallopeptidase domain 19 (meltrin beta)                                      | NM_009616 | 3.9240 | 6.3376  | -2.4136 |
| 1446951_at   | P4ha3         | procollagen-proline, 2-oxoglutarate 4-dioxygenase (proline 4-hydroxylase), alpha polypeptide III | BB526042  | 4.9453 | 7.3594  | -2.4141 |
| 1455163_at   | Guf1          | GUF1 GTPase homolog (S. cerevisiae)                                                              | AV351082  | 4.4791 | 6.8973  | -2.4182 |
| 1447771_at   |               |                                                                                                  | AW050081  | 3.4930 | 5.9119  | -2.4189 |
| 1455626_at   | Hoxa9         | homeobox A9                                                                                      | AA987181  | 3.7636 | 6.1857  | -2.4221 |
| 1450206_at   | Dlc1          | deleted in liver cancer 1                                                                        | NM_015802 | 4.1375 | 6.5602  | -2.4227 |
| 1426288_at   | Lrp4          | low density lipoprotein receptor-related protein 4                                               | AF247637  | 3.8158 | 6.2392  | -2.4234 |
| 1420422_at   | Pcdhb21       | protocadherin beta 21                                                                            | NM_053146 | 3.8399 | 6.2639  | -2.4239 |
| 1416051_at   | C2            | complement component 2 (within H-2S)                                                             | NM_013484 | 5.3195 | 7.7451  | -2.4256 |
| 1416188_at   | Gm2a          | GM2 ganglioside activator protein                                                                | BC004651  | 6.4551 | 8.8812  | -2.4262 |
| 1445173_at   | AK129341      | cDNA sequence AK129341                                                                           | BF472675  | 3.6726 | 6.0989  | -2.4263 |
| 1448734_at   | Cp            | ceruloplasmin                                                                                    | BB332449  | 8.1606 | 10.5871 | -2.4265 |
| 1441091_at   | Elovl7        | ELOVL family member 7, elongation of long chain fatty acids (yeast)                              | BQ175164  | 4.0619 | 6.4898  | -2.4280 |
| 1456454_at   | Alx1          | ALX homeobox 1                                                                                   | BB759122  | 3.3086 | 5.7365  | -2.4280 |
| 1450955_s_at | Sort1         | sortilin 1                                                                                       | AV247637  | 4.5566 | 6.9942  | -2.4376 |
| 1425264_s_at | Mbp           | myelin basic protein                                                                             | BB181247  | 5.3765 | 7.8167  | -2.4402 |
| 1429700_at   |               |                                                                                                  | AV000681  | 3.9701 | 6.4110  | -2.4408 |
| 1455172_at   | AU020094      | expressed sequence AU020094                                                                      | BG069639  | 4.3134 | 6.7577  | -2.4442 |
| 1441429_at   | Irs4          | insulin receptor substrate 4                                                                     | BB295945  | 3.7156 | 6.1607  | -2.4451 |
| 1436996_x_at | Lyz1          | lysozyme 1                                                                                       | AV066625  | 3.4443 | 5.8912  | -2.4470 |
| 1435827_at   | 4933404O12Rik | RIKEN cDNA 4933404O12 gene                                                                       | BB501711  | 5.2185 | 7.6668  | -2.4483 |
| 1427029_at   | Htra3         | HtrA serine peptidase 3                                                                          | AK008764  | 4.8580 | 7.3069  | -2.4489 |
| 1437598_at   | Zbtb20        | zinc finger and BTB domain containing 20                                                         | BB308952  | 6.7164 | 9.1671  | -2.4507 |
| 1426604_at   | Rnase1        | ribonuclease L (2', 5'-oligoadenylate synthetase-dependent)                                      | BF714880  | 5.3580 | 7.8087  | -2.4507 |
| 1417693_a_at | Gab1          | growth factor receptor bound protein 2-associated protein 1                                      | NM_021356 | 6.9111 | 9.3646  | -2.4535 |
| 1454984_at   | Lifr          | leukemia inhibitory factor receptor                                                              | AV246615  | 4.1035 | 6.5578  | -2.4543 |
| 1417300_at   | Smpdl3b       | sphingomyelin phosphodiesterase, acid-like 3B                                                    | NM_133888 | 6.4767 | 8.9323  | -2.4557 |
| 1418678_at   | Has2          | hyaluronan synthase 2                                                                            | NM_008216 | 8.3178 | 10.7736 | -2.4558 |
| 1452650_at   | Trim62        | tripartite motif-containing 62                                                                   | AK018173  | 3.5004 | 5.9569  | -2.4566 |
| 1434919_at   | Agps          | alkylglycerone phosphate synthase                                                                | BQ176868  | 5.6970 | 8.1559  | -2.4589 |
| 1448415_a_at | Sema3b        | sema domain, immunoglobulin domain (Ig), short basic domain, secreted, (semaphorin) 3B           | NM_009153 | 6.0588 | 8.5197  | -2.4609 |
| 1416586_at   | Zfp239        | zinc finger protein 239                                                                          | NM_008616 | 6.4572 | 8.9185  | -2.4613 |
| 1425543_s_at | Plekha5       | pleckstrin homology domain containing, family A member 5                                         | BG067450  | 7.3026 | 9.7652  | -2.4626 |
| 1435765_at   | E130114P18Rik | RIKEN cDNA E130114P18 gene                                                                       | BF464487  | 3.3898 | 5.8581  | -2.4683 |
| 1428681_at   | Gm608         | predicted gene 608                                                                               | AK017426  | 6.7665 | 9.2376  | -2.4711 |
| 1417779_at   | Ntpcr         | nucleoside-triphosphatase, cancer-related                                                        | NM_025636 | 6.4409 | 8.9123  | -2.4714 |
| 1449903_at   | Crtam         | cytotoxic and regulatory T cell molecule                                                         | NM_019465 | 4.8188 | 7.2935  | -2.4747 |
| 1417071_s_at | Cyp4v3        | cytochrome P450, family 4, subfamily v, polypeptide 3                                            | NM_133969 | 3.5710 | 6.0489  | -2.4780 |
| 1422869_at   | Mertk         | c-mer proto-oncogene tyrosine kinase                                                             | NM_008587 | 5.3414 | 7.8215  | -2.4801 |
| 1447825_x_at | Pcdh8         | protocadherin 8                                                                                  | BB076893  | 3.5810 | 6.0634  | -2.4824 |

|              |               |                                                                                        |           |        |         |         |
|--------------|---------------|----------------------------------------------------------------------------------------|-----------|--------|---------|---------|
| 1416505_at   | Nr4a1         | nuclear receptor subfamily 4, group A, member 1                                        | NM_010444 | 8.7930 | 11.2770 | -2.4841 |
| 1454849_x_at | Clu           | clusterin                                                                              | BB433678  | 8.1609 | 10.6451 | -2.4842 |
| 1439619_at   | Tcf12         | transcription factor 12                                                                | BG143445  | 4.1948 | 6.6801  | -2.4853 |
| 1439364_a_at | Mmp2          | matrix metalloproteinase 2                                                             | BF147716  | 9.9462 | 12.4337 | -2.4875 |
| 1431002_x_at | Fahd2a        | fumarylacetoacetate hydrolase domain containing 2A                                     | AK002291  | 4.1319 | 6.6196  | -2.4877 |
| 1451094_at   | Ggt7          | gamma-glutamyltransferase 7                                                            | BC005772  | 5.3414 | 7.8344  | -2.4930 |
| 1452287_at   | Msi1          | Musashi homolog 1(Drosophila)                                                          | BB414973  | 3.0669 | 5.5610  | -2.4941 |
| 1446294_at   | Tcf12         | transcription factor 12                                                                | AV247132  | 6.6643 | 9.1596  | -2.4953 |
| 1426573_at   | Me2           | malic enzyme 2, NAD(+)-dependent, mitochondrial                                        | BM235734  | 6.9060 | 9.4013  | -2.4954 |
| 1436325_at   | Rora          | RAR-related orphan receptor alpha                                                      | BB306272  | 2.8966 | 5.3978  | -2.5012 |
| 1455781_at   |               |                                                                                        | AU067804  | 4.7821 | 7.2842  | -2.5021 |
| 1437865_at   | Spata13       | spermatogenesis associated 13                                                          | AW546433  | 5.9357 | 8.4383  | -2.5026 |
| 1459546_s_at | Enpp1         | ectonucleotide pyrophosphatase/phosphodiesterase 1                                     | C76301    | 4.8172 | 7.3208  | -2.5036 |
| 1434439_at   | Gsk3b         | glycogen synthase kinase 3 beta                                                        | BQ175580  | 5.0830 | 7.5870  | -2.5039 |
| 1418626_a_at | Clu           | clusterin                                                                              | NM_013492 | 7.3532 | 9.8630  | -2.5098 |
| 1439787_at   | P2rx7         | purinergic receptor P2X, ligand-gated ion channel, 7                                   | BM124050  | 8.0757 | 10.5861 | -2.5104 |
| 1454699_at   | Sesn1         | sestrin 1                                                                              | BG076140  | 6.5268 | 9.0377  | -2.5108 |
| 1451019_at   | Ctsf          | cathepsin F                                                                            | AK017474  | 5.0325 | 7.5434  | -2.5109 |
| 1447521_x_at | Arhgap39      | Rho GTPase activating protein 39                                                       | AI843066  | 8.0267 | 10.5383 | -2.5115 |
| 1429144_at   | Gpcpd1        | glycerophosphocholine phosphodiesterase GDE1 homolog (S. cerevisiae)                   | AV291259  | 6.6332 | 9.1533  | -2.5201 |
| 1442075_at   | AI314604      | expressed sequence AI314604                                                            | BE991175  | 3.5262 | 6.0489  | -2.5227 |
| 1456020_at   | Sh3tc2        | SH3 domain and tetratricopeptide repeats 2                                             | BB487775  | 5.4108 | 7.9359  | -2.5251 |
| 1429417_at   | Chsy3         | chondroitin sulfate synthase 3                                                         | AK019528  | 2.5992 | 5.1247  | -2.5255 |
| 1441881_x_at | Fam101a       | family with sequence similarity 101, member A                                          | BB458543  | 6.2799 | 8.8054  | -2.5255 |
| 1429348_at   | Sema3c        | sema domain, immunoglobulin domain (Ig), short basic domain, secreted, (semaphorin) 3C | AK004119  | 6.2596 | 8.7853  | -2.5257 |
| 1442753_at   | Tnfaip8       | tumor necrosis factor, alpha-induced protein 8                                         | BF321807  | 4.5792 | 7.1055  | -2.5263 |
| 1435660_at   | LOC664787     | Sp110 nuclear body protein-like                                                        | BB548008  | 5.4594 | 7.9880  | -2.5286 |
| 1417626_at   | Pde4dip       | phosphodiesterase 4D interacting protein (myomegalin)                                  | NM_031401 | 4.4777 | 7.0079  | -2.5302 |
| 1419706_a_at | Akap12        | A kinase (PKA) anchor protein (gravin) 12                                              | NM_031185 | 5.1375 | 7.6688  | -2.5313 |
| 1448876_at   | Evc           | Ellis van Creveld gene syndrome                                                        | NM_021292 | 5.3233 | 7.8561  | -2.5329 |
| 1426524_at   | Gnpda2        | glucosamine-6-phosphate deaminase 2                                                    | AK014950  | 7.1486 | 9.6816  | -2.5330 |
| 1448652_at   | Ift88         | intraflagellar transport 88                                                            | NM_009376 | 5.5287 | 8.0618  | -2.5331 |
| 1416136_at   | Mmp2          | matrix metalloproteinase 2                                                             | NM_008610 | 9.6405 | 12.1769 | -2.5364 |
| 1417580_s_at |               |                                                                                        | NM_019414 | 4.5017 | 7.0394  | -2.5377 |
| 1455111_at   | Yip6          | Yip1 domain family, member 6                                                           | AV298249  | 7.4401 | 9.9809  | -2.5408 |
| 1425108_a_at | Smagp         | small cell adhesion glycoprotein                                                       | BC004728  | 5.6231 | 8.1660  | -2.5429 |
| 1444837_at   |               |                                                                                        | AV260557  | 3.1525 | 5.6970  | -2.5445 |
| 1451490_at   | Lyplal1       | lysophospholipase-like 1                                                               | BC027340  | 6.3800 | 8.9244  | -2.5445 |
| 1438324_at   | 9330182L06Rik | RIKEN cDNA 9330182L06 gene                                                             | AW550882  | 2.8307 | 5.3765  | -2.5458 |
| 1429146_at   | Svip          | small VCP/p97-interacting protein                                                      | BF011349  | 4.3366 | 6.8852  | -2.5486 |
| 1452639_at   | Enpp4         | ectonucleotide pyrophosphatase/phosphodiesterase 4                                     | BG920295  | 4.4467 | 6.9986  | -2.5519 |
| 1422126_a_at | Nudt13        | nudix (nucleoside diphosphate linked moiety X)-type motif 13                           | NM_026341 | 6.7064 | 9.2610  | -2.5546 |
| 1437458_x_at | Clu           | clusterin                                                                              | AV075715  | 7.8961 | 10.4524 | -2.5562 |
| 1434497_at   | 4933431E20Rik | RIKEN cDNA 4933431E20 gene                                                             | BB754142  | 4.4177 | 6.9747  | -2.5570 |
| 1424985_a_at | Sox10         | SRY-box containing gene 10                                                             | BC025171  | 6.1661 | 8.7258  | -2.5598 |
| 1429628_at   | 6330407J23Rik | RIKEN cDNA 6330407J23 gene                                                             | AK012378  | 4.0372 | 6.5981  | -2.5609 |
| 1441069_at   | Zdhhc23       | zinc finger, DHHC domain containing 23                                                 | BG069709  | 5.0675 | 7.6299  | -2.5624 |
| 1426711_at   | Tmco3         | transmembrane and coiled-coil domains 3                                                | BM114609  | 6.4090 | 8.9769  | -2.5680 |
| 1452739_at   | Fbxo7         | F-box protein 7                                                                        | AK010499  | 7.7063 | 10.2760 | -2.5697 |
| 1457038_at   | Frem2         | Fras1 related extracellular matrix protein 2                                           | BM201912  | 3.5815 | 6.1524  | -2.5709 |
| 1434379_at   | Mxd4          | Max dimerization protein 4                                                             | BG868949  | 6.1108 | 8.6826  | -2.5718 |
| 1429195_at   | Apol6         | apolipoprotein L 6                                                                     | AK010208  | 5.5405 | 8.1125  | -2.5720 |
| 1436513_at   | Tanc2         | tetratricopeptide repeat, ankyrin repeat and coiled-coil containing 2                  | BM208226  | 7.1296 | 9.7017  | -2.5722 |
| 1417673_at   | Grb14         | growth factor receptor bound protein 14                                                | NM_016719 | 3.7104 | 6.2831  | -2.5727 |

|              |           |                                                                                          |           |        |         |         |
|--------------|-----------|------------------------------------------------------------------------------------------|-----------|--------|---------|---------|
| 1444009_at   | Rassf4    | Ras association (RalGDS/AF-6) domain family member 4                                     | AV217868  | 4.8435 | 7.4168  | -2.5733 |
| 1417932_at   | Il18      | interleukin 18                                                                           | NM_008360 | 6.4917 | 9.0659  | -2.5743 |
| 1448735_at   | Cp        | ceruloplasmin                                                                            | BB332449  | 5.8627 | 8.4383  | -2.5755 |
| 1455628_at   | Epb4.1l4b | erythrocyte protein band 4.1-like 4b                                                     | BB317849  | 5.1625 | 7.7384  | -2.5759 |
| 1445539_at   | Pde7b     | phosphodiesterase 7B                                                                     | BE687857  | 3.7825 | 6.3602  | -2.5777 |
| 1425934_a_at | B4galt4   | UDP-Gal:betaGlcNAc beta 1,4-galactosyltransferase, polypeptide 4                         | AF158746  | 4.2404 | 6.8186  | -2.5782 |
| 1419477_at   | Clec2d    | C-type lectin domain family 2, member d                                                  | NM_053109 | 6.0925 | 8.6720  | -2.5795 |
| 1455431_at   | Slc5a1    | solute carrier family 5 (sodium/glucose cotransporter), member 1                         | AV371434  | 2.4513 | 5.0340  | -2.5827 |
| 1429241_at   | Nipal3    | NIPA-like domain containing 3                                                            | AK018640  | 4.1689 | 6.7535  | -2.5846 |
| 1424783_a_at |           |                                                                                          | BC019434  | 7.1500 | 9.7401  | -2.5901 |
| 1448686_at   | Il16      | interleukin 16                                                                           | BC026894  | 5.0733 | 7.6693  | -2.5960 |
| 1417946_at   | Abhd3     | abhydrolase domain containing 3                                                          | NM_134130 | 4.2333 | 6.8336  | -2.6003 |
| 1440311_at   | Sorbs1    | sorbin and SH3 domain containing 1                                                       | BB259710  | 3.4758 | 6.0777  | -2.6020 |
| 1433587_at   | Rgmb      | RGM domain family, member B                                                              | BB612707  | 5.6354 | 8.2410  | -2.6056 |
| 1449169_at   | Has2      | hyaluronan synthase 2                                                                    | NM_008216 | 8.6414 | 11.2510 | -2.6096 |
| 1419601_at   | Kcnj10    | potassium inwardly-rectifying channel, subfamily J, member 10                            | AF322631  | 5.0544 | 7.6668  | -2.6124 |
| 1429308_at   | Prdm16    | PR domain containing 16                                                                  | BF471654  | 3.6220 | 6.2384  | -2.6164 |
| 1418176_at   | Vdr       | vitamin D receptor                                                                       | AV290079  | 5.8172 | 8.4383  | -2.6210 |
| 1431213_a_at |           |                                                                                          | BG297038  | 4.9011 | 7.5226  | -2.6214 |
| 1424966_at   | Tmem40    | transmembrane protein 40                                                                 | BC019416  | 5.0709 | 7.6933  | -2.6225 |
| 1422962_a_at | Psmb8     | proteasome (prosome, macropain) subunit, beta type 8 (large multifunctional peptidase 7) | NM_010724 | 9.0238 | 11.6464 | -2.6226 |
| 1454903_at   | Ngfr      | nerve growth factor receptor (TNFR superfamily, member 16)                               | BB151515  | 7.6921 | 10.3195 | -2.6275 |
| 1417694_at   | Gab1      | growth factor receptor bound protein 2-associated protein 1                              | NM_021356 | 6.3015 | 8.9344  | -2.6329 |
| 1419200_at   | Fxyd7     | FXYD domain-containing ion transport regulator 7                                         | NM_022007 | 4.0372 | 6.6707  | -2.6335 |
| 1451224_at   | Scamp5    | secretory carrier membrane protein 5                                                     | BC018613  | 5.9930 | 8.6277  | -2.6346 |
| 1449025_at   | Ifit3     | interferon-induced protein with tetratricopeptide repeats 3                              | NM_010501 | 9.4687 | 12.1050 | -2.6363 |
| 1439882_at   | Sec23ip   | Sec23 interacting protein                                                                | BE685845  | 7.1113 | 9.7497  | -2.6383 |
| 1453514_at   | Gpm6b     | glycoprotein m6b                                                                         | AK020224  | 3.5815 | 6.2200  | -2.6385 |
| 1424567_at   | Tspan2    | tetraspanin 2                                                                            | BC007185  | 5.7035 | 8.3423  | -2.6388 |
| 1455796_x_at | Olfm1     | olfactomedin 1                                                                           | BB549310  | 5.4443 | 8.0850  | -2.6407 |
| 1434662_at   | Atg4a     | autophagy related 4A, cysteine peptidase                                                 | BM237732  | 7.4140 | 10.0587 | -2.6447 |
| 1438106_at   |           |                                                                                          | AV336932  | 2.3979 | 5.0466  | -2.6487 |
| 1431436_a_at | Katnal2   | katanin p60 subunit A-like 2                                                             | AK017114  | 5.0544 | 7.7042  | -2.6498 |
| 1418749_at   | Psd3      | pleckstrin and Sec7 domain containing 3                                                  | NM_030263 | 7.1401 | 9.7904  | -2.6503 |
| 1444086_at   | Nckap5    | NCK-associated protein 5                                                                 | BB536333  | 3.1863 | 5.8382  | -2.6519 |
| 1418941_at   | Pcdhb22   | protocadherin beta 22                                                                    | NM_053147 | 3.5264 | 6.1807  | -2.6543 |
| 1456981_at   | Tmc7      | transmembrane channel-like gene family 7                                                 | BB428982  | 4.8719 | 7.5278  | -2.6559 |
| 1450064_at   | Fmn2      | formin 2                                                                                 | BM228488  | 3.6553 | 6.3197  | -2.6644 |
| 1460623_at   | Skap2     | src family associated phosphoprotein 2                                                   | BB753881  | 7.0816 | 9.7463  | -2.6647 |
| 1457680_a_at | Tmem69    | transmembrane protein 69                                                                 | BB824992  | 5.0323 | 7.6973  | -2.6650 |
| 1435069_at   | BC064078  | cDNA sequence BC064078                                                                   | AW493518  | 5.3765 | 8.0419  | -2.6654 |
| 1449049_at   | Tlr1      | toll-like receptor 1                                                                     | AF316985  | 3.1969 | 5.8632  | -2.6663 |
| 1430543_at   | Clip3     | CAP-GLY domain containing linker protein 3                                               | AK005167  | 4.7725 | 7.4391  | -2.6666 |
| 1429549_at   | Col27a1   | collagen, type XXVII, alpha 1                                                            | BB044654  | 5.0544 | 7.7220  | -2.6676 |
| 1449682_s_at |           |                                                                                          | C79445    | 7.9416 | 10.6094 | -2.6678 |
| 1424029_at   | Tspyl4    | TSPY-like 4                                                                              | BC017540  | 6.0270 | 8.6988  | -2.6719 |
| 1429667_at   | Pou4f1    | POU domain, class 4, transcription factor 1                                              | BB465134  | 4.4162 | 7.0897  | -2.6735 |
| 1436246_at   |           |                                                                                          | AI849504  | 4.7418 | 7.4224  | -2.6806 |
| 1431648_at   | Meiob     | meiosis specific with OB domains                                                         | AK015924  | 3.4868 | 6.1678  | -2.6811 |
| 1451268_at   | Tram11    | translocation associated membrane protein 1-like 1                                       | BC027120  | 3.8756 | 6.5578  | -2.6822 |
| 1418175_at   | Vdr       | vitamin D receptor                                                                       | AV290079  | 5.3570 | 8.0419  | -2.6849 |
| 1431004_at   | Loxl2     | lysyl oxidase-like 2                                                                     | AI415741  | 4.2237 | 6.9094  | -2.6857 |
| 1440870_at   | Prdm16    | PR domain containing 16                                                                  | BB356786  | 3.6941 | 6.3802  | -2.6862 |
| 1439007_at   | Alg6      | asparagine-linked glycosylation 6 (alpha-1,3,-glucosyltransferase)                       | BB284309  | 6.9332 | 9.6199  | -2.6867 |
| 1454078_a_at | Gal3st1   | galactose-3-O-sulfotransferase 1                                                         | AK002510  | 4.9870 | 7.6739  | -2.6869 |

|              |               |                                                                                   |           |        |         |         |
|--------------|---------------|-----------------------------------------------------------------------------------|-----------|--------|---------|---------|
| 1449632_s_at | Fkbp10        | FK506 binding protein 10                                                          | AI325255  | 7.3117 | 9.9989  | -2.6871 |
| 1436212_at   | Tmem71        | transmembrane protein 71                                                          | AV173260  | 6.0267 | 8.7150  | -2.6883 |
| 1430226_at   | Xlr4c         | X-linked lymphocyte-regulated 4C                                                  | AK013623  | 4.0740 | 6.7652  | -2.6912 |
| 1423213_at   | Plxnc1        | plexin C1                                                                         | BB476707  | 3.4281 | 6.1198  | -2.6917 |
| 1427943_at   | Acyp2         | acylphosphatase 2, muscle type                                                    | BI730288  | 5.7588 | 8.4507  | -2.6919 |
| 1418105_at   | Stmn4         | stathmin-like 4                                                                   | NM_019675 | 4.7768 | 7.4693  | -2.6925 |
| 1455428_at   | Fam53b        | family with sequence similarity 53, member B                                      | BM248711  | 6.1559 | 8.8493  | -2.6934 |
| 1456841_at   | Gm4961        | kinesin superfamily protein 2C pseudogene                                         | BM228768  | 5.0050 | 7.6987  | -2.6936 |
| 1425176_at   | C1ql3         | C1q-like 3                                                                        | BB768838  | 6.9195 | 9.6145  | -2.6950 |
| 1428774_at   | Gpc6          | glypican 6                                                                        | AK020118  | 5.8297 | 8.5270  | -2.6973 |
| 1454966_at   | Itga8         | integrin alpha 8                                                                  | BQ175493  | 4.5835 | 7.2842  | -2.7007 |
| 1419292_at   | Htra3         | HtrA serine peptidase 3                                                           | NM_030127 | 6.6729 | 9.3746  | -2.7017 |
| 1460208_at   | Fbn1          | fibrillin 1                                                                       | NM_007993 | 5.0506 | 7.7560  | -2.7053 |
| 1449046_a_at | Josd2         | Josephin domain containing 2                                                      | NM_025368 | 7.3417 | 10.0488 | -2.7071 |
| 1425476_at   | Col4a5        | collagen, type IV, alpha 5                                                        | BM250666  | 9.0294 | 11.7433 | -2.7139 |
| 1421908_a_at | Tcf12         | transcription factor 12                                                           | NM_011544 | 8.5845 | 11.3010 | -2.7166 |
| 1428915_at   | Sirt5         | sirtuin 5 (silent mating type information regulation 2 homolog) 5 (S. cerevisiae) | AK002609  | 6.9835 | 9.7025  | -2.7190 |
| 1417028_a_at | Trim2         | tripartite motif-containing 2                                                     | BB283676  | 8.2552 | 10.9770 | -2.7217 |
| 1451287_s_at | Aif1l         | allograft inflammatory factor 1-like                                              | BC024599  | 5.2262 | 7.9495  | -2.7233 |
| 1437689_x_at | Clu           | clusterin                                                                         | AV152288  | 7.9431 | 10.6680 | -2.7249 |
| 1425464_at   | Gata6         | GATA binding protein 6                                                            | BM214048  | 5.0348 | 7.7607  | -2.7259 |
| 1419107_at   | Ophn1         | oligophrenin 1                                                                    | BI134110  | 4.9657 | 7.6926  | -2.7269 |
| 1418451_at   | Gng2          | guanine nucleotide binding protein (G protein), gamma 2                           | BB522409  | 5.3231 | 8.0510  | -2.7278 |
| 1448700_at   | G0s2          | G0/G1 switch gene 2                                                               | NM_008059 | 4.8933 | 7.6211  | -2.7278 |
| 1450322_s_at |               |                                                                                   | NM_011409 | 4.0295 | 6.7577  | -2.7281 |
| 1457319_at   | A130038J17Rik | RIKEN cDNA A130038J17 gene                                                        | BB216233  | 4.0262 | 6.7577  | -2.7315 |
| 1455216_at   | Paqr6         | progesterin and adipoQ receptor family member VI                                  | BI408433  | 5.7781 | 8.5113  | -2.7332 |
| 1452980_at   | 2810468N07Rik | RIKEN cDNA 2810468N07 gene                                                        | AK013390  | 3.9742 | 6.7079  | -2.7337 |
| 1451620_at   | C1ql3         | C1q-like 3                                                                        | BB768838  | 7.4774 | 10.2125 | -2.7351 |
| 1434445_at   | Arhgap39      | Rho GTPase activating protein 39                                                  | BB403657  | 5.3062 | 8.0419  | -2.7357 |
| 1438027_at   |               |                                                                                   | BB668084  | 5.9806 | 8.7184  | -2.7378 |
| 1457869_at   | Gm10451       | predicted gene 10451                                                              | BB745211  | 3.9024 | 6.6421  | -2.7396 |
| 1431834_a_at | Emilin1       | elastin microfibril interfacier 1                                                 | AK020015  | 5.7265 | 8.4712  | -2.7446 |
| 1440470_at   | Lrrc14        | leucine rich repeat containing 14                                                 | AA103376  | 4.4196 | 7.1675  | -2.7479 |
| 1422781_at   | Tlr3          | toll-like receptor 3                                                              | NM_126166 | 4.3524 | 7.1072  | -2.7548 |
| 1449531_at   | Leprel2       | leprecan-like 2                                                                   | BC003726  | 5.3725 | 8.1321  | -2.7596 |
| 1454728_s_at | Atp8a1        | ATPase, aminophospholipid transporter (APLT), class I, type 8A, member 1          | AW610650  | 5.2439 | 8.0049  | -2.7610 |
| 1436663_at   | AI846148      | expressed sequence AI846148                                                       | BB521470  | 5.0107 | 7.7740  | -2.7633 |
| 1455059_at   | Helz          | helicase with zinc finger domain                                                  | BB104941  | 4.0639 | 6.8273  | -2.7634 |
| 1417781_at   | Lass4         | LAG1 homolog, ceramide synthase 4                                                 | BB006809  | 4.6127 | 7.3768  | -2.7641 |
| 1441579_at   | Dmrt1         | doublesex and mab-3 related transcription factor like family A1                   | BB461344  | 3.3040 | 6.0693  | -2.7654 |
| 1429830_a_at | Cd59a         | CD59a antigen                                                                     | AK005507  | 5.0970 | 7.8634  | -2.7665 |
| 1452404_at   | Phactr2       | phosphatase and actin regulator 2                                                 | BB321846  | 3.3730 | 6.1404  | -2.7674 |
| 1460696_at   | BC026585      | cDNA sequence BC026585                                                            | BC026585  | 5.5727 | 8.3413  | -2.7686 |
| 1460693_a_at | Col9a3        | collagen, type IX, alpha 3                                                        | BG074456  | 5.0107 | 7.7805  | -2.7698 |
| 1426523_a_at | Gnpda2        | glucosamine-6-phosphate deaminase 2                                               | AK014950  | 6.4242 | 9.1944  | -2.7703 |
| 1449953_at   | Itgb3bp       | integrin beta 3 binding protein (beta3-endonexin)                                 | NM_026348 | 3.9701 | 6.7515  | -2.7814 |
| 1459860_x_at | Trim2         | tripartite motif-containing 2                                                     | BB466780  | 8.3941 | 11.1784 | -2.7843 |
| 1454733_at   | Nod1          | nucleotide-binding oligomerization domain containing 1                            | BB138330  | 5.9844 | 8.7700  | -2.7856 |
| 1453093_at   | Rasgef1c      | RasGEF domain family, member 1C                                                   | AK018593  | 5.5578 | 8.3497  | -2.7919 |
| 1450699_at   | Selenbp1      | selenium binding protein 1                                                        | NM_009150 | 4.3909 | 7.1860  | -2.7951 |
| 1455494_at   | Col1a1        | collagen, type I, alpha 1                                                         | BI794771  | 4.4891 | 7.2873  | -2.7982 |
| 1421695_at   | Strc          | stereocilin                                                                       | NM_080459 | 5.4318 | 8.2362  | -2.8044 |
| 1427301_at   | Cd48          | CD48 antigen                                                                      | BE634960  | 3.1554 | 5.9599  | -2.8046 |
| 1437417_s_at | Gpc6          | glypican 6                                                                        | BB493031  | 3.8187 | 6.6253  | -2.8065 |
| 1439526_at   |               |                                                                                   | AV375160  | 5.2602 | 8.0672  | -2.8070 |
| 1436702_at   | Nat8l         | N-acetyltransferase 8-like                                                        | BE989731  | 5.3986 | 8.2072  | -2.8086 |
| 1449297_at   | Casp12        | caspase 12                                                                        | NM_009808 | 6.1458 | 8.9548  | -2.8090 |
| 1434277_a_at | Ypel2         | yippee-like 2 (Drosophila)                                                        | BG069663  | 7.4864 | 10.2957 | -2.8093 |

|              |               |                                                                             |           |        |         |         |
|--------------|---------------|-----------------------------------------------------------------------------|-----------|--------|---------|---------|
| 1442947_x_at |               |                                                                             | BG069857  | 5.0584 | 7.8689  | -2.8105 |
| 1424379_at   | Car11         | carbonic anhydrase 11                                                       | BC019393  | 4.7794 | 7.5915  | -2.8121 |
| 1418690_at   | Ptprz1        | protein tyrosine phosphatase, receptor type Z, polypeptide 1                | NM_011219 | 2.7153 | 5.5301  | -2.8148 |
| 1426947_x_at | Col6a2        | collagen, type VI, alpha 2                                                  | BI455189  | 5.6454 | 8.4629  | -2.8175 |
| 1456111_at   | Nxpe4         | neurexophilin and PC-esterase domain family, member 4                       | BB072624  | 3.8079 | 6.6275  | -2.8196 |
| 1441305_at   | Nedd4l        | neural precursor cell expressed, developmentally down-regulated gene 4-like | BB360028  | 3.3086 | 6.1404  | -2.8318 |
| 1435359_at   | Mtss1l        | metastasis suppressor 1-like                                                | BB154954  | 5.5488 | 8.3860  | -2.8372 |
| 1427354_at   | Hoxa4         | homeobox A4                                                                 | AV135424  | 3.4989 | 6.3376  | -2.8387 |
| 1423578_at   | Col11a2       | collagen, type XI, alpha 2                                                  | AV242706  | 4.2978 | 7.1405  | -2.8427 |
| 1438325_at   | Mecom         | MDS1 and EVI1 complex locus                                                 | AI647591  | 4.0467 | 6.8973  | -2.8507 |
| 1442130_at   | Hsh2d         | hematopoietic SH2 domain containing                                         | BG091940  | 3.5815 | 6.4341  | -2.8527 |
| 1424034_at   | Rora          | RAR-related orphan receptor alpha                                           | BI660199  | 4.2537 | 7.1072  | -2.8535 |
| 1429246_a_at | Anxa6         | annexin A6                                                                  | AK013026  | 4.7207 | 7.5747  | -2.8540 |
| 1427996_at   | BC028528      | cDNA sequence BC028528                                                      | BC028528  | 4.5672 | 7.4224  | -2.8552 |
| 1451288_s_at | 1810043G02Rik | RIKEN cDNA 1810043G02 gene                                                  | BC010330  | 5.9110 | 8.7676  | -2.8566 |
| 1419703_at   | Col5a3        | collagen, type V, alpha 3                                                   | NM_016919 | 7.0748 | 9.9345  | -2.8597 |
| 1453191_at   | Col27a1       | collagen, type XXVII, alpha 1                                               | BB044654  | 5.6495 | 8.5095  | -2.8601 |
| 1453855_at   | Mxra7         | matrix-remodelling associated 7                                             | BG295762  | 5.9357 | 8.8070  | -2.8713 |
| 1424841_s_at | Rbks          | ribokinase                                                                  | BC023339  | 5.2504 | 8.1217  | -2.8713 |
| 1452711_at   | Atl1          | atlastin GTPase 1                                                           | BE948928  | 4.1014 | 6.9758  | -2.8745 |
| 1423672_at   | Ttc30b        | tetratricopeptide repeat domain 30B                                         | BC026507  | 4.9204 | 7.8022  | -2.8818 |
| 1428333_at   | Arxes2        | adipocyte-related X-chromosome expressed sequence 2                         | AK013740  | 5.5091 | 8.3948  | -2.8857 |
| 1437935_at   | Mei4          | meiosis-specific, MEI4 homolog (S. cerevisiae)                              | BB821151  | 3.2538 | 6.1404  | -2.8866 |
| 1422597_at   | Mmp15         | matrix metalloproteinase 15                                                 | NM_008609 | 5.4508 | 8.3378  | -2.8870 |
| 1455028_at   | Mapt          | microtubule-associated protein tau                                          | BQ178510  | 4.2977 | 7.1853  | -2.8876 |
| 1434069_at   | Prex1         | phosphatidylinositol-3,4,5-trisphosphate-dependent Rac exchange factor 1    | BB794978  | 5.0259 | 7.9141  | -2.8882 |
| 1421028_a_at | Mef2c         | myocyte enhancer factor 2C                                                  | AI595932  | 5.1317 | 8.0217  | -2.8900 |
| 1449477_s_at | Slc2a10       | solute carrier family 2 (facilitated glucose transporter), member 10        | NM_130451 | 3.7878 | 6.6801  | -2.8922 |
| 1436845_at   | Axin2         | axin2                                                                       | BB398993  | 5.1690 | 8.0613  | -2.8924 |
| 1422072_a_at | Gstm6         | glutathione S-transferase, mu 6                                             | NM_008184 | 4.6127 | 7.5068  | -2.8941 |
| 1423233_at   | Cebpd         | CCAAT/enhancer binding protein (C/EBP), delta                               | BB831146  | 7.1280 | 10.0237 | -2.8957 |
| 1439909_at   | Zfp521        | zinc finger protein 521                                                     | BE133660  | 5.4771 | 8.3745  | -2.8974 |
| 1421112_at   | Nkx2-2        | NK2 transcription factor related, locus 2 (Drosophila)                      | NM_010919 | 4.0878 | 6.9873  | -2.8994 |
| 1450429_at   | Capn6         | calpain 6                                                                   | AI747133  | 4.9157 | 7.8151  | -2.8995 |
| 1433990_at   | Lhfp13        | lipoma HMGIC fusion partner-like 3                                          | BQ175687  | 4.2088 | 7.1176  | -2.9088 |
| 1425078_x_at | C130026I21Rik | RIKEN cDNA C130026I21 gene                                                  | BC007193  | 2.9785 | 5.8877  | -2.9092 |
| 1437983_at   | Sall1         | sal-like 1 (Drosophila)                                                     | BB739342  | 4.0343 | 6.9450  | -2.9107 |
| 1456480_at   | Fry           | furry homolog (Drosophila)                                                  | BB527078  | 3.2416 | 6.1530  | -2.9115 |
| 1434467_at   | Atcay         | ataxia, cerebellar, Cayman type homolog (human)                             | BQ042885  | 3.9637 | 6.8770  | -2.9133 |
| 1430896_s_at | Nudt7         | nudix (nucleoside diphosphate linked moiety X)-type motif 7                 | AK008824  | 4.4728 | 7.3912  | -2.9185 |
| 1444466_at   | Ncald         | neurocalcin delta                                                           | BB433324  | 4.3541 | 7.2750  | -2.9208 |
| 1452823_at   | Gstk1         | glutathione S-transferase kappa 1                                           | AK002661  | 6.5838 | 9.5047  | -2.9210 |
| 1456343_at   | Slc35f1       | solute carrier family 35, member F1                                         | BB540579  | 3.8134 | 6.7353  | -2.9219 |
| 1418753_at   | Gfpt2         | glutamine fructose-6-phosphate transaminase 2                               | NM_013529 | 5.2685 | 8.1925  | -2.9240 |
| 1439247_at   | Dock10        | dedicator of cytokinesis 10                                                 | BB763030  | 3.0872 | 6.0124  | -2.9252 |
| 1430681_at   | Cryl1         | crystallin, lambda 1                                                        | AI482548  | 5.4452 | 8.3716  | -2.9264 |
| 1424692_at   | 2810055F11Rik | RIKEN cDNA 2810055F11 gene                                                  | BC004753  | 5.0970 | 8.0239  | -2.9270 |
| 1427100_at   | Metrn         | meteorin, glial cell differentiation regulator                              | BE947704  | 9.4098 | 12.3382 | -2.9284 |
| 1455717_s_at | Daam2         | dishevelled associated activator of morphogenesis 2                         | BM206030  | 3.9024 | 6.8313  | -2.9289 |
| 1457664_x_at | C2            | complement component 2 (within H-2S)                                        | AV227574  | 5.0683 | 7.9993  | -2.9310 |
| 1456053_at   |               |                                                                             | AV350923  | 3.3762 | 6.3105  | -2.9343 |
| 1417027_at   | Trim2         | tripartite motif-containing 2                                               | BB283676  | 7.8881 | 10.8254 | -2.9372 |
| 1449271_a_at | Hebp2         | heme binding protein 2                                                      | NM_019487 | 6.8952 | 9.8422  | -2.9470 |
| 1454901_at   | Ypel2         | yippee-like 2 (Drosophila)                                                  | BG069663  | 6.7797 | 9.7271  | -2.9474 |

|              |               |                                                                                          |           |         |         |         |
|--------------|---------------|------------------------------------------------------------------------------------------|-----------|---------|---------|---------|
| 1453571_at   | Deptor        | DEP domain containing MTOR-interacting protein                                           | BB324973  | 7.1398  | 10.0941 | -2.9543 |
| 1430316_at   | Ispd          | isoprenoid synthase domain containing                                                    | BB454777  | 4.0074  | 6.9643  | -2.9570 |
| 1416654_at   | Slc31a2       | solute carrier family 31, member 2                                                       | NM_025286 | 6.5834  | 9.5416  | -2.9583 |
| 1426018_a_at | Sox6          | SRY-box containing gene 6                                                                | D61689    | 4.2459  | 7.2050  | -2.9591 |
| 1426280_at   | Wdpcp         | WD repeat containing planar cell polarity                                                | AF424701  | 4.9529  | 7.9141  | -2.9612 |
| 1426315_a_at | 6330416G13Rik | RIKEN cDNA 6330416G13 gene                                                               | AV326978  | 5.0379  | 7.9993  | -2.9614 |
| 1444769_at   | Tex9          | testis expressed gene 9                                                                  | BB428851  | 3.0333  | 5.9951  | -2.9618 |
| 1442371_at   | Lmbr1         | limb region 1                                                                            | BM898643  | 4.2333  | 7.1952  | -2.9619 |
| 1435678_at   | 2610017109Rik | RIKEN cDNA 2610017109 gene                                                               | AW045679  | 4.6127  | 7.5765  | -2.9637 |
| 1450696_at   | Psmb9         | proteasome (prosome, macropain) subunit, beta type 9 (large multifunctional peptidase 2) | NM_013585 | 7.3508  | 10.3278 | -2.9770 |
| 1426260_a_at |               |                                                                                          | D87867    | 7.7757  | 10.7562 | -2.9805 |
| 1425784_a_at | Olfm1         | olfactomedin 1                                                                           | D78264    | 6.8564  | 9.8380  | -2.9815 |
| 1434378_a_at | Mxd4          | Max dimerization protein 4                                                               | BG868949  | 7.5015  | 10.4842 | -2.9827 |
| 1435336_at   | Celsr2        | cadherin, EGF LAG seven-pass G-type receptor 2 (flamingo homolog, Drosophila)            | AW553336  | 4.3588  | 7.3417  | -2.9830 |
| 1433438_x_at | Mela          | melanoma antigen                                                                         | BB794642  | 7.3757  | 10.3646 | -2.9889 |
| 1455177_at   | Ahi1          | Abelson helper integration site 1                                                        | BQ175532  | 5.2958  | 8.2894  | -2.9937 |
| 1455892_x_at |               |                                                                                          | BB794742  | 10.2359 | 13.2298 | -2.9939 |
| 1448249_at   | Gpd1          | glycerol-3-phosphate dehydrogenase 1 (soluble)                                           | BC019391  | 6.0831  | 9.0809  | -2.9978 |
| 1438142_s_at | Cdhr4         | cadherin-related family member 4                                                         | C87564    | 4.7883  | 7.7871  | -2.9988 |
| 1431335_a_at | Wfdc1         | WAP four-disulfide core domain 1                                                         | AK018575  | 6.1556  | 9.1553  | -2.9998 |
| 1454656_at   | Spata13       | spermatogenesis associated 13                                                            | AV271736  | 7.6171  | 10.6184 | -3.0013 |
| 1420665_at   | Itgb3bp       | integrin beta 3 binding protein (beta3-endonexin)                                        | NM_026348 | 4.1664  | 7.1687  | -3.0023 |
| 1436355_at   | Fads6         | fatty acid desaturase domain family, member 6                                            | BE136429  | 4.2783  | 7.2814  | -3.0032 |
| 1449591_at   | Casp4         | caspase 4, apoptosis-related cysteine peptidase                                          | NM_007609 | 5.8632  | 8.8720  | -3.0089 |
| 1444564_at   | Apod          | apolipoprotein D                                                                         | AV332635  | 4.6526  | 7.6668  | -3.0142 |
| 1430079_at   | 5033406O09Rik | RIKEN cDNA 5033406O09 gene                                                               | AK020272  | 3.7420  | 6.7577  | -3.0157 |
| 1434580_at   | Enpp4         | ectonucleotide pyrophosphatase/phosphodiesterase 4                                       | AV280361  | 6.1561  | 9.1771  | -3.0210 |
| 1435892_at   | Asxl3         | additional sex combs like 3 (Drosophila)                                                 | BB762904  | 4.2333  | 7.2562  | -3.0229 |
| 1455610_at   | Synm          | synemin, intermediate filament protein                                                   | BB457010  | 4.5745  | 7.5990  | -3.0245 |
| 1427101_at   | Metrn         | meteorin, glial cell differentiation regulator                                           | BE947704  | 4.5107  | 7.5390  | -3.0282 |
| 1434201_at   | Chrdl1        | chordin-like 1                                                                           | AV144145  | 2.7218  | 5.7515  | -3.0297 |
| 1448551_a_at | Trim2         | tripartite motif-containing 2                                                            | BB283676  | 6.4735  | 9.5035  | -3.0301 |
| 1442095_at   | Asxl3         | additional sex combs like 3 (Drosophila)                                                 | BB528113  | 4.4921  | 7.5226  | -3.0305 |
| 1425597_a_at | Qk            | quaking                                                                                  | AW060288  | 3.4539  | 6.4845  | -3.0306 |
| 1427798_x_at |               |                                                                                          | BF580235  | 4.9067  | 7.9398  | -3.0332 |
| 1430520_at   | Cpne8         | copine VIII                                                                              | AW548480  | 5.3311  | 8.3672  | -3.0362 |
| 1425500_x_at |               |                                                                                          | BC003207  | 5.2784  | 8.3151  | -3.0367 |
| 1424840_at   | Rbks          | ribokinase                                                                               | BC023339  | 4.6597  | 7.7007  | -3.0411 |
| 1419407_at   | Hc            | hemolytic complement                                                                     | NM_010406 | 3.9701  | 7.0173  | -3.0472 |
| 1456328_at   | Bank1         | B cell scaffold protein with ankyrin repeats 1                                           | AI451642  | 4.4579  | 7.5068  | -3.0489 |
| 1429088_at   | Lbh           | limb-bud and heart                                                                       | AK007400  | 6.0966  | 9.1477  | -3.0511 |
| 1435510_at   | Ppm1h         | protein phosphatase 1H (PP2C domain containing)                                          | BB283101  | 5.2880  | 8.3423  | -3.0543 |
| 1425475_at   | Col4a5        | collagen, type IV, alpha 5                                                               | BM250666  | 7.5935  | 10.6494 | -3.0559 |
| 1425603_at   | Tmem176a      | transmembrane protein 176A                                                               | BC006049  | 5.3840  | 8.4406  | -3.0566 |
| 1435417_at   | AI464131      | expressed sequence AI464131                                                              | BG063189  | 4.5707  | 7.6381  | -3.0675 |
| 1425869_a_at | Psen2         | presenilin 2                                                                             | BC010403  | 5.7155  | 8.7908  | -3.0752 |
| 1439260_a_at | Enpp3         | ectonucleotide pyrophosphatase/phosphodiesterase 3                                       | BB039510  | 3.3106  | 6.3891  | -3.0785 |
| 1426990_at   | Cubn          | cubilin (intrinsic factor-cobalamin receptor)                                            | AF197159  | 3.7762  | 6.8564  | -3.0802 |
| 1438676_at   | Gbp6          | guanylate binding protein 6                                                              | BM241485  | 6.1234  | 9.2067  | -3.0833 |
| 1417701_at   | Ppp1r14c      | protein phosphatase 1, regulatory (inhibitor) subunit 14c                                | NM_133485 | 6.4409  | 9.5298  | -3.0890 |
| 1448449_at   | Ripk3         | receptor-interacting serine-threonine kinase 3                                           | NM_019955 | 5.1723  | 8.2662  | -3.0939 |
| 1455266_at   | Kif5c         | kinesin family member 5C                                                                 | BB698320  | 5.4122  | 8.5073  | -3.0951 |
| 1448590_at   | Col6a1        | collagen, type VI, alpha 1                                                               | NM_009933 | 8.2709  | 11.3703 | -3.0994 |
| 1428541_at   | Fam115a       | family with sequence similarity 115, member A                                            | BE944524  | 3.0796  | 6.1807  | -3.1011 |
| 1432517_a_at | Nnmt          | nicotinamide N-methyltransferase                                                         | AK006371  | 5.0544  | 8.1559  | -3.1014 |
| 1459847_x_at | Gfra2         | glial cell line derived neurotrophic factor family receptor alpha 2                      | AV354240  | 5.2131  | 8.3146  | -3.1015 |



|              |               |                                                                           |           |        |         |         |
|--------------|---------------|---------------------------------------------------------------------------|-----------|--------|---------|---------|
| 1429025_a_at | Hexim2        | hexamethylene bis-acetamide inducible 2                                   | BB771130  | 4.6674 | 7.7805  | -3.1131 |
| 1448943_at   | Nrp1          | neuropilin 1                                                              | AK011144  | 8.0878 | 11.2031 | -3.1152 |
| 1429026_at   | Hexim2        | hexamethylene bis-acetamide inducible 2                                   | BB771130  | 6.1041 | 9.2211  | -3.1170 |
| 1417741_at   | Pygl          | liver glycogen phosphorylase                                              | NM_133198 | 3.1525 | 6.2707  | -3.1182 |
| 1455164_at   | Arhgap31      | Rho GTPase activating protein 31                                          | AV308092  | 6.2111 | 9.3299  | -3.1188 |
| 1433855_at   | Abat          | 4-aminobutyrate aminotransferase                                          | BF462185  | 4.2099 | 7.3328  | -3.1229 |
| 1434889_at   | Plekha7       | pleckstrin homology domain containing, family A member 7                  | BI905111  | 4.6148 | 7.7384  | -3.1235 |
| 1427883_a_at | Col3a1        | collagen, type III, alpha 1                                               | AW550625  | 9.9842 | 13.1080 | -3.1237 |
| 1448944_at   | Nrp1          | neuropilin 1                                                              | AK011144  | 6.7797 | 9.9074  | -3.1277 |
| 1444260_at   |               |                                                                           | BF661746  | 3.1259 | 6.2582  | -3.1323 |
| 1435272_at   | Itpkb         | inositol 1,4,5-trisphosphate 3-kinase B                                   | BE196957  | 4.2356 | 7.3681  | -3.1326 |
| 1431326_a_at | Tmod2         | tropomodulin 2                                                            | AK017072  | 4.7446 | 7.8806  | -3.1360 |
| 1439713_at   | Itga1         | integrin alpha 1                                                          | AV372589  | 5.1786 | 8.3160  | -3.1375 |
| 1426712_at   | Slc6a15       | solute carrier family 6 (neurotransmitter transporter), member 15         | BB129409  | 5.2868 | 8.4300  | -3.1432 |
| 1419820_at   | Pkhd1         | polycystic kidney and hepatic disease 1                                   | AI182499  | 2.8350 | 5.9820  | -3.1471 |
| 1425175_at   | C1ql3         | C1q-like 3                                                                | BB768838  | 6.2760 | 9.4253  | -3.1493 |
| 1420362_a_at | Bik           | BCL2-interacting killer                                                   | NM_007546 | 3.3504 | 6.5005  | -3.1501 |
| 1457701_at   | Tmem136       | transmembrane protein 136                                                 | BB457336  | 3.5193 | 6.6707  | -3.1513 |
| 1428622_at   |               |                                                                           | AK014624  | 6.9937 | 10.1479 | -3.1542 |
| 1419523_at   | Cyp3a13       | cytochrome P450, family 3, subfamily a, polypeptide 13                    | NM_007819 | 3.5815 | 6.7443  | -3.1628 |
| 1419551_s_at | Stk39         | serine/threonine kinase 39                                                | BG919998  | 5.5221 | 8.6861  | -3.1639 |
| 1459720_x_at |               |                                                                           | BB796715  | 5.0030 | 8.1710  | -3.1680 |
| 1443589_at   | DXErd242e     | DNA segment, Chr X, ERATO Doi 242, expressed                              | C79245    | 3.2170 | 6.3902  | -3.1732 |
| 1418084_at   | Nrp1          | neuropilin 1                                                              | AK011144  | 7.1687 | 10.3419 | -3.1733 |
| 1417307_at   | Dmd           | dystrophin, muscular dystrophy                                            | NM_007868 | 4.5681 | 7.7424  | -3.1743 |
| 1456665_at   | Eya4          | eyes absent 4 homolog (Drosophila)                                        | BB476944  | 3.9919 | 7.1687  | -3.1767 |
| 1455299_at   | Vgll3         | vestigial like 3 (Drosophila)                                             | BB011882  | 5.4108 | 8.5907  | -3.1799 |
| 1426399_at   | Vwa1          | von Willebrand factor A domain containing 1                               | BB183736  | 5.2164 | 8.3978  | -3.1814 |
| 1428808_at   | Prickle2      | prickle homolog 2 (Drosophila)                                            | BQ177191  | 4.3493 | 7.5356  | -3.1863 |
| 1425560_a_at | S100a16       | S100 calcium binding protein A16                                          | BC020031  | 6.6681 | 9.8547  | -3.1866 |
| 1450988_at   |               |                                                                           | BB751088  | 4.6182 | 7.8087  | -3.1905 |
| 1418374_at   | Fxyd3         | FXFD domain-containing ion transport regulator 3                          | NM_008557 | 4.6590 | 7.8510  | -3.1920 |
| 1448765_at   | Fyn           | Fyn proto-oncogene                                                        | NM_008054 | 6.3703 | 9.5639  | -3.1936 |
| 1450315_at   | Vmn1r148      | vomeroneural 1 receptor 148                                               | NM_030736 | 5.5630 | 8.7595  | -3.1965 |
| 1448382_at   | Ehhadh        | enoyl-Coenzyme A, hydratase/3-hydroxyacyl Coenzyme A dehydrogenase        | NM_023737 | 3.3103 | 6.5131  | -3.2028 |
| 1417793_at   | Irgm2         | immunity-related GTPase family M member 2                                 | NM_019440 | 7.4935 | 10.6980 | -3.2045 |
| 1429394_at   | A130010J15Rik | RIKEN cDNA A130010J15 gene                                                | BB025778  | 5.3301 | 8.5348  | -3.2046 |
| 1417051_at   | Pcdh8         | protocadherin 8                                                           | NM_021543 | 2.6565 | 5.8641  | -3.2076 |
| 1419124_at   | Mfsd6         | major facilitator superfamily domain containing 6                         | NM_133829 | 3.3762 | 6.5881  | -3.2119 |
| 1440370_at   | Abca13        | ATP-binding cassette, sub-family A (ABC1), member 13                      | BB277120  | 3.5809 | 6.7933  | -3.2124 |
| 1460255_at   | Tnfsf13b      | tumor necrosis factor (ligand) superfamily, member 13b                    | NM_033622 | 4.0913 | 7.3049  | -3.2136 |
| 1417185_at   | Ly6a          | lymphocyte antigen 6 complex, locus A                                     | BC002070  | 9.7058 | 12.9198 | -3.2140 |
| 1422159_at   | Ppef2         | protein phosphatase, EF hand calcium-binding domain 2                     | BC027049  | 4.8132 | 8.0309  | -3.2177 |
| 1418712_at   | Cdc42ep5      | CDC42 effector protein (Rho GTPase binding) 5                             | NM_021454 | 6.0446 | 9.2657  | -3.2211 |
| 1430353_at   | Glis3         | GLIS family zinc finger 3                                                 | BB207363  | 6.2007 | 9.4253  | -3.2246 |
| 1419658_at   |               |                                                                           | NM_010398 | 3.9701 | 7.1952  | -3.2251 |
| 1447676_x_at | S100a16       | S100 calcium binding protein A16                                          | AV074236  | 6.3729 | 9.5984  | -3.2256 |
| 1443579_s_at |               |                                                                           | AI957118  | 6.1696 | 9.4056  | -3.2360 |
| 1434960_at   | Taf9b         | TAF9B RNA polymerase II, TATA box binding protein (TBP)-associated factor | AW555571  | 2.8674 | 6.1064  | -3.2390 |
| 1437756_at   | Gimap9        | GTPase, IMAP family member 9                                              | BF682515  | 3.5179 | 6.7577  | -3.2398 |
| 1455106_a_at | Ckb           | creatine kinase, brain                                                    | BG967663  | 9.3254 | 12.5693 | -3.2439 |
| 1451626_x_at |               |                                                                           | U58494    | 7.8371 | 11.0818 | -3.2447 |
| 1424808_at   | Lama4         | laminin, alpha 4                                                          | BB053010  | 3.4107 | 6.6564  | -3.2457 |
| 1443983_at   |               |                                                                           | BB218653  | 4.1049 | 7.3594  | -3.2544 |
| 1449033_at   | Tnfrsf11b     | tumor necrosis factor receptor superfamily, member 11b (osteoprotegerin)  | AB013898  | 2.5992 | 5.8632  | -3.2640 |

|              |               |                                                                                        |           |        |         |         |
|--------------|---------------|----------------------------------------------------------------------------------------|-----------|--------|---------|---------|
| 1450063_at   | Fmn2          | formin 2                                                                               | BM228488  | 4.0060 | 7.2842  | -3.2782 |
| 1434466_at   | Atcay         | ataxia, cerebellar, Cayman type homolog (human)                                        | BQ042885  | 3.4098 | 6.6941  | -3.2842 |
| 1427433_s_at | Hoxa3         | homeobox A3                                                                            | BB496114  | 4.0569 | 7.3417  | -3.2848 |
| 1452452_at   |               |                                                                                        | M73818    | 6.3826 | 9.6734  | -3.2908 |
| 1434186_at   | Lpar4         | lysophosphatidic acid receptor 4                                                       | BB297502  | 6.6216 | 9.9132  | -3.2916 |
| 1421943_at   | Tgfa          | transforming growth factor alpha                                                       | M92420    | 7.1387 | 10.4315 | -3.2929 |
| 1424464_s_at | Mfsd6         | major facilitator superfamily domain containing 6                                      | BF225441  | 4.6051 | 7.9021  | -3.2970 |
| 1423510_at   | lapp          | islet amyloid polypeptide                                                              | BM569571  | 3.8660 | 7.1687  | -3.3027 |
| 1456591_x_at | Akap3         | A kinase (PRKA) anchor protein 3                                                       | AV255496  | 3.3245 | 6.6275  | -3.3030 |
| 1423420_at   | Adrb1         | adrenergic receptor, beta 1                                                            | AK018378  | 3.5280 | 6.8313  | -3.3033 |
| 1416211_a_at | Ptn           | pleiotrophin                                                                           | BC002064  | 6.1586 | 9.4627  | -3.3041 |
| 1440527_at   |               |                                                                                        | BI440542  | 4.7432 | 8.0510  | -3.3078 |
| 1438455_at   | Pabpc4l       | poly(A) binding protein, cytoplasmic 4-like                                            | AI464220  | 2.6481 | 5.9590  | -3.3109 |
| 1419045_at   | Slc25a23      | solute carrier family 25 (mitochondrial carrier; phosphate carrier), member 23         | NM_025877 | 4.6079 | 7.9241  | -3.3162 |
| 1429668_at   | Pou4f1        | POU domain, class 4, transcription factor 1                                            | BB465134  | 2.6405 | 5.9590  | -3.3186 |
| 1439251_at   | Idua          | iduronidase, alpha-L-                                                                  | BI133445  | 6.0929 | 9.4134  | -3.3205 |
| 1455251_at   | Itga1         | integrin alpha 1                                                                       | AV071536  | 6.3805 | 9.7048  | -3.3243 |
| 1455833_at   | Afap1l2       | actin filament associated protein 1-like 2                                             | BG068103  | 5.7129 | 9.0377  | -3.3248 |
| 1451629_at   | Lbh           | limb-bud and heart                                                                     | BC026827  | 8.4525 | 11.7773 | -3.3249 |
| 1423895_a_at | Celf2         | CUGBP, Elav-like family member 2                                                       | BB644164  | 6.1084 | 9.4378  | -3.3294 |
| 1456097_a_at | Itgb3bp       | integrin beta 3 binding protein (beta3-endonexin)                                      | BB830191  | 6.5190 | 9.8484  | -3.3295 |
| 1436173_at   | Dlc1          | deleted in liver cancer 1                                                              | BB768194  | 5.7003 | 9.0303  | -3.3300 |
| 1441953_at   | Stox2         | storkhead box 2                                                                        | BB003572  | 4.7284 | 8.0672  | -3.3388 |
| 1440684_at   | Lpcat2        | lysophosphatidylcholine acyltransferase 2                                              | BB187472  | 4.5856 | 7.9287  | -3.3431 |
| 1416710_at   | Tmem35        | transmembrane protein 35                                                               | NM_026239 | 3.4443 | 6.7928  | -3.3485 |
| 1439831_at   |               |                                                                                        | AW111920  | 5.2861 | 8.6386  | -3.3525 |
| 1420565_at   | Hoxa1         | homeobox A1                                                                            | NM_010449 | 4.3885 | 7.7464  | -3.3579 |
| 1438020_at   | Hapln1        | hyaluronan and proteoglycan link protein 1                                             | BB036951  | 2.5992 | 5.9620  | -3.3628 |
| 1417168_a_at | Usp2          | ubiquitin specific peptidase 2                                                         | AI553394  | 4.5972 | 7.9631  | -3.3660 |
| 1453211_at   | Ccdc89        | coiled-coil domain containing 89                                                       | BB470050  | 2.5242 | 5.8947  | -3.3705 |
| 1434150_a_at |               |                                                                                        | AV171622  | 3.7364 | 7.1072  | -3.3708 |
| 1426261_s_at |               |                                                                                        | D87867    | 5.9335 | 9.3048  | -3.3713 |
| 1448831_at   | Angpt2        | angiopoietin 2                                                                         | NM_007426 | 6.1112 | 9.4896  | -3.3784 |
| 1429265_a_at | Rnf130        | ring finger protein 130                                                                | AK011088  | 7.3898 | 10.7747 | -3.3849 |
| 1422510_at   | Ctdspl        | CTD (carboxy-terminal domain, RNA polymerase II, polypeptide A) small phosphatase-like | NM_133710 | 5.4891 | 8.8760  | -3.3869 |
| 1419042_at   | Iigp1         | interferon inducible GTPase 1                                                          | BM239828  | 6.1370 | 9.5298  | -3.3928 |
| 1460602_at   | Dlc1          | deleted in liver cancer 1                                                              | BB768194  | 6.1969 | 9.6003  | -3.4034 |
| 1434729_at   | Zc4h2         | zinc finger, C4H2 domain containing                                                    | BM120178  | 4.8229 | 8.2266  | -3.4037 |
| 1448083_at   | Nalcn         | sodium leak channel, non-selective                                                     | BE861826  | 3.7307 | 7.1383  | -3.4076 |
| 1435022_at   | Alx1          | ALX homeobox 1                                                                         | BB366930  | 3.6055 | 7.0173  | -3.4117 |
| 1433509_s_at | Reep1         | receptor accessory protein 1                                                           | BQ174328  | 3.8971 | 7.3117  | -3.4146 |
| 1452424_at   | Lpar4         | lysophosphatidic acid receptor 4                                                       | AW493905  | 4.4791 | 7.8961  | -3.4170 |
| 1456606_a_at |               |                                                                                        | AV259240  | 4.9771 | 8.3946  | -3.4175 |
| 1444602_at   | Ophn1         | oligophrenin 1                                                                         | BE136101  | 2.5242 | 5.9453  | -3.4210 |
| 1454832_at   | Phactr1       | phosphatase and actin regulator 1                                                      | BG228702  | 4.6885 | 8.1114  | -3.4229 |
| 1429663_at   | Katnal2       | katanin p60 subunit A-like 2                                                           | AK014074  | 4.4196 | 7.8447  | -3.4251 |
| 1418263_at   | Ddx25         | DEAD (Asp-Glu-Ala-Asp) box polypeptide 25                                              | BC024852  | 4.3302 | 7.7563  | -3.4261 |
| 1460038_at   | Pou3f1        | POU domain, class 3, transcription factor 1                                            | BG065255  | 3.1910 | 6.6186  | -3.4275 |
| 1423362_at   | Sort1         | sortilin 1                                                                             | AV247637  | 5.9422 | 9.3711  | -3.4289 |
| 1451348_at   | Deptor        | DEP domain containing MTOR-interacting protein                                         | BC004774  | 6.4824 | 9.9117  | -3.4293 |
| 1418271_at   | Bhlhe22       | basic helix-loop-helix family, member e22                                              | NM_021560 | 6.2441 | 9.6769  | -3.4329 |
| 1427054_s_at | Abi3bp        | ABI gene family, member 3 (NESH) binding protein                                       | BC026627  | 2.6148 | 6.0489  | -3.4341 |
| 1454169_a_at | Epsti1        | epithelial stromal interaction 1 (breast)                                              | AK017174  | 3.0227 | 6.4574  | -3.4347 |
| 1430755_at   | 4930452G13Rik | RIKEN cDNA 4930452G13 gene                                                             | BF018617  | 4.9107 | 8.3455  | -3.4348 |
| 1435256_at   | Clip3         | CAP-GLY domain containing linker protein 3                                             | BQ174720  | 4.9839 | 8.4187  | -3.4349 |
| 1433155_at   | B230204H03Rik | RIKEN cDNA B230204H03 gene                                                             | AK020986  | 3.4443 | 6.8792  | -3.4350 |
| 1450069_a_at | Celf2         | CUGBP, Elav-like family member 2                                                       | BB667096  | 6.2436 | 9.6816  | -3.4380 |
| 1440231_at   | Mtap9         | microtubule-associated protein 9                                                       | BM205212  | 5.0107 | 8.4507  | -3.4400 |
| 1455793_at   | Fam149a       | family with sequence similarity 149, member A                                          | BB766438  | 5.7575 | 9.1994  | -3.4418 |

|              |               |                                                                                                              |           |        |         |         |
|--------------|---------------|--------------------------------------------------------------------------------------------------------------|-----------|--------|---------|---------|
| 1460553_at   | 1700025K23Rik | RIKEN cDNA 1700025K23 gene                                                                                   | BF466605  | 4.4573 | 7.9021  | -3.4448 |
| 1450875_at   | Gpr37         | G protein-coupled receptor 37                                                                                | BQ175510  | 5.0002 | 8.4548  | -3.4546 |
| 1421921_at   | Serpina3m     | serine (or cysteine) peptidase inhibitor, clade A, member 3M                                                 | BC011158  | 3.7037 | 7.1626  | -3.4589 |
| 1455582_at   | C1qtnf1       | C1q and tumor necrosis factor related protein 1                                                              | BI156044  | 6.7524 | 10.2125 | -3.4601 |
| 1451679_at   | Arxes1        | adipocyte-related X-chromosome expressed sequence 1                                                          | BC016270  | 4.5818 | 8.0419  | -3.4601 |
| 1438982_s_at | Flywch2       | FLYWCH family member 2                                                                                       | BB251185  | 3.4959 | 6.9566  | -3.4607 |
| 1441075_at   | Nostrin       | nitric oxide synthase trafficker                                                                             | AW541389  | 3.8808 | 7.3456  | -3.4648 |
| 1455425_at   | Tet1          | tet methylcytosine dioxygenase 1                                                                             | BG071655  | 3.0872 | 6.5530  | -3.4658 |
| 1428852_at   | Dock3         | dedicator of cyto-kinesis 3                                                                                  | AK018140  | 3.8342 | 7.3087  | -3.4744 |
| 1435158_at   | Rbm12b1       | RNA binding motif protein 12 B1                                                                              | BB796313  | 3.5117 | 6.9873  | -3.4756 |
| 1425702_a_at | Enpp5         | ectonucleotide pyrophosphatase/phosphodiesterase 5                                                           | BC011294  | 4.5657 | 8.0419  | -3.4762 |
| 1441065_at   | Shc3          | src homology 2 domain-containing transforming protein C3                                                     | BB305753  | 4.1489 | 7.6260  | -3.4771 |
| 1425502_x_at |               |                                                                                                              | BC003207  | 5.5812 | 9.0586  | -3.4774 |
| 1455845_at   | Wscd1         | WSC domain containing 1                                                                                      | AV099154  | 4.3609 | 7.8384  | -3.4775 |
| 1417073_a_at | Qk            | quaking                                                                                                      | NM_021881 | 7.7196 | 11.2037 | -3.4840 |
| 1438543_at   |               |                                                                                                              | BB453810  | 3.4443 | 6.9332  | -3.4889 |
| 1429798_s_at | Cmtm5         | CKLF-like MARVEL transmembrane domain containing 5                                                           | AV029626  | 5.9050 | 9.3978  | -3.4928 |
| 1445804_at   |               |                                                                                                              | BB667304  | 2.8435 | 6.3376  | -3.4941 |
| 1417569_at   | Ncald         | neurocalcin delta                                                                                            | BG071381  | 6.7665 | 10.2748 | -3.5083 |
| 1435705_at   | Zscan18       | zinc finger and SCAN domain containing 18                                                                    | BB305660  | 3.0872 | 6.5981  | -3.5109 |
| 1457423_at   | Nalcn         | sodium leak channel, non-selective                                                                           | AI849508  | 4.5592 | 8.0779  | -3.5188 |
| 1436735_at   | Nsun3         | NOL1/NOP2/Sun domain family member 3                                                                         | BB769111  | 3.9833 | 7.5058  | -3.5225 |
| 1429896_at   | 5830408B19Rik | RIKEN cDNA 5830408B19 gene                                                                                   | BE135996  | 3.7968 | 7.3208  | -3.5240 |
| 1428157_at   | Gng2          | guanine nucleotide binding protein (G protein), gamma 2                                                      | AV021455  | 2.9860 | 6.5111  | -3.5251 |
| 1430105_at   | 1700042O10Rik | RIKEN cDNA 1700042O10 gene                                                                                   | AK006690  | 3.1525 | 6.6801  | -3.5276 |
| 1423509_a_at | Iapp          | islet amyloid polypeptide                                                                                    | BM569571  | 4.7989 | 8.3423  | -3.5434 |
| 1418713_at   | Pcbd1         | pterin 4 alpha carbinolamine dehydratase/dimerization cofactor of hepatocyte nuclear factor 1 alpha (TCF1) 1 | NM_025273 | 6.6423 | 10.1864 | -3.5441 |
| 1453192_at   | Fam101a       | family with sequence similarity 101, member A                                                                | AK014112  | 4.0372 | 7.5840  | -3.5469 |
| 1419593_at   | Greb1         | gene regulated by estrogen in breast cancer protein                                                          | NM_015764 | 4.8397 | 8.3903  | -3.5506 |
| 1430596_s_at | Vgll3         | vestigial like 3 (Drosophila)                                                                                | BG066866  | 5.3151 | 8.8659  | -3.5507 |
| 1448465_at   | Nipsnap1      | 4-nitrophenylphosphatase domain and non-neuronal SNAP25-like protein homolog 1 (C. elegans)                  | BC010837  | 5.8442 | 9.3961  | -3.5518 |
| 1418464_at   | Matn4         | matrilin 4                                                                                                   | NM_013592 | 5.5752 | 9.1290  | -3.5538 |
| 1439864_at   | Ccdc40        | coiled-coil domain containing 40                                                                             | AV280756  | 4.6675 | 8.2266  | -3.5591 |
| 1440339_at   | Enpp1         | ectonucleotide pyrophosphatase/phosphodiesterase 1                                                           | AW910504  | 2.5162 | 6.0777  | -3.5615 |
| 1453009_at   | Cpm           | carboxypeptidase M                                                                                           | AK004327  | 3.3762 | 6.9527  | -3.5766 |
| 1436238_at   | Lgi3          | leucine-rich repeat LGI family, member 3                                                                     | AI841179  | 3.2416 | 6.8186  | -3.5770 |
| 1421944_a_at | Asgr1         | asialoglycoprotein receptor 1                                                                                | U09362    | 4.4687 | 8.0481  | -3.5794 |
| 1437072_at   | Arhgap25      | Rho GTPase activating protein 25                                                                             | BM241218  | 3.7684 | 7.3506  | -3.5821 |
| 1451322_at   | Cmb1          | carboxymethylenebutenolidase-like (Pseudomonas)                                                              | BC024580  | 5.9729 | 9.5570  | -3.5841 |
| 1424067_at   | Icam1         | intercellular adhesion molecule 1                                                                            | BC008626  | 3.9701 | 7.5585  | -3.5883 |
| 1422868_s_at | Gda           | guanine deaminase                                                                                            | NM_010266 | 3.3682 | 6.9600  | -3.5918 |
| 1454674_at   | Fez1          | fasciculation and elongation protein zeta 1 (zygin I)                                                        | AU067669  | 6.5681 | 10.1627 | -3.5946 |
| 1426263_at   | Cadm4         | cell adhesion molecule 4                                                                                     | AY059394  | 6.6263 | 10.2230 | -3.5967 |
| 1416846_a_at | Pdzrn3        | PDZ domain containing RING finger 3                                                                          | NM_018884 | 6.1370 | 9.7339  | -3.5969 |
| 1456984_at   | Scml2         | sex comb on midleg-like 2 (Drosophila)                                                                       | AV322078  | 3.5815 | 7.1787  | -3.5972 |
| 1437408_at   | Gpr126        | G protein-coupled receptor 126                                                                               | BB812574  | 5.7231 | 9.3227  | -3.5996 |
| 1433924_at   | Peg3          | paternally expressed 3                                                                                       | BM200248  | 3.2416 | 6.8564  | -3.6149 |
| 1455960_at   | Megf9         | multiple EGF-like-domains 9                                                                                  | BB483642  | 4.4196 | 8.0382  | -3.6186 |
| 1439022_at   | Phactr1       | phosphatase and actin regulator 1                                                                            | AV259240  | 5.0502 | 8.6721  | -3.6219 |
| 1440813_s_at | Plxnb3        | plexin B3                                                                                                    | AI451018  | 6.2628 | 9.8906  | -3.6277 |
| 1455127_at   | Xkr5          | X Kell blood group precursor-related family, member 5                                                        | AV293493  | 3.7529 | 7.3855  | -3.6326 |

|              |               |                                                                                        |           |        |         |         |
|--------------|---------------|----------------------------------------------------------------------------------------|-----------|--------|---------|---------|
| 1424713_at   | Calml4        | calmodulin-like 4                                                                      | AY061807  | 3.6123 | 7.2467  | -3.6345 |
| 1440944_at   | Anks1b        | ankyrin repeat and sterile alpha motif domain containing 1B                            | BF463236  | 3.3086 | 6.9450  | -3.6364 |
| 1454824_s_at | Mtus1         | mitochondrial tumor suppressor 1                                                       | BB699957  | 4.6306 | 8.2709  | -3.6403 |
| 1451154_a_at | Celf2         | CUGBP, Elav-like family member 2                                                       | BB644164  | 6.7940 | 10.4345 | -3.6405 |
| 1417585_at   | Nup210        | nucleoporin 210                                                                        | NM_018815 | 4.6941 | 8.3378  | -3.6437 |
| 1427797_s_at |               |                                                                                        | BF580235  | 5.2283 | 8.8766  | -3.6484 |
| 1439665_at   | Lpar4         | lysophosphatidic acid receptor 4                                                       | BB417145  | 5.9357 | 9.5879  | -3.6522 |
| 1443960_at   | Asrgl1        | asparaginase like 1                                                                    | BQ175377  | 4.1086 | 7.7805  | -3.6719 |
| 1418021_at   | C4b           | complement component 4B (Chido blood group)                                            | NM_009780 | 6.0109 | 9.6868  | -3.6759 |
| 1436178_at   | Leprel1       | leprecan-like 1                                                                        | AW553532  | 5.3707 | 9.0477  | -3.6770 |
| 1456389_at   | Zeb2          | zinc finger E-box binding homeobox 2                                                   | BB244754  | 5.5091 | 9.1927  | -3.6836 |
| 1429459_at   | Sema3d        | sema domain, immunoglobulin domain (Ig), short basic domain, secreted, (semaphorin) 3D | BB499147  | 3.2612 | 6.9450  | -3.6838 |
| 1435060_at   | Tmod2         | tropomodulin 2                                                                         | BB667124  | 4.8127 | 8.5036  | -3.6909 |
| 1419434_at   | Slc2a10       | solute carrier family 2 (facilitated glucose transporter), member 10                   | NM_130451 | 3.2315 | 6.9450  | -3.7135 |
| 1447806_s_at | Srpk3         | serine/arginine-rich protein specific kinase 3                                         | BB036235  | 4.2333 | 7.9471  | -3.7138 |
| 1418402_at   | Adam19        | a disintegrin and metallopeptidase domain 19 (meltrin beta)                            | NM_009616 | 5.0868 | 8.8112  | -3.7244 |
| 1421145_at   | Slc26a2       | solute carrier family 26 (sulfate transporter), member 2                               | NM_007885 | 2.9724 | 6.6978  | -3.7254 |
| 1455101_at   | Phactr2       | phosphatase and actin regulator 2                                                      | BE631955  | 2.7149 | 6.4409  | -3.7259 |
| 1421525_a_at | Naip5         | NLR family, apoptosis inhibitory protein 5                                             | NM_010870 | 3.5395 | 7.2656  | -3.7261 |
| 1426208_x_at | Plagl1        | pleiomorphic adenoma gene-like 1                                                       | AF147785  | 6.6617 | 10.3897 | -3.7280 |
| 1417600_at   | Slc15a2       | solute carrier family 15 (H+/peptide transporter), member 2                            | NM_021301 | 4.2931 | 8.0309  | -3.7378 |
| 1436501_at   | Mtus1         | mitochondrial tumor suppressor 1                                                       | BB747681  | 3.4443 | 7.1853  | -3.7410 |
| 1454646_at   | Tcp11l2       | t-complex 11 (mouse) like 2                                                            | BM245221  | 5.0970 | 8.8430  | -3.7461 |
| 1433536_at   | Lrp11         | low density lipoprotein receptor-related protein 11                                    | BB435348  | 6.0526 | 9.8004  | -3.7478 |
| 1435695_a_at | Ggct          | gamma-glutamyl cyclotransferase                                                        | AA673177  | 6.4230 | 10.1768 | -3.7539 |
| 1453593_at   | Vgll3         | vestigial like 3 (Drosophila)                                                          | BG066866  | 5.6198 | 9.3748  | -3.7550 |
| 1418750_at   | Plxnb3        | plexin B3                                                                              | NM_019587 | 5.3511 | 9.1134  | -3.7623 |
| 1451451_at   | Gca           | grancalcin                                                                             | BC021450  | 2.6565 | 6.4261  | -3.7696 |
| 1460239_at   | Tspan13       | tetraspanin 13                                                                         | BB807707  | 5.7292 | 9.4993  | -3.7700 |
| 1416318_at   | Serp1b1a      | serine (or cysteine) peptidase inhibitor, clade B, member 1a                           | AF426024  | 3.6990 | 7.4693  | -3.7703 |
| 1426272_at   | Lmbr1         | limb region 1                                                                          | BG070844  | 5.1383 | 8.9155  | -3.7772 |
| 1438202_at   | Fam109b       | family with sequence similarity 109, member B                                          | AV295563  | 3.3779 | 7.1586  | -3.7808 |
| 1436037_at   | Itga4         | integrin alpha 4                                                                       | BB205589  | 5.4269 | 9.2091  | -3.7822 |
| 1456087_at   | Nfia          | nuclear factor I/A                                                                     | BB089547  | 5.5554 | 9.3388  | -3.7835 |
| 1456498_at   | Itga4         | integrin alpha 4                                                                       | BB284583  | 4.4394 | 8.2249  | -3.7856 |
| 1417923_at   | Pak3          | p21 protein (Cdc42/Rac)-activated kinase 3                                             | BQ174935  | 4.8719 | 8.6613  | -3.7895 |
| 1416716_at   | Efs           | embryonal Fyn-associated substrate                                                     | NM_010112 | 6.2392 | 10.0319 | -3.7927 |
| 1448598_at   | Mmp17         | matrix metallopeptidase 17                                                             | NM_011846 | 6.1455 | 9.9399  | -3.7944 |
| 1420764_at   | Scrg1         | scrapie responsive gene 1                                                              | NM_009136 | 4.7469 | 8.5515  | -3.8047 |
| 1439622_at   | Rassf4        | Ras association (RalGDS/AF-6) domain family member 4                                   | AV291679  | 4.5626 | 8.3672  | -3.8047 |
| 1456539_at   |               |                                                                                        | AV020412  | 4.3388 | 8.1457  | -3.8069 |
| 1424824_at   | Slain1        | SLAIN motif family, member 1                                                           | BB704967  | 2.5992 | 6.4073  | -3.8081 |
| 1421571_a_at |               |                                                                                        | NM_010741 | 8.1103 | 11.9199 | -3.8096 |
| 1423865_at   | Slc44a1       | solute carrier family 44, member 1                                                     | BC025941  | 6.0763 | 9.8868  | -3.8106 |
| 1436582_at   | Zdhhc15       | zinc finger, DHHC domain containing 15                                                 | BQ176228  | 4.0965 | 7.9141  | -3.8177 |
| 1437176_at   | Nlrc5         | NLR family, CARD domain containing 5                                                   | AV277444  | 4.6674 | 8.4897  | -3.8223 |
| 1455737_at   | Ppm1h         | protein phosphatase 1H (PP2C domain containing)                                        | AU040848  | 5.6110 | 9.4378  | -3.8268 |
| 1455257_at   | Itgb3         | integrin beta 3                                                                        | AV352983  | 4.7901 | 8.6179  | -3.8278 |
| 1427004_at   | Fbxo2         | F-box protein 2                                                                        | BB311718  | 7.6586 | 11.4945 | -3.8359 |
| 1428260_at   | Atf1          | atlastin GTPase 1                                                                      | BE948928  | 4.0372 | 7.8798  | -3.8427 |
| 1419043_a_at | Iigp1         | interferon inducible GTPase 1                                                          | BM239828  | 6.6564 | 10.5126 | -3.8562 |
| 1422997_s_at |               |                                                                                        | NM_134188 | 5.5701 | 9.4274  | -3.8573 |
| 1423294_at   | Mest          | mesoderm specific transcript                                                           | AW555393  | 4.8277 | 8.6861  | -3.8583 |
| 1445523_at   | Gjc3          | gap junction protein, gamma 3                                                          | BB315012  | 4.6801 | 8.5413  | -3.8611 |
| 1452903_at   | 6230427J02Rik | RIKEN cDNA 6230427J02 gene                                                             | AK020090  | 6.7937 | 10.6640 | -3.8704 |
| 1460607_at   | Igsf11        | immunoglobulin superfamily, member 11                                                  | BM899311  | 5.0745 | 8.9461  | -3.8716 |

|              |               |                                                                                             |           |        |         |         |
|--------------|---------------|---------------------------------------------------------------------------------------------|-----------|--------|---------|---------|
| 1456764_at   | Slc35f3       | solute carrier family 35, member F3                                                         | BB427860  | 3.3762 | 7.2490  | -3.8728 |
| 1453487_at   | Dhdh          | dihydrodiol dehydrogenase (dimeric)                                                         | AK005050  | 3.5815 | 7.4557  | -3.8742 |
| 1428447_at   | Tmem14a       | transmembrane protein 14A                                                                   | AK017734  | 4.2333 | 8.1114  | -3.8780 |
| 1427072_at   |               |                                                                                             | BM119481  | 5.6019 | 9.4836  | -3.8817 |
| 1415857_at   | Emb           | embigin                                                                                     | BG064842  | 6.0437 | 9.9296  | -3.8859 |
| 1455343_at   | Plekha7       | pleckstrin homology domain containing, family A member 7                                    | BF159528  | 3.6732 | 7.5689  | -3.8958 |
| 1447299_at   |               |                                                                                             | BF321332  | 3.9185 | 7.8151  | -3.8965 |
| 1448665_at   | Dmd           | dystrophin, muscular dystrophy                                                              | NM_007868 | 3.9701 | 7.8707  | -3.9006 |
| 1448475_at   | Olfml3        | olfactomedin-like 3                                                                         | NM_133859 | 5.4425 | 9.3448  | -3.9023 |
| 1429543_at   | 6230424C14Rik | RIKEN cDNA 6230424C14 gene                                                                  | AI553459  | 5.9873 | 9.9032  | -3.9159 |
| 1425469_a_at |               |                                                                                             | BC003855  | 8.6053 | 12.5311 | -3.9258 |
| 1437698_at   | Myo5b         | myosin VB                                                                                   | AV370579  | 4.6296 | 8.5618  | -3.9321 |
| 1417568_at   | Ncald         | neurocalcin delta                                                                           | BG071381  | 5.5842 | 9.5168  | -3.9326 |
| 1460360_at   | Asrgl1        | asparaginase like 1                                                                         | AU040643  | 6.4574 | 10.3979 | -3.9405 |
| 1452840_at   | 1500009L16Rik | RIKEN cDNA 1500009L16 gene                                                                  | AV216011  | 3.4976 | 7.4391  | -3.9415 |
| 1452250_a_at | Col6a2        | collagen, type VI, alpha 2                                                                  | BI455189  | 6.0189 | 9.9646  | -3.9457 |
| 1456748_a_at | Nipsnap1      | 4-nitrophenylphosphatase domain and non-neuronal SNAP25-like protein homolog 1 (C. elegans) | AV306253  | 5.7515 | 9.6973  | -3.9458 |
| 1424271_at   | Dclk1         | doublecortin-like kinase 1                                                                  | AW105916  | 6.1639 | 10.1136 | -3.9497 |
| 1424396_a_at | Asrgl1        | asparaginase like 1                                                                         | AU040643  | 7.0574 | 11.0260 | -3.9686 |
| 1437766_at   |               |                                                                                             | AA177898  | 4.7538 | 8.7343  | -3.9805 |
| 1424270_at   | Dclk1         | doublecortin-like kinase 1                                                                  | AW105916  | 4.4791 | 8.4625  | -3.9834 |
| 1450268_at   | Fign          | fidgetin                                                                                    | NM_021716 | 3.9759 | 7.9631  | -3.9872 |
| 1442338_at   |               |                                                                                             | BB740904  | 4.5566 | 8.5579  | -4.0014 |
| 1421374_a_at | Fxyd1         | FXYD domain-containing ion transport regulator 1                                            | NM_019503 | 6.0578 | 10.0596 | -4.0018 |
| 1429315_at   | Syt11         | synaptotagmin XI                                                                            | AK018343  | 4.8980 | 8.9065  | -4.0085 |
| 1441957_x_at | 2410076I21Rik | RIKEN cDNA 2410076I21 gene                                                                  | AV216663  | 3.0227 | 7.0348  | -4.0121 |
| 1428156_at   | Gng2          | guanine nucleotide binding protein (G protein), gamma 2                                     | AV021455  | 3.3062 | 7.3208  | -4.0146 |
| 1436948_a_at | Fam70a        | family with sequence similarity 70, member A                                                | BB520013  | 3.1525 | 7.1708  | -4.0183 |
| 1449074_at   | 1700019N12Rik | RIKEN cDNA 1700019N12 gene                                                                  | NM_025953 | 3.2028 | 7.2212  | -4.0184 |
| 1455468_at   | Dpy19l3       | dpy-19-like 3 (C. elegans)                                                                  | BB768758  | 4.7207 | 8.7410  | -4.0203 |
| 1431980_a_at | As3mt         | arsenic (+3 oxidation state) methyltransferase                                              | AK009814  | 3.4443 | 7.4693  | -4.0251 |
| 1452514_a_at | Kit           | kit oncogene                                                                                | X65997    | 4.1439 | 8.1710  | -4.0271 |
| 1451506_at   | Mef2c         | myocyte enhancer factor 2C                                                                  | BB280300  | 4.7905 | 8.8240  | -4.0336 |
| 1457118_at   |               |                                                                                             | AV353605  | 5.3077 | 9.3485  | -4.0408 |
| 1456035_at   | Nxf3          | nuclear RNA export factor 3                                                                 | BM236468  | 5.9466 | 9.9890  | -4.0424 |
| 1460273_a_at | Naip2         | NLR family, apoptosis inhibitory protein 2                                                  | NM_010872 | 3.9137 | 7.9631  | -4.0494 |
| 1448260_at   | Uchl1         | ubiquitin carboxy-terminal hydrolase L1                                                     | NM_011670 | 5.7124 | 9.7741  | -4.0617 |
| 1456464_x_at | Syt11         | synaptotagmin XI                                                                            | BB129990  | 5.6993 | 9.7636  | -4.0643 |
| 1441972_at   | 6230424C14Rik | RIKEN cDNA 6230424C14 gene                                                                  | BE949277  | 6.2392 | 10.3078 | -4.0686 |
| 1423266_at   | 2810405K02Rik | RIKEN cDNA 2810405K02 gene                                                                  | AI836168  | 5.5399 | 9.6126  | -4.0727 |
| 1448945_at   | Plip          | plasma membrane proteolipid                                                                 | BC024534  | 5.8126 | 9.8875  | -4.0749 |
| 1440142_s_at | Gfap          | glial fibrillary acidic protein                                                             | BB750040  | 4.0352 | 8.1264  | -4.0911 |
| 1422782_s_at | Tlr3          | toll-like receptor 3                                                                        | NM_126166 | 4.4783 | 8.5732  | -4.0949 |
| 1443882_at   | Slc26a2       | solute carrier family 26 (sulfate transporter), member 2                                    | BI150812  | 7.4055 | 11.5071 | -4.1016 |
| 1418407_at   | Pde8a         | phosphodiesterase 8A                                                                        | BB220000  | 3.6851 | 7.7871  | -4.1020 |
| 1435078_at   | Tanc2         | tetratricopeptide repeat, ankyrin repeat and coiled-coil containing 2                       | BQ173895  | 5.5537 | 9.6711  | -4.1174 |
| 1416498_at   | Ppic          | peptidylprolyl isomerase C                                                                  | NM_008908 | 8.0336 | 12.1543 | -4.1207 |
| 1443634_at   |               |                                                                                             | BB761583  | 4.1881 | 8.3108  | -4.1227 |
| 1460463_at   | H60c          | histocompatibility 60c                                                                      | AK014573  | 3.2626 | 7.3855  | -4.1229 |
| 1450673_at   | Col9a2        | collagen, type IX, alpha 2                                                                  | NM_007741 | 4.5145 | 8.6422  | -4.1277 |
| 1435197_at   | Pou3f3        | POU domain, class 3, transcription factor 3                                                 | BE993443  | 3.9230 | 8.0510  | -4.1280 |
| 1427019_at   | Ptprz1        | protein tyrosine phosphatase, receptor type Z, polypeptide 1                                | BC002298  | 3.2599 | 7.3937  | -4.1338 |
| 1448669_at   | Dkk3          | dickkopf homolog 3 (Xenopus laevis)                                                         | AK004853  | 4.9033 | 9.0377  | -4.1343 |
| 1456208_at   | Gpat2         | glycerol-3-phosphate acyltransferase 2, mitochondrial                                       | BI407212  | 4.5974 | 8.7343  | -4.1369 |
| 1451204_at   | Scara5        | scavenger receptor class A, member 5 (putative)                                             | BC016096  | 6.0808 | 10.2178 | -4.1370 |
| 1436309_at   | Neto2         | neuropilin (NRP) and tolloid (TLL)-like 2                                                   | BB125651  | 4.7109 | 8.8524  | -4.1415 |

|              |               |                                                                          |           |        |         |         |
|--------------|---------------|--------------------------------------------------------------------------|-----------|--------|---------|---------|
| 1418589_a_at | Mlf1          | myeloid leukemia factor 1                                                | AF100171  | 2.7375 | 6.8973  | -4.1599 |
| 1419108_at   | Ophn1         | oligophrenin 1                                                           | BI134110  | 4.8037 | 8.9682  | -4.1644 |
| 1424395_at   | Asrgl1        | asparaginase like 1                                                      | AU040643  | 5.2220 | 9.3870  | -4.1651 |
| 1419276_at   | Enpp1         | ectonucleotide<br>pyrophosphatase/phosphodiesterase 1                    | AF339910  | 2.9350 | 7.1280  | -4.1930 |
| 1455337_at   | Fgd4          | FYVE, RhoGEF and PH domain containing 4                                  | BQ175875  | 3.4740 | 7.6739  | -4.1999 |
| 1424382_at   | Rcn3          | reticulocalbin 3, EF-hand calcium binding<br>domain                      | BC025602  | 6.0949 | 10.2972 | -4.2022 |
| 1446715_at   | Abca13        | ATP-binding cassette, sub-family A (ABC1),<br>member 13                  | BB503961  | 2.8940 | 7.1003  | -4.2063 |
| 1431475_a_at | Hoxa10        | homeobox A10                                                             | AK002670  | 3.5957 | 7.8022  | -4.2066 |
| 1417901_a_at | Ica1          | islet cell autoantigen 1                                                 | NM_010492 | 4.6564 | 8.8643  | -4.2079 |
| 1424265_at   | Npl           | N-acetylneuraminase pyruvate lyase                                       | BC022734  | 4.1526 | 8.3745  | -4.2219 |
| 1423537_at   | Gap43         | growth associated protein 43                                             | BB622036  | 4.3588 | 8.5845  | -4.2257 |
| 1452967_at   | Gtsf1         | gametocyte specific factor 1                                             | AK005675  | 5.3298 | 9.5588  | -4.2291 |
| 1460252_s_at | Zfp105        | zinc finger protein 105                                                  | NM_009544 | 3.4591 | 7.6926  | -4.2335 |
| 1434918_at   | Sox6          | SRY-box containing gene 6                                                | AV281802  | 6.0579 | 10.2922 | -4.2343 |
| 1418674_at   | Osmr          | oncostatin M receptor                                                    | AB015978  | 3.6819 | 7.9300  | -4.2481 |
| 1448254_at   | Ptn           | pleiotrophin                                                             | BC002064  | 6.1807 | 10.4293 | -4.2485 |
| 1416617_at   | Acss1         | acyl-CoA synthetase short-chain family member<br>1                       | NM_080575 | 4.0932 | 8.3469  | -4.2536 |
| 1436171_at   | Arhgap30      | Rho GTPase activating protein 30                                         | BM244999  | 4.7666 | 9.0331  | -4.2665 |
| 1455978_a_at | Matn2         | matrilin 2                                                               | BB338441  | 6.6421 | 10.9103 | -4.2682 |
| 1452761_a_at | Rbms3         | RNA binding motif, single stranded interacting<br>protein                | AK018466  | 6.2201 | 10.4906 | -4.2704 |
| 1417391_a_at | Il16          | interleukin 16                                                           | BC026894  | 4.6694 | 8.9407  | -4.2713 |
| 1419229_at   |               |                                                                          | NM_021300 | 4.1907 | 8.4630  | -4.2723 |
| 1435193_at   | A230050P20Rik | RIKEN cDNA A230050P20 gene                                               | BB085904  | 4.6276 | 8.9005  | -4.2728 |
| 1429314_at   | Syt11         | synaptotagmin XI                                                         | AK018343  | 5.5499 | 9.8282  | -4.2783 |
| 1426959_at   | Bdh1          | 3-hydroxybutyrate dehydrogenase, type 1                                  | BF322712  | 3.2416 | 7.5241  | -4.2825 |
| 1451289_at   | Dclk1         | doublecortin-like kinase 1                                               | AW105916  | 5.5666 | 9.8531  | -4.2865 |
| 1431644_a_at | Ica1          | islet cell autoantigen 1                                                 | AK005965  | 3.2550 | 7.5434  | -4.2883 |
| 1455395_at   | Oxsm          | 3-oxoacyl-ACP synthase, mitochondrial                                    | BB446073  | 3.2574 | 7.5511  | -4.2937 |
| 1456093_at   | Zfp536        | zinc finger protein 536                                                  | BB732439  | 3.9153 | 8.2169  | -4.3016 |
| 1448211_at   | Atp6v0e2      | ATPase, H+ transporting, lysosomal V0 subunit<br>E2                      | NM_133764 | 6.5866 | 10.8895 | -4.3029 |
| 1417859_at   | Gas7          | growth arrest specific 7                                                 | NM_008088 | 5.0970 | 9.4155  | -4.3186 |
| 1449264_at   | Syt11         | synaptotagmin XI                                                         | BC025207  | 3.9267 | 8.2458  | -4.3190 |
| 1424698_s_at | Gca           | grancalcin                                                               | BC021450  | 3.2085 | 7.5278  | -4.3193 |
| 1435465_at   | Kbtbd11       | kelch repeat and BTB (POZ) domain containing<br>11                       | AW049906  | 4.9033 | 9.2272  | -4.3239 |
| 1439568_at   | Greb1         | gene regulated by estrogen in breast cancer<br>protein                   | AV373997  | 4.4763 | 8.8005  | -4.3242 |
| 1430579_at   | Tnik          | TRAF2 and NCK interacting kinase                                         | AW045551  | 3.0984 | 7.4308  | -4.3324 |
| 1427195_at   | Slc26a2       | solute carrier family 26 (sulfate transporter),<br>member 2              | W91587    | 6.9450 | 11.3047 | -4.3597 |
| 1436098_at   | Bche          | butyrylcholinesterase                                                    | BB667452  | 4.6659 | 9.0349  | -4.3690 |
| 1433691_at   | Ppp1r3c       | protein phosphatase 1, regulatory (inhibitor)<br>subunit 3C              | BQ176864  | 3.8741 | 8.2505  | -4.3764 |
| 1423166_at   | Cd36          | CD36 antigen                                                             | BB534670  | 3.6090 | 7.9861  | -4.3771 |
| 1425894_at   | Mrgprf        | MAS-related GPR, member F                                                | BC019711  | 4.7820 | 9.1654  | -4.3834 |
| 1451507_at   | Mef2c         | myocyte enhancer factor 2C                                               | BB280300  | 3.3086 | 7.6926  | -4.3840 |
| 1416414_at   | Emilin1       | elastin microfibril interfacier 1                                        | NM_133918 | 6.4388 | 10.8325 | -4.3937 |
| 1455722_at   |               |                                                                          | BB425316  | 3.9755 | 8.3716  | -4.3961 |
| 1423429_at   | Rhox5         | reproductive homeobox 5                                                  | BM210473  | 8.1343 | 12.5326 | -4.3983 |
| 1422618_x_at |               |                                                                          | NM_009529 | 3.4184 | 7.8215  | -4.4031 |
| 1453366_at   | Tdrkh         | tudor and KH domain containing protein                                   | AK012596  | 4.9055 | 9.3103  | -4.4048 |
| 1456954_at   | Kcna6         | potassium voltage-gated channel, shaker-<br>related, subfamily, member 6 | BM119753  | 4.7207 | 9.1290  | -4.4083 |
| 1453188_at   | 6230424C14Rik | RIKEN cDNA 6230424C14 gene                                               | AI553459  | 4.8114 | 9.2206  | -4.4092 |
| 1438288_x_at | 1110059G02Rik | RIKEN cDNA 1110059G02 gene                                               | BB766817  | 3.9361 | 8.3548  | -4.4187 |
| 1419550_a_at | Stk39         | serine/threonine kinase 39                                               | BG919998  | 3.9024 | 8.3289  | -4.4264 |
| 1447927_at   |               |                                                                          | BG092512  | 5.5812 | 10.0309 | -4.4497 |
| 1419062_at   | Epb4.1l3      | erythrocyte protein band 4.1-like 3                                      | NM_013813 | 5.2571 | 9.7083  | -4.4512 |
| 1421163_a_at | Nfia          | nuclear factor I/A                                                       | AF326553  | 4.1186 | 8.5770  | -4.4584 |
| 1436974_at   | Tmem88b       | transmembrane protein 88B                                                | AV327597  | 3.8626 | 8.3237  | -4.4611 |

|              |               |                                                                                                 |           |        |         |         |
|--------------|---------------|-------------------------------------------------------------------------------------------------|-----------|--------|---------|---------|
| 1436166_at   | Stox2         | storkhead box 2                                                                                 | AV231210  | 4.8217 | 9.3073  | -4.4856 |
| 1435553_at   | Pdzd2         | PDZ domain containing 2                                                                         | AV376136  | 3.8342 | 8.3216  | -4.4874 |
| 1436937_at   | Rbms3         | RNA binding motif, single stranded interacting protein                                          | BB053506  | 4.9575 | 9.4458  | -4.4883 |
| 1438018_at   | Hook1         | hook homolog 1 (Drosophila)                                                                     | BB463518  | 4.3362 | 8.8269  | -4.4907 |
| 1423091_a_at | Gpm6b         | glycoprotein m6b                                                                                | AK016567  | 7.4809 | 11.9783 | -4.4974 |
| 1417780_at   | Lass4         | LAG1 homolog, ceramide synthase 4                                                               | BB006809  | 4.2858 | 8.7886  | -4.5028 |
| 1431302_a_at | Nudt7         | nudix (nucleoside diphosphate linked moiety X)-type motif 7                                     | AK011172  | 3.7420 | 8.2472  | -4.5052 |
| 1452270_s_at | Cubn          | cubilin (intrinsic factor-cobalamin receptor)                                                   | AF197159  | 4.1059 | 8.6118  | -4.5059 |
| 1429203_at   | 2410076I21Rik | RIKEN cDNA 2410076I21 gene                                                                      | AK010725  | 4.5814 | 9.0959  | -4.5146 |
| 1418601_at   | Aldh1a7       | aldehyde dehydrogenase family 1, subfamily A7                                                   | NM_011921 | 3.6768 | 8.1974  | -4.5206 |
| 1417952_at   | Cyp2j6        | cytochrome P450, family 2, subfamily j, polypeptide 6                                           | NM_010008 | 4.5592 | 9.0809  | -4.5217 |
| 1417276_at   | Tulp2         | tubby-like protein 2                                                                            | NM_008807 | 4.0527 | 8.5770  | -4.5242 |
| 1419442_at   | Matn2         | matrilin 2                                                                                      | BC005429  | 6.5881 | 11.1236 | -4.5355 |
| 1428097_at   | 2510009E07Rik | RIKEN cDNA 2510009E07 gene                                                                      | AK010940  | 3.2470 | 7.7871  | -4.5401 |
| 1415856_at   | Emb           | embigin                                                                                         | BG064842  | 4.5168 | 9.0631  | -4.5462 |
| 1422617_at   |               |                                                                                                 | NM_009529 | 3.3831 | 7.9300  | -4.5469 |
| 1445247_at   | C530044C16Rik | RIKEN cDNA C530044C16 gene                                                                      | BB424956  | 4.4013 | 8.9519  | -4.5506 |
| 1433968_a_at | Megf9         | multiple EGF-like-domains 9                                                                     | BQ174710  | 6.7353 | 11.2862 | -4.5509 |
| 1425467_a_at | Plp1          | proteolipid protein (myelin) 1                                                                  | BB768495  | 6.0903 | 10.6453 | -4.5550 |
| 1423503_at   | Jam3          | junction adhesion molecule 3                                                                    | AK017692  | 4.7725 | 9.3276  | -4.5551 |
| 1435672_at   | 3830612M24    | uncharacterized protein 3830612M24                                                              | BM118658  | 5.4108 | 9.9757  | -4.5648 |
| 1436659_at   | Dclk1         | doublecortin-like kinase 1                                                                      | BB757120  | 6.2685 | 10.8616 | -4.5931 |
| 1433651_at   | Wtip          | WT1-interacting protein                                                                         | BE136550  | 4.2966 | 8.8917  | -4.5950 |
| 1437323_a_at | Iapp          | islet amyloid polypeptide                                                                       | BB434117  | 3.7409 | 8.3378  | -4.5969 |
| 1430583_at   | Nrcam         | neuron-glia-CAM-related cell adhesion molecule                                                  | BB064688  | 3.9482 | 8.5451  | -4.5970 |
| 1418187_at   | Ramp2         | receptor (calcitonin) activity modifying protein 2                                              | AF146523  | 4.5609 | 9.1623  | -4.6013 |
| 1416713_at   | Tppp3         | tubulin polymerization-promoting protein family member 3                                        | NM_026481 | 5.9357 | 10.5410 | -4.6053 |
| 1435363_at   | Plekhg1       | pleckstrin homology domain containing, family G (with RhoGef domain) member 1                   | BG073502  | 4.2966 | 8.9095  | -4.6129 |
| 1434353_at   | Sfmbt2        | Scm-like with four mbt domains 2                                                                | BM200222  | 3.5226 | 8.1372  | -4.6146 |
| 1424852_at   | Mef2c         | myocyte enhancer factor 2C                                                                      | BB280300  | 4.6017 | 9.2189  | -4.6172 |
| 1416357_a_at | Mcam          | melanoma cell adhesion molecule                                                                 | NM_023061 | 4.8510 | 9.4775  | -4.6265 |
| 1417312_at   | Dkk3          | dickkopf homolog 3 (Xenopus laevis)                                                             | AK004853  | 4.6248 | 9.2539  | -4.6291 |
| 1426621_a_at | Ppp2r2b       | protein phosphatase 2 (formerly 2A), regulatory subunit B (PR 52), beta isoform                 | BB560759  | 3.3246 | 7.9573  | -4.6328 |
| 1416872_at   | Tspan6        | tetraspanin 6                                                                                   | NM_019656 | 4.3443 | 8.9798  | -4.6355 |
| 1417251_at   | Palmd         | palmelphin                                                                                      | NM_023245 | 3.4062 | 8.0419  | -4.6356 |
| 1416326_at   | Crip1         | cysteine-rich protein 1 (intestinal)                                                            | NM_007763 | 6.4478 | 11.0905 | -4.6427 |
| 1432205_a_at | Mtus2         | microtubule associated tumor suppressor candidate 2                                             | AK002529  | 3.9910 | 8.6446  | -4.6536 |
| 1448550_at   | Lbp           | lipopolysaccharide binding protein                                                              | NM_008489 | 5.1103 | 9.7850  | -4.6747 |
| 1449465_at   | Reln          | reelin                                                                                          | NM_011261 | 4.2356 | 8.9155  | -4.6799 |
| 1425826_a_at | Sorbs1        | sorbin and SH3 domain containing 1                                                              | AF078667  | 6.0732 | 10.7570 | -4.6838 |
| 1454727_at   | Afap1I1       | actin filament associated protein 1-like 1                                                      | BB106834  | 4.4954 | 9.1846  | -4.6892 |
| 1415874_at   | Spry1         | sprouty homolog 1 (Drosophila)                                                                  | NM_011896 | 5.4108 | 10.1040 | -4.6932 |
| 1417482_at   | Tex19.1       | testis expressed gene 19.1                                                                      | NM_028602 | 4.2560 | 8.9510  | -4.6949 |
| 1435714_x_at | Il17d         | interleukin 17D                                                                                 | BB809808  | 2.9236 | 7.6333  | -4.7097 |
| 1435123_at   | Efr3b         | EFR3 homolog B (S. cerevisiae)                                                                  | BB795377  | 4.4150 | 9.1290  | -4.7140 |
| 1443934_at   | 9230110C19Rik | RIKEN cDNA 9230110C19 gene                                                                      | AI467525  | 4.3995 | 9.1212  | -4.7217 |
| 1423852_at   | Shisa2        | shisa homolog 2 (Xenopus laevis)                                                                | BC024118  | 3.3442 | 8.0726  | -4.7284 |
| 1437462_x_at | Mmp15         | matrix metalloproteinase 15                                                                     | BB484002  | 3.5616 | 8.3199  | -4.7583 |
| 1434593_at   | Eif5a2        | eukaryotic translation initiation factor 5A2                                                    | AV271901  | 4.1595 | 8.9215  | -4.7619 |
| 1421027_a_at | Mef2c         | myocyte enhancer factor 2C                                                                      | AI595932  | 4.6281 | 9.4253  | -4.7972 |
| 1448926_at   | Hoxa5         | homeobox A5                                                                                     | BC011063  | 3.6386 | 8.4383  | -4.7996 |
| 1451244_a_at | Zfp422        | zinc finger protein 422                                                                         | BC018339  | 4.1140 | 8.9155  | -4.8015 |
| 1440435_at   | Ky            | kyphoscoliosis peptidase                                                                        | BB126077  | 4.2583 | 9.0711  | -4.8128 |
| 1439827_at   | Adams12       | a disintegrin-like and metalloproteinase (reprolysin type) with thrombospondin type 1 motif, 12 | BB004039  | 3.1802 | 7.9936  | -4.8134 |
| 1443904_at   | Fads6         | fatty acid desaturase domain family, member 6                                                   | BE996238  | 3.2416 | 8.0618  | -4.8203 |
| 1434073_at   |               |                                                                                                 | BB028100  | 3.3762 | 8.2023  | -4.8262 |
| 1438511_a_at | 1190002H23Rik | RIKEN cDNA 1190002H23 gene                                                                      | BB408123  | 7.1711 | 12.0105 | -4.8394 |

|              |               |                                                                                  |           |        |         |         |
|--------------|---------------|----------------------------------------------------------------------------------|-----------|--------|---------|---------|
| 1422498_at   | Mageh1        | melanoma antigen, family H, 1                                                    | AF319981  | 3.4752 | 8.3152  | -4.8400 |
| 1434121_at   | Lgi4          | leucine-rich repeat LGI family, member 4                                         | BB756793  | 5.3521 | 10.1995 | -4.8474 |
| 1442873_at   | Fign          | fidgetin                                                                         | BB479296  | 3.1069 | 7.9573  | -4.8505 |
| 1457157_at   | Plch1         | phospholipase C, eta 1                                                           | BB247624  | 3.5815 | 8.4355  | -4.8540 |
| 1457778_at   | Stox2         | storkhead box 2                                                                  | BB364290  | 3.2416 | 8.0956  | -4.8540 |
| 1435987_x_at | 1110059G02Rik | RIKEN cDNA 1110059G02 gene                                                       | BM570681  | 3.0872 | 7.9515  | -4.8643 |
| 1423250_a_at | Tgfb2         | transforming growth factor, beta 2                                               | BF144658  | 4.7425 | 9.6182  | -4.8757 |
| 1456033_at   | Tbx4          | T-box 4                                                                          | AV226212  | 4.1820 | 9.0582  | -4.8763 |
| 1429413_at   | Cpm           | carboxypeptidase M                                                               | AK017670  | 3.4648 | 8.3452  | -4.8804 |
| 1440691_at   | Cyp2j6        | cytochrome P450, family 2, subfamily j, polypeptide 6                            | AV373767  | 3.2613 | 8.1423  | -4.8810 |
| 1423851_a_at | Shisa2        | shisa homolog 2 ( <i>Xenopus laevis</i> )                                        | BC024118  | 3.0320 | 7.9132  | -4.8812 |
| 1442542_at   | Eya4          | eyes absent 4 homolog ( <i>Drosophila</i> )                                      | BB363812  | 3.3705 | 8.2662  | -4.8957 |
| 1452284_at   | Ptprz1        | protein tyrosine phosphatase, receptor type Z, polypeptide 1                     | BC002298  | 2.9256 | 7.8321  | -4.9065 |
| 1450922_a_at | Tgfb2         | transforming growth factor, beta 2                                               | BF144658  | 4.0638 | 8.9798  | -4.9160 |
| 1415978_at   | Tubb3         | tubulin, beta 3 class III                                                        | NM_023279 | 5.0023 | 9.9246  | -4.9223 |
| 1437950_at   | Fam149a       | family with sequence similarity 149, member A                                    | BB818275  | 2.9445 | 7.8696  | -4.9251 |
| 1441836_x_at | Gtsf1         | gametocyte specific factor 1                                                     | AV045004  | 5.5288 | 10.4587 | -4.9300 |
| 1442180_at   | Dleu7         | deleted in lymphocytic leukemia, 7                                               | BB382040  | 2.8966 | 7.8384  | -4.9418 |
| 1448147_at   | Tnfrsf19      | tumor necrosis factor receptor superfamily, member 19                            | NM_013869 | 3.2876 | 8.2314  | -4.9438 |
| 1426010_a_at | Epb4.113      | erythrocyte protein band 4.1-like 3                                              | AF177146  | 4.4074 | 9.3551  | -4.9476 |
| 1453329_s_at | Nkain2        | Na <sup>+</sup> /K <sup>+</sup> transporting ATPase interacting 2                | AK018248  | 4.4867 | 9.4378  | -4.9511 |
| 1433716_x_at | Gfra2         | glial cell line derived neurotrophic factor family receptor alpha 2              | BB284482  | 5.0462 | 9.9976  | -4.9514 |
| 1439768_x_at | Sema4f        | sema domain, immunoglobulin domain (Ig), TM domain, and short cytoplasmic domain | BB271145  | 3.9441 | 8.8954  | -4.9514 |
| 1419383_at   | S100b         | S100 protein, beta polypeptide, neural                                           | NM_009115 | 4.6127 | 9.5696  | -4.9569 |
| 1423405_at   | Timp4         | tissue inhibitor of metalloproteinase 4                                          | BI788452  | 2.7744 | 7.7451  | -4.9707 |
| 1418259_a_at | Entpd2        | ectonucleoside triphosphate diphosphohydrolase 2                                 | NM_009849 | 5.4443 | 10.4265 | -4.9821 |
| 1435314_at   | Tph2          | tryptophan hydroxylase 2                                                         | BG071575  | 2.8966 | 7.8839  | -4.9873 |
| 1422545_at   | Tbx2          | T-box 2                                                                          | NM_009324 | 3.5127 | 8.5113  | -4.9985 |
| 1450883_a_at | Cd36          | CD36 antigen                                                                     | BB534670  | 3.0227 | 8.0272  | -5.0045 |
| 1421075_s_at | Cyp7b1        | cytochrome P450, family 7, subfamily b, polypeptide 1                            | NM_007825 | 3.3134 | 8.3423  | -5.0288 |
| 1442019_at   |               |                                                                                  | BB627097  | 5.6710 | 10.7201 | -5.0492 |
| 1457270_at   | Gas7          | growth arrest specific 7                                                         | AI506234  | 6.4952 | 11.5671 | -5.0719 |
| 1448269_a_at | Klhl13        | kelch-like 13 ( <i>Drosophila</i> )                                              | NM_026167 | 3.2187 | 8.3108  | -5.0921 |
| 1427884_at   | Col3a1        | collagen, type III, alpha 1                                                      | AW550625  | 4.5588 | 9.6690  | -5.1102 |
| 1450923_at   | Tgfb2         | transforming growth factor, beta 2                                               | BF144658  | 3.9975 | 9.1212  | -5.1237 |
| 1417275_at   | Mal           | myelin and lymphocyte protein, T cell differentiation protein                    | NM_010762 | 3.0872 | 8.2113  | -5.1241 |
| 1424318_at   | 1110067D22Rik | RIKEN cDNA 1110067D22 gene                                                       | BC019131  | 5.1267 | 10.2601 | -5.1334 |
| 1416232_at   | Olig2         | oligodendrocyte transcription factor 2                                           | AB038697  | 2.7614 | 7.9068  | -5.1454 |
| 1450734_at   | Sec16b        | SEC16 homolog B ( <i>S. cerevisiae</i> )                                         | NM_033354 | 3.1059 | 8.2584  | -5.1524 |
| 1438404_at   | Rnf144a       | ring finger protein 144A                                                         | BB125272  | 4.6104 | 9.7877  | -5.1773 |
| 1436870_s_at | Afap1l2       | actin filament associated protein 1-like 2                                       | BG068103  | 5.5143 | 10.6969 | -5.1826 |
| 1418599_at   | Col11a1       | collagen, type XI, alpha 1                                                       | NM_007729 | 4.5290 | 9.7152  | -5.1862 |
| 1427356_at   | Fam89a        | family with sequence similarity 89, member A                                     | BC023460  | 4.9906 | 10.1912 | -5.2006 |
| 1455176_a_at | Syt11         | synaptotagmin XI                                                                 | BF457392  | 4.1498 | 9.3609  | -5.2111 |
| 1417388_at   | Bex2          | brain expressed X-linked 2                                                       | NM_009749 | 4.7677 | 10.0050 | -5.2373 |
| 1418744_s_at | Tesc          | tescalcin                                                                        | NM_021344 | 5.9181 | 11.1562 | -5.2381 |
| 1427102_at   | Slnf4         | schlafen 4                                                                       | AF099975  | 3.8530 | 9.1259  | -5.2729 |
| 1418301_at   | Irf6          | interferon regulatory factor 6                                                   | NM_016851 | 3.4443 | 8.7410  | -5.2968 |
| 1456182_x_at | Mela          | melanoma antigen                                                                 | BB795191  | 7.3069 | 12.6103 | -5.3034 |
| 1435748_at   | Gda           | guanine deaminase                                                                | AW911807  | 4.5576 | 9.8676  | -5.3100 |
| 1418780_at   | Cyp39a1       | cytochrome P450, family 39, subfamily a, polypeptide 1                           | NM_018887 | 3.7394 | 9.0809  | -5.3416 |
| 1457275_at   | Synm          | synemin, intermediate filament protein                                           | AI594683  | 3.9666 | 9.3299  | -5.3633 |
| 1418876_at   | Foxd1         | forkhead box D1                                                                  | BB662927  | 3.8464 | 9.2116  | -5.3652 |
| 1456570_at   | Epb4.114b     | erythrocyte protein band 4.1-like 4b                                             | BB801576  | 2.8050 | 8.1793  | -5.3743 |
| 1429185_at   | Arhgef26      | Rho guanine nucleotide exchange factor (GEF)<br>26                               | BB774721  | 5.5029 | 10.8810 | -5.3781 |



|              |               |                                                                   |           |        |         |         |
|--------------|---------------|-------------------------------------------------------------------|-----------|--------|---------|---------|
| 1452762_at   | Rbms3         | RNA binding motif, single stranded interacting protein            | AK018466  | 3.9242 | 9.3103  | -5.3861 |
| 1435854_at   | Opalin        | oligodendrocytic myelin paranodal and inner loop protein          | AW490730  | 5.1383 | 10.5296 | -5.3913 |
| 1438114_x_at | Efs           | embryonal Fyn-associated substrate                                | BB168690  | 3.9701 | 9.3624  | -5.3923 |
| 1418743_a_at | Tesc          | tescalcin                                                         | NM_021344 | 4.6659 | 10.0596 | -5.3937 |
| 1435014_at   | Rab39b        | RAB39B, member RAS oncogene family                                | AV162168  | 2.4513 | 7.8461  | -5.3948 |
| 1437409_s_at | Gpr126        | G protein-coupled receptor 126                                    | BB812574  | 4.8983 | 10.3036 | -5.4054 |
| 1437197_at   | Sorbs2        | sorbin and SH3 domain containing 2                                | BB251748  | 3.0600 | 8.4739  | -5.4138 |
| 1425606_at   | Slc5a8        | solute carrier family 5 (iodide transporter), member 8            | BC017691  | 2.8350 | 8.2531  | -5.4182 |
| 1418003_at   | 1190002H23Rik | RIKEN cDNA 1190002H23 gene                                        | NM_025427 | 7.1952 | 12.6152 | -5.4200 |
| 1421074_at   | Cyp7b1        | cytochrome P450, family 7, subfamily b, polypeptide 1             | NM_007825 | 3.0872 | 8.5139  | -5.4267 |
| 1451313_a_at | 1110067D22Rik | RIKEN cDNA 1110067D22 gene                                        | BC019131  | 4.5902 | 10.0322 | -5.4420 |
| 1437318_at   | Pak3          | p21 protein (Cdc42/Rac)-activated kinase 3                        | BB468082  | 3.3411 | 8.7886  | -5.4475 |
| 1452474_a_at | Art3          | ADP-ribosyltransferase 3                                          | AJ311773  | 4.2003 | 9.6669  | -5.4666 |
| 1451961_a_at | Mbp           | myelin basic protein                                              | L07509    | 4.2966 | 9.7685  | -5.4719 |
| 1442350_at   |               |                                                                   | AV233462  | 3.2219 | 8.7092  | -5.4873 |
| 1430600_at   | Cmtm5         | CKLF-like MARVEL transmembrane domain containing 5                | AK013666  | 3.9536 | 9.4464  | -5.4927 |
| 1456326_at   | Fndc3c1       | fibronectin type III domain containing 3C1                        | BG065026  | 4.4865 | 9.9856  | -5.4991 |
| 1423341_at   | Cspg4         | chondroitin sulfate proteoglycan 4                                | BB377873  | 4.8719 | 10.3749 | -5.5030 |
| 1419595_a_at | Ggh           | gamma-glutamyl hydrolase                                          | NM_010281 | 4.4957 | 10.0162 | -5.5204 |
| 1435389_at   | Reps2         | RALBP1 associated Eps domain containing protein 2                 | BM899236  | 3.9228 | 9.4510  | -5.5281 |
| 1450567_a_at | Col2a1        | collagen, type II, alpha 1                                        | NM_031163 | 5.0107 | 10.5426 | -5.5319 |
| 1440177_at   | Grik3         | glutamate receptor, ionotropic, kainate 3                         | BM899529  | 3.3187 | 8.8555  | -5.5368 |
| 1418406_at   | Pde8a         | phosphodiesterase 8A                                              | BB220000  | 4.2966 | 9.8614  | -5.5648 |
| 1416619_at   | 4632428N05Rik | RIKEN cDNA 4632428N05 gene                                        | BC003967  | 3.7669 | 9.3321  | -5.5652 |
| 1428209_at   | Bex4          | brain expressed gene 4                                            | AK010400  | 3.5771 | 9.1796  | -5.6025 |
| 1448768_at   | Mog           | myelin oligodendrocyte glycoprotein                               | U64572    | 3.6591 | 9.2982  | -5.6391 |
| 1449065_at   | Acot1         | acyl-CoA thioesterase 1                                           | NM_012006 | 3.9130 | 9.5597  | -5.6467 |
| 1454806_at   | Fam49a        | family with sequence similarity 49, member A                      | AV228737  | 3.0874 | 8.7567  | -5.6693 |
| 1436755_at   | Itih5         | inter-alpha (globulin) inhibitor H5                               | AI317339  | 3.9017 | 9.5984  | -5.6968 |
| 1450435_at   | L1cam         | L1 cell adhesion molecule                                         | NM_008478 | 6.0047 | 11.7289 | -5.7242 |
| 1435343_at   | Dock10        | dedicator of cytokinesis 10                                       | BF715043  | 3.9083 | 9.6394  | -5.7311 |
| 1417836_at   | Gpx7          | glutathione peroxidase 7                                          | NM_024198 | 3.6128 | 9.3529  | -5.7400 |
| 1451689_a_at | Sox10         | SRY-box containing gene 10                                        | BC018551  | 6.3192 | 12.0889 | -5.7697 |
| 1425942_a_at | Gpm6b         | glycoprotein m6b                                                  | AF254879  | 5.1940 | 10.9818 | -5.7878 |
| 1448919_at   | Cd302         | CD302 antigen                                                     | NM_025422 | 3.8342 | 9.6316  | -5.7973 |
| 1421566_at   | Pet2          | plasmacytoma expressed transcript 2                               | NM_008821 | 2.7570 | 8.5579  | -5.8009 |
| 1449347_a_at |               |                                                                   | NM_021365 | 3.3025 | 9.1074  | -5.8048 |
| 1436296_x_at | Dnaic2        | dynein, axonemal, intermediate chain 2                            | BE946605  | 3.8679 | 9.6746  | -5.8067 |
| 1451191_at   | Crabp2        | cellular retinoic acid binding protein II                         | BC018397  | 5.8877 | 11.6984 | -5.8106 |
| 1429901_at   | Nkain2        | Na <sup>+</sup> /K <sup>+</sup> transporting ATPase interacting 2 | AK018248  | 2.8966 | 8.7241  | -5.8275 |
| 1423693_at   | Cela1         | chymotrypsin-like elastase family, member 1                       | BC011218  | 4.6972 | 10.5287 | -5.8314 |
| 1434606_at   | ErbB3         | v-erb-b2 erythroblastic leukemia viral oncogene homolog 3 (avian) | BF140685  | 6.0751 | 11.9087 | -5.8336 |
| 1449273_at   | Cyfp2         | cytoplasmic FMR1 interacting protein 2                            | NM_133769 | 4.2966 | 10.1578 | -5.8612 |
| 1418643_at   | Tspan13       | tetraspanin 13                                                    | BB807707  | 4.2067 | 10.0833 | -5.8767 |
| 1423640_at   | Synpr         | synaptopodin                                                      | BC026512  | 4.0103 | 9.9012  | -5.8908 |
| 1418892_at   | Rhoj          | ras homolog gene family, member J                                 | AF309564  | 4.5100 | 10.4359 | -5.9259 |
| 1419722_at   | Klk8          | kallikrein related-peptidase 8                                    | NM_008940 | 6.0903 | 12.0212 | -5.9309 |
| 1418294_at   | Epb4.114b     | erythrocyte protein band 4.1-like 4b                              | NM_019427 | 5.7843 | 11.7173 | -5.9330 |
| 1436938_at   | Rbms3         | RNA binding motif, single stranded interacting protein            | BB053506  | 4.3299 | 10.2740 | -5.9441 |
| 1428792_at   | Bcas1         | breast carcinoma amplified sequence 1                             | AK008957  | 5.6610 | 11.6074 | -5.9465 |
| 1447112_s_at | Cryl1         | crystallin, lambda 1                                              | C85932    | 5.4771 | 11.4532 | -5.9761 |
| 1451446_at   | Antxr1        | anthrax toxin receptor 1                                          | AF378762  | 5.4771 | 11.4750 | -5.9979 |
| 1424807_at   | Lama4         | laminin, alpha 4                                                  | BB053010  | 4.3584 | 10.3972 | -6.0388 |
| 1416371_at   | Apod          | apolipoprotein D                                                  | NM_007470 | 4.8053 | 10.8886 | -6.0833 |
| 1436731_at   | Zfp385b       | zinc finger protein 385B                                          | BB333374  | 4.0930 | 10.1984 | -6.1054 |
| 1450784_at   | Reck          | reversion-inducing-cysteine-rich protein with kazal motifs        | NM_016678 | 3.4986 | 9.6059  | -6.1073 |
| 1448501_at   | Tspan6        | tetraspanin 6                                                     | NM_019656 | 3.2627 | 9.3726  | -6.1099 |

|              |               |                                                                                                |           |        |         |         |
|--------------|---------------|------------------------------------------------------------------------------------------------|-----------|--------|---------|---------|
| 1424463_at   | Mfsd6         | major facilitator superfamily domain containing 6                                              | BF225441  | 3.9701 | 10.0846 | -6.1145 |
| 1441946_at   | Itih5         | inter-alpha (globulin) inhibitor H5                                                            | AV239969  | 4.3448 | 10.4702 | -6.1254 |
| 1428347_at   | Cyfp2         | cytoplasmic FMR1 interacting protein 2                                                         | AK005148  | 3.3762 | 9.5089  | -6.1327 |
| 1449154_at   | Col11a1       | collagen, type XI, alpha 1                                                                     | NM_007729 | 3.7420 | 9.8788  | -6.1368 |
| 1436204_at   | 1110059G02Rik | RIKEN cDNA 1110059G02 gene                                                                     | BM730637  | 3.6301 | 9.7718  | -6.1418 |
| 1428571_at   | Col9a1        | collagen, type IX, alpha 1                                                                     | AK004383  | 4.1529 | 10.2983 | -6.1454 |
| 1436203_a_at | 1110059G02Rik | RIKEN cDNA 1110059G02 gene                                                                     | BM730637  | 2.7735 | 8.9407  | -6.1672 |
| 1435486_at   | Pak3          | p21 protein (Cdc42/Rac)-activated kinase 3                                                     | BQ175796  | 3.4952 | 9.7513  | -6.2561 |
| 1435749_at   | Gda           | guanine deaminase                                                                              | AW911807  | 3.5127 | 9.7718  | -6.2591 |
| 1424677_at   | Cyp2j9        | cytochrome P450, family 2, subfamily j, polypeptide 9                                          | AF336850  | 3.3305 | 9.6962  | -6.3657 |
| 1437636_at   | Pydc4         | pyrin domain containing 4                                                                      | BB135602  | 4.1689 | 10.5418 | -6.3729 |
| 1416178_a_at | Plekhb1       | pleckstrin homology domain containing, family B (evectins) member 1                            | NM_013746 | 5.1280 | 11.5417 | -6.4137 |
| 1452968_at   | Cthrc1        | collagen triple helix repeat containing 1                                                      | AK003674  | 4.4976 | 10.9237 | -6.4261 |
| 1420448_at   | Rhox2a        | reproductive homeobox 2A                                                                       | NM_029203 | 4.8305 | 11.2759 | -6.4453 |
| 1452141_a_at | Sepp1         | selenoprotein P, plasma, 1                                                                     | BC001991  | 4.4942 | 10.9770 | -6.4827 |
| 1416795_at   | Cryl1         | crystallin, lambda 1                                                                           | NM_030004 | 4.7417 | 11.2421 | -6.5004 |
| 1451332_at   | Zfp521        | zinc finger protein 521                                                                        | BC021376  | 2.8217 | 9.3299  | -6.5082 |
| 1448136_at   | Enpp2         | ectonucleotide pyrophosphatase/phosphodiesterase 2                                             | BC003264  | 5.7304 | 12.2583 | -6.5279 |
| 1419100_at   | Serpina3n     | serine (or cysteine) peptidase inhibitor, clade A, member 3N                                   | NM_009252 | 5.5405 | 12.1498 | -6.6094 |
| 1450793_at   | 4930550L24Rik | RIKEN cDNA 4930550L24 gene                                                                     | NM_023774 | 3.8342 | 10.4473 | -6.6131 |
| 1427346_at   |               |                                                                                                | X96606    | 4.5566 | 11.1817 | -6.6251 |
| 1429401_at   | Stox2         | storkhead box 2                                                                                | BM114398  | 4.0426 | 10.6735 | -6.6309 |
| 1434709_at   | Nrcam         | neuron-glia-CAM-related cell adhesion molecule                                                 | BB202655  | 3.6437 | 10.2813 | -6.6376 |
| 1436737_a_at | Sorbs1        | sorbin and SH3 domain containing 1                                                             | BB737680  | 4.0971 | 10.7468 | -6.6497 |
| 1421001_a_at | Car6          | carbonic anhydrase 6                                                                           | NM_009802 | 6.0423 | 12.7014 | -6.6591 |
| 1448005_at   | Sash1         | SAM and SH3 domain containing 1                                                                | BI658899  | 4.8717 | 11.5412 | -6.6695 |
| 1434342_at   | S100b         | S100 protein, beta polypeptide, neural                                                         | BB316114  | 3.2416 | 9.9690  | -6.7274 |
| 1455256_at   | Tnik          | TRAF2 and NCK interacting kinase                                                               | AI117633  | 3.3762 | 10.1062 | -6.7300 |
| 1428471_at   | Sorbs1        | sorbin and SH3 domain containing 1                                                             | BQ176684  | 4.8229 | 11.5736 | -6.7507 |
| 1452257_at   | Bdh1          | 3-hydroxybutyrate dehydrogenase, type 1                                                        | BF322712  | 3.5189 | 10.3248 | -6.8059 |
| 1448788_at   | Cd200         | CD200 antigen                                                                                  | AF004023  | 2.9592 | 9.7735  | -6.8143 |
| 1422042_at   | Gjc3          | gap junction protein, gamma 3                                                                  | NM_080450 | 4.1160 | 10.9358 | -6.8198 |
| 1427677_a_at | Sox6          | SRY-box containing gene 6                                                                      | AJ010605  | 3.7341 | 10.5927 | -6.8585 |
| 1416003_at   | Cldn11        | claudin 11                                                                                     | NM_008770 | 3.5226 | 10.3958 | -6.8732 |
| 1418310_a_at | Rlbp1         | retinaldehyde binding protein 1                                                                | NM_020599 | 3.2110 | 10.0873 | -6.8763 |
| 1419646_a_at | Mbp           | myelin basic protein                                                                           | NM_010777 | 5.4771 | 12.4076 | -6.9305 |
| 1422530_at   | Prph          | peripherin                                                                                     | NM_013639 | 4.0327 | 11.0649 | -7.0321 |
| 1416149_at   | Olig1         | oligodendrocyte transcription factor 1                                                         | AB038696  | 3.3762 | 10.4219 | -7.0458 |
| 1425468_at   | Plp1          | proteolipid protein (myelin) 1                                                                 | BB768495  | 4.6324 | 11.7477 | -7.1153 |
| 1416114_at   | Sparcl1       | SPARC-like 1                                                                                   | NM_010097 | 4.2227 | 11.3953 | -7.1726 |
| 1436719_at   | Slc35f1       | solute carrier family 35, member F1                                                            | BB758319  | 3.7744 | 10.9500 | -7.1756 |
| 1448595_a_at | Bex1          | brain expressed gene 1                                                                         | NM_009052 | 3.4150 | 10.6140 | -7.1989 |
| 1447655_x_at | Sox6          | SRY-box containing gene 6                                                                      | BB257593  | 2.9982 | 10.1983 | -7.2001 |
| 1456901_at   | Adams20       | a disintegrin-like and metallopeptidase (reprolysin type) with thrombospondin type 1 motif, 20 | AI450842  | 2.7376 | 9.9438  | -7.2062 |
| 1452298_a_at | Myo5b         | myosin VB                                                                                      | AW546331  | 3.3672 | 10.5972 | -7.2300 |
| 1416468_at   | Aldh1a1       | aldehyde dehydrogenase family 1, subfamily A1                                                  | NM_013467 | 3.5815 | 10.9103 | -7.3288 |
| 1425546_a_at | Trf           | transferrin                                                                                    | AF440692  | 4.3993 | 11.7481 | -7.3487 |
| 1454651_x_at | Mbp           | myelin basic protein                                                                           | BE994609  | 4.7429 | 12.1527 | -7.4097 |
| 1447624_s_at | Stox2         | storkhead box 2                                                                                | BB174262  | 4.9057 | 12.3461 | -7.4404 |
| 1417795_at   | Chl1          | cell adhesion molecule with homology to L1CAM                                                  | NM_007697 | 3.3872 | 10.8677 | -7.4804 |
| 1420357_s_at |               |                                                                                                | NM_011726 | 3.1525 | 10.6773 | -7.5248 |
| 1436201_x_at | Mbp           | myelin basic protein                                                                           | BB761376  | 4.8965 | 12.4969 | -7.6004 |
| 1415845_at   | Syt4          | synaptotagmin IV                                                                               | AV336547  | 5.1786 | 12.8509 | -7.6723 |
| 1419063_at   | Ugt8a         | UDP galactosyltransferase 8A                                                                   | NM_011674 | 2.6619 | 10.3607 | -7.6988 |
| 1460258_at   | Lect1         | leukocyte cell derived chemotaxin 1                                                            | NM_010701 | 3.8539 | 11.7537 | -7.8998 |
| 1418395_at   | Slc47a1       | solute carrier family 47, member 1                                                             | NM_026183 | 2.6619 | 10.6617 | -7.9998 |
| 1448416_at   | Mgp           | matrix Gla protein                                                                             | NM_008597 | 4.2633 | 12.2693 | -8.0060 |
| 1451718_at   | Plp1          | proteolipid protein (myelin) 1                                                                 | BB768495  | 4.3090 | 12.3825 | -8.0734 |
| 1429159_at   | Itih5         | inter-alpha (globulin) inhibitor H5                                                            | AK018605  | 3.3030 | 11.5258 | -8.2227 |

|              |       |                                               |           |        |         |         |
|--------------|-------|-----------------------------------------------|-----------|--------|---------|---------|
| 1415844_at   | Syt4  | synaptotagmin IV                              | AV336547  | 3.6476 | 11.8907 | -8.2431 |
| 1457373_at   |       |                                               | BB495006  | 3.5889 | 11.9096 | -8.3207 |
| 1456228_x_at | Mbp   | myelin basic protein                          | AV328388  | 4.4491 | 12.8014 | -8.3523 |
| 1422643_at   | Moxd1 | monooxygenase, DBH-like 1                     | NM_021509 | 4.1239 | 12.6949 | -8.5710 |
| 1435190_at   | Chl1  | cell adhesion molecule with homology to L1CAM | BB378591  | 3.8732 | 12.5184 | -8.6452 |
| 1433532_a_at | Mbp   | myelin basic protein                          | AI323506  | 4.1952 | 12.9431 | -8.7479 |
|              |       |                                               |           |        |         |         |
|              |       |                                               |           |        |         |         |

**Comparison of gene expression between glioma cells M7 and GL26A1 cells (Affymetrix Gene Chip Data)**

| Affymetrix Probe identifier | Gene Symbol   | Description                                                                      | GenBank   | M7 expression | GL26A1 expression | Fold Change (log <sub>2</sub> ) |
|-----------------------------|---------------|----------------------------------------------------------------------------------|-----------|---------------|-------------------|---------------------------------|
| 1448754_at                  | Rbp1          | retinol binding protein 1, cellular                                              | NM_011254 | 11.9324       | 3.1988            | 8.7337                          |
| 1427262_at                  | Xist          | inactive X specific transcripts                                                  | L04961    | 11.2747       | 2.7387            | 8.5360                          |
| 1448182_a_at                | Cd24a         | CD24a antigen                                                                    | NM_009846 | 11.2867       | 2.8350            | 8.4517                          |
| 1430700_a_at                | Pla2g7        | phospholipase A2, group VII (platelet-activating factor acetylhydrolase, plasma) | AK005158  | 11.3513       | 3.2854            | 8.0659                          |
| 1448162_at                  | Vcam1         | vascular cell adhesion molecule 1                                                | BB250384  | 11.6707       | 3.6970            | 7.9738                          |
| 1424254_at                  | Ifitm1        | interferon induced transmembrane protein 1                                       | BC027285  | 12.2968       | 4.3610            | 7.9358                          |
| 1416072_at                  | Cd34          | CD34 antigen                                                                     | NM_133654 | 11.3653       | 3.4443            | 7.9211                          |
| 1427183_at                  | Efemp1        | epidermal growth factor-containing fibulin-like extracellular matrix protein 1   | BC023060  | 10.5180       | 2.7852            | 7.7328                          |
| 1416953_at                  | Ctgf          | connective tissue growth factor                                                  | NM_010217 | 11.7358       | 4.0994            | 7.6364                          |
| 1424800_at                  | Enah          | enabled homolog (Drosophila)                                                     | BQ044016  | 10.6460       | 3.0227            | 7.6233                          |
| 1456475_s_at                | Prkar2b       | protein kinase, cAMP dependent regulatory, type II beta                          | BB216074  | 10.3735       | 2.7744            | 7.5990                          |
| 1448961_at                  | Plscr2        | phospholipid scramblase 2                                                        | NM_008880 | 9.8895        | 2.3893            | 7.5001                          |
| 1418203_at                  | Pmaip1        | phorbol-12-myristate-13-acetate-induced protein 1                                | NM_021451 | 10.1483       | 2.7744            | 7.3739                          |
| 1433694_at                  | Pde3b         | phosphodiesterase 3B, cGMP-inhibited                                             | AV270888  | 11.0081       | 3.8342            | 7.1739                          |
| 1416034_at                  | Cd24a         | CD24a antigen                                                                    | NM_009846 | 10.5012       | 3.4714            | 7.0298                          |
| 1456174_x_at                | Ndrp1         | N-myc downstream regulated gene 1                                                | AV309418  | 11.0931       | 4.1035            | 6.9896                          |
| 1453282_at                  | Cxadr         | coxsackie virus and adenovirus receptor                                          | BE824924  | 9.6261        | 2.6565            | 6.9696                          |
| 1437502_x_at                | Cd24a         | CD24a antigen                                                                    | BB560574  | 9.5990        | 2.6488            | 6.9503                          |
| 1417262_at                  | Ptgs2         | prostaglandin-endoperoxide synthase 2                                            | M94967    | 11.3593       | 4.4363            | 6.9230                          |
| 1436448_a_at                | Ptgs1         | prostaglandin-endoperoxide synthase 1                                            | AA833146  | 10.1787       | 3.2854            | 6.8933                          |
| 1453317_a_at                | Khdrbs3       | KH domain containing, RNA binding, signal transduction associated 3              | AK014353  | 9.9713        | 3.0872            | 6.8841                          |
| 1438664_at                  | Prkar2b       | protein kinase, cAMP dependent regulatory, type II beta                          | BB216074  | 9.6444        | 2.8214            | 6.8229                          |
| 1421811_at                  | Thbs1         | thrombospondin 1                                                                 | AI385532  | 10.4176       | 3.6232            | 6.7944                          |
| 1423259_at                  | Id4           | inhibitor of DNA binding 4                                                       | BB121406  | 9.6991        | 2.9592            | 6.7399                          |
| 1436936_s_at                | Xist          | inactive X specific transcripts                                                  | BG806300  | 11.6030       | 4.8719            | 6.7312                          |
| 1448169_at                  | Krt18         | keratin 18                                                                       | NM_010664 | 10.8594       | 4.1689            | 6.6905                          |
| 1426622_a_at                | Qpct          | glutamyl-peptide cyclotransferase (glutamyl cyclase)                             | BB150720  | 9.4366        | 2.7744            | 6.6622                          |
| 1453275_at                  | 2310002L13Rik | RIKEN cDNA 2310002L13 gene                                                       | AK009098  | 9.5985        | 2.9592            | 6.6393                          |
| 1427263_at                  | Xist          | inactive X specific transcripts                                                  | L04961    | 10.7077       | 4.1000            | 6.6077                          |
| 1455627_at                  | Col8a1        | collagen, type VIII, alpha 1                                                     | AV292255  | 11.4760       | 4.8719            | 6.6041                          |
| 1417263_at                  | Ptgs2         | prostaglandin-endoperoxide synthase 2                                            | M94967    | 9.8853        | 3.3003            | 6.5849                          |
| 1420624_a_at                | Vamp8         | vesicle-associated membrane protein 8                                            | NM_016794 | 10.2295       | 3.6503            | 6.5791                          |
| 1449314_at                  | Zfpn2         | zinc finger protein, multitype 2                                                 | NM_011766 | 9.9496        | 3.3762            | 6.5734                          |
| 1425964_x_at                | Hspb1         | heat shock protein 1                                                             | U03561    | 11.9221       | 5.3765            | 6.5456                          |
| 1449254_at                  | Spp1          | secreted phosphoprotein 1                                                        | NM_009263 | 12.8838       | 6.5268            | 6.3570                          |
| 1424051_at                  | Col4a2        | collagen, type IV, alpha 2                                                       | BC013560  | 10.5889       | 4.2333            | 6.3555                          |
| 1422943_a_at                | Hspb1         | heat shock protein 1                                                             | NM_013560 | 12.3877       | 6.0489            | 6.3388                          |
| 1420992_at                  | Ankrd1        | ankyrin repeat domain 1 (cardiac muscle)                                         | AK009959  | 9.7801        | 3.4443            | 6.3358                          |
| 1428804_at                  | Mfap3l        | microfibrillar-associated protein 3-like                                         | AK017269  | 9.8742        | 3.5815            | 6.2927                          |
| 1460419_a_at                | Prkcb         | protein kinase C, beta                                                           | X59274    | 9.6599        | 3.3762            | 6.2838                          |
| 1457042_at                  | AI256396      | EST AI256396                                                                     | BB328287  | 9.2221        | 2.9592            | 6.2629                          |
| 1419086_at                  | Fgfbp1        | fibroblast growth factor binding protein 1                                       | U49641    | 10.2979       | 4.0927            | 6.2052                          |
| 1439766_x_at                | Vegfc         | vascular endothelial growth factor C                                             | BB089170  | 8.5104        | 2.3456            | 6.1648                          |
| 1452035_at                  | Col4a1        | collagen, type IV, alpha 1                                                       | BF158638  | 11.9677       | 5.8877            | 6.0800                          |
| 1449203_at                  | Slco1a5       | solute carrier organic anion transporter family, member 1a5                      | NM_130861 | 9.8406        | 3.7657            | 6.0749                          |
| 1420991_at                  | Ankrd1        | ankyrin repeat domain 1 (cardiac muscle)                                         | AK009959  | 9.5299        | 3.4650            | 6.0649                          |
| 1437360_at                  | Pcdh19        | protocadherin 19                                                                 | BB053591  | 10.2166       | 4.1689            | 6.0477                          |
| 1433474_at                  | Edil3         | EGF-like repeats and discoidin I-like domains 3                                  | BB377340  | 8.7547        | 2.7149            | 6.0398                          |

|              |               |                                                                                        |           |         |        |        |
|--------------|---------------|----------------------------------------------------------------------------------------|-----------|---------|--------|--------|
| 1426910_at   | Pawr          | PRKC, apoptosis, WT1, regulator                                                        | BB398886  | 10.2616 | 4.2333 | 6.0282 |
| 1447774_x_at | 5730469M10Rik | RIKEN cDNA 5730469M10 gene                                                             | AV332575  | 8.9817  | 2.9592 | 6.0225 |
| 1459679_s_at | Myo1b         | myosin IB                                                                              | AA406997  | 9.6277  | 3.6077 | 6.0201 |
| 1419309_at   | Pdpm          | podoplanin                                                                             | NM_010329 | 10.2286 | 4.2333 | 5.9953 |
| 1448990_a_at | Myo1b         | myosin IB                                                                              | AI255256  | 9.4993  | 3.5226 | 5.9767 |
| 1434442_at   | Stbd1         | starch binding domain 1                                                                | BB667844  | 9.0880  | 3.1525 | 5.9355 |
| 1422317_a_at | Il1rl1        | interleukin 1 receptor-like 1                                                          | NM_010743 | 10.3658 | 4.4400 | 5.9258 |
| 1436729_at   | Afap1         | actin filament associated protein 1                                                    | AV328634  | 9.2018  | 3.2854 | 5.9164 |
| 1424659_at   | Slit2         | slit homolog 2 (Drosophila)                                                            | BG963150  | 9.5009  | 3.6113 | 5.8896 |
| 1423413_at   | Ndrp1         | N-myc downstream regulated gene 1                                                      | AI987929  | 8.7622  | 2.8966 | 5.8657 |
| 1452740_at   | Myh10         | myosin, heavy polypeptide 10, non-muscle                                               | BQ176159  | 9.8343  | 3.9701 | 5.8642 |
| 1437453_s_at | Pcsk9         | proprotein convertase subtilisin/kexin type 9                                          | AV010795  | 9.9135  | 4.0507 | 5.8628 |
| 1420380_at   | Ccl2          | chemokine (C-C motif) ligand 2                                                         | AF065933  | 10.8318 | 5.0321 | 5.7997 |
| 1449865_at   | Sema3a        | sema domain, immunoglobulin domain (Ig), short basic domain, secreted, (semaphorin) 3A | NM_009152 | 9.2677  | 3.4978 | 5.7698 |
| 1419209_at   | Cxcl1         | chemokine (C-X-C motif) ligand 1                                                       | NM_008176 | 9.6688  | 3.9024 | 5.7663 |
| 1432331_a_at | Prrx2         | paired related homeobox 2                                                              | AK019971  | 8.8554  | 3.1413 | 5.7141 |
| 1424759_at   | Arndc4        | arrestin domain containing 4                                                           | BC017528  | 9.0765  | 3.3762 | 5.7003 |
| 1424890_at   | Bnc1          | basonuclin 1                                                                           | U88064    | 8.4060  | 2.7280 | 5.6780 |
| 1455145_at   | Pcdh19        | protocadherin 19                                                                       | BM115577  | 9.6991  | 4.0372 | 5.6619 |
| 1436194_at   | Prelid2       | PRELI domain containing 2                                                              | BE985366  | 9.4836  | 3.8342 | 5.6493 |
| 1423407_a_at | Fbln2         | fibulin 2                                                                              | BF228318  | 9.8358  | 4.2333 | 5.6025 |
| 1452716_at   | 5730469M10Rik | RIKEN cDNA 5730469M10 gene                                                             | AK017688  | 10.9728 | 5.3847 | 5.5880 |
| 1448925_at   | Twist2        | twist homolog 2 (Drosophila)                                                           | NM_007855 | 9.6841  | 4.1035 | 5.5806 |
| 1419431_at   | Ereg          | epiregulin                                                                             | NM_007950 | 8.7081  | 3.1525 | 5.5556 |
| 1447364_x_at | Myo1b         | myosin IB                                                                              | AA406997  | 8.7681  | 3.2215 | 5.5465 |
| 1428572_at   | Basp1         | brain abundant, membrane attached signal protein 1                                     | AK011545  | 10.6935 | 5.1519 | 5.5416 |
| 1420416_at   | Sema3a        | sema domain, immunoglobulin domain (Ig), short basic domain, secreted, (semaphorin) 3A | NM_009152 | 8.9806  | 3.4443 | 5.5364 |
| 1451501_a_at | Ghr           | growth hormone receptor                                                                | BC024375  | 11.6290 | 6.0989 | 5.5301 |
| 1449133_at   | Sprp1a        | small proline-rich protein 1A                                                          | NM_009264 | 9.1969  | 3.7438 | 5.4531 |
| 1423635_at   | Bmp2          | bone morphogenetic protein 2                                                           | AV239587  | 8.3322  | 2.8966 | 5.4356 |
| 1420760_s_at | Ndrp1         | N-myc downstream regulated gene 1                                                      | NM_008681 | 10.7821 | 5.4108 | 5.3712 |
| 1454788_at   | Arl4c         | ADP-ribosylation factor-like 4C                                                        | BQ176306  | 10.7358 | 5.3765 | 5.3593 |
| 1419123_a_at | Pdgfc         | platelet-derived growth factor, C polypeptide                                          | NM_019971 | 8.7250  | 3.3762 | 5.3489 |
| 1426951_at   | Crim1         | cysteine rich transmembrane BMP regulator 1 (chordin like)                             | AK018666  | 8.5656  | 3.2186 | 5.3470 |
| 1423414_at   | Ptgs1         | prostaglandin-endoperoxide synthase 1                                                  | BB520073  | 9.6410  | 4.2966 | 5.3443 |
| 1455096_at   | Flrt2         | leucine-rich repeats and immunoglobulin-like domains 2                                 | AW555664  | 8.2314  | 2.8966 | 5.3349 |
| 1449893_a_at | Lrig1         | leucine-rich repeats and immunoglobulin-like domains 1                                 | NM_008377 | 9.5002  | 4.1689 | 5.3313 |
| 1426865_a_at | Ncam1         | neural cell adhesion molecule 1                                                        | BB698413  | 8.5458  | 3.2186 | 5.3272 |
| 1456858_at   | Gpr149        | G protein-coupled receptor 149                                                         | BB075339  | 8.1215  | 2.8122 | 5.3093 |
| 1459713_s_at | Ano1          | anoctamin 1, calcium activated chloride channel                                        | AU040576  | 10.3930 | 5.0970 | 5.2960 |
| 1428114_at   | Slc14a1       | solute carrier family 14 (urea transporter), member 1                                  | AW556396  | 8.6683  | 3.3762 | 5.2921 |
| 1426348_at   | Col4a1        | collagen, type IV, alpha 1                                                             | BF158638  | 9.6316  | 4.3588 | 5.2728 |
| 1416159_at   | Nr2f2         | nuclear receptor subfamily 2, group F, member 2                                        | AI463873  | 9.8053  | 4.5566 | 5.2487 |
| 1433795_at   | Tgfb3         | transforming growth factor, beta receptor III                                          | BM122301  | 9.5331  | 4.2966 | 5.2365 |
| 1447643_x_at | Snai2         | snail homolog 2 (Drosophila)                                                           | BB040443  | 9.3209  | 4.1035 | 5.2175 |
| 1437190_at   | Styk1         | serine/threonine/tyrosine kinase 1                                                     | AV375472  | 9.1846  | 3.9701 | 5.2145 |
| 1417962_s_at | Ghr           | growth hormone receptor                                                                | NM_010284 | 12.1145 | 6.9244 | 5.1900 |
| 1434280_at   |               |                                                                                        | BG976607  | 11.4138 | 6.2392 | 5.1746 |
| 1420514_at   | Tmem47        | transmembrane protein 47                                                               | NM_138751 | 7.7663  | 2.6140 | 5.1522 |
| 1419186_a_at | St8sia4       | ST8 alpha-N-acetyl-neuraminide alpha-2,8-sialyltransferase 4                           | NM_009183 | 8.4201  | 3.2854 | 5.1347 |
| 1440397_at   | Cacna2d1      | calcium channel, voltage-dependent, alpha2/delta subunit 1                             | BB464523  | 7.9091  | 2.7744 | 5.1347 |
| 1422706_at   | Pmepa1        | prostate transmembrane protein, androgen induced 1                                     | AV370981  | 10.8574 | 5.7245 | 5.1329 |
| 1438659_x_at | Chchd6        | coiled-coil-helix-coiled-coil-helix domain containing 6                                | BB458460  | 7.7877  | 2.6565 | 5.1312 |
| 1417023_a_at | Fabp4         | fatty acid binding protein 4, adipocyte                                                | NM_024406 | 8.3497  | 3.2186 | 5.1310 |
| 1449147_at   | Chst1         | carbohydrate (keratan sulfate Gal-6) sulfotransferase 1                                | NM_023850 | 9.8513  | 4.7207 | 5.1306 |
| 1434340_at   | Uqcrl0        | ubiquinol-cytochrome c reductase, complex III subunit X                                | BF681728  | 9.3485  | 4.2333 | 5.1151 |
| 1429893_at   | Il17rd        | interleukin 17 receptor D                                                              | AK012666  | 8.3971  | 3.2854 | 5.1117 |

|              |         |                                                                                                                                 |           |         |        |        |
|--------------|---------|---------------------------------------------------------------------------------------------------------------------------------|-----------|---------|--------|--------|
| 1425145_at   | Il1rl1  | interleukin 1 receptor-like 1                                                                                                   | D13695    | 9.6003  | 4.4990 | 5.1013 |
| 1441927_at   | Syt7    | synaptotagmin VII                                                                                                               | AV138438  | 8.8894  | 3.8342 | 5.0552 |
| 1436200_at   | Lonrf3  | LON peptidase N-terminal domain and ring finger 3                                                                               | BE956940  | 9.1870  | 4.1407 | 5.0463 |
| 1422437_at   | Col5a2  | collagen, type V, alpha 2                                                                                                       | AV229424  | 9.2140  | 4.1689 | 5.0451 |
| 1424950_at   | Sox9    | SRY-box containing gene 9                                                                                                       | BC024958  | 8.4133  | 3.3762 | 5.0371 |
| 1424967_x_at | Tnnt2   | troponin T2, cardiac                                                                                                            | L47552    | 10.9178 | 5.8877 | 5.0300 |
| 1419417_at   | Vegfc   | vascular endothelial growth factor C                                                                                            | NM_009506 | 7.9141  | 2.8966 | 5.0176 |
| 1455223_at   | Igf2bp1 | insulin-like growth factor 2 mRNA binding protein 1                                                                             | BB794657  | 8.2848  | 3.2821 | 5.0028 |
| 1434873_a_at | Acap1   | ArfGAP with coiled-coil, ankyrin repeat and PH domains 1                                                                        | BB115902  | 9.7031  | 4.7004 | 5.0027 |
| 1415989_at   | Vcam1   | vascular cell adhesion molecule 1                                                                                               | BB250384  | 10.3399 | 5.3414 | 4.9985 |
| 1418910_at   | Bmp7    | bone morphogenetic protein 7                                                                                                    | NM_007557 | 8.5618  | 3.5815 | 4.9803 |
| 1460081_at   | Syt7    | synaptotagmin VII                                                                                                               | AI854420  | 8.6567  | 3.6834 | 4.9733 |
| 1419639_at   | Efnb2   | ephrin B2                                                                                                                       | U30244    | 7.8411  | 2.8966 | 4.9446 |
| 1426127_x_at | Klra18  | killer cell lectin-like receptor, subfamily A, member 18                                                                        | AF288377  | 11.0902 | 6.1607 | 4.9295 |
| 1421134_at   | Areg    | amphiregulin                                                                                                                    | NM_009704 | 10.5867 | 5.6689 | 4.9178 |
| 1419638_at   | Efnb2   | ephrin B2                                                                                                                       | U30244    | 7.8527  | 2.9592 | 4.8936 |
| 1444302_at   | GxyIt2  | glucoside xylosyltransferase 2                                                                                                  | AV278332  | 9.4427  | 4.5568 | 4.8859 |
| 1416158_at   | Nr2f2   | nuclear receptor subfamily 2, group F, member 2                                                                                 | AI463873  | 7.3970  | 2.5429 | 4.8540 |
| 1419184_a_at | Fhl2    | four and a half LIM domains 2                                                                                                   | NM_010212 | 10.7377 | 5.8953 | 4.8424 |
| 1449070_x_at | Apcdd1  | adenomatosis polyposis coli down-regulated 1                                                                                    | BB770932  | 8.1810  | 3.3762 | 4.8048 |
| 1422053_at   | Inhba   | inhibin beta-A                                                                                                                  | NM_008380 | 10.4863 | 5.6929 | 4.7935 |
| 1424826_s_at | Mtss1   | metastasis suppressor 1                                                                                                         | BC024131  | 8.7309  | 3.9517 | 4.7792 |
| 1418440_at   | Col8a1  | collagen, type VIII, alpha 1                                                                                                    | NM_007739 | 10.0833 | 5.3078 | 4.7755 |
| 1418726_a_at | Tnnt2   | troponin T2, cardiac                                                                                                            | NM_011619 | 11.0835 | 6.3197 | 4.7638 |
| 1438210_at   | Gpr149  | G protein-coupled receptor 149                                                                                                  | BB126999  | 7.6590  | 2.8966 | 4.7625 |
| 1418478_at   | Lmo1    | LIM domain only 1                                                                                                               | NM_057173 | 9.5234  | 4.7725 | 4.7508 |
| 1421979_at   | Phex    | phosphate regulating gene with homologies to endopeptidases on the X chromosome (hypophosphatemia, vitamin D resistant rickets) | U73910    | 8.4466  | 3.6970 | 4.7496 |
| 1426300_at   | Alcam   | activated leukocyte cell adhesion molecule                                                                                      | U95030    | 10.3025 | 5.5594 | 4.7431 |
| 1423478_at   | Prkcb   | protein kinase C, beta                                                                                                          | BF660388  | 8.1851  | 3.4443 | 4.7408 |
| 1425039_at   | Itgbl1  | integrin, beta-like 1                                                                                                           | BC020152  | 8.2458  | 3.5127 | 4.7330 |
| 1438353_at   |         |                                                                                                                                 | AW543049  | 10.6911 | 5.9590 | 4.7320 |
| 1460238_at   | Msln    | mesothelin                                                                                                                      | NM_018857 | 8.5598  | 3.8282 | 4.7316 |
| 1422788_at   | Slc43a3 | solute carrier family 43, member 3                                                                                              | NM_021398 | 8.0327  | 3.3026 | 4.7302 |
| 1451538_at   | Sox9    | SRY-box containing gene 9                                                                                                       | BC024958  | 9.2365  | 4.5121 | 4.7244 |
| 1439397_at   | Fmn1    | formin 1                                                                                                                        | BB164513  | 8.2204  | 3.5127 | 4.7077 |
| 1447839_x_at | Adm     | adrenomedullin                                                                                                                  | AV378441  | 9.7676  | 5.0750 | 4.6926 |
| 1440739_at   | Vegfc   | vascular endothelial growth factor C                                                                                            | AW228853  | 7.7133  | 3.0227 | 4.6906 |
| 1445720_at   | Sltm    | SAFB-like, transcription modulator                                                                                              | BB206801  | 9.7384  | 5.0544 | 4.6840 |
| 1419717_at   | Sema3e  | sema domain, immunoglobulin domain (Ig), short basic domain, secreted, (semaphorin) 3E                                          | NM_011348 | 8.3585  | 3.6795 | 4.6790 |
| 1455647_at   | Ar      | androgen receptor                                                                                                               | BB148302  | 8.3638  | 3.6970 | 4.6668 |
| 1451780_at   | Blnk    | B cell linker                                                                                                                   | AF068182  | 8.5636  | 3.9024 | 4.6612 |
| 1434210_s_at | Lrig1   | leucine-rich repeats and immunoglobulin-like domains 1                                                                          | AV174595  | 9.9923  | 5.3414 | 4.6509 |
| 1416382_at   | Ctsc    | cathepsin C                                                                                                                     | NM_009982 | 7.6683  | 3.0227 | 4.6456 |
| 1424885_at   | Klhc8a  | kelch domain containing 8A                                                                                                      | BC011135  | 8.4661  | 3.8228 | 4.6433 |
| 1430640_a_at | Prkar2b | protein kinase, cAMP dependent regulatory, type II beta                                                                         | BI695530  | 7.6476  | 3.0227 | 4.6249 |
| 1449586_at   | Pkp1    | plakophilin 1                                                                                                                   | NM_019645 | 8.1283  | 3.5127 | 4.6155 |
| 1416805_at   | Fam198b | family with sequence similarity 198, member B                                                                                   | NM_133187 | 7.5666  | 2.9592 | 4.6074 |
| 1426301_at   | Alcam   | activated leukocyte cell adhesion molecule                                                                                      | U95030    | 9.8881  | 5.3054 | 4.5827 |
| 1416077_at   | Adm     | adrenomedullin                                                                                                                  | NM_009627 | 9.4011  | 4.8229 | 4.5782 |
| 1449252_at   | Fam110c | family with sequence similarity 110, member C                                                                                   | NM_027828 | 8.8723  | 4.2966 | 4.5757 |
| 1428647_at   | Pbx1    | pre B cell leukemia homeobox 1                                                                                                  | BG070361  | 10.3625 | 5.7908 | 4.5718 |
| 1436970_a_at | Pdgfrb  | platelet derived growth factor receptor, beta polypeptide                                                                       | AA499047  | 8.9244  | 4.3588 | 4.5657 |
| 1442226_at   | Sema3e  | sema domain, immunoglobulin domain (Ig), short basic domain, secreted, (semaphorin) 3E                                          | AV348197  | 7.9307  | 3.3762 | 4.5545 |
| 1457424_at   | Eya1    | eyes absent 1 homolog (Drosophila)                                                                                              | BB760085  | 8.2709  | 3.7192 | 4.5517 |
| 1454822_x_at | Apcdd1  | adenomatosis polyposis coli down-regulated 1                                                                                    | BB271021  | 8.1032  | 3.5592 | 4.5440 |
| 1434678_at   | Mbnl3   | muscleblind-like 3 (Drosophila)                                                                                                 | AV306759  | 7.7264  | 3.2186 | 4.5078 |
| 1427671_a_at | Fmn1    | formin 1                                                                                                                        | X62379    | 8.5770  | 4.0805 | 4.4964 |
| 1428393_at   | Nrn1    | neuritin 1                                                                                                                      | AK003046  | 8.7234  | 4.2333 | 4.4901 |

|              |               |                                                                          |           |         |        |        |
|--------------|---------------|--------------------------------------------------------------------------|-----------|---------|--------|--------|
| 1427450_x_at | Myo1b         | myosin IB                                                                | BI080370  | 9.3596  | 4.8719 | 4.4877 |
| 1417817_a_at | Wwtr1         | WW domain containing transcription regulator 1                           | BC014727  | 12.8617 | 8.3774 | 4.4843 |
| 1450924_at   | Hdgfrp3       | hepatoma-derived growth factor, related protein 3                        | BB291880  | 7.0755  | 2.5992 | 4.4763 |
| 1416299_at   | Shcbp1        | Shc SH2-domain binding protein 1                                         | NM_011369 | 10.4914 | 6.0300 | 4.4614 |
| 1458236_at   |               |                                                                          | BB657751  | 7.4682  | 3.0227 | 4.4455 |
| 1426649_at   |               |                                                                          | BM114154  | 8.2794  | 3.8342 | 4.4451 |
| 1434036_at   | Mtss1         | metastasis suppressor 1                                                  | AV024771  | 9.7497  | 5.3054 | 4.4443 |
| 1421840_at   | Abca1         | ATP-binding cassette, sub-family A (ABC1), member 1                      | BB144704  | 8.3816  | 3.9701 | 4.4115 |
| 1423281_at   | Stmn2         | stathmin-like 2                                                          | BM115022  | 7.9101  | 3.5127 | 4.3974 |
| 1428405_at   | Hcfc1r1       | hepatocellular carcinoma factor 1 (APO1-dependent)                       | BF580567  | 12.2775 | 7.8810 | 4.3965 |
| 1448931_at   | F2r1          | coagulation factor II (thrombin) receptor-like 1                         | NM_007974 | 8.2276  | 3.8342 | 4.3933 |
| 1447693_s_at | Neo1          | neogenin                                                                 | BB350308  | 9.2100  | 4.8229 | 4.3871 |
| 1450976_at   | Ndrp1         | N-myc downstream regulated gene 1                                        | AI987929  | 9.6472  | 5.2685 | 4.3787 |
| 1418761_at   | Igf2bp1       | insulin-like growth factor 2 mRNA binding protein 1                      | BB499476  | 8.9160  | 4.5561 | 4.3599 |
| 1459838_s_at | Btbd11        | BTB (POZ) domain containing 11                                           | BB230894  | 8.3184  | 3.9701 | 4.3482 |
| 1437155_a_at | Wwtr1         | WW domain containing transcription regulator 1                           | BG066193  | 12.6463 | 8.2986 | 4.3477 |
| 1418879_at   | Fam110c       | family with sequence similarity 110, member C                            | NM_027828 | 9.8037  | 5.4771 | 4.3266 |
| 1416830_at   | 0610031J06Rik | RIKEN cDNA 0610031J06 gene                                               | NM_020003 | 10.2935 | 5.9685 | 4.3250 |
| 1422603_at   | Rnase4        | ribonuclease, RNase A family 4                                           | BC005569  | 7.5417  | 3.2186 | 4.3231 |
| 1429846_at   | 9030411K21Rik | RIKEN cDNA 9030411K21 gene                                               | BM250766  | 9.7969  | 5.4771 | 4.3198 |
| 1447819_x_at | Col8a1        | collagen, type VIII, alpha 1                                             | BB546487  | 10.3368 | 6.0270 | 4.3098 |
| 1451314_a_at | Vcam1         | vascular cell adhesion molecule 1                                        | L08431    | 9.3185  | 5.0107 | 4.3078 |
| 1451270_at   | Dusp18        | dual specificity phosphatase 18                                          | BC020036  | 8.8105  | 4.5061 | 4.3043 |
| 1452952_at   | 9030418K01Rik | RIKEN cDNA 9030418K01 gene                                               | AK018518  | 8.3661  | 4.0795 | 4.2866 |
| 1443771_x_at | Smad7         | SMAD family member 7                                                     | BB241324  | 7.7958  | 3.5127 | 4.2830 |
| 1416749_at   | Htra1         | HtrA serine peptidase 1                                                  | NM_019564 | 11.2786 | 6.9996 | 4.2789 |
| 1451263_a_at | Fabp4         | fatty acid binding protein 4, adipocyte                                  | BC002148  | 6.9291  | 2.6565 | 4.2726 |
| 1428406_s_at | Hcfc1r1       | hepatocellular carcinoma factor 1 (APO1-dependent)                       | BF580567  | 10.9687 | 6.7105 | 4.2582 |
| 1430792_at   |               |                                                                          | AK014334  | 7.6284  | 3.3762 | 4.2523 |
| 1424595_at   | F11r          | F11 receptor                                                             | BC021876  | 9.2140  | 4.9657 | 4.2483 |
| 1452092_at   | Chst15        | carbohydrate (N-acetylgalactosamine 4-sulfate 6-O) sulfotransferase 15   | AK019474  | 7.5173  | 3.2854 | 4.2319 |
| 1422705_at   | Pmepa1        | prostate transmembrane protein, androgen induced 1                       | AV370981  | 8.7788  | 4.5566 | 4.2222 |
| 1429863_at   | Lonrf3        | LON peptidase N-terminal domain and ring finger 3                        | AK016522  | 7.7949  | 3.5815 | 4.2134 |
| 1453139_at   | Nudt12        | nudix (nucleoside diphosphate linked moiety X)-type motif 12             | AK018117  | 6.4959  | 2.2944 | 4.2015 |
| 1450928_at   | Id4           | inhibitor of DNA binding 4                                               | BB121406  | 7.3461  | 3.1525 | 4.1936 |
| 1439153_at   | Rnf144b       | ring finger protein 144B                                                 | AV274826  | 9.0631  | 4.8719 | 4.1912 |
| 1426942_at   | Aim1          | absent in melanoma 1                                                     | BM233292  | 6.9605  | 2.7744 | 4.1861 |
| 1436475_at   | Nr2f2         | nuclear receptor subfamily 2, group F, member 2                          | AI527205  | 8.0923  | 3.9117 | 4.1805 |
| 1417156_at   | Krt19         | keratin 19                                                               | NM_008471 | 8.7864  | 4.6127 | 4.1737 |
| 1437466_at   | Alcam         | activated leukocyte cell adhesion molecule                               | AV315205  | 8.4671  | 4.2966 | 4.1705 |
| 1418569_at   | Fblim1        | filamin binding LIM protein 1                                            | BG070068  | 10.0082 | 5.8382 | 4.1700 |
| 1449210_at   | Igf2bp1       | insulin-like growth factor 2 mRNA binding protein 1                      | BB499476  | 7.8572  | 3.6970 | 4.1602 |
| 1450065_at   | Adcy7         | adenylate cyclase 7                                                      | NM_007406 | 8.6578  | 4.4990 | 4.1588 |
| 1443426_at   | Sltm          | SAFB-like, transcription modulator                                       | BB425367  | 9.0388  | 4.8848 | 4.1541 |
| 1437467_at   | Alcam         | activated leukocyte cell adhesion molecule                               | AV315205  | 9.2464  | 5.0970 | 4.1495 |
| 1434115_at   | Cdh13         | cadherin 13                                                              | BQ176681  | 9.0210  | 4.8719 | 4.1491 |
| 1448468_a_at | Kcnab1        | potassium voltage-gated channel, shaker-related subfamily, beta member 1 | AF033003  | 8.6837  | 4.5368 | 4.1470 |
| 1422139_at   | Plau          | plasminogen activator, urokinase                                         | NM_008873 | 7.2317  | 3.0872 | 4.1446 |
| 1435640_x_at | A130040M12Rik | RIKEN cDNA A130040M12 gene                                               | BE634869  | 8.2371  | 4.0956 | 4.1415 |
| 1436590_at   | Ppp1r3b       | protein phosphatase 1, regulatory (inhibitor) subunit 3B                 | BG071940  | 7.5840  | 3.4443 | 4.1398 |
| 1435493_at   | Dsp           | desmoplakin                                                              | AV297961  | 7.0967  | 2.9592 | 4.1376 |
| 1453238_s_at |               |                                                                          | AU018141  | 12.7838 | 8.6518 | 4.1320 |
| 1421151_a_at | Epha2         | Eph receptor A2                                                          | NM_010139 | 10.6140 | 6.4898 | 4.1241 |
| 1424250_a_at | Arhgef3       | rho guanine nucleotide exchange factor (GEF) 3                           | BC012262  | 7.1434  | 3.0227 | 4.1207 |
| 1429089_s_at | 2900026A02Rik | RIKEN cDNA 2900026A02 gene                                               | BG063749  | 8.4156  | 4.2966 | 4.1190 |
| 1423062_at   | Igfbp3        | insulin-like growth factor binding protein 3                             | AV175389  | 7.0702  | 2.9592 | 4.1111 |
| 1435088_at   | Nsd1          | nuclear receptor-binding SET-domain protein 1                            | BM945177  | 7.7606  | 3.6503 | 4.1102 |
| 1434754_at   | Rap1gap2      | RAP1 GTPase activating protein 2                                         | AU067654  | 8.1411  | 4.0372 | 4.1039 |
| 1450414_at   | Pdgfb         | platelet derived growth factor, B polypeptide                            | BC023427  | 8.1311  | 4.0404 | 4.0907 |

|              |               |                                                                                        |           |         |        |        |
|--------------|---------------|----------------------------------------------------------------------------------------|-----------|---------|--------|--------|
| 1457644_s_at | Cxcl1         | chemokine (C-X-C motif) ligand 1                                                       | BB554288  | 10.4711 | 6.3902 | 4.0809 |
| 1460330_at   | Anxa3         | annexin A3                                                                             | AW702161  | 12.3474 | 8.2755 | 4.0719 |
| 1424208_at   | Ptger4        | prostaglandin E receptor 4 (subtype EP4)                                               | BC011193  | 8.2997  | 4.2333 | 4.0664 |
| 1453771_at   | Gulp1         | GULP, engulfment adaptor PTB domain containing 1                                       | BF144687  | 7.3768  | 3.3156 | 4.0613 |
| 1449351_s_at | Pdgfc         | platelet-derived growth factor, C polypeptide                                          | NM_019971 | 7.7538  | 3.6970 | 4.0569 |
| 1433769_at   | Als2cl        | ALS2 C-terminal like                                                                   | BM201174  | 7.9021  | 3.8483 | 4.0539 |
| 1436329_at   | Egr3          | early growth response 3                                                                | AV346607  | 8.2266  | 4.1739 | 4.0527 |
| 1431057_a_at | Prss23        | protease, serine, 23                                                                   | AK009847  | 9.4624  | 5.4108 | 4.0515 |
| 1435494_s_at | Dsp           | desmoplakin                                                                            | AV297961  | 6.7038  | 2.6565 | 4.0473 |
| 1438861_at   | Bnc2          | basonuclin 2                                                                           | BB482899  | 8.5363  | 4.4990 | 4.0373 |
| 1435137_s_at |               |                                                                                        | BB119177  | 13.4251 | 9.3978 | 4.0273 |
| 1423104_at   | Irs1          | insulin receptor substrate 1                                                           | BB345784  | 11.8129 | 7.7979 | 4.0150 |
| 1434470_at   | Syt13         | synaptotagmin XIII                                                                     | BB244585  | 7.7805  | 3.7657 | 4.0148 |
| 1429053_at   | 1110012J17Rik | RIKEN cDNA 1110012J17 gene                                                             | BB795266  | 7.9966  | 3.9882 | 4.0084 |
| 1445882_at   | Cd300lb       | CD300 antigen like family member B                                                     | BB230267  | 6.9761  | 2.9703 | 4.0058 |
| 1437671_x_at | Prss23        | protease, serine, 23                                                                   | BB378796  | 10.0189 | 6.0139 | 4.0049 |
| 1436218_at   | Lgr6          | leucine-rich repeat-containing G protein-coupled receptor 6                            | AV337396  | 8.3541  | 4.3588 | 3.9953 |
| 1427932_s_at |               |                                                                                        | BI076834  | 13.5215 | 9.5298 | 3.9917 |
| 1419603_at   | Irf204        | interferon activated gene 204                                                          | NM_008329 | 7.4334  | 3.4443 | 3.9891 |
| 1440767_at   | Defb41        | defensin beta 41                                                                       | BB787829  | 6.9450  | 2.9592 | 3.9858 |
| 1420620_a_at | Rnf13         | ring finger protein 13                                                                 | NM_011883 | 11.3446 | 7.3659 | 3.9787 |
| 1458655_at   |               |                                                                                        | AU018221  | 8.8359  | 4.8705 | 3.9654 |
| 1416855_at   | Gas1          | growth arrest specific 1                                                               | BB550400  | 9.3956  | 5.4443 | 3.9513 |
| 1428909_at   | A130040M12Rik | RIKEN cDNA A130040M12 gene                                                             | C85657    | 11.0873 | 7.1485 | 3.9389 |
| 1417273_at   | Pdk4          | pyruvate dehydrogenase kinase, isoenzyme 4                                             | NM_013743 | 7.1636  | 3.2371 | 3.9265 |
| 1458802_at   | Hivep3        | human immunodeficiency virus type I enhancer binding protein 3                         | BB164127  | 8.2662  | 4.3588 | 3.9074 |
| 1433594_at   | Commd2        | COMM domain containing 2                                                               | BI412929  | 12.7362 | 8.8304 | 3.9058 |
| 1424801_at   | Enah          | enabled homolog (Drosophila)                                                           | BQ044016  | 8.2023  | 4.2966 | 3.9057 |
| 1456258_at   | Emx2          | empty spiracles homeobox 2                                                             | BG072869  | 6.6847  | 2.7794 | 3.9053 |
| 1449885_at   | Tmem47        | transmembrane protein 47                                                               | NM_138751 | 6.7422  | 2.8430 | 3.8992 |
| 1428377_at   | Btdb11        | BTB (POZ) domain containing 11                                                         | AK018115  | 7.3405  | 3.4443 | 3.8962 |
| 1452253_at   | Crim1         | cysteine rich transmembrane BMP regulator 1 (chordin like)                             | AK018666  | 6.3302  | 2.4513 | 3.8790 |
| 1435374_at   | Cdyl2         | chromodomain protein, Y chromosome-like 2                                              | BG071670  | 7.4584  | 3.5815 | 3.8770 |
| 1448411_at   | Wfs1          | Wolfram syndrome 1 homolog (human)                                                     | NM_011716 | 8.0401  | 4.1667 | 3.8733 |
| 1434931_at   | Neo1          | neogenin                                                                               | BB667778  | 9.5082  | 5.6386 | 3.8696 |
| 1418752_at   | Aldh3a1       | aldehyde dehydrogenase family 3, subfamily A1                                          | NM_007436 | 8.2709  | 4.4026 | 3.8683 |
| 1436512_at   | Arl4c         | ADP-ribosylation factor-like 4C                                                        | BI964400  | 9.8228  | 5.9590 | 3.8637 |
| 1438251_x_at | Htra1         | HtrA serine peptidase 1                                                                | BB559067  | 11.1967 | 7.3399 | 3.8567 |
| 1454974_at   | Ntn1          | netrin 1                                                                               | BI143915  | 7.7451  | 3.9024 | 3.8427 |
| 1437481_at   | Trmt61b       | tRNA methyltransferase 61 homolog B (S. cerevisiae)                                    | AV032349  | 7.4140  | 3.5815 | 3.8325 |
| 1418673_at   | Snai2         | snail homolog 2 (Drosophila)                                                           | NM_011415 | 7.4828  | 3.6503 | 3.8325 |
| 1428484_at   | Osbpl3        | oxysterol binding protein-like 3                                                       | AK004768  | 10.0289 | 6.2005 | 3.8285 |
| 1420498_a_at | Dab2          | disabled 2, mitogen-responsive phosphoprotein                                          | NM_023118 | 9.8745  | 6.0489 | 3.8256 |
| 1423551_at   | Cdh13         | cadherin 13                                                                            | BB776961  | 8.3759  | 4.5566 | 3.8194 |
| 1449141_at   | Fblim1        | filamin binding LIM protein 1                                                          | BG070068  | 9.8211  | 6.0047 | 3.8164 |
| 1437064_at   | Ar            | androgen receptor                                                                      | AV232123  | 8.0455  | 4.2333 | 3.8122 |
| 1457032_at   | Ak5           | adenylate kinase 5                                                                     | BB546359  | 8.5845  | 4.7725 | 3.8120 |
| 1456874_at   | Flrt2         | fibronectin leucine rich transmembrane protein 2                                       | BB817332  | 7.0755  | 3.2635 | 3.8120 |
| 1436100_at   | Sh2d5         | SH2 domain containing 5                                                                | AV347995  | 7.3168  | 3.5127 | 3.8040 |
| 1424588_at   | Srgap3        | SLIT-ROBO Rho GTPase activating protein 3                                              | AF481964  | 8.0985  | 4.2966 | 3.8019 |
| 1455340_at   | Dennd5b       | DENN/MADD domain containing 5B                                                         | BB763709  | 8.0964  | 4.2966 | 3.7997 |
| 1456683_at   | Sltm          | SAFB-like, transcription modulator                                                     | BM200011  | 9.5511  | 5.7538 | 3.7974 |
| 1448485_at   | Ggt1          | gamma-glutamyltransferase 1                                                            | NM_008116 | 7.5419  | 3.7657 | 3.7762 |
| 1438937_x_at |               |                                                                                        | AI385586  | 6.6275  | 2.8592 | 3.7684 |
| 1448989_a_at | Myo1b         | myosin IB                                                                              | AI255256  | 9.5715  | 5.8041 | 3.7674 |
| 1422760_at   | Padi4         | peptidyl arginine deiminase, type IV                                                   | NM_011061 | 7.7356  | 3.9701 | 3.7655 |
| 1451119_a_at | Fbln1         | fibulin 1                                                                              | BC007140  | 7.7295  | 3.9688 | 3.7607 |
| 1434092_at   | Atg9b         | autophagy related 9B                                                                   | AW121498  | 8.7241  | 4.9657 | 3.7583 |
| 1423304_a_at | Rnf111        | ring finger 111                                                                        | BB366842  | 12.4996 | 8.7444 | 3.7552 |
| 1427673_a_at | Sema3e        | sema domain, immunoglobulin domain (Ig), short basic domain, secreted, (semaphorin) 3E | Z93948    | 7.1487  | 3.3960 | 3.7528 |
| 1451827_a_at | Nox4          | NADPH oxidase 4                                                                        | BC021378  | 6.8354  | 3.0899 | 3.7455 |

|              |               |                                                                                        |           |         |        |        |
|--------------|---------------|----------------------------------------------------------------------------------------|-----------|---------|--------|--------|
| 1434341_x_at | Uqcr10        | ubiquinol-cytochrome c reductase, complex III subunit X                                | BF681728  | 9.1834  | 5.4443 | 3.7391 |
| 1454862_at   | Phldb2        | pleckstrin homology-like domain, family B, member 2                                    | AV253284  | 9.5734  | 5.8458 | 3.7276 |
| 1418736_at   | B3galnt1      | UDP-GalNAc:betaGlcNAc beta 1,3-galactosaminyltransferase, polypeptide 1                | BC003835  | 6.6810  | 2.9571 | 3.7239 |
| 1449164_at   | Cd68          | CD68 antigen                                                                           | BC021637  | 8.4914  | 4.7725 | 3.7188 |
| 1460431_at   | Gcnt1         | glucosaminyl (N-acetyl) transferase 1, core 2                                          | AK017462  | 6.8057  | 3.0872 | 3.7186 |
| 1417481_at   | Ramp1         | receptor (calcitonin) activity modifying protein 1                                     | NM_016894 | 8.9065  | 5.1918 | 3.7147 |
| 1422541_at   | Ptprm         | protein tyrosine phosphatase, receptor type, M                                         | NM_008984 | 7.5460  | 3.8342 | 3.7117 |
| 1446071_at   | Steap2        | six transmembrane epithelial antigen of prostate 2                                     | BB529332  | 7.5434  | 3.8342 | 3.7091 |
| 1439747_at   | Ptges         | prostaglandin E synthase                                                               | BB730139  | 8.4191  | 4.7207 | 3.6984 |
| 1437218_at   | Fn1           | fibronectin 1                                                                          | BM234360  | 6.6564  | 2.9592 | 3.6973 |
| 1427760_s_at |               |                                                                                        | X75557    | 10.0994 | 6.4073 | 3.6921 |
| 1434325_x_at | Prkar1b       | protein kinase, cAMP dependent regulatory, type I beta                                 | BB274009  | 10.3633 | 6.6801 | 3.6833 |
| 1419149_at   | Serpine1      | serine (or cysteine) peptidase inhibitor, clade E, member 1                            | NM_008871 | 10.3625 | 6.6801 | 3.6825 |
| 1443745_s_at | Dmp1          | dentin matrix protein 1                                                                | AV020965  | 6.3376  | 2.6565 | 3.6811 |
| 1416160_at   | Nr2f2         | nuclear receptor subfamily 2, group F, member 2                                        | AI463873  | 7.3254  | 3.6503 | 3.6751 |
| 1425383_a_at | Pbx1          | pre B cell leukemia homeobox 1                                                         | L27453    | 7.8300  | 4.1600 | 3.6700 |
| 1455795_at   | Dse           | dermatan sulfate epimerase                                                             | BM207218  | 6.1198  | 2.4513 | 3.6686 |
| 1424050_s_at | Fgfr1         | fibroblast growth factor receptor 1                                                    | M33760    | 10.1263 | 6.4802 | 3.6461 |
| 1428629_at   | Zfp518a       | zinc finger protein 518A                                                               | AK018187  | 6.2943  | 2.6565 | 3.6378 |
| 1452107_s_at | Npnt          | nephronectin                                                                           | AA223007  | 6.1807  | 2.5429 | 3.6378 |
| 1454745_at   | Arhgap29      | Rho GTPase activating protein 29                                                       | BG074320  | 9.4148  | 5.7781 | 3.6367 |
| 1450389_s_at | Pip5k1b       | phosphatidylinositol-4-phosphate 5-kinase, type 1 beta                                 | NM_008846 | 6.8531  | 3.2186 | 3.6345 |
| 1424303_at   | Depdc7        | DEP domain containing 7                                                                | BC013499  | 6.8523  | 3.2186 | 3.6337 |
| 1433845_x_at | Dusp9         | dual specificity phosphatase 9                                                         | AV295798  | 7.3506  | 3.7218 | 3.6288 |
| 1438702_at   | Flrt2         | fibronectin type III transmembrane protein 2                                           | BG075699  | 8.3989  | 4.7725 | 3.6264 |
| 1423278_at   | Ptprk         | protein tyrosine phosphatase, receptor type, K                                         | AI893646  | 7.4014  | 3.7794 | 3.6220 |
| 1425918_at   |               |                                                                                        | BC022961  | 8.7681  | 5.1519 | 3.6162 |
| 1454737_at   | Dusp9         | dual specificity phosphatase 9                                                         | AV295798  | 7.5774  | 3.9701 | 3.6073 |
| 1436030_at   | Cachd1        | cache domain containing 1                                                              | BB730977  | 7.5664  | 3.9618 | 3.6046 |
| 1430221_at   | 9130008F23Rik | RIKEN cDNA 9130008F23 gene                                                             | BB763680  | 7.4935  | 3.9024 | 3.5911 |
| 1419758_at   | Abcb1a        | ATP-binding cassette, sub-family B (MDR/TAP), member 1A                                | M30697    | 6.3573  | 2.7744 | 3.5829 |
| 1447551_x_at | Lphn3         | latrophilin 3                                                                          | BB274232  | 7.2275  | 3.6503 | 3.5772 |
| 1449670_x_at | Gpr137b       | G protein-coupled receptor 137B                                                        | AW546472  | 6.5429  | 2.9780 | 3.5649 |
| 1428636_at   | Steap2        | six transmembrane epithelial antigen of prostate 2                                     | AK015015  | 10.7211 | 7.1597 | 3.5614 |
| 1448594_at   | Wisp1         | WNT1 inducible signaling pathway protein 1                                             | NM_018865 | 6.7797  | 3.2186 | 3.5611 |
| 1452166_a_at | Krt10         | keratin 10                                                                             | AK014360  | 8.2410  | 4.6853 | 3.5557 |
| 1429273_at   | Bmper         | BMP-binding endothelial regulator                                                      | AK014221  | 6.6421  | 3.0872 | 3.5549 |
| 1420417_at   | Sema3a        | sema domain, immunoglobulin domain (Ig), short basic domain, secreted, (semaphorin) 3A | NM_009152 | 6.9296  | 3.3762 | 3.5534 |
| 1433643_at   | Cacna2d1      | calcium channel, voltage-dependent, alpha2/delta subunit 1                             | BI106777  | 7.6523  | 4.1035 | 3.5488 |
| 1460302_at   | Thbs1         | thrombospondin 1                                                                       | AI385532  | 7.7776  | 4.2333 | 3.5443 |
| 1434474_at   | Abca5         | ATP-binding cassette, sub-family A (ABC1), member 5                                    | BM937648  | 8.3123  | 4.7725 | 3.5398 |
| 1417061_at   | Slc40a1       | solute carrier family 40 (iron-regulated transporter), member 1                        | AF226613  | 6.9948  | 3.4588 | 3.5360 |
| 1420401_a_at | Ramp3         | receptor (calcitonin) activity modifying protein 3                                     | NM_019511 | 8.5290  | 5.0107 | 3.5183 |
| 1442363_at   | 1110012J17Rik | RIKEN cDNA 1110012J17 gene                                                             | BB461471  | 9.0959  | 5.5812 | 3.5147 |
| 1436538_at   | Ankrd37       | ankyrin repeat domain 37                                                               | AV084342  | 8.9864  | 5.4769 | 3.5095 |
| 1437259_at   | Slc9a2        | solute carrier family 9 (sodium/hydrogen exchanger), member 2                          | AV274006  | 6.6560  | 3.1467 | 3.5094 |
| 1440245_at   | Ccdc88b       | coiled-coil domain containing 88B                                                      | AW208904  | 8.0632  | 4.5566 | 3.5067 |
| 1417649_at   | Cdkn1c        | cyclin-dependent kinase inhibitor 1C (P57)                                             | NM_009876 | 9.0270  | 5.5314 | 3.4956 |
| 1452320_at   | Lrp2          | low density lipoprotein receptor-related protein 2                                     | C80829    | 6.9332  | 3.4443 | 3.4889 |
| 1434109_at   | Sh3bgrl2      | SH3 domain binding glutamic acid-rich protein like 2                                   | AV291265  | 8.4026  | 4.9195 | 3.4831 |
| 1458151_at   | 4833444G19Rik | RIKEN cDNA 4833444G19 gene                                                             | AV253033  | 7.3026  | 3.8245 | 3.4782 |
| 1428663_at   | Sgms2         | sphingomyelin synthase 2                                                               | AK017223  | 9.0880  | 5.6110 | 3.4770 |
| 1448467_a_at | Ehbp111       | EH domain binding protein 1-like 1                                                     | NM_053252 | 8.2848  | 4.8198 | 3.4650 |
| 1426926_at   | Plcg2         | phospholipase C, gamma 2                                                               | AW546508  | 9.4093  | 5.9590 | 3.4503 |
| 1422672_at   | Sprr1b        | small proline-rich protein 1B                                                          | NM_009265 | 5.9869  | 2.5429 | 3.4439 |



|              |               |                                                                                    |           |         |        |        |
|--------------|---------------|------------------------------------------------------------------------------------|-----------|---------|--------|--------|
| 1452645_x_at |               |                                                                                    | AF419250  | 5.8414  | 2.3979 | 3.4435 |
| 1438936_s_at |               |                                                                                    | AI385586  | 7.9320  | 4.4990 | 3.4330 |
| 1423513_at   |               |                                                                                    | BG141609  | 9.0065  | 5.5812 | 3.4253 |
| 1448950_at   | Il1r1         | interleukin 1 receptor, type I                                                     | NM_008362 | 8.6155  | 5.1918 | 3.4237 |
| 1449623_at   | Txnrd3        | thioredoxin reductase 3                                                            | AI196535  | 8.2940  | 4.8719 | 3.4222 |
| 1449450_at   | Ptges         | prostaglandin E synthase                                                           | NM_022415 | 8.2218  | 4.8042 | 3.4176 |
| 1439758_at   | Als2cr12      | amyotrophic lateral sclerosis 2 (juvenile) chromosome region, candidate 12 (human) | BF318690  | 6.5688  | 3.1525 | 3.4163 |
| 1454983_at   | Fam63b        | family with sequence similarity 63, member B                                       | BG094392  | 11.4319 | 8.0161 | 3.4157 |
| 1416779_at   | Sdpr          | serum deprivation response                                                         | BE197945  | 7.7180  | 4.3035 | 3.4145 |
| 1448028_at   | Tbc1d24       | TBC1 domain family, member 24                                                      | BF536757  | 7.8870  | 4.4990 | 3.3880 |
| 1418946_at   | St3gal1       | ST3 beta-galactoside alpha-2,3-sialyltransferase 1                                 | NM_009177 | 6.8912  | 3.5127 | 3.3785 |
| 1416778_at   | Sdpr          | serum deprivation response                                                         | BE197945  | 8.6625  | 5.2858 | 3.3767 |
| 1438773_at   | Steap2        | six transmembrane epithelial antigen of prostate 2                                 | BB817972  | 8.9864  | 5.6110 | 3.3754 |
| 1417732_at   | Anxa8         | annexin A8                                                                         | NM_013473 | 7.9881  | 4.6127 | 3.3754 |
| 1417821_at   | D17H6S56E-5   | DNA segment, Chr 17, human D6S56E 5                                                | NM_033075 | 11.3143 | 7.9398 | 3.3745 |
| 1427403_at   | Slco1a5       | solute carrier organic anion transporter family, member 1a5                        | BC004814  | 6.5913  | 3.2186 | 3.3727 |
| 1435541_at   | Btc           | betacellulin, epidermal growth factor family member                                | AV231340  | 8.5244  | 5.1519 | 3.3726 |
| 1455642_a_at | Tspan17       | tetraspanin 17                                                                     | AI844703  | 7.3417  | 3.9701 | 3.3716 |
| 1449424_at   | Plek2         | pleckstrin 2                                                                       | NM_013738 | 6.8805  | 3.5127 | 3.3678 |
| 1434447_at   | Met           | met proto-oncogene                                                                 | BG060788  | 9.8573  | 6.4898 | 3.3674 |
| 1448812_at   | Hpcal1        | hippocalcin-like 1                                                                 | NM_016677 | 11.0298 | 7.6668 | 3.3630 |
| 1436841_at   | Fam63b        | family with sequence similarity 63, member B                                       | AV229336  | 12.7858 | 9.4378 | 3.3479 |
| 1453607_at   | Mfap3l        | microfibrillar-associated protein 3-like                                           | AV280494  | 6.2232  | 2.8813 | 3.3419 |
| 1432410_a_at | Bmp7          | bone morphogenetic protein 7                                                       | AK020411  | 6.8118  | 3.4701 | 3.3416 |
| 1435977_at   | Hdgfrp3       | hepatoma-derived growth factor, related protein 3                                  | BM240385  | 6.9213  | 3.5815 | 3.3399 |
| 1440451_at   | D730048J04Rik | RIKEN cDNA D730048J04 gene                                                         | BG085035  | 6.7079  | 3.3762 | 3.3318 |
| 1443746_x_at | Dmp1          | dentin matrix protein 1                                                            | AV020965  | 5.9820  | 2.6565 | 3.3255 |
| 1422864_at   | Runx1         | runt related transcription factor 1                                                | NM_009821 | 8.3304  | 5.0107 | 3.3196 |
| 1417526_at   | Pcbp3         | poly(rC) binding protein 3                                                         | NM_021568 | 7.8171  | 4.5095 | 3.3077 |
| 1451074_at   | Rnf13         | ring finger protein 13                                                             | AF037205  | 12.5416 | 9.2389 | 3.3027 |
| 1435645_at   | Mmd           | monocyte to macrophage differentiation-associated                                  | AA472735  | 8.2615  | 4.9657 | 3.2958 |
| 1442590_at   |               |                                                                                    | BB366863  | 9.0959  | 5.8041 | 3.2918 |
| 1417872_at   | Fhl1          | four and a half LIM domains 1                                                      | U41739    | 7.2549  | 3.9701 | 3.2848 |
| 1425985_s_at | Masp1         | mannan-binding lectin serine peptidase 1                                           | AB049755  | 8.4758  | 5.1918 | 3.2840 |
| 1421852_at   | Kcnk5         | potassium channel, subfamily K, member 5                                           | AF319542  | 7.5094  | 4.2333 | 3.2761 |
| 1458060_at   | Ldlrap1       | low density lipoprotein receptor adaptor protein 1                                 | BB794855  | 8.6841  | 5.4108 | 3.2733 |
| 1457035_at   | AI607873      | expressed sequence AI607873                                                        | AI607873  | 5.8154  | 2.5429 | 3.2725 |
| 1455158_at   | Itga3         | integrin alpha 3                                                                   | BI664675  | 8.6041  | 5.3414 | 3.2627 |
| 1422836_at   | Mbnl3         | muscleblind-like 3 (Drosophila)                                                    | NM_134163 | 6.4791  | 3.2186 | 3.2605 |
| 1426864_a_at | Ncam1         | neural cell adhesion molecule 1                                                    | BB698413  | 8.2986  | 5.0544 | 3.2442 |
| 1424099_at   | Gpx8          | glutathione peroxidase 8 (putative)                                                | BC019664  | 12.1147 | 8.8715 | 3.2432 |
| 1448029_at   | Tbx3          | T-box 3                                                                            | AA543734  | 6.8246  | 3.5815 | 3.2431 |
| 1419663_at   | Ogn           | osteoglycin                                                                        | BB542051  | 5.8297  | 2.5992 | 3.2305 |
| 1434112_at   | Lphn2         | latrophilin 2                                                                      | BG966339  | 6.7377  | 3.5127 | 3.2250 |
| 1435337_at   | Tshz3         | teashirt zinc finger family member 3                                               | BB150458  | 6.4791  | 3.2568 | 3.2223 |
| 1452106_at   | Npnt          | nephronectin                                                                       | AA223007  | 6.1327  | 2.9129 | 3.2198 |
| 1436842_at   | Fam63b        | family with sequence similarity 63, member B                                       | AV229336  | 12.7253 | 9.5069 | 3.2185 |
| 1449491_at   | Card10        | caspase recruitment domain family, member 10                                       | NM_130859 | 9.8207  | 6.6083 | 3.2124 |
| 1434423_at   | Gulp1         | GULP, engulfment adaptor PTB domain containing 1                                   | BB138485  | 6.1701  | 2.9592 | 3.2110 |
| 1445758_at   |               |                                                                                    | BG076276  | 8.3078  | 5.0970 | 3.2108 |
| 1443694_at   | Rgs20         | regulator of G-protein signaling 20                                                | BB794177  | 7.1796  | 3.9701 | 3.2094 |
| 1448823_at   | Cxcl12        | chemokine (C-X-C motif) ligand 12                                                  | BC006640  | 7.2258  | 4.0372 | 3.1887 |
| 1427975_at   | Rasl10a       | RAS-like, family 10, member A                                                      | AK008807  | 7.2810  | 4.0978 | 3.1831 |
| 1450881_s_at |               |                                                                                    | AK010724  | 9.0404  | 5.8632 | 3.1772 |
| 1448529_at   | Thbd          | thrombomodulin                                                                     | NM_009378 | 8.2662  | 5.0982 | 3.1680 |
| 1425789_s_at | Anxa8         | annexin A8                                                                         | BC013271  | 7.8215  | 4.6586 | 3.1629 |
| 1421624_a_at | Enah          | enabled homolog (Drosophila)                                                       | NM_010135 | 6.4409  | 3.2854 | 3.1554 |
| 1437385_at   | Ccbe1         | collagen and calcium binding EGF domains 1                                         | AV264768  | 6.4337  | 3.2854 | 3.1482 |
| 1458007_at   |               |                                                                                    | BG066725  | 6.5925  | 3.4443 | 3.1482 |

|              |               |                                                                                        |           |         |         |        |
|--------------|---------------|----------------------------------------------------------------------------------------|-----------|---------|---------|--------|
| 1449999_a_at | Cacna2d1      | calcium channel, voltage-dependent, alpha2/delta subunit 1                             | NM_009784 | 6.9073  | 3.7657  | 3.1416 |
| 1416043_at   | Nasp          | nuclear autoantigenic sperm protein (histone-binding)                                  | BB493242  | 7.2488  | 4.1077  | 3.1410 |
| 1420851_at   | Pard6g        | par-6 partitioning defective 6 homolog gamma (C. elegans)                              | NM_053117 | 8.8070  | 5.6689  | 3.1381 |
| 1451046_at   | Zfpn1         | zinc finger protein, multitype 1                                                       | AA014267  | 8.3600  | 5.2306  | 3.1293 |
| 1451469_at   | Cntln         | centlein, centrosomal protein                                                          | BC027370  | 7.3506  | 4.2260  | 3.1246 |
| 1419126_at   | Hoxd9         | homeobox D9                                                                            | BC019150  | 8.3541  | 5.2306  | 3.1234 |
| 1423779_at   | Chchd6        | coiled-coil-helix-coiled-coil-helix domain containing 6                                | BC011331  | 8.2747  | 5.1519  | 3.1228 |
| 1416527_at   | Rab32         | RAB32, member RAS oncogene family                                                      | NM_026405 | 7.9141  | 4.7929  | 3.1213 |
| 1422324_a_at | Pthlh         | parathyroid hormone-like peptide                                                       | NM_008970 | 5.8461  | 2.7301  | 3.1160 |
| 1416715_at   | Gjb3          | gap junction protein, beta 3                                                           | NM_008126 | 7.9861  | 4.8719  | 3.1142 |
| 1450723_at   | Isl1          | ISL1 transcription factor, LIM/homeodomain                                             | BQ176915  | 7.9312  | 4.8244  | 3.1068 |
| 1452304_a_at | Arhgef5       | RHO GUANINE NUCLEOTIDE EXCHANGE FACTOR (GEF) 5                                         | BC025127  | 7.7194  | 4.6127  | 3.1066 |
| 1458268_s_at | Igfbp3        | insulin-like growth factor binding protein 3                                           | AI649005  | 6.0047  | 2.8997  | 3.1050 |
| 1454942_at   | Fam129a       | family with sequence similarity 129, member A                                          | AW554191  | 8.8524  | 5.7480  | 3.1044 |
| 1451744_a_at | Ptgr2         | prostaglandin reductase 2                                                              | BC021466  | 6.4790  | 3.3762  | 3.1029 |
| 1452203_at   | Nabp1         | nucleic acid binding protein 1                                                         | AV313559  | 9.1185  | 6.0270  | 3.0915 |
| 1427028_at   | Lgr6          | leucine-rich repeat-containing G protein-coupled receptor 6                            | BB516297  | 8.1440  | 5.0544  | 3.0896 |
| 1426818_at   | Arrdc4        | arrestin domain containing 4                                                           | BC025091  | 7.2562  | 4.1689  | 3.0873 |
| 1423868_at   | Txnrd3        | thioredoxin reductase 3                                                                | AF349659  | 7.3768  | 4.2966  | 3.0802 |
| 1442359_at   | Steap2        | six transmembrane epithelial antigen of prostate 2                                     | BE995447  | 9.6798  | 6.6030  | 3.0768 |
| 1453065_at   | Aldh5a1       | ALDH5, subfamily A1                                                                    | BQ175320  | 7.3075  | 4.2333  | 3.0742 |
| 1422852_at   | Cib2          | calcium and integrin binding family member 2                                           | NM_019686 | 7.3681  | 4.2966  | 3.0715 |
| 1428197_at   | Tspan9        | tetraspanin 9                                                                          | AK020159  | 9.9790  | 6.9094  | 3.0696 |
| 1417818_at   | Wwtr1         | WW domain containing transcription regulator 1                                         | BC014727  | 13.2271 | 10.1706 | 3.0565 |
| 1422344_s_at | Tnfrsf10b     | tumor necrosis factor receptor superfamily, member 10b                                 | NM_020294 | 7.1485  | 4.1035  | 3.0450 |
| 1426642_at   | Fn1           | fibronectin 1                                                                          | BC004724  | 11.4557 | 8.4230  | 3.0327 |
| 1433465_a_at | AI467606      | expressed sequence AI467606                                                            | BB234337  | 8.4744  | 5.4443  | 3.0301 |
| 1440668_at   | Adamtsl3      | ADAMTS-like 3                                                                          | BM235389  | 6.9357  | 3.9075  | 3.0282 |
| 1415977_at   | Isyna1        | myo-inositol 1-phosphate synthase A1                                                   | NM_023627 | 7.2436  | 4.2159  | 3.0277 |
| 1418421_at   | Bcl6b         | B cell CLL/lymphoma 6, member B                                                        | NM_007528 | 9.3411  | 6.3197  | 3.0214 |
| 1422179_at   | Gjb4          | gap junction protein, beta 4                                                           | NM_008127 | 6.7163  | 3.6970  | 3.0193 |
| 1438602_s_at | Masp1         | mannan-binding lectin serine peptidase 1                                               | BB732340  | 8.4295  | 5.4108  | 3.0187 |
| 1423277_at   | Ptprk         | protein tyrosine phosphatase, receptor type, K                                         | AI893646  | 7.8900  | 4.8719  | 3.0181 |
| 1437722_x_at | Pcbp3         | poly(rC) binding protein 3                                                             | BB559884  | 6.8500  | 3.8342  | 3.0157 |
| 1448870_at   | Ltbp1         | latent transforming growth factor beta binding protein 1                               | AF022889  | 9.9486  | 6.9332  | 3.0154 |
| 1455238_at   | Mum11l        | melanoma associated antigen (mutated) 1-like 1                                         | BB103233  | 9.4211  | 6.4073  | 3.0138 |
| 1453351_at   | Tbx20         | T-box 20                                                                               | AK020409  | 5.6631  | 2.6565  | 3.0066 |
| 1423310_at   | Tpbp          | trophoblast glycoprotein                                                               | BQ177165  | 8.7788  | 5.7781  | 3.0007 |
| 1451461_a_at | Aldoc         | aldolase C, fructose-bisphosphate                                                      | BC008184  | 11.0212 | 8.0217  | 2.9995 |
| 1415935_at   | Smoc2         | SPARC related modular calcium binding 2                                                | NM_022315 | 6.9661  | 3.9712  | 2.9949 |
| 1417822_at   | D17H6S56E-5   | DNA segment, Chr 17, human D6S56E 5                                                    | NM_033075 | 11.6723 | 8.6779  | 2.9944 |
| 1420654_a_at | Gbe1          | glucan (1,4-alpha-), branching enzyme 1                                                | NM_028803 | 8.6612  | 5.6689  | 2.9923 |
| 1425906_a_at | Sema3e        | sema domain, immunoglobulin domain (Ig), short basic domain, secreted, (semaphorin) 3E | AF034744  | 6.7217  | 3.7324  | 2.9893 |
| 1427484_at   | Emi5          | echinoderm microtubule associated protein like 5                                       | BB650819  | 8.0857  | 5.0970  | 2.9888 |
| 1452907_at   | Galc          | galactosylceramidase                                                                   | AK010101  | 8.8070  | 5.8233  | 2.9837 |
| 1437479_x_at | Tbx3          | T-box 3                                                                                | BB728182  | 6.1344  | 3.1525  | 2.9819 |
| 1418123_at   | Unc119        | unc-119 homolog (C. elegans)                                                           | BC001990  | 9.5086  | 6.5268  | 2.9818 |
| 1419759_at   | Abcb1a        | ATP-binding cassette, sub-family B (MDR/TAP), member 1A                                | M30697    | 6.0687  | 3.0872  | 2.9815 |
| 1418025_at   | Bhlhe40       | basic helix-loop-helix family, member e40                                              | NM_011498 | 11.2314 | 8.2521  | 2.9793 |
| 1455225_at   | Syne1         | synaptic nuclear envelope 1                                                            | AV237615  | 6.8816  | 3.9024  | 2.9792 |
| 1426880_at   | Etl4          | enhancer trap locus 4                                                                  | BM250266  | 6.6382  | 3.6625  | 2.9758 |
| 1434070_at   | Jag1          | jagged 1                                                                               | AV359819  | 10.0669 | 7.0937  | 2.9733 |
| 1425741_at   | Srgap3        | SLIT-ROBO Rho GTPase activating protein 3                                              | AF338472  | 6.2161  | 3.2441  | 2.9720 |
| 1434777_at   | Mycl1         | v-myc myelocytomatosis viral oncogene homolog 1, lung carcinoma derived (avian)        | BG064871  | 6.8729  | 3.9024  | 2.9705 |
| 1423311_s_at | Tpbp          | trophoblast glycoprotein                                                               | BQ177165  | 8.7031  | 5.7373  | 2.9658 |
| 1435029_at   | B230120H23Rik | RIKEN cDNA B230120H23 gene                                                             | BB454974  | 10.9397 | 7.9764  | 2.9633 |
| 1440519_at   | Sp8           | trans-acting transcription factor 8                                                    | AV302930  | 6.3376  | 3.3762  | 2.9615 |

|              |               |                                                                          |           |         |        |        |
|--------------|---------------|--------------------------------------------------------------------------|-----------|---------|--------|--------|
| 1435649_at   | Nexn          | nexilin                                                                  | BM225804  | 6.7690  | 3.8152 | 2.9538 |
| 1460319_at   | Fut8          | fucosyltransferase 8                                                     | NM_016893 | 10.3466 | 7.3941 | 2.9525 |
| 1418572_x_at | Tnfrsf12a     | tumor necrosis factor receptor superfamily, member 12a                   | NM_013749 | 12.3127 | 9.3690 | 2.9437 |
| 1424339_at   | Oasl1         | 2'-5' oligoadenylate synthetase-like 1                                   | AB067533  | 10.2912 | 7.3506 | 2.9406 |
| 1421228_at   | Ccl7          | chemokine (C-C motif) ligand 7                                           | AF128193  | 7.4928  | 4.5530 | 2.9398 |
| 1426514_at   | Chst15        | carbohydrate (N-acetylgalactosamine 4-sulfate 6-O) sulfotransferase 15   | AK019474  | 5.9092  | 2.9695 | 2.9397 |
| 1448640_at   | Slc14a1       | solute carrier family 14 (urea transporter), member 1                    | NM_028122 | 6.1198  | 3.1812 | 2.9386 |
| 1422540_at   | Fbln1         | fibulin 1                                                                | NM_010180 | 7.5434  | 4.6127 | 2.9306 |
| 1419613_at   | Col7a1        | collagen, type VII, alpha 1                                              | NM_007738 | 9.5370  | 6.6129 | 2.9242 |
| 1445463_at   | Npepps        | aminopeptidase puromycin sensitive                                       | BE983885  | 6.8927  | 3.9701 | 2.9226 |
| 1435396_at   | Stxbp6        | syntaxin binding protein 6 (amisyn)                                      | BM218509  | 5.8055  | 2.8865 | 2.9189 |
| 1423406_at   | Sv2a          | synaptic vesicle glycoprotein 2 a                                        | BC026494  | 6.8057  | 3.8914 | 2.9144 |
| 1416268_at   | Ets2          | E26 avian leukemia oncogene 2, 3' domain                                 | BC005486  | 9.6096  | 6.6964 | 2.9132 |
| 1416892_s_at | Fam107b       | family with sequence similarity 107, member B                            | BC021353  | 11.1006 | 8.1876 | 2.9130 |
| 1427321_s_at | Cxadr         | coxsackie virus and adenovirus receptor                                  | AK004908  | 7.3530  | 4.4400 | 2.9129 |
| 1421732_at   | Glrp1         | glutamine repeat protein 1                                               | NM_008132 | 8.4630  | 5.5508 | 2.9123 |
| 1421106_at   | Jag1          | jagged 1                                                                 | AA880220  | 8.0221  | 5.1119 | 2.9102 |
| 1448013_at   | Usp24         | ubiquitin specific peptidase 24                                          | AI196993  | 8.6422  | 5.7329 | 2.9093 |
| 1442325_at   | Tbc1d24       | TBC1 domain family, member 24                                            | AA270038  | 6.2831  | 3.3762 | 2.9069 |
| 1448509_at   | Fam107b       | family with sequence similarity 107, member B                            | BC021353  | 9.1069  | 6.2004 | 2.9064 |
| 1441481_at   | Mfap3l        | microfibrillar-associated protein 3-like                                 | AV262974  | 6.6707  | 3.7657 | 2.9050 |
| 1425155_x_at | Csf1          | colony stimulating factor 1 (macrophage)                                 | M21149    | 7.8634  | 4.9657 | 2.8977 |
| 1457682_at   | Arhgap42      | Rho GTPase activating protein 42                                         | AV368701  | 6.1607  | 3.2647 | 2.8960 |
| 1453386_at   | Tusc1         | tumor suppressor candidate 1                                             | AK008612  | 6.3383  | 3.4443 | 2.8940 |
| 1451539_at   | Baiap2l1      | BAI1-associated protein 2-like 1                                         | BC015459  | 7.0513  | 4.1665 | 2.8848 |
| 1423287_at   | Cbln1         | cerebellin 1 precursor protein                                           | AA016422  | 5.7515  | 2.8679 | 2.8836 |
| 1426241_a_at | Scmh1         | sex comb on midleg homolog 1                                             | AB030906  | 8.0272  | 5.1519 | 2.8753 |
| 1434111_at   | Lphn2         | latrophilin 2                                                            | BG966339  | 7.3610  | 4.4904 | 2.8706 |
| 1428034_a_at | Tnfrsf9       | tumor necrosis factor receptor superfamily, member 9                     | BC028507  | 6.0865  | 3.2186 | 2.8679 |
| 1439036_a_at | Atp1b1        | ATPase, Na <sup>+</sup> /K <sup>+</sup> transporting, beta 1 polypeptide | AV152334  | 5.9044  | 3.0381 | 2.8663 |
| 1441890_x_at | Tmeff1        | transmembrane protein with EGF-like and two follistatin-like domains 1   | BB366425  | 5.6402  | 2.7744 | 2.8658 |
| 1424854_at   |               |                                                                          | BC019757  | 6.9685  | 4.1035 | 2.8650 |
| 1433775_at   | C77080        | expressed sequence C77080                                                | BB163333  | 9.1452  | 6.2810 | 2.8642 |
| 1444422_at   | Pcdh19        | protocadherin 19                                                         | BB732600  | 6.1457  | 3.2854 | 2.8603 |
| 1443729_at   | Mtss1         | metastasis suppressor 1                                                  | BI466419  | 6.8303  | 3.9701 | 2.8602 |
| 1449449_at   | Ptges         | prostaglandin E synthase                                                 | NM_022415 | 7.5804  | 4.7207 | 2.8597 |
| 1419735_at   | Csn3          | casein kappa                                                             | NM_007786 | 10.0174 | 7.1586 | 2.8588 |
| 1443832_s_at | Sdpr          | serum deprivation response                                               | AV064339  | 7.4140  | 4.5566 | 2.8574 |
| 1451871_a_at | Ghr           | growth hormone receptor                                                  | M33324    | 7.1516  | 4.2966 | 2.8550 |
| 1424951_at   | Baiap2l1      | BAI1-associated protein 2-like 1                                         | BC015459  | 8.0455  | 5.1918 | 2.8538 |
| 1417812_a_at | Lamb3         | laminin, beta 3                                                          | NM_008484 | 6.7532  | 3.9024 | 2.8508 |
| 1424829_at   | A830007P12Rik | RIKEN cDNA A830007P12 gene                                               | BC013092  | 8.0401  | 5.1918 | 2.8483 |
| 1436919_at   | Trp53i11      | transformation related protein 53 inducible protein 11                   | BQ175031  | 7.1383  | 4.2966 | 2.8416 |
| 1425622_at   | Edil3         | EGF-like repeats and discoidin I-like domains 3                          | AF031524  | 6.3376  | 3.5127 | 2.8249 |
| 1416871_at   | Adam8         | a disintegrin and metallopeptidase domain 8                              | NM_007403 | 7.3701  | 4.5453 | 2.8248 |
| 1442321_at   | Comm2         | COMM domain containing 2                                                 | BE853420  | 6.5881  | 3.7686 | 2.8195 |
| 1457675_at   | 2510002D24Rik | RIKEN cDNA 2510002D24 gene                                               | BG063089  | 7.5173  | 4.7020 | 2.8154 |
| 1456307_s_at | Adcy7         | adenylate cyclase 7                                                      | BB746807  | 10.3124 | 7.5004 | 2.8120 |
| 1418471_at   | Pgf           | placental growth factor                                                  | NM_008827 | 8.6711  | 5.8632 | 2.8080 |
| 1440633_at   | Neil3         | nei like 3 (E. coli)                                                     | AV316939  | 7.0380  | 4.2333 | 2.8047 |
| 1418382_at   | Apcdd1        | adenomatosis polyposis coli down-regulated 1                             | BB770932  | 6.4534  | 3.6503 | 2.8031 |
| 1460406_at   | Pls1          | plastin 1 (I-isoform)                                                    | BC026410  | 8.4021  | 5.6110 | 2.7910 |
| 1416554_at   | Pdim1         | PDZ and LIM domain 1 (elfin)                                             | NM_016861 | 11.6067 | 8.8177 | 2.7890 |
| 1427256_at   | Vcan          | versican                                                                 | BM251152  | 8.4243  | 5.6402 | 2.7841 |
| 1445534_at   | Flnb          | filamin, beta                                                            | BM206272  | 8.4243  | 5.6402 | 2.7841 |
| 1436839_at   | 2010109K11Rik | RIKEN cDNA 2010109K11 gene                                               | BB174749  | 6.4784  | 3.6970 | 2.7814 |
| 1436003_at   | Vcam1         | vascular cell adhesion molecule 1                                        | AV280637  | 5.3854  | 2.6055 | 2.7799 |
| 1416893_at   | Fam107b       | family with sequence similarity 107, member B                            | BC021353  | 8.1166  | 5.3414 | 2.7752 |
| 1418097_a_at | Crlf2         | cytokine receptor-like factor 2                                          | NM_016715 | 7.0708  | 4.2966 | 2.7742 |
| 1424531_a_at | Tcea3         | transcription elongation factor A (SII), 3                               | BC010807  | 6.8767  | 4.1035 | 2.7732 |
| 1428330_at   | Dopey2        | dopey family member 2                                                    | AK012087  | 6.4207  | 3.6503 | 2.7704 |

|              |               |                                                               |           |         |        |        |
|--------------|---------------|---------------------------------------------------------------|-----------|---------|--------|--------|
| 1456929_at   | BC042782      | cDNA sequence BC042782                                        | BM235852  | 6.2067  | 3.4443 | 2.7625 |
| 1453152_at   | Mamdc2        | MAM domain containing 2                                       | AK004794  | 6.2033  | 3.4443 | 2.7590 |
| 1455197_at   | Rnd1          | Rho family GTPase 1                                           | BE852181  | 8.8070  | 6.0489 | 2.7580 |
| 1434891_at   | Ptgfrn        | prostaglandin F2 receptor negative regulator                  | AV253087  | 10.2178 | 7.4611 | 2.7567 |
| 1460521_a_at | Nabp1         | nucleic acid binding protein 1                                | AK015312  | 5.7781  | 3.0227 | 2.7554 |
| 1456937_at   | Cdh26         | cadherin-like 26                                              | BB748621  | 7.0061  | 4.2531 | 2.7530 |
| 1455149_at   | Sh3rf1        | SH3 domain containing ring finger 1                           | BB072090  | 7.5664  | 4.8136 | 2.7528 |
| 1424133_at   | Tmem98        | transmembrane protein 98                                      | BC011208  | 6.9835  | 4.2333 | 2.7502 |
| 1437268_at   | Lancl3        | LanC lantibiotic synthetase component C-like 3 (bacterial)    | BB811311  | 5.9619  | 3.2186 | 2.7433 |
| 1438160_x_at | Slco4a1       | solute carrier organic anion transporter family, member 4a1   | AV348121  | 6.9553  | 4.2131 | 2.7422 |
| 1427127_x_at | Hspa1b        | heat shock protein 1B                                         | M12573    | 9.5409  | 6.8057 | 2.7351 |
| 1422771_at   | Smad6         | SMAD family member 6                                          | AF010133  | 7.7316  | 4.9989 | 2.7327 |
| 1422865_at   | Runx1         | runt related transcription factor 1                           | NM_009821 | 6.7621  | 4.0347 | 2.7274 |
| 1420382_at   | Apobr         | apolipoprotein B receptor                                     | NM_138310 | 8.2848  | 5.5598 | 2.7250 |
| 1427357_at   | Cda           | cytidine deaminase                                            | AK008793  | 10.0017 | 7.2805 | 2.7212 |
| 1450377_at   | Thbs1         | thrombospondin 1                                              | AI385532  | 6.6421  | 3.9218 | 2.7203 |
| 1425749_at   | Stxbp6        | syntaxin binding protein 6 (amisyn)                           | BC024598  | 5.7515  | 3.0342 | 2.7173 |
| 1429775_a_at |               |                                                               | AK009736  | 8.8975  | 6.1807 | 2.7167 |
| 1452349_x_at |               |                                                               | AI481797  | 11.2173 | 8.5047 | 2.7126 |
| 1436317_at   | Pgap1         | post-GPI attachment to proteins 1                             | BM115569  | 8.5126  | 5.8041 | 2.7084 |
| 1434096_at   | Slc4a4        | solute carrier family 4 (anion exchanger), member 4           | BB283443  | 6.2200  | 3.5127 | 2.7073 |
| 1442223_at   | Enah          | enabled homolog (Drosophila)                                  | AV329519  | 6.4769  | 3.7726 | 2.7043 |
| 1425094_a_at | Lhx6          | LIM homeobox protein 6                                        | AB031040  | 6.9720  | 4.2721 | 2.6999 |
| 1432198_at   | Prune2        | prune homolog 2 (Drosophila)                                  | AK018172  | 8.3378  | 5.6402 | 2.6976 |
| 1427287_s_at | Itpr2         | inositol 1,4,5-triphosphate receptor 2                        | BB216794  | 7.9908  | 5.2936 | 2.6973 |
| 1415803_at   | Cx3cl1        | chemokine (C-X3-C motif) ligand 1                             | AF010586  | 7.4693  | 4.7725 | 2.6968 |
| 1428057_a_at | Ahnak         | AHNAK nucleoprotein (desmoyokin)                              | BC028439  | 9.8352  | 7.1413 | 2.6939 |
| 1420653_at   | Tgfb1         | transforming growth factor, beta 1                            | NM_011577 | 7.7845  | 5.0970 | 2.6875 |
| 1420450_at   | Mmp10         | matrix metalloproteinase 10                                   | NM_019471 | 7.8384  | 5.1519 | 2.6865 |
| 1420551_at   | Murc          | muscle-related coiled-coil protein                            | NM_026509 | 6.5943  | 3.9080 | 2.6863 |
| 1418571_at   | Tnfrsf12a     | tumor necrosis factor receptor superfamily, member 12a        | NM_013749 | 12.4095 | 9.7237 | 2.6857 |
| 1424704_at   | Runx2         | runt related transcription factor 2                           | D14636    | 10.1042 | 7.4196 | 2.6846 |
| 1440952_at   |               |                                                               | BM123777  | 6.5424  | 3.8579 | 2.6845 |
| 1441824_at   | Mboat1        | membrane bound O-acyltransferase domain containing 1          | AW457596  | 7.5828  | 4.9040 | 2.6788 |
| 1421694_a_at | Vcan          | versican                                                      | NM_019389 | 8.1559  | 5.4771 | 2.6788 |
| 1431028_a_at | Pank1         | pantothenate kinase 1                                         | AK017345  | 7.3970  | 4.7207 | 2.6763 |
| 1423835_at   | Zfp503        | zinc finger protein 503                                       | BB447914  | 6.4410  | 3.7657 | 2.6753 |
| 1443847_x_at | Aff2          | AF4/FMR2 family, member 2                                     | BB342212  | 5.8922  | 3.2186 | 2.6736 |
| 1444432_at   | D330040H18Rik | RIKEN cDNA D330040H18 gene                                    | BB532898  | 5.6918  | 3.0227 | 2.6691 |
| 1436920_at   | Pcdh17        | protocadherin 17                                              | BQ176938  | 9.3149  | 6.6596 | 2.6553 |
| 1417995_at   | Ptpn22        | protein tyrosine phosphatase, non-receptor type 22 (lymphoid) | NM_008979 | 5.8665  | 3.2186 | 2.6479 |
| 1425166_at   | Rbl1          | retinoblastoma-like 1 (p107)                                  | U27178    | 9.2288  | 6.5881 | 2.6407 |
| 1429503_at   | Fam69a        | family with sequence similarity 69, member A                  | AK013580  | 8.4545  | 5.8144 | 2.6401 |
| 1429184_at   | Gvin1         | GTPase, very large interferon inducible 1                     | BM243571  | 8.4299  | 5.7910 | 2.6390 |
| 1434211_at   | Sh3bgrl2      | SH3 domain binding glutamic acid-rich protein like 2          | BB352548  | 7.5094  | 4.8719 | 2.6376 |
| 1422833_at   | Foxa2         | forkhead box A2                                               | NM_010446 | 6.8029  | 4.1653 | 2.6376 |
| 1432103_a_at | Sh3gl3        | SH3-domain GRB2-like 3                                        | AK012114  | 6.4632  | 3.8342 | 2.6290 |
| 1430038_at   | Gphn          | gephyrin                                                      | AK017831  | 8.4507  | 5.8239 | 2.6268 |
| 1448606_at   | Lpar1         | lysophosphatidic acid receptor 1                              | U70622    | 7.8151  | 5.1918 | 2.6233 |
| 1450016_at   | Ccng1         | cyclin G1                                                     | BG065754  | 9.0577  | 6.4358 | 2.6218 |
| 1423260_at   | Id4           | inhibitor of DNA binding 4                                    | BB121406  | 7.4935  | 4.8719 | 2.6216 |
| 1437199_at   | Dusp5         | dual specificity phosphatase 5                                | BB442784  | 9.3935  | 6.7753 | 2.6181 |
| 1448014_s_at | Usp24         | ubiquitin specific peptidase 24                               | AI196993  | 9.0421  | 6.4242 | 2.6179 |
| 1423488_at   | Mmd           | monocyte to macrophage differentiation-associated             | BC021914  | 9.9937  | 7.3768 | 2.6169 |
| 1429693_at   | Dab2          | disabled 2, mitogen-responsive phosphoprotein                 | AK017619  | 7.1687  | 4.5566 | 2.6121 |
| 1424679_at   | Mab21l1       | mab-21-like 1 (C. elegans)                                    | AF228913  | 5.8297  | 3.2186 | 2.6111 |
| 1434278_at   | Mtm1          | X-linked myotubular myopathy gene 1                           | BG976607  | 10.1097 | 7.4990 | 2.6107 |
| 1424226_at   | 9030617O03Rik | RIKEN cDNA 9030617O03 gene                                    | BC021385  | 7.2750  | 4.6674 | 2.6075 |
| 1444229_at   | Nr2f2         | nuclear receptor subfamily 2, group 1, member 2               | BB053811  | 5.7082  | 3.1012 | 2.6070 |
| 1449084_s_at | Sh3d19        | SH3 domain protein D19                                        | NM_012059 | 10.2708 | 7.6668 | 2.6040 |

|              |               |                                                              |           |         |         |        |
|--------------|---------------|--------------------------------------------------------------|-----------|---------|---------|--------|
| 1430310_at   | Tspan11       | tetraspanin 11                                               | BB535262  | 7.1599  | 4.5566  | 2.6033 |
| 1436467_at   | D230004N17Rik | RIKEN cDNA D230004N17 gene                                   | AU067749  | 6.2954  | 3.6970  | 2.5984 |
| 1436042_at   | Tln1          | taln 1                                                       | BI648366  | 7.6524  | 5.0544  | 2.5980 |
| 1438405_at   | Fgf7          | fibroblast growth factor 7                                   | BB791906  | 9.0542  | 6.4574  | 2.5968 |
| 1460196_at   | Cbr1          | carbonyl reductase 1                                         | NM_007620 | 8.3946  | 5.8041  | 2.5905 |
| 1428749_at   | Dmxl2         | Dmx-like 2                                                   | AK018275  | 5.2465  | 2.6565  | 2.5900 |
| 1451983_at   | Irx1          | Iroquois related homeobox 1 (Drosophila)                     | AF165984  | 6.4923  | 3.9024  | 2.5899 |
| 1440037_at   | Pbx1          | pre B cell leukemia homeobox 1                               | BB480970  | 6.8786  | 4.2966  | 2.5819 |
| 1425911_a_at | Fgfr1         | fibroblast growth factor receptor 1                          | M65053    | 6.5624  | 3.9807  | 2.5817 |
| 1427126_at   | Hspa1b        | heat shock protein 1B                                        | M12573    | 9.0693  | 6.4898  | 2.5795 |
| 1440085_at   | Eda2r         | ectodysplasin A2 receptor                                    | AV246296  | 6.9332  | 4.3588  | 2.5744 |
| 1454799_at   | Agpat9        | 1-acylglycerol-3-phosphate O-acyltransferase 9               | AV300264  | 8.3253  | 5.7515  | 2.5737 |
| 1453286_at   | Plxna2        | plexin A2                                                    | BB085537  | 6.9753  | 4.4022  | 2.5731 |
| 1454795_at   | Cobl1         | Cobl-like 1                                                  | AV080881  | 9.2805  | 6.7079  | 2.5725 |
| 1415999_at   | Hey1          | hairy/enhancer-of-split related with YRPW motif 1            | NM_010423 | 7.1622  | 4.5923  | 2.5699 |
| 1426450_at   | Plcl2         | phospholipase C-like 2                                       | BM207017  | 6.6939  | 4.1327  | 2.5612 |
| 1425391_a_at | Osbpl5        | oxysterol binding protein-like 5                             | AB074008  | 7.5434  | 4.9884  | 2.5550 |
| 1438953_at   | Figf          | c-fos induced growth factor                                  | BB359521  | 6.6564  | 4.1029  | 2.5535 |
| 1421321_a_at | Net1          | neuroepithelial cell transforming gene 1                     | NM_019671 | 7.9756  | 5.4222  | 2.5534 |
| 1418715_at   | Pank1         | pantothenate kinase 1                                        | BC023496  | 7.3238  | 4.7725  | 2.5513 |
| 1439852_at   |               |                                                              | BB036443  | 6.2005  | 3.6503  | 2.5502 |
| 1428682_at   | Zc3h6         | zinc finger CCCH type containing 6                           | AK019473  | 7.7805  | 5.2306  | 2.5499 |
| 1416168_at   | Serpinf1      | serine (or cysteine) peptidase inhibitor, clade F, member 1  | NM_011340 | 10.4624 | 7.9139  | 2.5485 |
| 1415936_at   | Bcar3         | breast cancer anti-estrogen resistance 3                     | NM_013867 | 9.0204  | 6.4737  | 2.5467 |
| 1426850_a_at | Map2k6        | mitogen-activated protein kinase kinase 6                    | BB261602  | 7.0433  | 4.4990  | 2.5443 |
| 1460657_at   | Wnt10a        | wingless related MMTV integration site 10a                   | NM_009518 | 8.3723  | 5.8284  | 2.5439 |
| 1419761_a_at | Gabpb1        | GA repeat binding protein, beta 1                            | NM_010249 | 9.5486  | 7.0061  | 2.5425 |
| 1450920_at   | Ccnb2         | cyclin B2                                                    | AK013312  | 13.8079 | 11.2671 | 2.5408 |
| 1420682_at   | Chrn1         | cholinergic receptor, nicotinic, beta polypeptide 1 (muscle) | M14537    | 6.3729  | 3.8342  | 2.5386 |
| 1428585_at   | Actn1         | actinin, alpha 1                                             | BE853286  | 11.4763 | 8.9411  | 2.5353 |
| 1419012_at   | Zfpm2         | zinc finger protein, multitype 2                             | NM_011766 | 7.8390  | 5.3054  | 2.5336 |
| 1423489_at   | Mmd           | monocyte to macrophage differentiation-associated            | BC021914  | 10.0209 | 7.4882  | 2.5328 |
| 1450882_s_at |               |                                                              | AK010724  | 8.3696  | 5.8382  | 2.5314 |
| 1448300_at   | Mgst3         | microsomal glutathione S-transferase 3                       | NM_025569 | 9.8154  | 7.2842  | 2.5311 |
| 1421923_at   | Sh3bp5        | SH3-domain binding protein 5 (BTK-associated)                | BQ179335  | 8.1389  | 5.6110  | 2.5279 |
| 1435771_at   | Plcb4         | phospholipase C, beta 4                                      | BM730668  | 7.3506  | 4.8229  | 2.5277 |
| 1423312_at   | Tpbp          | trophoblast glycoprotein                                     | BQ177165  | 6.6923  | 4.1689  | 2.5234 |
| 1456523_at   | Gm2115        | predicted gene 2115                                          | BB767153  | 6.3376  | 3.8202  | 2.5174 |
| 1434601_at   | Amigo2        | adhesion molecule with Ig like domain 2                      | AV315087  | 5.8484  | 3.3330  | 2.5154 |
| 1449429_at   | Fkbp1b        | FK506 binding protein 1b                                     | NM_016863 | 7.7828  | 5.2685  | 2.5143 |
| 1448593_at   | Wisp1         | WNT1 inducible signaling pathway protein 1                   | NM_018865 | 7.4774  | 4.9657  | 2.5117 |
| 1424008_a_at | Rbpms2        | RNA binding protein with multiple splicing 2                 | BC021788  | 10.6610 | 8.1508  | 2.5102 |
| 1442549_at   | Mbnl3         | muscleblind-like 3 (Drosophila)                              | BB211386  | 6.1570  | 3.6503  | 2.5066 |
| 1454877_at   | Sertad4       | SERTA domain containing 4                                    | BQ174721  | 8.9696  | 6.4737  | 2.4959 |
| 1416804_at   | Ehbp11        | EH domain binding protein 1-like 1                           | NM_053252 | 7.0394  | 4.5449  | 2.4945 |
| 1460632_at   | Rdh10         | retinol dehydrogenase 10 (all-trans)                         | BG069583  | 7.7627  | 5.2685  | 2.4942 |
| 1424220_a_at | Porcn         | porcupine homolog (Drosophila)                               | AB036749  | 7.7205  | 5.2306  | 2.4899 |
| 1417143_at   | Lpar1         | lysophosphatidic acid receptor 1                             | U70622    | 7.5621  | 5.0760  | 2.4861 |
| 1438494_at   | Hrh1          | histamine receptor H1                                        | BB051552  | 6.0026  | 3.5180  | 2.4846 |
| 1444524_at   | Gm14005       | predicted gene 14005                                         | BE943672  | 9.7289  | 7.2467  | 2.4822 |
| 1423805_at   | Dab2          | disabled 2, mitogen-responsive phosphoprotein                | BC006588  | 6.8406  | 4.3588  | 2.4818 |
| 1422101_at   | Tnfrsf23      | tumor necrosis factor receptor superfamily, member 23        | NM_024290 | 6.2475  | 3.7657  | 2.4818 |
| 1447812_x_at | Finc          | filamin C, gamma                                             | AV014577  | 9.1065  | 6.6275  | 2.4790 |
| 1426571_at   | Ano1          | anoctamin 1, calcium activated chloride channel              | AW910499  | 8.4787  | 6.0047  | 2.4740 |
| 1422038_a_at | Tnfrsf22      | tumor necrosis factor receptor superfamily, member 22        | NM_023680 | 7.7042  | 5.2306  | 2.4736 |
| 1453851_a_at | Gadd45g       | growth arrest and DNA-damage-inducible 45 gamma              | AK007410  | 9.7476  | 7.2750  | 2.4727 |
| 1426930_at   | Celf4         | CUGBP, Elav-like family member 4                             | AV327653  | 9.8210  | 7.3506  | 2.4705 |
| 1420512_at   | Dkk2          | dickkopf homolog 2 (Xenopus laevis)                          | NM_020265 | 5.4296  | 2.9592  | 2.4705 |
| 1428509_at   | Myo1e         | myosin IE                                                    | AK018649  | 10.8446 | 8.3745  | 2.4701 |
| 1421291_at   | Il18rap       | interleukin 18 receptor accessory protein                    | NM_010553 | 6.5729  | 4.1034  | 2.4695 |
| 1455037_at   | Plxna2        | plexin A2                                                    | BB002869  | 7.5239  | 5.0544  | 2.4695 |
| 1420352_at   | Prss22        | protease, serine, 22                                         | NM_133731 | 7.0809  | 4.6165  | 2.4644 |

|              |               |                                                                  |           |         |        |        |
|--------------|---------------|------------------------------------------------------------------|-----------|---------|--------|--------|
| 1440084_at   |               |                                                                  | AV380966  | 6.1607  | 3.6970 | 2.4638 |
| 1421045_at   | Mrc2          | mannose receptor, C type 2                                       | BB528408  | 7.5570  | 5.0970 | 2.4600 |
| 1435750_at   | Gchfr         | GTP cyclohydrolase I feedback regulator                          | BB610454  | 9.1214  | 6.6627 | 2.4587 |
| 1440833_at   | Cdk13         | cyclin-dependent kinase 13                                       | BG070538  | 8.4630  | 6.0047 | 2.4583 |
| 1452251_at   | Nbea          | neurobeachin                                                     | AA986379  | 8.8304  | 6.3729 | 2.4575 |
| 1421834_at   | Pip5k1b       | phosphatidylinositol-4-phosphate 5-kinase, type 1 beta           | NM_008846 | 7.4742  | 5.0177 | 2.4564 |
| 1422567_at   | Fam129a       | family with sequence similarity 129, member A                    | NM_022018 | 8.4914  | 6.0372 | 2.4542 |
| 1460009_at   | Ier5          | immediate early response 5                                       | BB667115  | 5.7395  | 3.2854 | 2.4541 |
| 1426619_at   | Aim2          | absent in melanoma 2                                             | BE685969  | 6.0351  | 3.5815 | 2.4536 |
| 1429637_at   | Fam198b       | family with sequence similarity 198, member B                    | AK008987  | 5.3501  | 2.8966 | 2.4536 |
| 1428025_s_at | Pitpnc1       | phosphatidylinositol transfer protein, cytoplasmic 1             | BC028271  | 5.5405  | 3.0872 | 2.4533 |
| 1441750_x_at | 4930447F24Rik | RIKEN cDNA 4930447F24 gene                                       | BB796499  | 7.8572  | 5.4108 | 2.4464 |
| 1420892_at   | Wnt7b         | wingless-related MMTV integration site 7B                        | W29605    | 8.9732  | 6.5268 | 2.4464 |
| 1422428_at   | Acsbg1        | acyl-CoA synthetase bubblegum family member 1                    | NM_053178 | 8.0622  | 5.6166 | 2.4457 |
| 1444290_at   | Steap2        | six transmembrane epithelial antigen of prostate 2               | AV369536  | 6.8835  | 4.4400 | 2.4435 |
| 1440847_at   | Mtss1         | metastasis suppressor 1                                          | BB326749  | 6.1345  | 3.6970 | 2.4376 |
| 1428319_at   | Pdlim7        | PDZ and LIM domain 7                                             | AK010339  | 9.4011  | 6.9649 | 2.4363 |
| 1435743_at   | Klhl23        | kelch-like 23 (Drosophila)                                       | AW548377  | 7.1586  | 4.7247 | 2.4339 |
| 1433670_at   | Emp2          | epithelial membrane protein 2                                    | BE571790  | 10.5645 | 8.1321 | 2.4324 |
| 1416250_at   | Btg2          | B cell translocation gene 2, anti-proliferative                  | NM_007570 | 9.0860  | 6.6564 | 2.4296 |
| 1419495_at   | Imp2l         | IMP2 inner mitochondrial membrane peptidase-like (S. cerevisiae) | NM_053122 | 7.0360  | 4.6082 | 2.4278 |
| 1443178_at   | Rnf13         | ring finger protein 13                                           | BB384408  | 6.9835  | 4.5566 | 2.4269 |
| 1426806_at   | Nabp1         | nucleic acid binding protein 1                                   | AV313559  | 7.5155  | 5.0970 | 2.4186 |
| 1448656_at   | Cacnb3        | calcium channel, voltage-dependent, beta 3 subunit               | NM_007581 | 8.9645  | 6.5478 | 2.4167 |
| 1416118_at   | Trim59        | tripartite motif-containing 59                                   | NM_025863 | 10.9461 | 8.5309 | 2.4152 |
| 1426516_a_at | Lpin1         | lipin 1                                                          | AK014526  | 9.7562  | 7.3417 | 2.4145 |
| 1428646_at   | Pbx1          | pre B cell leukemia homeobox 1                                   | BG070361  | 7.8245  | 5.4108 | 2.4136 |
| 1452318_a_at | Hspa1b        | heat shock protein 1B                                            | M12573    | 10.3218 | 7.9097 | 2.4121 |
| 1426339_at   | Ak5           | adenylate kinase 5                                               | AB060081  | 7.2340  | 4.8229 | 2.4111 |
| 1453070_at   | Pcdh17        | protocadherin 17                                                 | BB305930  | 8.8070  | 6.4073 | 2.3997 |
| 1429871_at   | Hmmr          | hyaluronan mediated motility receptor (RHAMM)                    | AK020144  | 6.6941  | 4.2966 | 2.3974 |
| 1436866_at   | Efna5         | ephrin A5                                                        | BQ173967  | 9.1207  | 6.7245 | 2.3962 |
| 1445866_at   | Mast4         | microtubule associated serine/threonine kinase family member 4   | BB152945  | 6.4588  | 4.0656 | 2.3932 |
| 1421296_at   | Tnfrsf10b     | tumor necrosis factor receptor superfamily, member 10b           | NM_020275 | 6.8313  | 4.4400 | 2.3913 |
| 1446560_at   | Prss23        | protease, serine, 23                                             | BB084614  | 5.4108  | 3.0227 | 2.3881 |
| 1428415_at   | Rnf113a2      | ring finger protein 113A2                                        | AK009420  | 5.4061  | 3.0227 | 2.3834 |
| 1421856_at   | S100a3        | S100 calcium binding protein A3                                  | AF087470  | 6.8819  | 4.4990 | 2.3829 |
| 1449391_at   | Zfp37         | zinc finger protein 37                                           | NM_009554 | 6.1365  | 3.7657 | 2.3708 |
| 1431430_s_at | Trim59        | tripartite motif-containing 59                                   | AK012269  | 7.7674  | 5.4046 | 2.3627 |
| 1420594_at   | Bard1         | BRCA1 associated RING domain 1                                   | NM_007525 | 7.2340  | 4.8719 | 2.3621 |
| 1439434_x_at | Sh2d5         | SH2 domain containing 5                                          | BB317673  | 6.3315  | 3.9701 | 2.3614 |
| 1416832_at   | Slc39a8       | solute carrier family 39 (metal ion transporter), member 8       | NM_026228 | 6.0270  | 3.6698 | 2.3572 |
| 1421008_at   | Rsad2         | radical S-adenosyl methionine domain containing 2                | BB741897  | 10.9880 | 8.6313 | 2.3567 |
| 1451038_at   | Apln          | apelin                                                           | BB819942  | 7.8757  | 5.5196 | 2.3561 |
| 1419029_at   | Ero1l         | ERO1-like (S. cerevisiae)                                        | BM234652  | 11.6326 | 9.2913 | 2.3414 |
| 1418237_s_at | Col18a1       | collagen, type XVIII, alpha 1                                    | NM_009929 | 10.2864 | 7.9457 | 2.3407 |
| 1438855_x_at | Tnfaip2       | tumor necrosis factor, alpha-induced protein 2                   | BB233088  | 11.2278 | 8.8873 | 2.3405 |
| 1449209_a_at | Rdh11         | retinol dehydrogenase 11                                         | AB030503  | 9.4674  | 7.1280 | 2.3394 |
| 1460173_at   | Lasp1         | LIM and SH3 protein 1                                            | BC010840  | 10.4004 | 8.0618 | 2.3386 |
| 1416483_at   | Ttc3          | tetratricopeptide repeat domain 3                                | BB833716  | 10.3259 | 7.9877 | 2.3382 |
| 1435176_a_at | Id2           | inhibitor of DNA binding 2                                       | BF019883  | 10.2335 | 7.8961 | 2.3374 |
| 1419207_at   | Zfp37         | zinc finger protein 37                                           | NM_009554 | 7.4502  | 5.1134 | 2.3368 |
| 1427257_at   | Vcan          | versican                                                         | BM251152  | 7.2562  | 4.9195 | 2.3367 |
| 1424334_at   | Tspan17       | tetraspanin 17                                                   | BC010346  | 6.8852  | 4.5492 | 2.3360 |
| 1460550_at   | Mtmt11        | myotubularin related protein 11                                  | BE952757  | 8.2925  | 5.9590 | 2.3335 |
| 1417373_a_at | Tuba4a        | tubulin, alpha 4A                                                | AW491660  | 11.8758 | 9.5524 | 2.3234 |
| 1426968_a_at | Rdh10         | retinol dehydrogenase 10 (all-trans)                             | BG073496  | 9.3615  | 7.0394 | 2.3222 |
| 1453156_s_at | Ptgr2         | prostaglandin reductase 2                                        | BE283373  | 5.6980  | 3.3762 | 2.3218 |
| 1442726_s_at | AI845619      | expressed sequence AI845619                                      | AW457339  | 6.6801  | 4.3588 | 2.3213 |

|              |               |                                                                   |           |         |        |        |
|--------------|---------------|-------------------------------------------------------------------|-----------|---------|--------|--------|
| 1450136_at   | Cd38          | CD38 antigen                                                      | NM_007646 | 5.4080  | 3.0872 | 2.3208 |
| 1450678_at   | Itgb2         | integrin beta 2                                                   | NM_008404 | 6.0489  | 3.7308 | 2.3182 |
| 1452415_at   | Actn1         | actinin, alpha 1                                                  | BC003232  | 8.4520  | 6.1404 | 2.3116 |
| 1419358_at   | Sorcs2        | sortilin-related VPS10 domain containing receptor 2               | NM_030889 | 6.2118  | 3.9024 | 2.3094 |
| 1451753_at   | Plxna2        | plexin A2                                                         | D86949    | 6.9720  | 4.6647 | 2.3073 |
| 1456284_at   | Tmem171       | transmembrane protein 171                                         | BB701775  | 8.8196  | 6.5123 | 2.3072 |
| 1439341_at   | Greb1l        | growth regulation by estrogen in breast cancer-like               | BB203252  | 7.1280  | 4.8229 | 2.3051 |
| 1417959_at   | Pdim7         | PDZ and LIM domain 7                                              | NM_026131 | 9.0396  | 6.7365 | 2.3031 |
| 1425598_a_at | Lyn           | Yamaguchi sarcoma viral (v-yes-1) oncogene homolog                | M64608    | 7.4547  | 5.1519 | 2.3028 |
| 1451496_at   | Mtss1         | metastasis suppressor 1                                           | BC024131  | 7.2935  | 4.9912 | 2.3023 |
| 1421161_at   | Btc           | betacellulin, epidermal growth factor family member               | NM_007568 | 5.8149  | 3.5127 | 2.3022 |
| 1417487_at   | Fosl1         | fos-like antigen 1                                                | U34245    | 9.3388  | 7.0394 | 2.2994 |
| 1418288_at   | Lpin1         | lipin 1                                                           | NM_015763 | 9.0739  | 6.7785 | 2.2955 |
| 1451318_a_at | Lyn           | Yamaguchi sarcoma viral (v-yes-1) oncogene homolog                | M57697    | 8.6779  | 6.3829 | 2.2950 |
| 1435479_at   | Bmp7          | bone morphogenetic protein 7                                      | BM055476  | 8.2052  | 5.9142 | 2.2910 |
| 1422601_at   | Serpib9       | serine (or cysteine) peptidase inhibitor, clade B, member 9       | NM_009256 | 7.2542  | 4.9657 | 2.2885 |
| 1426471_at   | Zfp52         | zinc finger protein 52                                            | BM225280  | 10.5054 | 8.2169 | 2.2884 |
| 1458963_at   | Ttc39b        | tetratricopeptide repeat domain 39B                               | BB397062  | 7.5180  | 5.2306 | 2.2873 |
| 1434817_s_at | Rprd2         | regulation of nuclear pre-mRNA domain containing 2                | BM206427  | 9.6096  | 7.3229 | 2.2867 |
| 1453596_at   | Id2           | inhibitor of DNA binding 2                                        | AK013239  | 5.7981  | 3.5127 | 2.2854 |
| 1426098_a_at | Cast          | calpastatin                                                       | AF190152  | 9.4516  | 7.1687 | 2.2830 |
| 1439830_at   | Map3k5        | mitogen-activated protein kinase kinase kinase 5                  | AV377656  | 6.3015  | 4.0213 | 2.2802 |
| 1451435_at   | Cux1          | cut-like homeobox 1                                               | BC014289  | 8.3769  | 6.1005 | 2.2764 |
| 1439255_s_at |               |                                                                   | BB726971  | 9.8184  | 7.5434 | 2.2750 |
| 1422720_at   | Isl1          | ISL1 transcription factor, LIM/homeodomain                        | BQ176915  | 7.4224  | 5.1519 | 2.2705 |
| 1452413_at   | C230081A13Rik | RIKEN cDNA C230081A13 gene                                        | BC026466  | 7.7459  | 5.4771 | 2.2688 |
| 1417013_at   | Hspb8         | heat shock protein 8                                              | AF250139  | 9.4056  | 7.1374 | 2.2681 |
| 1416598_at   | Glis2         | GLIS family zinc finger 2                                         | NM_031184 | 8.9094  | 6.6421 | 2.2674 |
| 1420664_s_at | Procr         | protein C receptor, endothelial                                   | NM_011171 | 8.4074  | 6.1404 | 2.2670 |
| 1451977_at   | Dyrk1a        | dual-specificity tyrosine-(Y)-phosphorylation regulated kinase 1a | U58497    | 7.7961  | 5.5314 | 2.2647 |
| 1420160_s_at | Myo1e         | myosin IE                                                         | AA407778  | 9.2464  | 6.9818 | 2.2646 |
| 1428758_at   | Tmem86a       | transmembrane protein 86A                                         | AK007864  | 7.9033  | 5.6402 | 2.2631 |
| 1422054_a_at | Skil          | SKI-like                                                          | U36203    | 6.0270  | 3.7657 | 2.2613 |
| 1439493_at   | Zfp827        | zinc finger protein 827                                           | BB111712  | 5.4116  | 3.1525 | 2.2591 |
| 1453269_at   | Unc5b         | unc-5 homolog B (C. elegans)                                      | AK018177  | 8.4946  | 6.2392 | 2.2554 |
| 1425272_at   | Emp2          | epithelial membrane protein 2                                     | AF083876  | 9.0165  | 6.7753 | 2.2411 |
| 1441749_at   | 4930447F24Rik | RIKEN cDNA 4930447F24 gene                                        | BB796499  | 8.2254  | 5.9851 | 2.2403 |
| 1437404_at   | Mast4         | microtubule associated serine/threonine kinase family member 4    | AI642422  | 7.0126  | 4.7725 | 2.2400 |
| 1429168_at   | Zbtb46        | zinc finger and BTB domain containing 46                          | AK011461  | 6.4731  | 4.2333 | 2.2398 |
| 1439888_at   | Gm15867       | predicted gene 15867                                              | BB271581  | 5.8204  | 3.5815 | 2.2390 |
| 1418460_at   | Sh3d19        | SH3 domain protein D19                                            | NM_012059 | 6.7928  | 4.5566 | 2.2362 |
| 1453724_a_at | Serpinf1      | serine (or cysteine) peptidase inhibitor, clade F, member 1       | AK012411  | 9.6941  | 7.4602 | 2.2340 |
| 1449036_at   | Rnf128        | ring finger protein 128                                           | AK004847  | 8.3497  | 6.1198 | 2.2298 |
| 1452367_at   | Coro2a        | coronin, actin binding protein 2A                                 | AI316747  | 6.8186  | 4.5892 | 2.2293 |
| 1429479_at   | Magef1        | melanoma antigen family F, 1                                      | AK018285  | 7.3026  | 5.0740 | 2.2286 |
| 1448558_a_at | Pla2g4a       | phospholipase A2, group IVA (cytosolic, calcium-dependent)        | NM_008869 | 10.6569 | 8.4299 | 2.2269 |
| 1441940_x_at | Klhdc8a       | kelch domain containing 8A                                        | BB180603  | 7.3238  | 5.0970 | 2.2269 |
| 1455470_x_at | Lasp1         | LIM and SH3 protein 1                                             | AV027151  | 11.4323 | 9.2085 | 2.2239 |
| 1419322_at   | Fgd6          | FYVE, RhoGEF and PH domain containing 6                           | NM_053072 | 7.6316  | 5.4108 | 2.2208 |
| 1423869_s_at | Txnrd3        | thioredoxin reductase 3                                           | AF349659  | 7.1823  | 4.9657 | 2.2166 |
| 1418046_at   | Nap1l2        | nucleosome assembly protein 1-like 2                              | NM_008671 | 5.2389  | 3.0227 | 2.2162 |
| 1442187_at   | Bdkrb2        | bradykinin receptor, beta 2                                       | AW490711  | 5.9119  | 3.6957 | 2.2162 |
| 1452214_at   | Skil          | SKI-like                                                          | AK018608  | 10.7391 | 8.5231 | 2.2160 |
| 1417985_at   | Nrarp         | Notch-regulated ankyrin repeat protein                            | BI696369  | 6.9879  | 4.7725 | 2.2154 |
| 1416273_at   | Tnfaip2       | tumor necrosis factor, alpha-induced protein 2                    | NM_009396 | 10.2489 | 8.0346 | 2.2143 |
| 1451190_a_at | Sbk1          | SH3-binding kinase 1                                              | BC025837  | 7.1763  | 4.9626 | 2.2137 |
| 1434582_at   | Erc2          | ELKS/RAB6-interacting/CAST family member 2                        | AV173869  | 5.8041  | 3.5905 | 2.2137 |

|              |               |                                                                          |           |         |        |        |
|--------------|---------------|--------------------------------------------------------------------------|-----------|---------|--------|--------|
| 1417374_at   | Tuba4a        | tubulin, alpha 4A                                                        | AW491660  | 10.6208 | 8.4074 | 2.2133 |
| 1427133_s_at | Lrp2          | low density lipoprotein receptor-related protein 2                       | C80829    | 5.4982  | 3.2854 | 2.2128 |
| 1452240_at   | Celf4         | CUGBP, Elav-like family member 4                                         | AV327653  | 9.4105  | 7.2054 | 2.2052 |
| 1418072_at   | Hist1h2bc     | histone cluster 1, H2bc                                                  | NM_023422 | 8.8240  | 6.6226 | 2.2015 |
| 1422982_at   | Ar            | androgen receptor                                                        | NM_013476 | 7.0210  | 4.8229 | 2.1981 |
| 1427429_at   | Csf2          | colony stimulating factor 2 (granulocyte-macrophage)                     | X03019    | 5.9590  | 3.7657 | 2.1933 |
| 1426569_a_at | Frk           | fyn-related kinase                                                       | BB787292  | 5.8411  | 3.6503 | 2.1908 |
| 1438954_x_at | Figf          | c-fos induced growth factor                                              | BB359521  | 6.5477  | 4.3588 | 2.1889 |
| 1436895_at   | Arap2         | ArfGAP with RhoGAP domain, ankyrin repeat and PH domain 2                | BB182934  | 7.1687  | 4.9818 | 2.1869 |
| 1443117_at   | Eya1          | eyes absent 1 homolog (Drosophila)                                       | BB298032  | 5.4720  | 3.2854 | 2.1866 |
| 1433930_at   | Hpse          | heparanase                                                               | BG094050  | 9.8455  | 7.6597 | 2.1858 |
| 1434939_at   | Foxf1         | forkhead box F1                                                          | BB437522  | 9.8599  | 7.6752 | 2.1846 |
| 1424793_a_at | Pbp2          | phosphatidylethanolamine binding protein 2                               | AF307146  | 6.3416  | 4.1571 | 2.1845 |
| 1441973_at   | Zfp295        | zinc finger protein 295                                                  | BB091040  | 6.4791  | 4.2966 | 2.1825 |
| 1438221_at   |               |                                                                          | AI875682  | 9.0257  | 6.8439 | 2.1818 |
| 1453293_a_at | 2810408A11Rik | RIKEN cDNA 2810408A11 gene                                               | AK015537  | 5.9462  | 3.7658 | 2.1804 |
| 1450017_at   | Ccng1         | cyclin G1                                                                | BG065754  | 8.9548  | 6.7753 | 2.1795 |
| 1448361_at   | Ttc3          | tetratricopeptide repeat domain 3                                        | BB833716  | 10.9565 | 8.7788 | 2.1777 |
| 1427385_s_at | Actn1         | actinin, alpha 1                                                         | BC003232  | 6.7880  | 4.6127 | 2.1753 |
| 1438783_at   |               |                                                                          | BB325257  | 7.0422  | 4.8719 | 2.1703 |
| 1457779_at   | 1110046J04Rik | RIKEN cDNA 1110046J04 gene                                               | AV013305  | 7.9093  | 5.7391 | 2.1702 |
| 1429777_at   | Dnajb6        | DnaJ (Hsp40) homolog, subfamily B, member 6                              | AK005680  | 8.4074  | 6.2392 | 2.1682 |
| 1434974_at   | Pdk1          | pyruvate dehydrogenase kinase, isoenzyme 1                               | BB391928  | 6.2040  | 4.0372 | 2.1668 |
| 1448494_at   | Gas1          | growth arrest specific 1                                                 | BB550400  | 5.5423  | 3.3762 | 2.1661 |
| 1421207_at   | Lif           | leukemia inhibitory factor                                               | AF065917  | 7.4693  | 5.3054 | 2.1639 |
| 1424452_at   | Sltm          | SAFB-like, transcription modulator                                       | BC019992  | 12.0501 | 9.8936 | 2.1565 |
| 1438441_at   |               |                                                                          | AI323288  | 5.1786  | 3.0227 | 2.1559 |
| 1449949_a_at | Cxadr         | coxsackie virus and adenovirus receptor                                  | U90715    | 6.7079  | 4.5566 | 2.1514 |
| 1418441_at   | Col8a1        | collagen, type VIII, alpha 1                                             | NM_007739 | 6.0489  | 3.9024 | 2.1465 |
| 1435162_at   | Prkg2         | protein kinase, cGMP-dependent, type II                                  | BB823350  | 11.7590 | 9.6126 | 2.1464 |
| 1452589_at   | Ptk7          | PTK7 protein tyrosine kinase 7                                           | AK018379  | 7.4502  | 5.3054 | 2.1448 |
| 1455405_at   | Pstpip2       | proline-serine-threonine phosphatase-interacting protein 2               | AV229693  | 5.8877  | 3.7431 | 2.1446 |
| 1458742_at   | Lphn3         | latrophilin 3                                                            | BB317079  | 5.7245  | 3.5815 | 2.1431 |
| 1426271_at   | Smc5          | structural maintenance of chromosomes 5                                  | AV257384  | 9.7117  | 7.5689 | 2.1428 |
| 1419044_at   | Cntnap4       | contactin associated protein-like 4                                      | NM_130457 | 5.7899  | 3.6503 | 2.1396 |
| 1418936_at   | Maff          | v-maf musculoaponeurotic fibrosarcoma oncogene family, protein F (avian) | BC022952  | 10.3727 | 8.2362 | 2.1365 |
| 1416700_at   | Rnd3          | Rho family GTPase 3                                                      | BC009002  | 8.8914  | 6.7617 | 2.1297 |
| 1420641_a_at | Sqrdl         | sulfide quinone reductase-like (yeast)                                   | AF174535  | 9.0549  | 6.9252 | 2.1297 |
| 1435234_at   | Ncoa2         | nuclear receptor coactivator 2                                           | BM234716  | 8.2023  | 6.0735 | 2.1288 |
| 1429029_at   | Sgms2         | sphingomyelin synthase 2                                                 | AK016659  | 6.4243  | 4.2966 | 2.1277 |
| 1439256_x_at | Gpr137b-ps    | G protein-coupled receptor 137B, pseudogene                              | BB726971  | 9.8505  | 7.7229 | 2.1276 |
| 1416701_at   | Rnd3          | Rho family GTPase 3                                                      | BC009002  | 7.7339  | 5.6064 | 2.1275 |
| 1428396_at   | Smurf1        | SMAD specific E3 ubiquitin protein ligase 1                              | BB832916  | 7.2783  | 5.1519 | 2.1264 |
| 1459354_at   |               |                                                                          | AV264369  | 5.4108  | 3.2854 | 2.1254 |
| 1419457_at   | Rgnef         | Rho-guanine nucleotide exchange factor                                   | BG069493  | 6.7002  | 4.5753 | 2.1249 |
| 1459552_at   | D4Bwg0951e    | DNA segment, Chr 4, Brigham & Women's Genetics 0951 expressed            | BB404047  | 5.4958  | 3.3762 | 2.1196 |
| 1420159_at   | Myo1e         | myosin IE                                                                | AA407778  | 9.3870  | 7.2694 | 2.1176 |
| 1447242_at   |               |                                                                          | BG092767  | 6.6416  | 4.5275 | 2.1141 |
| 1416067_at   | Ifrd1         | interferon-related developmental regulator 1                             | NM_013562 | 11.7474 | 9.6370 | 2.1104 |
| 1422632_at   | Ctsw          | cathepsin W                                                              | NM_009985 | 7.0729  | 4.9657 | 2.1072 |
| 1460378_a_at | Tes           | testis derived transcript                                                | BC010465  | 11.2309 | 9.1238 | 2.1071 |
| 1420499_at   | Gch1          | GTP cyclohydrolase 1                                                     | NM_008102 | 10.0289 | 7.9233 | 2.1056 |
| 1416041_at   | Sgk1          | serum/glucocorticoid regulated kinase 1                                  | NM_011361 | 10.8646 | 8.7611 | 2.1035 |
| 1436999_at   | Pid1          | phosphotyrosine interaction domain containing 1                          | AI504908  | 6.1404  | 4.0372 | 2.1032 |
| 1427277_at   | Six1          | sine oculis-related homeobox 1                                           | BB137929  | 7.0217  | 4.9195 | 2.1023 |
| 1434739_at   | Fmr1nb        | fragile X mental retardation 1 neighbor                                  | AW542416  | 6.0047  | 3.9024 | 2.1023 |
| 1426852_x_at | Nov           | nephroblastoma overexpressed gene                                        | X96585    | 5.5908  | 3.4898 | 2.1009 |
| 1420891_at   | Wnt7b         | wingless-related MMTV integration site 7B                                | W29605    | 6.2041  | 4.1035 | 2.1006 |
| 1452291_at   | Arap2         | ArfGAP with RhoGAP domain, ankyrin repeat and PH domain 2                | AV375176  | 9.5223  | 7.4248 | 2.0975 |
| 1452908_at   | Dip2a         | DIP2 disco-interacting protein 2 homolog A (Drosophila)                  | BB794700  | 10.2729 | 8.1757 | 2.0973 |
| 1417401_at   | Rai14         | retinoic acid induced 14                                                 | NM_030690 | 8.5541  | 6.4574 | 2.0967 |



|              |               |                                                                                                                                             |           |         |         |        |
|--------------|---------------|---------------------------------------------------------------------------------------------------------------------------------------------|-----------|---------|---------|--------|
| 1428058_at   | Ahnak         | AHNAK nucleoprotein (desmoyokin)                                                                                                            | BC028439  | 7.6159  | 5.5196  | 2.0962 |
| 1421378_s_at | Abcc1         | ATP-binding cassette, sub-family C (CFTR/MRP), member 1                                                                                     | NM_008576 | 8.9924  | 6.8966  | 2.0958 |
| 1448390_a_at | Dhrs3         | dehydrogenase/reductase (SDR family) member 3                                                                                               | NM_011303 | 8.0903  | 5.9961  | 2.0942 |
| 1421141_a_at | Foxp1         | forkhead box P1                                                                                                                             | BG962849  | 9.4489  | 7.3563  | 2.0926 |
| 1456545_at   | Il18rap       | interleukin 18 receptor accessory protein                                                                                                   | AV247387  | 7.7316  | 5.6402  | 2.0914 |
| 1426955_at   | Col18a1       | collagen, type XVIII, alpha 1                                                                                                               | D17546    | 10.2123 | 8.1217  | 2.0906 |
| 1424528_at   | Cgref1        | cell growth regulator with EF hand domain 1                                                                                                 | BC023116  | 7.9747  | 5.8853  | 2.0894 |
| 1439352_at   | Trim7         | tripartite motif-containing 7                                                                                                               | BB825733  | 5.7565  | 3.6702  | 2.0863 |
| 1416484_at   | Ttc3          | tetratricopeptide repeat domain 3                                                                                                           | BB833716  | 8.3846  | 6.3015  | 2.0831 |
| 1435671_at   | Mipol1        | mirror-image polydactyly gene 1 homolog (human)                                                                                             | BB526605  | 8.4581  | 6.3756  | 2.0826 |
| 1436820_at   | Kctd11        | potassium channel tetramerisation domain containing 11                                                                                      | BB826401  | 8.5884  | 6.5058  | 2.0826 |
| 1417707_at   | N4bp2l1       | NEDD4 binding protein 2-like 1                                                                                                              | NM_133898 | 5.9820  | 3.9024  | 2.0796 |
| 1420425_at   | Prdm1         | PR domain containing 1, with ZNF domain                                                                                                     | NM_007548 | 5.3644  | 3.2861  | 2.0783 |
| 1417316_at   | Acot13        | acyl-CoA thioesterase 13                                                                                                                    | NM_025790 | 10.9343 | 8.8566  | 2.0778 |
| 1419030_at   | Ero1l         | ERO1-like (S. cerevisiae)                                                                                                                   | BM234652  | 10.2127 | 8.1355  | 2.0772 |
| 1440559_at   | Hmga2-ps1     | high mobility group AT-hook 2, pseudogene 1                                                                                                 | AV377334  | 6.3703  | 4.2966  | 2.0736 |
| 1417014_at   | Hspb8         | heat shock protein 8                                                                                                                        | AF250139  | 7.9326  | 5.8632  | 2.0695 |
| 1441536_at   | Hmgcs1        | 3-hydroxy-3-methylglutaryl-Coenzyme A synthase 1                                                                                            | AV362707  | 6.8402  | 4.7725  | 2.0677 |
| 1448350_at   | Asl           | argininosuccinate lyase                                                                                                                     | NM_133768 | 8.5770  | 6.5105  | 2.0664 |
| 1425553_s_at | Hip1r         | huntingtin interacting protein 1 related                                                                                                    | AA590970  | 8.4564  | 6.3902  | 2.0663 |
| 1416627_at   | Spint1        | serine protease inhibitor, Kunitz type 1                                                                                                    | NM_016907 | 5.7152  | 3.6503  | 2.0649 |
| 1426024_a_at | Dbn1          | drebrin 1                                                                                                                                   | AF187147  | 8.9190  | 6.8564  | 2.0625 |
| 1427541_x_at | Hmmr          | hyaluronan mediated motility receptor (RHAMM)                                                                                               | X64550    | 7.9979  | 5.9357  | 2.0623 |
| 1440493_at   | Galnt10       | UDP-N-acetyl-alpha-D-galactosamine:polypeptide N-acetylgalactosaminyltransferase 10                                                         | BB399121  | 7.7451  | 5.6839  | 2.0612 |
| 1429692_s_at | Gch1          | GTP cyclohydrolase 1                                                                                                                        | BB698398  | 8.0093  | 5.9500  | 2.0593 |
| 1416039_x_at | Cyr61         | cysteine rich protein 61                                                                                                                    | NM_010516 | 11.6630 | 9.6042  | 2.0588 |
| 1426476_at   | Rasa1         | RAS p21 protein activator 1                                                                                                                 | AA124924  | 10.7702 | 8.7127  | 2.0576 |
| 1443254_at   |               |                                                                                                                                             | BB448273  | 5.6689  | 3.6129  | 2.0560 |
| 1459824_at   | Smarcc1       | SWI/SNF related, matrix associated, actin dependent regulator of chromatin, subfamily c, member 1                                           | BB286894  | 5.4992  | 3.4443  | 2.0550 |
| 1416111_at   | Cd83          | CD83 antigen                                                                                                                                | NM_009856 | 5.8204  | 3.7657  | 2.0546 |
| 1425847_a_at | B230120H23Rik | RIKEN cDNA B230120H23 gene                                                                                                                  | AB049732  | 5.4982  | 3.4443  | 2.0539 |
| 1418649_at   | Egln3         | EGL nine homolog 3 (C. elegans)                                                                                                             | BB284358  | 9.4880  | 7.4364  | 2.0516 |
| 1422167_at   | Sema5a        | sema domain, seven thrombospondin repeats (type 1 and type 1-like), transmembrane domain (TM) and short cytoplasmic domain, (semaphorin) 5A | NM_009154 | 5.1383  | 3.0872  | 2.0511 |
| 1429091_at   | 1600002K03Rik | RIKEN cDNA 1600002K03 gene                                                                                                                  | BF682507  | 6.8234  | 4.7725  | 2.0509 |
| 1420827_a_at | Ccng1         | cyclin G1                                                                                                                                   | BG065754  | 10.7067 | 8.6566  | 2.0501 |
| 1455970_at   | Pde5a         | phosphodiesterase 5A, cGMP-specific                                                                                                         | BE370618  | 5.2685  | 3.2186  | 2.0499 |
| 1435460_at   | Prkg2         | protein kinase, cGMP-dependent, type II                                                                                                     | BB363188  | 11.9236 | 9.8761  | 2.0475 |
| 1424649_a_at | Tspan8        | tetraspanin 8                                                                                                                               | BC025461  | 5.6110  | 3.5644  | 2.0466 |
| 1424088_at   | Myg1          | melanocyte proliferating gene 1                                                                                                             | AF289484  | 10.2190 | 8.1726  | 2.0464 |
| 1426929_at   | Celf4         | CUGBP, Elav-like family member 4                                                                                                            | AV327653  | 9.3935  | 7.3506  | 2.0429 |
| 1423836_at   | Zfp503        | zinc finger protein 503                                                                                                                     | BB447914  | 5.8735  | 3.8342  | 2.0392 |
| 1420413_at   | Slc7a11       | solute carrier family 7 (cationic amino acid transporter, y+ system), member 11                                                             | NM_011990 | 7.4140  | 5.3765  | 2.0374 |
| 1460555_at   | Fam65b        | family with sequence similarity 65, member B                                                                                                | BM242294  | 7.3417  | 5.3054  | 2.0363 |
| 1416537_at   | Creld1        | cysteine-rich with EGF-like domains 1                                                                                                       | NM_133930 | 9.6201  | 7.5840  | 2.0361 |
| 1457823_at   | Cyr61         | cysteine rich protein 61                                                                                                                    | BB533736  | 11.7284 | 9.6929  | 2.0356 |
| 1449634_a_at | Anks1b        | ankyrin repeat and sterile alpha motif domain containing 1B                                                                                 | AW046296  | 5.9154  | 3.8803  | 2.0351 |
| 1422544_at   | Myo10         | myosin X                                                                                                                                    | AV297945  | 8.4742  | 6.4394  | 2.0348 |
| 1438444_at   | Spink10       | serine peptidase inhibitor, Kazal type 10                                                                                                   | AV381832  | 5.8675  | 3.8342  | 2.0332 |
| 1455870_at   | Akap2         | A kinase (PRKA) anchor protein 2                                                                                                            | AI649048  | 9.5916  | 7.5587  | 2.0329 |
| 1460619_at   | Mfsd9         | major facilitator superfamily domain containing 9                                                                                           | AU067683  | 6.2200  | 4.1904  | 2.0296 |
| 1418383_at   | Apcdd1        | adenomatous polyposis coli down-regulated 1                                                                                                 | BB770932  | 5.6109  | 3.5815  | 2.0294 |
| 1438634_x_at | Lasp1         | LIM and SH3 protein 1                                                                                                                       | BB105164  | 12.1139 | 10.0845 | 2.0294 |
| 1424669_at   | Zfyve21       | zinc finger, FYVE domain containing 21                                                                                                      | BC019521  | 8.3585  | 6.3376  | 2.0208 |
| 1448355_at   | Prss16        | protease, serine, 16 (thymus)                                                                                                               | NM_019429 | 6.9835  | 4.9657  | 2.0177 |
| 1419705_at   | Car5b         | carbonic anhydrase 5b, mitochondrial                                                                                                        | NM_019513 | 8.5894  | 6.5730  | 2.0164 |

|              |               |                                                                                                                                             |           |         |        |        |
|--------------|---------------|---------------------------------------------------------------------------------------------------------------------------------------------|-----------|---------|--------|--------|
| 1434674_at   | Lyst          | lysosomal trafficking regulator                                                                                                             | BB463428  | 8.7092  | 6.6941 | 2.0152 |
| 1418461_at   | Sh3d19        | SH3 domain protein D19                                                                                                                      | NM_012059 | 7.9501  | 5.9357 | 2.0144 |
| 1441997_at   | Zfp184        | zinc finger protein 184 (Kruppel-like)                                                                                                      | BB129967  | 6.3481  | 4.3358 | 2.0123 |
| 1417129_a_at | Meis2         | Meis homeobox 2                                                                                                                             | U68384    | 9.0558  | 7.0436 | 2.0122 |
| 1442340_x_at | Cyr61         | cysteine rich protein 61                                                                                                                    | BB533736  | 11.6675 | 9.6621 | 2.0054 |
| 1460589_at   | Zfp597        | zinc finger protein 597                                                                                                                     | AV270881  | 6.3015  | 4.2966 | 2.0049 |
| 1460220_a_at | Csf1          | colony stimulating factor 1 (macrophage)                                                                                                    | BM233698  | 10.3530 | 8.3518 | 2.0012 |
| 1430826_s_at | Gcnt2         | glucosaminyl (N-acetyl) transferase 2, l-branching enzyme                                                                                   | AK019924  | 5.5823  | 3.5815 | 2.0009 |
| 1434874_x_at | Acap1         | ArfGAP with coiled-coil, ankyrin repeat and PH domains 1                                                                                    | BB115902  | 6.4409  | 4.4400 | 2.0009 |
| 1449073_at   | Finc          | filamin C, gamma                                                                                                                            | NM_026839 | 8.2311  | 6.2311 | 2.0001 |
| 1434526_at   | Ephx4         | epoxide hydrolase 4                                                                                                                         | BB175669  | 5.2265  | 3.2325 | 1.9940 |
| 1451566_at   | Zfp810        | zinc finger protein 810                                                                                                                     | BC005471  | 5.3394  | 3.3477 | 1.9917 |
| 1431032_at   | Agl           | amylase-1,6-glucosidase, 4-alpha-glucanotransferase                                                                                         | AA681807  | 8.8493  | 6.8576 | 1.9917 |
| 1454906_at   | Rarb          | retinoic acid receptor, beta                                                                                                                | BB266455  | 5.6402  | 3.6503 | 1.9899 |
| 1434333_a_at | Prkd2         | protein kinase D2                                                                                                                           | AW557946  | 6.3197  | 4.3329 | 1.9868 |
| 1441573_at   | Scmh1         | sex comb on midleg homolog 1                                                                                                                | BB297140  | 5.7245  | 3.7389 | 1.9856 |
| 1416368_at   | Gsta4         | glutathione S-transferase, alpha 4                                                                                                          | NM_010357 | 7.9141  | 5.9290 | 1.9852 |
| 1440972_at   | Nsd1          | nuclear receptor-binding SET-domain protein 1                                                                                               | AI413236  | 5.5660  | 3.5815 | 1.9846 |
| 1417790_at   | Dok1          | docking protein 1                                                                                                                           | BC013066  | 9.6179  | 7.6341 | 1.9838 |
| 1429005_at   | Mfhas1        | malignant fibrous histiocytoma amplified sequence 1                                                                                         | BB107412  | 9.8469  | 7.8634 | 1.9834 |
| 1457020_at   |               |                                                                                                                                             | BB534501  | 6.7665  | 4.7832 | 1.9834 |
| 1450700_at   | Cdc42ep3      | CDC42 effector protein (Rho GTPase binding) 3                                                                                               | BB012489  | 7.5621  | 5.5812 | 1.9809 |
| 1448541_at   | Klc1          | kinesin light chain 1                                                                                                                       | AU079968  | 6.5371  | 4.5566 | 1.9805 |
| 1460204_at   | Tec           | tec protein tyrosine kinase                                                                                                                 | NM_013689 | 7.2855  | 5.3054 | 1.9801 |
| 1441968_at   | Tspan9        | tetraspanin 9                                                                                                                               | BB101988  | 7.7836  | 5.8041 | 1.9795 |
| 1436066_at   | Kalrn         | kalirin, RhoGEF kinase                                                                                                                      | BI965477  | 5.0007  | 3.0227 | 1.9780 |
| 1422138_at   | Plau          | plasminogen activator, urokinase                                                                                                            | NM_008873 | 6.0270  | 4.0503 | 1.9767 |
| 1426538_a_at | Trp53         | transformation related protein 53                                                                                                           | BB828014  | 8.4595  | 6.4838 | 1.9757 |
| 1424938_at   | Steap1        | six transmembrane epithelial antigen of the prostate 1                                                                                      | AF297098  | 9.2091  | 7.2335 | 1.9757 |
| 1437422_at   | Sema5a        | sema domain, seven thrombospondin repeats (type 1 and type 1-like), transmembrane domain (TM) and short cytoplasmic domain, (semaphorin) 5A | AV375653  | 5.3552  | 3.3797 | 1.9755 |
| 1430623_s_at | Nabp1         | nucleic acid binding protein 1                                                                                                              | AV263881  | 6.5871  | 4.6127 | 1.9744 |
| 1447807_s_at | Plekhh1       | pleckstrin homology domain containing, family H (with MyTH4 domain) member 1                                                                | AV336001  | 6.9835  | 5.0107 | 1.9728 |
| 1438724_at   | Osbpl3        | oxysterol binding protein-like 3                                                                                                            | AI875442  | 6.3376  | 4.3650 | 1.9726 |
| 1419458_at   | Rgnef         | Rho-guanine nucleotide exchange factor                                                                                                      | BG069493  | 5.5535  | 3.5815 | 1.9720 |
| 1423389_at   | Smad7         | SMAD family member 7                                                                                                                        | BF226166  | 8.3605  | 6.3902 | 1.9703 |
| 1421430_at   | Rad5111       | RAD51-like 1 (S. cerevisiae)                                                                                                                | NM_009014 | 7.6211  | 5.6528 | 1.9683 |
| 1444418_at   | Itpr2         | inositol 1,4,5-triphosphate receptor 2                                                                                                      | BM225081  | 5.5282  | 3.5622 | 1.9660 |
| 1458894_at   |               |                                                                                                                                             | BB404534  | 6.0015  | 4.0372 | 1.9644 |
| 1426750_at   | Flnb          | filamin, beta                                                                                                                               | AW538200  | 10.4048 | 8.4424 | 1.9624 |
| 1420911_a_at | Mfge8         | milk fat globule-EGF factor 8 protein                                                                                                       | NM_008594 | 10.7827 | 8.8208 | 1.9619 |
| 1426477_at   | Rasa1         | RAS p21 protein activator 1                                                                                                                 | AA124924  | 10.4445 | 8.4834 | 1.9612 |
| 1430159_at   | 5830408C22Rik | RIKEN cDNA 5830408C22 gene                                                                                                                  | BF658932  | 6.0642  | 4.1035 | 1.9607 |
| 1425612_at   | Cux1          | cut-like homeobox 1                                                                                                                         | AA023906  | 5.1786  | 3.2186 | 1.9600 |
| 1425767_a_at | Six4          | sine oculis-related homeobox 4                                                                                                              | D50416    | 8.3672  | 6.4073 | 1.9600 |
| 1455121_at   | Lcor          | ligand dependent nuclear receptor corepressor                                                                                               | BB553784  | 7.7253  | 5.7665 | 1.9588 |
| 1447861_x_at | Meis2         | Meis homeobox 2                                                                                                                             | AV329643  | 7.5689  | 5.6110 | 1.9579 |
| 1438133_a_at | Cyr61         | cysteine rich protein 61                                                                                                                    | BM202770  | 11.3822 | 9.4295 | 1.9527 |
| 1425611_a_at | Cux1          | cut-like homeobox 1                                                                                                                         | AA023906  | 7.7858  | 5.8382 | 1.9476 |
| 1417207_at   | Dvl2          | dishevelled 2, dsh homolog (Drosophila)                                                                                                     | BF466091  | 8.5490  | 6.6030 | 1.9460 |
| 1447063_at   | 1700017B05Rik | RIKEN cDNA 1700017B05 gene                                                                                                                  | BB273020  | 5.9998  | 4.0545 | 1.9453 |
| 1424246_a_at | Tes           | testis derived transcript                                                                                                                   | BC003808  | 11.5986 | 9.6538 | 1.9448 |
| 1441743_at   | Pax3          | paired box gene 3                                                                                                                           | BB759978  | 8.2643  | 6.3197 | 1.9446 |
| 1453540_at   | 5430404G13Rik | RIKEN cDNA 5430404G13 gene                                                                                                                  | BM218780  | 5.0970  | 3.1525 | 1.9445 |
| 1439034_at   | Spn           | sialoporphin                                                                                                                                | BB160586  | 6.1125  | 4.1689 | 1.9436 |
| 1456257_at   |               |                                                                                                                                             | BG070093  | 8.3989  | 6.4574 | 1.9415 |
| 1450744_at   | Ell2          | elongation factor RNA polymerase II 2                                                                                                       | NM_138953 | 8.1009  | 6.1607 | 1.9402 |
| 1450650_at   | Myo10         | myosin X                                                                                                                                    | AV297945  | 9.6947  | 7.7565 | 1.9382 |
| 1448742_at   | Snai1         | snail homolog 1 (Drosophila)                                                                                                                | NM_011427 | 5.5190  | 3.5815 | 1.9375 |

|              |               |                                                                                                 |           |         |        |        |
|--------------|---------------|-------------------------------------------------------------------------------------------------|-----------|---------|--------|--------|
| 1417149_at   | P4ha2         | procollagen-proline, 2-oxoglutarate 4-dioxygenase (proline 4-hydroxylase), alpha II polypeptide | NM_011031 | 10.1675 | 8.2314 | 1.9361 |
| 1422912_at   | Bmp4          | bone morphogenetic protein 4                                                                    | NM_007554 | 6.7079  | 4.7725 | 1.9354 |
| 1423581_at   | Nmt2          | N-myristoyltransferase 2                                                                        | AI503912  | 9.2653  | 7.3328 | 1.9325 |
| 1431050_at   | Rps6ka5       | ribosomal protein S6 kinase, polypeptide 5                                                      | BE291900  | 6.7048  | 4.7725 | 1.9323 |
| 1429772_at   | Plxna2        | plexin A2                                                                                       | BB085537  | 5.7655  | 3.8342 | 1.9313 |
| 1424443_at   | Tm6sf1        | transmembrane 6 superfamily member 1                                                            | AV378394  | 5.7781  | 3.8472 | 1.9309 |
| 1426284_at   | Krt20         | keratin 20                                                                                      | AF473907  | 5.5812  | 3.6503 | 1.9309 |
| 1451723_at   | Cnot6l        | CCR4-NOT transcription complex, subunit 6-like                                                  | BC018506  | 7.7336  | 5.8041 | 1.9295 |
| 1418253_a_at | Hspa4l        | heat shock protein 4 like                                                                       | NM_011020 | 10.6569 | 8.7275 | 1.9294 |
| 1435968_at   | Ptpn2         | protein tyrosine phosphatase, receptor type, N polypeptide 2                                    | BI794694  | 5.8301  | 3.9024 | 1.9277 |
| 1426640_s_at | Trib2         | tribbles homolog 2 (Drosophila)                                                                 | BB354684  | 9.1337  | 7.2089 | 1.9248 |
| 1444754_at   | Asxl2         | additional sex combs like 2 (Drosophila)                                                        | BB761239  | 6.0270  | 4.1035 | 1.9235 |
| 1454809_at   | Ncoa7         | nuclear receptor coactivator 7                                                                  | BE686893  | 9.7033  | 7.7805 | 1.9228 |
| 1428801_at   | Mgat3         | mannoside acetylglucosaminyltransferase 3                                                       | BB283751  | 7.1910  | 5.2685 | 1.9225 |
| 1456862_at   | Six4          | sine oculis-related homeobox 4                                                                  | AI893638  | 8.6903  | 6.7706 | 1.9197 |
| 1438021_at   | Rbm47         | RNA binding motif protein 47                                                                    | BB400564  | 5.9068  | 3.9871 | 1.9197 |
| 1457632_s_at | Meis2         | Meis homeobox 2                                                                                 | BB207647  | 9.1920  | 7.2724 | 1.9196 |
| 1426472_at   | Zfp52         | zinc finger protein 52                                                                          | BM225280  | 5.8274  | 3.9126 | 1.9148 |
| 1452593_a_at | Tceb1         | transcription elongation factor B (SIII), polypeptide 1                                         | AI019214  | 6.2443  | 4.3299 | 1.9145 |
| 1452366_at   | Csgalnact1    | chondroitin sulfate N-acetylgalactosaminyltransferase 1                                         | AV371987  | 6.2289  | 4.3171 | 1.9118 |
| 1439753_x_at | Six4          | sine oculis-related homeobox 4                                                                  | AI893638  | 8.8303  | 6.9194 | 1.9109 |
| 1428604_at   | 2610305D13Rik | RIKEN cDNA 2610305D13 gene                                                                      | AK011986  | 6.7353  | 4.8270 | 1.9083 |
| 1426478_at   | Rasa1         | RAS p21 protein activator 1                                                                     | AA124924  | 8.4914  | 6.5832 | 1.9082 |
| 1440285_at   | Ppp1r9a       | protein phosphatase 1, regulatory (inhibitor) subunit 9A                                        | BF472950  | 5.1261  | 3.2186 | 1.9075 |
| 1428983_at   | Scx           | scleraxis                                                                                       | AW124134  | 7.4883  | 5.5812 | 1.9071 |
| 1449078_at   | St3gal6       | ST3 beta-galactoside alpha-2,3-sialyltransferase 6                                              | NM_018784 | 7.7431  | 5.8382 | 1.9049 |
| 1452385_at   | Usp53         | ubiquitin specific peptidase 53                                                                 | BG076275  | 8.0850  | 6.1807 | 1.9043 |
| 1422537_a_at | Id2           | inhibitor of DNA binding 2                                                                      | NM_010496 | 10.0203 | 8.1171 | 1.9032 |
| 1422075_at   | Cdx2          | caudal type homeobox 2                                                                          | NM_007673 | 6.3401  | 4.4400 | 1.9001 |
| 1440874_at   | Slco5a1       | solute carrier organic anion transporter family, member 5A1                                     | BE686667  | 5.8689  | 3.9701 | 1.8988 |
| 1435436_at   | Epas1         | endothelial PAS domain protein 1                                                                | BI647951  | 5.8400  | 3.9426 | 1.8974 |
| 1425503_at   | Gcnt2         | glucosaminyl (N-acetyl) transferase 2, 1-branching enzyme                                       | AB037596  | 8.6422  | 6.7465 | 1.8957 |
| 1424670_s_at | Zfyve21       | zinc finger, FYVE domain containing 21                                                          | BC019521  | 9.8235  | 7.9284 | 1.8950 |
| 1435245_at   | Gls2          | glutaminase 2 (liver, mitochondrial)                                                            | AI195532  | 6.7217  | 4.8270 | 1.8947 |
| 1417214_at   | Rab27b        | RAB27b, member RAS oncogene family                                                              | BB121269  | 5.3374  | 3.4443 | 1.8931 |
| 1422906_at   | Abcg2         | ATP-binding cassette, sub-family G (WHITE), member 2                                            | NM_011920 | 11.0993 | 9.2067 | 1.8926 |
| 1435679_at   | Optn          | optineurin                                                                                      | BB770843  | 8.2121  | 6.3197 | 1.8924 |
| 1449204_at   | Gjb5          | gap junction protein, beta 5                                                                    | NM_010291 | 5.6402  | 3.7511 | 1.8892 |
| 1460440_at   | Lphn3         | latrophilin 3                                                                                   | BE945410  | 6.9835  | 5.0970 | 1.8865 |
| 1434858_x_at | Zfp511        | zinc finger protein 511                                                                         | BQ178976  | 6.2582  | 4.3725 | 1.8857 |
| 1425268_a_at | Pear1         | platelet endothelial aggregation receptor 1                                                     | BB752266  | 6.6446  | 4.7617 | 1.8829 |
| 1437250_at   | Mreg          | melanoregulin                                                                                   | AV298358  | 5.3777  | 3.4978 | 1.8799 |
| 1449124_at   | Rgl1          | ral guanine nucleotide dissociation stimulator, -like 1                                         | NM_016846 | 8.8360  | 6.9566 | 1.8794 |
| 1421493_a_at | Rgs20         | regulator of G-protein signaling 20                                                             | NM_021374 | 5.7806  | 3.9024 | 1.8782 |
| 1455812_x_at | Vasn          | vasorin                                                                                         | BB530515  | 10.3438 | 8.4672 | 1.8766 |
| 1453308_at   | 8430429K09Rik | RIKEN cDNA 8430429K09 gene                                                                      | AK018450  | 5.9119  | 4.0372 | 1.8747 |
| 1454731_at   | Myo10         | myosin X                                                                                        | BB794772  | 9.5715  | 7.6973 | 1.8743 |
| 1454043_a_at | Kcnab1        | potassium voltage-gated channel, shaker-related subfamily, beta member 1                        | AK015412  | 6.3795  | 4.5098 | 1.8697 |
| 1419161_a_at | Nox4          | NADPH oxidase 4                                                                                 | AB041034  | 5.1539  | 3.2854 | 1.8685 |
| 1420970_at   | Adcy7         | adenylate cyclase 7                                                                             | NM_007406 | 6.4041  | 4.5361 | 1.8679 |
| 1420731_a_at | Csrp2         | cysteine and glycine-rich protein 2                                                             | NM_007792 | 11.7566 | 9.8891 | 1.8676 |
| 1455160_at   | 2610203C20Rik | RIKEN cDNA 2610203C20 gene                                                                      | BM220421  | 10.3218 | 8.4548 | 1.8670 |
| 1436589_x_at | Prkd2         | protein kinase D2                                                                               | BB204677  | 7.1341  | 5.2673 | 1.8667 |
| 1431033_x_at | Agl           | amylase-1,6-glucosidase, 4-alpha-glucanotransferase                                             | AA681807  | 9.1460  | 7.2794 | 1.8666 |
| 1438633_x_at | Lasp1         | LIM and SH3 protein 1                                                                           | BB377636  | 10.9308 | 9.0656 | 1.8652 |
| 1428881_at   | Klc1          | kinesin light chain 1                                                                           | AK014256  | 9.8453  | 7.9804 | 1.8649 |

|              |               |                                                                     |           |         |         |        |
|--------------|---------------|---------------------------------------------------------------------|-----------|---------|---------|--------|
| 1423555_a_at | Ifi44         | interferon-induced protein 44                                       | BB329808  | 9.1723  | 7.3112  | 1.8610 |
| 1448978_at   | Ngef          | neuronal guanine nucleotide exchange factor                         | NM_019867 | 7.0337  | 5.1742  | 1.8595 |
| 1421340_at   | Map3k5        | mitogen-activated protein kinase kinase kinase 5                    | NM_008580 | 5.4397  | 3.5815  | 1.8582 |
| 1460469_at   | Tnfrsf9       | tumor necrosis factor receptor superfamily, member 9                | BM250782  | 7.4692  | 5.6110  | 1.8582 |
| 1436413_at   | Frk           | fyn-related kinase                                                  | BB831042  | 5.4461  | 3.5883  | 1.8578 |
| 1424507_at   | Rin1          | Ras and Rab interactor 1                                            | BC011277  | 9.0043  | 7.1485  | 1.8559 |
| 1426095_a_at | Tnfrsf22      | tumor necrosis factor receptor superfamily, member 22               | AY046551  | 6.6564  | 4.8014  | 1.8550 |
| 1441684_at   | Ttc3          | tetratricopeptide repeat domain 3                                   | BM116591  | 5.8297  | 3.9760  | 1.8537 |
| 1449852_a_at | Ehd4          | EH-domain containing 4                                              | NM_133838 | 9.5417  | 7.6903  | 1.8514 |
| 1457252_x_at | Pld2          | phospholipase D2                                                    | BB118582  | 9.1178  | 7.2675  | 1.8502 |
| 1435066_at   | Pitpnc1       | phosphatidylinositol transfer protein, cytoplasmic 1                | BB305507  | 6.7217  | 4.8719  | 1.8498 |
| 1422168_a_at | Bdnf          | brain derived neurotrophic factor                                   | AY057913  | 8.5270  | 6.6774  | 1.8495 |
| 1436002_at   | Scube3        | signal peptide, CUB domain, EGF-like 3                              | BB484128  | 6.8564  | 5.0082  | 1.8482 |
| 1451532_s_at | Steap1        | six transmembrane epithelial antigen of the prostate 1              | AF297098  | 10.0134 | 8.1660  | 1.8474 |
| 1418733_at   | Twist1        | twist homolog 1 (Drosophila)                                        | NM_011658 | 9.3246  | 7.4774  | 1.8472 |
| 1437279_x_at | Sdc1          | syndecan 1                                                          | BB533095  | 10.3972 | 8.5503  | 1.8469 |
| 1447685_x_at | Ets2          | E26 avian leukemia oncogene 2, 3' domain                            | BB416434  | 7.6668  | 5.8208  | 1.8461 |
| 1419666_x_at | Nupr1         | nuclear protein 1                                                   | NM_019738 | 11.7573 | 9.9117  | 1.8456 |
| 1455342_at   | Prune2        | prune homolog 2 (Drosophila)                                        | BM232966  | 7.8721  | 6.0270  | 1.8451 |
| 1449168_a_at |               |                                                                     | BC003735  | 9.2699  | 7.4252  | 1.8447 |
| 1452841_at   | Pgm2l1        | phosphoglucomutase 2-like 1                                         | BG073164  | 8.0510  | 6.2077  | 1.8433 |
| 1418250_at   | Arl4d         | ADP-ribosylation factor-like 4D                                     | NM_025404 | 7.7042  | 5.8632  | 1.8410 |
| 1448326_a_at | Crabp1        | cellular retinoic acid binding protein I                            | NM_013496 | 12.6049 | 10.7661 | 1.8387 |
| 1427717_at   | Cd80          | CD80 antigen                                                        | X60958    | 5.2145  | 3.3762  | 1.8383 |
| 1436994_a_at | Hist1h1c      | histone cluster 1, H1c                                              | BB533903  | 7.7563  | 5.9189  | 1.8374 |
| 1455492_at   | B330016D10Rik | RIKEN cDNA B330016D10 gene                                          | BB313577  | 5.6110  | 3.7737  | 1.8374 |
| 1417005_at   | Klc1          | kinesin light chain 1                                               | AU079968  | 8.4238  | 6.5881  | 1.8357 |
| 1421142_s_at | Foxp1         | forkhead box P1                                                     | BG962849  | 9.2035  | 7.3681  | 1.8353 |
| 1439015_at   | Gfra1         | glial cell line derived neurotrophic factor family receptor alpha 1 | AV221299  | 8.9363  | 7.1037  | 1.8325 |
| 1422716_a_at | Acp1          | acid phosphatase 1, soluble                                         | AW554436  | 9.0631  | 7.2346  | 1.8284 |
| 1460188_at   | Ptpn6         | protein tyrosine phosphatase, non-receptor type 6                   | NM_013545 | 8.3846  | 6.5578  | 1.8268 |
| 1418741_at   | Itgb7         | integrin beta 7                                                     | NM_013566 | 7.8087  | 5.9820  | 1.8267 |
| 1455768_at   | Npc2          | Niemann Pick type C2                                                | BG071996  | 7.6454  | 5.8189  | 1.8265 |
| 1434348_at   | Fez2          | fasciculation and elongation protein zeta 2 (zygin II)              | BM206792  | 9.5165  | 7.6903  | 1.8262 |
| 1429778_at   | Optn          | optineurin                                                          | AK015354  | 7.7109  | 5.8877  | 1.8232 |
| 1429114_at   | Sestd1        | SEC14 and spectrin domains 1                                        | AV276619  | 9.1160  | 7.2935  | 1.8225 |
| 1449328_at   | Ly75          | lymphocyte antigen 75                                               | NM_013825 | 8.9243  | 7.1020  | 1.8223 |
| 1453008_at   | Trnp1         | TMF1-regulated nuclear protein 1                                    | AK009004  | 8.5436  | 6.7217  | 1.8219 |
| 1441030_at   | Rai14         | retinoic acid induced 14                                            | BB308974  | 6.5424  | 4.7207  | 1.8217 |
| 1416482_at   | Ttc3          | tetratricopeptide repeat domain 3                                   | BB833716  | 7.7805  | 5.9590  | 1.8215 |
| 1423627_at   | Nqo1          | NAD(P)H dehydrogenase, quinone 1                                    | AV158882  | 8.6957  | 6.8746  | 1.8211 |
| 1447754_x_at | Thap4         | THAP domain containing 4                                            | BB130418  | 10.0620 | 8.2410  | 1.8210 |
| 1418318_at   | Rnf128        | ring finger protein 128                                             | AK004847  | 9.2316  | 7.4112  | 1.8205 |
| 1416488_at   | Ccng2         | cyclin G2                                                           | U95826    | 11.1193 | 9.3001  | 1.8191 |
| 1433909_at   | Syt17         | synaptotagmin XVII                                                  | AW048713  | 7.7541  | 5.9357  | 1.8184 |
| 1440878_at   | Runx1         | runt related transcription factor 1                                 | BB795285  | 6.3742  | 4.5566  | 1.8177 |
| 1422470_at   | Bnip3         | BCL2/adenovirus E1B interacting protein 3                           | NM_009760 | 11.6516 | 9.8343  | 1.8173 |
| 1458722_at   |               |                                                                     | AW550819  | 7.0976  | 5.2833  | 1.8143 |
| 1428921_at   | 2810021B07Rik | RIKEN cDNA 2810021B07 gene                                          | AK021189  | 5.9820  | 4.1689  | 1.8132 |
| 1416753_at   | Prkar1b       | protein kinase, cAMP dependent regulatory, type I beta              | NM_008923 | 8.1611  | 6.3480  | 1.8131 |
| 1451950_a_at | Cd80          | CD80 antigen                                                        | D16220    | 6.2831  | 4.4740  | 1.8090 |
| 1431667_s_at | Efcab11       | EF-hand calcium binding domain 11                                   | AK011836  | 6.9608  | 5.1519  | 1.8089 |
| 1428671_at   | 2200002D01Rik | RIKEN cDNA 2200002D01 gene                                          | AK008617  | 8.5704  | 6.7621  | 1.8083 |
| 1439207_at   | Pnma5         | paraneoplastic antigen family 5                                     | BB698563  | 5.7099  | 3.9019  | 1.8080 |
| 1437270_a_at | Clcf1         | cardiotrophin-like cytokine factor 1                                | BB825816  | 8.3497  | 6.5424  | 1.8073 |
| 1436942_at   | A930035D04Rik | RIKEN cDNA A930035D04 gene                                          | AW123929  | 7.5840  | 5.7781  | 1.8059 |
| 1450138_a_at | Serpnb6a      | serine (or cysteine) peptidase inhibitor, clade B, member 6a        | NM_009254 | 12.0286 | 10.2239 | 1.8047 |
| 1445181_at   | Eml5          | echinoderm microtubule associated protein like 5                    | BM225233  | 7.4433  | 5.6402  | 1.8030 |

|              |               |                                                                             |           |         |         |        |
|--------------|---------------|-----------------------------------------------------------------------------|-----------|---------|---------|--------|
| 1452233_at   | Abcc1         | ATP-binding cassette, sub-family C (CFTR/MRP), member 1                     | BG071908  | 11.2696 | 9.4687  | 1.8009 |
| 1452890_at   | Tll5          | tubulin tyrosine ligase-like family, member 5                               | AK009255  | 8.9586  | 7.1586  | 1.7999 |
| 1439313_at   | Lphn3         | latrophilin 3                                                               | AV338336  | 5.8131  | 4.0139  | 1.7992 |
| 1455204_at   | Pitpnc1       | phosphatidylinositol transfer protein, cytoplasmic 1                        | BB305507  | 7.3768  | 5.5812  | 1.7956 |
| 1456446_at   | 4930523C07Rik | RIKEN cDNA 4930523C07 gene                                                  | BM246687  | 6.2582  | 4.4631  | 1.7951 |
| 1433741_at   | Cd38          | CD38 antigen                                                                | BB256012  | 8.7508  | 6.9566  | 1.7942 |
| 1442775_at   |               |                                                                             | AI481700  | 6.3902  | 4.5961  | 1.7941 |
| 1422184_a_at | Ak1           | adenylate kinase 1                                                          | NM_021515 | 9.1795  | 7.3855  | 1.7940 |
| 1438834_at   | Mospd2        | motile sperm domain containing 2                                            | BB454345  | 6.8044  | 5.0107  | 1.7937 |
| 1440353_at   | Ntf5          | neurotrophin 5                                                              | AI462899  | 5.2368  | 3.4443  | 1.7926 |
| 1417488_at   | Fosl1         | fos-like antigen 1                                                          | U34245    | 7.0690  | 5.2772  | 1.7918 |
| 1452635_x_at | Taf1d         | TATA box binding protein (Tbp)-associated factor, RNA polymerase I, D       | AU044383  | 9.2491  | 7.4611  | 1.7880 |
| 1421153_at   | Loxl4         | lysyl oxidase-like 4                                                        | NM_053083 | 6.7532  | 4.9657  | 1.7875 |
| 1416101_a_at | Hist1h1c      | histone cluster 1, H1c                                                      | NM_015786 | 8.5042  | 6.7196  | 1.7847 |
| 1423933_a_at | 1600029D21Rik | RIKEN cDNA 1600029D21 gene                                                  | BC022950  | 5.4305  | 3.6503  | 1.7801 |
| 1450977_s_at | Ndrp1         | N-myc downstream regulated gene 1                                           | AI987929  | 7.8790  | 6.0989  | 1.7801 |
| 1454904_at   | Mtm1          | X-linked myotubular myopathy gene 1                                         | BG976607  | 9.7891  | 8.0105  | 1.7786 |
| 1424906_at   | Pqjc3         | PQ loop repeat containing                                                   | BC025220  | 8.2843  | 6.5058  | 1.7785 |
| 1445537_at   | 2310039F13Rik | RIKEN cDNA 2310039F13 gene                                                  | BM224499  | 5.6873  | 3.9089  | 1.7784 |
| 1434700_at   | G2e3          | G2/M-phase specific E3 ubiquitin ligase                                     | BM123748  | 9.8404  | 8.0626  | 1.7779 |
| 1432604_at   | Rbl1          | retinoblastoma-like 1 (p107)                                                | AA990586  | 6.5503  | 4.7725  | 1.7778 |
| 1429624_at   | Sltm          | SAFB-like, transcription modulator                                          | BG068009  | 10.8613 | 9.0867  | 1.7745 |
| 1429676_at   |               |                                                                             | AK008862  | 7.3855  | 5.6110  | 1.7745 |
| 1433477_at   | Abr           | active BCR-related gene                                                     | AV325116  | 8.1814  | 6.4073  | 1.7741 |
| 1434699_at   | G2e3          | G2/M-phase specific E3 ubiquitin ligase                                     | BM123748  | 9.5610  | 7.7871  | 1.7739 |
| 1421784_a_at | Efna4         | ephrin A4                                                                   | NM_007910 | 7.2935  | 5.5196  | 1.7738 |
| 1415943_at   | Sdc1          | syndecan 1                                                                  | BI788645  | 10.1024 | 8.3289  | 1.7735 |
| 1417982_at   | Insig2        | insulin induced gene 2                                                      | AV257512  | 9.6110  | 7.8384  | 1.7725 |
| 1452609_at   | 1190005I06Rik | RIKEN cDNA 1190005I06 gene                                                  | BI133691  | 7.3534  | 5.5812  | 1.7722 |
| 1452348_s_at |               |                                                                             | AI481797  | 9.9603  | 8.1882  | 1.7721 |
| 1427739_a_at | Trp53         | transformation related protein 53                                           | AJ297973  | 8.6240  | 6.8523  | 1.7717 |
| 1420774_a_at | Mgarp         | mitochondria localized glutamic acid rich protein                           | NM_026358 | 7.0394  | 5.2685  | 1.7709 |
| 1456377_x_at | Limd2         | LIM domain containing 2                                                     | AV010467  | 10.8219 | 9.0513  | 1.7706 |
| 1436507_at   | Irak2         | interleukin-1 receptor-associated kinase 2                                  | AV241470  | 7.8191  | 6.0489  | 1.7702 |
| 1429642_at   | Zfand4        | zinc finger, AN1-type domain 4                                              | AK012639  | 8.3803  | 6.6129  | 1.7674 |
| 1434359_at   | Fam65b        | family with sequence similarity 65, member B                                | AV329070  | 5.4196  | 3.6538  | 1.7659 |
| 1439530_a_at | Ppp1r13l      | protein phosphatase 1, regulatory (inhibitor) subunit 13 like               | BB826954  | 8.9127  | 7.1485  | 1.7642 |
| 1434684_at   | Rin3          | Ras and Rab interactor 3                                                    | AV338855  | 7.6999  | 5.9357  | 1.7642 |
| 1440132_s_at | Prkar1b       | protein kinase, cAMP dependent regulatory, type I beta                      | BB283894  | 8.5438  | 6.7801  | 1.7638 |
| 1423877_at   | Chaf1b        | chromatin assembly factor 1, subunit B (p60)                                | BC013532  | 8.7297  | 6.9682  | 1.7615 |
| 1459185_at   | Npat          | nuclear protein in the AT region                                            | BG072840  | 6.6801  | 4.9195  | 1.7606 |
| 1424529_s_at | Cgref1        | cell growth regulator with EF hand domain 1                                 | BC023116  | 7.5649  | 5.8058  | 1.7592 |
| 1435264_at   | Emilin2       | elastin microfibril interfacier 2                                           | BB811788  | 6.9504  | 5.1918  | 1.7587 |
| 1424671_at   | Plekhf1       | pleckstrin homology domain containing, family F (with FYVE domain) member 1 | BC002120  | 9.7920  | 8.0346  | 1.7575 |
| 1417507_at   | Cyb561        | cytochrome b-561                                                            | BC006732  | 7.4584  | 5.7052  | 1.7532 |
| 1416206_at   | Sipa1         | signal-induced proliferation associated gene 1                              | D11374    | 8.0359  | 6.2831  | 1.7528 |
| 1422243_at   | Fgf7          | fibroblast growth factor 7                                                  | NM_008008 | 7.5278  | 5.7781  | 1.7497 |
| 1418655_at   | B4galnt1      | beta-1,4-N-acetyl-galactosaminyl transferase 1                              | U18975    | 5.1938  | 3.4443  | 1.7495 |
| 1442700_at   | Pde4b         | phosphodiesterase 4B, cAMP specific                                         | BG793493  | 5.4443  | 3.6970  | 1.7474 |
| 1456320_at   | Fam126b       | family with sequence similarity 126, member B                               | BB701297  | 8.3333  | 6.5862  | 1.7471 |
| 1449941_at   | Myo1e         | myosin IE                                                                   | NM_025612 | 7.5496  | 5.8041  | 1.7455 |
| 1443354_at   |               |                                                                             | BB204151  | 5.5798  | 3.8342  | 1.7455 |
| 1437626_at   | Zfp36l2       | zinc finger protein 36, C3H type-like 2                                     | BB031791  | 11.7242 | 9.9791  | 1.7451 |
| 1430031_at   | lpmk          | inositol polyphosphate multikinase                                          | AK010523  | 6.4952  | 4.7503  | 1.7449 |
| 1438123_at   | Gm10033       | predicted gene 10033                                                        | BB762627  | 6.1540  | 4.4106  | 1.7433 |
| 1418114_at   | Rbpj          | recombination signal binding protein for immunoglobulin kappa J region      | NM_009035 | 9.2851  | 7.5434  | 1.7418 |
| 1438255_at   | Foxn3         | forkhead box N3                                                             | BM196962  | 7.5434  | 5.8041  | 1.7392 |
| 1436993_x_at | Pfn2          | profilin 2                                                                  | BB560492  | 12.2920 | 10.5529 | 1.7391 |
| 1452640_at   | 3110007F17Rik | RIKEN cDNA 3110007F17 gene                                                  | AK014019  | 6.7928  | 5.0544  | 1.7384 |
| 1422134_at   | Fosb          | FBJ osteosarcoma oncogene B                                                 | NM_008036 | 6.4952  | 4.7574  | 1.7378 |
| 1438824_at   | Slc20a1       | solute carrier family 20, member 1                                          | BB465699  | 7.1820  | 5.4443  | 1.7376 |

|              |               |                                                                               |           |         |         |        |
|--------------|---------------|-------------------------------------------------------------------------------|-----------|---------|---------|--------|
| 1436697_at   |               |                                                                               | AV303202  | 6.1770  | 4.4400  | 1.7370 |
| 1427009_at   | Lama5         | laminin, alpha 5                                                              | AV224009  | 8.5932  | 6.8564  | 1.7368 |
| 1419505_a_at | Gggs1         | geranylgeranyl diphosphate synthase 1                                         | NM_010282 | 8.1315  | 6.3964  | 1.7351 |
| 1429418_at   | Cdc14b        | CDC14 cell division cycle 14B                                                 | AK013228  | 8.9901  | 7.2562  | 1.7339 |
| 1443932_at   | Klhdc1        | kelch domain containing 1                                                     | BQ176961  | 7.1176  | 5.3864  | 1.7313 |
| 1438285_at   | 2210015D19Rik | RIKEN cDNA 2210015D19 gene                                                    | BM245369  | 6.9605  | 5.2306  | 1.7299 |
| 1417730_at   | Ext1          | exostoses (multiple) 1                                                        | NM_010162 | 10.8857 | 9.1562  | 1.7295 |
| 1436244_a_at | Tle2          | transducin-like enhancer of split 2, homolog of Drosophila E(spl)             | AU067681  | 7.3956  | 5.6666  | 1.7290 |
| 1418648_at   | Egln3         | EGL nine homolog 3 (C. elegans)                                               | BB284358  | 8.1591  | 6.4320  | 1.7271 |
| 1455604_at   | Fzd5          | frizzled homolog 5 (Drosophila)                                               | BB795235  | 7.8721  | 6.1455  | 1.7266 |
| 1422638_s_at | Rassf5        | Ras association (RalGDS/AF-6) domain family member 5                          | NM_018750 | 6.2831  | 4.5566  | 1.7265 |
| 1451006_at   | Xdh           | xanthine dehydrogenase                                                        | AV286265  | 6.2831  | 4.5566  | 1.7265 |
| 1425573_a_at | Asap1         | ArfGAP with SH3 domain, ankyrin repeat and PH domain1                         | BE943736  | 8.0455  | 6.3199  | 1.7256 |
| 1431561_a_at | Dhx34         | DEAH (Asp-Glu-Ala-His) box polypeptide 34                                     | AK007461  | 8.8070  | 7.0826  | 1.7244 |
| 1457164_at   | Trpa1         | transient receptor potential cation channel, subfamily A, member 1            | BB309395  | 7.2750  | 5.5508  | 1.7242 |
| 1417933_at   | Igfbp6        | insulin-like growth factor binding protein 6                                  | NM_008344 | 9.2824  | 7.5587  | 1.7237 |
| 1429215_at   | 2310058N22Rik | RIKEN cDNA 2310058N22 gene                                                    | BQ175646  | 6.3902  | 4.6674  | 1.7227 |
| 1460341_at   | Plekhb2       | pleckstrin homology domain containing, family B (evectins) member 2           | AF189817  | 9.9052  | 8.1826  | 1.7226 |
| 1434680_at   | Plekhg3       | pleckstrin homology domain containing, family G (with RhoGef domain) member 3 | BM208085  | 7.6809  | 5.9590  | 1.7219 |
| 1422889_at   | Pcdh18        | protocadherin 18                                                              | BM218630  | 9.0896  | 7.3681  | 1.7215 |
| 1417611_at   | Tmem37        | transmembrane protein 37                                                      | BC024613  | 8.0942  | 6.3729  | 1.7213 |
| 1437117_at   | Acap1         | ArfGAP with coiled-coil, ankyrin repeat and PH domains 1                      | BB757196  | 7.2562  | 5.5360  | 1.7202 |
| 1454094_at   | 4930471E19Rik | RIKEN cDNA 4930471E19 gene                                                    | AK015549  | 6.9605  | 5.2409  | 1.7195 |
| 1424052_at   | Thap4         | THAP domain containing 4                                                      | BC013538  | 9.9256  | 8.2072  | 1.7184 |
| 1458341_x_at | Pde5a         | phosphodiesterase 5A, cGMP-specific                                           | BB397841  | 6.0047  | 4.2867  | 1.7180 |
| 1456309_x_at | Lasp1         | LIM and SH3 protein 1                                                         | BG146595  | 10.5381 | 8.8204  | 1.7176 |
| 1444908_at   | Habp4         | hyaluronic acid binding protein 4                                             | BM228113  | 6.9450  | 5.2306  | 1.7143 |
| 1420342_at   |               |                                                                               | NM_010268 | 8.2802  | 6.5677  | 1.7125 |
| 1448914_a_at | Csf1          | colony stimulating factor 1 (macrophage)                                      | BM233698  | 8.6040  | 6.8924  | 1.7116 |
| 1417400_at   | Rai14         | retinoic acid induced 14                                                      | NM_030690 | 11.9336 | 10.2232 | 1.7105 |
| 1451428_x_at | Egfl7         | EGF-like domain 7                                                             | BC024610  | 7.8295  | 6.1198  | 1.7097 |
| 1425126_at   | Ncam1         | neural cell adhesion molecule 1                                               | BC011310  | 5.2306  | 3.5215  | 1.7091 |
| 1435675_at   | Tbc1d12       | TBC1D12: TBC1 domain family, member 12                                        | BF228251  | 8.7560  | 7.0505  | 1.7056 |
| 1427437_at   |               |                                                                               | BC019134  | 7.2050  | 5.5001  | 1.7049 |
| 1445689_at   |               |                                                                               | AA717264  | 6.5268  | 4.8229  | 1.7039 |
| 1442107_at   | Flnb          | filamin, beta                                                                 | BM218614  | 7.6956  | 5.9946  | 1.7010 |
| 1433725_at   | Acvr1b        | activin A receptor, type 1B                                                   | BQ043509  | 9.8255  | 8.1252  | 1.7003 |
| 1454015_a_at | Cdh13         | cadherin 13                                                                   | AK016527  | 5.5336  | 3.8342  | 1.6994 |
| 1460065_at   | AA763515      | expressed sequence AA763515                                                   | BG071123  | 5.3169  | 3.6181  | 1.6988 |
| 1435880_at   | Ankrd50       | ankyrin repeat domain 50                                                      | BM119343  | 9.3555  | 7.6597  | 1.6958 |
| 1428066_at   | Ccdc120       | coiled-coil domain containing 120                                             | AK009768  | 6.6564  | 4.9613  | 1.6952 |
| 1431202_at   | Herc3         | hect domain and RLD 3                                                         | AK017531  | 6.4157  | 4.7207  | 1.6950 |
| 1434628_a_at | Rhpn2         | rhopilin, Rho GTPase binding protein 2                                        | BF228009  | 7.8447  | 6.1527  | 1.6920 |
| 1448861_at   | Traf5         | TNF receptor-associated factor 5                                              | NM_011633 | 7.6015  | 5.9119  | 1.6896 |
| 1424277_at   | Haus7         | HAUS augmin-like complex, subunit 7                                           | AY029337  | 9.9353  | 8.2458  | 1.6896 |
| 1437929_at   | Dact2         | dapper homolog 2, antagonist of beta-catenin (xenopus)                        | AV306847  | 6.8057  | 5.1163  | 1.6894 |
| 1429520_a_at | Acer3         | alkaline ceramidase 3                                                         | BE573407  | 8.0956  | 6.4073  | 1.6883 |
| 1424753_at   | Nudt14        | nudix (nucleoside diphosphate linked moiety X)-type motif 14                  | BC025444  | 9.4555  | 7.7677  | 1.6878 |
| 1454309_at   | 2810002N01Rik | RIKEN cDNA 2810002N01 gene                                                    | BB646622  | 5.7245  | 4.0372  | 1.6873 |
| 1460243_at   | Sptlc2        | serine palmitoyltransferase, long chain base subunit 2                        | BC003227  | 9.3425  | 7.6556  | 1.6870 |
| 1423286_at   | Cbln1         | cerebellin 1 precursor protein                                                | AA016422  | 6.8915  | 5.2050  | 1.6865 |
| 1435251_at   | Snx13         | sorting nexin 13                                                              | AV377013  | 9.0708  | 7.3855  | 1.6853 |
| 1456609_at   | Camk2n1       | calcium/calmodulin-dependent protein kinase II inhibitor 1                    | BE994488  | 10.1318 | 8.4466  | 1.6852 |
| 1434774_at   | Rhbdp2        | rhomoid 5 homolog 2 (Drosophila)                                              | BB005249  | 7.7822  | 6.0989  | 1.6833 |
| 1419766_at   | Sik1          | salt inducible kinase 1                                                       | NM_010831 | 6.2418  | 4.5589  | 1.6829 |
| 1444606_at   | Efna2         | ephrin A2                                                                     | BB790825  | 7.2935  | 5.6110  | 1.6824 |
| 1428321_at   | Eml1          | echinoderm microtubule associated protein like 1                              | AK003593  | 7.7607  | 6.0795  | 1.6812 |

|              |               |                                                                      |           |         |         |        |
|--------------|---------------|----------------------------------------------------------------------|-----------|---------|---------|--------|
| 1456401_at   | Cacnb2        | calcium channel, voltage-dependent, beta 2 subunit                   | BB078175  | 5.5153  | 3.8342  | 1.6811 |
| 1452940_x_at | Pitpnc1       | phosphatidylinositol transfer protein, cytoplasmic 1                 | AI595920  | 6.7353  | 5.0544  | 1.6808 |
| 1417293_at   | Hs6st1        | heparan sulfate 6-O-sulfotransferase 1                               | NM_015818 | 8.4860  | 6.8057  | 1.6803 |
| 1452471_at   | Il17rd        | interleukin 17 receptor D                                            | AF459444  | 5.3760  | 3.6970  | 1.6790 |
| 1435110_at   | Unc5b         | unc-5 homolog B (C. elegans)                                         | BG065285  | 8.2662  | 6.5881  | 1.6781 |
| 1454769_at   | Tatdn2        | TatD DNase domain containing 2                                       | BB314680  | 8.3319  | 6.6564  | 1.6754 |
| 1417040_a_at | Bok           | BCL2-related ovarian killer protein                                  | NM_016778 | 9.7706  | 8.0956  | 1.6750 |
| 1418148_at   | Abhd1         | abhydrolase domain containing 1                                      | NM_021304 | 7.1176  | 5.4443  | 1.6733 |
| 1449197_at   | Wdr20a        | WD repeat domain 20A                                                 | NM_027149 | 8.1609  | 6.4898  | 1.6711 |
| 1456603_at   | Fam101b       | family with sequence similarity 101, member B                        | BG070087  | 7.6525  | 5.9820  | 1.6705 |
| 1457828_at   | Stam          | signal transducing adaptor molecule (SH3 domain and ITAM motif) 1    | BE690800  | 6.8973  | 5.2306  | 1.6667 |
| 1458296_at   |               |                                                                      | BI465650  | 6.5385  | 4.8719  | 1.6667 |
| 1449773_s_at | Gadd45b       | growth arrest and DNA-damage-inducible 45 beta                       | AI323528  | 9.6816  | 8.0161  | 1.6655 |
| 1427539_a_at | Zwint         | ZW10 interactor                                                      | BC013559  | 10.5267 | 8.8628  | 1.6639 |
| 1459593_x_at | Ppp1r13l      | protein phosphatase 1, regulatory (inhibitor) subunit 13 like        | BB752796  | 8.8012  | 7.1383  | 1.6629 |
| 1444272_at   | Intu          | inturned planar cell polarity effector homolog (Drosophila)          | BB207089  | 6.8973  | 5.2355  | 1.6618 |
| 1449544_a_at | Kcnh2         | potassium voltage-gated channel, subfamily H (eag-related), member 2 | NM_013569 | 7.0607  | 5.3994  | 1.6613 |
| 1436613_at   | Coro6         | coronin 6                                                            | AI507196  | 5.6689  | 4.0088  | 1.6601 |
| 1437070_at   | Cdc14b        | CDC14 cell division cycle 14B                                        | BB224362  | 9.5504  | 7.8907  | 1.6597 |
| 1436898_at   |               |                                                                      | BI738328  | 9.9877  | 8.3289  | 1.6589 |
| 1448364_at   | Ccng2         | cyclin G2                                                            | U95826    | 8.6270  | 6.9692  | 1.6578 |
| 1457552_at   | Zfp295        | zinc finger protein 295                                              | BB482373  | 7.8162  | 6.1595  | 1.6567 |
| 1439264_x_at | Lasp1         | LIM and SH3 protein 1                                                | BB433798  | 10.8949 | 9.2413  | 1.6536 |
| 1460510_a_at | Coq10b        | coenzyme Q10 homolog B (S. cerevisiae)                               | AK006551  | 9.9908  | 8.3378  | 1.6530 |
| 1434360_s_at | Ptpg          | protein tyrosine phosphatase, receptor type, G                       | AI596632  | 5.3765  | 3.7243  | 1.6522 |
| 1424784_at   |               |                                                                      | AV047635  | 5.4108  | 3.7591  | 1.6517 |
| 1440293_at   | C230081A13Rik | RIKEN cDNA C230081A13 gene                                           | BB821275  | 6.4242  | 4.7725  | 1.6517 |
| 1453361_at   | Hells         | helicase, lymphoid specific                                          | BM213590  | 6.3554  | 4.7055  | 1.6499 |
| 1453590_at   | Arl5b         | ADP-ribosylation factor-like 5B                                      | BQ032239  | 6.0892  | 4.4400  | 1.6492 |
| 1436031_at   | Cachd1        | cache domain containing 1                                            | BB730977  | 6.0047  | 4.3588  | 1.6459 |
| 1439063_at   | Asxl2         | additional sex combs like 2 (Drosophila)                             | BM231855  | 8.3304  | 6.6846  | 1.6457 |
| 1417843_s_at | Eps8l2        | EPS8-like 2                                                          | NM_133191 | 7.4493  | 5.8041  | 1.6452 |
| 1451477_at   |               |                                                                      | AV047635  | 5.8041  | 4.1608  | 1.6433 |
| 1429071_at   | Me3           | malic enzyme 3, NADP(+)-dependent, mitochondrial                     | AK006146  | 6.2392  | 4.5962  | 1.6430 |
| 1417237_at   | Pld2          | phospholipase D2                                                     | NM_008876 | 8.2299  | 6.5881  | 1.6419 |
| 1451277_at   | Zadh2         | zinc binding alcohol dehydrogenase, domain containing 2              | BC025897  | 10.0939 | 8.4533  | 1.6406 |
| 1428859_at   | Paox          | polyamine oxidase (exo-N4-amino)                                     | AK010469  | 8.2552  | 6.6157  | 1.6395 |
| 1421225_a_at | Slc4a4        | solute carrier family 4 (anion exchanger), member 4                  | NM_018760 | 6.0270  | 4.3876  | 1.6394 |
| 1419074_at   | Chac2         | ChaC, cation transport regulator 2                                   | NM_026527 | 8.7973  | 7.1586  | 1.6386 |
| 1416337_at   | Uqcrb         | ubiquinol-cytochrome c reductase binding protein                     | NM_026219 | 10.7915 | 9.1538  | 1.6377 |
| 1460257_a_at |               |                                                                      | NM_026829 | 8.5618  | 6.9245  | 1.6373 |
| 1427914_a_at | Tceb1         | transcription elongation factor B (SIII), polypeptide 1              | AI019214  | 12.2720 | 10.6347 | 1.6373 |
| 1448562_at   | Upp1          | uridine phosphorylase 1                                              | NM_009477 | 8.9490  | 7.3117  | 1.6372 |
| 1428487_s_at | Coq10b        | coenzyme Q10 homolog B (S. cerevisiae)                               | AK002294  | 9.0795  | 7.4447  | 1.6349 |
| 1448905_at   |               |                                                                      | NM_019730 | 7.5938  | 5.9590  | 1.6347 |
| 1422668_at   | Serpib9b      | serine (or cysteine) peptidase inhibitor, clade B, member 9b         | NM_011452 | 6.6564  | 5.0225  | 1.6340 |
| 1418831_at   | Pkp3          | plakophilin 3                                                        | AW475993  | 6.7309  | 5.0970  | 1.6339 |
| 1430144_at   | Avl9          | AVL9 homolog (S. cerevisiae)                                         | BB815600  | 5.6689  | 4.0372  | 1.6317 |
| 1431074_a_at | Pitpnc1       | phosphatidylinositol transfer protein, cytoplasmic 1                 | BI654600  | 7.1485  | 5.5196  | 1.6288 |
| 1450895_a_at | Cox16         | COX16 cytochrome c oxidase assembly homolog (S. cerevisiae)          | BF166756  | 8.8429  | 7.2147  | 1.6281 |
| 1433451_at   | Cdk5r1        | cyclin-dependent kinase 5, regulatory subunit 1 (p35)                | BB177836  | 7.3238  | 5.6970  | 1.6268 |
| 1441375_at   |               |                                                                      | AU043080  | 5.0021  | 3.3762  | 1.6259 |
| 1438829_at   | Rnf165        | ring finger protein 165                                              | BB801060  | 7.8650  | 6.2392  | 1.6258 |
| 1438972_x_at | 2810410L24Rik | RIKEN cDNA 2810410L24 gene                                           | BB493215  | 7.7740  | 6.1491  | 1.6249 |

|              |               |                                                           |           |         |        |        |
|--------------|---------------|-----------------------------------------------------------|-----------|---------|--------|--------|
| 1452540_a_at |               |                                                           | M25487    | 9.6519  | 8.0272 | 1.6247 |
| 1418758_a_at | Cyth3         | cytohesin 3                                               | NM_011182 | 9.9002  | 8.2755 | 1.6246 |
| 1446417_at   |               |                                                           | AW553625  | 7.2935  | 5.6689 | 1.6246 |
| 1457040_at   | Lgi2          | leucine-rich repeat LGI family, member 2                  | BE947711  | 5.2745  | 3.6503 | 1.6242 |
| 1459948_at   |               |                                                           | BB552070  | 5.6402  | 4.0170 | 1.6233 |
| 1417148_at   | Pdgfrb        | platelet derived growth factor receptor, beta polypeptide | NM_008809 | 6.6318  | 5.0107 | 1.6211 |
| 1436101_at   |               |                                                           | BB752033  | 8.3150  | 6.6941 | 1.6210 |
| 1423786_at   | 8430410A17Rik | RIKEN cDNA 8430410A17 gene                                | BC024401  | 9.4502  | 7.8296 | 1.6206 |
| 1419884_at   |               |                                                           | BF658463  | 6.3554  | 4.7350 | 1.6203 |
| 1428408_a_at | Esy2          | extended synaptotagmin-like protein 2                     | BI102044  | 9.9184  | 8.2984 | 1.6200 |
| 1453295_at   | Asxl2         | additional sex combs like 2 (Drosophila)                  | AK016141  | 6.0777  | 4.4597 | 1.6181 |
| 1440925_at   | Gm19773       | predicted gene, 19773                                     | BG073024  | 6.9571  | 5.3414 | 1.6157 |
| 1456274_at   |               |                                                           | BB067544  | 6.1198  | 4.5056 | 1.6142 |
| 1459391_at   | Abca5         | ATP-binding cassette, sub-family A (ABC1), member 5       | BB128256  | 5.9097  | 4.2966 | 1.6130 |
| 1438802_at   | Foxp1         | forkhead box P1                                           | BB021390  | 5.5812  | 3.9701 | 1.6111 |
| 1437508_at   | Sp4           | trans-acting transcription factor 4                       | AI324972  | 5.5132  | 3.9024 | 1.6108 |
| 1433712_at   | AW555464      | expressed sequence AW555464                               | AV032365  | 9.9148  | 8.3047 | 1.6100 |
| 1418872_at   | Abcb1b        | ATP-binding cassette, sub-family B (MDR/TAP), member 1B   | NM_011075 | 8.9864  | 7.3768 | 1.6096 |
| 1447020_at   |               |                                                           | BB248611  | 5.3054  | 3.6970 | 1.6084 |
| 1431805_a_at | Rhpn2         | rhopilin, Rho GTPase binding protein 2                    | AK004849  | 7.2314  | 5.6239 | 1.6075 |
| 1422758_at   | Chst2         | carbohydrate sulfotransferase 2                           | NM_018763 | 6.0047  | 4.3990 | 1.6057 |
| 1435526_at   | Tor1aip2      | torsin A interacting protein 2                            | BM248600  | 9.6998  | 8.0956 | 1.6042 |
| 1430177_at   | Ube2b         | ubiquitin-conjugating enzyme E2B                          | AK011961  | 6.6170  | 5.0129 | 1.6041 |
| 1443790_x_at | 4930414L22Rik | RIKEN cDNA 4930414L22 gene                                | AV208084  | 6.1607  | 4.5566 | 1.6041 |
| 1429335_at   | Snapc1        | small nuclear RNA activating complex, polypeptide 1       | AK012317  | 8.7520  | 7.1485 | 1.6036 |
| 1430427_a_at | Pcdh18        | protocadherin 18                                          | AK014140  | 6.6941  | 5.0905 | 1.6036 |
| 1444777_at   | Rai14         | retinoic acid induced 14                                  | BB534392  | 6.5230  | 4.9200 | 1.6030 |
| 1452696_a_at | 4933439C10Rik | RIKEN cDNA 4933439C10 gene                                | AK017115  | 7.7379  | 6.1362 | 1.6017 |
| 1423694_at   | Kctd10        | potassium channel tetramerisation domain containing 10    | BC006935  | 10.5727 | 8.9722 | 1.6006 |
| 1453365_at   | Rabgap1l      | RAB GTPase activating protein 1-like                      | AK018430  | 6.0989  | 4.4990 | 1.5999 |
| 1433450_at   | Cdk5r1        | cyclin-dependent kinase 5, regulatory subunit 1 (p35)     | BB177836  | 5.6970  | 4.0995 | 1.5974 |
| 1417174_at   | Tmem218       | transmembrane protein 218                                 | NM_025464 | 7.4584  | 5.8632 | 1.5953 |
| 1437635_at   |               |                                                           | AW146002  | 10.1602 | 8.5656 | 1.5946 |
| 1441604_at   | Esd           | esterase D/formylglutathione hydrolase                    | BM248597  | 8.6313  | 7.0368 | 1.5945 |
| 1416818_at   | Parva         | parvin, alpha                                             | NM_020606 | 8.9263  | 7.3328 | 1.5935 |
| 1460048_at   | Zdhhc13       | zinc finger, DHHC domain containing 13                    | BB462453  | 5.2427  | 3.6503 | 1.5924 |
| 1444248_at   | Rcn2          | reticulocalbin 2                                          | AV175094  | 6.2582  | 4.6674 | 1.5907 |
| 1420394_s_at |               |                                                           | U05264    | 5.9491  | 4.3588 | 1.5903 |
| 1450971_at   | Gadd45b       | growth arrest and DNA-damage-inducible 45 beta            | AK010420  | 10.0943 | 8.5047 | 1.5896 |
| 1451353_at   | Tm6sf1        | transmembrane 6 superfamily member 1                      | AV378394  | 5.8042  | 4.2151 | 1.5891 |
| 1423280_at   | Stmn2         | stathmin-like 2                                           | BM115022  | 6.7797  | 5.1918 | 1.5879 |
| 1449152_at   | Cdkn2b        | cyclin-dependent kinase inhibitor 2B (p15, inhibits CDK4) | AF059567  | 10.3633 | 8.7755 | 1.5878 |
| 1429617_at   | Cyld          | cylindromatosis (turban tumor syndrome)                   | BM119209  | 8.5970  | 7.0095 | 1.5875 |
| 1420909_at   | Vegfa         | vascular endothelial growth factor A                      | NM_009505 | 9.5740  | 7.9880 | 1.5861 |
| 1441513_at   | Tank          | TRAF family member-associated Nf-kappa B activator        | BB040938  | 6.3587  | 4.7734 | 1.5853 |
| 1435556_at   | Zfp597        | zinc finger protein 597                                   | AV270881  | 7.5664  | 5.9820 | 1.5843 |
| 1437201_at   | Lrrc4c        | leucine rich repeat containing 4C                         | AV336083  | 5.5091  | 3.9253 | 1.5838 |
| 1416407_at   | Pea15a        | phosphoprotein enriched in astrocytes 15A                 | AI323543  | 9.1664  | 7.5840 | 1.5824 |
| 1432229_a_at | Cdyl2         | chromodomain protein, Y chromosome-like 2                 | AK006509  | 5.7515  | 4.1698 | 1.5818 |
| 1417190_at   | Nampt         | nicotinamide phosphoribosyltransferase                    | AW989410  | 10.6121 | 9.0318 | 1.5803 |
| 1427527_a_at | Pthlh         | parathyroid hormone-like peptide                          | BI685341  | 5.2306  | 3.6503 | 1.5803 |
| 1419572_a_at | Abcd4         | ATP-binding cassette, sub-family D (ALD), member 4        | NM_008992 | 8.7886  | 7.2096 | 1.5790 |
| 1460561_x_at | Sepw1         | selenoprotein W, muscle 1                                 | BB464434  | 11.2690 | 9.6909 | 1.5780 |
| 1431334_a_at | 4933433P14Rik | RIKEN cDNA 4933433P14 gene                                | AK017049  | 7.3506  | 5.7734 | 1.5772 |
| 1417158_at   | Zxdc          | ZXD family zinc finger C                                  | BB238025  | 7.9993  | 6.4242 | 1.5751 |
| 1440343_at   | Rps6ka5       | ribosomal protein S6 kinase, polypeptide 5                | BQ174267  | 6.7960  | 5.2212 | 1.5748 |
| 1427261_at   | Wwc1          | WW, C2 and coiled-coil domain containing 1                | BQ176786  | 10.1635 | 8.5888 | 1.5747 |
| 1449455_at   | Hck           | hemopoietic cell kinase                                   | NM_010407 | 5.5091  | 3.9344 | 1.5747 |
| 1458832_at   |               |                                                           | BB364131  | 5.5091  | 3.9344 | 1.5747 |



|              |               |                                                                                     |           |         |         |        |
|--------------|---------------|-------------------------------------------------------------------------------------|-----------|---------|---------|--------|
| 1449299_at   | Lrp5          | low density lipoprotein receptor-related protein 5                                  | BC011374  | 5.6110  | 4.0372  | 1.5739 |
| 1419301_at   | Fzd4          | frizzled homolog 4 (Drosophila)                                                     | BF783030  | 6.4791  | 4.9076  | 1.5715 |
| 1415801_at   | Gja1          | gap junction protein, alpha 1                                                       | M63801    | 6.1607  | 4.5892  | 1.5715 |
| 1427010_s_at | Lama5         | laminin, alpha 5                                                                    | AV224009  | 8.0434  | 6.4737  | 1.5697 |
| 1435331_at   | Pyhin1        | pyrin and HIN domain family, member 1                                               | BM241008  | 5.0970  | 3.5274  | 1.5696 |
| 1442014_at   |               |                                                                                     | BB531645  | 7.9235  | 6.3554  | 1.5682 |
| 1417506_at   | Gmnn          | geminin                                                                             | NM_020567 | 11.4494 | 9.8825  | 1.5670 |
| 1436897_at   | Mfhas1        | malignant fibrous histiocytoma amplified sequence 1                                 | BE225764  | 8.8304  | 7.2656  | 1.5648 |
| 1442819_at   | Rhbdl2        | rhomboid, veinlet-like 2 (Drosophila)                                               | BM213778  | 6.0047  | 4.4400  | 1.5647 |
| 1455646_at   | 2010004M13Rik | RIKEN cDNA 2010004M13 gene                                                          | BI904583  | 6.2298  | 4.6674  | 1.5624 |
| 1451722_s_at | Smyd5         | SET and MYND domain containing 5                                                    | BF160651  | 8.7410  | 7.1787  | 1.5624 |
| 1418195_at   | Galnt10       | UDP-N-acetyl-alpha-D-galactosamine:polypeptide N-acetylgalactosaminyltransferase 10 | BG965198  | 7.4226  | 5.8632  | 1.5595 |
| 1443314_at   | 2410042D21Rik | RIKEN cDNA 2410042D21 gene                                                          | BB417293  | 7.8961  | 6.3376  | 1.5585 |
| 1424646_at   | Uck1          | uridine-cytidine kinase 1-like 1                                                    | BC016535  | 9.0572  | 7.5015  | 1.5557 |
| 1418359_at   | Wbscr27       | Williams Beuren syndrome chromosome region 27 (human)                               | NM_024479 | 7.1650  | 5.6110  | 1.5540 |
| 1438130_at   | Taf15         | TAF15 RNA polymerase II, TATA box binding protein (TBP)-associated factor           | BB427389  | 9.3999  | 7.8468  | 1.5531 |
| 1436304_at   | Tmem200a      | transmembrane protein 200A                                                          | BB025239  | 8.2314  | 6.6801  | 1.5514 |
| 1430339_at   | Efcab11       | EF-hand calcium binding domain 11                                                   | AK011507  | 6.7665  | 5.2157  | 1.5508 |
| 1426719_at   | Apbb2         | amyloid beta (A4) precursor protein-binding, family B, member 2                     | BG067463  | 9.8500  | 8.2994  | 1.5506 |
| 1426599_a_at | Slc2a1        | solute carrier family 2 (facilitated glucose transporter), member 1                 | BM209618  | 11.1275 | 9.5772  | 1.5503 |
| 1439978_at   | Srcap         | Snf2-related CREBBP activator protein                                               | BG070570  | 5.7686  | 4.2186  | 1.5500 |
| 1442256_at   | Prkcd         | protein kinase C, delta                                                             | BB541041  | 7.7090  | 6.1607  | 1.5483 |
| 1418210_at   | Pfn2          | profilin 2                                                                          | NM_019410 | 12.8348 | 11.2867 | 1.5482 |
| 1451602_at   | Snx6          | sorting nexin 6                                                                     | BC025911  | 10.0913 | 8.5471  | 1.5441 |
| 1455523_at   | Cstf2         | cleavage stimulation factor, 3' pre-mRNA subunit 2                                  | BG074683  | 8.3885  | 6.8446  | 1.5439 |
| 1436322_a_at | 2810001A02Rik | RIKEN cDNA 2810001A02 gene                                                          | BE952576  | 10.0817 | 8.5387  | 1.5430 |
| 1454876_at   | Rab23         | RAB23, member RAS oncogene family                                                   | BB771587  | 7.5915  | 6.0489  | 1.5426 |
| 1459993_at   |               |                                                                                     | AV233983  | 5.5120  | 3.9701  | 1.5419 |
| 1437833_at   | Ltbp3         | latent transforming growth factor beta binding protein 3                            | BB173900  | 6.3729  | 4.8366  | 1.5362 |
| 1415944_at   | Sdc1          | syndecan 1                                                                          | BI788645  | 8.4173  | 6.8811  | 1.5362 |
| 1416901_at   | Npc2          | Niemann Pick type C2                                                                | BC007190  | 12.4760 | 10.9398 | 1.5361 |
| 1424037_at   | Itpka         | inositol 1,4,5-trisphosphate 3-kinase A                                             | BC027291  | 5.4380  | 3.9024  | 1.5356 |
| 1452817_at   | Smyd3         | SET and MYND domain containing 3                                                    | AK010447  | 8.2266  | 6.6941  | 1.5325 |
| 1416531_at   | Gsto1         | glutathione S-transferase omega 1                                                   | NM_010362 | 11.8786 | 10.3471 | 1.5315 |
| 1423700_at   | Rfc3          | replication factor C (activator 1) 3                                                | BC026795  | 9.9492  | 8.4215  | 1.5276 |
| 1440011_at   |               |                                                                                     | AV228877  | 7.1374  | 5.6104  | 1.5270 |
| 1438945_x_at | Gja1          | gap junction protein, alpha 1                                                       | BB142324  | 10.1781 | 8.6518  | 1.5263 |
| 1428523_at   | Lphn3         | latrophilin 3                                                                       | BE945410  | 6.1404  | 4.6166  | 1.5238 |
| 1435222_at   | Foxp1         | forkhead box P1                                                                     | BM220880  | 10.0922 | 8.5694  | 1.5228 |
| 1435955_at   | Siglecg       | sialic acid binding Ig-like lectin G                                                | BE447170  | 6.3373  | 4.8154  | 1.5219 |
| 1419805_s_at | Ggps1         | geranylgeranyl diphosphate synthase 1                                               | C79210    | 8.2485  | 6.7269  | 1.5216 |
| 1441764_at   | Prdm10        | PR domain containing 10                                                             | BF730739  | 5.0544  | 3.5329  | 1.5215 |
| 1437271_at   | Clcf1         | cardiotrophin-like cytokine factor 1                                                | BB825816  | 7.8572  | 6.3376  | 1.5196 |
| 1435807_at   | Cdc42         | cell division cycle 42                                                              | BF467211  | 7.5012  | 5.9820  | 1.5192 |
| 1434909_at   | Rragd         | Ras-related GTP binding D                                                           | BF462770  | 5.6373  | 4.1183  | 1.5190 |
| 1415800_at   | Gja1          | gap junction protein, alpha 1                                                       | M63801    | 10.9505 | 9.4316  | 1.5189 |
| 1422909_at   | Smc6          | structural maintenance of chromosomes 6                                             | AU022584  | 6.3902  | 4.8719  | 1.5183 |
| 1425154_a_at | Csf1          | colony stimulating factor 1 (macrophage)                                            | M21149    | 7.7180  | 6.2005  | 1.5175 |
| 1433503_at   | Ptgr2         | prostaglandin reductase 2                                                           | BB667090  | 7.4292  | 5.9119  | 1.5173 |
| 1449324_at   | Ero1l         | ERO1-like (S. cerevisiae)                                                           | BM234652  | 11.1782 | 9.6621  | 1.5160 |
| 1422890_at   | Pcdh18        | protocadherin 18                                                                    | BM218630  | 9.0663  | 7.5511  | 1.5152 |
| 1443779_s_at | Lcor          | ligand dependent nuclear receptor corepressor                                       | BB239253  | 9.1290  | 7.6138  | 1.5152 |
| 1460610_at   | Agbl5         | ATP/GTP binding protein-like 5                                                      | BG143491  | 6.6170  | 5.1021  | 1.5149 |
| 1452483_a_at | Cd44          | CD44 antigen                                                                        | X66083    | 10.1330 | 8.6192  | 1.5138 |
| 1428547_at   | Nt5e          | 5' nucleotidase, ecto                                                               | AV273591  | 5.8720  | 4.3588  | 1.5133 |
| 1448957_at   | Rbpj          | recombination signal binding protein for immunoglobulin kappa J region              | NM_009035 | 9.8216  | 8.3093  | 1.5123 |
| 1419665_a_at | Nupr1         | nuclear protein 1                                                                   | NM_019738 | 11.8786 | 10.3669 | 1.5117 |
| 1452061_s_at | Strbp         | spermatid perinuclear RNA binding protein                                           | AK006314  | 10.0161 | 8.5047  | 1.5115 |
| 1429633_at   | Lcor          | ligand dependent nuclear receptor corepressor                                       | AK014072  | 8.4299  | 6.9193  | 1.5106 |

|              |               |                                                                                     |           |         |        |        |
|--------------|---------------|-------------------------------------------------------------------------------------|-----------|---------|--------|--------|
| 1451533_at   | BC022687      | cDNA sequence BC022687                                                              | BC022687  | 7.4693  | 5.9590 | 1.5103 |
| 1439388_s_at | Bcar1         | breast cancer anti-estrogen resistance 1                                            | BB251739  | 10.4759 | 8.9664 | 1.5095 |
| 1426411_a_at | Strbp         | spermatid perinuclear RNA binding protein                                           | AK006314  | 8.0056  | 6.4969 | 1.5088 |
| 1457232_at   | Fbxl21        | F-box and leucine-rich repeat protein 21                                            | BE946365  | 5.4108  | 3.9024 | 1.5084 |
| 1452295_at   | Pmepa1        | prostate transmembrane protein, androgen induced 1                                  | AV291712  | 5.3414  | 3.8342 | 1.5072 |
| 1456337_at   | Arap2         | ArfGAP with RhoGAP domain, ankyrin repeat and PH domain 2                           | AV291818  | 5.8877  | 4.3807 | 1.5071 |
| 1450413_at   | Pdgfb         | platelet derived growth factor, B polypeptide                                       | BC023427  | 5.5434  | 4.0372 | 1.5062 |
| 1421965_s_at | Notch3        | notch 3                                                                             | NM_008716 | 6.3284  | 4.8229 | 1.5055 |
| 1426600_at   | Slc2a1        | solute carrier family 2 (facilitated glucose transporter), member 1                 | BM209618  | 9.2492  | 7.7451 | 1.5041 |
| 1416996_at   | Tbc1d8        | TBC1 domain family, member 8                                                        | BC005421  | 5.4443  | 3.9410 | 1.5034 |
| 1416588_at   | Ptpn          | protein tyrosine phosphatase, receptor type, N                                      | NM_008985 | 7.3391  | 5.8382 | 1.5009 |
| 1459592_a_at | Ppp1r13l      | protein phosphatase 1, regulatory (inhibitor) subunit 13 like                       | BB752796  | 7.8022  | 6.3015 | 1.5008 |
| 1451413_at   | Cast          | calpastatin                                                                         | AB026997  | 10.3431 | 8.8430 | 1.5001 |
| 1456387_at   | Nol4          | nucleolar protein 4                                                                 | AV323033  | 5.6689  | 4.1689 | 1.5000 |
| 1426539_at   | Usp11         | ubiquitin specific peptidase 11                                                     | AI117611  | 6.6916  | 5.1918 | 1.4998 |
| 1421140_a_at | Foxp1         | forkhead box P1                                                                     | BG962849  | 9.6250  | 8.1252 | 1.4998 |
| 1438756_at   | Ankrd29       | ankyrin repeat domain 29                                                            | AV370837  | 7.0861  | 5.5881 | 1.4980 |
| 1434046_at   | AA467197      | expressed sequence AA467197                                                         | BG961961  | 10.4987 | 9.0015 | 1.4972 |
| 1421924_at   | Slc2a3        | solute carrier family 2 (facilitated glucose transporter), member 3                 | M75135    | 6.7217  | 5.2249 | 1.4968 |
| 1420091_s_at | Morc3         | microorchidia 3                                                                     | AI452146  | 9.4923  | 7.9982 | 1.4941 |
| 1453683_a_at | Cep55         | centrosomal protein 55                                                              | AV126179  | 6.1607  | 4.6674 | 1.4933 |
| 1452042_a_at | Tmem144       | transmembrane protein 144                                                           | AV306255  | 6.0489  | 4.5566 | 1.4924 |
| 1418999_at   | 2310033P09Rik | RIKEN cDNA 2310033P09 gene                                                          | NM_024210 | 8.6799  | 7.1886 | 1.4913 |
| 1454896_at   | Rbpj          | recombination signal binding protein for immunoglobulin kappa J region              | BM235554  | 11.3525 | 9.8614 | 1.4911 |
| 1440217_at   | Fam169b       | family with sequence similarity 169, member B                                       | AI931774  | 5.2567  | 3.7657 | 1.4910 |
| 1418709_at   | Cox7a1        | cytochrome c oxidase, subunit VIIa 1                                                | AF037370  | 6.3015  | 4.8113 | 1.4902 |
| 1417268_at   | Cd14          | CD14 antigen                                                                        | NM_009841 | 7.0408  | 5.5508 | 1.4901 |
| 1432260_at   | Gpr39         | G protein-coupled receptor 39                                                       | AK016817  | 5.5928  | 4.1035 | 1.4893 |
| 1433843_at   | Hs1bp3        | HCLS1 binding protein 3                                                             | AW541327  | 7.9936  | 6.5050 | 1.4886 |
| 1418194_at   | Galnt10       | UDP-N-acetyl-alpha-D-galactosamine:polypeptide N-acetylgalactosaminyltransferase 10 | BG965198  | 7.3506  | 5.8632 | 1.4874 |
| 1424128_x_at | Aurkb         | aurora kinase B                                                                     | BC003261  | 10.7954 | 9.3085 | 1.4869 |
| 1445198_at   | Kdm6a         | lysine (K)-specific demethylase 6A                                                  | BB306686  | 6.0989  | 4.6127 | 1.4862 |
| 1424005_at   | B230219D22Rik | RIKEN cDNA B230219D22 gene                                                          | BC006718  | 11.2253 | 9.7400 | 1.4853 |
| 1416156_at   | Vcl           | vinculin                                                                            | NM_009502 | 10.9063 | 9.4211 | 1.4852 |
| 1432284_at   | Mipol1        | mirror-image polydactyly gene 1 homolog (human)                                     | AK006974  | 7.1820  | 5.6970 | 1.4850 |
| 1424552_at   | Casp8         | caspase 8                                                                           | BC006737  | 9.9892  | 8.5047 | 1.4846 |
| 1442383_at   |               |                                                                                     | AW125215  | 6.9308  | 5.4483 | 1.4825 |
| 1419938_s_at | Arhgef17      | Rho guanine nucleotide exchange factor (GEF) 17                                     | AW558066  | 5.6512  | 4.1689 | 1.4823 |
| 1438650_x_at | Gja1          | gap junction protein, alpha 1                                                       | AV330726  | 10.2093 | 8.7275 | 1.4818 |
| 1423978_at   | Sbk1          | SH3-binding kinase 1                                                                | BC025837  | 5.1786  | 3.6970 | 1.4816 |
| 1443827_x_at | Fam20c        | family with sequence similarity 20, member C                                        | BB375974  | 5.3684  | 3.8868 | 1.4816 |
| 1418773_at   | Fads3         | fatty acid desaturase 3                                                             | BE652876  | 9.6687  | 8.1876 | 1.4811 |
| 1425273_s_at | Emp2          | epithelial membrane protein 2                                                       | AF083876  | 6.6726  | 5.1918 | 1.4808 |
| 1421477_at   | Cplx2         | complexin 2                                                                         | NM_009946 | 6.8729  | 5.3925 | 1.4804 |
| 1449464_at   | Kcnq1         | potassium voltage-gated channel, subfamily Q, member 1                              | NM_008434 | 6.1477  | 4.6674 | 1.4802 |
| 1417472_at   | Myh9          | myosin, heavy polypeptide 9, non-muscle                                             | NM_022410 | 10.8772 | 9.3978 | 1.4794 |
| 1454018_at   | Tlk2          | tousled-like kinase 2 (Arabidopsis)                                                 | AK014829  | 9.2940  | 7.8151 | 1.4789 |
| 1441161_at   | B230216G23Rik | RIKEN cDNA B230216G23 gene                                                          | BB307791  | 6.2200  | 4.7433 | 1.4767 |
| 1417509_at   | Rnf19a        | ring finger protein 19A                                                             | AF120206  | 7.7607  | 6.2853 | 1.4754 |
| 1449357_at   | 2310030G06Rik | RIKEN cDNA 2310030G06 gene                                                          | NM_025865 | 6.7438  | 5.2685 | 1.4753 |
| 1439989_at   | Tsc1          | tuberous sclerosis 1                                                                | BB668097  | 6.0870  | 4.6127 | 1.4742 |
| 1432538_a_at | Rfc3          | replication factor C (activator 1) 3                                                | AK013095  | 9.9072  | 8.4341 | 1.4731 |
| 1424746_at   | Kif1c         | kinesin family member 1C                                                            | BC016221  | 9.7524  | 8.2802 | 1.4722 |
| 1422661_at   | Lgals8        | lectin, galactose binding, soluble 8                                                | AI987967  | 7.7550  | 6.2831 | 1.4719 |
| 1459750_s_at | Gpr123        | G protein-coupled receptor 123                                                      | AU015577  | 5.3738  | 3.9024 | 1.4714 |
| 1422847_a_at | Prkcd         | protein kinase C, delta                                                             | AF251036  | 9.3849  | 7.9141 | 1.4707 |
| 1447452_at   | Reep3         | receptor accessory protein 3                                                        | AW124565  | 5.3039  | 3.8342 | 1.4697 |
| 1431293_a_at | Cldn25        | claudin 25                                                                          | AK012260  | 10.2568 | 8.7875 | 1.4693 |

|              |               |                                                                                 |           |         |         |        |
|--------------|---------------|---------------------------------------------------------------------------------|-----------|---------|---------|--------|
| 1443536_at   | Slc7a11       | solute carrier family 7 (cationic amino acid transporter, y+ system), member 11 | BB453858  | 6.4992  | 5.0311  | 1.4681 |
| 1417837_at   | Phlda2        | pleckstrin homology-like domain, family A, member 2                             | NM_009434 | 9.3831  | 7.9171  | 1.4660 |
| 1451734_a_at | Dbn1          | drebrin 1                                                                       | AB064321  | 6.6941  | 5.2306  | 1.4634 |
| 1426232_at   | BC024479      | cDNA sequence BC024479                                                          | BC024479  | 8.3303  | 6.8669  | 1.4633 |
| 1433910_at   | Zcchc6        | zinc finger, CCHC domain containing 6                                           | BM208041  | 9.6944  | 8.2314  | 1.4630 |
| 1439631_at   | Zcchc11       | zinc finger, CCHC domain containing 11                                          | BG060248  | 6.1833  | 4.7207  | 1.4626 |
| 1418220_at   | Foxf2         | forkhead box F2                                                                 | NM_010225 | 5.0685  | 3.6065  | 1.4619 |
| 1435458_at   | Pim1          | proviral integration site 1                                                     | AI323550  | 9.2132  | 7.7518  | 1.4614 |
| 1457556_at   | Gm17501       | predicted gene, 17501                                                           | BB215882  | 6.5578  | 5.0970  | 1.4608 |
| 1456478_at   | Pgm2l1        | phosphoglucomutase 2-like 1                                                     | BB183423  | 7.5094  | 6.0489  | 1.4605 |
| 1439515_at   | Setd5         | SET domain containing 5                                                         | BM207556  | 7.7958  | 6.3376  | 1.4581 |
| 1422717_at   | Acp1          | acid phosphatase 1, soluble                                                     | AW554436  | 8.2410  | 6.7837  | 1.4573 |
| 1419648_at   | Myo1c         | myosin IC                                                                       | NM_008659 | 9.6072  | 8.1507  | 1.4564 |
| 1437731_at   | C2cd2         | C2 calcium-dependent domain containing 2                                        | BB834407  | 6.6079  | 5.1519  | 1.4561 |
| 1434827_at   | Thoc6         | THO complex 6 homolog (Drosophila)                                              | AW554543  | 8.9491  | 7.4935  | 1.4556 |
| 1451361_a_at | Pnpla7        | patatin-like phospholipase domain containing 7                                  | BC027342  | 7.6809  | 6.2264  | 1.4545 |
| 1434334_at   | Prkd2         | protein kinase D2                                                               | AW557946  | 7.5015  | 6.0489  | 1.4526 |
| 1437486_at   | Gprc5a        | G protein-coupled receptor, family C, group 5, member A                         | BG064659  | 7.9950  | 6.5424  | 1.4526 |
| 1434741_at   | Rreb1         | ras responsive element binding protein 1                                        | BB306052  | 6.1198  | 4.6674  | 1.4524 |
| 1445862_at   | Marf1         | meiosis arrest female 1                                                         | BB123487  | 7.9260  | 6.4756  | 1.4504 |
| 1426124_a_at | Clk1          | CDC-like kinase 1                                                               | U21209    | 10.9077 | 9.4592  | 1.4485 |
| 1436365_at   | Zbtb7c        | zinc finger and BTB domain containing 7C                                        | BG922355  | 5.2234  | 3.7758  | 1.4476 |
| 1416980_at   | Mettl7b       | methytransferase like 7B                                                        | NM_027853 | 5.9820  | 4.5346  | 1.4475 |
| 1417438_at   | Rdh14         | retinol dehydrogenase 14 (all-trans and 9-cis)                                  | NM_023697 | 9.2634  | 7.8161  | 1.4473 |
| 1427405_s_at | Rab11fip5     | RAB11 family interacting protein 5 (class I)                                    | BF682225  | 7.9736  | 6.5268  | 1.4468 |
| 1439104_at   | C230081A13Rik | RIKEN cDNA C230081A13 gene                                                      | BQ030909  | 8.0043  | 6.5578  | 1.4466 |
| 1437992_x_at | Gja1          | gap junction protein, alpha 1                                                   | BB039269  | 11.3900 | 9.9438  | 1.4462 |
| 1416575_at   | Cdc45         | cell division cycle 45                                                          | NM_009862 | 9.5569  | 8.1114  | 1.4456 |
| 1421117_at   | Dst           | dystonin                                                                        | NM_010081 | 5.8041  | 4.3588  | 1.4454 |
| 1434949_at   | Armc8         | armadillo repeat containing 8                                                   | BE995635  | 8.9058  | 7.4611  | 1.4446 |
| 1429764_at   | Fam101b       | family with sequence similarity 101, member B                                   | BF101721  | 8.1926  | 6.7488  | 1.4439 |
| 1424983_a_at | Cacul1        | CDK2 associated, cullin domain 1                                                | BB137173  | 8.0943  | 6.6508  | 1.4435 |
| 1429501_s_at | Ppm1a         | protein phosphatase 1A, magnesium dependent, alpha isoform                      | C85630    | 7.8151  | 6.3722  | 1.4429 |
| 1434222_at   | Sipa1l1       | signal-induced proliferation-associated 1 like 1                                | BI153574  | 9.3573  | 7.9153  | 1.4420 |
| 1453636_at   | Pcgf5         | polycomb group ring finger 5                                                    | AV312852  | 6.0489  | 4.6074  | 1.4415 |
| 1457788_at   | Rassf1        | Ras association (RalGDS/AF-6) domain family member 1                            | BB385028  | 6.7601  | 5.3187  | 1.4414 |
| 1459879_at   | Marf1         | meiosis arrest female 1                                                         | AW492820  | 7.1383  | 5.6970  | 1.4413 |
| 1428283_at   | Cyp2s1        | cytochrome P450, family 2, subfamily s, polypeptide 1                           | AK004699  | 5.6096  | 4.1689  | 1.4407 |
| 1449056_at   | E330009J07Rik | RIKEN cDNA E330009J07 gene                                                      | NM_133929 | 9.5953  | 8.1551  | 1.4402 |
| 1444295_at   | Neo1          | neogenin                                                                        | BB129888  | 5.4771  | 4.0372  | 1.4399 |
| 1434951_at   | Armc8         | armadillo repeat containing 8                                                   | BE995635  | 8.3946  | 6.9566  | 1.4380 |
| 1456623_at   | Tpm1          | tropomyosin 1, alpha                                                            | BM232388  | 8.2940  | 6.8564  | 1.4376 |
| 1437119_at   | Ern1          | endoplasmic reticulum (ER) to nucleus signalling 1                              | BG075179  | 9.3003  | 7.8634  | 1.4369 |
| 1437601_at   | Otx1          | orthodenticle homolog 1 (Drosophila)                                            | BB438279  | 7.9099  | 6.4737  | 1.4362 |
| 1439884_at   | Nudt16        | nudix (nucleoside diphosphate linked moiety X)-type motif 16                    | AI851783  | 6.3079  | 4.8719  | 1.4360 |
| 1434773_a_at | Slc2a1        | solute carrier family 2 (facilitated glucose transporter), member 1             | BM207588  | 11.1982 | 9.7625  | 1.4357 |
| 1442257_at   |               |                                                                                 | BI134319  | 8.9468  | 7.5121  | 1.4347 |
| 1416480_a_at |               |                                                                                 | NM_019814 | 11.9098 | 10.4763 | 1.4336 |
| 1448513_a_at | Npc2          | Niemann Pick type C2                                                            | BC007190  | 12.6294 | 11.1964 | 1.4331 |
| 1431087_at   | Spc24         | SPC24, NDC80 kinetochore complex component, homolog (S. cerevisiae)             | BF577722  | 9.6238  | 8.1925  | 1.4313 |
| 1431377_at   | Atxn10        | ataxin 10                                                                       | AK013742  | 7.2935  | 5.8632  | 1.4303 |
| 1417856_at   | Relb          | avian reticuloendotheliosis viral (v-rel) oncogene related B                    | NM_009046 | 8.2615  | 6.8315  | 1.4300 |
| 1425333_at   | Rab43         | RAB43, member RAS oncogene family                                               | BC010248  | 7.6672  | 6.2392  | 1.4280 |
| 1419767_at   | Padi3         | peptidyl arginine deiminase, type III                                           | NM_011060 | 6.3922  | 4.9657  | 1.4265 |
| 1436226_at   | Tceb1         | transcription elongation factor B (SIII), polypeptide 1                         | AI891570  | 7.6064  | 6.1801  | 1.4263 |
| 1425022_at   | Usp3          | ubiquitin specific peptidase 3                                                  | BM936366  | 9.4072  | 7.9831  | 1.4240 |
| 1429001_at   | Pir           | pirin                                                                           | AK009757  | 8.9250  | 7.5015  | 1.4234 |

|              |               |                                                                   |           |         |        |        |
|--------------|---------------|-------------------------------------------------------------------|-----------|---------|--------|--------|
| 1423633_at   | Snrnp48       | small nuclear ribonucleoprotein 48 (U11/U12)                      | BB703486  | 9.7169  | 8.2940 | 1.4228 |
| 1437791_s_at | Emi5          | echinoderm microtubule associated protein like 5                  | AV230748  | 7.0139  | 5.5914 | 1.4225 |
| 1435972_at   | Cast          | calpastatin                                                       | BB148748  | 9.8561  | 8.4341 | 1.4220 |
| 1453822_at   | Dnalc1        | dynein, axonemal, light chain 1                                   | BG916281  | 5.4916  | 4.0698 | 1.4218 |
| 1417926_at   | Ncapg2        | non-SMC condensin II complex, subunit G2                          | NM_133762 | 10.8788 | 9.4571 | 1.4217 |
| 1436396_at   | Wdr60         | WD repeat domain 60                                               | AV291191  | 7.7180  | 6.2975 | 1.4205 |
| 1418102_at   | Hes1          | hairy and enhancer of split 1 (Drosophila)                        | BC018375  | 8.9125  | 7.4935 | 1.4190 |
| 1422948_s_at |               |                                                                   | NM_013550 | 8.8597  | 7.4411 | 1.4185 |
| 1424229_at   | Dyrk3         | dual-specificity tyrosine-(Y)-phosphorylation regulated kinase 3  | BC006704  | 7.8250  | 6.4073 | 1.4177 |
| 1437780_at   | Fancb         | Fanconi anemia, complementation group B                           | AV222467  | 8.4879  | 7.0718 | 1.4161 |
| 1460599_at   | Ermp1         | endoplasmic reticulum metalloproteinase 1                         | BB372567  | 7.5356  | 6.1198 | 1.4158 |
| 1448829_at   | Smc6          | structural maintenance of chromosomes 6                           | AV281575  | 9.1666  | 7.7518 | 1.4147 |
| 1420170_at   | Myh9          | myosin, heavy polypeptide 9, non-muscle                           | C80049    | 9.9530  | 8.5385 | 1.4145 |
| 1416042_s_at | Nasp          | nuclear autoantigenic sperm protein (histone-binding)             | BB493242  | 10.6422 | 9.2278 | 1.4144 |
| 1418924_at   | Rassf7        | Ras association (RalGDS/AF-6) domain family (N-terminal) member 7 | NM_025886 | 8.7913  | 7.3768 | 1.4144 |
| 1421922_at   | Sh3bp5        | SH3-domain binding protein 5 (BTK-associated)                     | BQ179335  | 6.9332  | 5.5196 | 1.4136 |
| 1456655_at   | LOC100505027  | uncharacterized LOC100505027                                      | BM231698  | 9.5576  | 8.1457 | 1.4119 |
| 1434196_at   | Dnaja4        | DnaJ (Hsp40) homolog, subfamily A, member 4                       | BQ176119  | 6.6801  | 5.2685 | 1.4116 |
| 1426688_at   | Sdha          | succinate dehydrogenase complex, subunit A, flavoprotein (Fp)     | BF585357  | 11.1726 | 9.7625 | 1.4101 |
| 1439773_at   | Ly6e          | lymphocyte antigen 6 complex, locus E                             | BI408205  | 8.4159  | 7.0061 | 1.4098 |
| 1436223_at   | Itgb8         | integrin beta 8                                                   | BB504737  | 6.1404  | 4.7311 | 1.4093 |
| 1455242_at   | Foxp1         | forkhead box P1                                                   | BM220880  | 9.5231  | 8.1166 | 1.4066 |
| 1448855_at   | Rassf1        | Ras association (RalGDS/AF-6) domain family member 1              | NM_019713 | 9.7552  | 8.3497 | 1.4056 |
| 1438437_a_at | 4933439C10Rik | RIKEN cDNA 4933439C10 gene                                        | AV205521  | 7.9936  | 6.5881 | 1.4056 |
| 1437989_at   | Pde8b         | phosphodiesterase 8B                                              | BB357157  | 7.7251  | 6.3197 | 1.4054 |
| 1429787_x_at | Zwint         | ZW10 interactor                                                   | AK008144  | 10.6936 | 9.2884 | 1.4052 |
| 1427894_at   | Vasn          | vasorin                                                           | AK012169  | 8.5837  | 7.1787 | 1.4051 |
| 1434756_at   | 5430421B17    | uncharacterized protein 5430421B17                                | AV292354  | 6.6941  | 5.2900 | 1.4041 |
| 1436073_at   | A630007B06Rik | RIKEN cDNA A630007B06 gene                                        | BB370775  | 7.9771  | 6.5730 | 1.4041 |
| 1457470_at   |               |                                                                   | BG067509  | 6.7309  | 5.3271 | 1.4038 |
| 1452342_at   | Apbb2         | amyloid beta (A4) precursor protein-binding, family B, member 2   | AW542721  | 9.4253  | 8.0217 | 1.4036 |
| 1426362_at   | Tmem144       | transmembrane protein 144                                         | AV306255  | 6.5111  | 5.1088 | 1.4023 |
| 1430522_a_at | Vamp5         | vesicle-associated membrane protein 5                             | AK009266  | 9.7311  | 8.3291 | 1.4020 |
| 1423452_at   | Stk17b        | serine/threonine kinase 17b (apoptosis-inducing)                  | AV173139  | 9.7795  | 8.3783 | 1.4012 |
| 1452224_at   | Morc3         | microorchidia 3                                                   | BC026506  | 8.9280  | 7.5278 | 1.4002 |
| 1439633_at   | Syt7          | synaptotagmin VII                                                 | BQ175636  | 6.7415  | 5.3414 | 1.4001 |
| 1422894_at   | Sfmbt1        | Scm-like with four mbt domains 1                                  | AV214764  | 5.9566  | 4.5566 | 1.4000 |
| 1444141_at   | Snx13         | sorting nexin 13                                                  | BB828008  | 5.0970  | 3.6970 | 1.4000 |
| 1432007_s_at | Ap2a2         | adaptor protein complex AP-2, alpha 2 subunit                     | AK009735  | 8.1609  | 6.7611 | 1.3999 |
| 1435580_at   | C230081A13Rik | RIKEN cDNA C230081A13 gene                                        | AW553275  | 9.9257  | 8.5270 | 1.3987 |
| 1425542_a_at | Ppp2r5c       | protein phosphatase 2, regulatory subunit B (B56), gamma isoform  | BC003979  | 10.9903 | 9.5922 | 1.3981 |
| 1453864_at   | Rdh14         | retinol dehydrogenase 14 (all-trans and 9-cis)                    | AK014097  | 6.5424  | 5.1455 | 1.3969 |
| 1422169_a_at | Bdnf          | brain derived neurotrophic factor                                 | AY057913  | 8.0386  | 6.6421 | 1.3966 |
| 1456422_at   | Dennd5b       | DENN/MADD domain containing 5B                                    | AV276849  | 5.5737  | 4.1773 | 1.3964 |
| 1429028_at   | Dock11        | dedicator of cytokinesis 11                                       | AK017170  | 10.1709 | 8.7755 | 1.3954 |
| 1437651_a_at | Dtnb          | dystrobrevin, beta                                                | AW537479  | 7.5855  | 6.1911 | 1.3943 |
| 1458358_at   | Pank2         | pantothenate kinase 2                                             | BB402666  | 6.3015  | 4.9085 | 1.3930 |
| 1424090_at   | Sdcbp2        | syndecan binding protein (syntenin) 2                             | BC005556  | 6.5918  | 5.1996 | 1.3922 |
| 1440250_at   | Col4a4        | collagen, type IV, alpha 4                                        | BM121658  | 5.4750  | 4.0829 | 1.3922 |
| 1423355_at   | Snap29        | synaptosomal-associated protein 29                                | BF682880  | 7.0885  | 5.6970 | 1.3915 |
| 1417101_at   | Hspa2         | heat shock protein 2                                              | BC004714  | 7.5511  | 6.1607 | 1.3904 |
| 1421299_a_at | Lef1          | lymphoid enhancer binding factor 1                                | NM_010703 | 5.4275  | 4.0372 | 1.3903 |
| 1435904_at   | Eif2c3        | eukaryotic translation initiation factor 2C, 3                    | BB355034  | 7.2050  | 5.8150 | 1.3900 |
| 1427233_at   | Tshz1         | teashirt zinc finger family member 1                              | AV291373  | 9.7185  | 8.3289 | 1.3897 |
| 1421833_at   | Pip5k1b       | phosphatidylinositol-4-phosphate 5-kinase, type 1 beta            | NM_008846 | 6.6572  | 5.2685 | 1.3887 |
| 1436499_at   | Sgms1         | sphingomyelin synthase 1                                          | AW985925  | 8.5270  | 7.1383 | 1.3887 |
| 1416075_at   | Sav1          | salvador homolog 1 (Drosophila)                                   | NM_022028 | 8.9005  | 7.5121 | 1.3884 |
| 1451456_at   | Hjrp          | Holliday junction recognition protein                             | BC004768  | 9.0404  | 7.6525 | 1.3879 |
| 1421926_at   | Mapk11        | mitogen-activated protein kinase 11                               | AV329330  | 6.9689  | 5.5812 | 1.3877 |

|              |               |                                                                                       |           |         |         |        |
|--------------|---------------|---------------------------------------------------------------------------------------|-----------|---------|---------|--------|
| 1424581_at   | Stac2         | SH3 and cysteine rich domain 2                                                        | BC024864  | 7.7607  | 6.3735  | 1.3872 |
| 1420008_s_at | Wwc1          | WW, C2 and coiled-coil domain containing 1                                            | AU017197  | 10.4273 | 9.0404  | 1.3869 |
| 1436069_at   | Ing5          | inhibitor of growth family, member 5                                                  | AW545952  | 9.5527  | 8.1666  | 1.3862 |
| 1428186_at   | Kctd6         | potassium channel tetramerisation domain containing 6                                 | AK017384  | 9.1212  | 7.7384  | 1.3828 |
| 1416410_at   | Pafah1b3      | platelet-activating factor acetylhydrolase, isoform 1b, subunit 3                     | NM_008776 | 10.6356 | 9.2535  | 1.3821 |
| 1417508_at   | Rnf19a        | ring finger protein 19A                                                               | AF120206  | 10.1888 | 8.8070  | 1.3819 |
| 1449551_at   | Myo1c         | myosin IC                                                                             | NM_008659 | 7.4308  | 6.0489  | 1.3819 |
| 1439148_a_at | Pfkl          | phosphofructokinase, liver, B-type                                                    | BE914497  | 10.2616 | 8.8812  | 1.3803 |
| 1418049_at   | Ltbp3         | latent transforming growth factor beta binding protein 3                              | NM_008520 | 10.1007 | 8.7209  | 1.3799 |
| 1457468_at   |               |                                                                                       | BB042052  | 6.3902  | 5.0107  | 1.3795 |
| 1449553_at   | Nkain1        | Na+/K+ transporting ATPase interacting 1                                              | AK009389  | 9.5100  | 8.1321  | 1.3779 |
| 1427334_s_at | 2810474O19Rik | RIKEN cDNA 2810474O19 gene                                                            | BE196832  | 9.9545  | 8.5767  | 1.3778 |
| 1433782_at   | Cldn12        | claudin 12                                                                            | AW554231  | 9.5094  | 8.1321  | 1.3773 |
| 1426156_at   | Lats2         | large tumor suppressor 2                                                              | AY015062  | 6.1903  | 4.8145  | 1.3758 |
| 1424022_at   | Osgin1        | oxidative stress induced growth inhibitor 1                                           | BC022135  | 7.4361  | 6.0622  | 1.3740 |
| 1454048_a_at | 4931408A02Rik | RIKEN cDNA 4931408A02 gene                                                            | AK016443  | 7.9620  | 6.5881  | 1.3739 |
| 1451246_s_at | Aurkb         | aurora kinase B                                                                       | BC003261  | 10.0691 | 8.6954  | 1.3737 |
| 1457107_at   |               |                                                                                       | BB531660  | 6.6422  | 5.2685  | 1.3737 |
| 1433781_a_at | Cldn12        | claudin 12                                                                            | AW554231  | 10.8354 | 9.4626  | 1.3728 |
| 1458176_at   | Per3          | period homolog 3 (Drosophila)                                                         | BB021263  | 6.7217  | 5.3491  | 1.3726 |
| 1457651_x_at | Rem2          | rad and gem related GTP binding protein 2                                             | BB270375  | 5.6689  | 4.2966  | 1.3723 |
| 1436708_x_at | Mcm4          | minichromosome maintenance deficient 4 homolog (S. cerevisiae)                        | BB447978  | 11.2361 | 9.8645  | 1.3716 |
| 1428074_at   | Tmem158       | transmembrane protein 158                                                             | BE981853  | 7.8983  | 6.5268  | 1.3715 |
| 1417079_s_at | Lgals2        | lectin, galactose-binding, soluble 2                                                  | NM_025622 | 5.3414  | 3.9701  | 1.3713 |
| 1438316_a_at | Ccdc102a      | coiled-coil domain containing 102A                                                    | BB375402  | 7.8757  | 6.5045  | 1.3713 |
| 1448883_at   | Lgmn          | legumain                                                                              | NM_011175 | 8.9402  | 7.5689  | 1.3713 |
| 1418209_a_at | Pfn2          | profilin 2                                                                            | NM_019410 | 12.8635 | 11.4941 | 1.3693 |
| 1441437_at   |               |                                                                                       | BM119933  | 6.0360  | 4.6674  | 1.3685 |
| 1450646_at   | Cyp51         | cytochrome P450, family 51                                                            | NM_020010 | 11.0142 | 9.6460  | 1.3681 |
| 1438061_at   | 4930523C07Rik | RIKEN cDNA 4930523C07 gene                                                            | AV272196  | 5.9590  | 4.5917  | 1.3673 |
| 1449163_at   | Sigirr        | single immunoglobulin and toll-interleukin 1 receptor (TIR) domain                    | NM_023059 | 9.1936  | 7.8263  | 1.3673 |
| 1441444_at   | Nbeal1        | neurobeachin like 1                                                                   | BB022773  | 5.7139  | 4.3477  | 1.3662 |
| 1435266_at   | Scai          | suppressor of cancer cell invasion                                                    | BB495464  | 8.1320  | 6.7659  | 1.3661 |
| 1436925_at   | Foxn3         | forkhead box N3                                                                       | AV228812  | 8.4268  | 7.0611  | 1.3656 |
| 1437790_at   | Eml5          | echinoderm microtubule associated protein like 5                                      | AV230748  | 5.4443  | 4.0796  | 1.3648 |
| 1437623_x_at | Xrcc3         | X-ray repair complementing defective repair in Chinese hamster cells 3                | BB251723  | 6.5881  | 5.2241  | 1.3640 |
| 1449528_at   | Figf          | c-fos induced growth factor                                                           | NM_010216 | 6.6275  | 5.2638  | 1.3637 |
| 1430152_at   | Eps15         | epidermal growth factor receptor pathway substrate 15                                 | BB207193  | 5.3212  | 3.9594  | 1.3617 |
| 1439279_at   | 3110007F17Rik | RIKEN cDNA 3110007F17 gene                                                            | AV339304  | 7.5356  | 6.1748  | 1.3608 |
| 1423623_at   | 2810021B07Rik | RIKEN cDNA 2810021B07 gene                                                            | AW060558  | 7.9971  | 6.6369  | 1.3602 |
| 1433518_at   | Lcmt2         | leucine carboxyl methyltransferase 2                                                  | BM120022  | 5.0103  | 3.6503  | 1.3600 |
| 1441063_at   | Eif2c3        | eukaryotic translation initiation factor 2C, 3                                        | BB229155  | 7.5990  | 6.2392  | 1.3598 |
| 1417228_at   | Capn1         | calpain 1                                                                             | AF084459  | 8.3045  | 6.9450  | 1.3595 |
| 1450720_at   | Acp1          | acid phosphatase 1, soluble                                                           | AW554436  | 11.6582 | 10.2994 | 1.3587 |
| 1449405_at   | Tns1          | tensin 1                                                                              | NM_027884 | 6.9094  | 5.5508  | 1.3586 |
| 1430692_a_at | Sel1l         | sel-1 suppressor of lin-12-like (C. elegans)                                          | AK005023  | 7.2935  | 5.9349  | 1.3585 |
| 1423212_at   | Phc1          | polyhomeotic-like 1 (Drosophila)                                                      | BE650359  | 9.0583  | 7.7001  | 1.3582 |
| 1430025_at   | Ppp3cc        | protein phosphatase 3, catalytic subunit, gamma isoform                               | AK015002  | 7.4072  | 6.0489  | 1.3582 |
| 1426934_at   | Nhs1          | NHS-like 1                                                                            | BC013565  | 8.5807  | 7.2231  | 1.3576 |
| 1456036_x_at | Gsto1         | glutathione S-transferase omega 1                                                     | AV003026  | 11.6812 | 10.3248 | 1.3564 |
| 1448613_at   | Ecm1          | extracellular matrix protein 1                                                        | NM_007899 | 10.0400 | 8.6842  | 1.3558 |
| 1418778_at   | Ccdc109b      | coiled-coil domain containing 109B                                                    | NM_025779 | 9.9690  | 8.6134  | 1.3556 |
| 1438805_at   | Ccnd3         | cyclin D3                                                                             | BE691816  | 6.4097  | 5.0544  | 1.3552 |
| 1455355_at   | G2e3          | G2/M-phase specific E3 ubiquitin ligase                                               | BG073146  | 8.1609  | 6.8057  | 1.3552 |
| 1422715_s_at | Acp1          | acid phosphatase 1, soluble                                                           | AW554436  | 11.9243 | 10.5696 | 1.3547 |
| 1448295_at   | Med10         | mediator of RNA polymerase II transcription, subunit 10 homolog (NUT2, S. cerevisiae) | NM_138596 | 10.6634 | 9.3096  | 1.3538 |
| 1417736_at   | Smc6          | structural maintenance of chromosomes 6                                               | AV281575  | 9.3471  | 7.9958  | 1.3513 |
| 1425686_at   | Cflar         | CASP8 and FADD-like apoptosis regulator                                               | BE284491  | 8.2547  | 6.9036  | 1.3511 |
| 1425248_a_at | Tyro3         | TYRO3 protein tyrosine kinase 3                                                       | AB000828  | 7.0451  | 5.6970  | 1.3481 |

|              |               |                                                                                                |           |         |        |        |
|--------------|---------------|------------------------------------------------------------------------------------------------|-----------|---------|--------|--------|
| 1421383_at   | Ccdc82        | coiled-coil domain containing 82                                                               | NM_025534 | 5.9564  | 4.6085 | 1.3480 |
| 1443158_at   |               |                                                                                                | BB035643  | 5.7781  | 4.4307 | 1.3474 |
| 1421654_a_at | Lmna          | lamin A                                                                                        | NM_019390 | 11.3358 | 9.9885 | 1.3473 |
| 1452409_at   | Gltscr2       | glioma tumor suppressor candidate region gene 2                                                | BB105833  | 6.9285  | 5.5812 | 1.3473 |
| 1420119_s_at | Phf3          | PHD finger protein 3                                                                           | AU020177  | 8.5845  | 7.2372 | 1.3473 |
| 1434314_s_at | Rab11fip5     | RAB11 family interacting protein 5 (class I)                                                   | BQ177085  | 9.7801  | 8.4328 | 1.3473 |
| 1437775_at   | Dlst          | dihydrolipoamide S-succinyltransferase (E2 component of 2-oxo-glutarate complex)               | BB343361  | 7.0967  | 5.7515 | 1.3452 |
| 1423471_at   | Ptbp2         | polypyrimidine tract binding protein 2                                                         | BB076855  | 6.3554  | 5.0107 | 1.3446 |
| 1441787_at   | Zc3h12c       | zinc finger CCCH type containing 12C                                                           | AW764198  | 5.0618  | 3.7172 | 1.3446 |
| 1442465_s_at | Strbp         | spermatid perinuclear RNA binding protein                                                      | AV377824  | 9.2758  | 7.9339 | 1.3419 |
| 1422157_a_at | Itgb1bp1      | integrin beta 1 binding protein 1                                                              | NM_008403 | 9.6454  | 8.3047 | 1.3407 |
| 1416029_at   | Klf10         | Kruppel-like factor 10                                                                         | NM_013692 | 10.0578 | 8.7172 | 1.3406 |
| 1442316_x_at | Trp53bp1      | transformation related protein 53 binding protein 1                                            | BB119893  | 5.3765  | 4.0372 | 1.3394 |
| 1450997_at   | Stk17b        | serine/threonine kinase 17b (apoptosis-inducing)                                               | AV173139  | 8.6826  | 7.3433 | 1.3393 |
| 1428657_at   | Rreb1         | ras responsive element binding protein 1                                                       | BE197381  | 7.8022  | 6.4635 | 1.3388 |
| 1449094_at   | Gjc1          | gap junction protein, gamma 1                                                                  | NM_008122 | 9.9354  | 8.5970 | 1.3385 |
| 1417828_at   | Aqp8          | aquaporin 8                                                                                    | NM_007474 | 5.6970  | 4.3588 | 1.3382 |
| 1438842_at   | Mtch2         | mitochondrial carrier homolog 2 (C. elegans)                                                   | AV067008  | 5.6970  | 4.3588 | 1.3382 |
| 1432161_a_at | Ptar1         | protein prenyltransferase alpha subunit repeat containing 1                                    | AK006988  | 5.4108  | 4.0729 | 1.3380 |
| 1455619_at   | BC062258      | cDNA sequence BC062258                                                                         | AA185687  | 7.7743  | 6.4365 | 1.3378 |
| 1423747_a_at | Pdk1          | pyruvate dehydrogenase kinase, isoenzyme 1                                                     | BC027196  | 10.8046 | 9.4671 | 1.3375 |
| 1459495_at   |               |                                                                                                | BG075346  | 5.8350  | 4.4990 | 1.3360 |
| 1452939_a_at | Pitpnc1       | phosphatidylinositol transfer protein, cytoplasmic 1                                           | AI595920  | 6.4327  | 5.0970 | 1.3358 |
| 1452515_a_at | Xylt2         | xylosyltransferase II                                                                          | AJ291751  | 6.2735  | 4.9382 | 1.3353 |
| 1430210_at   | Pgpep1l       | pyroglutamyl-peptidase I-like                                                                  | AK021221  | 5.1000  | 3.7657 | 1.3343 |
| 1455143_at   | Nlgn2         | neuroligin 2                                                                                   | AU042744  | 9.0630  | 7.7303 | 1.3327 |
| 1426329_s_at | Baalc         | brain and acute leukemia, cytoplasmic                                                          | AF371320  | 7.0840  | 5.7515 | 1.3324 |
| 1418380_at   | Terf1         | telomeric repeat binding factor 1                                                              | NM_009352 | 9.6839  | 8.3519 | 1.3320 |
| 1454790_at   | Wdr35         | WD repeat domain 35                                                                            | BG072960  | 8.4117  | 7.0805 | 1.3312 |
| 1453777_a_at | Ndst3         | N-deacetylase/N-sulfotransferase (heparan glucosaminyl) 3                                      | AK014990  | 5.0013  | 3.6701 | 1.3311 |
| 1443679_at   | 2510003B16Rik | RIKEN cDNA 2510003B16 gene                                                                     | AW123011  | 5.6110  | 4.2807 | 1.3303 |
| 1422910_s_at | Smc6          | structural maintenance of chromosomes 6                                                        | AU022584  | 10.5757 | 9.2460 | 1.3297 |
| 1436186_at   | E2f8          | E2F transcription factor 8                                                                     | BM247465  | 9.7922  | 8.4630 | 1.3292 |
| 1418509_at   | Cbr2          | carbonyl reductase 2                                                                           | BC010758  | 5.1625  | 3.8342 | 1.3282 |
| 1429564_at   | Pcgf5         | polycomb group ring finger 5                                                                   | AK002387  | 10.4808 | 9.1537 | 1.3271 |
| 1449167_at   | Epb4.114a     | erythrocyte protein band 4.1-like 4a                                                           | NM_013512 | 8.8461  | 7.5200 | 1.3262 |
| 1436248_at   | Rasal2        | RAS protein activator like 2                                                                   | AW120749  | 8.1825  | 6.8590 | 1.3235 |
| 1452058_a_at | Rnf11         | ring finger protein 11                                                                         | BI150320  | 9.3485  | 8.0252 | 1.3232 |
| 1454642_a_at | Commd3        | COMM domain containing 3                                                                       | BB230296  | 9.8290  | 8.5064 | 1.3226 |
| 1457915_at   | 4833442J19Rik | RIKEN cDNA 4833442J19 gene                                                                     | AV288616  | 6.5907  | 5.2685 | 1.3222 |
| 1417398_at   | Rras2         | related RAS viral (r-ras) oncogene homolog 2                                                   | NM_025846 | 11.1402 | 9.8182 | 1.3220 |
| 1434089_at   | Synpo         | synaptopodin                                                                                   | BB426294  | 8.5361  | 7.2147 | 1.3214 |
| 1452306_at   | Zfyve26       | zinc finger, FYVE domain containing 26                                                         | BC006654  | 7.6042  | 6.2831 | 1.3211 |
| 1423013_at   | Foxf1         | forkhead box F1                                                                                | NM_010426 | 7.1829  | 5.8632 | 1.3197 |
| 1441737_s_at | Rassf1        | Ras association (RalGDS/AF-6) domain family member 1                                           | BB757103  | 10.4435 | 9.1238 | 1.3197 |
| 1455727_at   | Zrsr2         | zinc finger (CCCH type), RNA binding motif and serine/arginine rich 2                          | AW542140  | 9.9937  | 8.6743 | 1.3194 |
| 1452397_at   | 2810474O19Rik | RIKEN cDNA 2810474O19 gene                                                                     | BE196832  | 6.8852  | 5.5659 | 1.3193 |
| 1453622_s_at | Mllt3         | myeloid/lymphoid or mixed-lineage leukemia (trithorax homolog, Drosophila); translocated to, 3 | AK008707  | 9.1047  | 7.7871 | 1.3176 |
| 1416381_a_at | Prdx5         | peroxiredoxin 5                                                                                | BC008174  | 11.0941 | 9.7768 | 1.3174 |
| 1422403_at   |               |                                                                                                | NM_008334 | 6.5001  | 5.1827 | 1.3173 |
| 1453775_at   | Rictor        | RPTOR independent companion of MTOR, complex 2                                                 | AI508470  | 7.4308  | 6.1141 | 1.3167 |
| 1460466_at   |               |                                                                                                | BB824055  | 9.9390  | 8.6228 | 1.3162 |
| 1460231_at   | Irf5          | interferon regulatory factor 5                                                                 | NM_012057 | 6.6148  | 5.2989 | 1.3159 |
| 1424517_at   | Ccdc12        | coiled-coil domain containing 12                                                               | BC026668  | 8.1114  | 6.7967 | 1.3147 |
| 1430335_a_at | Pax3          | paired box gene 3                                                                              | AK012493  | 7.7219  | 6.4073 | 1.3146 |
| 1416120_at   | Rrm2          | ribonucleotide reductase M2                                                                    | NM_009104 | 10.3124 | 8.9981 | 1.3143 |
| 1434339_at   | Fbnp1l        | formin binding protein 1-like                                                                  | AW548221  | 10.1706 | 8.8566 | 1.3140 |

|              |               |                                                                                                |           |         |         |        |
|--------------|---------------|------------------------------------------------------------------------------------------------|-----------|---------|---------|--------|
| 1421009_at   | Rsad2         | radical S-adenosyl methionine domain containing 2                                              | BB741897  | 10.3576 | 9.0459  | 1.3117 |
| 1454671_at   | Insig1        | insulin induced gene 1                                                                         | BB005488  | 11.3509 | 10.0406 | 1.3103 |
| 1444257_at   | Prr11         | proline rich 11                                                                                | BB208466  | 7.7740  | 6.4641  | 1.3099 |
| 1453972_x_at | Med1          | mediator complex subunit 1                                                                     | AK005207  | 5.6685  | 4.3588  | 1.3098 |
| 1437491_at   | Bicd2         | bicaudal D homolog 2 (Drosophila)                                                              | BI793514  | 5.5422  | 4.2333  | 1.3089 |
| 1448059_at   | Mipol1        | mirror-image polydactyly gene 1 homolog (human)                                                | BE655476  | 5.6676  | 4.3588  | 1.3089 |
| 1455794_at   | Smtnl2        | smoothelin-like 2                                                                              | BB458758  | 6.1307  | 4.8229  | 1.3078 |
| 1423748_at   | Pdk1          | pyruvate dehydrogenase kinase, isoenzyme 1                                                     | BC027196  | 10.3314 | 9.0254  | 1.3061 |
| 1449542_at   | Pbx1          | pre B cell leukemia homeobox 1                                                                 | NM_008783 | 6.7532  | 5.4477  | 1.3055 |
| 1431745_a_at | Zc3h14        | zinc finger CCCH type containing 14                                                            | AK006009  | 10.5332 | 9.2280  | 1.3052 |
| 1418954_at   | Camkk1        | calcium/calmodulin-dependent protein kinase kinase 1, alpha                                    | NM_018883 | 7.1076  | 5.8041  | 1.3035 |
| 1438774_s_at | Pgm2l1        | phosphoglucomutase 2-like 1                                                                    | AW702170  | 6.4952  | 5.1918  | 1.3034 |
| 1416401_at   | Cd82          | CD82 antigen                                                                                   | NM_007656 | 10.1498 | 8.8464  | 1.3034 |
| 1421424_a_at | Anpep         | alanyl (membrane) aminopeptidase                                                               | NM_008486 | 5.2733  | 3.9701  | 1.3032 |
| 1448601_s_at | Msx1          | homeobox, msh-like 1                                                                           | BC016426  | 7.1072  | 5.8041  | 1.3031 |
| 1426519_at   | P4ha1         | procollagen-proline, 2-oxoglutarate 4-dioxygenase (proline 4-hydroxylase), alpha 1 polypeptide | AI314028  | 8.0108  | 6.7079  | 1.3028 |
| 1436978_at   | Wnt9a         | wingless-type MMTV integration site 9A                                                         | AV273409  | 5.1786  | 3.8760  | 1.3026 |
| 1421997_s_at | Itga3         | integrin alpha 3                                                                               | NM_013565 | 7.0658  | 5.7635  | 1.3023 |
| 1427540_at   | Zwint         | ZW10 interactor                                                                                | BC013559  | 8.2234  | 6.9213  | 1.3021 |
| 1420506_a_at | Stxbp1        | syntaxin binding protein 1                                                                     | AF326545  | 6.6421  | 5.3414  | 1.3007 |
| 1452071_at   | Slc4a4        | solute carrier family 4 (anion exchanger), member 4                                            | BE655147  | 5.7996  | 4.4990  | 1.3007 |
| 1429527_a_at | Plscr1        | phospholipid scramblase 1                                                                      | BF319989  | 9.8540  | 8.5541  | 1.2999 |
| 1448828_at   | Smc6          | structural maintenance of chromosomes 6                                                        | AV281575  | 10.2190 | 8.9215  | 1.2975 |
| 1425479_at   | Smyd5         | SET and MYND domain containing 5                                                               | BF160651  | 7.2969  | 5.9995  | 1.2974 |
| 1435467_at   | Fgd6          | FYVE, RhoGEF and PH domain containing 6                                                        | BM936783  | 7.2562  | 5.9590  | 1.2972 |
| 1425550_a_at | Prkar1a       | protein kinase, cAMP dependent regulatory, type I, alpha                                       | BC005697  | 11.4207 | 10.1235 | 1.2972 |
| 1450622_at   | Bcar1         | breast cancer anti-estrogen resistance 1                                                       | NM_009954 | 8.3244  | 7.0284  | 1.2960 |
| 1448183_a_at | Hif1a         | hypoxia inducible factor 1, alpha subunit                                                      | BB269715  | 6.6366  | 5.3414  | 1.2952 |
| 1451365_at   | Rbm19         | RNA binding motif protein 19                                                                   | BC025619  | 7.0503  | 5.7555  | 1.2948 |
| 1453392_at   | Ttc39b        | tetratricopeptide repeat domain 39B                                                            | AK007856  | 6.9332  | 5.6402  | 1.2930 |
| 1424149_at   | Nsmce2        | non-SMC element 2 homolog (MMS21, S. cerevisiae)                                               | BC009125  | 10.5834 | 9.2913  | 1.2922 |
| 1450005_x_at | Dlk2          | delta-like 2 homolog (Drosophila)                                                              | NM_134120 | 7.2083  | 5.9163  | 1.2920 |
| 1417541_at   | Hells         | helicase, lymphoid specific                                                                    | NM_008234 | 10.6832 | 9.3913  | 1.2918 |
| 1450410_a_at | Slc48a1       | solute carrier family 48 (heme transporter), member 1                                          | BC022913  | 10.2639 | 8.9728  | 1.2911 |
| 1450288_at   | Cdh6          | cadherin 6                                                                                     | NM_007666 | 8.3304  | 7.0394  | 1.2910 |
| 1440163_at   | Setd3         | SET domain containing 3                                                                        | BB392503  | 6.7672  | 5.4771  | 1.2901 |
| 1444406_at   |               |                                                                                                | AI504848  | 6.5730  | 5.2840  | 1.2890 |
| 1453708_a_at | Gsto2         | glutathione S-transferase omega 2                                                              | AK019582  | 5.0544  | 3.7657  | 1.2887 |
| 1447787_x_at | Gjc1          | gap junction protein, gamma 1                                                                  | AV148957  | 9.5239  | 8.2362  | 1.2877 |
| 1439770_at   | 6430598A04Rik | RIKEN cDNA 6430598A04 gene                                                                     | BB387298  | 8.6643  | 7.3768  | 1.2874 |
| 1427650_a_at | Runx1         | runt related transcription factor 1                                                            | D13802    | 7.8288  | 6.5424  | 1.2864 |
| 1444543_at   |               |                                                                                                | BI901592  | 5.6555  | 4.3697  | 1.2857 |
| 1450878_at   | Sri           | sorcin                                                                                         | AK008404  | 10.7886 | 9.5040  | 1.2846 |
| 1423122_at   | Avpi1         | arginine vasopressin-induced 1                                                                 | BI649826  | 10.4233 | 9.1388  | 1.2845 |
| 1460678_at   | Klhd2         | kelch domain containing 2                                                                      | BC005581  | 10.3846 | 9.1012  | 1.2834 |
| 1453012_at   | Tsc22d2       | TSC22 domain family, member 2                                                                  | AK017449  | 5.8297  | 4.5467  | 1.2831 |
| 1426663_s_at | Slc45a3       | solute carrier family 45, member 3                                                             | BC024519  | 5.0487  | 3.7657  | 1.2830 |
| 1418035_a_at | Prim2         | DNA primase, p58 subunit                                                                       | NM_008922 | 9.4949  | 8.2121  | 1.2828 |
| 1425988_a_at | Hipk1         | homeodomain interacting protein kinase 1                                                       | AF071071  | 5.7207  | 4.4379  | 1.2828 |
| 1456909_at   | Gpi1          | glucose phosphate isomerase 1                                                                  | BF017016  | 8.6155  | 7.3328  | 1.2827 |
| 1424192_at   | 1500011H22Rik | RIKEN cDNA 1500011H22 gene                                                                     | BC019498  | 10.7700 | 9.4876  | 1.2824 |
| 1456479_at   | Snx30         | sorting nexin family member 30                                                                 | BB359719  | 8.4706  | 7.1886  | 1.2820 |
| 1417126_a_at | Rpl22l1       | ribosomal protein L22 like 1                                                                   | NM_026517 | 12.2622 | 10.9805 | 1.2817 |
| 1427282_a_at | Fxn           | frataxin                                                                                       | AV007132  | 8.4963  | 7.2147  | 1.2816 |
| 1455810_a_at | Arhgef40      | Rho guanine nucleotide exchange factor (GEF) 40                                                | BI412259  | 6.9214  | 5.6402  | 1.2812 |
| 1427322_at   | Brwd1         | bromodomain and WD repeat domain containing 1                                                  | BQ031260  | 6.6421  | 5.3622  | 1.2799 |
| 1444402_at   | Zc3h12c       | zinc finger CCCH type containing 12C                                                           | BB383429  | 7.4406  | 6.1607  | 1.2799 |
| 1436052_at   | 1700020O03Rik | RIKEN cDNA 1700020O03 gene                                                                     | AW494764  | 7.9767  | 6.6978  | 1.2789 |

|              |               |                                                                                                   |           |         |         |        |
|--------------|---------------|---------------------------------------------------------------------------------------------------|-----------|---------|---------|--------|
| 1420829_a_at | Ywhaq         | tyrosine 3-monooxygenase/tryptophan 5-monooxygenase activation protein, theta polypeptide         | NM_011739 | 11.7296 | 10.4507 | 1.2788 |
| 1419061_at   | Rhod          | ras homolog gene family, member D                                                                 | D89821    | 8.6913  | 7.4126  | 1.2787 |
| 1450402_at   | Med1          | mediator complex subunit 1                                                                        | BB760479  | 6.9841  | 5.7061  | 1.2779 |
| 1417240_at   | Zyx           | zyxin                                                                                             | NM_011777 | 8.7925  | 7.5153  | 1.2772 |
| 1429104_at   | Limd2         | LIM domain containing 2                                                                           | AK012581  | 8.8493  | 7.5729  | 1.2764 |
| 1436985_at   | Zfp644        | zinc finger protein 644                                                                           | BM115349  | 8.1974  | 6.9213  | 1.2761 |
| 1443208_at   |               |                                                                                                   | BB056087  | 5.9357  | 4.6607  | 1.2750 |
| 1456878_at   | AI646023      | expressed sequence AI646023                                                                       | BE910952  | 5.2530  | 3.9783  | 1.2747 |
| 1448834_at   | Foxm1         | forkhead box M1                                                                                   | NM_008021 | 8.6662  | 7.3941  | 1.2721 |
| 1448383_at   | Mmp14         | matrix metalloproteinase 14 (membrane-inserted)                                                   | NM_008608 | 10.0529 | 8.7810  | 1.2720 |
| 1453343_s_at | Vrk2          | vaccinia related kinase 2                                                                         | AK012664  | 9.2005  | 7.9285  | 1.2719 |
| 1429822_at   | 4633401B06Rik | RIKEN cDNA 4633401B06 gene                                                                        | AK014609  | 5.8297  | 4.5580  | 1.2717 |
| 1430367_at   | Stambpl1      | STAM binding protein like 1                                                                       | BE331859  | 6.5578  | 5.2864  | 1.2713 |
| 1451110_at   | Egln1         | EGL nine homolog 1 (C. elegans)                                                                   | BE995700  | 9.3551  | 8.0841  | 1.2710 |
| 1423319_at   | Hhex          | hematopoietically expressed homeobox                                                              | AK014111  | 7.1586  | 5.8877  | 1.2709 |
| 1426950_at   | Parp16        | poly (ADP-ribose) polymerase family, member 16                                                    | BC014731  | 7.7674  | 6.4965  | 1.2709 |
| 1456784_at   | Gm14137       | predicted gene 14137                                                                              | BB011034  | 6.5001  | 5.2306  | 1.2694 |
| 1458667_at   | Ninl          | ninein-like                                                                                       | AV266695  | 7.0226  | 5.7532  | 1.2694 |
| 1427915_s_at | Tceb1         | transcription elongation factor B (SIII), polypeptide 1                                           | AI019214  | 5.5658  | 4.2966  | 1.2691 |
| 1456779_a_at | 4930414L22Rik | RIKEN cDNA 4930414L22 gene                                                                        | BQ176011  | 5.1716  | 3.9024  | 1.2691 |
| 1438993_a_at | Atp6v1d       | ATPase, H+ transporting, lysosomal V1 subunit D                                                   | AV105788  | 10.4211 | 9.1524  | 1.2687 |
| 1446130_at   | Mir1931       | microRNA 1931                                                                                     | AW557530  | 6.0777  | 4.8096  | 1.2681 |
| 1416754_at   | Prkar1b       | protein kinase, cAMP dependent regulatory, type I beta                                            | NM_008923 | 6.2005  | 4.9325  | 1.2680 |
| 1444507_at   | Usp53         | ubiquitin specific peptidase 53                                                                   | BQ033939  | 6.6865  | 5.4189  | 1.2676 |
| 1433953_at   | Zfp277        | zinc finger protein 277                                                                           | BQ176535  | 9.2717  | 8.0049  | 1.2668 |
| 1419300_at   | Flt1          | FMS-like tyrosine kinase 1                                                                        | NM_010228 | 7.7042  | 6.4376  | 1.2666 |
| 1460671_at   | Gpx1          | glutathione peroxidase 1                                                                          | BI219063  | 12.3945 | 11.1281 | 1.2663 |
| 1448942_at   | Gng11         | guanine nucleotide binding protein (G protein), gamma 11                                          | NM_025331 | 9.2813  | 8.0161  | 1.2652 |
| 1433869_at   | Zxdc          | ZXD family zinc finger C                                                                          | BB278670  | 8.7831  | 7.5184  | 1.2647 |
| 1448688_at   | Podxl         | podocalyxin-like                                                                                  | AF290209  | 9.1254  | 7.8609  | 1.2645 |
| 1451567_a_at | lfi203        | interferon activated gene 203                                                                     | BC008167  | 7.1506  | 5.8877  | 1.2629 |
| 1438412_at   |               |                                                                                                   | BM119726  | 6.4574  | 5.1952  | 1.2622 |
| 1459301_at   |               |                                                                                                   | AW546127  | 5.8181  | 4.5566  | 1.2615 |
| 1435762_at   | Pacs1         | phosphofurin acidic cluster sorting protein 1                                                     | BM115617  | 7.7948  | 6.5340  | 1.2608 |
| 1430047_at   | Ankrd32       | ankyrin repeat domain 32                                                                          | AK012253  | 6.7048  | 5.4443  | 1.2605 |
| 1424559_at   | Rpap2         | RNA polymerase II associated protein 2                                                            | BC021895  | 8.7358  | 7.4777  | 1.2581 |
| 1438989_s_at | B130021B11Rik | RIKEN cDNA B130021B11 gene                                                                        | BB386167  | 11.2626 | 10.0046 | 1.2580 |
| 1427962_at   | Ccdc102a      | coiled-coil domain containing 102A                                                                | BG072723  | 8.6942  | 7.4364  | 1.2578 |
| 1434410_at   | Crybg3        | beta-gamma crystallin domain containing 3                                                         | AV276428  | 6.2680  | 5.0107  | 1.2573 |
| 1456735_x_at | Acpl2         | acid phosphatase-like 2                                                                           | BB458645  | 9.4253  | 8.1681  | 1.2572 |
| 1433901_at   | Caprin1       | cell cycle associated protein 1                                                                   | AV301998  | 10.9055 | 9.6484  | 1.2571 |
| 1418166_at   | Il12rb1       | interleukin 12 receptor, beta 1                                                                   | NM_008353 | 5.6970  | 4.4400  | 1.2570 |
| 1452861_at   | 2010300C02Rik | RIKEN cDNA 2010300C02 gene                                                                        | AK008485  | 5.6970  | 4.4400  | 1.2570 |
| 1449096_at   | Ccdc127       | coiled-coil domain containing 127                                                                 | NM_024201 | 9.6104  | 8.3541  | 1.2564 |
| 1418467_at   | Smarcd3       | SWI/SNF related, matrix associated, actin dependent regulator of chromatin, subfamily d, member 3 | NM_025891 | 8.0621  | 6.8057  | 1.2564 |
| 1416214_at   | Mcm4          | minichromosome maintenance deficient 4 homolog (S. cerevisiae)                                    | BC013094  | 11.9576 | 10.7015 | 1.2561 |
| 1431279_s_at | Ttl5          | tubulin tyrosine ligase-like family, member 5                                                     | AK016145  | 8.0618  | 6.8057  | 1.2561 |
| 1436914_at   | Ctdspl2       | CTD (carboxy-terminal domain, RNA polymerase II, polypeptide A) small                             | BB524458  | 8.5761  | 7.3208  | 1.2553 |
| 1417574_at   | Cxcl12        | chemokine (C-X-C motif) ligand 12                                                                 | NM_013655 | 5.3415  | 4.0863  | 1.2552 |
| 1427225_at   | Epn2          | epsin 2                                                                                           | AF057286  | 9.7513  | 8.4967  | 1.2546 |
| 1451151_s_at | Zfp410        | zinc finger protein 410                                                                           | BC021528  | 9.3646  | 8.1114  | 1.2532 |
| 1435086_s_at | Klhc2         | kelch domain containing 2                                                                         | AV298107  | 11.2207 | 9.9677  | 1.2530 |
| 1416406_at   | Pea15a        | phosphoprotein enriched in astrocytes 15A                                                         | AI323543  | 8.1979  | 6.9450  | 1.2529 |
| 1430604_a_at | Dab2          | disabled 2, mitogen-responsive phosphoprotein                                                     | AW986632  | 5.2228  | 3.9701  | 1.2527 |
| 1427226_at   | Epn2          | epsin 2                                                                                           | AF057286  | 9.1243  | 7.8716  | 1.2527 |
| 1452239_at   | Gt(ROSA)26Sor | gene trap ROSA 26, Philippe Soriano                                                               | U83174    | 8.7532  | 7.5015  | 1.2517 |
| 1444387_at   | Nmt2          | N-myristoyltransferase 2                                                                          | BB409982  | 7.2562  | 6.0047  | 1.2515 |
| 1450449_a_at | Rilpl1        | Rab interacting lysosomal protein-like 1                                                          | NM_021430 | 8.8430  | 7.5915  | 1.2515 |



|              |               |                                                                   |           |         |        |        |
|--------------|---------------|-------------------------------------------------------------------|-----------|---------|--------|--------|
| 1434223_at   | Oscp1         | organic solute carrier partner 1                                  | BG695079  | 7.3918  | 6.1404 | 1.2514 |
| 1426325_at   | Kif1c         | kinesin family member 1C                                          | AB074017  | 6.6275  | 5.3765 | 1.2510 |
| 1437122_at   |               |                                                                   | BM119782  | 6.7699  | 5.5196 | 1.2503 |
| 1421111_at   | Rybp          | RING1 and YY1 binding protein                                     | NM_019743 | 7.5877  | 6.3376 | 1.2501 |
| 1429096_at   | 2810455D13Rik | RIKEN cDNA 2810455D13 gene                                        | AK013353  | 6.8973  | 5.6475 | 1.2499 |
| 1449476_at   | Stk30         | serine/threonine kinase 30                                        | NM_011973 | 7.3486  | 6.0989 | 1.2497 |
| 1441097_at   | Vangl1        | vang-like 1 (van gogh, Drosophila)                                | AI593475  | 6.4413  | 5.1918 | 1.2496 |
| 1428828_at   | Rpain         | RPA interacting protein                                           | AK010289  | 9.3462  | 8.0968 | 1.2495 |
| 1438301_at   |               |                                                                   | BG064109  | 6.4791  | 5.2306 | 1.2485 |
| 1450967_at   | Ptplad2       | protein tyrosine phosphatase-like A domain containing 2           | AV291250  | 8.1031  | 6.8548 | 1.2483 |
| 1426404_a_at | Rnf11         | ring finger protein 11                                            | B1150320  | 9.8136  | 8.5656 | 1.2480 |
| 1426370_at   | Far1          | fatty acyl CoA reductase 1                                        | BG094874  | 8.6330  | 7.3855 | 1.2475 |
| 1426576_at   | Sgms1         | sphingomyelin synthase 1                                          | BE629162  | 7.5488  | 6.3015 | 1.2473 |
| 1436229_at   | Fam126b       | family with sequence similarity 126, member B                     | BB256501  | 7.7740  | 6.5268 | 1.2471 |
| 1426226_at   | Dyrk1a        | dual-specificity tyrosine-(Y)-phosphorylation regulated kinase 1a | U58497    | 6.3015  | 5.0544 | 1.2471 |
| 1435077_at   | Asxl1         | additional sex combs like 1                                       | BE956516  | 8.8826  | 7.6361 | 1.2465 |
| 1423656_x_at | Ctc1          | CTS telomere maintenance complex component 1                      | BC014687  | 9.0898  | 7.8447 | 1.2451 |
| 1428416_at   | Fam164a       | family with sequence similarity 164, member A                     | BE198251  | 8.3490  | 7.1041 | 1.2449 |
| 1424456_at   | Pvrl2         | poliovirus receptor-related 2                                     | BC009088  | 8.1660  | 6.9213 | 1.2446 |
| 1416347_at   | Men1          | multiple endocrine neoplasia 1                                    | AB023401  | 7.8215  | 6.5782 | 1.2433 |
| 1419712_at   | Il3ra         | interleukin 3 receptor, alpha chain                               | NM_008369 | 6.1145  | 4.8719 | 1.2426 |
| 1417319_at   | Pvrl3         | poliovirus receptor-related 3                                     | NM_021495 | 5.6110  | 4.3691 | 1.2419 |
| 1428466_at   | Chd3          | chromodomain helicase DNA binding protein 3                       | AK011183  | 8.1452  | 6.9036 | 1.2416 |
| 1456256_at   | Eif5          | eukaryotic translation initiation factor 5                        | BM242785  | 8.8905  | 7.6496 | 1.2409 |
| 1429264_at   | Fam120aos     | family with sequence similarity 120A opposite strand              | AK021143  | 7.6307  | 6.3902 | 1.2405 |
| 1445128_at   |               |                                                                   | BQ176646  | 6.2392  | 4.9987 | 1.2405 |
| 1451765_a_at | Entpd5        | ectonucleoside triphosphate diphosphohydrolase 5                  | AF136571  | 6.6165  | 5.3765 | 1.2400 |
| 1434279_at   |               |                                                                   | BG976607  | 8.6081  | 7.3681 | 1.2400 |
| 1456434_x_at | Hspb8         | heat shock protein 8                                              | BB764222  | 7.2765  | 6.0379 | 1.2387 |
| 1440091_at   | Meis2         | Meis homeobox 2                                                   | BB212184  | 5.7948  | 4.5566 | 1.2382 |
| 1417602_at   | Per2          | period homolog 2 (Drosophila)                                     | AF035830  | 5.5953  | 4.3588 | 1.2366 |
| 1442595_at   | Gm2115        | predicted gene 2115                                               | BE943953  | 5.6758  | 4.4400 | 1.2358 |
| 1459218_at   | Heatr7a       | HEAT repeat containing 7A                                         | BB142087  | 6.2549  | 5.0191 | 1.2357 |
| 1438699_at   | Srd5a1        | steroid 5 alpha-reductase 1                                       | AA530749  | 8.0040  | 6.7683 | 1.2356 |
| 1417470_at   | Apobec3       | apolipoprotein B mRNA editing enzyme, catalytic polypeptide 3     | NM_030255 | 8.8177  | 7.5840 | 1.2336 |
| 1453550_a_at | Far1          | fatty acyl CoA reductase 1                                        | AK011187  | 6.6801  | 5.4468 | 1.2332 |
| 1437979_at   | Zcchc2        | zinc finger, CCHC domain containing 2                             | AI503515  | 5.3481  | 4.1167 | 1.2314 |
| 1437110_at   | 2810474O19Rik | RIKEN cDNA 2810474O19 gene                                        | BM232998  | 10.2247 | 8.9959 | 1.2288 |
| 1435059_at   | Asap1         | ArfGAP with SH3 domain, ankyrin repeat and PH domain1             | BM937495  | 10.2312 | 9.0034 | 1.2278 |
| 1451036_at   | Spg21         | spastic paraplegia 21 homolog (human)                             | BB095517  | 10.0860 | 8.8584 | 1.2276 |
| 1429201_at   | Cyld          | cylindromatosis (turban tumor syndrome)                           | AK013508  | 7.8693  | 6.6421 | 1.2272 |
| 1429082_at   | Ankle2        | ankyrin repeat and LEM domain containing 2                        | BM227962  | 8.6578  | 7.4308 | 1.2270 |
| 1445781_at   |               |                                                                   | BG072274  | 6.4574  | 5.2306 | 1.2268 |
| 1452063_at   | Zbtb8a        | zinc finger and BTB domain containing 8a                          | AK010736  | 5.9590  | 4.7323 | 1.2267 |
| 1437558_at   | B130021B11Rik | RIKEN cDNA B130021B11 gene                                        | BM119919  | 9.5069  | 8.2812 | 1.2257 |
| 1419435_at   | Aox1          | aldehyde oxidase 1                                                | NM_009676 | 6.4574  | 5.2321 | 1.2253 |
| 1435947_at   | Ptar1         | protein prenyltransferase alpha subunit repeat containing 1       | BQ175669  | 8.8005  | 7.5765 | 1.2240 |
| 1436323_at   | 2810001A02Rik | RIKEN cDNA 2810001A02 gene                                        | BE952576  | 9.4211  | 8.1974 | 1.2237 |
| 1453182_a_at | Smpd4         | sphingomyelin phosphodiesterase 4                                 | BB220041  | 8.4117  | 7.1886 | 1.2231 |
| 1434895_s_at | Ppp1r13b      | protein phosphatase 1, regulatory (inhibitor) subunit 13B         | BG064715  | 8.3057  | 7.0828 | 1.2230 |
| 1440461_at   |               |                                                                   | BB229269  | 6.2772  | 5.0544 | 1.2227 |
| 1459171_at   | Emp1          | epithelial membrane protein 1                                     | BG075300  | 7.5422  | 6.3197 | 1.2225 |
| 1451220_at   | Wdr20a        | WD repeat domain 20A                                              | BC026761  | 8.6165  | 7.3941 | 1.2224 |
| 1448351_at   | Coro1b        | coronin, actin binding protein 1B                                 | NM_011778 | 9.5721  | 8.3497 | 1.2224 |
| 1444746_at   |               |                                                                   | BM195033  | 7.7674  | 6.5449 | 1.2224 |
| 1455384_x_at | D030056L22Rik | RIKEN cDNA D030056L22 gene                                        | BB256746  | 9.0936  | 7.8716 | 1.2220 |
| 1435589_at   | Ccdc85b       | coiled-coil domain containing 85B                                 | AV308222  | 9.5198  | 8.2986 | 1.2211 |
| 1424372_at   | Mrpl32        | mitochondrial ribosomal protein L32                               | AF279255  | 10.7032 | 9.4823 | 1.2210 |
| 1433808_at   | Heatr7a       | HEAT repeat containing 7A                                         | BB473496  | 9.3171  | 8.0968 | 1.2203 |

|              |               |                                                                      |           |         |         |        |
|--------------|---------------|----------------------------------------------------------------------|-----------|---------|---------|--------|
| 1422916_at   | Fgf21         | fibroblast growth factor 21                                          | NM_020013 | 5.8877  | 4.6674  | 1.2203 |
| 1429588_at   | 2810474O19Rik | RIKEN cDNA 2810474O19 gene                                           | AA509870  | 10.1847 | 8.9645  | 1.2203 |
| 1435787_at   | Ppm1l         | protein phosphatase 1 (formerly 2C)-like                             | BB035578  | 8.2662  | 7.0460  | 1.2202 |
| 1427232_at   | Tshz1         | teashirt zinc finger family member 1                                 | AV291373  | 8.6561  | 7.4364  | 1.2198 |
| 1436294_at   | Ankrd29       | ankyrin repeat domain 29                                             | AV337707  | 5.3033  | 4.0849  | 1.2184 |
| 1419652_s_at | Nkain1        | Na <sup>+</sup> /K <sup>+</sup> transporting ATPase interacting 1    | AK009389  | 7.4774  | 6.2609  | 1.2165 |
| 1444119_at   | Fam168a       | family with sequence similarity 168, member A                        | AW538756  | 6.8852  | 5.6689  | 1.2163 |
| 1435630_s_at |               |                                                                      | AV148646  | 12.1315 | 10.9154 | 1.2161 |
| 1438488_at   | Esd           | esterase D/formylglutathione hydrolase                               | BB448921  | 5.2104  | 3.9943  | 1.2161 |
| 1448487_at   | Lrrfp1        | leucine rich repeat (in FLII) interacting protein 1                  | NM_008515 | 8.8076  | 7.5915  | 1.2161 |
| 1429555_at   | Cldn25        | claudin 25                                                           | AA408371  | 8.3946  | 7.1787  | 1.2160 |
| 1448860_at   | Rem2          | rad and gem related GTP binding protein 2                            | NM_080726 | 7.2935  | 6.0777  | 1.2158 |
| 1433539_at   | Commd3        | COMM domain containing 3                                             | BB230296  | 10.6319 | 9.4169  | 1.2150 |
| 1423879_at   | D030056L22Rik | RIKEN cDNA D030056L22 gene                                           | BC020125  | 9.6176  | 8.4032  | 1.2144 |
| 1437900_at   | 4930523C07Rik | RIKEN cDNA 4930523C07 gene                                           | AV032877  | 7.6880  | 6.4737  | 1.2143 |
| 1418481_at   | Pkmyt1        | protein kinase, membrane associated tyrosine/threonine 1             | NM_023058 | 9.3738  | 8.1609  | 1.2129 |
| 1456072_at   | Ppp1r9a       | protein phosphatase 1, regulatory (inhibitor) subunit 9A             | AU067663  | 5.3163  | 4.1035  | 1.2128 |
| 1436591_at   | Vsig10        | V-set and immunoglobulin domain containing 10                        | BE553782  | 7.3258  | 6.1131  | 1.2126 |
| 1453298_at   | Ptpn21        | protein tyrosine phosphatase, non-receptor type 21                   | AK013777  | 5.8141  | 4.6015  | 1.2126 |
| 1439857_at   |               |                                                                      | BB206180  | 6.4811  | 5.2685  | 1.2126 |
| 1459681_at   |               |                                                                      | AI451554  | 7.3323  | 6.1198  | 1.2125 |
| 1457830_at   |               |                                                                      | AV247312  | 5.3193  | 4.1074  | 1.2119 |
| 1428374_at   | Glce          | glucuronyl C5-epimerase                                              | AK003758  | 9.7537  | 8.5425  | 1.2112 |
| 1429971_at   | Txnrd2        | thioredoxin reductase 2                                              | BE948556  | 5.9831  | 4.7725  | 1.2106 |
| 1425000_s_at | 5430407P10Rik | RIKEN cDNA 5430407P10 gene                                           | BC025867  | 5.8632  | 4.6535  | 1.2096 |
| 1445559_at   |               |                                                                      | BB762499  | 6.1291  | 4.9195  | 1.2096 |
| 1420150_at   | Spsb1         | splA/ryanodine receptor domain and SOCS box containing 1             | AI596360  | 8.1660  | 6.9566  | 1.2093 |
| 1416572_at   | Mmp14         | matrix metalloproteinase 14 (membrane-inserted)                      | NM_008608 | 6.2200  | 5.0107  | 1.2093 |
| 1423524_at   | Mastl         | microtubule associated serine/threonine kinase-like                  | BF021309  | 8.0779  | 6.8688  | 1.2091 |
| 1451427_a_at | Egfl7         | EGF-like domain 7                                                    | BC024610  | 7.7805  | 6.5730  | 1.2075 |
| 1434002_at   | Foxn3         | forkhead box N3                                                      | AW556347  | 8.1151  | 6.9076  | 1.2075 |
| 1418763_at   | Nit2          | nitrilase family, member 2                                           | BC020153  | 8.8524  | 7.6454  | 1.2070 |
| 1416951_a_at | Atp6v1d       | ATPase, H <sup>+</sup> transporting, lysosomal V1 subunit D          | NM_023721 | 10.5443 | 9.3379  | 1.2064 |
| 1450721_at   | Acp1          | acid phosphatase 1, soluble                                          | AW554436  | 11.8349 | 10.6286 | 1.2063 |
| 1451893_s_at | Magi1         | membrane associated guanylate kinase, WW and PDZ domain containing 1 | AF027503  | 8.2232  | 7.0173  | 1.2059 |
| 1436349_at   | 2700094K13Rik | RIKEN cDNA 2700094K13 gene                                           | BI408855  | 12.2372 | 11.0313 | 1.2058 |
| 1424720_at   | Mgat4b        | mannoside acetylglucosaminyltransferase 4, isoenzyme B               | BC026638  | 10.9841 | 9.7784  | 1.2057 |
| 1453171_s_at | Ppm1a         | protein phosphatase 1A, magnesium dependent, alpha isoform           | C85630    | 9.1520  | 7.9464  | 1.2055 |
| 1457687_at   | Bcl2          | B cell leukemia/lymphoma 2                                           | BI664467  | 8.9987  | 7.7936  | 1.2051 |
| 1440920_at   | Mmp14         | matrix metalloproteinase 14 (membrane-inserted)                      | BB535404  | 8.4417  | 7.2372  | 1.2045 |
| 1418099_at   | Tnfrsf1b      | tumor necrosis factor receptor superfamily, member 1b                | M60469    | 8.2894  | 7.0851  | 1.2043 |
| 1425187_at   | Sel1l         | sel-1 suppressor of lin-12-like (C. elegans)                         | BC026816  | 8.4667  | 7.2627  | 1.2040 |
| 1450269_a_at | Pfkl          | phosphofructokinase, liver, B-type                                   | NM_008826 | 9.1460  | 7.9424  | 1.2037 |
| 1432006_at   | Ap2a2         | adaptor protein complex AP-2, alpha 2 subunit                        | AK009735  | 6.9269  | 5.7245  | 1.2024 |
| 1451992_at   | Adrbk1        | adrenergic receptor kinase, beta 1                                   | AF333028  | 9.0658  | 7.8634  | 1.2023 |
| 1448034_at   | Inca1         | inhibitor of CDK, cyclin A1 interacting protein 1                    | AA215276  | 5.6402  | 4.4383  | 1.2019 |
| 1419649_s_at | Myo1c         | myosin IC                                                            | NM_008659 | 11.3699 | 10.1706 | 1.1993 |
| 1418126_at   | Ccl5          | chemokine (C-C motif) ligand 5                                       | NM_013653 | 9.6003  | 8.4011  | 1.1992 |
| 1430228_at   | Dtl           | denticleless homolog (Drosophila)                                    | AV308327  | 7.6064  | 6.4073  | 1.1991 |
| 1425537_at   | Ppm1a         | protein phosphatase 1A, magnesium dependent, alpha isoform           | AF259672  | 8.6088  | 7.4097  | 1.1991 |
| 1429623_at   | Zfp644        | zinc finger protein 644                                              | AV261187  | 8.5066  | 7.3077  | 1.1990 |
| 1425196_a_at | Hint2         | histidine triad nucleotide binding protein 2                         | AF356874  | 5.5812  | 4.3824  | 1.1988 |
| 1424448_at   | Trim6         | tripartite motif-containing 6                                        | BC026912  | 6.8313  | 5.6327  | 1.1986 |
| 1434546_at   | Smg5          | Smg-5 homolog, nonsense mediated mRNA decay factor (C. elegans)      | BI106637  | 8.9363  | 7.7384  | 1.1979 |
| 1453181_x_at | Plscr1        | phospholipid scramblase 1                                            | BF319989  | 9.8535  | 8.6566  | 1.1969 |
| 1420645_at   | Pcgf2         | polycomb group ring finger 2                                         | NM_009545 | 5.6368  | 4.4400  | 1.1968 |
| 1452132_at   | Tlcd1         | TLC domain containing 1                                              | BE951033  | 8.1061  | 6.9094  | 1.1967 |

|              |               |                                                                                       |           |         |        |        |
|--------------|---------------|---------------------------------------------------------------------------------------|-----------|---------|--------|--------|
| 1449483_at   | Polk          | polymerase (DNA directed), kappa                                                      | BC008105  | 9.6188  | 8.4222 | 1.1966 |
| 1423129_at   | Shoc2         | soc-2 (suppressor of clear) homolog (C. elegans)                                      | BQ032685  | 8.6048  | 7.4083 | 1.1965 |
| 1428433_at   | Hipk2         | homeodomain interacting protein kinase 2                                              | AK003718  | 8.1914  | 6.9953 | 1.1961 |
| 1449097_at   | Txnrd2        | thioredoxin reductase 2                                                               | NM_013711 | 7.7384  | 6.5424 | 1.1960 |
| 1429613_at   | Dusp28        | dual specificity phosphatase 28                                                       | BE986076  | 7.5278  | 6.3320 | 1.1958 |
| 1453541_at   | Pfkl          | phosphofructokinase, liver, B-type                                                    | BM232561  | 6.5176  | 5.3224 | 1.1952 |
| 1426875_s_at | Srxn1         | sulfiredoxin 1 homolog (S. cerevisiae)                                                | BM210600  | 8.7788  | 7.5840 | 1.1947 |
| 1451123_at   | N4bp3         | NEDD4 binding protein 3                                                               | BC006740  | 8.5541  | 7.3594 | 1.1947 |
| 1445328_at   | Col4a4        | collagen, type IV, alpha 4                                                            | BB530633  | 5.0544  | 3.8599 | 1.1945 |
| 1428417_at   | Fam164a       | family with sequence similarity 164, member A                                         | BE198251  | 8.6553  | 7.4611 | 1.1942 |
| 1419549_at   | Arg1          | arginase, liver                                                                       | NM_007482 | 5.2306  | 4.0372 | 1.1935 |
| 1427418_a_at | Hif1a         | hypoxia inducible factor 1, alpha subunit                                             | X95580    | 11.1493 | 9.9560 | 1.1933 |
| 1433439_at   |               |                                                                                       | BG071103  | 10.1660 | 8.9731 | 1.1929 |
| 1426034_a_at | Runx2         | runt related transcription factor 2                                                   | AF005936  | 5.9122  | 4.7207 | 1.1915 |
| 1448037_at   | Zcchc6        | zinc finger, CCHC domain containing 6                                                 | BI695361  | 7.1270  | 5.9357 | 1.1913 |
| 1427809_at   |               |                                                                                       | BC010480  | 5.9119  | 4.7207 | 1.1912 |
| 1417384_at   | Entpd5        | ectonucleoside triphosphate diphosphohydrolase 5                                      | NM_007647 | 6.8313  | 5.6402 | 1.1911 |
| 1433998_at   | 4933427D14Rik | RIKEN cDNA 4933427D14 gene                                                            | BM199807  | 8.9515  | 7.7607 | 1.1908 |
| 1438888_at   | Gmcl1         | germ cell-less homolog 1 (Drosophila)                                                 | BM239632  | 5.3765  | 4.1858 | 1.1907 |
| 1425640_at   | Aff1          | AF4/FMR2 family, member 1                                                             | BB586268  | 6.4211  | 5.2306 | 1.1905 |
| 1457404_at   | Nfkbiz        | nuclear factor of kappa light polypeptide gene enhancer in B cells inhibitor, zeta    | BM240058  | 8.0217  | 6.8313 | 1.1904 |
| 1416342_at   | Tnc           | tenascin C                                                                            | NM_011607 | 5.4235  | 4.2333 | 1.1901 |
| 1428708_x_at | Ptms          | parathyrosin                                                                          | AK011360  | 10.9277 | 9.7376 | 1.1901 |
| 1448497_at   | Erc3          | excision repair cross-complementing rodent repair deficiency, complementation group 3 | NM_133658 | 9.3777  | 8.1876 | 1.1901 |
| 1422293_a_at | Kctd1         | potassium channel tetramerisation domain containing 1                                 | NM_134112 | 6.2005  | 5.0107 | 1.1898 |
| 1435551_at   | Fhod3         | formin homology 2 domain containing 3                                                 | BG066491  | 7.9192  | 6.7300 | 1.1892 |
| 1434302_at   |               |                                                                                       | AV307311  | 8.5361  | 7.3483 | 1.1878 |
| 1449107_at   | Nudt4         | nudix (nucleoside diphosphate linked moiety X)-type motif 4                           | NM_027722 | 10.0899 | 8.9035 | 1.1864 |
| 1436583_at   | Dscc1         | defective in sister chromatid cohesion 1 homolog (S. cerevisiae)                      | BB478218  | 6.5967  | 5.4108 | 1.1859 |
| 1426689_s_at | Sdha          | succinate dehydrogenase complex, subunit A, flavoprotein (Fp)                         | BF585357  | 10.6111 | 9.4253 | 1.1858 |
| 1421785_at   | Uevld         | UEV and lactate/malate dehydrogenase domains                                          | NM_016855 | 5.8141  | 4.6285 | 1.1856 |
| 1456502_at   | Dyrk2         | dual-specificity tyrosine-(Y)-phosphorylation regulated kinase 2                      | AI326418  | 7.4247  | 6.2392 | 1.1855 |
| 1443500_at   |               |                                                                                       | BB098429  | 6.2879  | 5.1030 | 1.1849 |
| 1442058_s_at | Psmc3ip       | proteasome (prosome, macropain) 26S subunit, ATPase 3, interacting protein            | BE687992  | 9.6200  | 8.4355 | 1.1845 |
| 1419687_at   | Macro1        | MACRO domain containing 1                                                             | NM_134147 | 7.8968  | 6.7134 | 1.1834 |
| 1435926_at   | Chml          | choroideremia-like                                                                    | BB529627  | 7.3238  | 6.1404 | 1.1834 |
| 1426242_at   | Polr2a        | polymerase (RNA) II (DNA directed) polypeptide A                                      | U37500    | 9.2335  | 8.0510 | 1.1825 |
| 1448272_at   | Btg2          | B cell translocation gene 2, anti-proliferative                                       | NM_007570 | 6.8186  | 5.6366 | 1.1820 |
| 1431332_a_at | Terf1         | telomeric repeat binding factor 1                                                     | BG142548  | 8.4743  | 7.2935 | 1.1808 |
| 1444036_at   |               |                                                                                       | BB325197  | 5.3765  | 4.1961 | 1.1804 |
| 1433907_at   | Pknox2        | Pbx/knotted 1 homeobox 2                                                              | BQ175824  | 6.3161  | 5.1357 | 1.1803 |
| 1431704_a_at | Ralgps2       | Ral GEF with PH domain and SH3 binding motif 2                                        | AK018622  | 6.7928  | 5.6133 | 1.1795 |
| 1426110_a_at | Lpar1         | lysophosphatidic acid receptor 1                                                      | U48235    | 5.4108  | 4.2314 | 1.1794 |
| 1453639_s_at | Ccdc163       | coiled-coil domain containing 163                                                     | AK016995  | 6.0989  | 4.9195 | 1.1794 |
| 1452322_a_at | Brwd1         | bromodomain and WD repeat domain containing 1                                         | BM230348  | 6.6564  | 5.4771 | 1.1793 |
| 1428399_a_at | Armc9         | armadillo repeat containing 9                                                         | AK017564  | 6.2760  | 5.0970 | 1.1791 |
| 1425271_at   | Psmc3ip       | proteasome (prosome, macropain) 26S subunit, ATPase 3, interacting protein            | AB000121  | 9.8098  | 8.6313 | 1.1785 |
| 1417382_at   | Entpd5        | ectonucleoside triphosphate diphosphohydrolase 5                                      | NM_007647 | 6.8186  | 5.6402 | 1.1783 |
| 1451929_a_at | Vrk2          | vaccinia related kinase 2                                                             | BC013520  | 8.6090  | 7.4308 | 1.1782 |
| 1432177_a_at | Mnat1         | menage a trois 1                                                                      | AK011833  | 9.3336  | 8.1559 | 1.1777 |
| 1454710_at   | Spink2        | serine peptidase inhibitor, Kazal type 2                                              | BE456717  | 6.8313  | 5.6547 | 1.1766 |
| 1438003_at   | Papd7         | PAP associated domain containing 7                                                    | BB324894  | 7.6662  | 6.4898 | 1.1764 |
| 1435132_at   | Disp1         | dispatched homolog 1 (Drosophila)                                                     | AI505698  | 8.0574  | 6.8811 | 1.1762 |
| 1428418_s_at | Fam164a       | family with sequence similarity 164, member A                                         | BE198251  | 9.5835  | 8.4074 | 1.1761 |
| 1416399_a_at | Hmox2         | heme oxygenase (decycling) 2                                                          | NM_010443 | 10.1483 | 8.9731 | 1.1752 |

|              |               |                                                                                                |           |         |         |        |
|--------------|---------------|------------------------------------------------------------------------------------------------|-----------|---------|---------|--------|
| 1451385_at   | Fam162a       | family with sequence similarity 162, member A                                                  | BC010826  | 11.8451 | 10.6705 | 1.1746 |
| 1453759_at   |               |                                                                                                | AK019597  | 6.6941  | 5.5196  | 1.1744 |
| 1437460_x_at | Rin1          | Ras and Rab interactor 1                                                                       | BB264363  | 7.0755  | 5.9012  | 1.1742 |
| 1456652_at   | Dtl           | denticleless homolog (Drosophila)                                                              | BB293562  | 8.2135  | 7.0394  | 1.1742 |
| 1426575_at   | Sgms1         | sphingomyelin synthase 1                                                                       | BE629162  | 6.4409  | 5.2678  | 1.1731 |
| 1456236_s_at | Commd10       | COMM domain containing 10                                                                      | AU019438  | 8.8586  | 7.6856  | 1.1731 |
| 1419385_a_at | Ubqln1        | ubiquilin 1                                                                                    | NM_026842 | 9.0299  | 7.8572  | 1.1727 |
| 1449038_at   | Hsd11b1       | hydroxysteroid 11-beta dehydrogenase 1                                                         | NM_008288 | 6.5881  | 5.4161  | 1.1720 |
| 1435836_at   | Pdk1          | pyruvate dehydrogenase kinase, isoenzyme 1                                                     | BB553369  | 8.9078  | 7.7367  | 1.1711 |
| 1426720_at   | Apbb2         | amyloid beta (A4) precursor protein-binding, family B, member 2                                | BG067463  | 5.1383  | 3.9673  | 1.1710 |
| 1424699_at   | Ccdc136       | coiled-coil domain containing 136                                                              | BC006583  | 8.5901  | 7.4196  | 1.1705 |
| 1419568_at   | Mapk1         | mitogen-activated protein kinase 1                                                             | NM_011949 | 10.1867 | 9.0165  | 1.1702 |
| 1424629_at   | Brca1         | breast cancer 1                                                                                | U31625    | 10.2335 | 9.0638  | 1.1697 |
| 1426184_a_at | Pcd6ip        | programmed cell death 6 interacting protein                                                    | AJ005074  | 6.9835  | 5.8142  | 1.1693 |
| 1431305_at   | Mcoln1        | mucolin 1                                                                                      | AA874645  | 5.8252  | 4.6563  | 1.1690 |
| 1456759_at   | Lrrc4c        | leucine rich repeat containing 4C                                                              | BE953888  | 5.1383  | 3.9701  | 1.1682 |
| 1439066_at   | Angpt1        | angiopoietin 1                                                                                 | BB453314  | 6.7491  | 5.5812  | 1.1679 |
| 1441926_x_at | Tmie          | transmembrane inner ear                                                                        | BB326566  | 5.7245  | 4.5566  | 1.1679 |
| 1418160_at   | Mkln3         | makorin, ring finger protein, 3                                                                | NM_011746 | 5.5258  | 4.3588  | 1.1671 |
| 1441274_at   |               |                                                                                                | BB283974  | 7.0299  | 5.8632  | 1.1668 |
| 1422662_at   | Lgals8        | lectin, galactose binding, soluble 8                                                           | AI987967  | 9.4619  | 8.2953  | 1.1666 |
| 1435030_at   | Upf2          | UPF2 regulator of nonsense transcripts homolog (yeast)                                         | AA538567  | 9.2230  | 8.0564  | 1.1666 |
| 1425572_a_at | Asap1         | ArfGAP with SH3 domain, ankyrin repeat and PH domain1                                          | BE943736  | 8.8464  | 7.6804  | 1.1660 |
| 1451739_at   | Klf5          | Kruppel-like factor 5                                                                          | BC006646  | 6.3997  | 5.2348  | 1.1650 |
| 1457214_at   |               |                                                                                                | BM293522  | 5.2306  | 4.0658  | 1.1649 |
| 1417046_at   | Nprl2         | nitrogen permease regulator-like 2                                                             | NM_018879 | 8.4206  | 7.2562  | 1.1644 |
| 1424996_at   | Cflar         | CASP8 and FADD-like apoptosis regulator                                                        | BC023121  | 9.1730  | 8.0086  | 1.1644 |
| 1448510_at   | Efna1         | ephrin A1                                                                                      | D38146    | 7.9260  | 6.7621  | 1.1639 |
| 1429390_at   | Acpl2         | acid phosphatase-like 2                                                                        | BB183525  | 8.4383  | 7.2750  | 1.1633 |
| 1456577_x_at | Pitrm1        | pitrilysin metallopeptidase 1                                                                  | AV304625  | 8.2802  | 7.1176  | 1.1625 |
| 1434627_at   | Nrf1          | nuclear respiratory factor 1                                                                   | BM221378  | 8.4736  | 7.3117  | 1.1618 |
| 1434683_at   |               |                                                                                                | BQ177031  | 5.9081  | 4.7470  | 1.1611 |
| 1422878_at   | Syt12         | synaptotagmin XII                                                                              | NM_134164 | 6.7665  | 5.6073  | 1.1592 |
| 1437296_at   | Pkn2          | protein kinase N2                                                                              | AI507382  | 8.9461  | 7.7871  | 1.1590 |
| 1455817_x_at | Zxdb          | zinc finger, X-linked, duplicated B                                                            | AI661029  | 7.9634  | 6.8057  | 1.1577 |
| 1435274_at   |               |                                                                                                | BQ175341  | 8.5231  | 7.3656  | 1.1574 |
| 1425195_a_at |               |                                                                                                | AF356876  | 9.9524  | 8.7966  | 1.1558 |
| 1416895_at   | Efna1         | ephrin A1                                                                                      | D38146    | 8.5007  | 7.3450  | 1.1557 |
| 1452094_at   | P4ha1         | procollagen-proline, 2-oxoglutarate 4-dioxygenase (proline 4-hydroxylase), alpha 1 polypeptide | AI314028  | 10.7852 | 9.6299  | 1.1553 |
| 1423655_a_at | Ctc1          | CTS telomere maintenance complex component 1                                                   | BC014687  | 8.5027  | 7.3475  | 1.1552 |
| 1450333_a_at | Gata2         | GATA binding protein 2                                                                         | NM_008090 | 7.0967  | 5.9416  | 1.1551 |
| 1456189_x_at | Ltbp3         | latent transforming growth factor beta binding protein 3                                       | BB173900  | 6.0270  | 4.8719  | 1.1551 |
| 1441089_at   | Eif2c3        | eukaryotic translation initiation factor 2C, 3                                                 | BB205493  | 6.3069  | 5.1519  | 1.1550 |
| 1453345_at   | Nipal1        | NIPA-like domain containing 1                                                                  | AK014427  | 6.1198  | 4.9657  | 1.1541 |
| 1436725_at   | E130306D19Rik | RIKEN cDNA E130306D19 gene                                                                     | BM226118  | 8.1710  | 7.0173  | 1.1537 |
| 1450044_at   | Fzd7          | frizzled homolog 7 (Drosophila)                                                                | NM_008057 | 9.5560  | 8.4032  | 1.1528 |
| 1441108_at   |               |                                                                                                | AU040876  | 6.5291  | 5.3765  | 1.1525 |
| 1450651_at   | Myo10         | myosin X                                                                                       | AV297945  | 5.0544  | 3.9024  | 1.1520 |
| 1423434_at   | Tead1         | TEA domain family member 1                                                                     | BB546942  | 5.9357  | 4.7837  | 1.1520 |
| 1451936_a_at | Txnrd2        | thioredoxin reductase 2                                                                        | BC013688  | 6.4574  | 5.3054  | 1.1520 |
| 1444021_at   |               |                                                                                                | AW741388  | 7.0394  | 5.8877  | 1.1516 |
| 1445843_at   | Chd2          | chromodomain helicase DNA binding protein 2                                                    | BE199465  | 7.4502  | 6.2990  | 1.1511 |
| 1453055_at   | Sema6d        | sema domain, transmembrane domain (TM), and cytoplasmic domain, (semaphorin) 6D                | BB462688  | 5.4654  | 4.3150  | 1.1504 |
| 1455740_at   | Hnrnpa1       | heterogeneous nuclear ribonucleoprotein A1                                                     | BE685966  | 8.4712  | 7.3208  | 1.1504 |
| 1426002_a_at | Cdc7          | cell division cycle 7 (S. cerevisiae)                                                          | AB018574  | 9.8810  | 8.7309  | 1.1501 |
| 1455702_at   | Dcaf5         | DDB1 and CUL4 associated factor 5                                                              | BM234499  | 6.0270  | 4.8770  | 1.1500 |
| 1418943_at   | B230120H23Rik | RIKEN cDNA B230120H23 gene                                                                     | NM_023057 | 6.0779  | 4.9285  | 1.1493 |
| 1436380_at   | Cdc42bpa      | CDC42 binding protein kinase alpha                                                             | BG518726  | 7.6064  | 6.4574  | 1.1490 |
| 1447917_x_at |               |                                                                                                | BB303908  | 9.9017  | 8.7545  | 1.1472 |
| 1419298_at   | Pon3          | paraoxonase 3                                                                                  | NM_008897 | 7.5278  | 6.3809  | 1.1469 |

|              |               |                                                                               |           |         |         |        |
|--------------|---------------|-------------------------------------------------------------------------------|-----------|---------|---------|--------|
| 1437395_at   | Zcchc11       | zinc finger, CCHC domain containing 11                                        | BE370775  | 9.5413  | 8.3946  | 1.1467 |
| 1422438_at   | Ephx1         | epoxide hydrolase 1, microsomal                                               | NM_010145 | 9.4377  | 8.2914  | 1.1463 |
| 1417785_at   | Pla1a         | phospholipase A1 member A                                                     | NM_134102 | 6.3376  | 5.1918  | 1.1458 |
| 1439964_at   |               |                                                                               | AA958820  | 7.4224  | 6.2766  | 1.1458 |
| 1424940_s_at | BC022687      | cDNA sequence BC022687                                                        | BC022687  | 7.4964  | 6.3509  | 1.1454 |
| 1428707_at   | Ptms          | parathyrosin                                                                  | AK011360  | 10.0668 | 8.9215  | 1.1453 |
| 1423682_a_at | Cdca4         | cell division cycle associated 4                                              | AF322238  | 10.5631 | 9.4180  | 1.1450 |
| 1446150_at   |               |                                                                               | BB373481  | 5.0544  | 3.9095  | 1.1449 |
| 1454663_at   | Eif5          | eukaryotic translation initiation factor 5                                    | BQ176989  | 10.3691 | 9.2247  | 1.1444 |
| 1451806_at   | Fnbp1         | formin binding protein 1                                                      | BC003867  | 5.8650  | 4.7207  | 1.1443 |
| 1457454_at   |               |                                                                               | BG071065  | 5.9357  | 4.7915  | 1.1442 |
| 1451601_a_at | Spns2         | spinster homolog 2                                                            | BC025823  | 5.1796  | 4.0354  | 1.1441 |
| 1438690_at   | Tyms          | thymidylate synthase                                                          | BM068975  | 7.0557  | 5.9119  | 1.1438 |
| 1429844_at   | Upk3bl        | uroplakin 3B-like                                                             | AK009780  | 5.7562  | 4.6127  | 1.1435 |
| 1429949_at   | 6530415H11Rik | RIKEN cDNA 6530415H11 gene                                                    | AK018340  | 6.7353  | 5.5920  | 1.1433 |
| 1425319_s_at | Snrnp48       | small nuclear ribonucleoprotein 48 (U11/U12)                                  | BC021443  | 9.4417  | 8.2986  | 1.1430 |
| 1451053_a_at | Mdm1          | transformed mouse 3T3 cell double minute 1                                    | AV313203  | 7.2207  | 6.0777  | 1.1430 |
| 1454558_at   | 5430416B10Rik | RIKEN cDNA 5430416B10 gene                                                    | AK017313  | 5.1129  | 3.9701  | 1.1428 |
| 1450782_at   | Wnt4          | wingless-related MMTV integration site 4                                      | NM_009523 | 6.7774  | 5.6352  | 1.1422 |
| 1416942_at   | Erap1         | endoplasmic reticulum aminopeptidase 1                                        | NM_030711 | 7.9747  | 6.8325  | 1.1421 |
| 1425012_at   | Gng5          | guanine nucleotide binding protein (G protein), gamma 5                       | BC010725  | 5.5002  | 4.3588  | 1.1414 |
| 1436574_at   | Znf41-ps      | ZNF41, pseudogene                                                             | BQ033755  | 5.1786  | 4.0372  | 1.1414 |
| 1458664_at   | A430103D13Rik | RIKEN cDNA A430103D13 gene                                                    | BB750424  | 5.1786  | 4.0372  | 1.1414 |
| 1458373_at   | Gen1          | Gen homolog 1, endonuclease (Drosophila)                                      | BM218112  | 5.5812  | 4.4400  | 1.1412 |
| 1435866_s_at | Hist3h2a      | histone cluster 3, H2a                                                        | AV297651  | 7.7050  | 6.5650  | 1.1399 |
| 1432054_at   | Golga1        | golgi autoantigen, golgin subfamily a, 1                                      | AK008972  | 5.9119  | 4.7725  | 1.1394 |
| 1457293_at   | Zbtb4         | zinc finger and BTB domain containing 4                                       | BF714580  | 6.4791  | 5.3414  | 1.1377 |
| 1440882_at   | Lrp8          | low density lipoprotein receptor-related protein 8, apolipoprotein e receptor | BB750940  | 9.8120  | 8.6743  | 1.1376 |
| 1419316_s_at | Gnb1l         | guanine nucleotide binding protein (G protein), beta polypeptide 1-like       | NM_023120 | 7.4930  | 6.3554  | 1.1376 |
| 1435472_at   | Kremen1       | kringle containing transmembrane protein 1                                    | BG069617  | 7.0920  | 5.9544  | 1.1375 |
| 1439552_at   | Trio          | triple functional domain (PTPRF interacting)                                  | BE985618  | 5.6022  | 4.4648  | 1.1374 |
| 1444710_at   | Gm19589       | predicted gene, 19589                                                         | BB818892  | 5.3054  | 4.1689  | 1.1365 |
| 1440943_at   | Rab16         | RAB, member of RAS oncogene family-like 6                                     | BB362902  | 7.1072  | 5.9710  | 1.1362 |
| 1423465_at   | Frrs1         | ferric-chelate reductase 1                                                    | BB032852  | 10.2155 | 9.0816  | 1.1339 |
| 1451386_at   | Blvrb         | biliverdin reductase B (flavin reductase (NADPH))                             | BC027279  | 9.6955  | 8.5618  | 1.1337 |
| 1451724_at   | Ankmy2        | ankyrin repeat and MYND domain containing 2                                   | BC024959  | 7.5112  | 6.3781  | 1.1330 |
| 1421771_a_at | Ipp           | IAP promoted placental gene                                                   | NM_008389 | 7.6597  | 6.5268  | 1.1329 |
| 1431772_a_at | Itn2          | intersectin 2                                                                 | AK015445  | 7.6597  | 6.5268  | 1.1329 |
| 1448851_a_at | Dnajc5        | DnaJ (Hsp40) homolog, subfamily C, member 5                                   | AK012029  | 7.1598  | 6.0270  | 1.1328 |
| 1423134_at   | Rilpl2        | Rab interacting lysosomal protein-like 2                                      | BG076340  | 10.1833 | 9.0513  | 1.1320 |
| 1442453_at   | Fcho2         | FCH domain only 2                                                             | BM224404  | 8.3004  | 7.1687  | 1.1317 |
| 1431440_at   | Pole2         | polymerase (DNA directed), epsilon 2 (p59 subunit)                            | AK011941  | 5.1383  | 4.0068  | 1.1315 |
| 1440455_at   | Camk2n1       | calcium/calmodulin-dependent protein kinase II inhibitor 1                    | AI848599  | 6.2831  | 5.1519  | 1.1312 |
| 1438900_at   | Sacm1l        | SAC1 (suppressor of actin mutations 1, homolog)-like (S. cerevisiae)          | BB141248  | 5.5405  | 4.4096  | 1.1308 |
| 1421096_at   | Trpc1         | transient receptor potential cation channel, subfamily C, member 1            | BB817939  | 8.3258  | 7.1952  | 1.1306 |
| 1448760_at   | Zfp68         | zinc finger protein 68                                                        | NM_013844 | 9.1920  | 8.0618  | 1.1302 |
| 1450862_at   | Rad54l        | RAD54 like (S. cerevisiae)                                                    | AV310220  | 9.4724  | 8.3436  | 1.1287 |
| 1423808_at   | Wrap53        | WD repeat containing, antisense to TP53                                       | BC021790  | 7.5015  | 6.3729  | 1.1286 |
| 1460227_at   | Timp1         | tissue inhibitor of metalloproteinase 1                                       | BC008107  | 12.2689 | 11.1405 | 1.1284 |
| 1435634_at   | Pcmt1         | protein-L-isoaspartate (D-aspartate) O-methyltransferase domain containing 1  | BB549335  | 8.8187  | 7.6903  | 1.1284 |
| 1455381_at   | Marf1         | meiosis arrest female 1                                                       | AV254721  | 9.6590  | 8.5309  | 1.1281 |
| 1443916_at   | 2900026A02Rik | RIKEN cDNA 2900026A02 gene                                                    | BB225811  | 5.9506  | 4.8229  | 1.1277 |
| 1433955_at   | Brwd1         | bromodomain and WD repeat domain containing 1                                 | BB467195  | 7.4828  | 6.3554  | 1.1275 |
| 1420766_at   | Socs7         | suppressor of cytokine signaling 7                                            | NM_138657 | 6.6421  | 5.5147  | 1.1273 |
| 1431131_s_at | A630007B06Rik | RIKEN cDNA A630007B06 gene                                                    | B1106826  | 8.0246  | 6.8973  | 1.1273 |
| 1453119_at   | Otud1         | OTU domain containing 1                                                       | BB530087  | 8.5945  | 7.4672  | 1.1272 |
| 1432850_at   | 5430434G16Rik | RIKEN cDNA 5430434G16 gene                                                    | AK017390  | 7.0861  | 5.9590  | 1.1271 |
| 1451924_a_at | Edn1          | endothelin 1                                                                  | D43775    | 6.3953  | 5.2685  | 1.1268 |
| 1432367_a_at | Ufd1l         | ubiquitin fusion degradation 1 like                                           | AK012543  | 8.9931  | 7.8670  | 1.1260 |

|              |               |                                                                              |           |         |         |        |
|--------------|---------------|------------------------------------------------------------------------------|-----------|---------|---------|--------|
| 1426554_a_at | Pgam1         | phosphoglycerate mutase 1                                                    | BI407347  | 11.6388 | 10.5129 | 1.1259 |
| 1421344_a_at | Jub           | ajuba                                                                        | NM_010590 | 10.0903 | 8.9645  | 1.1258 |
| 1442384_at   |               |                                                                              | BG065559  | 5.0333  | 3.9096  | 1.1237 |
| 1429298_at   | Ddah1         | dimethylarginine dimethylaminohydrolase 1                                    | BE283964  | 9.3852  | 8.2615  | 1.1237 |
| 1452606_at   | Mnd1          | meiotic nuclear divisions 1 homolog (S. cerevisiae)                          | BG070803  | 7.8984  | 6.7753  | 1.1231 |
| 1455112_at   | Aifm2         | apoptosis-inducing factor, mitochondrion-associated 2                        | BB772185  | 7.8309  | 6.7085  | 1.1224 |
| 1443603_at   |               |                                                                              | BB213784  | 5.1596  | 4.0372  | 1.1224 |
| 1443899_at   | 4922501C03Rik | RIKEN cDNA 4922501C03 gene                                                   | BM230782  | 7.4774  | 6.3551  | 1.1223 |
| 1425828_at   | Nkx6-1        | NK6 homeobox 1                                                               | AF357883  | 5.9521  | 4.8299  | 1.1222 |
| 1447852_x_at | Rilpl1        | Rab interacting lysosomal protein-like 1                                     | BB520487  | 8.8125  | 7.6903  | 1.1222 |
| 1452321_at   | Brwd1         | bromodomain and WD repeat domain containing 1                                | BM230348  | 6.9850  | 5.8632  | 1.1219 |
| 1434746_at   | Mga           | MAX gene associated                                                          | BG797579  | 7.9727  | 6.8511  | 1.1216 |
| 1433570_s_at | Naa35         | N(alpha)-acetyltransferase 35, NatC auxiliary subunit                        | BG083730  | 9.5841  | 8.4630  | 1.1211 |
| 1438012_at   | Ppm1l         | protein phosphatase 1 (formerly 2C)-like                                     | BB308836  | 8.1492  | 7.0284  | 1.1208 |
| 1432147_at   | 4930447F24Rik | RIKEN cDNA 4930447F24 gene                                                   | AK015404  | 6.4205  | 5.2998  | 1.1207 |
| 1448352_at   | Luzp1         | leucine zipper protein 1                                                     | BB705823  | 8.9265  | 7.8087  | 1.1178 |
| 1422462_at   | Ube2t         | ubiquitin-conjugating enzyme E2T (putative)                                  | NM_026024 | 9.7590  | 8.6422  | 1.1168 |
| 1426615_s_at | Ndr4          | N-myc downstream regulated gene 4                                            | AV006122  | 10.0050 | 8.8888  | 1.1162 |
| 1455281_at   | Wdr33         | WD repeat domain 33                                                          | BB520667  | 6.1437  | 5.0277  | 1.1160 |
| 1429083_at   | Agl           | amylase-1,6-galactosidase, 4-alpha-glucanotransferase                        | BB006088  | 8.1028  | 6.9870  | 1.1158 |
| 1417981_at   | Insig2        | insulin induced gene 2                                                       | AV257512  | 9.3690  | 8.2535  | 1.1155 |
| 1460559_at   | Kank2         | KN motif and ankyrin repeat domains 2                                        | BB038765  | 9.9488  | 8.8335  | 1.1153 |
| 1428085_at   | 1110057K04Rik | RIKEN cDNA 1110057K04 gene                                                   | AK004285  | 9.0109  | 7.8959  | 1.1149 |
| 1446272_at   | Cdk17         | cyclin-dependent kinase 17                                                   | BB200545  | 5.6139  | 4.4990  | 1.1149 |
| 1436196_at   | C030046G05    | uncharacterized protein C030046G05                                           | BE691546  | 7.4183  | 6.3035  | 1.1148 |
| 1416035_at   | Hif1a         | hypoxia inducible factor 1, alpha subunit                                    | BB269715  | 9.0029  | 7.8882  | 1.1147 |
| 1419803_s_at | Ccdc12        | coiled-coil domain containing 12                                             | C76605    | 10.1523 | 9.0377  | 1.1147 |
| 1424667_a_at | Cux1          | cut-like homeobox 1                                                          | BC014289  | 5.2835  | 4.1689  | 1.1146 |
| 1418533_s_at | Fzd2          | frizzled homolog 2 (Drosophila)                                              | BB371406  | 8.8975  | 7.7828  | 1.1146 |
| 1441617_at   | Med15         | mediator complex subunit 15                                                  | BB475089  | 5.8809  | 4.7663  | 1.1146 |
| 1455388_at   | Pcmt1         | protein-L-isoaspartate (D-aspartate) O-methyltransferase domain containing 1 | BB549335  | 9.2652  | 8.1508  | 1.1144 |
| 1424471_at   | Rapgef3       | Rap guanine nucleotide exchange factor (GEF)                                 | BC020532  | 9.1137  | 7.9993  | 1.1144 |
| 1443027_at   |               |                                                                              | BB667435  | 5.2831  | 4.1689  | 1.1142 |
| 1436354_at   | Dzip1l        | DAZ interacting protein 1-like                                               | BE992423  | 8.3510  | 7.2372  | 1.1138 |
| 1450890_a_at | Abi1          | abl-interactor 1                                                             | AW912678  | 10.2271 | 9.1134  | 1.1136 |
| 1436320_at   |               |                                                                              | W45978    | 10.1053 | 8.9923  | 1.1130 |
| 1425019_at   | Ubx2a         | UBX domain protein 2A                                                        | AV174556  | 8.5490  | 7.4364  | 1.1126 |
| 1449839_at   | Casp3         | caspase 3                                                                    | BG070529  | 10.5737 | 9.4612  | 1.1124 |
| 1421307_at   | Car13         | carbonic anhydrase 13                                                        | AK010166  | 7.9309  | 6.8186  | 1.1123 |
| 1422211_a_at | B3gnt3        | UDP-GlcNAc:betaGal beta-1,3-N-acetylglucosaminyltransferase 3                | AY037785  | 5.6689  | 4.5566  | 1.1123 |
| 1450957_a_at | Sqstm1        | sequestosome 1                                                               | BM232298  | 11.5065 | 10.3943 | 1.1123 |
| 1442834_at   |               |                                                                              | BG070476  | 5.8842  | 4.7725  | 1.1117 |
| 1425163_at   | Al661453      | expressed sequence Al661453                                                  | BC006605  | 6.3015  | 5.1918  | 1.1097 |
| 1418476_at   | Cr1f1         | cytokine receptor-like factor 1                                              | NM_018827 | 10.1851 | 9.0756  | 1.1095 |
| 1418581_a_at | Limk2         | LIM motif-containing protein kinase 2                                        | BE981766  | 7.9021  | 6.7928  | 1.1093 |
| 1424198_at   | Dlg5          | discs, large homolog 5 (Drosophila)                                          | BC021314  | 8.2498  | 7.1406  | 1.1092 |
| 1423804_a_at |               |                                                                              | BC004801  | 10.3014 | 9.1921  | 1.1092 |
| 1449061_a_at | Prim1         | DNA primase, p49 subunit                                                     | J04620    | 10.3576 | 9.2484  | 1.1091 |
| 1457827_at   | Arsj          | arylsulfatase J                                                              | BB084936  | 7.7674  | 6.6582  | 1.1091 |
| 1444693_at   |               |                                                                              | BG069383  | 5.5491  | 4.4400  | 1.1091 |
| 1453750_x_at | Pitpnc1       | phosphatidylinositol transfer protein, cytoplasmic 1                         | BI654600  | 6.1198  | 5.0107  | 1.1091 |
| 1427661_a_at | Tssc4         | tumor-suppressing subchromosomal transferable fragment 4                     | AJ279797  | 8.1681  | 7.0592  | 1.1089 |
| 1460293_at   | Ncs1          | neuronal calcium sensor 1                                                    | AU079041  | 5.8813  | 4.7725  | 1.1088 |
| 1444042_at   | Trip11        | thyroid hormone receptor interactor 11                                       | BM938758  | 5.0107  | 3.9024  | 1.1083 |
| 1430089_at   | 5830469G19Rik | RIKEN cDNA 5830469G19 gene                                                   | BB032195  | 7.6809  | 6.5730  | 1.1079 |
| 1448207_at   | Lasp1         | LIM and SH3 protein 1                                                        | BC010840  | 6.6275  | 5.5196  | 1.1079 |
| 1433479_at   | Ubr7          | ubiquitin protein ligase E3 component n-recognin 7 (putative)                | AV030071  | 7.2470  | 6.1399  | 1.1071 |
| 1431101_a_at | Srd5a1        | steroid 5 alpha-reductase 1                                                  | AK019597  | 7.9631  | 6.8561  | 1.1070 |
| 1423470_at   | Ptbp2         | polypyrimidine tract binding protein 2                                       | BB076855  | 10.5329 | 9.4274  | 1.1055 |

|              |               |                                                                    |           |         |         |        |
|--------------|---------------|--------------------------------------------------------------------|-----------|---------|---------|--------|
| 1452161_at   | Tiparp        | TCDD-inducible poly(ADP-ribose) polymerase                         | BB707122  | 10.0739 | 8.9693  | 1.1047 |
| 1457812_at   | Trp53bp1      | transformation related protein 53 binding protein 1                | BB119893  | 5.7377  | 4.6332  | 1.1045 |
| 1422612_at   | Hk2           | hexokinase 2                                                       | NM_013820 | 10.1447 | 9.0403  | 1.1045 |
| 1417662_at   | Elk3          | ELK3, member of ETS oncogene family                                | BC005686  | 6.8186  | 5.7142  | 1.1044 |
| 1446228_at   | Ermp1         | endoplasmic reticulum metalloproteinase 1                          | BB222614  | 6.2392  | 5.1348  | 1.1044 |
| 1434025_at   |               |                                                                    | BG069607  | 9.5386  | 8.4348  | 1.1038 |
| 1435575_at   | Kntc1         | kinetochore associated 1                                           | AW536884  | 10.0240 | 8.9215  | 1.1026 |
| 1443491_at   |               |                                                                    | BG802688  | 5.2940  | 4.1923  | 1.1017 |
| 1452581_at   | Rprd1b        | regulation of nuclear pre-mRNA domain containing 1B                | BB304715  | 7.2652  | 6.1639  | 1.1013 |
| 1452662_a_at | Eif2s1        | eukaryotic translation initiation factor 2, subunit 1 alpha        | BQ175028  | 12.1332 | 11.0326 | 1.1006 |
| 1435330_at   | Pyhin1        | pyrin and HIN domain family, member 1                              | BM241008  | 5.3969  | 4.2966  | 1.1002 |
| 1429092_at   | Vkorc111      | vitamin K epoxide reductase complex, subunit 1-like 1              | AK009497  | 9.2712  | 8.1712  | 1.0999 |
| 1453988_a_at | Ide           | insulin degrading enzyme                                           | AK014703  | 6.5424  | 5.4428  | 1.0996 |
| 1428824_at   | 2310003C23Rik | RIKEN cDNA 2310003C23 gene                                         | AK009106  | 8.4010  | 7.3026  | 1.0984 |
| 1424060_at   | Neil3         | nei like 3 (E. coli)                                               | BC024921  | 7.8060  | 6.7079  | 1.0980 |
| 1425991_a_at | Kank2         | KN motif and ankyrin repeat domains 2                              | BC010245  | 8.1624  | 7.0651  | 1.0973 |
| 1456483_at   | Zfp9          | zinc finger protein 9                                              | BB008902  | 9.0192  | 7.9221  | 1.0972 |
| 1419087_s_at | Sf3a1         | splicing factor 3a, subunit 1                                      | BB031756  | 7.1746  | 6.0777  | 1.0969 |
| 1419506_at   | Ggps1         | geranylgeranyl diphosphate synthase 1                              | NM_010282 | 8.9155  | 7.8194  | 1.0961 |
| 1460338_a_at | Crlf3         | cytokine receptor-like factor 3                                    | BB161253  | 10.1441 | 9.0486  | 1.0955 |
| 1429196_at   | Rabgap1l      | RAB GTPase activating protein 1-like                               | BB431654  | 6.4822  | 5.3872  | 1.0950 |
| 1435009_at   | Slc9a6        | solute carrier family 9 (sodium/hydrogen exchanger), member 6      | BB611738  | 7.9134  | 6.8186  | 1.0949 |
| 1430341_at   | Nudt5         | nudix (nucleoside diphosphate linked moiety X)-type motif 5        | BE200248  | 6.8599  | 5.7651  | 1.0949 |
| 1428171_at   | Prpf39        | PRP39 pre-mRNA processing factor 39 homolog (yeast)                | BB460975  | 9.1832  | 8.0886  | 1.0946 |
| 1431708_a_at | Tia1          | cytotoxic granule-associated RNA binding protein 1                 | AK009502  | 7.5840  | 6.4898  | 1.0942 |
| 1435548_at   | Mrs2          | MRS2 magnesium homeostasis factor homolog (S. cerevisiae)          | BB015377  | 7.8156  | 6.7217  | 1.0939 |
| 1419281_a_at | Zfp259        | zinc finger protein 259                                            | BC021397  | 9.6339  | 8.5401  | 1.0938 |
| 1435492_at   | Socs6         | suppressor of cytokine signaling 6                                 | BG075016  | 8.3273  | 7.2335  | 1.0937 |
| 1418534_at   | Fzd2          | frizzled homolog 2 (Drosophila)                                    | BB371406  | 7.1176  | 6.0244  | 1.0932 |
| 1417542_at   | Rps6ka2       | ribosomal protein S6 kinase, polypeptide 2                         | BB737182  | 8.7241  | 7.6309  | 1.0931 |
| 1429510_at   | 2810410L24Rik | RIKEN cDNA 2810410L24 gene                                         | AK013071  | 6.3981  | 5.3054  | 1.0927 |
| 1418404_at   | Rad9          | RAD9 homolog (S. pombe)                                            | NM_011237 | 8.8099  | 7.7180  | 1.0919 |
| 1448655_at   | Lrp1          | low density lipoprotein receptor-related protein 1                 | NM_008512 | 8.4032  | 7.3117  | 1.0914 |
| 1422893_at   | Sfmbt1        | Scm-like with four mbt domains 1                                   | AV214764  | 6.2831  | 5.1918  | 1.0913 |
| 1430165_at   | Stk17b        | serine/threonine kinase 17b (apoptosis-inducing)                   | AI661948  | 6.2831  | 5.1918  | 1.0913 |
| 1423538_at   | Ntan1         | N-terminal Asn amidase                                             | BB223798  | 9.7237  | 8.6325  | 1.0912 |
| 1416534_at   | Dpf2          | D4, zinc and double PHD fingers family 2                           | NM_011262 | 9.7027  | 8.6118  | 1.0909 |
| 1439794_at   | Ntn4          | netrin 4                                                           | BQ086474  | 8.9929  | 7.9021  | 1.0908 |
| 1437152_at   | Mex3b         | mex3 homolog B (C. elegans)                                        | BG072837  | 6.8313  | 5.7407  | 1.0906 |
| 1443231_at   |               |                                                                    | BG064470  | 5.7574  | 4.6674  | 1.0899 |
| 1442083_at   | Rsrc2         | arginine/serine-rich coiled-coil 2                                 | BB036922  | 8.3541  | 7.2658  | 1.0882 |
| 1427094_at   | Pole2         | polymerase (DNA directed), epsilon 2 (p59 subunit)                 | AF036898  | 10.2139 | 9.1264  | 1.0875 |
| 1450855_at   | Arvcf         | armadillo repeat gene deleted in velo-cardio-facial syndrome       | BE947943  | 6.5424  | 5.4552  | 1.0872 |
| 1426436_at   | Tmem159       | transmembrane protein 159                                          | BG066131  | 6.3029  | 5.2160  | 1.0869 |
| 1436854_at   | Trpc2         | transient receptor potential cation channel, subfamily C, member 2 | AV284133  | 6.3554  | 5.2685  | 1.0869 |
| 1416858_a_at | Fkbp3         | FK506 binding protein 3                                            | NM_013902 | 11.3996 | 10.3132 | 1.0864 |
| 1445322_x_at |               |                                                                    | BG063377  | 9.0081  | 7.9221  | 1.0860 |
| 1430594_at   | Rab11fip1     | RAB11 family interacting protein 1 (class I)                       | BB529383  | 5.5845  | 4.4990  | 1.0855 |
| 1453531_at   | Zfp248        | zinc finger protein 248                                            | AK012874  | 6.2371  | 5.1519  | 1.0852 |
| 1438122_at   | 2900006K08Rik | RIKEN cDNA 2900006K08 gene                                         | AV278574  | 5.0544  | 3.9701  | 1.0843 |
| 1449043_at   | Naga          | N-acetyl galactosaminidase, alpha                                  | BC021631  | 9.4115  | 8.3273  | 1.0843 |
| 1453190_at   | Usp19         | ubiquitin specific peptidase 19                                    | AK018431  | 5.6970  | 4.6127  | 1.0842 |
| 1434841_at   | Ino80d        | INO80 complex subunit D                                            | AI117751  | 8.6350  | 7.5511  | 1.0839 |
| 1417471_s_at | D1Ert622e     | DNA segment, Chr 1, ERATO Doi 622, expressed                       | NM_133825 | 8.2785  | 7.1952  | 1.0833 |
| 1426223_at   | Ttc39c        | tetratricopeptide repeat domain 39C                                | BC020021  | 8.7501  | 7.6668  | 1.0833 |
| 1417612_at   | Ier5          | immediate early response 5                                         | BF147705  | 9.1696  | 8.0864  | 1.0832 |

|              |               |                                                                     |           |         |         |        |
|--------------|---------------|---------------------------------------------------------------------|-----------|---------|---------|--------|
| 1415795_at   | Spin1         | spindlin 1                                                          | BM228780  | 7.4731  | 6.3902  | 1.0830 |
| 1418794_at   | Cds2          | CDP-diacylglycerol synthase (phosphatidate cytidyltransferase) 2    | BB487604  | 7.6710  | 6.5881  | 1.0829 |
| 1419216_at   | Azi1          | 5-azacytidine induced gene 1                                        | NM_009734 | 8.3130  | 7.2301  | 1.0829 |
| 1455997_a_at | Uqcrb         | ubiquinol-cytochrome c reductase binding protein                    | AV214853  | 13.0463 | 11.9635 | 1.0828 |
| 1454701_at   | 4930503L19Rik | RIKEN cDNA 4930503L19 gene                                          | AI450962  | 7.9263  | 6.8439  | 1.0824 |
| 1448621_a_at | Smpd1         | sphingomyelin phosphodiesterase 1, acid lysosomal                   | NM_011421 | 9.5164  | 8.4341  | 1.0823 |
| 1429423_at   | 4930518I15Rik | RIKEN cDNA 4930518I15 gene                                          | BB484739  | 5.5812  | 4.4990  | 1.0822 |
| 1456761_at   | D630030B22Rik | RIKEN cDNA D630030B22 gene                                          | BB500664  | 5.1191  | 4.0372  | 1.0820 |
| 1439180_at   | Ino80d        | INO80 complex subunit D                                             | BE197105  | 8.0386  | 6.9566  | 1.0820 |
| 1423603_at   | Zfp1          | zinc finger protein, multitype 1                                    | AA014267  | 5.6110  | 4.5293  | 1.0817 |
| 1447096_at   |               |                                                                     | AU042527  | 5.4396  | 4.3588  | 1.0808 |
| 1423999_at   | Abl1          | c-abl oncogene 1, non-receptor tyrosine kinase                      | J02995    | 9.3524  | 8.2726  | 1.0799 |
| 1455239_at   | 6330512M04Rik | RIKEN cDNA 6330512M04 gene                                          | BM116861  | 5.8517  | 4.7725  | 1.0792 |
| 1436714_at   | Lpp           | LIM domain containing preferred translocation partner in lipoma     | BB297498  | 9.3732  | 8.2940  | 1.0792 |
| 1420081_s_at | D2Erd750e     | DNA segment, Chr 2, ERATO Doi 750, expressed                        | AU019491  | 10.5642 | 9.4850  | 1.0792 |
| 1417244_a_at | Irf7          | interferon regulatory factor 7                                      | NM_016850 | 9.0722  | 7.9936  | 1.0786 |
| 1442878_at   | Prdx6         | peroxiredoxin 6                                                     | AW319648  | 6.6275  | 5.5492  | 1.0783 |
| 1425043_s_at | Ccdc163       | coiled-coil domain containing 163                                   | BC022733  | 6.7217  | 5.6435  | 1.0782 |
| 1449556_at   |               |                                                                     | NM_010398 | 9.5916  | 8.5142  | 1.0774 |
| 1415727_at   | Apoa1bp       | apolipoprotein A-I binding protein                                  | AV017766  | 11.3124 | 10.2359 | 1.0765 |
| 1435349_at   | Nrp2          | neuropilin 2                                                        | BB752129  | 10.5577 | 9.4815  | 1.0761 |
| 1436352_at   | Cep78         | centrosomal protein 78                                              | BF226994  | 6.4867  | 5.4108  | 1.0759 |
| 1452160_at   | Tiparp        | TCDD-inducible poly(ADP-ribose) polymerase                          | BB707122  | 10.8459 | 9.7702  | 1.0757 |
| 1431375_s_at | Parva         | parvin, alpha                                                       | BI690209  | 9.3613  | 8.2856  | 1.0757 |
| 1430448_at   | 6720418B01Rik | RIKEN cDNA 6720418B01 gene                                          | BB392953  | 5.5746  | 4.4990  | 1.0756 |
| 1445881_at   | 2310035P21Rik | RIKEN cDNA 2310035P21 gene                                          | BG230003  | 6.4843  | 5.4088  | 1.0755 |
| 1449901_a_at | Map3k6        | mitogen-activated protein kinase kinase kinase 6                    | NM_016693 | 7.3768  | 6.3015  | 1.0754 |
| 1418151_at   | Mttr4         | myotubularin related protein 4                                      | BQ032797  | 8.2236  | 7.1485  | 1.0751 |
| 1429852_at   | Ccdc57        | coiled-coil domain containing 57                                    | AK017054  | 5.1786  | 4.1035  | 1.0751 |
| 1438755_at   | C80068        | expressed sequence C80068                                           | BB327213  | 5.4443  | 4.3692  | 1.0751 |
| 1436890_at   | Uap111        | UDP-N-acetylglucosamine pyrophosphorylase 1-like 1                  | BG963358  | 10.3579 | 9.2828  | 1.0751 |
| 1428395_at   | Smurf1        | SMAD specific E3 ubiquitin protein ligase 1                         | BB832916  | 7.9379  | 6.8634  | 1.0745 |
| 1460733_at   | Unc119b       | unc-119 homolog B (C. elegans)                                      | BB390422  | 9.5386  | 8.4650  | 1.0736 |
| 1449579_at   | Sh3yl1        | Sh3 domain YSC-like 1                                               | NM_013709 | 6.7703  | 5.6970  | 1.0733 |
| 1442119_at   | AI449212      | expressed sequence AI449212                                         | AA175822  | 6.4141  | 5.3414  | 1.0727 |
| 1435031_at   | Tmem120a      | transmembrane protein 120A                                          | AV069499  | 9.4344  | 8.3621  | 1.0723 |
| 1417348_at   | 2310039H08Rik | RIKEN cDNA 2310039H08 gene                                          | NM_025966 | 10.0515 | 8.9799  | 1.0716 |
| 1441017_at   | Zcchc14       | zinc finger, CCHC domain containing 14                              | BB336452  | 7.8900  | 6.8186  | 1.0714 |
| 1430974_a_at | Senp7         | SUMO1/sentrin specific peptidase 7                                  | AK020068  | 6.3015  | 5.2306  | 1.0709 |
| 1419449_a_at | Gnai2         | guanine nucleotide binding protein (G protein), alpha inhibiting 2  | NM_008138 | 11.1363 | 10.0657 | 1.0706 |
| 1451526_at   | Arhgap12      | Rho GTPase activating protein 12                                    | BG064038  | 8.2552  | 7.1847  | 1.0705 |
| 1435754_at   | Zyg11b        | zyg-11 homolog B (C. elegans)                                       | BQ180736  | 9.3870  | 8.3169  | 1.0701 |
| 1423492_at   | Mrpl45        | mitochondrial ribosomal protein L45                                 | C79823    | 10.5861 | 9.5161  | 1.0699 |
| 1430985_at   | 1810027O10Rik | RIKEN cDNA 1810027O10 gene                                          | BG088666  | 10.7962 | 9.7266  | 1.0696 |
| 1428388_at   | Tnks2         | tankyrase, TRF1-interacting ankyrin-related ADP-ribose polymerase 2 | BB339554  | 11.8535 | 10.7843 | 1.0692 |
| 1449053_s_at |               |                                                                     | BB210424  | 8.7545  | 7.6856  | 1.0689 |
| 1426432_a_at | Slc4a4        | solute carrier family 4 (anion exchanger), member 4                 | BE655147  | 5.9160  | 4.8473  | 1.0687 |
| 1424625_a_at | Dennd1a       | DENN/MADD domain containing 1A                                      | BC023016  | 8.0217  | 6.9540  | 1.0677 |
| 1449589_x_at | Nkap          | NFKB activating protein                                             | NM_025937 | 5.7349  | 4.6674  | 1.0674 |
| 1430983_at   | Pdia6         | protein disulfide isomerase associated 6                            | AK005989  | 6.0777  | 5.0107  | 1.0670 |
| 1427574_s_at | Sh3d19        | SH3 domain protein D19                                              | BF232848  | 5.2353  | 4.1689  | 1.0664 |
| 1424410_at   | Ttc8          | tetratricopeptide repeat domain 8                                   | BC017523  | 7.9804  | 6.9140  | 1.0664 |
| 1451021_a_at | Klf5          | Kruppel-like factor 5                                               | BI465857  | 8.2709  | 7.2050  | 1.0659 |
| 1448727_at   | Tle6          | transducin-like enhancer of split 6, homolog of Drosophila E(spl)   | NM_053254 | 8.6542  | 7.5884  | 1.0658 |
| 1457019_s_at | Rdh14         | retinol dehydrogenase 14 (all-trans and 9-cis)                      | BB241474  | 5.7781  | 4.7127  | 1.0654 |
| 1420636_a_at | Dusp12        | dual specificity phosphatase 12                                     | NM_023173 | 8.3846  | 7.3203  | 1.0643 |
| 1429799_at   | Zfp606        | zinc finger protein 606                                             | BB541617  | 6.1862  | 5.1224  | 1.0638 |



|              |               |                                                                       |           |         |         |        |
|--------------|---------------|-----------------------------------------------------------------------|-----------|---------|---------|--------|
| 1455897_x_at | Hmgn1         | high mobility group nucleosomal binding domain 1                      | BF464696  | 12.7419 | 11.6785 | 1.0633 |
| 1425118_at   | Spire2        | spire homolog 2 (Drosophila)                                          | BC026502  | 6.4398  | 5.3765  | 1.0633 |
| 1451350_a_at | Leprot        | leptin receptor overlapping transcript                                | BF228243  | 8.8304  | 7.7674  | 1.0630 |
| 1437866_at   | Dusp18        | dual specificity phosphatase 18                                       | AV276425  | 7.6968  | 6.6339  | 1.0629 |
| 1450543_at   |               |                                                                       | NM_026145 | 6.3015  | 5.2392  | 1.0623 |
| 1421105_at   | Jag1          | jagged 1                                                              | AA880220  | 5.5610  | 4.4990  | 1.0620 |
| 1416859_at   | Fkbp3         | FK506 binding protein 3                                               | NM_013902 | 10.7881 | 9.7282  | 1.0599 |
| 1423463_a_at | D2ErtD750e    | DNA segment, Chr 2, ERATO Doi 750, expressed                          | AK012148  | 9.5445  | 8.4847  | 1.0598 |
| 1456047_at   | Pla2g4b       | phospholipase A2, group IVB (cytosolic)                               | BB151104  | 5.6862  | 4.6265  | 1.0597 |
| 1425029_a_at | Mboat2        | membrane bound O-acyltransferase domain containing 2                  | BC025020  | 9.1524  | 8.0946  | 1.0578 |
| 1416069_at   | Pfkb          | phosphofructokinase, platelet                                         | NM_019703 | 11.4386 | 10.3814 | 1.0571 |
| 1416821_at   | Dgcr14        | DiGeorge syndrome critical region gene 14                             | BC013711  | 6.9690  | 5.9119  | 1.0571 |
| 1427903_at   | Phpt1         | phosphohistidine phosphatase 1                                        | BB650419  | 10.1147 | 9.0583  | 1.0564 |
| 1428299_at   | Dyrk1a        | dual-specificity tyrosine-(Y)-phosphorylation regulated kinase 1a     | AW553942  | 7.9064  | 6.8500  | 1.0564 |
| 1439514_at   | A930004D18Rik | RIKEN cDNA A930004D18 gene                                            | BB277834  | 5.8789  | 4.8229  | 1.0560 |
| 1450948_a_at | Mrp1          | mitochondrial ribosomal protein L1                                    | AK010343  | 9.0986  | 8.0431  | 1.0555 |
| 1420930_s_at | Ctnnal1       | catenin (cadherin associated protein), alpha-like 1                   | BQ031240  | 8.8418  | 7.7869  | 1.0549 |
| 1417877_at   | Eepd1         | endonuclease/exonuclease/phosphatase family domain containing 1       | NM_026189 | 5.6110  | 4.5566  | 1.0544 |
| 1456533_at   | Dpy19l1       | dpy-19-like 1 (C. elegans)                                            | BM119324  | 8.2590  | 7.2050  | 1.0540 |
| 1416521_at   | Sepw1         | selenoprotein W, muscle 1                                             | NM_009156 | 8.2848  | 7.2313  | 1.0535 |
| 1437613_s_at | Ptpdc1        | protein tyrosine phosphatase domain containing 1                      | BB275142  | 7.4668  | 6.4136  | 1.0533 |
| 1438700_at   | Fbnp4         | formin binding protein 4                                              | BG091626  | 6.8313  | 5.7781  | 1.0532 |
| 1435320_at   | Ctdspl2       | CTD (carboxy-terminal domain, RNA polymerase II, polypeptide A) small | BG070878  | 9.1366  | 8.0837  | 1.0529 |
| 1422784_at   | Krt6a         | keratin 6A                                                            | NM_008476 | 5.3493  | 4.2966  | 1.0527 |
| 1416130_at   | Prnp          | prion protein                                                         | BE630020  | 9.8072  | 8.7545  | 1.0527 |
| 1424400_a_at | Aldh1l1       | aldehyde dehydrogenase 1 family, member L1                            | AK007822  | 7.6798  | 6.6275  | 1.0523 |
| 1417157_at   | Actr10        | ARP10 actin-related protein 10                                        | BC002227  | 11.0923 | 10.0408 | 1.0516 |
| 1448121_at   | Wbp2          | WW domain binding protein 2                                           | NM_016852 | 9.1315  | 8.0802  | 1.0513 |
| 1418067_at   | Cfl2          | cofilin 2, muscle                                                     | AI323758  | 11.8420 | 10.7919 | 1.0502 |
| 1452938_at   | Anks1b        | ankyrin repeat and sterile alpha motif domain containing 1B           | BQ174247  | 5.5453  | 4.4954  | 1.0499 |
| 1434987_at   | Aldh2         | aldehyde dehydrogenase 2, mitochondrial                               | AI462635  | 5.9590  | 4.9092  | 1.0499 |
| 1427363_at   |               |                                                                       | BC003304  | 6.8617  | 5.8119  | 1.0497 |
| 1460637_s_at | Pfdn5         | prefoldin 5                                                           | NM_020031 | 11.7719 | 10.7244 | 1.0475 |
| 1433398_at   | Fgd3          | FYVE, RhoGEF and PH domain containing 3                               | AK018025  | 5.8632  | 4.8163  | 1.0468 |
| 1433623_at   | Zfp367        | zinc finger protein 367                                               | BE629588  | 9.8386  | 8.7918  | 1.0467 |
| 1444435_at   | Vps13b        | vacuolar protein sorting 13B (yeast)                                  | BM206224  | 7.0284  | 5.9820  | 1.0463 |
| 1440924_at   | Kif20b        | kinesin family member 20B                                             | BM239553  | 7.4055  | 6.3602  | 1.0453 |
| 1456264_at   | Commd7        | COMM domain containing 7                                              | BB068454  | 5.1484  | 4.1035  | 1.0449 |
| 1459673_at   | Gtf3c1        | general transcription factor III C 1                                  | BB171591  | 5.3414  | 4.2966  | 1.0448 |
| 1418277_at   | Rp9           | retinitis pigmentosa 9 (human)                                        | NM_018739 | 10.9664 | 9.9226  | 1.0437 |
| 1449336_a_at | Slk           | STE20-like kinase                                                     | NM_009289 | 8.7956  | 7.7518  | 1.0437 |
| 1416592_at   | Glxr          | glutaredoxin                                                          | AF276917  | 7.5335  | 6.4898  | 1.0437 |
| 1444583_at   | Nasp          | nuclear autoantigenic sperm protein (histone-binding)                 | AW741754  | 6.2582  | 5.2149  | 1.0433 |
| 1416469_at   | Luzp1         | leucine zipper protein 1                                              | BB705823  | 9.6931  | 8.6501  | 1.0430 |
| 1423137_at   | Rala          | v-ral simian leukemia viral oncogene homolog A (ras related)          | BG073338  | 11.0413 | 9.9983  | 1.0430 |
| 1418070_at   | Cdyl          | chromodomain protein, Y chromosome-like                               | AF081260  | 8.3763  | 7.3336  | 1.0427 |
| 1433699_at   | Tnfrsf3       | tumor necrosis factor, alpha-induced protein 3                        | BM241351  | 8.2986  | 7.2562  | 1.0424 |
| 1452440_at   |               |                                                                       | BI730298  | 7.3659  | 6.3236  | 1.0423 |
| 1455562_at   | Sox12         | SRY-box containing gene 12                                            | BF468186  | 6.7938  | 5.7515  | 1.0422 |
| 1454920_at   | Uhrf2         | ubiquitin-like, containing PHD and RING finger domains 2              | BQ266387  | 8.8698  | 7.8279  | 1.0419 |
| 1442596_at   | Klhdc2        | kelch domain containing 2                                             | BB105408  | 5.0791  | 4.0372  | 1.0419 |
| 1422583_at   | Rab3b         | RAB3B, member RAS oncogene family                                     | NM_023537 | 7.4657  | 6.4242  | 1.0416 |
| 1451959_a_at | Vegfa         | vascular endothelial growth factor A                                  | U50279    | 7.4310  | 6.3902  | 1.0408 |
| 1426165_a_at | Casp3         | caspase 3                                                             | D86352    | 9.1913  | 8.1508  | 1.0405 |
| 1426765_at   | Commd7        | COMM domain containing 7                                              | AK009274  | 9.4072  | 8.3671  | 1.0401 |
| 1443773_at   | Ylpm1         | YLP motif containing 1                                                | AI851834  | 5.8629  | 4.8229  | 1.0400 |
| 1418036_at   | Prim2         | DNA primase, p58 subunit                                              | NM_008922 | 9.6430  | 8.6032  | 1.0398 |

|              |               |                                                                                |           |         |         |        |
|--------------|---------------|--------------------------------------------------------------------------------|-----------|---------|---------|--------|
| 1440345_at   | AI450353      | expressed sequence AI450353                                                    | AI447886  | 6.9605  | 5.9208  | 1.0397 |
| 1449128_at   | Ccdc43        | coiled-coil domain containing 43                                               | NM_025918 | 7.4224  | 6.3827  | 1.0397 |
| 1424927_at   | Glpr1         | GLI pathogenesis-related 1 (glioma)                                            | BC025083  | 5.0098  | 3.9701  | 1.0397 |
| 1457184_at   |               |                                                                                | BB472173  | 6.1126  | 5.0730  | 1.0396 |
| 1425902_a_at | Nfkb2         | nuclear factor of kappa light polypeptide gene enhancer in B cells 2, p49/p100 | AF155372  | 8.7298  | 7.6903  | 1.0395 |
| 1460688_s_at | Unc119b       | unc-119 homolog B (C. elegans)                                                 | BB390422  | 9.5897  | 8.5503  | 1.0395 |
| 1447781_s_at | Trmt10a       | tRNA methyltransferase 10 homolog A (S. cerevisiae)                            | AV214521  | 8.0779  | 7.0394  | 1.0386 |
| 1444371_at   | A630007B06Rik | RIKEN cDNA A630007B06 gene                                                     | BB268463  | 5.8297  | 4.7912  | 1.0385 |
| 1426653_at   | Mcm3          | minichromosome maintenance deficient 3 (S. cerevisiae)                         | BI658327  | 8.6837  | 7.6454  | 1.0384 |
| 1431031_at   | Arid4b        | AT rich interactive domain 4B (RBP1-like)                                      | BE286482  | 6.0489  | 5.0107  | 1.0382 |
| 1417203_at   | Ethe1         | ethylmalonic encephalopathy 1                                                  | BC010592  | 8.8473  | 7.8091  | 1.0382 |
| 1445418_at   | Smg6          | Smg-6 homolog, nonsense mediated mRNA decay factor (C. elegans)                | BB743283  | 5.4443  | 4.4064  | 1.0380 |
| 1450095_a_at | Acyp1         | acylphosphatase 1, erythrocyte (common) type                                   | NM_025421 | 8.9659  | 7.9280  | 1.0379 |
| 1438519_at   | Klhl24        | kelch-like 24 (Drosophila)                                                     | BM124262  | 5.3337  | 4.2966  | 1.0371 |
| 1460180_at   | Hexb          | hexosaminidase B                                                               | NM_010422 | 10.2230 | 9.1863  | 1.0368 |
| 1433974_at   | Sephs1        | selenophosphate synthetase 1                                                   | BB293127  | 9.5029  | 8.4667  | 1.0362 |
| 1420028_s_at | Mcm3          | minichromosome maintenance deficient 3 (S. cerevisiae)                         | C80350    | 11.4627 | 10.4265 | 1.0362 |
| 1433682_at   | Arhgef17      | Rho guanine nucleotide exchange factor (GEF) 17                                | BE287052  | 8.3569  | 7.3208  | 1.0361 |
| 1419342_at   | Tram2         | translocating chain-associating membrane protein 2                             | NM_133252 | 6.3022  | 5.2664  | 1.0359 |
| 1424573_at   | Tmed5         | transmembrane emp24 protein transport domain containing 5                      | BC020076  | 10.0578 | 9.0227  | 1.0351 |
| 1447711_x_at | 4933412E12Rik | RIKEN cDNA 4933412E12 gene                                                     | BB265147  | 8.1083  | 7.0735  | 1.0348 |
| 1433915_s_at | Epn2          | epsin 2                                                                        | BG794880  | 9.2402  | 8.2054  | 1.0348 |
| 1437120_at   | Snx30         | sorting nexin family member 30                                                 | BB320376  | 7.6622  | 6.6275  | 1.0347 |
| 1425347_a_at | Zfp318        | zinc finger protein 318                                                        | BB168536  | 5.9541  | 4.9195  | 1.0346 |
| 1428527_at   | Snx7          | sorting nexin 7                                                                | AK011015  | 8.8690  | 7.8344  | 1.0346 |
| 1430634_a_at | Pfkip         | phosphofructokinase, platelet                                                  | BB076574  | 7.4069  | 6.3729  | 1.0340 |
| 1459470_at   |               |                                                                                | AW546412  | 5.0037  | 3.9701  | 1.0336 |
| 1460199_a_at | Pafah1b1      | platelet-activating factor acetylhydrolase, isoform 1b, subunit 1              | BE688382  | 11.2658 | 10.2323 | 1.0335 |
| 1429356_s_at | Gggs1         | geranylgeranyl diphosphate synthase 1                                          | AW538065  | 6.9921  | 5.9590  | 1.0331 |
| 1440318_at   | Wdr35         | WD repeat domain 35                                                            | BB475816  | 6.3015  | 5.2685  | 1.0330 |
| 1451417_at   | Brcal         | breast cancer 1                                                                | U31625    | 7.6454  | 6.6129  | 1.0325 |
| 1448226_at   | Rrm2          | ribonucleotide reductase M2                                                    | NM_009104 | 10.7646 | 9.7328  | 1.0318 |
| 1449418_s_at | Fbxo36        | F-box protein 36                                                               | NM_025386 | 7.8637  | 6.8323  | 1.0314 |
| 1451382_at   | Chac1         | ChaC, cation transport regulator 1                                             | BC025169  | 9.6661  | 8.6350  | 1.0312 |
| 1435108_at   | Arhgap22      | Rho GTPase activating protein 22                                               | BG295243  | 8.4251  | 7.3941  | 1.0310 |
| 1440999_at   | Zfp697        | zinc finger protein 697                                                        | BB560193  | 6.5578  | 5.5269  | 1.0309 |
| 1424630_a_at | Brcal         | breast cancer 1                                                                | U31625    | 6.7279  | 5.6970  | 1.0309 |
| 1446280_at   |               |                                                                                | BB472891  | 5.7515  | 4.7207  | 1.0308 |
| 1429449_at   | Samd4         | sterile alpha motif domain containing 4                                        | BF319665  | 7.3855  | 6.3554  | 1.0302 |
| 1439929_at   |               |                                                                                | AW557531  | 5.8297  | 4.8000  | 1.0297 |
| 1442295_at   | Arpc2         | actin related protein 2/3 complex, subunit 2                                   | BM244229  | 5.6970  | 4.6674  | 1.0295 |
| 1455114_at   | Ccno          | cyclin O                                                                       | BB547482  | 6.1433  | 5.1140  | 1.0293 |
| 1447433_at   | Wdfy3         | WD repeat and FYVE domain containing 3                                         | BB743316  | 5.9027  | 4.8734  | 1.0293 |
| 1422308_a_at | Lgals7        | lectin, galactose binding, soluble 7                                           | AF038562  | 8.1871  | 7.1586  | 1.0284 |
| 1415736_at   | Pfdn5         | prefoldin 5                                                                    | NM_020031 | 11.6310 | 10.6026 | 1.0284 |
| 1451362_at   | Rab71l        | RAB7, member RAS oncogene family-like 1                                        | BC016133  | 7.1687  | 6.1404  | 1.0283 |
| 1434469_at   | Otud4         | OTU domain containing 4                                                        | BM238914  | 8.2615  | 7.2332  | 1.0282 |
| 1416952_at   | Atp6v1d       | ATPase, H+ transporting, lysosomal V1 subunit D                                | NM_023721 | 10.0957 | 9.0677  | 1.0279 |
| 1419270_a_at | Dut           | deoxyuridine triphosphatase                                                    | AF091101  | 11.5111 | 10.4835 | 1.0276 |
| 1452991_at   | Chd2          | chromodomain helicase DNA binding protein 2                                    | BB211667  | 6.2582  | 5.2306  | 1.0275 |
| 1430971_a_at | Aqr           | aquarius                                                                       | AK020468  | 5.7781  | 4.7506  | 1.0275 |
| 1454702_at   | 4930503L19Rik | RIKEN cDNA 4930503L19 gene                                                     | AI450962  | 7.0534  | 6.0270  | 1.0264 |
| 1448868_at   | Scand1        | SCAN domain-containing 1                                                       | NM_020255 | 9.8072  | 8.7809  | 1.0262 |
| 1440966_at   | 7-Mar         | membrane-associated ring finger (C3HC4) 7                                      | BB248730  | 7.5840  | 6.5578  | 1.0262 |
| 1425362_at   | Agfg2         | ArfGAP with FG repeats 2                                                       | BC003330  | 7.2842  | 6.2582  | 1.0260 |
| 1422664_at   | Rab10         | RAB10, member RAS oncogene family                                              | NM_016676 | 9.8681  | 8.8430  | 1.0251 |
| 1424834_s_at | Itpr2         | inositol 1,4,5-triphosphate receptor 2                                         | BC013815  | 5.6374  | 4.6127  | 1.0246 |
| 1450993_at   | Pask          | PAS domain containing serine/threonine kinase                                  | BB729869  | 7.8678  | 6.8439  | 1.0239 |
| 1453105_at   | Zfp263        | zinc finger protein 263                                                        | BG069835  | 8.1166  | 7.0932  | 1.0234 |

|              |               |                                                                              |           |         |         |        |
|--------------|---------------|------------------------------------------------------------------------------|-----------|---------|---------|--------|
| 1438672_at   | Parvb         | parvin, beta                                                                 | BI134721  | 10.2100 | 9.1870  | 1.0230 |
| 1428282_at   | Tbce          | tubulin-specific chaperone E                                                 | AK011899  | 8.9065  | 7.8839  | 1.0226 |
| 1452598_at   | Gins1         | GINS complex subunit 1 (Psf1 homolog)                                        | AK013116  | 9.9132  | 8.8906  | 1.0226 |
| 1449441_a_at | Wbp1          | WW domain binding protein 1                                                  | NM_016757 | 9.5527  | 8.5309  | 1.0219 |
| 1455314_at   | Lpp           | LIM domain containing preferred translocation partner in lipoma              | BM236111  | 9.1870  | 8.1659  | 1.0211 |
| 1455549_at   | Sestd1        | SEC14 and spectrin domains 1                                                 | BB278422  | 9.2660  | 8.2458  | 1.0203 |
| 1417220_at   | Fah           | fumarylacetoacetate hydrolase                                                | NM_010176 | 8.5503  | 7.5314  | 1.0189 |
| 1423186_at   | Tiam2         | T cell lymphoma invasion and metastasis 2                                    | BM228957  | 8.3300  | 7.3118  | 1.0181 |
| 1448620_at   | Fcgr3         | Fc receptor, IgG, low affinity III                                           | NM_010188 | 5.3765  | 4.3588  | 1.0178 |
| 1419252_at   | Eps15         | epidermal growth factor receptor pathway substrate 15                        | BG067649  | 9.7413  | 8.7241  | 1.0172 |
| 1447564_x_at | Piwil4        | piwi-like homolog 4 (Drosophila)                                             | BB814395  | 5.0970  | 4.0802  | 1.0167 |
| 1428848_a_at | Macf1         | microtubule-actin crosslinking factor 1                                      | BM248206  | 8.3584  | 7.3417  | 1.0167 |
| 1434240_at   | 463243411Rik  | RIKEN cDNA 463243411 gene                                                    | BB463610  | 8.2916  | 7.2750  | 1.0166 |
| 1423061_at   | Arvcf         | armadillo repeat gene deleted in velo-cardio-facial syndrome                 | BE947943  | 5.5405  | 4.5247  | 1.0158 |
| 1421790_a_at | Kcnab3        | potassium voltage-gated channel, shaker-related subfamily, beta member 3     | NM_010599 | 5.5405  | 4.5248  | 1.0157 |
| 1418664_at   | Mpdz          | multiple PDZ domain protein                                                  | AK019164  | 8.8994  | 7.8839  | 1.0155 |
| 1450378_at   | Tapbp         | TAP binding protein                                                          | AF043943  | 7.8961  | 6.8811  | 1.0150 |
| 1422172_x_at | 2810408B13Rik | RIKEN cDNA 2810408B13 gene                                                   | NM_029583 | 5.3054  | 4.2905  | 1.0149 |
| 1427705_a_at | Nfkb1         | nuclear factor of kappa light polypeptide gene enhancer in B cells 1, p105   | L28118    | 9.9492  | 8.9343  | 1.0149 |
| 1417406_at   | Sertad1       | SERTA domain containing 1                                                    | AF366401  | 9.5803  | 8.5656  | 1.0148 |
| 1423164_at   |               |                                                                              | AK010724  | 7.5045  | 6.4898  | 1.0146 |
| 1445201_at   | Zfp53         | zinc finger protein 53                                                       | BB176857  | 6.2831  | 5.2685  | 1.0146 |
| 1433468_at   | 6430527G18Rik | RIKEN cDNA 6430527G18 gene                                                   | BB770958  | 7.1952  | 6.1807  | 1.0144 |
| 1418697_at   | Inmt          | indolethylamine N-methyltransferase                                          | NM_009349 | 5.5132  | 4.4990  | 1.0142 |
| 1450843_a_at | Serpinh1      | serine (or cysteine) peptidase inhibitor, clade H, member 1                  | BI220012  | 11.6501 | 10.6360 | 1.0141 |
| 1436188_a_at | Ndr4          | N-myc downstream regulated gene 4                                            | AI837704  | 9.1994  | 8.1861  | 1.0133 |
| 1460077_at   | Ttc3          | tetratricopeptide repeat domain 3                                            | BB466388  | 5.4940  | 4.4807  | 1.0133 |
| 1434106_at   | Epm2aip1      | EPM2A (laforin) interacting protein 1                                        | AV340515  | 8.7241  | 7.7111  | 1.0130 |
| 1449144_at   | Gna11         | guanine nucleotide binding protein, alpha 11                                 | NM_010301 | 10.1428 | 9.1298  | 1.0130 |
| 1417919_at   | Ppp1r7        | protein phosphatase 1, regulatory (inhibitor) subunit 7                      | NM_023200 | 9.4740  | 8.4612  | 1.0128 |
| 1418824_at   | Arf6          | ADP-ribosylation factor 6                                                    | BI248938  | 8.1912  | 7.1787  | 1.0125 |
| 1422533_at   | Cyp51         | cytochrome P450, family 51                                                   | NM_020010 | 9.6386  | 8.6265  | 1.0121 |
| 1424365_at   | 1810037117Rik | RIKEN cDNA 1810037117 gene                                                   | BC002135  | 11.9111 | 10.8990 | 1.0121 |
| 1452969_at   | Atp2b1        | ATPase, Ca <sup>++</sup> transporting, plasma membrane 1                     | BI080417  | 9.0556  | 8.0437  | 1.0119 |
| 1451740_at   | Paip1         | polyadenylate binding protein-interacting protein 1                          | BC019726  | 8.7229  | 7.7111  | 1.0118 |
| 1429661_at   | Rhobtb3       | Rho-related BTB domain containing 3                                          | BG801497  | 8.3444  | 7.3328  | 1.0116 |
| 1441814_s_at | Rpain         | RPA interacting protein                                                      | AI448238  | 8.3533  | 7.3417  | 1.0116 |
| 1446972_at   | D15Wsu126e    | DNA segment, Chr 15, Wayne State University 126, expressed                   | BG063165  | 6.6801  | 5.6689  | 1.0112 |
| 1450722_at   | Nup50         | nucleoporin 50                                                               | NM_016714 | 10.8367 | 9.8256  | 1.0111 |
| 1456022_at   | Hipk2         | homeodomain interacting protein kinase 2                                     | BB554636  | 7.5434  | 6.5323  | 1.0110 |
| 1439791_at   | Gm527         | predicted gene 527                                                           | BB116558  | 6.7353  | 5.7245  | 1.0108 |
| 1416641_at   | Lig1          | ligase I, DNA, ATP-dependent                                                 | NM_010715 | 11.2932 | 10.2825 | 1.0107 |
| 1454815_at   | Sertad2       | SERTA domain containing 2                                                    | BI219769  | 10.3706 | 9.3602  | 1.0103 |
| 1435659_a_at | Tpi1          | triosephosphate isomerase 1                                                  | AA153477  | 12.4647 | 11.4545 | 1.0102 |
| 1439484_at   | Pde7a         | phosphodiesterase 7A                                                         | BM245060  | 8.7689  | 7.7594  | 1.0095 |
| 1419635_at   | 4833420G17Rik | RIKEN cDNA 4833420G17 gene                                                   | BG067119  | 8.4030  | 7.3941  | 1.0089 |
| 1432399_a_at | Epha1         | Eph receptor A1                                                              | AK017662  | 5.3054  | 4.2966  | 1.0088 |
| 1449419_at   | Dock8         | dedicator of cytokinesis 8                                                   | NM_028785 | 7.2918  | 6.2831  | 1.0087 |
| 1442933_at   | Foxk2         | forkhead box K2                                                              | BB046659  | 6.1185  | 5.1106  | 1.0080 |
| 1436597_at   | Ankhd1        | ankyrin repeat and KH domain containing 1                                    | BM243710  | 7.0154  | 6.0075  | 1.0079 |
| 1436181_at   | Asap2         | ArfGAP with SH3 domain, ankyrin repeat and PH domain 2                       | AV077160  | 8.8705  | 7.8626  | 1.0079 |
| 1442061_at   | Btbd7         | BTB (POZ) domain containing 7                                                | BB199960  | 7.9985  | 6.9911  | 1.0075 |
| 1448858_at   | Ulk2          | unc-51 like kinase 2                                                         | NM_013881 | 8.0382  | 7.0309  | 1.0073 |
| 1435488_at   | Mthfd2l       | methylenetetrahydrofolate dehydrogenase (NADP <sup>+</sup> dependent) 2-like | BB427289  | 8.5507  | 7.5434  | 1.0073 |
| 1436616_at   | Inpp4a        | inositol polyphosphate-4-phosphatase, type I                                 | BE945631  | 7.7561  | 6.7488  | 1.0073 |
| 1455354_at   | Dcaf5         | DDB1 and CUL4 associated factor 5                                            | BG061773  | 7.9752  | 6.9682  | 1.0070 |

|              |               |                                                                                              |           |         |         |         |
|--------------|---------------|----------------------------------------------------------------------------------------------|-----------|---------|---------|---------|
| 1427128_at   | Ptpn23        | protein tyrosine phosphatase, non-receptor type 23                                           | BM195862  | 8.0273  | 7.0212  | 1.0062  |
| 1424817_at   | Spef1         | sperm flagellar 1                                                                            | BC006046  | 6.1240  | 5.1179  | 1.0061  |
| 1459845_at   |               |                                                                                              | AW558581  | 5.1383  | 4.1325  | 1.0058  |
| 1437611_x_at | Kif2c         | kinesin family member 2C                                                                     | BB104669  | 10.4834 | 9.4775  | 1.0058  |
| 1425098_at   | Zfp106        | zinc finger protein 106                                                                      | BC025424  | 6.8439  | 5.8382  | 1.0058  |
| 1435989_x_at | Krt8          | keratin 8                                                                                    | AW322280  | 5.3556  | 4.3499  | 1.0056  |
| 1442072_at   | C230081A13Rik | RIKEN cDNA C230081A13 gene                                                                   | BM227237  | 6.6255  | 5.6205  | 1.0051  |
| 1438276_at   |               |                                                                                              | BM239260  | 5.4443  | 4.4400  | 1.0043  |
| 1454734_at   | Lef1          | lymphoid enhancer binding factor 1                                                           | AV156352  | 7.4942  | 6.4898  | 1.0043  |
| 1449317_at   | Cflar         | CASP8 and FADD-like apoptosis regulator                                                      | NM_009805 | 6.7682  | 5.7644  | 1.0038  |
| 1458343_x_at | Med6          | mediator of RNA polymerase II transcription, subunit 6 homolog (yeast)                       | AV070715  | 7.4110  | 6.4073  | 1.0037  |
| 1455941_s_at | Map2k5        | mitogen-activated protein kinase kinase 5                                                    | BB025010  | 7.4774  | 6.4737  | 1.0037  |
| 1417289_at   | Plekha2       | pleckstrin homology domain-containing, family A (phosphoinositide binding specific) member 2 | NM_031257 | 7.4935  | 6.4898  | 1.0037  |
| 1428936_at   | Atp2b1        | ATPase, Ca <sup>++</sup> transporting, plasma membrane 1                                     | BI080417  | 9.0704  | 8.0672  | 1.0032  |
| 1418901_at   | Cebpb         | CCAAT/enhancer binding protein (C/EBP), beta                                                 | NM_009883 | 11.3247 | 10.3218 | 1.0029  |
| 1459005_at   |               |                                                                                              | BG798107  | 6.7353  | 5.7324  | 1.0029  |
| 1418539_a_at | Ptpre         | protein tyrosine phosphatase, receptor type, E                                               | U35368    | 8.0850  | 7.0826  | 1.0024  |
| 1434336_s_at | Rcor1         | REST corepressor 1                                                                           | AW543416  | 10.1559 | 9.1537  | 1.0022  |
| 1431665_a_at | Timm8b        | translocase of inner mitochondrial membrane 8 homolog b (yeast)                              | AK004190  | 10.7617 | 9.7597  | 1.0020  |
| 1420743_a_at | Ppp3cc        | protein phosphatase 3, catalytic subunit, gamma isoform                                      | NM_008915 | 6.0989  | 5.0970  | 1.0020  |
| 1418459_at   | Ccdc91        | coiled-coil domain containing 91                                                             | AA067702  | 6.3729  | 5.3717  | 1.0012  |
| 1455347_at   | Rtel1         | regulator of telomere elongation helicase 1                                                  | BB752007  | 7.5278  | 6.5268  | 1.0010  |
| 1429294_at   | Trip13        | thyroid hormone receptor interactor 13                                                       | AK010336  | 9.5350  | 8.5348  | 1.0002  |
| 1419177_at   | Vps37a        | vacuolar protein sorting 37A (yeast)                                                         | AK008752  | 8.2627  | 9.2634  | -1.0007 |
| 1453045_at   | Ccdc41        | coiled-coil domain containing 41                                                             | BM876680  | 8.4341  | 9.4358  | -1.0016 |
| 1439960_at   | Rpusd2        | RNA pseudouridylate synthase domain containing 2                                             | AI746468  | 4.7629  | 5.7646  | -1.0017 |
| 1451511_at   | Hibch         | 3-hydroxyisobutyryl-Coenzyme A hydrolase                                                     | BC026437  | 5.6110  | 6.6129  | -1.0018 |
| 1426513_at   | Rbm28         | RNA binding motif protein 28                                                                 | BM228459  | 6.6564  | 7.6584  | -1.0019 |
| 1456214_at   | Pcdh7         | protocadherin 7                                                                              | BB197591  | 5.6175  | 6.6194  | -1.0019 |
| 1447783_x_at | Slc25a39      | solute carrier family 25, member 39                                                          | BB514802  | 8.0250  | 9.0276  | -1.0025 |
| 1442659_at   | Pcdh9         | protocadherin 9                                                                              | BB244656  | 7.5356  | 8.5390  | -1.0034 |
| 1439047_s_at | Recql         | RecQ protein-like                                                                            | BB258011  | 8.1909  | 9.1944  | -1.0036 |
| 1433754_at   | Mbnl2         | muscleblind-like 2                                                                           | BI649713  | 10.8172 | 11.8220 | -1.0048 |
| 1447201_at   |               |                                                                                              | BG067575  | 4.4385  | 5.4443  | -1.0058 |
| 1454180_at   | Armc2         | armadillo repeat containing 2                                                                | AK011447  | 4.9988  | 6.0047  | -1.0059 |
| 1442315_at   | Foxd2         | forkhead box D2                                                                              | AI426778  | 5.4345  | 6.4409  | -1.0064 |
| 1416629_at   | Slc1a5        | solute carrier family 1 (neutral amino acid transporter), member 5                           | NM_009201 | 8.0779  | 9.0845  | -1.0065 |
| 1428688_at   | Pcd11         | programmed cell death 11                                                                     | AK003899  | 8.3497  | 9.3565  | -1.0068 |
| 1423482_at   | Uros          | uroporphyrinogen III synthase                                                                | AW545289  | 6.3866  | 7.3941  | -1.0075 |
| 1427140_at   | Pvt1          | plasmacytoma variant translocation 1                                                         | BE956863  | 6.7532  | 7.7607  | -1.0075 |
| 1455182_at   | Kif1b         | kinesin family member 1B                                                                     | AV104668  | 7.6668  | 8.6743  | -1.0075 |
| 1423295_at   | Tm9sf2        | transmembrane 9 superfamily member 2                                                         | BB747462  | 8.2773  | 9.2851  | -1.0078 |
| 1449909_at   | 2010005H15Rik | RIKEN cDNA 2010005H15 gene                                                                   | NM_029733 | 4.1035  | 5.1113  | -1.0079 |
| 1433991_x_at | Dbi           | diazepam binding inhibitor                                                                   | AV007315  | 11.9487 | 12.9567 | -1.0080 |
| 1453049_at   | Svip          | small VCP/p97-interacting protein                                                            | BF011349  | 4.1953  | 5.2034  | -1.0082 |
| 1417211_a_at | 1110032A03Rik | RIKEN cDNA 1110032A03 gene                                                                   | NM_023483 | 6.1198  | 7.1280  | -1.0082 |
| 1439532_s_at | Kif13a        | kinesin family member 13A                                                                    | AV277094  | 6.4952  | 7.5034  | -1.0082 |
| 1446750_at   | Impact        | imprinted and ancient                                                                        | BB524087  | 5.7535  | 6.7621  | -1.0086 |
| 1448414_at   | Rad1          | RAD1 homolog (S. pombe)                                                                      | NM_011232 | 9.2413  | 10.2501 | -1.0088 |
| 1435368_a_at | Parp1         | poly (ADP-ribose) polymerase family, member 1                                                | BB767586  | 9.1324  | 10.1413 | -1.0089 |
| 1429079_a_at | 2310045N01Rik | RIKEN cDNA 2310045N01 gene                                                                   | AK009829  | 7.8680  | 8.8770  | -1.0090 |
| 1433473_x_at | Tm2d2         | TM2 domain containing 2                                                                      | BB815513  | 7.5990  | 8.6081  | -1.0091 |
| 1435984_at   | Zfp40         | zinc finger protein 40                                                                       | AI450803  | 4.4105  | 5.4196  | -1.0092 |
| 1425742_a_at | Tsc22d1       | TSC22 domain family, member 1                                                                | AF201285  | 11.6119 | 12.6224 | -1.0105 |
| 1449189_at   | BC003266      | cDNA sequence BC003266                                                                       | NM_030252 | 7.4938  | 8.5047  | -1.0108 |
| 1438631_x_at | Ttc13         | tetratricopeptide repeat domain 13                                                           | BB098824  | 9.6898  | 10.7006 | -1.0108 |
| 1457571_at   | Zfp68         | zinc finger protein 68                                                                       | BB378875  | 4.6674  | 5.6784  | -1.0109 |
| 1424675_at   | Slc39a6       | solute carrier family 39 (metal ion transporter), member 6                                   | BB825002  | 8.0564  | 9.0675  | -1.0111 |
| 1435259_s_at | Tmem141       | transmembrane protein 141                                                                    | AW551717  | 7.4890  | 8.5007  | -1.0117 |

|              |               |                                                                                  |           |         |         |         |
|--------------|---------------|----------------------------------------------------------------------------------|-----------|---------|---------|---------|
| 1423158_at   | Gnpnat1       | glucosamine-phosphate N-acetyltransferase 1                                      | AK008566  | 8.8720  | 9.8840  | -1.0119 |
| 1453589_a_at |               |                                                                                  | BI737178  | 6.9332  | 7.9457  | -1.0125 |
| 1426152_a_at | Kitl          | kit ligand                                                                       | M64262    | 8.1640  | 9.1768  | -1.0129 |
| 1424232_a_at | Ftsjd1        | FtsJ methyltransferase domain containing 1                                       | BC025546  | 6.3464  | 7.3594  | -1.0129 |
| 1443986_at   | Cdc73         | cell division cycle 73, Paf1/RNA polymerase II complex component                 | BB211070  | 5.9778  | 6.9911  | -1.0133 |
| 1416838_at   | Mut           | methylmalonyl-Coenzyme A mutase                                                  | NM_008650 | 9.1460  | 10.1597 | -1.0136 |
| 1440264_at   |               |                                                                                  | BB213500  | 5.2430  | 6.2569  | -1.0139 |
| 1453260_a_at | Ppp2r2a       | protein phosphatase 2 (formerly 2A), regulatory subunit B (PR 52), alpha isoform | AK010380  | 9.2195  | 10.2335 | -1.0140 |
| 1451908_a_at | Sec14l1       | SEC14-like 1 ( <i>S. cerevisiae</i> )                                            | BC005766  | 5.4771  | 6.4916  | -1.0145 |
| 1439014_at   | Mb21d2        | Mab-21 domain containing 2                                                       | BB703667  | 6.0039  | 7.0185  | -1.0146 |
| 1434120_a_at | Metap2        | methionine aminopeptidase 2                                                      | AW742814  | 10.9867 | 12.0015 | -1.0148 |
| 1420849_at   | Crnk1l        | Crn, crooked neck-like 1 ( <i>Drosophila</i> )                                   | AV143435  | 4.8229  | 5.8382  | -1.0153 |
| 1423161_s_at | Spred1        | sprouty protein with EVH-1 domain 1, related sequence                            | BQ044290  | 9.4175  | 10.4328 | -1.0153 |
| 1430537_at   | Trmt12        | tRNA methyltransferase 12 homolog ( <i>S. cerevisiae</i> )                       | AK019481  | 4.1364  | 5.1519  | -1.0154 |
| 1448684_at   | Ppp1r2        | protein phosphatase 1, regulatory (inhibitor) subunit 2                          | NM_025800 | 9.9771  | 10.9926 | -1.0155 |
| 1457356_at   | Gm19270       | predicted gene, 19270                                                            | BI793602  | 5.5812  | 6.5974  | -1.0162 |
| 1443233_at   |               |                                                                                  | BB042748  | 4.5947  | 5.6110  | -1.0163 |
| 1438418_at   | Mudeng        | WDZ/AFHWZ domain containing, death-inducing                                      | BB536931  | 6.9646  | 7.9820  | -1.0175 |
| 1455351_at   | U2surp        | U2 snRNP-associated SURP domain containing                                       | AV340615  | 6.4242  | 7.4421  | -1.0179 |
| 1433626_at   | Plscr4        | phospholipid scramblase 4                                                        | BB826296  | 6.8729  | 7.8910  | -1.0181 |
| 1450992_a_at | Meis1         | Meis homeobox 1                                                                  | AW547821  | 4.6206  | 5.6402  | -1.0196 |
| 1456702_x_at | Mat2a         | methionine adenosyltransferase II, alpha                                         | BB488978  | 8.9521  | 9.9718  | -1.0198 |
| 1417212_at   | Fam195a       | family with sequence similarity 195, member A                                    | NM_026633 | 8.6134  | 9.6334  | -1.0200 |
| 1439075_at   | Polr3f        | polymerase (RNA) III (DNA directed) polypeptide F                                | AI931937  | 7.7209  | 8.7410  | -1.0201 |
| 1416548_at   | Slc35b4       | solute carrier family 35, member B4                                              | BB320416  | 6.7123  | 7.7333  | -1.0210 |
| 1437494_at   | Mapkapk3      | mitogen-activated protein kinase-activated protein kinase 3                      | BB469472  | 8.1300  | 9.1511  | -1.0212 |
| 1454779_s_at | C230052I12Rik | RIKEN cDNA C230052I12 gene                                                       | BG072034  | 6.3631  | 7.3843  | -1.0212 |
| 1435017_at   | Cisd3         | CDGSH iron sulfur domain 3                                                       | AV000569  | 9.6297  | 10.6513 | -1.0216 |
| 1451848_a_at | Cryz          | crystallin, zeta                                                                 | BC003800  | 7.9861  | 9.0081  | -1.0220 |
| 1447491_at   |               |                                                                                  | BE987722  | 6.0931  | 7.1154  | -1.0222 |
| 1431133_at   | Arhgap18      | Rho GTPase activating protein 18                                                 | BE307291  | 6.3283  | 7.3506  | -1.0223 |
| 1430332_a_at | Gusb          | glucuronidase, beta                                                              | AK002832  | 6.6012  | 7.6236  | -1.0224 |
| 1440634_at   |               |                                                                                  | BG072806  | 4.3539  | 5.3765  | -1.0226 |
| 1451743_at   | D19Wsu162e    | DNA segment, Chr 19, Wayne State University 162, expressed                       | BC026369  | 4.6883  | 5.7112  | -1.0229 |
| 1420093_s_at | Hnrpd1        | heterogeneous nuclear ribonucleoprotein D-like                                   | AU015266  | 9.5794  | 10.6026 | -1.0232 |
| 1453194_at   | 4930432K21Rik | RIKEN cDNA 4930432K21 gene                                                       | AK015293  | 4.1684  | 5.1918  | -1.0233 |
| 1427368_x_at | Fes           | feline sarcoma oncogene                                                          | BG867327  | 5.9095  | 6.9332  | -1.0237 |
| 1453109_at   | Arsk          | arylsulfatase K                                                                  | AK013194  | 6.0047  | 7.0284  | -1.0237 |
| 1449718_s_at | 4930453N24Rik | RIKEN cDNA 4930453N24 gene                                                       | AI649104  | 5.7515  | 6.7753  | -1.0238 |
| 1458438_at   | Ccdc122       | coiled-coil domain containing 122                                                | AW554226  | 7.2562  | 8.2802  | -1.0240 |
| 1433885_at   | Iqgap2        | IQ motif containing GTPase activating protein 2                                  | BM240173  | 6.4595  | 7.4838  | -1.0242 |
| 1422809_at   | Rims2         | regulating synaptic membrane exocytosis 2                                        | NM_053271 | 4.5566  | 5.5812  | -1.0246 |
| 1431821_a_at | Eps8l1        | EPS8-like 1                                                                      | AK014556  | 4.5566  | 5.5812  | -1.0246 |
| 1416934_at   | Mtm1          | X-linked myotubular myopathy gene 1                                              | NM_019926 | 6.5424  | 7.5671  | -1.0247 |
| 1448603_at   | Srpk2         | serine/arginine-rich protein specific kinase 2                                   | NM_009274 | 7.2935  | 8.3184  | -1.0249 |
| 1452898_at   | Vps36         | vacuolar protein sorting 36 (yeast)                                              | AK013045  | 7.6366  | 8.6617  | -1.0251 |
| 1424026_s_at | Gim1          | glycoprotein integral membrane 1                                                 | BC013529  | 8.1502  | 9.1754  | -1.0253 |
| 1420129_s_at | D10Wsu52e     | DNA segment, Chr 10, Wayne State University 52, expressed                        | AA409545  | 10.7388 | 11.7643 | -1.0254 |
| 1434291_a_at | Serf1         | small EDRK-rich factor 1                                                         | AA709993  | 7.5664  | 8.5920  | -1.0256 |
| 1433859_at   | Ino80c        | INO80 complex subunit C                                                          | BB207820  | 7.0011  | 8.0272  | -1.0261 |
| 1455309_at   | Ano6          | anoctamin 6                                                                      | BG074632  | 9.3361  | 10.3625 | -1.0265 |
| 1435353_a_at |               |                                                                                  | BI454991  | 7.9396  | 8.9664  | -1.0268 |
| 1438915_at   | 6720401G13Rik | RIKEN cDNA 6720401G13 gene                                                       | AI452037  | 4.1370  | 5.1645  | -1.0275 |
| 1458376_at   | B930025B16Rik | RIKEN cDNA B930025B16 gene                                                       | BE648536  | 6.5788  | 7.6064  | -1.0276 |
| 1435455_at   | Iffo2         | intermediate filament family orphan 2                                            | BQ031259  | 8.1911  | 9.2189  | -1.0278 |
| 1426884_at   | Rmnd5a        | required for meiotic nuclear division 5 homolog A ( <i>S. cerevisiae</i> )       | BG795169  | 9.1944  | 10.2223 | -1.0278 |
| 1426313_at   | Bre           | brain and reproductive organ-expressed protein                                   | BE984258  | 9.2870  | 10.3150 | -1.0280 |
| 1426062_a_at | Casp7         | caspase 7                                                                        | U67321    | 4.8719  | 5.9003  | -1.0285 |
| 1439049_at   | Dph5          | DPH5 homolog ( <i>S. cerevisiae</i> )                                            | BG229936  | 5.4771  | 6.5058  | -1.0287 |

|              |               |                                                                        |           |         |         |         |
|--------------|---------------|------------------------------------------------------------------------|-----------|---------|---------|---------|
| 1457954_at   |               |                                                                        | BE980601  | 4.0372  | 5.0659  | -1.0287 |
| 1455268_at   | Dph3          | DPH3 homolog (KT11, <i>S. cerevisiae</i> )                             | BB366576  | 5.4443  | 6.4737  | -1.0294 |
| 1445422_at   | LOC621549     | uncharacterized LOC621549                                              | BB503979  | 4.6674  | 5.6970  | -1.0295 |
| 1456782_at   |               |                                                                        | BB525604  | 6.0099  | 7.0394  | -1.0295 |
| 1443924_at   | Wnk3-ps       | WNK lysine deficient protein kinase 3, pseudogene                      | BB084132  | 5.3765  | 6.4066  | -1.0300 |
| 1455819_at   | Rod1          | ROD1 regulator of differentiation 1 ( <i>S. pombe</i> )                | BI690175  | 10.2855 | 11.3157 | -1.0302 |
| 1436623_at   | Entpd7        | ectonucleoside triphosphate diphosphohydrolase 7                       | AV381133  | 6.1382  | 7.1687  | -1.0305 |
| 1436422_at   | BC026590      | cDNA sequence BC026590                                                 | BB459141  | 7.0755  | 8.1061  | -1.0306 |
| 1459983_at   | Impa2         | inositol (myo)-1(or 4)-monophosphatase 2                               | AI115397  | 6.0418  | 7.0726  | -1.0308 |
| 1443183_at   | Huwe1         | HECT, UBA and WWE domain containing 1                                  | AV319988  | 3.9792  | 5.0107  | -1.0315 |
| 1452655_at   | Zdhhc2        | zinc finger, DHHC domain containing 2                                  | BB224658  | 5.5812  | 6.6129  | -1.0317 |
| 1418408_at   | Zfand1        | zinc finger, AN1-type domain 1                                         | NM_025512 | 6.5971  | 7.6294  | -1.0323 |
| 1441696_at   |               |                                                                        | AW552696  | 4.4196  | 5.4526  | -1.0330 |
| 1424014_at   | 2900092E17Rik | RIKEN cDNA 2900092E17 gene                                             | BC003932  | 7.4935  | 8.5270  | -1.0335 |
| 1429376_s_at | Anapc10       | anaphase promoting complex subunit 10                                  | BF322051  | 9.0431  | 10.0770 | -1.0339 |
| 1429284_at   | Mob3b         | MOB kinase activator 3B                                                | BB248684  | 6.5424  | 7.5765  | -1.0341 |
| 1428670_at   | 2610305J24Rik | RIKEN cDNA 2610305J24 gene                                             | AW215497  | 8.7343  | 9.7685  | -1.0342 |
| 1449125_at   | Tnfaip81      | tumor necrosis factor, alpha-induced protein 8-like 1                  | NM_025566 | 7.6470  | 8.6814  | -1.0344 |
| 1428224_at   | Hnrpd1        | heterogeneous nuclear ribonucleoprotein D-like                         | AV101245  | 7.6454  | 8.6808  | -1.0354 |
| 1450899_at   | Nedd1         | neural precursor cell expressed, developmentally down-regulated gene 1 | BB829652  | 8.0401  | 9.0765  | -1.0364 |
| 1424213_at   | Ubiad1        | UbiA prenyltransferase domain containing 1                             | BC015303  | 6.6949  | 7.7316  | -1.0367 |
| 1445161_at   | Usp6nl        | USP6 N-terminal like                                                   | BE952061  | 8.0726  | 9.1095  | -1.0369 |
| 1422452_at   | Bag3          | BCL2-associated athanogene 3                                           | NM_013863 | 9.2112  | 10.2489 | -1.0377 |
| 1449618_s_at | 2900092E17Rik | RIKEN cDNA 2900092E17 gene                                             | C77040    | 8.5845  | 9.6223  | -1.0378 |
| 1449626_s_at | Acbd4         | acyl-Coenzyme A binding domain containing 4                            | AI849317  | 6.7836  | 7.8215  | -1.0379 |
| 1436357_at   | Gm10374       | predicted gene 10374                                                   | AI875680  | 7.1177  | 8.1559  | -1.0382 |
| 1454301_at   | 2900073C17Rik | RIKEN cDNA 2900073C17 gene                                             | BB532219  | 6.5268  | 7.5651  | -1.0382 |
| 1450851_at   | Wdr1          | WD repeat domain 1                                                     | AK004644  | 10.5235 | 11.5620 | -1.0385 |
| 1451130_at   | Use1          | unconventional SNARE in the ER 1 homolog ( <i>S. cerevisiae</i> )      | AF353245  | 9.5530  | 10.5919 | -1.0389 |
| 1439845_at   | Hp1bp3        | heterochromatin protein 1, binding protein 3                           | BQ174438  | 6.9009  | 7.9398  | -1.0389 |
| 1439976_at   | Alg11         | asparagine-linked glycosylation 11 (alpha-1,2-mannosyltransferase)     | AV319509  | 5.8297  | 6.8688  | -1.0391 |
| 1453036_at   | 5430439M09Rik | RIKEN cDNA 5430439M09 gene                                             | BG069520  | 6.0646  | 7.1037  | -1.0391 |
| 1416634_at   | Fam96a        | family with sequence similarity 96, member A                           | NM_026635 | 9.5069  | 10.5466 | -1.0397 |
| 1419688_at   | Gpc6          | glypican 6                                                             | BC023448  | 7.4140  | 8.4537  | -1.0397 |
| 1429940_at   | Cdc73         | cell division cycle 73, Paf1/RNA polymerase II complex component       | BM935271  | 6.3020  | 7.3417  | -1.0397 |
| 1416820_at   | Cdc37         | cell division cycle 37                                                 | AK013255  | 6.0777  | 7.1176  | -1.0399 |
| 1426253_at   | Pacrgl        | PARK2 co-regulated-like                                                | BC018481  | 7.3498  | 8.3902  | -1.0404 |
| 1457758_at   | Eny2          | enhancer of yellow 2 homolog ( <i>Drosophila</i> )                     | BB055459  | 4.4791  | 5.5196  | -1.0405 |
| 1452997_at   | 2610005L07Rik | cadherin 11 pseudogene                                                 | BE692399  | 10.3360 | 11.3770 | -1.0410 |
| 1424227_at   | Polr3h        | polymerase (RNA) III (DNA directed) polypeptide H                      | AK019868  | 9.7930  | 10.8340 | -1.0410 |
| 1449000_at   | D10Jhu81e     | DNA segment, Chr 10, Johns Hopkins University 81 expressed             | NM_138601 | 8.5074  | 9.5486  | -1.0412 |
| 1421217_a_at | Lgals9        | lectin, galactose binding, soluble 9                                   | NM_010708 | 8.5732  | 9.6145  | -1.0413 |
| 1460694_s_at | Svil          | supervillin                                                            | BM203457  | 8.3378  | 9.3792  | -1.0414 |
| 1428090_at   | Ptcd3         | pentatricopeptide repeat domain 3                                      | AK013131  | 9.6220  | 10.6635 | -1.0415 |
| 1434859_at   | Umps          | uridine monophosphate synthetase                                       | BB127793  | 8.1235  | 9.1655  | -1.0420 |
| 1438445_at   | Lrrc8e        | leucine rich repeat containing 8 family, member E                      | BF580440  | 7.3970  | 8.4397  | -1.0427 |
| 1428132_at   | Cdc42se1      | CDC42 small effector 1                                                 | AK008084  | 7.0292  | 8.0726  | -1.0434 |
| 1418973_at   | Blzf1         | basic leucine zipper nuclear factor 1                                  | AK006544  | 7.0061  | 8.0495  | -1.0434 |
| 1436541_at   | 2310008H09Rik | RIKEN cDNA 2310008H09 gene                                             | BB452927  | 7.2263  | 8.2697  | -1.0434 |
| 1452220_at   | Dock1         | dedicator of cytokinesis 1                                             | BQ175788  | 9.5240  | 10.5682 | -1.0442 |
| 1455746_at   | Kif13a        | kinesin family member 13A                                              | BF166390  | 8.4357  | 9.4799  | -1.0442 |
| 1435592_at   | Eif5b         | eukaryotic translation initiation factor 5B                            | BB149997  | 5.8297  | 6.8742  | -1.0445 |
| 1455687_at   | Ick           | intestinal cell kinase                                                 | BB376918  | 4.2823  | 5.3271  | -1.0448 |
| 1434675_at   | Zfp763        | zinc finger protein 763                                                | BB442939  | 6.2968  | 7.3417  | -1.0449 |
| 1451185_at   | Sf3b5         | splicing factor 3b, subunit 5                                          | BC006603  | 10.6217 | 11.6668 | -1.0451 |
| 1425031_at   | Fktn          | fukutin                                                                | AB077383  | 7.4055  | 8.4507  | -1.0452 |
| 1435135_at   | Nceh1         | arylacetamide deacetylase-like 1                                       | AV369935  | 8.5165  | 9.5620  | -1.0455 |
| 1448734_at   | Cp            | ceruloplasmin                                                          | BB332449  | 8.1606  | 9.2067  | -1.0461 |
| 1428261_at   | Ccdc134       | coiled-coil domain containing 134                                      | AK009756  | 6.9682  | 8.0150  | -1.0469 |

|              |               |                                                                                         |           |         |         |         |
|--------------|---------------|-----------------------------------------------------------------------------------------|-----------|---------|---------|---------|
| 1430650_at   | Zfp191        | zinc finger protein 191                                                                 | AI504586  | 6.2005  | 7.2474  | -1.0469 |
| 1437217_at   | Ankrd6        | ankyrin repeat domain 6                                                                 | BM225135  | 5.8297  | 6.8766  | -1.0469 |
| 1448209_a_at | Slc22a17      | solute carrier family 22 (organic cation transporter), member 17                        | NM_021551 | 7.2050  | 8.2521  | -1.0471 |
| 1435545_at   | BC032203      | cDNA sequence BC032203                                                                  | BB242234  | 7.2935  | 8.3408  | -1.0473 |
| 1437599_at   |               |                                                                                         | BM246546  | 3.9632  | 5.0107  | -1.0475 |
| 1434831_a_at | Foxo3         | forkhead box O3                                                                         | BB364488  | 8.6007  | 9.6484  | -1.0477 |
| 1426188_s_at | BC005685      | cDNA sequence BC005685                                                                  | D44443    | 5.5401  | 6.5881  | -1.0480 |
| 1423891_at   | Gstt3         | glutathione S-transferase, theta 3                                                      | BC003903  | 4.2566  | 5.3054  | -1.0488 |
| 1436158_at   | Eif4ebp2      | eukaryotic translation initiation factor 4E binding protein 2                           | BI453292  | 8.5426  | 9.5916  | -1.0490 |
| 1444851_at   |               |                                                                                         | BG067231  | 4.7918  | 5.8413  | -1.0495 |
| 1424259_at   | Lmf1          | lipase maturation factor 1                                                              | BC020104  | 6.2831  | 7.3328  | -1.0497 |
| 1435280_at   | Pde4d         | phosphodiesterase 4D, cAMP specific                                                     | BB303582  | 5.4771  | 6.5268  | -1.0497 |
| 1460203_at   | Itpr1         | inositol 1,4,5-trisphosphate receptor 1                                                 | NM_010585 | 7.7740  | 8.8248  | -1.0508 |
| 1458403_at   | Tnik          | TRAF2 and NCK interacting kinase                                                        | BB222494  | 4.2695  | 5.3207  | -1.0512 |
| 1452152_at   | Clint1        | clathrin interactor 1                                                                   | AW537616  | 10.7018 | 11.7533 | -1.0515 |
| 1448618_at   | Mvp           | major vault protein                                                                     | NM_080638 | 7.9052  | 8.9568  | -1.0516 |
| 1416637_at   | Slc4a2        | solute carrier family 4 (anion exchanger), member 2                                     | NM_009207 | 7.1562  | 8.2083  | -1.0521 |
| 1451564_at   | Parp14        | poly (ADP-ribose) polymerase family, member 14                                          | BC021340  | 7.6023  | 8.6549  | -1.0526 |
| 1440974_at   | 9030203C11Rik | RIKEN cDNA 9030203C11 gene                                                              | BB242458  | 5.6036  | 6.6564  | -1.0528 |
| 1438181_x_at | Tm2d2         | TM2 domain containing 2                                                                 | BB302809  | 7.9929  | 9.0459  | -1.0530 |
| 1431364_a_at |               |                                                                                         | BC026878  | 5.7781  | 6.8313  | -1.0532 |
| 1424084_at   | Rod1          | ROD1 regulator of differentiation 1 (S. pombe)                                          | BB519382  | 5.8155  | 6.8688  | -1.0533 |
| 1437747_at   | Ube4a         | ubiquitination factor E4A, UFD2 homolog (S. cerevisiae)                                 | AV174768  | 5.4771  | 6.5311  | -1.0540 |
| 1437917_at   | D530037H12Rik | RIKEN cDNA D530037H12 gene                                                              | BG066910  | 5.7515  | 6.8057  | -1.0542 |
| 1423990_at   | Rab28         | RAB28, member RAS oncogene family                                                       | BC004580  | 10.3707 | 11.4253 | -1.0546 |
| 1423315_at   | Bbc3          | BCL2 binding component 3                                                                | AW489168  | 6.6814  | 7.7362  | -1.0547 |
| 1443721_x_at | Sbno2         | strawberry notch homolog 2 (Drosophila)                                                 | BF148215  | 6.1404  | 7.1952  | -1.0548 |
| 1435587_at   | Pcid2         | PCI domain containing 2                                                                 | BB309550  | 6.3915  | 7.4472  | -1.0557 |
| 1435719_at   | AI448984      | expressed sequence AI448984                                                             | BM935216  | 5.6376  | 6.6941  | -1.0565 |
| 1441975_at   | Acpp          | acid phosphatase, prostate                                                              | BB008092  | 4.4937  | 5.5508  | -1.0571 |
| 1427199_at   | Fryl          | furry homolog-like (Drosophila)                                                         | BM118442  | 7.8087  | 8.8659  | -1.0572 |
| 1452302_at   | Arhgef10      | Rho guanine nucleotide exchange factor (GEF) 10                                         | AV345051  | 5.8877  | 6.9450  | -1.0572 |
| 1426743_at   | Appl2         | adaptor protein, phosphotyrosine interaction, PH domain and leucine zipper containing 2 | BC002232  | 9.4454  | 10.5028 | -1.0574 |
| 1420984_at   | Pctp          | phosphatidylcholine transfer protein                                                    | AF114437  | 4.7207  | 5.7781  | -1.0574 |
| 1429448_s_at | Tet1          | tet methylcytosine dioxygenase 1                                                        | BM240219  | 4.5828  | 5.6402  | -1.0575 |
| 1434690_at   | Lclat1        | lysocardiolipin acyltransferase 1                                                       | BM237177  | 9.5350  | 10.5930 | -1.0579 |
| 1425186_at   | Lmbrd1        | LMBR1 domain containing 1                                                               | BM206793  | 6.0698  | 7.1280  | -1.0582 |
| 1418109_at   | Gspt2         | G1 to S phase transition 2                                                              | NM_008179 | 7.4224  | 8.4806  | -1.0582 |
| 1440195_at   | Serbp1        | serpine1 mRNA binding protein 1                                                         | BB077926  | 6.2832  | 7.3417  | -1.0586 |
| 1426693_x_at | Cox15         | COX15 homolog, cytochrome c oxidase assembly protein (yeast)                            | BC021498  | 7.9926  | 9.0513  | -1.0588 |
| 1455339_at   | Fkbp15        | FK506 binding protein 15                                                                | BG094421  | 7.3681  | 8.4271  | -1.0590 |
| 1427289_at   | Ddhd1         | DDHD domain containing 1                                                                | AV265534  | 4.0372  | 5.0970  | -1.0598 |
| 1438331_at   |               |                                                                                         | BB491630  | 4.7783  | 5.8382  | -1.0598 |
| 1426244_at   | Mapre2        | microtubule-associated protein, RP/EB family, member 2                                  | BC027056  | 5.6704  | 6.7310  | -1.0607 |
| 1451575_a_at | Nudt3         | nudix (nucleotide diphosphate linked moiety X)-type motif 3                             | BC016534  | 9.4890  | 10.5497 | -1.0607 |
| 1442735_at   |               |                                                                                         | BM941420  | 4.2237  | 5.2849  | -1.0612 |
| 1433505_a_at | Lrrc8d        | leucine rich repeat containing 8D                                                       | BB315861  | 8.3422  | 9.4035  | -1.0612 |
| 1457529_x_at |               |                                                                                         | BB066943  | 5.3624  | 6.4242  | -1.0617 |
| 1439105_at   | Cdadc1        | cytidine and dCMP deaminase domain containing 1                                         | BE200391  | 5.1383  | 6.2005  | -1.0622 |
| 1452963_at   | 9530077C05Rik | RIKEN cDNA 9530077C05 gene                                                              | AK003384  | 5.1383  | 6.2005  | -1.0622 |
| 1460546_at   | Lgi3          | leucine-rich repeat LGI family, member 3                                                | BB187947  | 5.4546  | 6.5179  | -1.0633 |
| 1452858_at   | Elavl1        | ELAV (embryonic lethal, abnormal vision)-like 1 (Hu antigen R)                          | BB003384  | 7.7042  | 8.7678  | -1.0636 |
| 1434093_at   | Lysmd4        | LysM, putative peptidoglycan-binding, domain containing 4                               | AV376944  | 4.8719  | 5.9357  | -1.0638 |
| 1418222_at   | Noa1          | nitric oxide associated 1                                                               | NM_019836 | 8.7058  | 9.7702  | -1.0644 |
| 1436941_at   | Nxpe3         | neurexophilin and PC-esterase domain family, member 3                                   | BB626288  | 7.5990  | 8.6637  | -1.0647 |

|              |               |                                                                                             |           |         |         |         |
|--------------|---------------|---------------------------------------------------------------------------------------------|-----------|---------|---------|---------|
| 1424611_x_at | Trub2         | TruB pseudouridine (psi) synthase homolog 2 (E. coli)                                       | BG064045  | 7.8447  | 8.9095  | -1.0648 |
| 1438093_x_at | Dbi           | diazepam binding inhibitor                                                                  | BB115327  | 9.9426  | 11.0076 | -1.0650 |
| 1437041_at   | Sfrs18        | serine/arginine-rich splicing factor 18                                                     | BB120903  | 8.1114  | 9.1764  | -1.0651 |
| 1439103_at   | Cdc73         | cell division cycle 73, Paf1/RNA polymerase II complex component                            | BB183750  | 5.6970  | 6.7621  | -1.0651 |
| 1429962_at   | Cebpz         | CCAAT/enhancer binding protein zeta                                                         | AK017537  | 5.1546  | 6.2200  | -1.0654 |
| 1455173_at   | Gspt1         | G1 to S phase transition 1                                                                  | AW537663  | 7.7804  | 8.8461  | -1.0658 |
| 1434281_at   | Dda1          | DET1 and DDB1 associated 1                                                                  | AV032244  | 8.6919  | 9.7580  | -1.0661 |
| 1452087_at   | Epsti1        | epithelial stromal interaction 1 (breast)                                                   | BF020640  | 5.0115  | 6.0777  | -1.0662 |
| 1453863_at   | 3300002P09Rik | RIKEN cDNA 3300002P09 gene                                                                  | AI430424  | 4.1251  | 5.1918  | -1.0667 |
| 1442148_at   | Psip1         | PC4 and SFRS1 interacting protein 1                                                         | BB074968  | 7.7902  | 8.8571  | -1.0668 |
| 1422930_at   | Icam4         | intercellular adhesion molecule 4, Landsteiner-Wiener blood group                           | NM_023892 | 5.0107  | 6.0777  | -1.0670 |
| 1455179_at   | Mpp7          | membrane protein, palmitoylated 7 (MAGUK p55 subfamily member 7)                            | BG066186  | 6.0047  | 7.0719  | -1.0672 |
| 1416375_at   | Ap3m1         | adaptor-related protein complex 3, mu 1 subunit                                             | AF242857  | 6.1001  | 7.1687  | -1.0686 |
| 1416945_at   | Ptov1         | prostate tumor over expressed gene 1                                                        | NM_133949 | 8.3312  | 9.3999  | -1.0687 |
| 1416551_at   | Atp2a2        | ATPase, Ca <sup>++</sup> transporting, cardiac muscle, slow twitch 2                        | NM_009722 | 8.5438  | 9.6126  | -1.0688 |
| 1459741_x_at | Ucp2          | uncoupling protein 2 (mitochondrial, proton carrier)                                        | AW108044  | 6.5258  | 7.5951  | -1.0693 |
| 1428570_at   | Ccnc          | cyclin C                                                                                    | AK009615  | 7.7111  | 8.7804  | -1.0694 |
| 1426992_at   | Xpr1          | xenotropic and polytropic retrovirus receptor 1                                             | AV337591  | 7.7180  | 8.7875  | -1.0695 |
| 1459590_at   |               |                                                                                             | BE980204  | 4.4196  | 5.4892  | -1.0696 |
| 1417009_at   | C1ra          | complement component 1, r subcomponent A                                                    | NM_023143 | 6.6204  | 7.6903  | -1.0699 |
| 1421381_a_at | Col9a1        | collagen, type IX, alpha 1                                                                  | NM_007740 | 5.8632  | 6.9332  | -1.0700 |
| 1426461_at   | Ugp2          | UDP-glucose pyrophosphorylase 2                                                             | AI788759  | 7.2147  | 8.2848  | -1.0701 |
| 1416137_at   | Anxa7         | annexin A7                                                                                  | BC008997  | 7.1217  | 8.1925  | -1.0708 |
| 1434517_at   | Wdfy2         | WD repeat and FYVE domain containing 2                                                      | BB794924  | 6.9450  | 8.0161  | -1.0712 |
| 1417599_at   | Cd276         | CD276 antigen                                                                               | NM_133983 | 7.3417  | 8.4141  | -1.0724 |
| 1456684_at   | Tmem74        | transmembrane protein 74                                                                    | BB710790  | 7.7541  | 8.8272  | -1.0732 |
| 1427940_s_at | Mycbp         | c-myc binding protein                                                                       | BB046347  | 6.7003  | 7.7740  | -1.0736 |
| 1426896_at   | Zfp191        | zinc finger protein 191                                                                     | BB579760  | 6.5424  | 7.6166  | -1.0742 |
| 1426696_at   | Lrpap1        | low density lipoprotein receptor-related protein associated protein 1                       | D00622    | 7.9631  | 9.0377  | -1.0745 |
| 1448856_a_at | Msra          | methionine sulfoxide reductase A                                                            | NM_026322 | 5.9051  | 6.9797  | -1.0746 |
| 1456128_at   | Atp5g2        | ATP synthase, H <sup>+</sup> transporting, mitochondrial F0 complex, subunit C2 (subunit 9) | AW413339  | 5.3972  | 6.4720  | -1.0748 |
| 1424025_at   | Ginm1         | glycoprotein integral membrane 1                                                            | BC013529  | 7.9804  | 9.0557  | -1.0752 |
| 1455751_at   | Cand1         | cullin associated and neddylation disassociated 1                                           | BB770361  | 5.5372  | 6.6129  | -1.0757 |
| 1447223_at   |               |                                                                                             | AW120584  | 6.8781  | 7.9542  | -1.0761 |
| 1431190_x_at | Fahd2a        | fumarylacetoacetate hydrolase domain containing 2A                                          | BI872590  | 6.6479  | 7.7248  | -1.0769 |
| 1434521_at   | Rfx7          | regulatory factor X, 7                                                                      | BB148972  | 8.2662  | 9.3435  | -1.0773 |
| 1452973_at   | Ppm1k         | protein phosphatase 1K (PP2C domain containing)                                             | AK013741  | 7.4001  | 8.4786  | -1.0785 |
| 1418039_at   | Rab13         | RAB, member of RAS oncogene family-like 3                                                   | NM_026297 | 7.6757  | 8.7545  | -1.0787 |
| 1421402_at   | Mta3          | metastasis associated 3                                                                     | NM_054082 | 6.3902  | 7.4693  | -1.0791 |
| 1437872_at   | Napepld       | N-acyl phosphatidylethanolamine phospholipase D                                             | BB325565  | 5.2306  | 6.3103  | -1.0796 |
| 1417173_at   | Atf6b         | activating transcription factor 6 beta                                                      | BC013534  | 7.7538  | 8.8335  | -1.0797 |
| 1443858_at   | Trim12c       | tripartite motif-containing 12C                                                             | BI653857  | 7.5356  | 8.6155  | -1.0799 |
| 1420674_at   | Pla2g2e       | phospholipase A2, group IIE                                                                 | NM_012044 | 4.2966  | 5.3765  | -1.0799 |
| 1424526_a_at | Tgds          | TDP-glucose 4,6-dehydratase                                                                 | BC021419  | 8.5684  | 9.6484  | -1.0800 |
| 1417590_at   | Cyp27a1       | cytochrome P450, family 27, subfamily a, polypeptide 1                                      | NM_024264 | 5.3433  | 6.4242  | -1.0809 |
| 1453058_at   | Wdr5b         | WD repeat domain 5B                                                                         | AK009247  | 4.9681  | 6.0489  | -1.0809 |
| 1435450_at   | Cpne3         | copine III                                                                                  | BB398005  | 10.1868 | 11.2679 | -1.0810 |
| 1456746_a_at | Cd99l2        | CD99 antigen-like 2                                                                         | BB334959  | 6.7124  | 7.7936  | -1.0812 |
| 1435299_at   | Cdk7          | cyclin-dependent kinase 7                                                                   | BB761538  | 6.5424  | 7.6236  | -1.0812 |
| 1423667_at   | Mat2a         | methionine adenosyltransferase II, alpha                                                    | BC003451  | 10.7238 | 11.8068 | -1.0829 |
| 1433661_at   | Nlr1          | NLR family member X1                                                                        | BB830346  | 4.7207  | 5.8041  | -1.0834 |
| 1437338_x_at | Elp3          | elongator acetyltransferase complex subunit 3                                               | BB172662  | 8.0247  | 9.1082  | -1.0835 |
| 1435402_at   | Gramd1b       | GRAM domain containing 1B                                                                   | BB066186  | 6.0649  | 7.1485  | -1.0835 |
| 1415793_at   | Pnpo          | pyridoxine 5'-phosphate oxidase                                                             | NM_134021 | 6.7252  | 7.8087  | -1.0835 |
| 1423768_at   | Unc93b1       | unc-93 homolog B1 (C. elegans)                                                              | BC018388  | 6.1114  | 7.1952  | -1.0838 |
| 1453745_at   | 2700038G22Rik | RIKEN cDNA 2700038G22 gene                                                                  | AK012332  | 7.2209  | 8.3047  | -1.0838 |



|              |               |                                                                                       |           |         |         |         |
|--------------|---------------|---------------------------------------------------------------------------------------|-----------|---------|---------|---------|
| 1443992_at   | Nipbl         | Nipped-B homolog (Drosophila)                                                         | BB203972  | 5.5580  | 6.6421  | -1.0840 |
| 1449002_at   | Phlda3        | pleckstrin homology-like domain, family A, member 3                                   | NM_013750 | 9.3357  | 10.4198 | -1.0842 |
| 1455638_at   | Zfp319        | zinc finger protein 319                                                               | BE949045  | 3.9701  | 5.0544  | -1.0843 |
| 1454158_at   | Mpp7          | membrane protein, palmitoylated 7 (MAGUK p55 subfamily member 7)                      | AK012883  | 6.1813  | 7.2656  | -1.0843 |
| 1418996_a_at | Lym5          | LYR motif containing 5                                                                | BC021522  | 8.2940  | 9.3784  | -1.0843 |
| 1460563_at   | Nus1          | nuclear undecaprenyl pyrophosphate synthase 1 homolog (S. cerevisiae)                 | BE949414  | 9.6619  | 10.7467 | -1.0848 |
| 1451148_at   | Pink1         | PTEN induced putative kinase 1                                                        | AF316872  | 8.2224  | 9.3073  | -1.0849 |
| 1455081_at   | Txn14b        | thioredoxin-like 4B                                                                   | BB492199  | 6.6054  | 7.6903  | -1.0849 |
| 1444005_at   |               |                                                                                       | AI529516  | 4.4854  | 5.5706  | -1.0852 |
| 1437050_s_at | Angel2        | angel homolog 2 (Drosophila)                                                          | AV330655  | 7.5434  | 8.6286  | -1.0852 |
| 1452661_at   | Tfrc          | transferrin receptor                                                                  | AK011596  | 9.3554  | 10.4407 | -1.0854 |
| 1434404_at   | Fam73a        | family with sequence similarity 73, member A                                          | BB375245  | 5.9648  | 7.0503  | -1.0855 |
| 1429583_at   | 2900053A13Rik | RIKEN cDNA 2900053A13 gene                                                            | BE865033  | 4.3588  | 5.4443  | -1.0856 |
| 1424289_at   | Osgin2        | oxidative stress induced growth inhibitor family member 2                             | BB817847  | 7.2684  | 8.3541  | -1.0857 |
| 1419366_at   | Zmat5         | zinc finger, matrin type 5                                                            | NM_026015 | 7.0869  | 8.1726  | -1.0858 |
| 1416390_at   | Rcbtb2        | regulator of chromosome condensation (RCC1) and BTB (POZ) domain containing protein 2 | NM_134083 | 5.3043  | 6.3902  | -1.0858 |
| 1418339_at   | Recql         | RecQ protein-like                                                                     | NM_023042 | 8.2214  | 9.3073  | -1.0859 |
| 1438478_a_at | Ppp3ca        | protein phosphatase 3, catalytic subunit, alpha isoform                               | AI313926  | 9.8997  | 10.9858 | -1.0860 |
| 1421260_a_at | Srm           | spermidine synthase                                                                   | NM_009272 | 10.8749 | 11.9618 | -1.0869 |
| 1426401_at   | Ppp3ca        | protein phosphatase 3, catalytic subunit, alpha isoform                               | BQ173889  | 9.8630  | 10.9500 | -1.0870 |
| 1458987_at   | Cdk7          | cyclin-dependent kinase 7                                                             | BE981450  | 5.4553  | 6.5424  | -1.0871 |
| 1443915_at   | Mrpl47        | mitochondrial ribosomal protein L47                                                   | BE957160  | 4.8719  | 5.9590  | -1.0872 |
| 1454980_at   | Pdpr          | pyruvate dehydrogenase phosphatase regulatory subunit                                 | BB667201  | 7.4308  | 8.5184  | -1.0876 |
| 1429582_at   | Nacc2         | nucleus accumbens associated 2, BEN and BTB (POZ) domain containing                   | BB360604  | 7.1295  | 8.2173  | -1.0877 |
| 1443466_s_at | Polr3b        | polymerase (RNA) III (DNA directed) polypeptide B                                     | C85372    | 6.5111  | 7.5990  | -1.0879 |
| 1452865_at   | Lrrc27        | leucine rich repeat containing 27                                                     | AK009798  | 4.8809  | 5.9695  | -1.0886 |
| 1457465_at   | Shroom4       | shroom family member 4                                                                | BB496399  | 7.9984  | 9.0871  | -1.0887 |
| 1422677_at   | Dgat2         | diacylglycerol O-acyltransferase 2                                                    | AK002443  | 6.4952  | 7.5840  | -1.0888 |
| 1438610_a_at | Cryz          | crystallin, zeta                                                                      | BB793369  | 9.2560  | 10.3449 | -1.0889 |
| 1424718_at   | Mapt          | microtubule-associated protein tau                                                    | M18775    | 5.2306  | 6.3197  | -1.0890 |
| 1434067_at   | AI662270      | expressed sequence AI662270                                                           | BE688410  | 8.6402  | 9.7294  | -1.0892 |
| 1450769_s_at | Stard5        | StAR-related lipid transfer (START) domain containing 5                               | BI076697  | 6.6079  | 7.6973  | -1.0893 |
| 1443281_at   | Nrcam         | neuron-glia-CAM-related cell adhesion molecule                                        | BB297094  | 5.5907  | 6.6801  | -1.0893 |
| 1428180_at   | 2810422J05Rik | RIKEN cDNA 2810422J05 gene                                                            | AK013135  | 8.2074  | 9.2972  | -1.0898 |
| 1423777_at   | Usp20         | ubiquitin specific peptidase 20                                                       | AK006800  | 6.0987  | 7.1886  | -1.0899 |
| 1453224_at   | Zfand5        | zinc finger, AN1-type domain 5                                                        | AW049828  | 6.4612  | 7.5511  | -1.0899 |
| 1435602_at   | Sephs2        | selenophosphate synthetase 2                                                          | BE200310  | 6.9605  | 8.0510  | -1.0905 |
| 1438766_at   | Pnrc2         | proline-rich nuclear receptor coactivator 2                                           | AV001197  | 5.2469  | 6.3376  | -1.0907 |
| 1422574_at   | Mxd4          | Max dimerization protein 4                                                            | BE291523  | 7.1707  | 8.2615  | -1.0908 |
| 1439869_at   | Zfp493        | zinc finger protein 493                                                               | BB326106  | 5.4680  | 6.5591  | -1.0911 |
| 1454846_at   | Utp15         | UTP15, U3 small nucleolar ribonucleoprotein, homolog (yeast)                          | AV227804  | 7.8087  | 8.9006  | -1.0919 |
| 1431055_a_at | Snx10         | sorting nexin 10                                                                      | AK010399  | 8.5895  | 9.6816  | -1.0921 |
| 1436609_a_at | Lrpap1        | low density lipoprotein receptor-related protein associated protein 1                 | AV309553  | 9.3071  | 10.3995 | -1.0924 |
| 1439030_at   | Gmppb         | GDP-mannose pyrophosphorylase B                                                       | BI410722  | 7.2621  | 8.3546  | -1.0924 |
| 1420617_at   | Cpeb4         | cytoplasmic polyadenylation element binding protein 4                                 | NM_026252 | 7.1586  | 8.2511  | -1.0925 |
| 1418163_at   | Tlr4          | toll-like receptor 4                                                                  | AF185285  | 5.8519  | 6.9448  | -1.0929 |
| 1451669_at   | Ppm1b         | protein phosphatase 1B, magnesium dependent, beta isoform                             | AJ271836  | 10.1068 | 11.1997 | -1.0929 |
| 1418670_s_at | Hspg2         | perlecan (heparan sulfate proteoglycan 2)                                             | NM_008305 | 7.8384  | 8.9314  | -1.0929 |
| 1417188_s_at | Ube2k         | ubiquitin-conjugating enzyme E2K                                                      | AI551201  | 6.2005  | 7.2937  | -1.0932 |
| 1436120_at   | Setdb2        | SET domain, bifurcated 2                                                              | AW552579  | 7.5216  | 8.6155  | -1.0938 |
| 1446318_at   |               |                                                                                       | BB273207  | 3.9701  | 5.0640  | -1.0939 |
| 1423458_at   | Slc35a5       | solute carrier family 35, member A5                                                   | BB778934  | 5.1063  | 6.2005  | -1.0941 |
| 1459832_s_at | Ap1m1         | adaptor-related protein complex AP-1, mu subunit 1                                    | BB433211  | 9.3849  | 10.4793 | -1.0944 |
| 1453255_at   | Slc43a1       | solute carrier family 43, member 1                                                    | AK011417  | 5.4108  | 6.5058  | -1.0950 |

|              |               |                                                                                     |           |         |         |         |
|--------------|---------------|-------------------------------------------------------------------------------------|-----------|---------|---------|---------|
| 1429410_at   | Eny2          | enhancer of yellow 2 homolog (Drosophila)                                           | AI595744  | 6.5111  | 7.6064  | -1.0953 |
| 1455079_at   | Dcun1d4       | DCN1, defective in cullin neddylation 1, domain containing 4 (S. cerevisiae)        | BQ176904  | 6.8130  | 7.9086  | -1.0956 |
| 1437290_at   | Impad1        | inositol monophosphatase domain containing 1                                        | BG797423  | 8.3078  | 9.4035  | -1.0957 |
| 1428829_at   | Dennd1b       | DENN/MADD domain containing 1B                                                      | AK018353  | 8.5788  | 9.6746  | -1.0958 |
| 1440745_at   | Prdm16        | PR domain containing 16                                                             | BB796293  | 4.7423  | 5.8382  | -1.0958 |
| 1454885_at   | Zfp141        | zinc finger protein 141                                                             | BM211194  | 5.3443  | 6.4409  | -1.0965 |
| 1423045_at   | Ncbp2         | nuclear cap binding protein subunit 2                                               | BE285362  | 8.0327  | 9.1298  | -1.0971 |
| 1429878_a_at | Nupl1         | nucleoporin like 1                                                                  | AK006062  | 5.3765  | 6.4737  | -1.0972 |
| 1436089_at   | Ints6         | integrator complex subunit 6                                                        | BB401056  | 7.0245  | 8.1217  | -1.0972 |
| 1417395_at   | Klf4          | Kruppel-like factor 4 (gut)                                                         | BG069413  | 9.4862  | 10.5838 | -1.0976 |
| 1438081_at   | Mcc           | mutated in colorectal cancers                                                       | BB794635  | 7.8087  | 8.9065  | -1.0978 |
| 1450767_at   | Nedd9         | neural precursor cell expressed, developmentally down-regulated gene 9              | NM_017464 | 6.2438  | 7.3417  | -1.0979 |
| 1434806_at   | Mtx3          | metaxin 3                                                                           | AU067765  | 6.3729  | 7.4709  | -1.0980 |
| 1416897_at   | Parp9         | poly (ADP-ribose) polymerase family, member 9                                       | NM_030253 | 8.7725  | 9.8708  | -1.0983 |
| 1442308_at   | Smyd4         | SET and MYND domain containing 4                                                    | AW538800  | 6.9578  | 8.0564  | -1.0986 |
| 1421633_a_at | Hapln1        | hyaluronan and proteoglycan link protein 1                                          | NM_013500 | 4.1151  | 5.2136  | -1.0986 |
| 1448270_at   | Ddx21         | DEAD (Asp-Glu-Ala-Asp) box polypeptide 21                                           | BM246099  | 9.1012  | 10.2000 | -1.0988 |
| 1428131_a_at | Cdc42se1      | CDC42 small effector 1                                                              | AK008084  | 9.3771  | 10.4763 | -1.0992 |
| 1420124_s_at | Tcta          | T cell leukemia translocation altered gene                                          | C85065    | 5.9508  | 7.0503  | -1.0995 |
| 1446968_at   | Picalm        | phosphatidylinositol binding clathrin assembly protein                              | BB500561  | 4.2058  | 5.3054  | -1.0996 |
| 1419470_at   | Gnb4          | guanine nucleotide binding protein (G protein), beta 4                              | BI713933  | 9.3190  | 10.4188 | -1.0998 |
| 1448814_at   | Gab1          | growth factor receptor bound protein 2-associated protein 1                         | NM_021356 | 4.1306  | 5.2306  | -1.1000 |
| 1417060_at   | Ppp1r11       | protein phosphatase 1, regulatory (inhibitor) subunit 11                            | NM_029632 | 7.5840  | 8.6849  | -1.1009 |
| 1436222_at   | Gas5          | growth arrest specific 5                                                            | AW547050  | 8.9431  | 10.0442 | -1.1011 |
| 1416936_at   | Aatk          | apoptosis-associated tyrosine kinase                                                | NM_007377 | 6.3015  | 7.4027  | -1.1012 |
| 1456388_at   | Atp11a        | ATPase, class VI, type 11A                                                          | AV378604  | 7.8749  | 8.9769  | -1.1019 |
| 1449509_at   | Serf1         | small EDRK-rich factor 1                                                            | NM_011353 | 7.4325  | 8.5348  | -1.1023 |
| 1425323_a_at | Fam173a       | family with sequence similarity 173, member A                                       | BC008155  | 9.7169  | 10.8193 | -1.1024 |
| 1433658_x_at | Pcbp4         | poly(rC) binding protein 4                                                          | AV300794  | 9.8481  | 10.9507 | -1.1027 |
| 1434480_at   | Pdpr          | pyruvate dehydrogenase phosphatase regulatory subunit                               | BB667201  | 7.5483  | 8.6518  | -1.1035 |
| 1452146_a_at | Cox15         | COX15 homolog, cytochrome c oxidase assembly protein (yeast)                        | BC021498  | 7.6928  | 8.7973  | -1.1045 |
| 1423909_at   | Tmem176a      | transmembrane protein 176A                                                          | BC010831  | 8.8070  | 9.9117  | -1.1048 |
| 1424755_at   | Hip1          | huntingtin interacting protein 1                                                    | BB320674  | 6.5195  | 7.6246  | -1.1051 |
| 1448227_at   | Grb7          | growth factor receptor bound protein 7                                              | NM_010346 | 5.6390  | 6.7442  | -1.1052 |
| 1451571_s_at |               |                                                                                     | BC010442  | 6.2541  | 7.3594  | -1.1053 |
| 1459869_x_at | Pdpr          | pyruvate dehydrogenase phosphatase regulatory subunit                               | BB079116  | 8.0826  | 9.1895  | -1.1069 |
| 1417169_at   | Usp2          | ubiquitin specific peptidase 2                                                      | AI553394  | 6.4839  | 7.5915  | -1.1077 |
| 1416398_at   | Mesdc1        | mesoderm development candidate 1                                                    | BB474887  | 4.2333  | 5.3414  | -1.1081 |
| 1415964_at   | Scd1          | stearoyl-Coenzyme A desaturase 1                                                    | NM_009127 | 11.1902 | 12.2983 | -1.1081 |
| 1457376_at   |               |                                                                                     | BM238390  | 3.9024  | 5.0107  | -1.1083 |
| 1424015_at   | Dennd5a       | DENN/MADD domain containing 5A                                                      | BC022119  | 10.8955 | 12.0039 | -1.1084 |
| 1444934_at   | Zfp276        | zinc finger protein (C2H2 type) 276                                                 | BG067063  | 6.0989  | 7.2077  | -1.1088 |
| 1416151_at   | Srsf3         | serine/arginine-rich splicing factor 3                                              | NM_013663 | 8.5853  | 9.6944  | -1.1091 |
| 1441751_at   | AW493563      | expressed sequence AW493563                                                         | BE947079  | 3.9089  | 5.0190  | -1.1101 |
| 1452190_at   | Prcp          | prolylcarboxypeptidase (angiotensinase C)                                           | AK011112  | 6.8645  | 7.9747  | -1.1102 |
| 1449947_s_at | Zfhx3         | zinc finger homeobox 3                                                              | NM_007496 | 8.7754  | 9.8859  | -1.1106 |
| 1423924_s_at | Tspan14       | tetraspanin 14                                                                      | BC025568  | 9.3668  | 10.4775 | -1.1107 |
| 1428490_at   | C1galt1       | core 1 synthase, glycoprotein-N-acetylgalactosamine 3-beta-galactosyltransferase, 1 | AK008884  | 7.5562  | 8.6673  | -1.1111 |
| 1444779_s_at | Zfp59         | zinc finger protein 59                                                              | BE985246  | 5.6110  | 6.7223  | -1.1112 |
| 1417049_at   | Rhd           | Rh blood group, D antigen                                                           | AF069311  | 6.5925  | 7.7042  | -1.1117 |
| 1431751_a_at | Mpped2        | metallophosphoesterase domain containing 2                                          | AK012553  | 4.1750  | 5.2869  | -1.1120 |
| 1428780_at   | Tha1          | threonine aldolase 1                                                                | AK005036  | 4.9866  | 6.0989  | -1.1123 |
| 1438024_at   | Ccdc90a       | coiled-coil domain containing 90A                                                   | AW554392  | 9.0892  | 10.2020 | -1.1128 |
| 1434398_at   | Nkrf          | NF-kappaB repressing factor                                                         | BB396674  | 7.9578  | 9.0711  | -1.1133 |
| 1440587_at   |               |                                                                                     | BM238838  | 4.3299  | 5.4443  | -1.1144 |
| 1454998_at   | 120001118Rik  | RIKEN cDNA 120001118 gene                                                           | BM225303  | 7.9135  | 9.0281  | -1.1147 |
| 1433726_at   | 2310035C23Rik | RIKEN cDNA 2310035C23 gene                                                          | BB124070  | 8.3203  | 9.4350  | -1.1147 |
| 1449853_at   | Sfxn2         | sideroflexin 2                                                                      | NM_053196 | 6.5798  | 7.6945  | -1.1147 |

|              |               |                                                                          |           |         |         |         |
|--------------|---------------|--------------------------------------------------------------------------|-----------|---------|---------|---------|
| 1455437_at   | Sik3          | SIK family kinase 3                                                      | AV369969  | 8.4890  | 9.6040  | -1.1150 |
| 1426347_at   | 2010321M09Rik | RIKEN cDNA 2010321M09 gene                                               | BM120802  | 8.0956  | 9.2110  | -1.1154 |
| 1439165_at   | Gm20199       | predicted gene, 20199                                                    | BF713980  | 4.7227  | 5.8382  | -1.1155 |
| 1422128_at   | Rpl14         | ribosomal protein L14                                                    | NM_025974 | 7.5866  | 8.7023  | -1.1158 |
| 1455393_at   | Cp            | ceruloplasmin                                                            | BB009037  | 6.8564  | 7.9729  | -1.1165 |
| 1429958_x_at | Haghl         | hydroxyacylglutathione hydrolase-like                                    | BI790001  | 8.0191  | 9.1359  | -1.1168 |
| 1450687_at   | Igf2bp3       | insulin-like growth factor 2 mRNA binding protein 3                      | NM_023670 | 5.8040  | 6.9213  | -1.1173 |
| 1460320_at   | Becn1         | beclin 1, autophagy related                                              | NM_019584 | 9.6532  | 10.7711 | -1.1179 |
| 1425798_a_at | Recql         | RecQ protein-like                                                        | AB017105  | 7.2244  | 8.3426  | -1.1182 |
| 1417723_at   | Ube2j1        | ubiquitin-conjugating enzyme E2J 1                                       | NM_019586 | 9.1621  | 10.2804 | -1.1183 |
| 1435426_s_at |               |                                                                          | AV212090  | 5.3054  | 6.4242  | -1.1188 |
| 1458627_at   | Sip1          | survival of motor neuron protein interacting protein 1                   | AW701164  | 5.3054  | 6.4242  | -1.1188 |
| 1420390_s_at | Zfp354a       | zinc finger protein 354A                                                 | NM_009329 | 4.5215  | 5.6402  | -1.1188 |
| 1428823_at   | Hddc2         | HD domain containing 2                                                   | AK009957  | 7.6050  | 8.7241  | -1.1191 |
| 1431932_s_at | Trim44        | tripartite motif-containing 44                                           | AK015519  | 5.7245  | 6.8439  | -1.1194 |
| 1451956_a_at | Sigmar1       | sigma non-opioid intracellular receptor 1                                | AF226605  | 7.4308  | 8.5503  | -1.1195 |
| 1434424_at   | Mfsd7b        | major facilitator superfamily domain containing 7B                       | BB276950  | 8.6007  | 9.7219  | -1.1212 |
| 1434768_at   | Tpp1          | tripeptidyl peptidase I                                                  | AI266910  | 7.7058  | 8.8272  | -1.1214 |
| 1437289_at   | Impad1        | inositol monophosphatase domain containing 1                             | BG797423  | 9.5931  | 10.7153 | -1.1222 |
| 1451509_at   | Taf9          | TAF9 RNA polymerase II, TATA box binding protein (TBP)-associated factor | BC019453  | 9.7702  | 10.8927 | -1.1225 |
| 1419851_at   | Slc4a8        | solute carrier family 4 (anion exchanger), member 8                      | W13854    | 4.2537  | 5.3765  | -1.1228 |
| 1460194_at   | Phyh          | phytanoyl-CoA hydroxylase                                                | NM_010726 | 6.8875  | 8.0105  | -1.1230 |
| 1426940_at   | Sidt2         | SID1 transmembrane family, member 2                                      | BI412808  | 7.7833  | 8.9065  | -1.1232 |
| 1426643_at   | Elp3          | elongator acetyltransferase complex subunit 3                            | AK012072  | 8.5630  | 9.6863  | -1.1232 |
| 1423965_at   | Cd99l2        | CD99 antigen-like 2                                                      | BB038546  | 7.6740  | 8.7973  | -1.1233 |
| 1439135_at   |               |                                                                          | BB129618  | 4.3535  | 5.4771  | -1.1236 |
| 1454801_at   | Ankrd28       | ankyrin repeat domain 28                                                 | BG066840  | 8.6837  | 9.8077  | -1.1240 |
| 1423806_at   | Ints4         | integrator complex subunit 4                                             | BC013813  | 7.5278  | 8.6518  | -1.1240 |
| 1420611_at   | Prkacb        | protein kinase, cAMP dependent, catalytic, beta                          | AV024339  | 9.4476  | 10.5720 | -1.1243 |
| 1449576_at   | Eif1ax        | eukaryotic translation initiation factor 1A, X-linked                    | NM_025437 | 8.2986  | 9.4232  | -1.1246 |
| 1452608_at   | Mycbp         | c-myc binding protein                                                    | BB046347  | 7.3695  | 8.4940  | -1.1246 |
| 1460331_at   | Tm9sf2        | transmembrane 9 superfamily member 2                                     | BB747462  | 9.8369  | 10.9617 | -1.1248 |
| 1423100_at   | Fos           | FBJ osteosarcoma oncogene                                                | AV026617  | 10.6425 | 11.7673 | -1.1248 |
| 1435185_at   | Lrrcc1        | leucine rich repeat and coiled-coil domain containing 1                  | BF466265  | 4.9601  | 6.0851  | -1.1250 |
| 1427178_at   | Tmc4          | transmembrane channel-like gene family 4                                 | BB667469  | 5.8315  | 6.9566  | -1.1251 |
| 1449749_s_at | Tfb1m         | transcription factor B1, mitochondrial                                   | AI429207  | 7.4211  | 8.5464  | -1.1253 |
| 1450672_a_at |               |                                                                          | NM_011637 | 6.7950  | 7.9206  | -1.1256 |
| 1439073_at   | Zfp160        | zinc finger protein 160                                                  | BB821719  | 4.9228  | 6.0489  | -1.1261 |
| 1420621_a_at | App           | amyloid beta (A4) precursor protein                                      | NM_007471 | 9.5565  | 10.6832 | -1.1267 |
| 1435974_at   | Arhgef9       | CDC42 guanine nucleotide exchange factor (GEF) 9                         | BB271482  | 3.9701  | 5.0970  | -1.1268 |
| 1423765_at   | Ath1          | ATH1, acid trehalase-like 1 (yeast)                                      | BC023151  | 6.4967  | 7.6236  | -1.1269 |
| 1419247_at   | Rgs2          | regulator of G-protein signaling 2                                       | AF215668  | 5.3414  | 6.4697  | -1.1283 |
| 1424261_at   | Zfp672        | zinc finger protein 672                                                  | BC003258  | 5.3451  | 6.4737  | -1.1286 |
| 1438154_x_at | 2610002J02Rik | RIKEN cDNA 2610002J02 gene                                               | AV218922  | 8.3903  | 9.5203  | -1.1300 |
| 1421959_s_at | Adcy3         | adenylate cyclase 3                                                      | AF458089  | 5.4580  | 6.5881  | -1.1301 |
| 1435902_at   | Nudt18        | nudix (nucleoside diphosphate linked moiety X)-type motif 18             | BM120193  | 7.7356  | 8.8659  | -1.1303 |
| 1445685_at   | Gas7          | growth arrest specific 7                                                 | AI837851  | 5.7902  | 6.9213  | -1.1312 |
| 1431071_at   | Mtx3          | metaxin 3                                                                | AU078891  | 5.6041  | 6.7353  | -1.1312 |
| 1450765_a_at | Pde6h         | phosphodiesterase 6H, cGMP-specific, cone, gamma                         | NM_023898 | 4.6674  | 5.7990  | -1.1316 |
| 1440404_at   |               |                                                                          | AW557797  | 4.4791  | 5.6110  | -1.1319 |
| 1442980_at   |               |                                                                          | BI410529  | 5.4562  | 6.5881  | -1.1319 |
| 1455617_at   | Lmbrd1        | LMBR1 domain containing 1                                                | AV370003  | 6.1807  | 7.3128  | -1.1321 |
| 1453757_at   | Herc6         | hect domain and RLD 6                                                    | AI639807  | 5.3414  | 6.4737  | -1.1323 |
| 1426312_at   | Bre           | brain and reproductive organ-expressed protein                           | BE984258  | 9.1870  | 10.3195 | -1.1325 |
| 1415855_at   | Kitl          | kit ligand                                                               | BB815530  | 9.8599  | 10.9929 | -1.1330 |
| 1439745_at   | Cacng7        | calcium channel, voltage-dependent, gamma subunit 7                      | AV338037  | 6.3019  | 7.4364  | -1.1345 |
| 1425501_at   |               |                                                                          | BC003207  | 4.1336  | 5.2685  | -1.1349 |
| 1417581_at   | Dhodh         | dihydroorotate dehydrogenase                                             | NM_020046 | 6.9031  | 8.0382  | -1.1351 |

|              |               |                                                                                                                                      |           |         |         |         |
|--------------|---------------|--------------------------------------------------------------------------------------------------------------------------------------|-----------|---------|---------|---------|
| 1438352_at   | Mapre2        | microtubule-associated protein, RP/EB family, member 2                                                                               | BM217851  | 4.4301  | 5.5652  | -1.1352 |
| 1448913_at   | Smarcd1       | SWI/SNF related, matrix associated, actin dependent regulator of chromatin, subfamily d, member 1                                    | NM_031842 | 6.3420  | 7.4774  | -1.1354 |
| 1423770_at   | Tmc6          | transmembrane channel-like gene family 6                                                                                             | BC004840  | 6.9262  | 8.0618  | -1.1356 |
| 1418490_at   | Sdsl          | serine dehydratase-like                                                                                                              | NM_133902 | 5.7615  | 6.8973  | -1.1359 |
| 1427966_at   | Fam105b       | family with sequence similarity 105, member B                                                                                        | AW551849  | 8.6055  | 9.7414  | -1.1359 |
| 1440883_at   | Usp6nl        | USP6 N-terminal like                                                                                                                 | BM125576  | 8.1123  | 9.2484  | -1.1361 |
| 1457097_at   | Skap2         | src family associated phosphoprotein 2                                                                                               | BB212597  | 5.9249  | 7.0611  | -1.1363 |
| 1435393_at   | Mc1r          | melanocortin 1 receptor                                                                                                              | BB765942  | 4.6674  | 5.8041  | -1.1367 |
| 1451141_at   | Mettl8        | methyltransferase like 8                                                                                                             | BC004636  | 6.5881  | 7.7248  | -1.1367 |
| 1456494_a_at |               |                                                                                                                                      | BG068242  | 6.7532  | 7.8900  | -1.1368 |
| 1457083_at   |               |                                                                                                                                      | BB278392  | 5.3690  | 6.5058  | -1.1369 |
| 1423112_at   | Ube2d3        | ubiquitin-conjugating enzyme E2D 3                                                                                                   | AK009276  | 6.6079  | 7.7451  | -1.1372 |
| 1418285_at   | Efnb1         | ephrin B1                                                                                                                            | NM_010110 | 5.5837  | 6.7217  | -1.1379 |
| 1430753_at   | Dnhd1         | dynein heavy chain domain 1                                                                                                          | AK020222  | 4.5831  | 5.7210  | -1.1379 |
| 1452712_at   | Hnrnpa3       | heterogeneous nuclear ribonucleoprotein A3                                                                                           | AK011930  | 9.6299  | 10.7678 | -1.1380 |
| 1418667_at   | 2410002O22Rik | RIKEN cDNA 2410002O22 gene                                                                                                           | NM_025879 | 7.4502  | 8.5882  | -1.1381 |
| 1456176_x_at | Slc25a39      | solute carrier family 25, member 39                                                                                                  | AV209793  | 10.2049 | 11.3433 | -1.1384 |
| 1438630_x_at | Mat2a         | methionine adenosyltransferase II, alpha                                                                                             | AV260654  | 10.1428 | 11.2814 | -1.1386 |
| 1456597_at   | Heatr3        | HEAT repeat containing 3                                                                                                             | AV324623  | 7.6683  | 8.8070  | -1.1387 |
| 1435896_at   | Sfxn2         | sideroflexin 2                                                                                                                       | BG066686  | 6.6997  | 7.8384  | -1.1387 |
| 1446661_at   |               |                                                                                                                                      | BG066346  | 4.9195  | 6.0587  | -1.1392 |
| 1450080_at   | Cxx1c         | CAAX box 1C                                                                                                                          | NM_028375 | 5.3876  | 6.5268  | -1.1392 |
| 1436944_x_at |               |                                                                                                                                      | BB504983  | 9.8128  | 10.9522 | -1.1394 |
| 1420427_a_at | Dhx32         | DEAH (Asp-Glu-Ala-His) box polypeptide 32                                                                                            | NM_133941 | 8.1859  | 9.3276  | -1.1417 |
| 1433320_at   | 4930519N06Rik | RIKEN cDNA 4930519N06 gene                                                                                                           | AK015846  | 4.7207  | 5.8632  | -1.1425 |
| 1426697_a_at | Lrpap1        | low density lipoprotein receptor-related protein associated protein 1                                                                | D00622    | 7.0740  | 8.2169  | -1.1429 |
| 1418356_at   | Mpst          | mercaptopyruvate sulfurtransferase                                                                                                   | NM_138670 | 8.2003  | 9.3434  | -1.1430 |
| 1445667_at   | Tbc1d10a      | TBC1 domain family, member 10a                                                                                                       | BM939155  | 4.4971  | 5.6402  | -1.1431 |
| 1443204_at   |               |                                                                                                                                      | BB452391  | 4.1689  | 5.3122  | -1.1433 |
| 1429790_at   | Celf6         | CUGBP, Elav-like family member 6                                                                                                     | AK018246  | 4.3328  | 5.4771  | -1.1443 |
| 1433559_at   | Slc45a4       | solute carrier family 45, member 4                                                                                                   | BB811412  | 8.0327  | 9.1771  | -1.1444 |
| 1441046_at   |               |                                                                                                                                      | AV328302  | 5.2283  | 6.3729  | -1.1445 |
| 1422697_s_at | Jarid2        | jumonji, AT rich interactive domain 2                                                                                                | NM_021878 | 6.9190  | 8.0646  | -1.1456 |
| 1440226_at   | Zfp760        | zinc finger protein 760                                                                                                              | BB088782  | 6.8646  | 8.0105  | -1.1459 |
| 1458700_at   |               |                                                                                                                                      | BG793487  | 4.8130  | 5.9590  | -1.1461 |
| 1451890_at   | Kif13a        | kinesin family member 13A                                                                                                            | AB037923  | 6.1380  | 7.2842  | -1.1462 |
| 1456770_at   | Zfp14         | zinc finger protein 14                                                                                                               | BF730189  | 4.2303  | 5.3765  | -1.1462 |
| 1460695_a_at | 201011101Rik  | RIKEN cDNA 201011101 gene                                                                                                            | BC027288  | 7.8758  | 9.0220  | -1.1463 |
| 1436577_at   | Arhgef9       | CDC42 guanine nucleotide exchange factor (GEF) 9                                                                                     | BB380620  | 4.1950  | 5.3414  | -1.1464 |
| 1435628_x_at |               |                                                                                                                                      | AW763751  | 8.2505  | 9.3973  | -1.1468 |
| 1449296_a_at | Cnp           | 2',3'-cyclic nucleotide 3' phosphodiesterase                                                                                         | M58045    | 7.1097  | 8.2568  | -1.1471 |
| 1424135_at   | Rspry1        | ring finger and SPRY domain containing 1                                                                                             | BG073177  | 7.9081  | 9.0558  | -1.1477 |
| 1456144_at   | Nav3          | neuron navigator 3                                                                                                                   | AW537064  | 8.7973  | 9.9450  | -1.1478 |
| 1417495_x_at | Cp            | ceruloplasmin                                                                                                                        | BB332449  | 8.4507  | 9.5991  | -1.1484 |
| 1434048_at   | 4930471M23Rik | RIKEN cDNA 4930471M23 gene                                                                                                           | BB408093  | 6.3126  | 7.4611  | -1.1485 |
| 1428124_at   | Gtf2e1        | general transcription factor II E, polypeptide 1 (alpha subunit)                                                                     | AK011543  | 8.7389  | 9.8875  | -1.1486 |
| 1427258_at   | Trim24        | tripartite motif-containing 24                                                                                                       | BB611004  | 9.1646  | 10.3144 | -1.1498 |
| 1428992_at   | Unc13d        | unc-13 homolog D (C. elegans)                                                                                                        | AK011827  | 5.7828  | 6.9332  | -1.1504 |
| 1421469_a_at | Stat5a        | signal transducer and activator of transcription 5A                                                                                  | U36502    | 5.7184  | 6.8688  | -1.1505 |
| 1426074_at   |               |                                                                                                                                      | BC006770  | 5.7059  | 6.8564  | -1.1505 |
| 1458172_at   | Me2           | malic enzyme 2, NAD(+)-dependent, mitochondrial                                                                                      | BB200674  | 5.5433  | 6.6941  | -1.1507 |
| 1448563_at   | Phb           | prohibitin                                                                                                                           | AK010619  | 8.3707  | 9.5220  | -1.1513 |
| 1416935_at   | Trpv2         | transient receptor potential cation channel, subfamily V, member 2                                                                   | NM_011706 | 5.7819  | 6.9332  | -1.1513 |
| 1437172_x_at | Hadhb         | hydroxyacyl-Coenzyme A dehydrogenase/3-ketoacyl-Coenzyme A thiolase/enoyl-Coenzyme A hydratase (trifunctional protein), beta subunit | AV150884  | 9.4105  | 10.5621 | -1.1516 |
| 1441148_at   |               |                                                                                                                                      | BM119405  | 4.2245  | 5.3765  | -1.1520 |
| 1449055_x_at | Pcbp4         | poly(rC) binding protein 4                                                                                                           | NM_021567 | 7.7451  | 8.8973  | -1.1522 |
| 1428033_at   | Zfp937        | zinc finger protein 937                                                                                                              | BC028643  | 5.6402  | 6.7928  | -1.1525 |
| 1418455_at   | Copz2         | coatamer protein complex, subunit zeta 2                                                                                             | NM_019877 | 7.6898  | 8.8430  | -1.1532 |

|              |               |                                                             |           |         |         |         |
|--------------|---------------|-------------------------------------------------------------|-----------|---------|---------|---------|
| 1434784_s_at | Tmem106c      | transmembrane protein 106C                                  | BM222050  | 7.8087  | 8.9620  | -1.1533 |
| 1443052_at   |               |                                                             | BB400711  | 4.7762  | 5.9298  | -1.1536 |
| 1434815_a_at | Mapkapk3      | mitogen-activated protein kinase-activated protein kinase 3 | AI451985  | 8.6081  | 9.7618  | -1.1537 |
| 1424644_at   | Tbcc          | tubulin-specific chaperone C                                | AI426164  | 7.1645  | 8.3187  | -1.1542 |
| 1428498_at   | Rnf219        | ring finger protein 219                                     | AK011896  | 8.0327  | 9.1870  | -1.1543 |
| 1451047_at   | Itm2a         | integral membrane protein 2A                                | BI966443  | 8.4169  | 9.5715  | -1.1546 |
| 1426535_at   | Poglut1       | protein O-glucosyltransferase 1                             | AV307841  | 8.5270  | 9.6816  | -1.1546 |
| 1426291_at   | Dimt1         | DIM1 dimethyladenosine transferase 1-like (S. cerevisiae)   | AK015145  | 5.8041  | 6.9590  | -1.1548 |
| 1426220_at   | 4930471M23Rik | RIKEN cDNA 4930471M23 gene                                  | BC019457  | 7.2873  | 8.4424  | -1.1551 |
| 1438838_at   | B230206F22Rik | RIKEN cDNA B230206F22 gene                                  | BG141977  | 6.2957  | 7.4513  | -1.1556 |
| 1417667_a_at | Pter          | phosphotriesterase related                                  | NM_008961 | 8.8877  | 10.0433 | -1.1556 |
| 1452796_at   | Def6          | differentially expressed in FDCP 6                          | AK010356  | 4.8708  | 6.0270  | -1.1562 |
| 1440815_x_at |               |                                                             | BB099075  | 6.8539  | 8.0105  | -1.1567 |
| 1450868_at   | Hgsnat        | heparan-alpha-glucosaminide N-acetyltransferase             | BF468249  | 8.4972  | 9.6541  | -1.1569 |
| 1424497_at   | Tmem219       | transmembrane protein 219                                   | BC023442  | 7.0091  | 8.1664  | -1.1573 |
| 1441235_at   | Nup133        | nucleoporin 133                                             | BM942872  | 4.6206  | 5.7781  | -1.1574 |
| 1441988_at   | Ppm1k         | protein phosphatase 1K (PP2C domain containing)             | AI482429  | 6.4791  | 7.6381  | -1.1590 |
| 1436740_at   | 2610005L07Rik | cadherin 11 pseudogene                                      | AI585679  | 7.9515  | 9.1108  | -1.1593 |
| 1437719_x_at | A230046K03Rik | RIKEN cDNA A230046K03 gene                                  | BB387783  | 7.3372  | 8.4967  | -1.1595 |
| 1426417_at   | Yip4          | Yip1 domain family, member 4                                | AV216410  | 6.0873  | 7.2467  | -1.1595 |
| 1417505_s_at |               |                                                             | BC004619  | 6.8784  | 8.0382  | -1.1599 |
| 1419552_at   | Echdc1        | enoyl Coenzyme A hydratase domain containing 1              | NM_025855 | 7.8510  | 9.0109  | -1.1599 |
| 1435006_s_at | Abcb7         | ATP-binding cassette, sub-family B (MDR/TAP), member 7      | BM119407  | 8.9964  | 10.1568 | -1.1603 |
| 1432158_a_at | Trappc2       | trafficking protein particle complex 2                      | AK007951  | 9.2108  | 10.3716 | -1.1608 |
| 1455323_at   | Rbak          | RB-associated KRAB repressor                                | BB446066  | 7.1176  | 8.2791  | -1.1614 |
| 1448462_at   | Tdg           | thymine DNA glycosylase                                     | NM_011561 | 9.2840  | 10.4456 | -1.1616 |
| 1421773_at   | Etv2          | ets variant gene 2                                          | NM_007959 | 5.2286  | 6.3902  | -1.1616 |
| 1421061_at   | Guca1a        | guanylate cyclase activator 1a (retina)                     | NM_008189 | 7.3575  | 8.5191  | -1.1617 |
| 1452814_at   | Cpne3         | copine III                                                  | BM213277  | 9.7842  | 10.9459 | -1.1617 |
| 1453957_a_at | Igf2bp3       | insulin-like growth factor 2 mRNA binding protein 3         | AK011797  | 6.0440  | 7.2061  | -1.1621 |
| 1426061_x_at |               |                                                             | BC007159  | 9.0043  | 10.1673 | -1.1629 |
| 1416452_at   | Oat           | ornithine aminotransferase                                  | BC008119  | 10.4744 | 11.6373 | -1.1629 |
| 1419669_at   | Prtn3         | proteinase 3                                                | U97073    | 5.2778  | 6.4409  | -1.1631 |
| 1417496_at   | Cp            | ceruloplasmin                                               | BB332449  | 6.4601  | 7.6236  | -1.1635 |
| 1453252_at   | Dus4l         | dihydrouridine synthase 4-like (S. cerevisiae)              | AK010138  | 6.2392  | 7.4027  | -1.1635 |
| 1437341_x_at | Cnp           | 2',3'-cyclic nucleotide 3' phosphodiesterase                | BB251922  | 9.9565  | 11.1208 | -1.1643 |
| 1460006_at   | Zfx3          | zinc finger homeobox 3                                      | AI851177  | 6.8462  | 8.0105  | -1.1643 |
| 1439069_a_at | Pisd-ps3      | phosphatidylserine decarboxylase, pseudogene 3              | BB006121  | 8.6803  | 9.8453  | -1.1650 |
| 1447304_at   |               |                                                             | BE628556  | 4.5865  | 5.7515  | -1.1650 |
| 1451941_a_at | Fcgr2b        | Fc receptor, IgG, low affinity IIb                          | M14216    | 4.1035  | 5.2685  | -1.1650 |
| 1419525_at   | Car5a         | carbonic anhydrase 5a, mitochondrial                        | NM_007608 | 4.6127  | 5.7781  | -1.1653 |
| 1428568_at   | B230217C12Rik | RIKEN cDNA B230217C12 gene                                  | BB376573  | 5.7781  | 6.9436  | -1.1655 |
| 1417270_at   | Wdr12         | WD repeat domain 12                                         | NM_021312 | 6.0490  | 7.2147  | -1.1658 |
| 1428162_at   | 4933421E11Rik | RIKEN cDNA 4933421E11 gene                                  | AK008209  | 6.7857  | 7.9515  | -1.1659 |
| 1424241_at   | Slc30a6       | solute carrier family 30 (zinc transporter), member 6       | AF233346  | 8.2506  | 9.4168  | -1.1662 |
| 1457806_at   | Fam196a       | family with sequence similarity 196, member A               | BB292932  | 5.9820  | 7.1485  | -1.1664 |
| 1417861_at   | Ccnc          | cyclin C                                                    | NM_016746 | 6.2392  | 7.4057  | -1.1665 |
| 1460167_at   | Aldh7a1       | aldehyde dehydrogenase family 7, member A1                  | BC012407  | 8.7023  | 9.8691  | -1.1668 |
| 1431358_at   | 4930547N16Rik | RIKEN cDNA 4930547N16 gene                                  | BM877490  | 6.5578  | 7.7248  | -1.1670 |
| 1434444_s_at | Anapc1        | anaphase promoting complex subunit 1                        | AV113524  | 8.4235  | 9.5916  | -1.1681 |
| 1424393_s_at | Adhfe1        | alcohol dehydrogenase, iron containing, 1                   | BC026584  | 3.9836  | 5.1519  | -1.1683 |
| 1441910_x_at | Ccne1         | cyclin E1                                                   | BB293079  | 8.6606  | 9.8290  | -1.1684 |
| 1429212_a_at | Lrrc51        | leucine rich repeat containing 51                           | AK005758  | 5.4040  | 6.5730  | -1.1690 |
| 1424650_at   | Pdia5         | protein disulfide isomerase associated 5                    | BC009151  | 8.4809  | 9.6502  | -1.1693 |
| 1422952_at   | Ng23          | Ng23 protein                                                | NM_023893 | 5.9789  | 7.1485  | -1.1695 |
| 1433817_at   | Agpat3        | 1-acylglycerol-3-phosphate O-acyltransferase 3              | AV296997  | 6.7079  | 7.8778  | -1.1699 |
| 1426628_at   | Tmem184c      | transmembrane protein 184C                                  | BB431503  | 9.0490  | 10.2190 | -1.1700 |
| 1450921_at   | Aptx          | aprataxin                                                   | AK005286  | 7.7510  | 8.9215  | -1.1705 |
| 1454958_at   | Gsk3b         | glycogen synthase kinase 3 beta                             | BQ175580  | 9.0212  | 10.1917 | -1.1706 |

|              |                |                                                                |           |         |         |         |
|--------------|----------------|----------------------------------------------------------------|-----------|---------|---------|---------|
| 1426060_at   |                |                                                                | BC007159  | 9.0880  | 10.2586 | -1.1706 |
| 1441438_at   | Gpc6           | glypican 6                                                     | BB053542  | 4.6674  | 5.8382  | -1.1707 |
| 1444585_at   | Adc            | arginine decarboxylase                                         | BE946956  | 6.8729  | 8.0437  | -1.1708 |
| 1418798_s_at | Srpk3          | serine/arginine-rich protein specific kinase 3                 | NM_019684 | 4.8776  | 6.0489  | -1.1713 |
| 1418392_a_at | Gbp3           | guanylate binding protein 3                                    | NM_018734 | 9.0554  | 10.2271 | -1.1716 |
| 1426210_x_at | Parp3          | poly (ADP-ribose) polymerase family, member 3                  | BC014870  | 8.0672  | 9.2389  | -1.1717 |
| 1456038_at   | Fbxl4          | F-box and leucine-rich repeat protein 4                        | BB003709  | 7.9126  | 9.0845  | -1.1719 |
| 1422611_s_at | Igf2bp3        | insulin-like growth factor 2 mRNA binding protein 3            | NM_023670 | 7.4445  | 8.6192  | -1.1746 |
| 1423614_at   | Lrrc8c         | leucine rich repeat containing 8 family, member C              | BB329408  | 8.8272  | 10.0019 | -1.1747 |
| 1449981_a_at | Nat2           | N-acetyltransferase 2 (arylamine N-acetyltransferase)          | NM_010874 | 6.7532  | 7.9280  | -1.1748 |
| 1428653_x_at | Elavl1         | ELAV (embryonic lethal, abnormal vision)-like 1 (Hu antigen R) | BB003384  | 5.6689  | 6.8439  | -1.1750 |
| 1427529_at   | Fzd9           | frizzled homolog 9 (Drosophila)                                | Y17709    | 5.8305  | 7.0061  | -1.1756 |
| 1416798_a_at | Nme4           | NME/NM23 nucleoside diphosphate kinase 4                       | NM_019731 | 6.6177  | 7.7936  | -1.1759 |
| 1424519_at   | Mtg1           | mitochondrial GTPase 1 homolog (S. cerevisiae)                 | BC027306  | 7.9624  | 9.1384  | -1.1760 |
| 1451259_at   | Rexo2          | REX2, RNA exonuclease 2 homolog (S. cerevisiae)                | BC003445  | 9.3935  | 10.5702 | -1.1767 |
| 1418560_at   | Pdha1          | pyruvate dehydrogenase E1 alpha 1                              | NM_008810 | 10.5545 | 11.7315 | -1.1770 |
| 1457287_at   |                |                                                                | BQ031062  | 5.0425  | 6.2200  | -1.1775 |
| 1424228_at   | Polr3h         | polymerase (RNA) III (DNA directed) polypeptide H              | AK019868  | 6.2831  | 7.4611  | -1.1780 |
| 1424510_at   | Nudt6          | nudix (nucleoside diphosphate linked moiety X)-type motif 6    | BC027267  | 5.5631  | 6.7424  | -1.1793 |
| 1448890_at   | Klf2           | Kruppel-like factor 2 (lung)                                   | NM_008452 | 5.4771  | 6.6564  | -1.1793 |
| 1424772_at   | H2afj          | H2A histone family, member J                                   | BF661121  | 6.1888  | 7.3681  | -1.1794 |
| 1449641_at   | Adk            | adenosine kinase                                               | A1508733  | 4.4283  | 5.6083  | -1.1801 |
| 1422264_s_at | Klf9           | Kruppel-like factor 9                                          | NM_010638 | 5.6689  | 6.8490  | -1.1801 |
| 1460567_at   | Rfx7           | regulatory factor X, 7                                         | BB148972  | 8.3032  | 9.4836  | -1.1804 |
| 1422665_a_at | Pcmt1          | protein-L-isoaspartate (D-aspartate) O-methyltransferase 1     | NM_008786 | 7.7351  | 8.9155  | -1.1804 |
| 1440282_at   | Tulp4          | tubby like protein 4                                           | BB268998  | 6.0241  | 7.2047  | -1.1805 |
| 1423516_a_at | Nid2           | nidogen 2                                                      | BB781435  | 6.6275  | 7.8087  | -1.1812 |
| 1435614_s_at | Rasgrf1        | RAS protein-specific guanine nucleotide-releasing factor 1     | A1850720  | 5.0193  | 6.2005  | -1.1812 |
| 1442080_at   |                |                                                                | BI076747  | 5.9119  | 7.0932  | -1.1813 |
| 1456510_x_at |                |                                                                | BB703414  | 5.1383  | 6.3197  | -1.1814 |
| 1452828_at   | Fbxo21         | F-box protein 21                                               | BG076338  | 7.3650  | 8.5464  | -1.1814 |
| 1429785_at   | 5830458C19Rik  | RIKEN cDNA 5830458C19 gene                                     | BB192700  | 4.4874  | 5.6689  | -1.1814 |
| 1456795_at   | Bend4          | BEN domain containing 4                                        | BB449568  | 7.8586  | 9.0404  | -1.1818 |
| 1440619_at   | Mapk8ip1       | mitogen-activated protein kinase 8 interacting protein 1       | BB546463  | 4.7773  | 5.9590  | -1.1818 |
| 1453242_x_at | 2810047C21Rik1 | RIKEN cDNA 2810047C21 gene 1                                   | BB006969  | 4.9775  | 6.1607  | -1.1832 |
| 1459267_at   | 2310033P09Rik  | RIKEN cDNA 2310033P09 gene                                     | BB097524  | 5.2733  | 6.4574  | -1.1841 |
| 1425463_at   | Gata6          | GATA binding protein 6                                         | BM214048  | 4.9758  | 6.1607  | -1.1849 |
| 1442424_at   |                |                                                                | BB368771  | 6.0989  | 7.2842  | -1.1853 |
| 1418525_at   | Pcm1           | pericentriolar material 1                                      | NM_023662 | 6.4447  | 7.6302  | -1.1855 |
| 1435267_at   | 2610005L07Rik  | cadherin 11 pseudogene                                         | BB041868  | 5.9590  | 7.1453  | -1.1863 |
| 1430190_at   | Ccdc30         | coiled-coil domain containing 30                               | AK006668  | 4.6518  | 5.8382  | -1.1863 |
| 1417961_a_at | Trim30a        | tripartite motif-containing 30A                                | BM240719  | 8.6542  | 9.8406  | -1.1863 |
| 1455930_at   |                |                                                                | BI651113  | 6.6462  | 7.8326  | -1.1864 |
| 1456340_at   | Ntmt1          | N-terminal Xaa-Pro-Lys N-methyltransferase 1                   | AV309800  | 6.1437  | 7.3302  | -1.1865 |
| 1417570_at   | Anapc1         | anaphase promoting complex subunit 1                           | NM_008569 | 5.4334  | 6.6208  | -1.1873 |
| 1428550_at   | Ydjc           | YdjC homolog (bacterial)                                       | AK007503  | 6.1807  | 7.3687  | -1.1879 |
| 1441917_s_at | Tmem40         | transmembrane protein 40                                       | BB468188  | 6.0265  | 7.2147  | -1.1883 |
| 1426916_at   | Scrn3          | secernin 3                                                     | BM211317  | 7.4502  | 8.6386  | -1.1884 |
| 1447863_s_at | Nr4a2          | nuclear receptor subfamily 4, group A, member 2                | BB322941  | 6.8206  | 8.0105  | -1.1900 |
| 1453111_a_at | Slc25a39       | solute carrier family 25, member 39                            | AK019396  | 8.8906  | 10.0806 | -1.1901 |
| 1450494_x_at | Ceacam1        | carcinoembryonic antigen-related cell adhesion molecule 1      | NM_011926 | 5.2338  | 6.4242  | -1.1903 |
| 1452626_a_at | Fuom           | fucose mutarotase                                              | AK007494  | 7.4140  | 8.6044  | -1.1904 |
| 1431856_a_at | C1qtnf6        | C1q and tumor necrosis factor related protein 6                | AK012868  | 7.0755  | 8.2662  | -1.1907 |
| 1423841_at   | Brix1          | BRX1, biogenesis of ribosomes, homolog (S. cerevisiae)         | BC014832  | 6.6564  | 7.8473  | -1.1909 |
| 1436908_at   | Pcm1           | pericentriolar material 1                                      | BG076129  | 8.2598  | 9.4510  | -1.1912 |
| 1452410_a_at | Fes            | feline sarcoma oncogene                                        | BG867327  | 5.1786  | 6.3698  | -1.1912 |
| 1448117_at   | Kitl           | kit ligand                                                     | BB815530  | 7.2750  | 8.4671  | -1.1921 |

|              |               |                                                                                                                |           |         |         |         |
|--------------|---------------|----------------------------------------------------------------------------------------------------------------|-----------|---------|---------|---------|
| 1435187_at   | Tomm20        | translocase of outer mitochondrial membrane 20 homolog (yeast)                                                 | BG064946  | 8.0883  | 9.2805  | -1.1922 |
| 1455321_at   | Ddhd1         | DDHD domain containing 1                                                                                       | BM226111  | 7.2346  | 8.4281  | -1.1936 |
| 1429218_at   | Det1          | de-etiolated homolog 1 (Arabidopsis)                                                                           | BE457100  | 6.5578  | 7.7514  | -1.1936 |
| 1420123_at   | Tcta          | T cell leukemia translocation altered gene                                                                     | C85065    | 6.3902  | 7.5840  | -1.1939 |
| 1417134_at   | Srpk2         | serine/arginine-rich protein specific kinase 2                                                                 | NM_009274 | 8.7678  | 9.9618  | -1.1939 |
| 1418345_at   |               |                                                                                                                | NM_023517 | 5.6868  | 6.8811  | -1.1943 |
| 1427081_at   | A630072M18Rik | RIKEN cDNA A630072M18 gene                                                                                     | BB246700  | 4.4167  | 5.6110  | -1.1943 |
| 1443618_at   |               |                                                                                                                | AU046269  | 3.9024  | 5.0970  | -1.1945 |
| 1453232_at   | Calr3         | calreticulin 3                                                                                                 | AK006582  | 4.2163  | 5.4108  | -1.1945 |
| 1424812_at   | BC017158      | cDNA sequence BC017158                                                                                         | BC017158  | 5.8446  | 7.0394  | -1.1948 |
| 1422822_at   | Stard5        | StAR-related lipid transfer (START) domain containing 5                                                        | BI076697  | 5.7961  | 6.9911  | -1.1950 |
| 1428285_at   | 8430427H17Rik | RIKEN cDNA 8430427H17 gene                                                                                     | AK018446  | 6.1556  | 7.3506  | -1.1950 |
| 1435931_at   |               |                                                                                                                | BM937727  | 5.6488  | 6.8439  | -1.1951 |
| 1435057_x_at | Polr1e        | polymerase (RNA) I polypeptide E                                                                               | BE334128  | 7.2575  | 8.4528  | -1.1953 |
| 1449054_a_at | Pcbp4         | poly(rC) binding protein 4                                                                                     | NM_021567 | 7.4894  | 8.6849  | -1.1955 |
| 1454976_at   | Sod2          | superoxide dismutase 2, mitochondrial                                                                          | BQ174944  | 6.6477  | 7.8436  | -1.1958 |
| 1423608_at   | Itm2a         | integral membrane protein 2A                                                                                   | BI966443  | 9.3336  | 10.5295 | -1.1958 |
| 1435574_at   |               |                                                                                                                | BB428304  | 5.2681  | 6.4643  | -1.1962 |
| 1454794_at   | Spast         | spastin                                                                                                        | AV298495  | 7.6354  | 8.8320  | -1.1966 |
| 1459886_at   |               |                                                                                                                | BF472132  | 5.7245  | 6.9213  | -1.1968 |
| 1450759_at   | Bmp6          | bone morphogenetic protein 6                                                                                   | NM_007556 | 5.4443  | 6.6421  | -1.1977 |
| 1454676_s_at | Ticam1        | toll-like receptor adaptor molecule 1                                                                          | BB452539  | 6.2794  | 7.4774  | -1.1981 |
| 1427907_at   | 1110037F02Rik | RIKEN cDNA 1110037F02 gene                                                                                     | AK012768  | 7.6056  | 8.8037  | -1.1981 |
| 1424987_at   | 5430435G22Rik | RIKEN cDNA 5430435G22 gene                                                                                     | BB128517  | 8.5770  | 9.7751  | -1.1982 |
| 1456404_at   | Adamts5       | a disintegrin-like and metalloproteinase (reprolysin type) with thrombospondin type 1 motif, 5 (aggrecanase-2) | BB475194  | 4.1071  | 5.3054  | -1.1983 |
| 1452949_at   | Polr3b        | polymerase (RNA) III (DNA directed) polypeptide B                                                              | AK012532  | 5.8297  | 7.0284  | -1.1986 |
| 1443390_at   |               |                                                                                                                | BB390851  | 5.1383  | 6.3376  | -1.1993 |
| 1428289_at   | Klf9          | Kruppel-like factor 9                                                                                          | AW488885  | 9.0454  | 10.2450 | -1.1996 |
| 1458208_s_at | Mccc1         | methylcrotonoyl-Coenzyme A carboxylase 1 (alpha)                                                               | BB770903  | 4.6631  | 5.8632  | -1.2000 |
| 1435801_at   | Fktn          | fukutin                                                                                                        | AV365405  | 8.3934  | 9.5935  | -1.2001 |
| 1425369_a_at | Sox10         | SRY-box containing gene 10                                                                                     | BC018551  | 4.9195  | 6.1198  | -1.2003 |
| 1445169_at   |               |                                                                                                                | BM232503  | 6.0653  | 7.2656  | -1.2003 |
| 1424850_at   | Map3k1        | mitogen-activated protein kinase kinase kinase 1                                                               | L13103    | 5.3054  | 6.5058  | -1.2004 |
| 1426321_at   | Tbx4          | T-box 4                                                                                                        | AY075134  | 4.4094  | 5.6098  | -1.2004 |
| 1440302_at   | Slc25a3       | solute carrier family 25 (mitochondrial carrier, phosphate carrier), member 3                                  | AV221818  | 4.8229  | 6.0239  | -1.2010 |
| 1451117_a_at | Tom1l1        | target of myb1-like 1 (chicken)                                                                                | BC004710  | 4.5329  | 5.7343  | -1.2014 |
| 1430697_at   | Ammecr1       | Alport syndrome, mental retardation, midface hypoplasia and elliptocytosis chromosomal region gene 1           | BM235514  | 8.0850  | 9.2867  | -1.2017 |
| 1455186_a_at | 1190003J15Rik | RIKEN cDNA 1190003J15 gene                                                                                     | BI556771  | 5.9616  | 7.1635  | -1.2020 |
| 1438075_at   | Fem1c         | fem-1 homolog c (C.elegans)                                                                                    | BB752524  | 6.3258  | 7.5278  | -1.2020 |
| 1435945_a_at | Kcnn4         | potassium intermediate/small conductance calcium-activated channel, subfamily N, member 4                      | BG865910  | 10.3207 | 11.5243 | -1.2037 |
| 1418396_at   | Gpsm3         | G-protein signalling modulator 3 (AGS3-like, C. elegans)                                                       | NM_134116 | 5.5708  | 6.7746  | -1.2037 |
| 1457230_at   | Gnpda2        | glucosamine-6-phosphate deaminase 2                                                                            | BB458901  | 3.9593  | 5.1632  | -1.2039 |
| 1424918_at   | Tbc1d19       | TBC1 domain family, member 19                                                                                  | BC020138  | 8.0903  | 9.2943  | -1.2040 |
| 1438049_at   |               |                                                                                                                | AW541326  | 7.5468  | 8.7511  | -1.2044 |
| 1456217_at   | Ubf1          | ubiquitin family domain containing 1                                                                           | AV369711  | 5.0970  | 6.3015  | -1.2045 |
| 1451546_s_at | Tmem40        | transmembrane protein 40                                                                                       | BC019416  | 4.9599  | 6.1645  | -1.2046 |
| 1422743_at   | Phka1         | phosphorylase kinase alpha 1                                                                                   | NM_008832 | 6.5268  | 7.7316  | -1.2048 |
| 1434380_at   | Gbp7          | guanylate binding protein 7                                                                                    | BM241271  | 8.9609  | 10.1660 | -1.2051 |
| 1455583_at   | Gne           | glucosamine (UDP-N-acetyl)-2-epimerase/N-acetylmannosamine kinase                                              | AV371374  | 5.1960  | 6.4012  | -1.2052 |
| 1423156_at   | Gnpnat1       | glucosamine-phosphate N-acetyltransferase 1                                                                    | AK008566  | 8.6837  | 9.8894  | -1.2057 |
| 1417245_at   | Gpr180        | G protein-coupled receptor 180                                                                                 | NM_021434 | 8.3630  | 9.5691  | -1.2061 |
| 1448484_at   | Amd1          | S-adenosylmethionine decarboxylase 1                                                                           | NM_009665 | 10.4712 | 11.6774 | -1.2062 |
| 1433506_at   | Lrrc8d        | leucine rich repeat containing 8D                                                                              | BB315861  | 7.2252  | 8.4319  | -1.2067 |
| 1435830_a_at | 5430435G22Rik | RIKEN cDNA 5430435G22 gene                                                                                     | AV293314  | 6.6578  | 7.8647  | -1.2070 |
| 1455744_at   |               |                                                                                                                | BG076066  | 7.0913  | 8.2983  | -1.2070 |

|              |               |                                                                |           |         |         |         |
|--------------|---------------|----------------------------------------------------------------|-----------|---------|---------|---------|
| 1428718_at   | Scrn1         | secernin 1                                                     | AW490544  | 4.8958  | 6.1031  | -1.2073 |
| 1424420_at   | Ccpg1         | cell cycle progression 1                                       | BC006717  | 5.6110  | 6.8186  | -1.2076 |
| 1435715_x_at |               |                                                                | BF318654  | 10.1012 | 11.3090 | -1.2079 |
| 1424041_s_at | C1s           | complement component 1, s subcomponent                         | BC022123  | 6.6135  | 7.8215  | -1.2081 |
| 1426387_x_at |               |                                                                | BB085906  | 9.6472  | 10.8553 | -1.2081 |
| 1446615_at   |               |                                                                | BB466294  | 4.7862  | 5.9954  | -1.2093 |
| 1447188_at   |               |                                                                | AU016662  | 4.7725  | 5.9820  | -1.2095 |
| 1455073_at   | Cdadc1        | cytidine and dCMP deaminase domain containing 1                | BB178837  | 5.3483  | 6.5578  | -1.2095 |
| 1455199_at   | AI429214      | expressed sequence AI429214                                    | BB667176  | 5.2803  | 6.4898  | -1.2096 |
| 1417075_at   | Fam136a       | family with sequence similarity 136, member A                  | NM_025591 | 9.7866  | 10.9963 | -1.2097 |
| 1438432_at   | Lnpep         | leucyl/cystinyl aminopeptidase                                 | BE850004  | 9.1047  | 10.3146 | -1.2099 |
| 1418120_at   | Rbm8a         | RNA binding motif protein 8a                                   | NM_025875 | 6.9332  | 8.1436  | -1.2104 |
| 1430348_at   | 2900019E01Rik | RIKEN cDNA 2900019E01 gene                                     | BE945320  | 4.5409  | 5.7515  | -1.2106 |
| 1435834_at   | Fancf         | Fanconi anemia, complementation group F                        | BB667193  | 7.0351  | 8.2458  | -1.2106 |
| 1423621_a_at | Slc33a1       | solute carrier family 33 (acetyl-CoA transporter), member 1    | BM235996  | 8.2505  | 9.4612  | -1.2107 |
| 1428514_at   | Cpne3         | copine III                                                     | BM213277  | 7.0528  | 8.2639  | -1.2111 |
| 1432211_a_at | Fbxo9         | f-box protein 9                                                | AK018482  | 6.7341  | 7.9457  | -1.2116 |
| 1438532_at   | Hmcn1         | hemicentin 1                                                   | BB024475  | 3.9798  | 5.1918  | -1.2120 |
| 1426460_a_at | Ugp2          | UDP-glucose pyrophosphorylase 2                                | AI788759  | 6.3234  | 7.5356  | -1.2122 |
| 1417408_at   | F3            | coagulation factor III                                         | BC024886  | 8.9680  | 10.1806 | -1.2126 |
| 1422064_a_at | Zbtb20        | zinc finger and BTB domain containing 20                       | AY028963  | 6.4915  | 7.7042  | -1.2127 |
| 1428083_at   | Neat1         | nuclear paraspeckle assembly transcript 1 (non-protein coding) | AK018202  | 9.1863  | 10.3997 | -1.2134 |
| 1441881_x_at | Fam101a       | family with sequence similarity 101, member A                  | BB458543  | 6.2799  | 7.4935  | -1.2136 |
| 1453162_at   | Utp11l        | UTP11-like, U3 small nucleolar ribonucleoprotein, (yeast)      | AK008801  | 8.1849  | 9.3999  | -1.2150 |
| 1449278_at   | Eif2ak3       | eukaryotic translation initiation factor 2 alpha kinase 3      | NM_010121 | 8.5849  | 9.8007  | -1.2158 |
| 1436456_at   | Slc38a9       | solute carrier family 38, member 9                             | BQ031896  | 4.7725  | 5.9886  | -1.2161 |
| 1416320_at   | Sec22a        | SEC22 vesicle trafficking protein homolog A (S. cerevisiae)    | NM_133704 | 6.8899  | 8.1061  | -1.2162 |
| 1417668_at   | Rtn4ip1       | reticulon 4 interacting protein 1                              | NM_130892 | 5.3414  | 6.5578  | -1.2164 |
| 1425679_a_at | Mapk8ip1      | mitogen-activated protein kinase 8 interacting protein 1       | AF109769  | 5.9590  | 7.1762  | -1.2172 |
| 1428970_at   | Naa50         | N(alpha)-acetyltransferase 50, NatE catalytic subunit          | AV113878  | 8.9810  | 10.1983 | -1.2173 |
| 1427156_s_at | Ascc2         | activating signal cointegrator 1 complex subunit 2             | BB756983  | 7.5938  | 8.8112  | -1.2173 |
| 1416950_at   | Tnfaip8       | tumor necrosis factor, alpha-induced protein 8                 | NM_134131 | 9.2353  | 10.4529 | -1.2176 |
| 1458161_at   | Kcnq1ot1      | KCNQ1 overlapping transcript 1                                 | BM248551  | 5.8393  | 7.0575  | -1.2183 |
| 1435567_at   | Phka1         | phosphorylase kinase alpha 1                                   | AI504378  | 6.7221  | 7.9405  | -1.2185 |
| 1435244_at   | Vav2          | vav 2 oncogene                                                 | BF535947  | 6.3084  | 7.5278  | -1.2194 |
| 1434630_at   | Ankrd28       | ankyrin repeat domain 28                                       | AV261293  | 7.9993  | 9.2189  | -1.2196 |
| 1441664_at   | AW049021      | expressed sequence AW049021                                    | BB375185  | 5.6615  | 6.8811  | -1.2197 |
| 1428023_at   | 3110009E18Rik | RIKEN cDNA 3110009E18 gene                                     | AA879840  | 6.8750  | 8.0948  | -1.2198 |
| 1438916_x_at | 6720401G13Rik | RIKEN cDNA 6720401G13 gene                                     | AI452037  | 3.8342  | 5.0544  | -1.2202 |
| 1444764_at   |               |                                                                | BB154851  | 4.6674  | 5.8877  | -1.2203 |
| 1435924_at   | Tfb1m         | transcription factor B1, mitochondrial                         | AW551319  | 5.6105  | 6.8313  | -1.2208 |
| 1416259_at   | Pex12         | peroxisomal biogenesis factor 12                               | NM_134025 | 6.5242  | 7.7451  | -1.2209 |
| 1435270_x_at | N6amt2        | N-6 adenine-specific DNA methyltransferase 2 (putative)        | BF730076  | 7.4308  | 8.6518  | -1.2210 |
| 1441937_s_at | Pink1         | PTEN induced putative kinase 1                                 | AV371921  | 7.6525  | 8.8738  | -1.2213 |
| 1443872_at   |               |                                                                | AW493461  | 3.9700  | 5.1918  | -1.2218 |
| 1449541_x_at | 1700010I14Rik | RIKEN cDNA 1700010I14 gene                                     | NM_025851 | 4.2219  | 5.4443  | -1.2225 |
| 1458553_at   | Plat          | plasminogen activator, tissue                                  | BG069823  | 5.1313  | 6.3540  | -1.2227 |
| 1431792_a_at | Stk11ip       | serine/threonine kinase 11 interacting protein                 | AK004757  | 5.7945  | 7.0173  | -1.2228 |
| 1437000_at   | Dgkq          | diacylglycerol kinase, theta                                   | BB818538  | 6.4353  | 7.6597  | -1.2244 |
| 1434975_x_at | Pisd-ps3      | phosphatidylserine decarboxylase, pseudogene 3                 | AA673371  | 9.8235  | 11.0484 | -1.2249 |
| 1448432_at   | Plcd1         | phospholipase C, delta 1                                       | NM_019676 | 6.1394  | 7.3643  | -1.2249 |
| 1436462_at   |               |                                                                | BM899333  | 5.9467  | 7.1717  | -1.2250 |
| 1416630_at   | Id3           | inhibitor of DNA binding 3                                     | NM_008321 | 9.9410  | 11.1661 | -1.2250 |
| 1429400_at   | Clcn5         | chloride channel 5                                             | BB794830  | 8.8220  | 10.0474 | -1.2254 |
| 1417029_a_at | Trim2         | tripartite motif-containing 2                                  | BB283676  | 4.8229  | 6.0489  | -1.2260 |
| 1437774_at   | 1700020I14Rik | RIKEN cDNA 1700020I14 gene                                     | BB778614  | 5.7186  | 6.9447  | -1.2261 |
| 1439571_at   | E230008J23Rik | RIKEN cDNA E230008J23 gene                                     | BB820889  | 5.2636  | 6.4898  | -1.2262 |
| 1452386_at   | Sall3         | sal-like 3 (Drosophila)                                        | X97581    | 5.5663  | 6.7928  | -1.2265 |



|              |               |                                                                    |           |         |         |         |
|--------------|---------------|--------------------------------------------------------------------|-----------|---------|---------|---------|
| 1415911_at   | Impact        | imprinted and ancient                                              | NM_008378 | 7.5306  | 8.7578  | -1.2272 |
| 1416900_s_at |               |                                                                    | NM_138647 | 5.8174  | 7.0448  | -1.2274 |
| 1418409_at   | Jrk           | jerky                                                              | NM_008415 | 5.9206  | 7.1485  | -1.2279 |
| 1436858_at   |               |                                                                    | BB003847  | 7.9260  | 9.1540  | -1.2279 |
| 1423610_at   | Metap2        | methionine aminopeptidase 2                                        | BG086961  | 10.3522 | 11.5805 | -1.2283 |
| 1428777_at   | Spred1        | sprouty protein with EVH-1 domain 1, related sequence              | AK017680  | 6.1570  | 7.3855  | -1.2285 |
| 1424257_at   | Cdk7          | cyclin-dependent kinase 7                                          | BC004605  | 5.0544  | 6.2831  | -1.2287 |
| 1444062_at   | 2900056L01Rik | RIKEN cDNA 2900056L01 gene                                         | AI428930  | 6.6073  | 7.8360  | -1.2287 |
| 1432417_a_at | Tspan2        | tetraspanin 2                                                      | AK020982  | 5.7162  | 6.9450  | -1.2288 |
| 1436353_at   | A230046K03Rik | RIKEN cDNA A230046K03 gene                                         | AU018634  | 8.3701  | 9.5991  | -1.2290 |
| 1456492_at   | Mau2          | MAU2 chromatid cohesion factor homolog (C. elegans)                | BB279767  | 6.1404  | 7.3699  | -1.2295 |
| 1454724_x_at | Fam108b       | family with sequence similarity 108, member B                      | AV173092  | 10.2398 | 11.4698 | -1.2300 |
| 1437001_at   | Gsk3b         | glycogen synthase kinase 3 beta                                    | BQ173949  | 9.0610  | 10.2914 | -1.2304 |
| 1437088_at   | Sdad1         | SDA1 domain containing 1                                           | BB480041  | 7.6597  | 8.8904  | -1.2307 |
| 1427670_a_at | Tcf12         | transcription factor 12                                            | M97636    | 10.9370 | 12.1682 | -1.2311 |
| 1424776_a_at | Slc25a28      | solute carrier family 25, member 28                                | BC025908  | 8.8758  | 10.1069 | -1.2312 |
| 1450905_at   | Plxnc1        | plexin C1                                                          | BB476707  | 4.0372  | 5.2685  | -1.2313 |
| 1421656_at   | Spry2         | sprouty homolog 2 (Drosophila)                                     | NM_011897 | 5.8877  | 7.1192  | -1.2314 |
| 1424524_at   | Dram1         | DNA-damage regulated autophagy modulator 1                         | BC021433  | 6.3658  | 7.5972  | -1.2315 |
| 1422821_s_at | Stard5        | StAR-related lipid transfer (START) domain containing 5            | BI076697  | 7.4794  | 8.7109  | -1.2315 |
| 1452599_s_at | AI413582      | expressed sequence AI413582                                        | AV039444  | 8.1061  | 9.3382  | -1.2320 |
| 1444269_at   |               |                                                                    | BM120561  | 4.5566  | 5.7896  | -1.2330 |
| 1434755_at   | Coro2b        | coronin, actin binding protein, 2B                                 | BB538661  | 6.0777  | 7.3117  | -1.2340 |
| 1431802_a_at | Ept1          | ethanolaminophosphotransferase 1 (CDP-ethanolamine-specific)       | AK014530  | 8.4035  | 9.6378  | -1.2343 |
| 1447864_s_at | Pogk          | pogo transposable element with KRAB domain                         | AV377712  | 7.3230  | 8.5579  | -1.2349 |
| 1452700_s_at | Kbtbd7        | kelch repeat and BTB (POZ) domain containing 7                     | AK003597  | 6.9213  | 8.1565  | -1.2351 |
| 1416260_a_at | Snx1          | sorting nexin 1                                                    | NM_019727 | 8.7444  | 9.9800  | -1.2355 |
| 1448188_at   | Ucp2          | uncoupling protein 2 (mitochondrial, proton carrier)               | BC012697  | 6.9109  | 8.1468  | -1.2359 |
| 1428630_x_at | Haghl         | hydroxyacylglutathione hydrolase-like                              | AK021220  | 7.6645  | 8.9005  | -1.2360 |
| 1437771_at   | Lrrn4cl       | LRRN4 C-terminal like                                              | BB783125  | 5.6970  | 6.9332  | -1.2362 |
| 1417441_at   | Dnajc12       | Dnaj (Hsp40) homolog, subfamily C, member 12                       | NM_013888 | 6.6525  | 7.8892  | -1.2366 |
| 1448546_at   | Rassf3        | Ras association (RalGDS/AF-6) domain family member 3               | BB703307  | 7.5015  | 8.7382  | -1.2367 |
| 1433838_at   | Dars2         | aspartyl-tRNA synthetase 2 (mitochondrial)                         | BM228846  | 7.2808  | 8.5176  | -1.2369 |
| 1428989_at   | 0710001D07Rik | RIKEN cDNA 0710001D07 gene                                         | AK002941  | 4.3903  | 5.6274  | -1.2372 |
| 1423966_at   | Cd99l2        | CD99 antigen-like 2                                                | BB038546  | 6.6406  | 7.8778  | -1.2372 |
| 1451172_at   | Tprgl         | transformation related protein 63 regulated like                   | BC019544  | 9.1895  | 10.4275 | -1.2380 |
| 1426508_at   | Gfap          | glial fibrillary acidic protein                                    | BB183081  | 4.7207  | 5.9590  | -1.2383 |
| 1426345_at   | Prepl         | prolyl endopeptidase-like                                          | BB005298  | 6.9735  | 8.2121  | -1.2386 |
| 1446624_at   | Fktn          | fukutin                                                            | BB518629  | 6.9314  | 8.1700  | -1.2387 |
| 1418491_a_at | Pus3          | pseudouridine synthase 3                                           | NM_023292 | 6.4574  | 7.6973  | -1.2399 |
| 1434443_at   | Anapc1        | anaphase promoting complex subunit 1                               | AV113524  | 7.6215  | 8.8617  | -1.2402 |
| 1456790_at   | Zfp800        | zinc finger protein 800                                            | BB139169  | 6.5873  | 7.8279  | -1.2405 |
| 1417062_at   | Armc10        | armadillo repeat containing 10                                     | NM_026034 | 8.8221  | 10.0632 | -1.2411 |
| 1460053_at   | Smyd4         | SET and MYND domain containing 4                                   | BB021163  | 7.5757  | 8.8169  | -1.2412 |
| 1418085_at   | Prkcz         | protein kinase C, zeta                                             | NM_008860 | 4.9195  | 6.1607  | -1.2412 |
| 1432783_at   | 4930556A17Rik | RIKEN cDNA 4930556A17 gene                                         | AK019768  | 4.0950  | 5.3364  | -1.2413 |
| 1436650_at   | Filip1        | filamin A interacting protein 1                                    | AV241894  | 4.4390  | 5.6805  | -1.2415 |
| 1434187_at   | Alg11         | asparagine-linked glycosylation 11 (alpha-1,2-mannosyltransferase) | AW121238  | 7.3026  | 8.5444  | -1.2418 |
| 1455906_at   | Tmem241       | transmembrane protein 241                                          | AV222909  | 4.6695  | 5.9119  | -1.2424 |
| 1451634_at   | Airn          | antisense Igf2r RNA                                                | BC009123  | 6.2200  | 7.4625  | -1.2425 |
| 1439128_at   | Zbtb20        | zinc finger and BTB domain containing 20                           | AI595815  | 6.6791  | 7.9221  | -1.2430 |
| 1416292_at   | Prdx3         | peroxiredoxin 3                                                    | NM_007452 | 9.6594  | 10.9025 | -1.2431 |
| 1417394_at   | Klf4          | Kruppel-like factor 4 (gut)                                        | BG069413  | 10.3093 | 11.5527 | -1.2434 |
| 1425800_at   | Rad9b         | RAD9 homolog B (S. cerevisiae)                                     | BC021784  | 4.1035  | 5.3489  | -1.2454 |
| 1455580_at   | Usp6nl        | USP6 N-terminal like                                               | BE851876  | 8.4362  | 9.6816  | -1.2454 |
| 1421425_a_at | Rcan2         | regulator of calcineurin 2                                         | NM_030598 | 4.4063  | 5.6522  | -1.2459 |
| 1435819_at   |               |                                                                    | BB833422  | 4.8302  | 6.0777  | -1.2475 |
| 1452056_s_at | Ppp3ca        | protein phosphatase 3, catalytic subunit, alpha isoform            | BQ173889  | 8.6570  | 9.9050  | -1.2481 |
| 1449040_a_at | Sephs2        | selenophosphate synthetase 2                                       | NM_009266 | 8.5463  | 9.7945  | -1.2482 |

|              |               |                                                                                       |           |        |         |         |
|--------------|---------------|---------------------------------------------------------------------------------------|-----------|--------|---------|---------|
| 1460082_at   | Ing3          | inhibitor of growth family, member 3                                                  | BB298005  | 4.9195 | 6.1678  | -1.2483 |
| 1439783_at   | C330018D20Rik | RIKEN cDNA C330018D20 gene                                                            | BB809870  | 4.6991 | 5.9476  | -1.2485 |
| 1448619_at   | Dhcr7         | 7-dehydrocholesterol reductase                                                        | NM_007856 | 8.7084 | 9.9572  | -1.2488 |
| 1449025_at   | Ifit3         | interferon-induced protein with tetratricopeptide repeats 3                           | NM_010501 | 9.4687 | 10.7179 | -1.2491 |
| 1441876_x_at | Zfp93         | zinc finger protein 93                                                                | BB245574  | 4.4196 | 5.6689  | -1.2493 |
| 1418658_at   | Fam82b        | family with sequence similarity 82, member B                                          | BC025158  | 6.5111 | 7.7607  | -1.2496 |
| 1438254_at   |               |                                                                                       | BF118887  | 7.4419 | 8.6919  | -1.2500 |
| 1431017_at   | Rcbtb2        | regulator of chromosome condensation (RCC1) and BTB (POZ) domain containing protein 2 | AK013540  | 4.6127 | 5.8632  | -1.2504 |
| 1442918_at   | Nav3          | neuron navigator 3                                                                    | AW123147  | 5.8877 | 7.1383  | -1.2505 |
| 1455505_at   | Gatad2a       | GATA zinc finger domain containing 2A                                                 | AI840824  | 7.1072 | 8.3585  | -1.2513 |
| 1429431_at   | Ikzf5         | IKAROS family zinc finger 5                                                           | AK009564  | 8.4758 | 9.7271  | -1.2514 |
| 1417588_at   | Galnt3        | UDP-N-acetyl-alpha-D-galactosamine:polypeptide N-acetylgalactosaminyltransferase 3    | AK019995  | 3.9701 | 5.2215  | -1.2514 |
| 1446475_at   |               |                                                                                       | BM207891  | 5.3214 | 6.5730  | -1.2517 |
| 1425836_a_at | Limk1         | LIM-domain containing, protein kinase                                                 | U14166    | 6.6564 | 7.9081  | -1.2517 |
| 1424182_at   | Acat1         | acetyl-Coenzyme A acetyltransferase 1                                                 | BG070487  | 7.0394 | 8.2918  | -1.2524 |
| 1456117_at   | Rrp1b         | ribosomal RNA processing 1 homolog B (S. cerevisiae)                                  | AV228374  | 8.4243 | 9.6767  | -1.2524 |
| 1452099_at   | Diexf         | digestive organ expansion factor homolog (zebrafish)                                  | BG070043  | 7.2436 | 8.4967  | -1.2531 |
| 1452053_a_at | Tmem33        | transmembrane protein 33                                                              | BB771960  | 9.0023 | 10.2558 | -1.2535 |
| 1449157_at   | Nr2c1         | nuclear receptor subfamily 2, group C, member 1                                       | NM_011629 | 4.2966 | 5.5508  | -1.2541 |
| 1455297_at   | Spin2         | spindlin family, member 2                                                             | BG070258  | 4.9657 | 6.2200  | -1.2542 |
| 1433717_at   | D19Wsu162e    | DNA segment, Chr 19, Wayne State University 162, expressed                            | BI903574  | 7.8808 | 9.1356  | -1.2548 |
| 1460138_at   |               |                                                                                       | BI500065  | 4.8229 | 6.0777  | -1.2548 |
| 1450287_at   | Npas3         | neuronal PAS domain protein 3                                                         | BE288934  | 4.7497 | 6.0047  | -1.2550 |
| 1454648_s_at | D10Wsu102e    | DNA segment, Chr 10, Wayne State University 102, expressed                            | AV025581  | 8.3123 | 9.5677  | -1.2554 |
| 1440862_at   |               |                                                                                       | BB629079  | 5.9590 | 7.2147  | -1.2557 |
| 1458462_at   | Arhgap30      | Rho GTPase activating protein 30                                                      | AI447596  | 3.9445 | 5.2020  | -1.2574 |
| 1423880_at   | D10Wsu52e     | DNA segment, Chr 10, Wayne State University 52, expressed                             | BC003288  | 9.2817 | 10.5397 | -1.2580 |
| 1422692_at   | Sub1          | SUB1 homolog (S. cerevisiae)                                                          | BE989104  | 7.3490 | 8.6081  | -1.2592 |
| 1433925_at   | Dync1li2      | dynein, cytoplasmic 1 light intermediate chain 2                                      | BM212035  | 8.5579 | 9.8181  | -1.2601 |
| 1416242_at   | Klhl13        | kelch-like 13 (Drosophila)                                                            | NM_026167 | 4.1842 | 5.4445  | -1.2603 |
| 1428929_s_at | Slc25a26      | solute carrier family 25 (mitochondrial carrier, phosphate carrier), member 26        | BC019170  | 6.1336 | 7.3941  | -1.2605 |
| 1447880_x_at | S1pr2         | sphingosine-1-phosphate receptor 2                                                    | AV310929  | 7.1079 | 8.3684  | -1.2606 |
| 1449066_a_at | Arhgef7       | Arp2/3 complex guanine nucleotide exchange factor (GEF)                               | NM_017402 | 7.9457 | 9.2067  | -1.2610 |
| 1436385_at   | Ganc          | glucosidase, alpha; neutral C                                                         | BB051441  | 5.1289 | 6.3902  | -1.2613 |
| 1449730_s_at | Fzd3          | frizzled homolog 3 (Drosophila)                                                       | AU020229  | 5.6953 | 6.9566  | -1.2613 |
| 1425059_at   | Prmt6         | protein arginine N-methyltransferase 6                                                | BC022899  | 6.0989 | 7.3607  | -1.2618 |
| 1445408_at   | Dnaic2        | dynein, axonemal, intermediate chain 2                                                | BB195298  | 5.0569 | 6.3197  | -1.2627 |
| 1455816_a_at | Kctd3         | potassium channel tetramerisation domain containing 3                                 | BB321232  | 9.9626 | 11.2255 | -1.2629 |
| 1442954_at   |               |                                                                                       | BG069418  | 3.9428 | 5.2060  | -1.2632 |
| 1435946_at   | Sepsecs       | Sep (O-phosphoserine) tRNA:Sec (selenocysteine) tRNA synthase                         | BB401993  | 5.4718 | 6.7354  | -1.2636 |
| 1453374_at   | Zfand5        | zinc finger, AN1-type domain 5                                                        | AW744618  | 4.1803 | 5.4443  | -1.2640 |
| 1448289_at   | Crmp1         | collapsin response mediator protein 1                                                 | AB006714  | 6.1465 | 7.4112  | -1.2647 |
| 1443803_x_at | Hoxa5         | homeobox A5                                                                           | BB388649  | 6.6434 | 7.9081  | -1.2648 |
| 1426526_s_at | Ovgp1         | oviductal glycoprotein 1                                                              | AU017520  | 5.8041 | 7.0690  | -1.2648 |
| 1441806_at   |               |                                                                                       | BF472844  | 4.6942 | 5.9590  | -1.2648 |
| 1436644_x_at | Tmem25        | transmembrane protein 25                                                              | BB245618  | 4.6331 | 5.8980  | -1.2649 |
| 1448124_at   | Gusb          | glucuronidase, beta                                                                   | NM_010368 | 8.6505 | 9.9170  | -1.2665 |
| 1420981_a_at | Lmo4          | LIM domain only 4                                                                     | NM_010723 | 9.4815 | 10.7488 | -1.2672 |
| 1444982_at   | C230007H23Rik | RIKEN cDNA C230007H23 gene                                                            | BB380551  | 4.3588 | 5.6272  | -1.2685 |
| 1437953_at   | Gpcpd1        | glycerophosphocholine phosphodiesterase GDE1 homolog (S. cerevisiae)                  | BM246706  | 3.7420 | 5.0107  | -1.2687 |
| 1449480_at   | Sap18         | Sin3-associated polypeptide 18                                                        | NM_009119 | 6.0047 | 7.2736  | -1.2689 |
| 1426973_at   | Gpr153        | G protein-coupled receptor 153                                                        | AK004377  | 6.0989 | 7.3681  | -1.2692 |
| 1433860_at   | 6030458C11Rik | RIKEN cDNA 6030458C11 gene                                                            | BB126127  | 8.1619 | 9.4316  | -1.2697 |
| 1442100_at   | Inpp5f        | inositol polyphosphate-5-phosphatase F                                                | BB619843  | 6.1749 | 7.4447  | -1.2698 |
| 1428683_at   | Fam173b       | family with sequence similarity 173, member B                                         | AK020868  | 7.4080 | 8.6785  | -1.2705 |
| 1446245_at   |               |                                                                                       | BB042558  | 5.5976 | 6.8688  | -1.2712 |

|              |               |                                                                                          |           |         |         |         |
|--------------|---------------|------------------------------------------------------------------------------------------|-----------|---------|---------|---------|
| 1417431_a_at | Sphk2         | sphingosine kinase 2                                                                     | AF245448  | 5.7781  | 7.0503  | -1.2722 |
| 1458382_a_at |               |                                                                                          | C79035    | 8.2474  | 9.5200  | -1.2727 |
| 1429073_at   | 2210015D19Rik | RIKEN cDNA 2210015D19 gene                                                               | AK005556  | 6.2392  | 7.5121  | -1.2729 |
| 1442397_at   | Nfx1          | nuclear transcription factor, X-box binding 1                                            | BB075045  | 6.2031  | 7.4774  | -1.2743 |
| 1435136_at   | Whsc1         | Wolf-Hirschhorn syndrome candidate 1 (human)                                             | BQ177743  | 7.4596  | 8.7343  | -1.2747 |
| 1422586_at   | Ecel1         | endothelin converting enzyme-like 1                                                      | NM_021306 | 5.5179  | 6.7928  | -1.2749 |
| 1424012_at   | Ttc30a1       | tetratricopeptide repeat domain 30A1                                                     | BC004773  | 3.7936  | 5.0688  | -1.2752 |
| 1438442_at   | Sike1         | suppressor of IKBKE 1                                                                    | AI450236  | 5.5258  | 6.8011  | -1.2753 |
| 1437717_x_at | 2610005L07Rik | cadherin 11 pseudogene                                                                   | BB471300  | 8.6204  | 9.8956  | -1.2753 |
| 1419985_s_at | Ccdc69        | coiled-coil domain containing 69                                                         | C87579    | 5.2822  | 6.5578  | -1.2756 |
| 1452632_at   | Aak1          | AP2 associated kinase 1                                                                  | BG229246  | 5.7369  | 7.0130  | -1.2761 |
| 1434868_at   | 4933431E20Rik | RIKEN cDNA 4933431E20 gene                                                               | AV282706  | 4.6826  | 5.9590  | -1.2765 |
| 1416116_at   | Orc3          | origin recognition complex, subunit 3                                                    | BF161073  | 6.0270  | 7.3037  | -1.2767 |
| 1456739_x_at | Armcx2        | armadillo repeat containing, X-linked 2                                                  | BB392869  | 9.9946  | 11.2731 | -1.2785 |
| 1419915_at   | Nus1          | nuclear undecaprenyl pyrophosphate synthase 1 homolog (S. cerevisiae)                    | AW538011  | 5.1786  | 6.4574  | -1.2788 |
| 1423583_at   | Fem1a         | feminization 1 homolog a (C. elegans)                                                    | AK005041  | 5.8484  | 7.1280  | -1.2796 |
| 1416790_a_at |               |                                                                                          | NM_011561 | 9.2828  | 10.5628 | -1.2800 |
| 1425514_at   | Pik3r1        | phosphatidylinositol 3-kinase, regulatory subunit, polypeptide 1 (p85 alpha)             | M60651    | 6.5351  | 7.8151  | -1.2800 |
| 1426833_at   | Eif4g3        | eukaryotic translation initiation factor 4 gamma, 2                                      | BG073769  | 8.2096  | 9.4896  | -1.2800 |
| 1419798_at   | 2610019E17Rik | RIKEN cDNA 2610019E17 gene                                                               | BF660912  | 5.6402  | 6.9206  | -1.2803 |
| 1455421_x_at | Fam131b       | family with sequence similarity 131, member B                                            | AW490145  | 4.4430  | 5.7245  | -1.2815 |
| 1457789_at   | Cln3          | ceroid lipofuscinosis, neuronal 3, juvenile (Batten, Spielmeyer-Vogt disease)            | AV378786  | 4.4196  | 5.7016  | -1.2820 |
| 1435586_at   | Pcid2         | PCI domain containing 2                                                                  | BB309550  | 7.6668  | 8.9490  | -1.2822 |
| 1431084_x_at | 1810014B01Rik | RIKEN cDNA 1810014B01 gene                                                               | AK012122  | 4.3570  | 5.6402  | -1.2833 |
| 1458308_at   | Sbno2         | strawberry notch homolog 2 (Drosophila)                                                  | BF148215  | 5.9119  | 7.1952  | -1.2833 |
| 1416487_a_at | Yap1          | yes-associated protein 1                                                                 | NM_009534 | 7.0061  | 8.2894  | -1.2833 |
| 1453406_a_at | Rab28         | RAB28, member RAS oncogene family                                                        | AK012286  | 8.6601  | 9.9438  | -1.2837 |
| 1431795_a_at | Sema3b        | sema domain, immunoglobulin domain (Ig), short basic domain, secreted, (semaphorin) 3B   | AK014333  | 5.1383  | 6.4242  | -1.2858 |
| 1448735_at   | Cp            | ceruloplasmin                                                                            | BB332449  | 5.8627  | 7.1496  | -1.2868 |
| 1438201_at   | Pdp1          | pyruvate dehydrogenase phosphatase catalytic subunit 1                                   | AV290622  | 6.7640  | 8.0510  | -1.2870 |
| 1438060_at   | Npas3         | neuronal PAS domain protein 3                                                            | AV226749  | 5.9785  | 7.2656  | -1.2871 |
| 1449229_a_at | Cdkl2         | cyclin-dependent kinase-like 2 (CDC2-related kinase)                                     | NM_016912 | 5.9475  | 7.2349  | -1.2874 |
| 1434169_at   | Kazn          | kazrin, periplakin interacting protein                                                   | BQ175107  | 5.6219  | 6.9094  | -1.2875 |
| 1450913_at   | B4galt6       | UDP-Gal:betaGlcNAc beta 1,4-galactosyltransferase, polypeptide 6                         | BG066773  | 5.6689  | 6.9566  | -1.2877 |
| 1424003_at   | 4930444A02Rik | RIKEN cDNA 4930444A02 gene                                                               | BC027296  | 6.7785  | 8.0672  | -1.2887 |
| 1460566_at   | Mtap1a        | microtubule-associated protein 1 A                                                       | BB765000  | 5.2800  | 6.5695  | -1.2895 |
| 1427410_at   | Dleu2         | deleted in lymphocytic leukemia, 2                                                       | BB812902  | 4.2333  | 5.5236  | -1.2903 |
| 1423169_at   | Taf7          | TAF7 RNA polymerase II, TATA box binding protein (TBP)-associated factor                 | AV213552  | 5.0457  | 6.3376  | -1.2920 |
| 1432885_at   | 4632432E15Rik | RIKEN cDNA 4632432E15 gene                                                               | AK014604  | 4.9278  | 6.2200  | -1.2922 |
| 1435438_at   | Sox8          | SRY-box containing gene 8                                                                | AV345303  | 3.9806  | 5.2732  | -1.2926 |
| 1452695_at   | Erp27         | endoplasmic reticulum protein 27                                                         | AK007684  | 4.1402  | 5.4328  | -1.2926 |
| 1434681_at   | Txlng         | taxilin gamma                                                                            | BG069603  | 6.4183  | 7.7111  | -1.2928 |
| 1432059_x_at | 5031425E22Rik | RIKEN cDNA 5031425E22 gene                                                               | AK017143  | 5.7247  | 7.0175  | -1.2928 |
| 1450850_at   | Ezr           | ezrin                                                                                    | BM119387  | 9.9760  | 11.2692 | -1.2933 |
| 1452752_at   | Lepre1        | leprecan 1                                                                               | BE283629  | 6.5839  | 7.8778  | -1.2939 |
| 1436118_at   | Vangl2        | vang-like 2 (van gogh, Drosophila)                                                       | BB417279  | 5.8877  | 7.1820  | -1.2943 |
| 1433747_at   |               |                                                                                          | BQ176475  | 9.7953  | 11.0898 | -1.2945 |
| 1422827_x_at | Slc35a2       | solute carrier family 35 (UDP-galactose transporter), member A2                          | NM_078484 | 6.7673  | 8.0620  | -1.2947 |
| 1418424_at   | Tnfaip6       | tumor necrosis factor alpha induced protein 6                                            | NM_009398 | 6.3021  | 7.5976  | -1.2954 |
| 1449857_at   | 1200011I18Rik | RIKEN cDNA 1200011I18 gene                                                               | NM_026177 | 4.9243  | 6.2200  | -1.2957 |
| 1453818_a_at | 2210404J11Rik | RIKEN cDNA 2210404J11 gene                                                               | AK019108  | 6.0777  | 7.3736  | -1.2959 |
| 1459448_at   | Cyb5r2        | cytochrome b5 reductase 2                                                                | BB496517  | 4.8229  | 6.1198  | -1.2969 |
| 1444619_x_at | Psmb8         | proteasome (prosome, macropain) subunit, beta type 8 (large multifunctional peptidase 7) | AV068122  | 4.3717  | 5.6689  | -1.2972 |
| 1430252_at   | 3110027N22Rik | RIKEN cDNA 3110027N22 gene                                                               | BB753814  | 4.8017  | 6.0989  | -1.2972 |
| 1437863_at   | Bche          | butyrylcholinesterase                                                                    | BB667762  | 4.0426  | 5.3414  | -1.2988 |
| 1442843_at   | 4933411D12Rik | RIKEN cDNA 4933411D12 gene                                                               | AW555863  | 5.4225  | 6.7217  | -1.2992 |
| 1452664_a_at | Tm7sf3        | transmembrane 7 superfamily member 3                                                     | AK010720  | 9.0015  | 10.3010 | -1.2994 |
| 1449014_at   | Lactb         | lactamase, beta                                                                          | NM_030717 | 7.5175  | 8.8172  | -1.2997 |
| 1433951_at   | Arl5a         | ADP-ribosylation factor-like 5A                                                          | BG064956  | 10.7526 | 12.0525 | -1.2998 |

|              |               |                                                                     |           |         |         |         |
|--------------|---------------|---------------------------------------------------------------------|-----------|---------|---------|---------|
| 1435773_at   | 4930547N16Rik | RIKEN cDNA 4930547N16 gene                                          | BM205349  | 7.8696  | 9.1696  | -1.3000 |
| 1451159_at   | Arhgef12      | Rho guanine nucleotide exchange factor (GEF) 12                     | AF467766  | 8.2386  | 9.5389  | -1.3003 |
| 1441994_at   | Pcdhb16       | protocadherin beta 16                                               | BB131219  | 4.0049  | 5.3054  | -1.3005 |
| 1418313_at   | Zfp276        | zinc finger protein (C2H2 type) 276                                 | BB667131  | 6.5142  | 7.8151  | -1.3009 |
| 1448067_at   |               |                                                                     | BF146656  | 5.0544  | 6.3554  | -1.3009 |
| 1428134_at   | Coq9          | coenzyme Q9 homolog (yeast)                                         | AK004527  | 8.6578  | 9.9594  | -1.3017 |
| 1452933_at   | Ankrd39       | ankyrin repeat domain 39                                            | AK018681  | 6.4528  | 7.7553  | -1.3024 |
| 1422432_at   | Dbi           | diazepam binding inhibitor                                          | NM_007830 | 11.3822 | 12.6848 | -1.3026 |
| 1435539_at   | Htt           | huntingtin                                                          | BE947966  | 6.6421  | 7.9457  | -1.3036 |
| 1424796_at   | 1700054N08Rik | RIKEN cDNA 1700054N08 gene                                          | BC024705  | 6.4073  | 7.7111  | -1.3038 |
| 1455887_at   | Alg8          | asparagine-linked glycosylation 8 (alpha-1,3-glucosyltransferase)   | BM249614  | 7.5169  | 8.8208  | -1.3039 |
| 1443157_at   |               |                                                                     | BB470847  | 4.2115  | 5.5154  | -1.3039 |
| 1424634_at   | Tceal1        | transcription elongation factor A (SII)-like 1                      | BC011290  | 5.4443  | 6.7488  | -1.3044 |
| 1435403_at   | 1700007L15Rik | RIKEN cDNA 1700007L15 gene                                          | AV039549  | 5.6689  | 6.9733  | -1.3044 |
| 1422698_s_at | Jarid2        | jumonji, AT rich interactive domain 2                               | NM_021878 | 7.5613  | 8.8659  | -1.3045 |
| 1436440_at   | Slc25a12      | solute carrier family 25 (mitochondrial carrier, Aralar), member 12 | BB303952  | 5.0544  | 6.3591  | -1.3047 |
| 1419115_at   | Alg14         | asparagine-linked glycosylation 14                                  | AA198774  | 6.8765  | 8.1826  | -1.3061 |
| 1452335_at   | Mfsd8         | major facilitator superfamily domain containing 8                   | AV024565  | 5.0666  | 6.3729  | -1.3063 |
| 1429360_at   | Klf3          | Kruppel-like factor 3 (basic)                                       | AK007959  | 6.8852  | 8.1923  | -1.3071 |
| 1428540_at   | Fam115a       | family with sequence similarity 115, member A                       | BE944524  | 7.0916  | 8.3989  | -1.3073 |
| 1434068_s_at | AI662270      | expressed sequence AI662270                                         | BE688410  | 8.7410  | 10.0488 | -1.3077 |
| 1449334_at   | Timp3         | tissue inhibitor of metalloproteinase 3                             | BI111620  | 7.5874  | 8.8954  | -1.3081 |
| 1429241_at   | Nipal3        | NIPA-like domain containing 3                                       | AK018640  | 4.1689  | 5.4771  | -1.3082 |
| 1435572_at   | 2310014L17Rik | RIKEN cDNA 2310014L17 gene                                          | AV232798  | 5.1086  | 6.4175  | -1.3089 |
| 1425201_a_at | Hyi           | hydroxypyruvate isomerase homolog (E. coli)                         | BC024619  | 6.9029  | 8.2121  | -1.3092 |
| 1431007_at   | Gm3435        | predicted gene 3435                                                 | AA153045  | 7.4683  | 8.7782  | -1.3099 |
| 1441570_at   |               |                                                                     | BB066943  | 3.7444  | 5.0544  | -1.3100 |
| 1434117_at   | Tceb3         | transcription elongation factor B (SIII), polypeptide 3             | AV264059  | 7.5295  | 8.8399  | -1.3103 |
| 1459630_at   |               |                                                                     | BM122487  | 4.6015  | 5.9119  | -1.3104 |
| 1447816_x_at | Oxad1         | oxidoreductase NAD-binding domain containing 1                      | BB059395  | 7.5050  | 8.8177  | -1.3126 |
| 1455089_at   | Gng12         | guanine nucleotide binding protein (G protein), gamma 12            | AW228775  | 9.1553  | 10.4682 | -1.3128 |
| 1455403_at   | Manea         | mannosidase, endo-alpha                                             | BB035197  | 7.5587  | 8.8720  | -1.3133 |
| 1455352_at   | U2surp        | U2 snRNP-associated SURP domain containing                          | AV340615  | 6.9948  | 8.3084  | -1.3136 |
| 1417480_at   | Fbxo9         | f-box protein 9                                                     | NM_023605 | 7.5262  | 8.8399  | -1.3137 |
| 1427319_at   | A230046K03Rik | RIKEN cDNA A230046K03 gene                                          | AI607603  | 7.2821  | 8.5959  | -1.3138 |
| 1457587_at   | Kcnq5         | potassium voltage-gated channel, subfamily Q, member 5              | BB196645  | 4.7207  | 6.0353  | -1.3146 |
| 1438730_at   | Nav1          | neuron navigator 1                                                  | BB431371  | 6.0062  | 7.3208  | -1.3146 |
| 1445518_at   |               |                                                                     | BG061923  | 4.2050  | 5.5196  | -1.3147 |
| 1434260_at   | Fchsd2        | FCH and double SH3 domains 2                                        | BB461848  | 8.0521  | 9.3668  | -1.3147 |
| 1424916_x_at | Zfp764        | zinc finger protein 764                                             | BC026397  | 5.7245  | 7.0394  | -1.3149 |
| 1416289_at   | Plod1         | procollagen-lysine, 2-oxoglutarate 5-dioxygenase 1                  | NM_011122 | 7.6667  | 8.9817  | -1.3150 |
| 1454831_at   | Foxn2         | forkhead box N2                                                     | AV221013  | 8.9864  | 10.3021 | -1.3157 |
| 1450974_at   | Timp4         | tissue inhibitor of metalloproteinase 4                             | BI788452  | 5.6400  | 6.9566  | -1.3166 |
| 1456103_at   | Pml           | promyelocytic leukemia                                              | BB667149  | 6.3214  | 7.6381  | -1.3167 |
| 1437071_at   | Eif1ax        | eukaryotic translation initiation factor 1A, X-linked               | BB471576  | 7.1334  | 8.4502  | -1.3168 |
| 1455592_at   | Vangl2        | vang-like 2 (van gogh, Drosophila)                                  | BM211048  | 5.0665  | 6.3844  | -1.3179 |
| 1418004_a_at | Tmem176b      | transmembrane protein 176B                                          | NM_023056 | 9.2464  | 10.5647 | -1.3182 |
| 1448985_at   | Dusp22        | dual specificity phosphatase 22                                     | NM_134068 | 6.5593  | 7.8778  | -1.3185 |
| 1422610_s_at | Igf2bp3       | insulin-like growth factor 2 mRNA binding protein 3                 | NM_023670 | 8.3517  | 9.6712  | -1.3195 |
| 1419058_at   | Polr1e        | polymerase (RNA) I polypeptide E                                    | NM_022811 | 6.7280  | 8.0480  | -1.3201 |
| 1440086_at   | Rnf182        | ring finger protein 182                                             | BB428822  | 5.9357  | 7.2562  | -1.3206 |
| 1428795_at   | 1110021L09Rik | RIKEN cDNA 1110021L09 gene                                          | BB767129  | 6.9720  | 8.2941  | -1.3221 |
| 1416492_at   | Ccne1         | cyclin E1                                                           | NM_007633 | 7.5844  | 8.9068  | -1.3223 |
| 1450980_at   | Gtpbp3        | GTP binding protein 3                                               | BM207274  | 7.4066  | 8.7321  | -1.3255 |
| 1428222_at   | Dclk2         | doublecortin-like kinase 2                                          | AK018179  | 5.7246  | 7.0503  | -1.3257 |
| 1450027_at   | Sdc3          | syndecan 3                                                          | BB528350  | 7.0061  | 8.3319  | -1.3258 |
| 1421251_at   | Zfp40         | zinc finger protein 40                                              | NM_009555 | 4.0156  | 5.3414  | -1.3258 |
| 1434479_at   | Col5a1        | collagen, type V, alpha 1                                           | AV246911  | 7.8115  | 9.1383  | -1.3268 |
| 1428288_at   | Klf9          | Kruppel-like factor 9                                               | AW488885  | 9.1129  | 10.4397 | -1.3268 |

|              |               |                                                                                                                                      |           |         |         |         |
|--------------|---------------|--------------------------------------------------------------------------------------------------------------------------------------|-----------|---------|---------|---------|
| 1424748_at   | Galnt11       | UDP-N-acetyl-alpha-D-galactosamine:polypeptide N-acetylgalactosaminyltransferase 11                                                  | BC021504  | 7.4518  | 8.7788  | -1.3270 |
| 1432524_at   | 4930550G17Rik | RIKEN cDNA 4930550G17 gene                                                                                                           | AK016085  | 3.9024  | 5.2306  | -1.3282 |
| 1418677_at   | Actn3         | actinin alpha 3                                                                                                                      | NM_013456 | 4.6074  | 5.9357  | -1.3282 |
| 1432238_at   | Spats1        | spermatogenesis associated, serine-rich 1                                                                                            | AK005865  | 4.9109  | 6.2392  | -1.3283 |
| 1450135_at   | Fzd3          | frizzled homolog 3 (Drosophila)                                                                                                      | AU043193  | 5.5405  | 6.8688  | -1.3284 |
| 1434568_at   |               |                                                                                                                                      | BG065425  | 5.8297  | 7.1586  | -1.3289 |
| 1437066_at   | Zbtb20        | zinc finger and BTB domain containing 20                                                                                             | BQ174376  | 6.1404  | 7.4693  | -1.3289 |
| 1436388_a_at | 3830406C13Rik | RIKEN cDNA 3830406C13 gene                                                                                                           | BB763097  | 7.2802  | 8.6106  | -1.3304 |
| 1449303_at   | Sesn3         | sestrin 3                                                                                                                            | NM_030261 | 7.4909  | 8.8240  | -1.3331 |
| 1447426_at   |               |                                                                                                                                      | BF465664  | 4.9249  | 6.2582  | -1.3332 |
| 1436896_at   | Ints9         | integrator complex subunit 9                                                                                                         | AV304373  | 7.4517  | 8.7853  | -1.3336 |
| 1426522_at   | Hadhb         | hydroxyacyl-Coenzyme A dehydrogenase/3-ketoacyl-Coenzyme A thiolase/enoyl-Coenzyme A hydratase (trifunctional protein), beta subunit | BG866501  | 9.1365  | 10.4707 | -1.3342 |
| 1418755_at   | Tbx15         | T-box 15                                                                                                                             | NM_009323 | 6.5400  | 7.8745  | -1.3345 |
| 1422573_at   | Ampd3         | adenosine monophosphate deaminase 3                                                                                                  | D85596    | 6.1807  | 7.5154  | -1.3346 |
| 1452005_at   | Dlat          | dihydrolipoamide S-acetyltransferase (E2 component of pyruvate dehydrogenase)                                                        | AV336908  | 6.8057  | 8.1406  | -1.3349 |
| 1454759_at   | Git1          | G protein-coupled receptor kinase-interactor 1                                                                                       | AV230461  | 7.4140  | 8.7495  | -1.3355 |
| 1424293_s_at | Tmem55a       | transmembrane protein 55A                                                                                                            | BC021435  | 9.9742  | 11.3098 | -1.3356 |
| 1424913_at   | 2310044G17Rik | RIKEN cDNA 2310044G17 gene                                                                                                           | AK009800  | 3.9697  | 5.3054  | -1.3357 |
| 1437743_at   | Aebp2         | AE binding protein 2                                                                                                                 | BM242614  | 7.3346  | 8.6708  | -1.3362 |
| 1418386_at   | N6amt2        | N-6 adenine-specific DNA methyltransferase 2 (putative)                                                                              | NM_026526 | 8.3516  | 9.6880  | -1.3364 |
| 1457367_at   |               |                                                                                                                                      | BB667309  | 4.1035  | 5.4400  | -1.3365 |
| 1456300_at   | Ilvbl         | ilvB (bacterial acetolactate synthase)-like                                                                                          | AV290889  | 5.7245  | 7.0611  | -1.3366 |
| 1460122_at   | Tmem41b       | transmembrane protein 41B                                                                                                            | BB734748  | 6.4367  | 7.7740  | -1.3373 |
| 1445436_at   | Szt2          | seizure threshold 2                                                                                                                  | AV175285  | 5.8112  | 7.1485  | -1.3373 |
| 1425792_a_at | Rorc          | RAR-related orphan receptor gamma                                                                                                    | AJ132394  | 3.8342  | 5.1719  | -1.3376 |
| 1422527_at   | H2-DMa        | histocompatibility 2, class II, locus DMA                                                                                            | NM_010386 | 5.3414  | 6.6801  | -1.3387 |
| 1439570_at   | Fam59b        | family with sequence similarity 59, member B                                                                                         | BE957162  | 4.9195  | 6.2582  | -1.3387 |
| 1455667_at   | Preb          | prolactin regulatory element binding                                                                                                 | AV362891  | 4.9195  | 6.2582  | -1.3387 |
| 1417582_s_at | Dhodh         | dihydroorotate dehydrogenase                                                                                                         | NM_020046 | 7.4124  | 8.7511  | -1.3387 |
| 1437303_at   | Il6st         | interleukin 6 signal transducer                                                                                                      | BI102913  | 8.4424  | 9.7817  | -1.3393 |
| 1424413_at   | Ogfrl1        | opioid growth factor receptor-like 1                                                                                                 | BE650508  | 4.5722  | 5.9119  | -1.3397 |
| 1427145_at   | Iqsec1        | IQ motif and Sec7 domain 1                                                                                                           | BF164393  | 6.2831  | 7.6236  | -1.3405 |
| 1428897_at   | 2610029I01Rik | RIKEN cDNA 2610029I01 gene                                                                                                           | AK011611  | 7.2750  | 8.6155  | -1.3405 |
| 1425208_at   | Lbh           | limb-bud and heart                                                                                                                   | BC026827  | 5.7092  | 7.0509  | -1.3417 |
| 1424608_a_at |               |                                                                                                                                      | BM225255  | 7.5897  | 8.9314  | -1.3417 |
| 1433771_at   | Fam108b       | family with sequence similarity 108, member B                                                                                        | AV173092  | 9.2765  | 10.6183 | -1.3418 |
| 1449122_at   | Ubx2b         | UBX domain protein 2B                                                                                                                | NM_026534 | 4.9957  | 6.3376  | -1.3419 |
| 1436811_at   | Kctd3         | potassium channel tetramerisation domain containing 3                                                                                | AV232970  | 8.5048  | 9.8469  | -1.3421 |
| 1452527_a_at | P2rx4         | purinergic receptor P2X, ligand-gated ion channel 4                                                                                  | AJ251462  | 7.3455  | 8.6884  | -1.3429 |
| 1434498_at   | Gm1673        | predicted gene 1673                                                                                                                  | BE626727  | 7.7582  | 9.1012  | -1.3430 |
| 1451483_s_at | 1700054N08Rik | RIKEN cDNA 1700054N08 gene                                                                                                           | BC024705  | 7.0755  | 8.4187  | -1.3432 |
| 1455915_at   | Galnt4        | UDP-N-acetyl-alpha-D-galactosamine:polypeptide N-acetylgalactosaminyltransferase 4                                                   | BF583094  | 5.9590  | 7.3026  | -1.3436 |
| 1430034_at   | Cct4          | chaperonin containing Tcp1, subunit 4 (delta)                                                                                        | BE648588  | 5.0037  | 6.3476  | -1.3439 |
| 1453025_at   | MacroD2       | MACRO domain containing 2                                                                                                            | AK011824  | 4.4754  | 5.8193  | -1.3440 |
| 1422571_at   | Thbs2         | thrombospondin 2                                                                                                                     | NM_011581 | 10.7222 | 12.0662 | -1.3440 |
| 1437449_at   | Rsad1         | radical S-adenosyl methionine domain containing 1                                                                                    | BB818348  | 6.4641  | 7.8087  | -1.3446 |
| 1439807_at   | Tmem74        | transmembrane protein 74                                                                                                             | BB816169  | 5.0107  | 6.3554  | -1.3446 |
| 1438666_at   | Ldlrad3       | low density lipoprotein receptor class A domain containing 3                                                                         | BB534423  | 7.6738  | 9.0192  | -1.3454 |
| 1455419_at   | D630045J12Rik | RIKEN cDNA D630045J12 gene                                                                                                           | BB503889  | 7.6211  | 8.9675  | -1.3464 |
| 1418681_at   | Alg13         | asparagine-linked glycosylation 13                                                                                                   | NM_026247 | 6.0300  | 7.3774  | -1.3474 |
| 1448380_at   | Lgals3bp      | lectin, galactoside-binding, soluble, 3 binding protein                                                                              | NM_011150 | 8.5861  | 9.9342  | -1.3482 |
| 1456818_at   | Stk32a        | serine/threonine kinase 32A                                                                                                          | BB279083  | 4.7135  | 6.0619  | -1.3484 |
| 1418577_at   | Trim8         | tripartite motif-containing 8                                                                                                        | BG063064  | 7.4875  | 8.8374  | -1.3499 |
| 1424068_at   | Tcta          | T cell leukemia translocation altered gene                                                                                           | BC019397  | 4.8036  | 6.1537  | -1.3501 |
| 1430758_x_at | Bcas1         | breast carcinoma amplified sequence 1                                                                                                | AK020254  | 4.4702  | 5.8214  | -1.3512 |
| 1449188_at   | Midn          | midnolin                                                                                                                             | NM_021565 | 8.4671  | 9.8183  | -1.3512 |

|              |               |                                                                                        |           |         |         |         |
|--------------|---------------|----------------------------------------------------------------------------------------|-----------|---------|---------|---------|
| 1452480_at   | 4930529M08Rik | RIKEN cDNA 4930529M08 gene                                                             | BC024760  | 4.0928  | 5.4443  | -1.3515 |
| 1439777_at   | Celf2         | CUGBP, Elav-like family member 2                                                       | BB308170  | 3.9166  | 5.2685  | -1.3518 |
| 1455413_at   | Zfp11         | zinc finger protein 11                                                                 | BB053703  | 5.2361  | 6.5881  | -1.3520 |
| 1424112_at   | Igf2r         | insulin-like growth factor 2 receptor                                                  | BG092290  | 9.6984  | 11.0518 | -1.3534 |
| 1447894_x_at | Vps52         | vacuolar protein sorting 52 (yeast)                                                    | BB429200  | 6.8729  | 8.2266  | -1.3537 |
| 1443640_at   | Zfp882        | zinc finger protein 882                                                                | BB831078  | 3.9401  | 5.2939  | -1.3538 |
| 1459636_at   | Angpt2        | angiopoietin 2                                                                         | BB745769  | 4.0861  | 5.4404  | -1.3543 |
| 1428573_at   | Chn2          | chimerin (chimaerin) 2                                                                 | AK006398  | 3.6732  | 5.0277  | -1.3545 |
| 1425156_at   | Gbp7          | guanylate binding protein 7                                                            | BC010229  | 8.5970  | 9.9516  | -1.3546 |
| 1460634_at   | Ralgds        | ral guanine nucleotide dissociation stimulator                                         | NM_009058 | 7.5067  | 8.8629  | -1.3563 |
| 1429590_at   | Tacc1         | transforming, acidic coiled-coil containing protein 1                                  | BE862546  | 8.0581  | 9.4148  | -1.3567 |
| 1448982_at   | Klk6          | kallikrein related-peptidase 6                                                         | NM_011177 | 4.4211  | 5.7781  | -1.3570 |
| 1430303_at   | Ccdc41        | coiled-coil domain containing 41                                                       | AI465236  | 5.5917  | 6.9490  | -1.3574 |
| 1435361_at   | Sema3g        | sema domain, immunoglobulin domain (Ig), short basic domain, secreted, (semaphorin) 3G | BB535044  | 4.1932  | 5.5508  | -1.3575 |
| 1436210_at   | Gk5           | glycerol kinase 5 (putative)                                                           | AV095337  | 5.6689  | 7.0284  | -1.3595 |
| 1439651_at   |               |                                                                                        | AV370006  | 5.0970  | 6.4574  | -1.3604 |
| 1435437_at   | Setd7         | SET domain containing (lysine methyltransferase) 7                                     | BM114815  | 8.4953  | 9.8562  | -1.3610 |
| 1431255_at   | Calr3         | calreticulin 3                                                                         | AI324734  | 5.7658  | 7.1280  | -1.3622 |
| 1422924_at   | Tnfsf9        | tumor necrosis factor (ligand) superfamily, member 9                                   | NM_009404 | 6.6423  | 8.0049  | -1.3626 |
| 1434455_at   | Fbxo44        | F-box protein 44                                                                       | AV174662  | 6.4242  | 7.7871  | -1.3629 |
| 1452770_at   | Vkorc1        | vitamin K epoxide reductase complex, subunit 1                                         | AK003237  | 9.5873  | 10.9505 | -1.3632 |
| 1450932_s_at | Dock9         | dedicator of cytokinesis 9                                                             | BB795072  | 8.7410  | 10.1046 | -1.3636 |
| 1451400_at   | Gemin8        | gem (nuclear organelle) associated protein 8                                           | BC023488  | 7.9268  | 9.2913  | -1.3645 |
| 1448698_at   | Ccnd1         | cyclin D1                                                                              | NM_007631 | 11.4920 | 12.8569 | -1.3650 |
| 1448020_at   | Rap1a         | RAS-related protein-1a                                                                 | AA210264  | 7.9260  | 9.2912  | -1.3652 |
| 1454032_at   | Neto2         | neuropilin (NRP) and tolloid (TLL)-like 2                                              | AK017458  | 4.4723  | 5.8382  | -1.3659 |
| 1439097_at   |               |                                                                                        | BM239519  | 5.4899  | 6.8564  | -1.3666 |
| 1434920_a_at | Evl           | Ena-vasodilator stimulated phosphoprotein                                              | AW553781  | 6.8057  | 8.1726  | -1.3669 |
| 1452848_at   |               |                                                                                        | BB023525  | 7.9756  | 9.3425  | -1.3669 |
| 1444723_at   | 6530418L21Rik | RIKEN cDNA 6530418L21 gene                                                             | BB049759  | 4.5708  | 5.9378  | -1.3670 |
| 1449281_at   | Nrtn          | neurturin                                                                              | NM_008738 | 7.0503  | 8.4173  | -1.3670 |
| 1435333_at   | Ndufaf4       | NADH dehydrogenase (ubiquinone) 1 alpha subcomplex, assembly factor 4                  | AV156568  | 7.6809  | 9.0487  | -1.3677 |
| 1422123_s_at |               |                                                                                        | NM_011926 | 5.1858  | 6.5541  | -1.3684 |
| 1452159_at   | 2310001A20Rik | RIKEN cDNA 2310001A20 gene                                                             | AJ310638  | 7.8748  | 9.2437  | -1.3688 |
| 1459835_s_at | Dnaja1        | DnaJ (Hsp40) homolog, subfamily A, member 1                                            | BB414617  | 8.9005  | 10.2698 | -1.3693 |
| 1440153_at   |               |                                                                                        | AI854555  | 4.6127  | 5.9820  | -1.3693 |
| 1427342_at   | Fastkd1       | FAST kinase domains 1                                                                  | BC023501  | 7.1845  | 8.5541  | -1.3696 |
| 1455508_at   | Slc35e2       | solute carrier family 35, member E2                                                    | BF318246  | 8.2581  | 9.6279  | -1.3698 |
| 1452694_at   | Ipk1          | inositol hexaphosphate kinase 1                                                        | AK004808  | 8.2105  | 9.5803  | -1.3699 |
| 1443248_at   | Tmco3         | transmembrane and coiled-coil domains 3                                                | BB668030  | 4.4196  | 5.7905  | -1.3709 |
| 1419460_at   | Rpp14         | ribonuclease P 14 subunit (human)                                                      | BI455861  | 7.3594  | 8.7307  | -1.3713 |
| 1426278_at   | Ifi2712a      | interferon, alpha-inducible protein 27 like 2A                                         | AY090098  | 10.5545 | 11.9258 | -1.3713 |
| 1454623_at   | Cpa2          | carboxypeptidase A2, pancreatic                                                        | BG141511  | 5.2415  | 6.6129  | -1.3714 |
| 1452093_at   | Tmem185b      | transmembrane protein 185B                                                             | AK010846  | 7.5380  | 8.9095  | -1.3715 |
| 1431726_a_at | Tmem80        | transmembrane protein 80                                                               | AK017460  | 5.5094  | 6.8811  | -1.3717 |
| 1429759_at   | Rps6ka6       | ribosomal protein S6 kinase polypeptide 6                                              | BB449218  | 6.0989  | 7.4713  | -1.3724 |
| 1448993_at   | Atg3          | autophagy related 3                                                                    | BC010809  | 10.0896 | 11.4623 | -1.3727 |
| 1419620_at   | Pttg1         | pituitary tumor-transforming gene 1                                                    | NM_013917 | 6.6707  | 8.0433  | -1.3727 |
| 1418322_at   | Crem          | cAMP responsive element modulator                                                      | AI467599  | 4.9526  | 6.3262  | -1.3736 |
| 1435421_at   | Fsd1          | fibronectin type 3 and SPRY domain-containing protein                                  | BQ175318  | 6.9508  | 8.3245  | -1.3737 |
| 1434935_at   | Aak1          | AP2 associated kinase 1                                                                | BG067888  | 9.9790  | 11.3532 | -1.3742 |
| 1441980_at   | Tbck          | TBC1 domain containing kinase                                                          | BB355593  | 6.2392  | 7.6138  | -1.3746 |
| 1424304_at   | Tpcn2         | two pore segment channel 2                                                             | BC025890  | 5.6757  | 7.0503  | -1.3746 |
| 1434557_at   | Hip1          | huntingtin interacting protein 1                                                       | BB794880  | 7.1259  | 8.5007  | -1.3748 |
| 1439050_at   | Gclm          | glutamate-cysteine ligase, modifier subunit                                            | BB258019  | 6.8564  | 8.2314  | -1.3750 |
| 1451860_a_at | Trim30a       | tripartite motif-containing 30A                                                        | AF220015  | 7.5278  | 8.9035  | -1.3757 |
| 1437132_x_at | Nedd9         | neural precursor cell expressed, developmentally down-regulated gene 9                 | BB535494  | 8.3874  | 9.7635  | -1.3762 |
| 1422127_at   | Dhh           | desert hedgehog                                                                        | NM_007857 | 5.0500  | 6.4265  | -1.3766 |
| 1423170_at   | Taf7          | TAF7 RNA polymerase II, TATA box binding protein (TBP)-associated factor               | AV213552  | 5.7714  | 7.1485  | -1.3771 |
| 1444443_at   |               |                                                                                        | AV228095  | 5.9357  | 7.3130  | -1.3773 |

|              |               |                                                                                        |           |         |         |         |
|--------------|---------------|----------------------------------------------------------------------------------------|-----------|---------|---------|---------|
| 1453481_at   | Zdhhc2        | zinc finger, DHHC domain containing 2                                                  | BB342242  | 4.8229  | 6.2005  | -1.3776 |
| 1459882_at   |               |                                                                                        | AV312905  | 4.2333  | 5.6110  | -1.3777 |
| 1432156_a_at | Rnf32         | ring finger protein 32                                                                 | AK012288  | 4.7207  | 6.0989  | -1.3782 |
| 1418302_at   | Ppt2          | palmitoyl-protein thioesterase 2                                                       | BC013462  | 8.4592  | 9.8374  | -1.3783 |
| 1445574_at   |               |                                                                                        | BG067678  | 5.1633  | 6.5424  | -1.3791 |
| 1436048_at   | Exoc8         | exocyst complex component 8                                                            | BG074367  | 6.8965  | 8.2755  | -1.3791 |
| 1447191_at   | Dip2b         | DIP2 disco-interacting protein 2 homolog B (Drosophila)                                | AI875120  | 3.6732  | 5.0544  | -1.3813 |
| 1444028_s_at | Dock9         | dedicator of cytokinesis 9                                                             | AA410148  | 9.0160  | 10.3986 | -1.3826 |
| 1448271_a_at | Ddx21         | DEAD (Asp-Glu-Ala-Asp) box polypeptide 21                                              | BM246099  | 7.8997  | 9.2827  | -1.3830 |
| 1415897_a_at | Mgst1         | microsomal glutathione S-transferase 1                                                 | BI150149  | 9.1082  | 10.4919 | -1.3837 |
| 1434500_at   | Ttyh2         | tweety homolog 2 (Drosophila)                                                          | BF585303  | 8.4507  | 9.8359  | -1.3852 |
| 1448407_at   | 4632428N05Rik | RIKEN cDNA 4632428N05 gene                                                             | BC003967  | 5.5112  | 6.8973  | -1.3861 |
| 1433992_at   | Shroom2       | shroom family member 2                                                                 | BQ176992  | 7.2165  | 8.6044  | -1.3879 |
| 1423010_at   | Sacs          | sacsin                                                                                 | NM_015788 | 5.1383  | 6.5268  | -1.3885 |
| 1433576_at   | Mat2a         | methionine adenosyltransferase II, alpha                                               | BG065061  | 8.3716  | 9.7608  | -1.3892 |
| 1458706_at   |               |                                                                                        | AW494074  | 5.3321  | 6.7217  | -1.3896 |
| 1457568_at   | Hnrnpd        | heterogeneous nuclear ribonucleoprotein D                                              | BB380198  | 5.8373  | 7.2276  | -1.3903 |
| 1416328_a_at | Atp6v0e       | ATPase, H <sup>+</sup> transporting, lysosomal V0 subunit E                            | NM_025272 | 10.5808 | 11.9720 | -1.3912 |
| 1441680_at   |               |                                                                                        | BM117447  | 5.4771  | 6.8688  | -1.3917 |
| 1436595_at   | Rbm34         | RNA binding motif protein 34                                                           | AV328743  | 7.2710  | 8.6628  | -1.3918 |
| 1428277_at   | Otud6b        | OTU domain containing 6B                                                               | AK011203  | 8.4803  | 9.8722  | -1.3919 |
| 1432431_s_at | MacroD2       | MACRO domain containing 2                                                              | AK004072  | 6.3197  | 7.7121  | -1.3924 |
| 1422149_at   | Foxo4         | forkhead box O4                                                                        | AB032770  | 5.5405  | 6.9332  | -1.3927 |
| 1427514_at   | LOC624295     | uncharacterized LOC624295                                                              | BC019591  | 5.8632  | 7.2562  | -1.3931 |
| 1427347_s_at | Tubb2a        | tubulin, beta 2A class IIA                                                             | BC003475  | 9.9258  | 11.3190 | -1.3932 |
| 1418289_at   | Nes           | nestin                                                                                 | AI413223  | 7.9977  | 9.3913  | -1.3936 |
| 1442203_at   | Gm2a          | GM2 ganglioside activator protein                                                      | BB028429  | 4.9247  | 6.3197  | -1.3950 |
| 1438701_at   | Bicd1         | bicaudal D homolog 1 (Drosophila)                                                      | BB130665  | 5.6110  | 7.0061  | -1.3951 |
| 1428598_at   | Tbc1d7        | TBC1 domain family, member 7                                                           | AK011356  | 7.5693  | 8.9645  | -1.3952 |
| 1430989_a_at | 1700020114Rik | RIKEN cDNA 1700020114 gene                                                             | AK006166  | 6.5679  | 7.9631  | -1.3952 |
| 1439450_x_at | A230046K03Rik | RIKEN cDNA A230046K03 gene                                                             | BB267264  | 8.0161  | 9.4114  | -1.3953 |
| 1440975_at   | Mxra7         | matrix-remodelling associated 7                                                        | BB275943  | 8.2786  | 9.6746  | -1.3959 |
| 1452921_at   |               |                                                                                        | AK006992  | 5.6970  | 7.0932  | -1.3962 |
| 1452433_at   |               |                                                                                        | BB662083  | 6.8057  | 8.2023  | -1.3966 |
| 1417924_at   | Pak3          | p21 protein (Cdc42/Rac)-activated kinase 3                                             | BQ174935  | 4.4902  | 5.8877  | -1.3975 |
| 1439771_s_at | D13Ert608e    | DNA segment, Chr 13, ERATO Doi 608, expressed                                          | BG070246  | 4.8568  | 6.2550  | -1.3982 |
| 1451048_at   | Metap2        | methionine aminopeptidase 2                                                            | BG086961  | 3.7934  | 5.1918  | -1.3983 |
| 1441174_a_at | Lmln          | leishmanolysin-like (metallopeptidase M8 family)                                       | BB182358  | 4.2674  | 5.6675  | -1.4001 |
| 1455466_at   | Gpr133        | G protein-coupled receptor 133                                                         | BB548889  | 4.7807  | 6.1807  | -1.4001 |
| 1451604_a_at | Acvr1l        | activin A receptor, type II-like 1                                                     | BC014291  | 4.3780  | 5.7781  | -1.4001 |
| 1435275_at   | Cox6b2        | cytochrome c oxidase subunit VIb polypeptide 2                                         | AV013496  | 6.9152  | 8.3155  | -1.4003 |
| 1427469_at   | Helz          | helicase with zinc finger domain                                                       | BI251153  | 5.9849  | 7.3855  | -1.4006 |
| 1417136_s_at | Srpk2         | serine/arginine-rich protein specific kinase 2                                         | NM_009274 | 9.0367  | 10.4380 | -1.4013 |
| 1437089_at   | Pyroxd2       | pyridine nucleotide-disulphide oxidoreductase domain 2                                 | AV223337  | 4.5566  | 5.9590  | -1.4025 |
| 1428614_at   | Ldhd          | lactate dehydrogenase D                                                                | AW105779  | 4.9219  | 6.3249  | -1.4030 |
| 1449249_at   | Pcdh7         | protocadherin 7                                                                        | NM_018764 | 5.4276  | 6.8313  | -1.4037 |
| 1456341_a_at | Klf9          | Kruppel-like factor 9                                                                  | AV354744  | 9.7625  | 11.1665 | -1.4041 |
| 1435400_at   | Efha2         | EF-hand domain family, member A2                                                       | BF462791  | 6.9845  | 8.3903  | -1.4058 |
| 1439512_at   | 5830444B04Rik | RIKEN cDNA 5830444B04 gene                                                             | BB029399  | 4.1751  | 5.5812  | -1.4061 |
| 1415853_at   | Def8          | differentially expressed in FDCP 8                                                     | NM_054046 | 7.2244  | 8.6313  | -1.4069 |
| 1421456_at   | P2ry1         | purinergic receptor P2Y, G-protein coupled 1                                           | NM_008772 | 4.3711  | 5.7781  | -1.4069 |
| 1425937_a_at | Hexim1        | hexamethylene bis-acetamide inducible 1                                                | BC022111  | 8.8357  | 10.2438 | -1.4081 |
| 1424544_at   | Nrbp2         | nuclear receptor binding protein 2                                                     | BC012437  | 5.9590  | 7.3681  | -1.4091 |
| 1435089_at   | 2010111101Rik | RIKEN cDNA 2010111101 gene                                                             | BI157086  | 7.1741  | 8.5841  | -1.4099 |
| 1439780_at   | Rpl71l        | ribosomal protein L7-like 1                                                            | BG071958  | 6.7532  | 8.1632  | -1.4100 |
| 1430128_a_at | Reep6         | receptor accessory protein 6                                                           | AK002562  | 6.2636  | 7.6739  | -1.4103 |
| 1457709_a_at | A930005H10Rik | RIKEN cDNA A930005H10 gene                                                             | BF318375  | 4.7495  | 6.1607  | -1.4112 |
| 1453958_at   | 2610203C22Rik | RIKEN cDNA 2610203C22 gene                                                             | AK011866  | 3.6732  | 5.0850  | -1.4118 |
| 1416644_a_at | Sema3b        | sema domain, immunoglobulin domain (Ig), short basic domain, secreted, (semaphorin) 3B | NM_009153 | 5.6916  | 7.1037  | -1.4121 |
| 1419465_at   | Nkd2          | naked cuticle 2 homolog (Drosophila)                                                   | BC019952  | 5.4318  | 6.8439  | -1.4121 |
| 1460295_s_at | Il6st         | interleukin 6 signal transducer                                                        | AA717838  | 5.2957  | 6.7079  | -1.4122 |
| 1429337_at   | Tmem87b       | transmembrane protein 87B                                                              | BB161454  | 5.2545  | 6.6686  | -1.4141 |

|              |               |                                                                                                  |           |        |         |         |
|--------------|---------------|--------------------------------------------------------------------------------------------------|-----------|--------|---------|---------|
| 1444018_at   |               |                                                                                                  | BB794854  | 4.6127 | 6.0270  | -1.4142 |
| 1439511_at   | Cdk7          | cyclin-dependent kinase 7                                                                        | AV234027  | 6.5962 | 8.0105  | -1.4144 |
| 1446835_at   |               |                                                                                                  | BB042551  | 5.9674 | 7.3820  | -1.4146 |
| 1428851_at   | 1300014I06Rik | RIKEN cDNA 1300014I06 gene                                                                       | AK005003  | 9.4174 | 10.8336 | -1.4162 |
| 1419125_at   | Ptpn18        | protein tyrosine phosphatase, non-receptor type 18                                               | NM_011206 | 6.3015 | 7.7180  | -1.4165 |
| 1432558_a_at | Mal           | myelin and lymphocyte protein, T cell differentiation protein                                    | AK019046  | 5.7515 | 7.1687  | -1.4171 |
| 1460434_at   | Fundc2        | FUN14 domain containing 2                                                                        | AI510221  | 7.3931 | 8.8107  | -1.4176 |
| 1449098_a_at | Poli          | polymerase (DNA directed), iota                                                                  | NM_011972 | 6.0270 | 7.4447  | -1.4177 |
| 1417888_at   | Trim13        | tripartite motif-containing 13                                                                   | NM_023233 | 6.7928 | 8.2113  | -1.4185 |
| 1455034_at   | Nr4a2         | nuclear receptor subfamily 4, group A, member 2                                                  | BB703394  | 6.3554 | 7.7740  | -1.4186 |
| 1416049_at   | Gldc          | glycine decarboxylase                                                                            | NM_138595 | 4.6798 | 6.0989  | -1.4191 |
| 1453391_at   |               |                                                                                                  | AK016255  | 4.7207 | 6.1404  | -1.4197 |
| 1417946_at   | Abhd3         | abhydrolase domain containing 3                                                                  | NM_134130 | 4.2333 | 5.6531  | -1.4198 |
| 1460179_at   | Dnaja1        | DnaJ (Hsp40) homolog, subfamily A, member 1                                                      | BF141076  | 9.8037 | 11.2241 | -1.4205 |
| 1423584_at   |               |                                                                                                  | AI481026  | 4.3574 | 5.7781  | -1.4206 |
| 1418510_s_at | Fbxo8         | F-box protein 8                                                                                  | NM_015791 | 7.7028 | 9.1238  | -1.4210 |
| 1435525_at   | Kctd17        | potassium channel tetramerisation domain containing 17                                           | BI408602  | 8.6720 | 10.0944 | -1.4224 |
| 1439847_s_at | Klf12         | Kruppel-like factor 12                                                                           | BM249597  | 4.4671 | 5.8896  | -1.4225 |
| 1436028_at   | Tmem33        | transmembrane protein 33                                                                         | BB795429  | 8.8013 | 10.2242 | -1.4229 |
| 1430045_at   | Tsnax         | translin-associated factor X                                                                     | BM119928  | 4.2966 | 5.7200  | -1.4234 |
| 1422787_at   | Fkbp1         | FK506 binding protein-like                                                                       | NM_019873 | 6.1528 | 7.5765  | -1.4237 |
| 1423421_at   | Ankrd49       | ankyrin repeat domain 49                                                                         | BB233668  | 6.8564 | 8.2802  | -1.4238 |
| 1423802_at   | Camkv         | CaM kinase-like vesicle-associated                                                               | BC017634  | 4.6674 | 6.0922  | -1.4247 |
| 1436051_at   | Myo5a         | myosin VA                                                                                        | BQ174518  | 7.8877 | 9.3125  | -1.4248 |
| 1424086_at   | Oaf           | OAF homolog (Drosophila)                                                                         | BC025514  | 9.2198 | 10.6463 | -1.4265 |
| 1446951_at   | P4ha3         | procollagen-proline, 2-oxoglutarate 4-dioxygenase (proline 4-hydroxylase), alpha polypeptide III | BB526042  | 4.9453 | 6.3729  | -1.4276 |
| 1416147_at   | Hspa4         | heat shock protein 4                                                                             | BE912771  | 7.7503 | 9.1779  | -1.4276 |
| 1434287_at   | Agpat5        | 1-acylglycerol-3-phosphate O-acyltransferase 5 (lysophosphatidic acid acyltransferase, epsilon)  | BG065500  | 7.1187 | 8.5464  | -1.4277 |
| 1436324_at   | Stard9        | START domain containing 9                                                                        | BB427728  | 5.5091 | 6.9371  | -1.4280 |
| 1434585_at   | Tulp4         | tubby like protein 4                                                                             | BB667130  | 8.5118 | 9.9401  | -1.4283 |
| 1439323_a_at | Map4k1        | mitogen-activated protein kinase kinase kinase 1                                                 | BB546619  | 6.1555 | 7.5840  | -1.4285 |
| 1435781_at   | Cand1         | cullin associated and neddylation disassociated 1                                                | BB380335  | 5.9357 | 7.3649  | -1.4292 |
| 1437556_at   | Zfx4          | zinc finger homeodomain 4                                                                        | BF147593  | 3.8014 | 5.2306  | -1.4293 |
| 1441961_at   | Mtap9         | microtubule-associated protein 9                                                                 | BB698742  | 5.0970 | 6.5268  | -1.4299 |
| 1449072_a_at | N6amt2        | N-6 adenine-specific DNA methyltransferase 2 (putative)                                          | NM_026526 | 8.2615 | 9.6924  | -1.4309 |
| 1447691_x_at |               |                                                                                                  | BB470306  | 5.0558 | 6.4898  | -1.4341 |
| 1454909_at   | Tacc1         | transforming, acidic coiled-coil containing protein 1                                            | BQ176888  | 7.8998 | 9.3344  | -1.4345 |
| 1452393_at   | Akna          | AT-hook transcription factor                                                                     | BB014626  | 5.3141 | 6.7488  | -1.4347 |
| 1435852_at   | Spred3        | sprouty-related, EVH1 domain containing 3                                                        | BB459220  | 5.6782 | 7.1129  | -1.4347 |
| 1424810_at   | Tasp1         | taspase, threonine aspartase 1                                                                   | BC005776  | 6.6697 | 8.1053  | -1.4356 |
| 1428192_at   | Kbtbd7        | kelch repeat and BTB (POZ) domain containing 7                                                   | AK003597  | 4.5566 | 5.9922  | -1.4356 |
| 1426932_at   | D19Bwg1357e   | DNA segment, Chr 19, Brigham & Women's Genetics 1357 expressed                                   | AI314709  | 6.6474 | 8.0833  | -1.4359 |
| 1451409_at   | 2210021J22Rik | RIKEN cDNA 2210021J22 gene                                                                       | BC025858  | 6.5697 | 8.0057  | -1.4360 |
| 1416023_at   | Fabp3         | fatty acid binding protein 3, muscle and heart                                                   | NM_010174 | 5.4203 | 6.8564  | -1.4362 |
| 1439738_at   | Mettl13       | methyltransferase like 13                                                                        | BB756081  | 4.6127 | 6.0489  | -1.4362 |
| 1434298_at   | Zeb2          | zinc finger E-box binding homeobox 2                                                             | BQ174116  | 6.9450 | 8.3817  | -1.4368 |
| 1418346_at   | Insl6         | insulin-like 6                                                                                   | NM_013754 | 6.4073 | 7.8447  | -1.4374 |
| 1434266_at   | Fam185a       | family with sequence similarity 185, member A                                                    | AI847670  | 7.8623 | 9.3004  | -1.4381 |
| 1429247_at   | Anxa6         | annexin A6                                                                                       | AK013026  | 4.8844 | 6.3232  | -1.4388 |
| 1424607_a_at | Gm4354        | predicted gene 4354                                                                              | BM225255  | 9.6950 | 11.1343 | -1.4393 |
| 1424373_at   | Armcx3        | armadillo repeat containing, X-linked 3                                                          | AK004598  | 8.2023 | 9.6421  | -1.4397 |
| 1424004_x_at | 4930444A02Rik | RIKEN cDNA 4930444A02 gene                                                                       | BC027296  | 6.7665 | 8.2072  | -1.4407 |
| 1432590_at   | 4930573O21Rik | RIKEN cDNA 4930573O21 gene                                                                       | AW912387  | 3.9701 | 5.4108  | -1.4407 |
| 1430394_a_at | Abcb9         | ATP-binding cassette, sub-family B (MDR/TAP), member 9                                           | AK020749  | 4.5643 | 6.0068  | -1.4426 |
| 1448214_at   | Pdhb          | pyruvate dehydrogenase (lipoamide) beta                                                          | AK011810  | 5.8041 | 7.2467  | -1.4426 |
| 1451349_at   | Efcab7        | EF-hand calcium binding domain 7                                                                 | BC020077  | 7.4828 | 8.9264  | -1.4436 |



|              |               |                                                                                                 |           |         |         |         |
|--------------|---------------|-------------------------------------------------------------------------------------------------|-----------|---------|---------|---------|
| 1442434_at   | D8Erttd82e    | DNA segment, Chr 8, ERATO D0182,<br>expressed                                                   | BM195829  | 7.4774  | 8.9215  | -1.4440 |
| 1416192_at   | Napa          | N-ethylmaleimide sensitive fusion protein<br>attachment protein alpha                           | BC004804  | 5.6593  | 7.1037  | -1.4445 |
| 1433453_a_at | Abtb2         | ankyrin repeat and BTB (POZ) domain<br>containing 2                                             | BB621938  | 8.3257  | 9.7717  | -1.4460 |
| 1417071_s_at | Cyp4v3        | cytochrome P450, family 4, subfamily v,<br>polypeptide 3                                        | NM_133969 | 3.5710  | 5.0177  | -1.4467 |
| 1455380_at   | Pcyox1l       | prenylcysteine oxidase 1 like                                                                   | BB433166  | 5.6031  | 7.0503  | -1.4472 |
| 1434809_at   | Arhgap28      | Rho GTPase activating protein 28                                                                | BB458819  | 7.3700  | 8.8177  | -1.4477 |
| 1452679_at   | Tubb2b        | tubulin, beta 2B class IIB                                                                      | AA986082  | 10.0360 | 11.4843 | -1.4483 |
| 1436657_at   | Gm11744       | predicted gene 11744                                                                            | AW060253  | 5.1639  | 6.6129  | -1.4490 |
| 1425893_a_at | Fhit          | fragile histidine triad gene                                                                    | AF055573  | 4.0704  | 5.5196  | -1.4492 |
| 1423669_at   | Col1a1        | collagen, type I, alpha 1                                                                       | U08020    | 4.9915  | 6.4409  | -1.4494 |
| 1424843_a_at | Gas5          | growth arrest specific 5                                                                        | BC004622  | 8.5126  | 9.9642  | -1.4516 |
| 1419308_at   | Invs          | inversin                                                                                        | NM_010569 | 5.4443  | 6.8973  | -1.4530 |
| 1431145_a_at | Cuedc2        | CUE domain containing 2                                                                         | AK003457  | 8.9545  | 10.4075 | -1.4530 |
| 1438676_at   | Gbp6          | guanylate binding protein 6                                                                     | BM241485  | 6.1234  | 7.5765  | -1.4531 |
| 1426952_at   | Arhgap18      | Rho GTPase activating protein 18                                                                | BB667215  | 7.5915  | 9.0459  | -1.4544 |
| 1431178_at   | Ulp1          | UL16 binding protein 1                                                                          | BF016392  | 4.6674  | 6.1224  | -1.4549 |
| 1456773_at   | Nupl2         | nucleoporin like 2                                                                              | BB396657  | 5.3054  | 6.7621  | -1.4567 |
| 1426631_at   | Pus7          | pseudouridylate synthase 7 homolog (S.<br>cerevisiae)                                           | BM199125  | 9.4164  | 10.8737 | -1.4573 |
| 1443923_at   | Akap13        | A kinase (PRKA) anchor protein 13                                                               | BB011550  | 6.0489  | 7.5097  | -1.4607 |
| 1444450_at   | Rab42-ps      | RAB42, member RAS oncogene family,<br>pseudogene                                                | BB124025  | 4.0579  | 5.5191  | -1.4611 |
| 1456218_at   | Snx22         | sorting nexin 22                                                                                | AV333851  | 5.4836  | 6.9450  | -1.4613 |
| 1460596_at   | Agtrap        | angiotensin II, type I receptor-associated protein                                              | BI648497  | 7.3026  | 8.7645  | -1.4618 |
| 1460700_at   | Stat3         | signal transducer and activator of transcription 3                                              | AK004083  | 8.2051  | 9.6675  | -1.4624 |
| 1431179_at   | Entpd7        | ectonucleoside triphosphate<br>diphosphohydrolase 7                                             | BB873170  | 5.7257  | 7.1886  | -1.4629 |
| 1438868_at   |               |                                                                                                 | AV280841  | 7.6739  | 9.1409  | -1.4670 |
| 1435500_at   | Rab26         | RAB26, member RAS oncogene family                                                               | BB270778  | 5.3765  | 6.8439  | -1.4674 |
| 1454857_at   | Rnf122        | ring finger protein 122                                                                         | AW551457  | 6.6045  | 8.0726  | -1.4680 |
| 1434958_at   | Sacs          | sacsin                                                                                          | BG075163  | 7.3806  | 8.8493  | -1.4686 |
| 1439278_at   | Zbtb20        | zinc finger and BTB domain containing 20                                                        | BB175650  | 5.7781  | 7.2467  | -1.4687 |
| 1448308_at   | Ap3m1         | adaptor-related protein complex 3, mu 1 subunit                                                 | AF242857  | 8.3349  | 9.8045  | -1.4696 |
| 1426397_at   | Tgfr2         | transforming growth factor, beta receptor II                                                    | BG793483  | 8.7794  | 10.2492 | -1.4699 |
| 1449008_at   | Tulp3         | tubby-like protein 3                                                                            | NM_011657 | 9.7095  | 11.1796 | -1.4702 |
| 1433796_at   | Endod1        | endonuclease domain containing 1                                                                | BI734389  | 5.4108  | 6.8811  | -1.4703 |
| 1441501_at   | Serbp1        | serpine1 mRNA binding protein 1                                                                 | AV382262  | 5.4108  | 6.8811  | -1.4703 |
| 1440786_x_at | Sfxn2         | sideroflexin 2                                                                                  | BB377927  | 4.4409  | 5.9119  | -1.4710 |
| 1429115_at   | 2010003O02Rik | RIKEN cDNA 2010003O02 gene                                                                      | AK008077  | 6.9835  | 8.4548  | -1.4713 |
| 1457038_at   | Frem2         | Fras1 related extracellular matrix protein 2                                                    | BM201912  | 3.5815  | 5.0544  | -1.4730 |
| 1415780_a_at | Armxc2        | armadillo repeat containing, X-linked 2                                                         | NM_026139 | 8.8430  | 10.3161 | -1.4731 |
| 1435746_at   | Srpk2         | serine/arginine-rich protein specific kinase 2                                                  | BB127386  | 7.1458  | 8.6192  | -1.4734 |
| 1435000_at   | Gspt1         | G1 to S phase transition 1                                                                      | AW537663  | 7.2876  | 8.7611  | -1.4735 |
| 1429268_at   | 2610318N02Rik | RIKEN cDNA 2610318N02 gene                                                                      | AK012048  | 5.8057  | 7.2793  | -1.4736 |
| 1419914_s_at | Nus1          | nuclear undecaprenyl pyrophosphate synthase<br>1 homolog (S. cerevisiae)                        | AW538011  | 9.4815  | 10.9575 | -1.4759 |
| 1434511_at   | Phkb          | phosphorylase kinase beta                                                                       | BM233125  | 8.2165  | 9.6924  | -1.4760 |
| 1455991_at   | Ccbl2         | cysteine conjugate-beta lyase 2                                                                 | BG094881  | 6.4242  | 7.9021  | -1.4780 |
| 1425804_at   | Hmx2          | H6 homeobox 2                                                                                   | BC023402  | 5.3778  | 6.8564  | -1.4786 |
| 1435229_at   | Gramd1b       | GRAM domain containing 1B                                                                       | BI729743  | 4.8229  | 6.3015  | -1.4786 |
| 1456552_at   | Foxl2os       | forkhead box L2 opposite strand transcript                                                      | BB021606  | 3.6732  | 5.1519  | -1.4787 |
| 1456423_at   | Mbd5          | methyl-CpG binding domain protein 5                                                             | AV298746  | 4.3588  | 5.8382  | -1.4794 |
| 1460329_at   | B4galt6       | UDP-Gal:betaGlcNAc beta 1,4-<br>galactosyltransferase, polypeptide 6                            | BG066773  | 7.6002  | 9.0798  | -1.4796 |
| 1438443_at   | Zbtb20        | zinc finger and BTB domain containing 20                                                        | BB751546  | 7.4502  | 8.9300  | -1.4799 |
| 1418902_at   | Chid1         | chitinase domain containing 1                                                                   | BC006876  | 5.9004  | 7.3808  | -1.4804 |
| 1439966_x_at | Sfxn2         | sideroflexin 2                                                                                  | AV213621  | 5.7245  | 7.2050  | -1.4805 |
| 1458543_at   |               |                                                                                                 | AI585995  | 4.2283  | 5.7092  | -1.4809 |
| 1433722_at   | Akap13        | A kinase (PRKA) anchor protein 13                                                               | AV304590  | 8.1009  | 9.5829  | -1.4820 |
| 1422150_at   | Hmx3          | H6 homeobox 3                                                                                   | NM_008257 | 4.8009  | 6.2831  | -1.4822 |
| 1421038_a_at | Kcnn4         | potassium intermediate/small conductance<br>calcium-activated channel, subfamily N,<br>member 4 | NM_008433 | 8.7755  | 10.2579 | -1.4824 |
| 1415677_at   | Dhrs1         | dehydrogenase/reductase (SDR family)<br>member 1                                                | NM_026819 | 8.9121  | 10.3950 | -1.4829 |
| 1454666_at   | Klf3          | Kruppel-like factor 3 (basic)                                                                   | AV230488  | 8.6313  | 10.1144 | -1.4831 |

|              |               |                                                                                                                |           |        |         |         |
|--------------|---------------|----------------------------------------------------------------------------------------------------------------|-----------|--------|---------|---------|
| 1418860_a_at | Letmd1        | LETM1 domain containing 1                                                                                      | NM_134093 | 5.1319 | 6.6167  | -1.4848 |
| 1451577_at   | Zbtb20        | zinc finger and BTB domain containing 20                                                                       | AW491109  | 6.3911 | 7.8778  | -1.4867 |
| 1441949_x_at | Slc39a6       | solute carrier family 39 (metal ion transporter), member 6                                                     | BB213740  | 5.4443 | 6.9332  | -1.4889 |
| 1435194_at   | Hspa4         | heat shock protein 4                                                                                           | AW909503  | 8.0903 | 9.5807  | -1.4904 |
| 1417539_at   | Slc35a1       | solute carrier family 35 (CMP-sialic acid transporter), member 1                                               | NM_011895 | 7.4584 | 8.9494  | -1.4910 |
| 1440383_at   | Dclre1b       | DNA cross-link repair 1B, PSO2 homolog (S. cerevisiae)                                                         | BB763339  | 5.3765 | 6.8688  | -1.4923 |
| 1427620_at   | Cul9          | cullin 9                                                                                                       | BC026469  | 4.5566 | 6.0489  | -1.4924 |
| 1458193_at   | Pmp2          | peripheral myelin protein 2                                                                                    | AV278565  | 4.9056 | 6.3980  | -1.4924 |
| 1455132_at   | Rasa3         | RAS protein activator like 3                                                                                   | AV312663  | 4.8858 | 6.3787  | -1.4929 |
| 1435477_s_at | Fcgr2b        | Fc receptor, IgG, low affinity IIb                                                                             | BM224327  | 3.6037 | 5.0970  | -1.4933 |
| 1434881_s_at | Kctd12        | potassium channel tetramerisation domain containing 12                                                         | BM220945  | 3.5172 | 5.0107  | -1.4935 |
| 1416374_at   | Ap3m1         | adaptor-related protein complex 3, mu 1 subunit                                                                | AF242857  | 7.0061 | 8.5007  | -1.4946 |
| 1459961_a_at | Stat3         | signal transducer and activator of transcription 3                                                             | BG069527  | 5.4561 | 6.9518  | -1.4957 |
| 1438132_at   | Gm5089        | predicted gene 5089                                                                                            | BB355326  | 3.7349 | 5.2306  | -1.4957 |
| 1417642_at   | Aldh1a3       | aldehyde dehydrogenase family 1, subfamily A3                                                                  | AF253409  | 4.8229 | 6.3197  | -1.4968 |
| 1425788_a_at | Echdc2        | enoyl Coenzyme A hydratase domain containing 2                                                                 | BC025104  | 5.5877 | 7.0852  | -1.4975 |
| 1436082_at   |               |                                                                                                                | BE992058  | 5.8877 | 7.3855  | -1.4978 |
| 1452461_a_at | Gnptab        | N-acetylglucosamine-1-phosphate transferase, alpha and beta subunits                                           | L36434    | 5.1148 | 6.6129  | -1.4980 |
| 1455228_at   | Whsc1         | Wolf-Hirschhorn syndrome candidate 1 (human)                                                                   | BQ177743  | 8.0779 | 9.5778  | -1.4999 |
| 1417135_at   | Srpk2         | serine/arginine-rich protein specific kinase 2                                                                 | NM_009274 | 9.4836 | 10.9850 | -1.5015 |
| 1426448_at   | Pja1          | praja1, RING-H2 motif containing                                                                               | BM199789  | 6.5991 | 8.1009  | -1.5018 |
| 1426022_a_at | Vill          | villin-like                                                                                                    | BC021808  | 6.0625 | 7.5645  | -1.5020 |
| 1422785_at   | Rasa2         | RAS p21 protein activator 2                                                                                    | NM_053268 | 8.4941 | 9.9965  | -1.5024 |
| 1449371_at   | Hars2         | histidyl-tRNA synthetase 2, mitochondrial (putative)                                                           | NM_080636 | 5.0544 | 6.5578  | -1.5034 |
| 1423083_at   | Rab33b        | RAB33B, member of RAS oncogene family                                                                          | AK004974  | 8.4317 | 9.9360  | -1.5043 |
| 1443201_at   |               |                                                                                                                | BM119078  | 3.9065 | 5.4108  | -1.5043 |
| 1436465_at   | Klh1          | kelch-like 1 (Drosophila)                                                                                      | BE947032  | 3.9701 | 5.4745  | -1.5044 |
| 1446155_at   | 2700089E24Rik | RIKEN cDNA 2700089E24 gene                                                                                     | BB046613  | 3.9701 | 5.4759  | -1.5058 |
| 1419013_at   | Gpatch1       | G patch domain containing 1                                                                                    | NM_026181 | 6.9947 | 8.5007  | -1.5060 |
| 1453091_s_at | Letmd1        | LETM1 domain containing 1                                                                                      | BB241583  | 5.8877 | 7.3941  | -1.5064 |
| 1422673_at   | Prkd1         | protein kinase D1                                                                                              | NM_008858 | 5.6110 | 7.1176  | -1.5066 |
| 1426494_at   | Trmt10b       | tRNA methyltransferase 10 homolog B (S. cerevisiae)                                                            | AV161118  | 6.6707 | 8.1776  | -1.5070 |
| 1425067_at   | Celsr3        | cadherin, EGF LAG seven-pass G-type receptor 3 (flamingo homolog, Drosophila)                                  | AF427498  | 4.9337 | 6.4409  | -1.5072 |
| 1434989_at   |               |                                                                                                                | BQ176485  | 4.6531 | 6.1607  | -1.5076 |
| 1435092_at   | Arl4a         | ADP-ribosylation factor-like 4A                                                                                | AV328143  | 3.9024 | 5.4107  | -1.5083 |
| 1456860_at   | Cdc26         | cell division cycle 26                                                                                         | BB761356  | 4.2431 | 5.7515  | -1.5084 |
| 1418984_at   | Inadl         | InaD-like (Drosophila)                                                                                         | AV287690  | 4.5684 | 6.0777  | -1.5094 |
| 1429050_at   | Chic2         | cysteine-rich hydrophobic domain 2                                                                             | AK015681  | 8.2314 | 9.7414  | -1.5099 |
| 1460577_at   | Jmy           | junction-mediating and regulatory protein                                                                      | BQ031479  | 8.2016 | 9.7140  | -1.5125 |
| 1451199_at   | Qtrtd1        | queuine tRNA-ribosyltransferase domain containing 1                                                            | BC017628  | 7.5278 | 9.0404  | -1.5126 |
| 1433705_at   | Zfp213        | zinc finger protein 213                                                                                        | BG066277  | 5.3685 | 6.8811  | -1.5126 |
| 1460740_at   | Cltb          | clathrin, light polypeptide (Lcb)                                                                              | AK009844  | 7.0095 | 8.5231  | -1.5136 |
| 1418619_at   | Icam5         | intercellular adhesion molecule 5, telencephalin                                                               | NM_008319 | 5.8968 | 7.4112  | -1.5143 |
| 1422561_at   | Adamts5       | a disintegrin-like and metalloproteinase (reprolysin type) with thrombospondin type 1 motif, 5 (aggrecanase-2) | BB658835  | 4.4663 | 5.9820  | -1.5157 |
| 1419686_at   | Tsga14        | testis specific gene A14                                                                                       | NM_031998 | 5.0107 | 6.5268  | -1.5161 |
| 1451749_at   | Irak4         | interleukin-1 receptor-associated kinase 4                                                                     | BM220651  | 5.4707 | 6.9887  | -1.5180 |
| 1452633_s_at | Aak1          | AP2 associated kinase 1                                                                                        | BG229246  | 7.6386 | 9.1566  | -1.5180 |
| 1447471_at   |               |                                                                                                                | AW112074  | 6.1147 | 7.6329  | -1.5182 |
| 1437065_at   | Zbtb20        | zinc finger and BTB domain containing 20                                                                       | BQ174376  | 6.1264 | 7.6454  | -1.5190 |
| 1424475_at   | Camkk2        | calcium/calmodulin-dependent protein kinase kinase 2, beta                                                     | BI157430  | 6.5587 | 8.0779  | -1.5192 |
| 1433517_at   | Myeov2        | myeloma overexpressed 2                                                                                        | BE945188  | 5.3494 | 6.8688  | -1.5194 |
| 1427951_s_at | Ccdc28a       | coiled-coil domain containing 28A                                                                              | BG141739  | 5.9357 | 7.4557  | -1.5200 |
| 1450931_at   | Dock9         | dedicator of cytokinesis 9                                                                                     | BB795072  | 7.1343 | 8.6566  | -1.5223 |
| 1427535_s_at | Obs1          | obscurin-like 1                                                                                                | BC025848  | 5.9217 | 7.4447  | -1.5229 |
| 1423902_s_at | Arhgef12      | Rho guanine nucleotide exchange factor (GEF) 12                                                                | AF467766  | 8.8720 | 10.3950 | -1.5230 |

|              |               |                                                                                                                  |           |         |         |         |
|--------------|---------------|------------------------------------------------------------------------------------------------------------------|-----------|---------|---------|---------|
| 1416662_at   | Sardh         | sarcosine dehydrogenase                                                                                          | BI217574  | 5.9965  | 7.5200  | -1.5235 |
| 1435186_s_at | Lrrcc1        | leucine rich repeat and coiled-coil domain containing 1                                                          | BF466265  | 5.4443  | 6.9682  | -1.5238 |
| 1416263_at   | Abcb9         | ATP-binding cassette, sub-family B (MDR/TAP), member 9                                                           | AB045382  | 4.7588  | 6.2831  | -1.5243 |
| 1440206_at   | A930024E05Rik | RIKEN cDNA A930024E05 gene                                                                                       | BB250208  | 4.7766  | 6.3015  | -1.5249 |
| 1454067_a_at | 4931406C07Rik | RIKEN cDNA 4931406C07 gene                                                                                       | AK016432  | 7.1176  | 8.6446  | -1.5270 |
| 1423395_at   | Tsnax         | translin-associated factor X                                                                                     | BM021706  | 8.0444  | 9.5715  | -1.5271 |
| 1418917_at   | Hebp2         | heme binding protein 2                                                                                           | NM_019487 | 5.2346  | 6.7621  | -1.5275 |
| 1428704_at   | Zfp661        | zinc finger protein 661                                                                                          | BB065039  | 4.6530  | 6.1807  | -1.5277 |
| 1416083_at   | Zfand5        | zinc finger, AN1-type domain 5                                                                                   | AA124553  | 9.7937  | 11.3217 | -1.5280 |
| 1440184_at   |               |                                                                                                                  | BB021877  | 3.5815  | 5.1109  | -1.5295 |
| 1456004_x_at | Iapp          | islet amyloid polypeptide                                                                                        | BB434117  | 4.9965  | 6.5268  | -1.5303 |
| 1456620_at   | Gnptab        | N-acetylglucosamine-1-phosphate transferase, alpha and beta subunits                                             | BE944732  | 6.4210  | 7.9515  | -1.5305 |
| 1448681_at   | Il15ra        | interleukin 15 receptor, alpha chain                                                                             | NM_133836 | 4.7084  | 6.2392  | -1.5308 |
| 1430352_at   | Adamts9       | a disintegrin-like and metalloproteinase (reprolysin type) with thrombospondin type 1 motif, 9                   | BG141912  | 5.0107  | 6.5424  | -1.5317 |
| 1428410_at   | Naa50         | N(alpha)-acetyltransferase 50, NatE catalytic subunit                                                            | AK013287  | 8.3585  | 9.8906  | -1.5321 |
| 1428748_at   | Zfp826        | zinc finger protein 826                                                                                          | BM202530  | 5.1239  | 6.6564  | -1.5326 |
| 1423284_at   | Mansc1        | MANSC domain containing 1                                                                                        | AK002644  | 3.6719  | 5.2056  | -1.5337 |
| 1424111_at   | Igf2r         | insulin-like growth factor 2 receptor                                                                            | BG092290  | 8.1009  | 9.6349  | -1.5340 |
| 1448875_at   | Zhx1          | zinc fingers and homeoboxes 1                                                                                    | NM_009572 | 8.4758  | 10.0120 | -1.5362 |
| 1430286_s_at |               |                                                                                                                  | AK013448  | 8.3344  | 9.8707  | -1.5363 |
| 1418563_at   | Serbp1        | serpine1 mRNA binding protein 1                                                                                  | BC006030  | 8.9249  | 10.4634 | -1.5385 |
| 1439971_at   | 6330439K17Rik | RIKEN cDNA 6330439K17 gene                                                                                       | AV328193  | 3.9348  | 5.4735  | -1.5387 |
| 1417622_at   | Slc12a2       | solute carrier family 12, member 2                                                                               | BG069505  | 9.5200  | 11.0588 | -1.5387 |
| 1448707_at   | Taf13         | TAF13 RNA polymerase II, TATA box binding protein (TBP)-associated factor                                        | NM_025444 | 8.9760  | 10.5149 | -1.5390 |
| 1435161_at   | Sepsecs       | Sep (O-phosphoserine) tRNA:Sec (selenocysteine) tRNA synthase                                                    | BM243223  | 6.9449  | 8.4847  | -1.5397 |
| 1424609_a_at | Gm4354        | predicted gene 4354                                                                                              | BM225255  | 9.7294  | 11.2692 | -1.5398 |
| 1420824_at   | Sema4d        | sema domain, immunoglobulin domain (Ig), transmembrane domain (TM) and short cytoplasmic domain, (semaphorin) 4D | AV256403  | 6.2879  | 7.8280  | -1.5401 |
| 1418634_at   | Notch1        | notch 1                                                                                                          | NM_008714 | 7.8447  | 9.3849  | -1.5402 |
| 1429859_a_at | Arl2bp        | ADP-ribosylation factor-like 2 binding protein                                                                   | AK006418  | 8.9421  | 10.4823 | -1.5403 |
| 1451019_at   | Ctsf          | cathepsin F                                                                                                      | AK017474  | 5.0325  | 6.5730  | -1.5405 |
| 1418312_at   | Zfp276        | zinc finger protein (C2H2 type) 276                                                                              | BB667131  | 6.2392  | 7.7805  | -1.5413 |
| 1438195_at   | Gpd1l         | glycerol-3-phosphate dehydrogenase 1-like                                                                        | BB727537  | 6.7665  | 8.3083  | -1.5417 |
| 1418888_a_at | Sepx1         | selenoprotein X 1                                                                                                | NM_013759 | 7.9861  | 9.5279  | -1.5418 |
| 1427910_at   | Cst6          | cystatin E/M                                                                                                     | AK003744  | 6.4963  | 8.0382  | -1.5419 |
| 1439632_at   | Gnb4          | guanine nucleotide binding protein (G protein), beta 4                                                           | BQ174397  | 5.8877  | 7.4299  | -1.5421 |
| 1421152_a_at | Gnao1         | guanine nucleotide binding protein, alpha O                                                                      | NM_010308 | 5.3909  | 6.9332  | -1.5423 |
| 1430238_at   | Got1l1        | glutamic-oxaloacetic transaminase 1-like 1                                                                       | AK006984  | 4.5566  | 6.0989  | -1.5423 |
| 1460084_at   |               |                                                                                                                  | BB473929  | 4.2088  | 5.7515  | -1.5428 |
| 1447885_x_at | Nedd9         | neural precursor cell expressed, developmentally down-regulated gene 9                                           | BB450608  | 4.9828  | 6.5268  | -1.5440 |
| 1449037_at   | Crem          | cAMP responsive element modulator                                                                                | AI467599  | 5.0120  | 6.5578  | -1.5458 |
| 1455181_at   | Rasa2         | RAS p21 protein activator 2                                                                                      | BM228516  | 8.3560  | 9.9027  | -1.5467 |
| 1460615_at   | Nt5dc1        | 5'-nucleotidase domain containing 1                                                                              | BM228837  | 6.8189  | 8.3672  | -1.5483 |
| 1416888_at   | Fadd          | Fas (TNFRSF6)-associated via death domain                                                                        | BC021400  | 6.6801  | 8.2302  | -1.5502 |
| 1456574_at   | Zfp800        | zinc finger protein 800                                                                                          | BB224546  | 5.6841  | 7.2348  | -1.5507 |
| 1457766_at   | Wfdc6a        | WAP four-disulfide core domain 6A                                                                                | AV378987  | 4.4791  | 6.0322  | -1.5531 |
| 1420630_at   | 8430419L09Rik | RIKEN cDNA 8430419L09 gene                                                                                       | NM_028982 | 6.2200  | 7.7740  | -1.5540 |
| 1433645_at   |               |                                                                                                                  | BM207133  | 9.9675  | 11.5215 | -1.5540 |
| 1437753_at   | 6230409E13Rik | RIKEN cDNA 6230409E13 gene                                                                                       | BE987651  | 5.2534  | 6.8075  | -1.5541 |
| 1448715_x_at |               |                                                                                                                  | NM_010490 | 12.0905 | 13.6461 | -1.5555 |
| 1417623_at   | Slc12a2       | solute carrier family 12, member 2                                                                               | BG069505  | 8.1907  | 9.7463  | -1.5556 |
| 1431398_at   |               |                                                                                                                  | AK012902  | 5.1383  | 6.6941  | -1.5557 |
| 1440090_at   |               |                                                                                                                  | BB475037  | 4.7725  | 6.3286  | -1.5561 |
| 1450177_at   | Ngfr          | nerve growth factor receptor (TNFR superfamily, member 16)                                                       | BI151406  | 5.7456  | 7.3017  | -1.5561 |
| 1443978_at   | Ankle1        | ankyrin repeat and LEM domain containing 1                                                                       | BB407885  | 6.0351  | 7.5915  | -1.5564 |
| 1452958_at   | Asphd2        | aspartate beta-hydroxylase domain containing 2                                                                   | AK013495  | 4.9694  | 6.5268  | -1.5575 |
| 1455316_x_at | BC094435      | cDNA sequence BC094435                                                                                           | AI987693  | 11.7546 | 13.3123 | -1.5578 |

|              |               |                                                                                                                  |           |         |         |         |
|--------------|---------------|------------------------------------------------------------------------------------------------------------------|-----------|---------|---------|---------|
| 1435758_at   | B4galt6       | UDP-Gal:betaGlcNAc beta 1,4-galactosyltransferase, polypeptide 6                                                 | BI685536  | 7.4502  | 9.0109  | -1.5607 |
| 1418326_at   | Slc7a5        | solute carrier family 7 (cationic amino acid transporter, y+ system), member 5                                   | BC026131  | 10.1681 | 11.7290 | -1.5609 |
| 1436094_at   | Vgf           | VGF nerve growth factor inducible                                                                                | BF458396  | 4.9124  | 6.4737  | -1.5613 |
| 1431372_at   | Srpk2         | serine/arginine-rich protein specific kinase 2                                                                   | AK014004  | 5.5130  | 7.0744  | -1.5614 |
| 1418955_at   | Zfp93         | zinc finger protein 93                                                                                           | NM_009567 | 5.4443  | 7.0061  | -1.5617 |
| 1449916_at   | Pbx4          | pre B cell leukemia homeobox 4                                                                                   | NM_030555 | 4.9959  | 6.5578  | -1.5619 |
| 1447544_at   |               |                                                                                                                  | BB486335  | 5.4771  | 7.0394  | -1.5623 |
| 1450859_s_at |               |                                                                                                                  | AK009276  | 7.5043  | 9.0675  | -1.5632 |
| 1422744_at   | Phka1         | phosphorylase kinase alpha 1                                                                                     | NM_008832 | 5.3054  | 6.8688  | -1.5634 |
| 1436426_at   | Cc2d2a        | coiled-coil and C2 domain containing 2A                                                                          | BF464165  | 6.4242  | 7.9877  | -1.5635 |
| 1420640_at   | Jmy           | junction-mediating and regulatory protein                                                                        | BF227962  | 6.0343  | 7.5990  | -1.5647 |
| 1437867_at   |               |                                                                                                                  | C77655    | 4.7549  | 6.3197  | -1.5648 |
| 1435660_at   | LOC664787     | Sp110 nuclear body protein-like                                                                                  | BB548008  | 5.4594  | 7.0248  | -1.5654 |
| 1424835_at   | Gstm4         | glutathione S-transferase, mu 4                                                                                  | AF464943  | 5.1421  | 6.7079  | -1.5658 |
| 1422818_at   | Nedd9         | neural precursor cell expressed, developmentally down-regulated gene 9                                           | NM_017464 | 8.5539  | 10.1200 | -1.5661 |
| 1417565_at   | Abhd5         | abhydrolase domain containing 5                                                                                  | AK007421  | 7.6064  | 9.1729  | -1.5665 |
| 1418873_at   | Sfxn4         | sideroflexin 4                                                                                                   | NM_053198 | 5.6966  | 7.2656  | -1.5691 |
| 1433500_at   | Dennd2a       | DENN/MADD domain containing 2A                                                                                   | AV260555  | 7.7582  | 9.3276  | -1.5694 |
| 1445160_at   | Nav3          | neuron navigator 3                                                                                               | BB639193  | 4.9195  | 6.4898  | -1.5704 |
| 1439531_at   | E130311K13Rik | RIKEN cDNA E130311K13 gene                                                                                       | BB754259  | 6.4246  | 7.9951  | -1.5704 |
| 1416334_at   | Wwox          | WW domain-containing oxidoreductase                                                                              | NM_019573 | 5.4690  | 7.0394  | -1.5704 |
| 1441367_a_at |               |                                                                                                                  | BG076370  | 4.5699  | 6.1404  | -1.5705 |
| 1438426_at   | Shisa4        | shisa homolog 4 (Xenopus laevis)                                                                                 | BF468228  | 8.0879  | 9.6586  | -1.5707 |
| 1434015_at   | Slc2a6        | solute carrier family 2 (facilitated glucose transporter), member 6                                              | BB196807  | 5.0174  | 6.5881  | -1.5707 |
| 1417626_at   | Pde4dip       | phosphodiesterase 4D interacting protein (myomegalin)                                                            | NM_031401 | 4.4777  | 6.0489  | -1.5713 |
| 1436341_at   | Hmbox1        | homeobox containing 1                                                                                            | BM125569  | 5.3611  | 6.9332  | -1.5721 |
| 1454997_at   | Msrb3         | methionine sulfoxide reductase B3                                                                                | AV286522  | 5.8041  | 7.3768  | -1.5727 |
| 1440443_at   | E030016H06Rik | RIKEN cDNA E030016H06 gene                                                                                       | BB531351  | 4.9843  | 6.5578  | -1.5735 |
| 1441272_at   | Matr3         | matrin 3                                                                                                         | BI249188  | 6.6829  | 8.2568  | -1.5739 |
| 1433920_at   | Sema4c        | sema domain, immunoglobulin domain (Ig), transmembrane domain (TM) and short cytoplasmic domain, (semaphorin) 4C | BQ032843  | 7.7111  | 9.2851  | -1.5740 |
| 1456512_at   | Pdzrn4        | PDZ domain containing RING finger 4                                                                              | AV174487  | 4.2037  | 5.7781  | -1.5744 |
| 1418496_at   | Foxa1         | forkhead box A1                                                                                                  | NM_008259 | 3.7307  | 5.3054  | -1.5747 |
| 1452261_at   | Shprh         | SNF2 histone linker PHD RING helicase                                                                            | BC006883  | 7.1623  | 8.7377  | -1.5753 |
| 1457337_at   | Airn          | antisense Igf2r RNA                                                                                              | AV028487  | 4.6127  | 6.1887  | -1.5760 |
| 1422754_at   | Tmod1         | tropomodulin 1                                                                                                   | NM_021883 | 6.2582  | 7.8356  | -1.5775 |
| 1423475_at   | Cnm2          | cyclin M2                                                                                                        | BB278418  | 4.8712  | 6.4487  | -1.5775 |
| 1416051_at   | C2            | complement component 2 (within H-2S)                                                                             | NM_013484 | 5.3195  | 6.8973  | -1.5779 |
| 1450716_at   | Adamts1       | a disintegrin-like and metallopeptidase (reprolysin type) with thrombospondin type 1 motif, 1                    | D67076    | 9.1231  | 10.7011 | -1.5780 |
| 1454764_s_at | Slc38a1       | solute carrier family 38, member 1                                                                               | BF165681  | 7.4821  | 9.0648  | -1.5827 |
| 1451867_x_at | Arhgap6       | Rho GTPase activating protein 6                                                                                  | AF177664  | 6.2508  | 7.8342  | -1.5834 |
| 1425880_x_at | Zfp352        | zinc finger protein 352                                                                                          | AF290196  | 4.2966  | 5.8810  | -1.5843 |
| 1460344_at   | Pbxip1        | pre B cell leukemia transcription factor interacting protein 1                                                   | AV220340  | 6.8998  | 8.4847  | -1.5848 |
| 1445492_at   |               |                                                                                                                  | BE956567  | 4.4920  | 6.0777  | -1.5857 |
| 1428694_at   | Mir17hg       | MIR17 host gene 1 (non-protein coding)                                                                           | AK017164  | 7.8215  | 9.4077  | -1.5862 |
| 1437403_at   | Samd5         | sterile alpha motif domain containing 5                                                                          | BB308071  | 5.3588  | 6.9450  | -1.5862 |
| 1454084_a_at | Senp8         | SUMO/sentrin specific peptidase 8                                                                                | AK018606  | 5.9415  | 7.5278  | -1.5863 |
| 1435745_at   | 5031439G07Rik | RIKEN cDNA 5031439G07 gene                                                                                       | BI408317  | 8.3445  | 9.9310  | -1.5865 |
| 1421155_at   | B3galt6       | UDP-Gal:betaGal beta 1,3-galactosyltransferase, polypeptide 6                                                    | NM_080445 | 5.5812  | 7.1687  | -1.5875 |
| 1418908_at   | Pam           | peptidylglycine alpha-amidating monooxygenase                                                                    | NM_013626 | 8.1788  | 9.7669  | -1.5881 |
| 1438767_at   | Osm           | oncostatin M                                                                                                     | BB237825  | 5.6292  | 7.2173  | -1.5881 |
| 1449903_at   | Crtam         | cytotoxic and regulatory T cell molecule                                                                         | NM_019465 | 4.8188  | 6.4073  | -1.5885 |
| 1435119_at   | Gm19439       | predicted gene, 19439                                                                                            | BE956710  | 4.0222  | 5.6110  | -1.5888 |
| 1444394_at   | Acad9         | acyl-Coenzyme A dehydrogenase family, member 9                                                                   | BB187759  | 3.9612  | 5.5508  | -1.5896 |
| 1460500_at   | Gm3715        | predicted gene 3715                                                                                              | AK017182  | 3.9612  | 5.5508  | -1.5896 |
| 1450493_at   | Kiss1r        | KISS1 receptor                                                                                                   | BC016531  | 5.6470  | 7.2372  | -1.5902 |
| 1421746_a_at | Fbxo17        | F-box protein 17                                                                                                 | NM_015796 | 4.9673  | 6.5578  | -1.5905 |
| 1427150_at   | Mll3          | myeloid/lymphoid or mixed-lineage leukemia 3                                                                     | BC022622  | 6.2857  | 7.8778  | -1.5921 |

|              |               |                                                                                   |           |        |         |         |
|--------------|---------------|-----------------------------------------------------------------------------------|-----------|--------|---------|---------|
| 1438103_at   | Pcdhgc4       | protocadherin gamma subfamily C, 4                                                | BG069300  | 5.3282 | 6.9213  | -1.5932 |
| 1441070_at   | Gm15050       | predicted gene 15050                                                              | BB660130  | 5.5091 | 7.1037  | -1.5946 |
| 1433990_at   | Lhfp13        | lipoma HMGIC fusion partner-like 3                                                | BQ175687  | 4.2088 | 5.8041  | -1.5953 |
| 1418678_at   | Has2          | hyaluronan synthase 2                                                             | NM_008216 | 8.3178 | 9.9132  | -1.5954 |
| 1447831_s_at | Mtmr7         | myotubularin related protein 7                                                    | BB431693  | 3.4143 | 5.0107  | -1.5964 |
| 1417112_at   | Arl2bp        | ADP-ribosylation factor-like 2 binding protein                                    | NM_024191 | 9.9236 | 11.5206 | -1.5970 |
| 1434261_at   | Sipa1l2       | signal-induced proliferation-associated 1 like 2                                  | AV228782  | 6.7152 | 8.3138  | -1.5986 |
| 1423033_at   | Stt3a         | STT3, subunit of the oligosaccharyltransferase complex, homolog A (S. cerevisiae) | AA756810  | 6.8564 | 8.4559  | -1.5995 |
| 1426802_at   | 8-Sep         | septin 8                                                                          | BB756379  | 6.4457 | 8.0455  | -1.5998 |
| 1425605_a_at | Lmbr1         | limb region 1                                                                     | AF190665  | 4.5808 | 6.1807  | -1.5999 |
| 1426938_at   | Nova1         | neuro-oncological ventral antigen 1                                               | BB627486  | 4.3588 | 5.9590  | -1.6003 |
| 1447948_at   | A430107O13Rik | RIKEN cDNA A430107O13 gene                                                        | AI195854  | 5.2685 | 6.8688  | -1.6003 |
| 1451490_at   | Lyplal1       | lysophospholipase-like 1                                                          | BC027340  | 6.3800 | 7.9804  | -1.6004 |
| 1443007_at   |               |                                                                                   | AW545941  | 5.0401 | 6.6421  | -1.6020 |
| 1427997_at   | Ndufaf4       | NADH dehydrogenase (ubiquinone) 1 alpha subcomplex, assembly factor 4             | BG064890  | 9.0112 | 10.6140 | -1.6028 |
| 1456331_at   | 9130023H24Rik | RIKEN cDNA 9130023H24 gene                                                        | BB040432  | 4.6360 | 6.2392  | -1.6032 |
| 1424474_a_at | Camkk2        | calcium/calmodulin-dependent protein kinase kinase 2, beta                        | BI157430  | 7.8125 | 9.4169  | -1.6044 |
| 1429831_at   | Pik3ap1       | phosphoinositide-3-kinase adaptor protein 1                                       | BI684288  | 4.5550 | 6.1607  | -1.6057 |
| 1433553_at   | Garnl3        | GTPase activating RANGAP domain-like 3                                            | BB131106  | 4.4196 | 6.0270  | -1.6074 |
| 1449389_at   | Tal1          | T cell acute lymphocytic leukemia 1                                               | NM_011527 | 3.8342 | 5.4443  | -1.6101 |
| 1455401_at   | Camkk2        | calcium/calmodulin-dependent protein kinase kinase 2, beta                        | AW061083  | 6.6872 | 8.2986  | -1.6114 |
| 1419359_at   | Hexim1        | hexamethylene bis-acetamide inducible 1                                           | BI411874  | 6.5331 | 8.1457  | -1.6127 |
| 1449169_at   | Has2          | hyaluronan synthase 2                                                             | NM_008216 | 8.6414 | 10.2541 | -1.6127 |
| 1447878_s_at | Fgfr1         | fibroblast growth factor receptor-like 1                                          | BB109694  | 9.8773 | 11.4913 | -1.6139 |
| 1424974_at   | Zfp418        | zinc finger protein 418                                                           | BC024761  | 3.4282 | 5.0430  | -1.6148 |
| 1420729_at   | Tcstv1        | 2-cell-stage, variable group, member 1                                            | AF067059  | 3.9044 | 5.5196  | -1.6152 |
| 1453261_at   | 2610035D17Rik | RIKEN cDNA 2610035D17 gene                                                        | BB760848  | 5.6402 | 7.2562  | -1.6160 |
| 1451085_at   | C030006K11Rik | RIKEN cDNA C030006K11 gene                                                        | BC019462  | 5.0107 | 6.6275  | -1.6168 |
| 1457265_at   | Akap17b       | A kinase (PRKA) anchor protein 17B                                                | BG063043  | 6.0489 | 7.6668  | -1.6179 |
| 1431214_at   |               |                                                                                   | BG297038  | 5.5531 | 7.1711  | -1.6180 |
| 1437639_at   | Fam115a       | family with sequence similarity 115, member A                                     | BF228051  | 4.8719 | 6.4898  | -1.6180 |
| 1452411_at   | Lrrc1         | leucine rich repeat containing 1                                                  | BG966295  | 6.0268 | 7.6454  | -1.6186 |
| 1459916_at   | Gm19980       | predicted gene, 19980                                                             | AA185884  | 3.7572 | 5.3765  | -1.6194 |
| 1439044_at   | Zfp354c       | zinc finger protein 354C                                                          | BB024472  | 6.5058 | 8.1252  | -1.6194 |
| 1435637_at   | Itfg1         | integrin alpha FG-GAP repeat containing 1                                         | AW554709  | 7.6286 | 9.2484  | -1.6198 |
| 1456554_at   |               |                                                                                   | AV370403  | 4.1035 | 5.7245  | -1.6210 |
| 1426782_at   | Gpr125        | G protein-coupled receptor 125                                                    | BC019649  | 9.9923 | 11.6136 | -1.6213 |
| 1419466_at   | Nkd2          | naked cuticle 2 homolog (Drosophila)                                              | BC019952  | 5.2865 | 6.9094  | -1.6229 |
| 1420615_at   | Ash2l         | ash2 (absent, small, or homeotic)-like (Drosophila)                               | BM207355  | 5.8888 | 7.5121  | -1.6233 |
| 1431189_a_at | Fahd2a        | fumarylacetoacetate hydrolase domain containing 2A                                | BI872590  | 4.3588 | 5.9820  | -1.6233 |
| 1437831_at   | Zcchc4        | zinc finger, CCHC domain containing 4                                             | BB834670  | 5.1383 | 6.7621  | -1.6238 |
| 1459238_at   |               |                                                                                   | AV319481  | 4.4535 | 6.0777  | -1.6242 |
| 1447988_at   |               |                                                                                   | AW208869  | 4.6952 | 6.3197  | -1.6245 |
| 1417691_at   | Bin3          | bridging integrator 3                                                             | NM_021328 | 8.9040 | 10.5285 | -1.6245 |
| 1422072_a_at | Gstm6         | glutathione S-transferase, mu 6                                                   | NM_008184 | 4.6127 | 6.2392  | -1.6265 |
| 1423157_at   | Gnpnat1       | glucosamine-phosphate N-acetyltransferase 1                                       | AK008566  | 6.3895 | 8.0161  | -1.6266 |
| 1430247_at   | Daam2         | dishevelled associated activator of morphogenesis 2                               | AK009382  | 4.9880 | 6.6158  | -1.6278 |
| 1451878_a_at | Jmy           | junction-mediating and regulatory protein                                         | BC020052  | 5.2034 | 6.8313  | -1.6279 |
| 1450685_at   | Arpp19        | cAMP-regulated phosphoprotein 19                                                  | BE648432  | 7.6558 | 9.2852  | -1.6293 |
| 1437566_at   | Gnl2          | guanine nucleotide binding protein-like 2 (nucleolar)                             | BI666155  | 5.8326 | 7.4636  | -1.6310 |
| 1446380_at   | 9430076C15Rik | RIKEN cDNA 9430076C15 gene                                                        | BB101151  | 4.0372 | 5.6689  | -1.6317 |
| 1429729_at   | 1500004A13Rik | RIKEN cDNA 1500004A13 gene                                                        | BB462518  | 3.6732 | 5.3054  | -1.6322 |
| 1445173_at   | AK129341      | cDNA sequence AK129341                                                            | BF472675  | 3.6726 | 5.3054  | -1.6328 |
| 1460698_a_at | Sec11c        | SEC11 homolog C (S. cerevisiae)                                                   | AK007641  | 9.2423 | 10.8751 | -1.6329 |
| 1431786_s_at | 1190003J15Rik | RIKEN cDNA 1190003J15 gene                                                        | AK013117  | 5.4690 | 7.1037  | -1.6347 |
| 1434572_at   | Hdac9         | histone deacetylase 9                                                             | BB750646  | 3.5023 | 5.1375  | -1.6352 |
| 1426016_a_at | Tro           | trophinin                                                                         | AF288606  | 3.5934 | 5.2306  | -1.6373 |
| 1429013_at   | Mtap7d2       | MAP7 domain containing 2                                                          | AK021126  | 4.4113 | 6.0489  | -1.6376 |
| 1451132_at   | Pbxip1        | pre B cell leukemia transcription factor interacting protein 1                    | AV220340  | 7.3026 | 8.9406  | -1.6379 |

|              |               |                                                                                     |           |        |         |         |
|--------------|---------------|-------------------------------------------------------------------------------------|-----------|--------|---------|---------|
| 1436339_at   | 1810058I24Rik | RIKEN cDNA 1810058I24 gene                                                          | BE627374  | 9.9757 | 11.6143 | -1.6387 |
| 1442183_at   |               |                                                                                     | AW555202  | 4.7404 | 6.3795  | -1.6391 |
| 1431004_at   | Loxl2         | lysyl oxidase-like 2                                                                | AI415741  | 4.2237 | 5.8632  | -1.6394 |
| 1439129_at   | Dock5         | dedicator of cytokinesis 5                                                          | AW495734  | 4.5566 | 6.1962  | -1.6396 |
| 1437959_at   | Zfp324        | zinc finger protein 324                                                             | BB277175  | 5.0818 | 6.7215  | -1.6397 |
| 1453913_a_at | Tap2          | transporter 2, ATP-binding cassette, sub-family B (MDR/TAP)                         | BE691515  | 7.2537 | 8.8934  | -1.6398 |
| 1426266_s_at | Zbtb8os       | zinc finger and BTB domain containing 8 opposite strand                             | BB417508  | 8.7722 | 10.4124 | -1.6402 |
| 1451173_at   | Lrrc49        | leucine rich repeat containing 49                                                   | BC016574  | 4.5566 | 6.1973  | -1.6407 |
| 1433454_at   | Abtb2         | ankyrin repeat and BTB (POZ) domain containing 2                                    | BB621938  | 6.8057 | 8.4466  | -1.6408 |
| 1426936_at   |               |                                                                                     | BC002257  | 8.5497 | 10.1917 | -1.6420 |
| 1428888_at   | Tmem33        | transmembrane protein 33                                                            | AW495283  | 3.4124 | 5.0544  | -1.6421 |
| 1420196_s_at | Tbc1d14       | TBC1 domain family, member 14                                                       | C77429    | 9.4094 | 11.0518 | -1.6424 |
| 1417359_at   | Mfap2         | microfibrillar-associated protein 2                                                 | NM_008546 | 7.1594 | 8.8037  | -1.6443 |
| 1436302_at   | Slc10a7       | solute carrier family 10 (sodium/bile acid cotransporter family), member 7          | BB770006  | 6.9880 | 8.6327  | -1.6447 |
| 1427387_a_at | Itgb4         | integrin beta 4                                                                     | L04678    | 6.0593 | 7.7042  | -1.6449 |
| 1424263_at   | Aif1l         | allograft inflammatory factor 1-like                                                | BC024599  | 7.1586 | 8.8037  | -1.6451 |
| 1425896_a_at | Fbn1          | fibrillin 1                                                                         | AF007248  | 4.7782 | 6.4242  | -1.6459 |
| 1428917_at   | Stx17         | syntaxin 17                                                                         | AK018158  | 6.7079 | 8.3541  | -1.6461 |
| 1433485_x_at | Gpr56         | G protein-coupled receptor 56                                                       | BF159976  | 5.5812 | 7.2276  | -1.6464 |
| 1418565_at   | Serbp1        | serpine1 mRNA binding protein 1                                                     | BC006030  | 5.8307 | 7.4774  | -1.6467 |
| 1439831_at   |               |                                                                                     | AW111920  | 5.2861 | 6.9332  | -1.6471 |
| 1460628_at   | Eme2          | essential meiotic endonuclease 1 homolog 2 (S. pombe)                               | AV245208  | 4.7427 | 6.3902  | -1.6474 |
| 1435043_at   | Plcb1         | phospholipase C, beta 1                                                             | BB794831  | 7.2302 | 8.8779  | -1.6477 |
| 1451363_a_at | Dennd2d       | DENN/MADD domain containing 2D                                                      | BC008266  | 4.6349 | 6.2831  | -1.6482 |
| 1437291_at   | 2700081O15Rik | RIKEN cDNA 2700081O15 gene                                                          | AV131166  | 4.4497 | 6.0989  | -1.6492 |
| 1419324_at   | Lhx9          | LIM homeobox protein 9                                                              | NM_010714 | 3.5815 | 5.2306  | -1.6492 |
| 1424587_at   | Gemin8        | gem (nuclear organelle) associated protein 8                                        | BC023488  | 6.0824 | 7.7316  | -1.6492 |
| 1451325_at   | Fytd1         | forty-two-three domain containing 1                                                 | BC010204  | 6.4000 | 8.0510  | -1.6510 |
| 1449191_at   | Wfdc12        | WAP four-disulfide core domain 12                                                   | NM_138684 | 5.7245 | 7.3768  | -1.6523 |
| 1455190_at   | Gng7          | guanine nucleotide binding protein (G protein), gamma 7                             | BM114283  | 4.1050 | 5.7575  | -1.6525 |
| 1456830_at   | Ppp1r2        | protein phosphatase 1, regulatory (inhibitor) subunit 2                             | BB542221  | 6.0434 | 7.6960  | -1.6526 |
| 1438448_at   | Otop1         | otopetrin 1                                                                         | BB217568  | 3.4443 | 5.0970  | -1.6527 |
| 1431436_a_at | Katnal2       | katanin p60 subunit A-like 2                                                        | AK017114  | 5.0544 | 6.7079  | -1.6535 |
| 1417704_a_at | Arhgap6       | Rho GTPase activating protein 6                                                     | NM_009707 | 5.1894 | 6.8439  | -1.6546 |
| 1422216_at   | Mid2          | midline 2                                                                           | AF196480  | 5.3877 | 7.0434  | -1.6557 |
| 1419418_a_at | Morc1         | microrchidia 1                                                                      | NM_010816 | 5.7245 | 7.3855  | -1.6610 |
| 1449160_at   | Npr1          | natriuretic peptide receptor 1                                                      | J05504    | 4.4586 | 6.1198  | -1.6612 |
| 1421843_at   | Il1rap        | interleukin 1 receptor accessory protein                                            | BE285634  | 4.7667 | 6.4285  | -1.6618 |
| 1435615_at   | Zfp365        | zinc finger protein 365                                                             | BB277790  | 5.1853 | 6.8471  | -1.6618 |
| 1417848_at   | Zfp704        | zinc finger protein 704                                                             | AW413620  | 3.9012 | 5.5633  | -1.6620 |
| 1448409_at   | Lrmp          | lymphoid-restricted membrane protein                                                | NM_008511 | 4.8954 | 6.5578  | -1.6624 |
| 1435540_at   | Irgq          | immunity-related GTPase family, Q                                                   | BM116550  | 6.7448 | 8.4074  | -1.6627 |
| 1433436_s_at | Thtpa         | thiamine triphosphatase                                                             | BB350618  | 6.9506 | 8.6134  | -1.6628 |
| 1447953_at   | Egfl8         | EGF-like domain 8                                                                   | AW047140  | 6.2005 | 7.8634  | -1.6629 |
| 1442587_at   |               |                                                                                     | BB451946  | 3.7420 | 5.4057  | -1.6637 |
| 1424872_at   | Zfp932        | zinc finger protein 932                                                             | BC012405  | 6.9332 | 8.5970  | -1.6638 |
| 1425658_at   | Cd109         | CD109 antigen                                                                       | AY083458  | 7.7551 | 9.4202  | -1.6651 |
| 1452843_at   | Il6st         | interleukin 6 signal transducer                                                     | AK017211  | 8.7126 | 10.3782 | -1.6655 |
| 1449408_at   | Jam2          | junction adhesion molecule 2                                                        | NM_023844 | 5.5812 | 7.2467  | -1.6655 |
| 1437760_at   | Galnt12       | UDP-N-acetyl-alpha-D-galactosamine:polypeptide N-acetylgalactosaminyltransferase 12 | AV376137  | 9.3071 | 10.9729 | -1.6659 |
| 1432533_a_at | Slc35a2       | solute carrier family 35 (UDP-galactose transporter), member A2                     | AK008095  | 6.4688 | 8.1355  | -1.6667 |
| 1419477_at   | Clec2d        | C-type lectin domain family 2, member d                                             | NM_053109 | 6.0925 | 7.7607  | -1.6682 |
| 1431403_a_at | Mtap7d2       | MAP7 domain containing 2                                                            | AK019929  | 4.1422 | 5.8109  | -1.6687 |
| 1456596_at   | Fam70a        | family with sequence similarity 70, member A                                        | BB093996  | 4.4496 | 6.1198  | -1.6702 |
| 1434576_at   | Tsga14        | testis specific gene A14                                                            | BI648973  | 5.5571 | 7.2276  | -1.6705 |
| 1455058_at   | Mttr9         | myotubularin related protein 9                                                      | BM118290  | 6.2242 | 7.8961  | -1.6718 |
| 1452620_at   | Pck2          | phosphoenolpyruvate carboxykinase 2 (mitochondrial)                                 | BB024477  | 6.6790 | 8.3541  | -1.6751 |
| 1433742_at   | Kank1         | KN motif and ankyrin repeat domains 1                                               | BQ032773  | 6.5268 | 8.2023  | -1.6755 |

|              |               |                                                                                                      |           |         |         |         |
|--------------|---------------|------------------------------------------------------------------------------------------------------|-----------|---------|---------|---------|
| 1432332_a_at | Nudt19        | nudix (nucleoside diphosphate linked moiety X)-<br>type motif 19                                     | AK008430  | 6.8285  | 8.5047  | -1.6761 |
| 1427050_at   | Txndc16       | thioredoxin domain containing 16                                                                     | BC027108  | 7.9201  | 9.5972  | -1.6771 |
| 1452831_s_at | Ppat          | phosphatidyl pyrophosphatase<br>amidotransferase                                                     | AV305746  | 8.7500  | 10.4275 | -1.6775 |
| 1453060_at   | Rgs8          | regulator of G-protein signaling 8                                                                   | AK018337  | 4.5233  | 6.2019  | -1.6786 |
| 1417311_at   | Crip2         | cysteine rich protein 2                                                                              | NM_024223 | 7.4836  | 9.1638  | -1.6801 |
| 1433715_at   | Cpne7         | copine VII                                                                                           | BB426433  | 5.2079  | 6.8893  | -1.6814 |
| 1427073_at   | Lace1         | lactation elevated 1                                                                                 | AF397909  | 5.8462  | 7.5278  | -1.6816 |
| 1457566_at   | Zfp677        | zinc finger protein 677                                                                              | BB271764  | 5.6589  | 7.3417  | -1.6828 |
| 1427020_at   | Scara3        | scavenger receptor class A, member 3                                                                 | BC026446  | 7.0647  | 8.7478  | -1.6830 |
| 1422678_at   | Dgat2         | diacylglycerol O-acyltransferase 2                                                                   | AK002443  | 6.7532  | 8.4383  | -1.6851 |
| 1452878_at   | Prkce         | protein kinase C, epsilon                                                                            | AK017901  | 6.6089  | 8.2940  | -1.6851 |
| 1429258_at   | A030001D20Rik | RIKEN cDNA A030001D20 gene                                                                           | AK003910  | 5.9590  | 7.6454  | -1.6863 |
| 1440994_at   | Shprh         | SNF2 histone linker PHD RING helicase                                                                | BB003227  | 5.5410  | 7.2276  | -1.6866 |
| 1437363_at   | Homer1        | homer homolog 1 (Drosophila)                                                                         | BQ043238  | 7.6809  | 9.3688  | -1.6878 |
| 1451782_a_at | Slc29a1       | solute carrier family 29 (nucleoside<br>transporters), member 1                                      | AF305501  | 7.6900  | 9.3784  | -1.6884 |
| 1427630_x_at | Ceacam1       | carcinoembryonic antigen-related cell adhesion<br>molecule 1                                         | X67278    | 4.3588  | 6.0489  | -1.6902 |
| 1424455_at   | Gprasp1       | G protein-coupled receptor associated sorting<br>protein 1                                           | BC027187  | 6.8509  | 8.5425  | -1.6917 |
| 1448309_at   | Ap3m1         | adaptor-related protein complex 3, mu 1 subunit                                                      | AF242857  | 6.6564  | 8.3483  | -1.6919 |
| 1425731_at   | Ankrd24       | ankyrin repeat domain 24                                                                             | BC017633  | 7.0182  | 8.7136  | -1.6954 |
| 1440928_at   | D630037F22Rik | RIKEN cDNA D630037F22 gene                                                                           | AV252126  | 6.6421  | 8.3378  | -1.6958 |
| 1418090_at   | Plvap         | plasmalemma vesicle associated protein                                                               | NM_032398 | 5.5423  | 7.2385  | -1.6961 |
| 1416021_a_at |               |                                                                                                      | BC002008  | 11.1561 | 12.8528 | -1.6967 |
| 1429723_at   | 6330409N04Rik | RIKEN cDNA 6330409N04 gene                                                                           | AK018153  | 7.0090  | 8.7074  | -1.6984 |
| 1429716_at   | Zcchc4        | zinc finger, CCHC domain containing 4                                                                | BB821121  | 7.7740  | 9.4724  | -1.6984 |
| 1444060_at   | 2610027K06Rik | RIKEN cDNA 2610027K06 gene                                                                           | BB497990  | 4.2131  | 5.9119  | -1.6988 |
| 1419658_at   |               |                                                                                                      | NM_010398 | 3.9701  | 5.6689  | -1.6988 |
| 1435503_at   | C330006K01Rik | RIKEN cDNA C330006K01 gene                                                                           | AV263612  | 3.9412  | 5.6402  | -1.6991 |
| 1450729_at   | Hs2st1        | heparan sulfate 2-O-sulfotransferase 1                                                               | AV346600  | 9.1216  | 10.8209 | -1.6993 |
| 1419971_s_at | Slc35a5       | solute carrier family 35, member A5                                                                  | C86506    | 8.1009  | 9.8006  | -1.6997 |
| 1437077_at   | Dcun1d2       | DCN1, defective in cullin neddylation 1, domain<br>containing 2 ( <i>S. cerevisiae</i> )             | AV300673  | 6.8303  | 8.5301  | -1.6998 |
| 1437785_at   | Adamts9       | a disintegrin-like and metalloproteinase<br>(reprolysin type) with thrombospondin type 1<br>motif, 9 | AV364944  | 7.2094  | 8.9095  | -1.7001 |
| 1417673_at   | Grb14         | growth factor receptor bound protein 14                                                              | NM_016719 | 3.7104  | 5.4108  | -1.7005 |
| 1450206_at   | Dlc1          | deleted in liver cancer 1                                                                            | NM_015802 | 4.1375  | 5.8382  | -1.7007 |
| 1456045_at   | 1700106N22Rik | RIKEN cDNA 1700106N22 gene                                                                           | AV173571  | 4.1035  | 5.8041  | -1.7007 |
| 1439427_at   | Cldn9         | claudin 9                                                                                            | BB026487  | 4.8818  | 6.5829  | -1.7011 |
| 1434216_a_at | Nudt19        | nudix (nucleoside diphosphate linked moiety X)-<br>type motif 19                                     | BG070689  | 7.5325  | 9.2341  | -1.7016 |
| 1426245_s_at | Mapre2        | microtubule-associated protein, RP/EB family,<br>member 2                                            | BC027056  | 7.5278  | 9.2304  | -1.7026 |
| 1448780_at   | Slc12a2       | solute carrier family 12, member 2                                                                   | BG069505  | 7.3470  | 9.0513  | -1.7043 |
| 1418714_at   | Dusp8         | dual specificity phosphatase 8                                                                       | NM_008748 | 5.8041  | 7.5086  | -1.7045 |
| 1433608_at   | Scfd2         | Sec1 family domain containing 2                                                                      | BB821363  | 5.5963  | 7.3026  | -1.7063 |
| 1453474_at   | Abhd15        | abhydrolase domain containing 15                                                                     | AI467583  | 3.8112  | 5.5196  | -1.7084 |
| 1439662_at   | Homer1        | homer homolog 1 (Drosophila)                                                                         | BM124609  | 6.5730  | 8.2826  | -1.7096 |
| 1437861_s_at | Prkce         | protein kinase C, epsilon                                                                            | BB335101  | 5.1565  | 6.8688  | -1.7123 |
| 1457088_at   | Bloc1s6       | biogenesis of organelles complex-1, subunit 6,<br>pallidin                                           | BB780781  | 3.9279  | 5.6402  | -1.7124 |
| 1429639_at   | Gpcpd1        | glycerophosphocholine phosphodiesterase<br>GDE1 homolog ( <i>S. cerevisiae</i> )                     | AK009137  | 4.8140  | 6.5268  | -1.7128 |
| 1417793_at   | Irgm2         | immunity-related GTPase family M member 2                                                            | NM_019440 | 7.4935  | 9.2067  | -1.7132 |
| 1434618_at   | Crebzf        | CREB/ATF bZIP transcription factor                                                                   | AA123443  | 5.9590  | 7.6739  | -1.7149 |
| 1417538_at   | Slc35a1       | solute carrier family 35 (CMP-sialic acid<br>transporter), member 1                                  | NM_011895 | 8.4388  | 10.1538 | -1.7150 |
| 1428935_at   | Canx          | calnexin                                                                                             | AI988026  | 7.0981  | 8.8177  | -1.7195 |
| 1451040_at   | Dtd1          | D-tyrosyl-tRNA deacylase 1 homolog ( <i>S.</i><br><i>cerevisiae</i> )                                | AI451865  | 8.0329  | 9.7530  | -1.7201 |
| 1456333_a_at | Arhgap6       | Rho GTPase activating protein 6                                                                      | BB367529  | 5.6291  | 7.3506  | -1.7214 |
| 1450813_a_at | Tnni1         | troponin I, skeletal, slow 1                                                                         | NM_021467 | 5.2106  | 6.9332  | -1.7226 |
| 1425969_a_at | Htt           | huntingtin                                                                                           | L23312    | 8.0083  | 9.7321  | -1.7238 |
| 1438303_at   | Tgfb2         | transforming growth factor, beta 2                                                                   | AV246759  | 4.2805  | 6.0047  | -1.7242 |
| 1419853_a_at | P2rx7         | purinergic receptor P2X, ligand-gated ion<br>channel, 7                                              | AI552982  | 6.9887  | 8.7142  | -1.7255 |

|              |               |                                                                                              |           |        |         |         |
|--------------|---------------|----------------------------------------------------------------------------------------------|-----------|--------|---------|---------|
| 1437898_at   |               |                                                                                              | BB668056  | 4.7151 | 6.4409  | -1.7257 |
| 1439516_at   | 2610201A13Rik | RIKEN cDNA 2610201A13 gene                                                                   | AW488471  | 6.3034 | 8.0293  | -1.7259 |
| 1417965_at   | Plekha1       | pleckstrin homology domain containing, family A (phosphoinositide binding specific) member 1 | NM_133942 | 8.9244 | 10.6508 | -1.7263 |
| 1433902_at   | Kbtbd8        | kelch repeat and BTB (POZ) domain containing 8                                               | BB469300  | 3.9701 | 5.6970  | -1.7269 |
| 1459664_at   | Wdr31         | WD repeat domain 31                                                                          | BB741856  | 4.8303 | 6.5578  | -1.7275 |
| 1448996_at   | Rom1          | rod outer segment membrane protein 1                                                         | NM_009073 | 5.3325 | 7.0611  | -1.7287 |
| 1425169_at   | Prss42        | protease, serine, 42                                                                         | AB052292  | 5.0895 | 6.8186  | -1.7290 |
| 1423878_at   | Gypc          | glycophorin C                                                                                | BC027408  | 5.6970 | 7.4308  | -1.7338 |
| 1457781_at   | Kcnq1ot1      | KCNQ1 overlapping transcript 1                                                               | BG063584  | 5.4443 | 7.1787  | -1.7343 |
| 1419042_at   | Iigp1         | interferon inducible GTPase 1                                                                | BM239828  | 6.1370 | 7.8716  | -1.7346 |
| 1460371_at   | Hspa12b       | heat shock protein 12B                                                                       | BC011103  | 4.8229 | 6.5578  | -1.7349 |
| 1424719_a_at | Mapt          | microtubule-associated protein tau                                                           | M18775    | 4.9195 | 6.6564  | -1.7370 |
| 1423679_at   | Tmem246       | transmembrane protein 246                                                                    | BC013800  | 3.7934 | 5.5311  | -1.7377 |
| 1449363_at   | Atf3          | activating transcription factor 3                                                            | BC019946  | 6.9019 | 8.6422  | -1.7403 |
| 1449012_s_at | Fndc4         | fibronectin type III domain containing 4                                                     | BC027164  | 6.4809 | 8.2218  | -1.7408 |
| 1426587_a_at | Stat3         | signal transducer and activator of transcription 3                                           | AI325183  | 8.2569 | 9.9979  | -1.7411 |
| 1437375_at   | Rfx3          | regulatory factor X, 3 (influences HLA class II expression)                                  | BB745175  | 6.1890 | 7.9339  | -1.7449 |
| 1458949_at   | 5330434G04Rik | RIKEN cDNA 5330434G04 gene                                                                   | BB750951  | 3.3086 | 5.0544  | -1.7459 |
| 1435469_at   | Qsox2         | quiescin Q6 sulfhydryl oxidase 2                                                             | BM237031  | 7.1698 | 8.9158  | -1.7461 |
| 1422965_at   | Agtrap        | angiotensin II, type I receptor-associated protein                                           | NM_009642 | 7.6073 | 9.3551  | -1.7478 |
| 1447410_at   |               |                                                                                              | BB712583  | 5.6970 | 7.4448  | -1.7478 |
| 1423457_at   | Slc35a5       | solute carrier family 35, member A5                                                          | BB778934  | 5.9830 | 7.7316  | -1.7486 |
| 1455494_at   | Col1a1        | collagen, type I, alpha 1                                                                    | BI794771  | 4.4891 | 6.2392  | -1.7501 |
| 1427912_at   | Cbr3          | carbonyl reductase 3                                                                         | AK003232  | 6.1451 | 7.8961  | -1.7510 |
| 1456853_at   | Gm4924        | predicted gene 4924                                                                          | BM235636  | 4.5680 | 6.3197  | -1.7517 |
| 1417932_at   | Il18          | interleukin 18                                                                               | NM_008360 | 6.4917 | 8.2458  | -1.7541 |
| 1457774_at   | Ntocr         | nucleoside-triphosphatase, cancer-related                                                    | BB528542  | 4.8714 | 6.6258  | -1.7544 |
| 1454756_at   | Lrch3         | leucine-rich repeats and calponin homology (CH) domain containing 3                          | BB763476  | 8.2417 | 9.9965  | -1.7549 |
| 1438682_at   | Pik3r1        | phosphatidylinositol 3-kinase, regulatory subunit, polypeptide 1 (p85 alpha)                 | BB426164  | 7.8204 | 9.5753  | -1.7549 |
| 1445503_at   | Gm715         | predicted pseudogene 715                                                                     | BQ175936  | 3.5127 | 5.2685  | -1.7558 |
| 1421883_at   | Elavl2        | ELAV (embryonic lethal, abnormal vision, Drosophila)-like 2 (Hu antigen B)                   | BB105998  | 3.8976 | 5.6545  | -1.7570 |
| 1436627_at   | Airn          | antisense Igf2r RNA                                                                          | BB368203  | 6.2582 | 8.0152  | -1.7570 |
| 1435916_at   | Zfp84         | zinc finger protein 84                                                                       | BG067388  | 3.9043 | 5.6639  | -1.7597 |
| 1449585_at   | Il1rap        | interleukin 1 receptor accessory protein                                                     | NM_134103 | 6.8186 | 8.5807  | -1.7621 |
| 1457726_at   | Rps15a        | ribosomal protein S15A                                                                       | BB231137  | 4.9721 | 6.7353  | -1.7632 |
| 1416607_at   | 4931406C07Rik | RIKEN cDNA 4931406C07 gene                                                                   | AI461712  | 8.1272 | 9.8906  | -1.7634 |
| 1426541_a_at | Endod1        | endonuclease domain containing 1                                                             | BF168366  | 4.4746 | 6.2392  | -1.7646 |
| 1418136_at   | Tgfb1i1       | transforming growth factor beta 1 induced transcript 1                                       | NM_009365 | 5.7631 | 7.5278  | -1.7647 |
| 1452170_at   | Chpf2         | chondroitin polymerizing factor 2                                                            | BC019714  | 6.9094 | 8.6743  | -1.7649 |
| 1426601_at   | Slc37a1       | solute carrier family 37 (glycerol-3-phosphate transporter), member 1                        | AV376428  | 6.0693 | 7.8342  | -1.7649 |
| 1444648_at   | Fam178b       | family with sequence similarity 178, member B                                                | AI507589  | 4.8229 | 6.5881  | -1.7652 |
| 1448609_at   | Tst           | thiosulfate sulfurtransferase, mitochondrial                                                 | BC005644  | 6.3586 | 8.1252  | -1.7666 |
| 1429456_a_at | Polr3e        | polymerase (RNA) III (DNA directed) polypeptide E                                            | AV251549  | 7.5032 | 9.2706  | -1.7674 |
| 1442167_at   | Cyfp2         | cytoplasmic FMR1 interacting protein 2                                                       | BG068238  | 3.8419 | 5.6110  | -1.7691 |
| 1422558_at   | Gamt          | guanidinoacetate methyltransferase                                                           | AF015887  | 7.4224 | 9.1923  | -1.7698 |
| 1430379_at   |               |                                                                                              | BM220939  | 3.6732 | 5.4443  | -1.7712 |
| 1429269_at   | BC068157      | cDNA sequence BC068157                                                                       | BE992549  | 5.3765 | 7.1485  | -1.7719 |
| 1449583_at   | Pcdhb20       | protocadherin beta 20                                                                        | NM_053145 | 4.2096 | 5.9820  | -1.7724 |
| 1455398_at   | Lrrc8c        | leucine rich repeat containing 8 family, member C                                            | BB333759  | 8.4383 | 10.2113 | -1.7731 |
| 1446160_x_at | Tmem69        | transmembrane protein 69                                                                     | BB234363  | 4.3652 | 6.1404  | -1.7752 |
| 1419521_at   | Zfp94         | zinc finger protein 94                                                                       | BC005437  | 4.1831 | 5.9590  | -1.7759 |
| 1448660_at   | Arhgdig       | Rho GDP dissociation inhibitor (GDI) gamma                                                   | NM_008113 | 5.3414 | 7.1176  | -1.7762 |
| 1430292_a_at | 1810030N24Rik | RIKEN cDNA 1810030N24 gene                                                                   | BG792484  | 7.5511 | 9.3276  | -1.7766 |
| 1452992_at   | Cdc26         | cell division cycle 26                                                                       | AK008199  | 6.1193 | 7.8961  | -1.7768 |
| 1428176_at   | S1pr2         | sphingosine-1-phosphate receptor 2                                                           | AK003144  | 8.3541 | 10.1326 | -1.7785 |
| 1435468_at   | B3gnt9-ps     | UDP-GlcNAc:betaGal beta-1,3-N-acetylglucosaminyltransferase 9, pseudogene                    | BB547181  | 4.2966 | 6.0759  | -1.7793 |
| 1460686_at   | Cntd1         | cyclin N-terminal domain containing 1                                                        | BC006866  | 5.2593 | 7.0394  | -1.7800 |
| 1428914_at   | Sh3pxd2a      | SH3 and PX domains 2A                                                                        | AK009333  | 7.7871 | 9.5674  | -1.7804 |



|              |               |                                                                                        |           |        |         |         |
|--------------|---------------|----------------------------------------------------------------------------------------|-----------|--------|---------|---------|
| 1421118_a_at | Gpr56         | G protein-coupled receptor 56                                                          | NM_018882 | 4.8064 | 6.5881  | -1.7817 |
| 1438266_at   |               |                                                                                        | BB764453  | 5.0970 | 6.8790  | -1.7821 |
| 1433891_at   | Lgr4          | leucine-rich repeat-containing G protein-coupled receptor 4                            | BI107632  | 8.3532 | 10.1355 | -1.7823 |
| 1446761_at   | D8Erd56e      | DNA segment, Chr 8, ERATO Doi 56, expressed                                            | C77659    | 3.7420 | 5.5261  | -1.7841 |
| 1425220_x_at | AF067061      | cDNA sequence AF067061                                                                 | AF067062  | 6.3016 | 8.0863  | -1.7847 |
| 1424209_at   | Rars2         | arginyl-tRNA synthetase 2, mitochondrial                                               | BC024878  | 8.2362 | 10.0222 | -1.7860 |
| 1438452_at   | Nebi          | nebulette                                                                              | BM121794  | 4.7712 | 6.5578  | -1.7866 |
| 1453148_at   | Sema3d        | sema domain, immunoglobulin domain (Ig), short basic domain, secreted, (semaphorin) 3D | BB499147  | 3.5127 | 5.2996  | -1.7869 |
| 1438931_s_at | Sesn1         | sestrin 1                                                                              | AV016566  | 6.8212 | 8.6081  | -1.7869 |
| 1445175_at   | Gm4117        | predicted gene 4117                                                                    | BB536129  | 5.0544 | 6.8439  | -1.7895 |
| 1420485_at   | Nol7          | nucleolar protein 7                                                                    | AW060738  | 5.4974 | 7.2873  | -1.7900 |
| 1452604_at   | Stard13       | StAR-related lipid transfer (START) domain containing 13                               | BB667840  | 6.8057 | 8.5970  | -1.7912 |
| 1452821_at   | Tia1          | Tia1 cytotoxic granule-associated RNA binding protein-like 1                           | AK020218  | 6.4444 | 8.2362  | -1.7918 |
| 1429678_at   | 5730508B09Rik | RIKEN cDNA 5730508B09 gene                                                             | AK017758  | 7.0682 | 8.8615  | -1.7933 |
| 1428592_s_at | Usp38         | ubiquitin specific peptidase 38                                                        | BG064874  | 6.3376 | 8.1321  | -1.7944 |
| 1457059_at   | Zfp438        | zinc finger protein 438                                                                | BB333562  | 4.6127 | 6.4073  | -1.7945 |
| 1417502_at   | Tspan7        | tetraspanin 7                                                                          | AF052492  | 5.2430 | 7.0377  | -1.7947 |
| 1437873_at   | Zfp799        | zinc finger protein 799                                                                | BB044772  | 5.5375 | 7.3328  | -1.7953 |
| 1456493_at   | Sp110         | Sp110 nuclear body protein                                                             | BG072319  | 4.6882 | 6.4836  | -1.7954 |
| 1416199_at   | Kifc3         | kinesin family member C3                                                               | NM_010631 | 7.6668 | 9.4626  | -1.7958 |
| 1437087_at   | 2210408K08Rik | RIKEN cDNA 2210408K08 gene                                                             | AV079268  | 9.6534 | 11.4494 | -1.7960 |
| 1457267_at   | A130010J15Rik | RIKEN cDNA A130010J15 gene                                                             | BB667685  | 5.6402 | 7.4364  | -1.7961 |
| 1448489_at   | Pafah2        | platelet-activating factor acetylhydrolase 2                                           | NM_133880 | 6.2200 | 8.0161  | -1.7961 |
| 1427325_s_at | Akna          | AT-hook transcription factor                                                           | BB014626  | 5.8632 | 7.6597  | -1.7965 |
| 1424362_at   | Ppapdc3       | phosphatidic acid phosphatase type 2 domain containing 3                               | BC016136  | 4.0372 | 5.8349  | -1.7977 |
| 1431681_at   | Klk9          | kallikrein related-peptidase 9                                                         | AK004807  | 5.5037 | 7.3026  | -1.7990 |
| 1450417_a_at | Rps20         | ribosomal protein S20                                                                  | BG070206  | 5.3047 | 7.1037  | -1.7990 |
| 1445414_at   |               |                                                                                        | BB713790  | 4.6674 | 6.4670  | -1.7995 |
| 1453246_at   | Rab39b        | RAB39B, member RAS oncogene family                                                     | AK020665  | 5.1082 | 6.9094  | -1.8012 |
| 1424105_a_at | Pttg1         | pituitary tumor-transforming gene 1                                                    | AF069051  | 9.1593 | 10.9609 | -1.8016 |
| 1415894_at   | Enpp2         | ectonucleotide pyrophosphatase/phosphodiesterase 2                                     | BC003264  | 5.5008 | 7.3026  | -1.8019 |
| 1419601_at   | Kcnj10        | potassium inwardly-rectifying channel, subfamily J, member 10                          | AF322631  | 5.0544 | 6.8564  | -1.8020 |
| 1434379_at   | Mxd4          | Max dimerization protein 4                                                             | BG868949  | 6.1108 | 7.9142  | -1.8034 |
| 1429625_at   | 2900054C01Rik | RIKEN cDNA 2900054C01 gene                                                             | BM202541  | 6.2392 | 8.0437  | -1.8045 |
| 1442916_at   |               |                                                                                        | BB202300  | 3.8342 | 5.6402  | -1.8060 |
| 1458934_at   | D5Erd505e     | DNA segment, Chr 5, ERATO Doi 505, expressed                                           | BG068094  | 4.1053 | 5.9119  | -1.8066 |
| 1425810_a_at | Csrp1         | cysteine and glycine-rich protein 1                                                    | BF124540  | 8.2905 | 10.0988 | -1.8083 |
| 1427320_at   | Copg2as2      | coatamer protein complex, subunit gamma 2, antisense 2                                 | BB316578  | 3.5681 | 5.3765  | -1.8084 |
| 1420411_a_at | Pi4k2b        | phosphatidylinositol 4-kinase type 2 beta                                              | NM_028744 | 8.4159 | 10.2251 | -1.8091 |
| 1443814_x_at | Ctsh          | cathepsin H                                                                            | BB542535  | 5.0442 | 6.8564  | -1.8122 |
| 1423672_at   | Ttc30b        | tetratricopeptide repeat domain 30B                                                    | BC026507  | 4.9204 | 6.7353  | -1.8148 |
| 1449099_at   | Lrba          | LPS-responsive beige-like anchor                                                       | NM_030695 | 6.5166 | 8.3319  | -1.8152 |
| 1440454_at   | Pion          | pigeon homolog (Drosophila)                                                            | AV377136  | 4.2333 | 6.0489  | -1.8156 |
| 1431400_a_at | Gas7          | growth arrest specific 7                                                               | AK017394  | 5.8367 | 7.6525  | -1.8158 |
| 1452148_at   | Lrpap1        | low density lipoprotein receptor-related protein associated protein 1                  | D00622    | 5.8649 | 7.6809  | -1.8161 |
| 1442811_at   | Rgmb          | RGM domain family, member B                                                            | BG073728  | 6.5111 | 8.3289  | -1.8178 |
| 1448830_at   | Dusp1         | dual specificity phosphatase 1                                                         | NM_013642 | 9.3928 | 11.2114 | -1.8185 |
| 1453578_at   | Pter          | phosphotriesterase related                                                             | BM939099  | 5.8115 | 7.6301  | -1.8186 |
| 1455030_at   | Ptprj         | protein tyrosine phosphatase, receptor type, J                                         | A116234   | 6.5818 | 8.4032  | -1.8214 |
| 1447057_at   |               |                                                                                        | BB343027  | 5.0452 | 6.8673  | -1.8221 |
| 1454858_x_at | Mettl7a1      | methyltransferase like 7A1                                                             | AV171622  | 5.8959 | 7.7180  | -1.8221 |
| 1427817_at   | LOC641050     | uncharacterized protein LOC641050                                                      | M11024    | 3.7880 | 5.6110  | -1.8230 |
| 1435252_at   | B3galt6       | UDP-Gal:betaGal beta 1,3-galactosyltransferase, polypeptide 6                          | AV328064  | 3.5815 | 5.4047  | -1.8233 |
| 1451503_at   | Nol3          | nucleolar protein 3 (apoptosis repressor with CARD domain)                             | BC027290  | 6.1738 | 7.9993  | -1.8255 |
| 1456439_x_at | Mical1        | microtubule associated monooxygenase, calponin and LIM domain containing 1             | BB209438  | 5.9119 | 7.7384  | -1.8265 |
| 1421854_at   | Fgl2          | fibrinogen-like protein 2                                                              | BF136544  | 3.4994 | 5.3262  | -1.8269 |

|                 |               |                                                                                         |                |         |         |         |
|-----------------|---------------|-----------------------------------------------------------------------------------------|----------------|---------|---------|---------|
| 1422748_at      | Zeb2          | zinc finger E-box binding homeobox 2                                                    | NM_015753      | 8.9519  | 10.7843 | -1.8324 |
| 1440825_s_at    | Ccdc28a       | coiled-coil domain containing 28A                                                       | AV100366       | 6.7255  | 8.5579  | -1.8324 |
| 1415772_at      | Ncl           | nucleolin                                                                               | BF118393       | 7.2973  | 9.1298  | -1.8325 |
| 1453997_a_at    | Nes           | nestin                                                                                  | AK012622       | 5.4777  | 7.3117  | -1.8340 |
| 1437534_at      |               |                                                                                         | AU019880       | 4.0221  | 5.8579  | -1.8358 |
| 1427029_at      | Htra3         | HtrA serine peptidase 3                                                                 | AK008764       | 4.8580  | 6.6941  | -1.8361 |
| 1443799_at      |               |                                                                                         | AV348753       | 4.6127  | 6.4495  | -1.8367 |
| 1434326_x_at    | Coro2b        | coronin, actin binding protein, 2B                                                      | BB317923       | 6.6564  | 8.4940  | -1.8376 |
| 1453158_at      | Zfp622        | zinc finger protein 622                                                                 | AK004048       | 3.1708  | 5.0107  | -1.8399 |
| 1426572_at      | Me2           | malic enzyme 2, NAD(+)-dependent, mitochondrial                                         | BM235734       | 8.4032  | 10.2450 | -1.8418 |
| 1459740_s_at    | Ucp2          | uncoupling protein 2 (mitochondrial, proton carrier)                                    | AW108044       | 6.1615  | 8.0044  | -1.8429 |
| 1434996_at      | Slc25a16      | solute carrier family 25 (mitochondrial carrier, Graves disease autoantigen), member 16 | AV316233       | 6.5424  | 8.3860  | -1.8437 |
| 1419089_at      | Timp3         | tissue inhibitor of metalloproteinase 3                                                 | BI111620       | 8.8555  | 10.7042 | -1.8487 |
| 1455967_at      | Sorbs1        | sorbin and SH3 domain containing 1                                                      | BB372866       | 5.1680  | 7.0173  | -1.8493 |
| 1440595_at      | Epb4.113      | erythrocyte protein band 4.1-like 3                                                     | BB036542       | 4.5394  | 6.3902  | -1.8507 |
| 1433868_at      | Btbd3         | BTB (POZ) domain containing 3                                                           | AV028445       | 8.7622  | 10.6181 | -1.8559 |
| 1418578_at      | Dgka          | diacylglycerol kinase, alpha                                                            | BC006713       | 7.3427  | 9.1994  | -1.8566 |
| 1454078_a_at    | Gal3st1       | galactose-3-O-sulfotransferase 1                                                        | AK002510       | 4.9870  | 6.8440  | -1.8570 |
| 1419056_at      | Rtn2          | reticulon 2 (Z-band associated protein)                                                 | AF038538       | 4.4791  | 6.3376  | -1.8585 |
| 1449862_a_at    | Pi4k2b        | phosphatidylinositol 4-kinase type 2 beta                                               | NM_028744      | 7.4838  | 9.3440  | -1.8603 |
| 1447926_at      | Arl5a         | ADP-ribosylation factor-like 5A                                                         | BB811124       | 7.1392  | 9.0015  | -1.8623 |
| 1435842_at      | Nat8l         | N-acetyltransferase 8-like                                                              | AI644670       | 6.0698  | 7.9339  | -1.8641 |
| 1436531_at      | Metap2        | methionine aminopeptidase 2                                                             | BB447764       | 7.5356  | 9.4008  | -1.8652 |
| 1448652_at      | Ift88         | intraflagellar transport 88                                                             | NM_009376      | 5.5287  | 7.3941  | -1.8654 |
| 1418162_at      | Tlr4          | toll-like receptor 4                                                                    | AF185285       | 5.8311  | 7.6973  | -1.8662 |
| 1450193_at      | Hcn1          | hyperpolarization-activated, cyclic nucleotide-gated K+ 1                               | NM_010408      | 5.2017  | 7.0689  | -1.8671 |
| 1456197_x_at    | Ajap1         | adherens junction associated protein 1                                                  | BB342782       | 5.7747  | 7.6454  | -1.8706 |
| 1449335_at      | Timp3         | tissue inhibitor of metalloproteinase 3                                                 | BI111620       | 8.9227  | 10.7946 | -1.8719 |
| 1443471_at      | Zbtb20        | zinc finger and BTB domain containing 20                                                | BB087247       | 4.1738  | 6.0480  | -1.8742 |
| 1424613_at      | Gprc5b        | G protein-coupled receptor, family C, group 5, member B                                 | BC020004       | 7.3506  | 9.2269  | -1.8763 |
| 1454808_at      | Efha1         | EF hand domain family A1                                                                | BQ176617       | 8.4601  | 10.3371 | -1.8770 |
| 1425779_a_at    | Tbx1          | T-box 1                                                                                 | AF326960       | 4.2633  | 6.1404  | -1.8771 |
| 1419292_at      | Htra3         | HtrA serine peptidase 3                                                                 | NM_030127      | 6.6729  | 8.5503  | -1.8774 |
| 1438236_at      | Nfia          | nuclear factor I/A                                                                      | BB485864       | 4.2807  | 6.1607  | -1.8800 |
| 1459878_a_at    | A430107O13Rik | RIKEN cDNA A430107O13 gene                                                              | AI195854       | 5.0544  | 6.9355  | -1.8811 |
| 1428375_at      | 4932415G12Rik | RIKEN cDNA 4932415G12 gene                                                              | AK015136       | 4.0372  | 5.9183  | -1.8811 |
| 1430291_at      | Dock5         | dedicator of cytokinesis 5                                                              | AK004325       | 7.0143  | 8.8954  | -1.8811 |
| 1435417_at      | AI464131      | expressed sequence AI464131                                                             | BG063189       | 4.5707  | 6.4545  | -1.8838 |
| 1420859_at      | Pkia          | protein kinase inhibitor, alpha                                                         | AK010212       | 3.8127  | 5.6970  | -1.8843 |
| 1434335_at      | Dip2b         | DIP2 disco-interacting protein 2 homolog B (Drosophila)                                 | BB795504       | 9.0395  | 10.9274 | -1.8879 |
| 1431226_a_at    | Fndc4         | fibronectin type III domain containing 4                                                | AK013203       | 7.2098  | 9.0986  | -1.8888 |
| 1425264_s_at    | Mbp           | myelin basic protein                                                                    | BB181247       | 5.3765  | 7.2656  | -1.8891 |
| 1416981_at      | Foxo1         | forkhead box O1                                                                         | AI462296       | 6.0777  | 7.9689  | -1.8912 |
| 1434186_at      | Lpar4         | lysophosphatidic acid receptor 4                                                        | BB297502       | 6.6216  | 8.5139  | -1.8923 |
| FX-MURINE_b1_at |               |                                                                                         | AFFX-MURINE_b1 | 11.2291 | 13.1218 | -1.8927 |
| 1427302_at      | Enpp3         | ectonucleotide pyrophosphatase/phosphodiesterase 3                                      | AV224446       | 4.6127  | 6.5058  | -1.8931 |
| 1456060_at      | Maf           | avian musculoaponeurotic fibrosarcoma (v-maf) AS42 oncogene homolog                     | AV284857       | 7.3328  | 9.2269  | -1.8941 |
| 1421882_a_at    | Elavl2        | ELAV (embryonic lethal, abnormal vision, Drosophila)-like 2 (Hu antigen B)              | BB105998       | 4.0645  | 5.9590  | -1.8945 |
| 1436272_at      | Rab3gap2      | RAB3 GTPase activating protein subunit 2                                                | BQ175872       | 5.3880  | 7.2842  | -1.8963 |
| 1424831_at      | Cpne2         | copine II                                                                               | BC023348       | 7.1140  | 9.0109  | -1.8968 |
| 1424653_at      | Tspan15       | tetraspanin 15                                                                          | BC003872       | 7.7194  | 9.6163  | -1.8969 |
| 1454901_at      | Ypel2         | yippee-like 2 (Drosophila)                                                              | BG069663       | 6.7797  | 8.6779  | -1.8981 |
| 1438349_at      | Zfp229        | zinc finger protein 229                                                                 | BG069331       | 5.2500  | 7.1485  | -1.8985 |
| 1419602_at      | Hoxa2         | homeobox A2                                                                             | NM_010451      | 3.7829  | 5.6817  | -1.8987 |
| 1460531_at      |               |                                                                                         | AK013759       | 5.6925  | 7.5915  | -1.8990 |
| 1428284_at      | 8430427H17Rik | RIKEN cDNA 8430427H17 gene                                                              | AK018446       | 6.4952  | 8.3950  | -1.8998 |
| 1449049_at      | Tlr1          | toll-like receptor 1                                                                    | AF316985       | 3.1969  | 5.0970  | -1.9001 |
| 1455020_at      | Snx25         | sorting nexin 25                                                                        | AV351081       | 8.1740  | 10.0744 | -1.9004 |
| 1446990_at      | Nfia          | nuclear factor I/A                                                                      | AW556192       | 5.0321  | 6.9332  | -1.9011 |

|              |               |                                                                                          |           |        |         |         |
|--------------|---------------|------------------------------------------------------------------------------------------|-----------|--------|---------|---------|
| 1430105_at   | 1700042O10Rik | RIKEN cDNA 1700042O10 gene                                                               | AK006690  | 3.1525 | 5.0544  | -1.9019 |
| 1449013_at   | Eef2k         | eukaryotic elongation factor-2 kinase                                                    | BC003433  | 6.5268 | 8.4299  | -1.9031 |
| 1424034_at   | Rora          | RAR-related orphan receptor alpha                                                        | BI660199  | 4.2537 | 6.1607  | -1.9070 |
| 1425811_a_at | Csrp1         | cysteine and glycine-rich protein 1                                                      | BF124540  | 8.7847 | 10.6919 | -1.9072 |
| 1436933_at   |               |                                                                                          | BM211430  | 4.6502 | 6.5590  | -1.9088 |
| 1425515_at   | Pik3r1        | phosphatidylinositol 3-kinase, regulatory subunit, polypeptide 1 (p85 alpha)             | M60651    | 5.3054 | 7.2147  | -1.9093 |
| 1428429_at   | Rgmb          | RGM domain family, member B                                                              | AK004310  | 8.0704 | 9.9800  | -1.9095 |
| 1445434_at   | Snupn         | snurportin 1                                                                             | BQ176044  | 4.2704 | 6.1807  | -1.9103 |
| 1427929_a_at | Pdxk          | pyridoxal (pyridoxine, vitamin B6) kinase                                                | BG063905  | 8.6069 | 10.5207 | -1.9138 |
| 1436570_at   | Pag1          | phosphoprotein associated with glycosphingolipid microdomains 1                          | BG143461  | 6.2501 | 8.1649  | -1.9148 |
| 1447862_x_at | Thbs2         | thrombospondin 2                                                                         | BB233297  | 8.5845 | 10.4994 | -1.9149 |
| 1423542_at   | Klk7          | kallikrein related-peptidase 7 (chymotryptic, stratum corneum)                           | BB283507  | 4.5566 | 6.4737  | -1.9171 |
| 1429026_at   | Hexim2        | hexamethylene bis-acetamide inducible 2                                                  | BB771130  | 6.1041 | 8.0217  | -1.9176 |
| 1449443_at   | Decr1         | 2,4-dienoyl CoA reductase 1, mitochondrial                                               | NM_026172 | 5.4185 | 7.3366  | -1.9181 |
| 1452654_at   | Zdhhc2        | zinc finger, DHHC domain containing 2                                                    | BB224658  | 7.4096 | 9.3279  | -1.9183 |
| 1425660_at   | Btdb3         | BTB (POZ) domain containing 3                                                            | BC018174  | 5.7913 | 7.7111  | -1.9198 |
| 1434178_at   | Mll3          | myeloid/lymphoid or mixed-lineage leukemia 3                                             | AV297525  | 6.8298 | 8.7511  | -1.9213 |
| 1438027_at   |               |                                                                                          | BB668084  | 5.9806 | 7.9021  | -1.9216 |
| 1452424_at   | Lpar4         | lysophosphatidic acid receptor 4                                                         | AW493905  | 4.4791 | 6.4073  | -1.9282 |
| 1444726_at   | Krr1          | KRR1, small subunit (SSU) processome component, homolog (yeast)                          | AV355312  | 5.0395 | 6.9682  | -1.9287 |
| 1440007_at   | D930003E18Rik | RIKEN cDNA D930003E18 gene                                                               | BB378464  | 3.3019 | 5.2306  | -1.9287 |
| 1420363_at   | Bik           | BCL2-interacting killer                                                                  | NM_007546 | 4.6265 | 6.5565  | -1.9300 |
| 1452381_at   | Creb3l2       | cAMP responsive element binding protein 3-like 2                                         | AV021105  | 7.9941 | 9.9255  | -1.9314 |
| 1426883_at   | Slc25a45      | solute carrier family 25, member 45                                                      | AV300228  | 6.0899 | 8.0217  | -1.9318 |
| 1443267_at   |               |                                                                                          | BB345595  | 3.4443 | 5.3765  | -1.9323 |
| 1456328_at   | Bank1         | B cell scaffold protein with ankyrin repeats 1                                           | AI451642  | 4.4579 | 6.3902  | -1.9323 |
| 1451288_s_at | 1810043G02Rik | RIKEN cDNA 1810043G02 gene                                                               | BC010330  | 5.9110 | 7.8447  | -1.9337 |
| 1457704_at   | Zfp385b       | zinc finger protein 385B                                                                 | BE982894  | 5.3765 | 7.3117  | -1.9352 |
| 1436220_at   | Zfp287        | zinc finger protein 287                                                                  | BI714160  | 5.9014 | 7.8369  | -1.9355 |
| 1447100_s_at | 5730508B09Rik | RIKEN cDNA 5730508B09 gene                                                               | C80506    | 6.3376 | 8.2743  | -1.9366 |
| 1428916_s_at | Sirt5         | sirtuin 5 (silent mating type information regulation 2 homolog) 5 (S. cerevisiae)        | AK002609  | 6.6780 | 8.6155  | -1.9375 |
| 1425543_s_at | Plekha5       | pleckstrin homology domain containing, family A member 5                                 | BG067450  | 7.3026 | 9.2408  | -1.9383 |
| 1455059_at   | Helz          | helicase with zinc finger domain                                                         | BB104941  | 4.0639 | 6.0047  | -1.9408 |
| 1449118_at   | Dbt           | dihydrolipoamide branched chain transacylase E2                                          | NM_010022 | 6.8332 | 8.7755  | -1.9423 |
| 1429012_at   | Arhgef6       | Rac/Cdc42 guanine nucleotide exchange factor (GEF) 6                                     | BM246754  | 6.1388 | 8.0833  | -1.9445 |
| 1417218_at   | Calhm2        | calcium homeostasis modulator 2                                                          | NM_133746 | 4.8610 | 6.8057  | -1.9447 |
| 1419248_at   | Rgs2          | regulator of G-protein signaling 2                                                       | AF215668  | 4.7629 | 6.7079  | -1.9450 |
| 1423563_at   | Prrt1         | proline-rich transmembrane protein 1                                                     | AA739053  | 5.2432 | 7.1886  | -1.9454 |
| 1452711_at   | Atl1          | atlastin GTPase 1                                                                        | BE948928  | 4.1014 | 6.0470  | -1.9456 |
| 1434275_at   | Nkd2          | naked cuticle 2 homolog (Drosophila)                                                     | BB767757  | 4.7088 | 6.6550  | -1.9462 |
| 1418981_at   | Casp12        | caspase 12                                                                               | NM_009808 | 7.0861 | 9.0331  | -1.9469 |
| 1454972_at   | Atcay         | ataxia, cerebellar, Cayman type homolog (human)                                          | BQ042885  | 5.6110 | 7.5587  | -1.9477 |
| 1427955_a_at | Deb1          | differentially expressed in B16F10 1                                                     | AK003863  | 9.1233 | 11.0712 | -1.9479 |
| 1455700_at   | Mterfd3       | MTERF domain containing 3                                                                | BB359043  | 6.3175 | 8.2662  | -1.9487 |
| 1418895_at   | Skap2         | src family associated phosphoprotein 2                                                   | NM_018773 | 8.9431 | 10.8927 | -1.9496 |
| 1450696_at   | Psmb9         | proteasome (prosome, macropain) subunit, beta type 9 (large multifunctional peptidase 2) | NM_013585 | 7.3508 | 9.3004  | -1.9497 |
| 1433711_s_at | Sesn1         | sestrin 1                                                                                | BG076140  | 7.8572 | 9.8093  | -1.9521 |
| 1436362_x_at | 2700079J08Rik | RIKEN cDNA 2700079J08 gene                                                               | AA798895  | 8.2410 | 10.1942 | -1.9532 |
| 1451411_at   | Gprc5b        | G protein-coupled receptor, family C, group 5, member B                                  | BC020004  | 6.3311 | 8.2848  | -1.9537 |
| 1416675_s_at | Plcd1         | phospholipase C, delta 1                                                                 | NM_019676 | 6.1289 | 8.0826  | -1.9537 |
| 1427434_at   | Naip6         | NLR family, apoptosis inhibitory protein 6                                               | AI451585  | 5.5020 | 7.4557  | -1.9537 |
| 1437598_at   | Zbtb20        | zinc finger and BTB domain containing 20                                                 | BB308952  | 6.7164 | 8.6717  | -1.9553 |
| 1457316_at   | Mtap6         | microtubule-associated protein 6                                                         | BM233608  | 5.7781 | 7.7335  | -1.9554 |
| 1434179_at   | Mll3          | myeloid/lymphoid or mixed-lineage leukemia 3                                             | AV297525  | 7.0954 | 9.0513  | -1.9560 |
| 1433542_at   | Inpp5f        | inositol polyphosphate-5-phosphatase F                                                   | BB085335  | 8.0108 | 9.9670  | -1.9562 |
| 1442827_at   | Tlr4          | toll-like receptor 4                                                                     | BB148728  | 3.7406 | 5.6970  | -1.9564 |
| 1421960_at   | Adcy3         | adenylate cyclase 3                                                                      | AF458089  | 5.8107 | 7.7674  | -1.9566 |

|              |               |                                                                          |           |        |         |         |
|--------------|---------------|--------------------------------------------------------------------------|-----------|--------|---------|---------|
| 1416956_at   | Kcnab2        | potassium voltage-gated channel, shaker-related subfamily, beta member 2 | U31908    | 5.2685 | 7.2285  | -1.9600 |
| 1434140_at   | Mcf2l         | mcf.2 transforming sequence-like                                         | AV293368  | 4.9195 | 6.8811  | -1.9616 |
| 1416227_at   | Arpc1b        | actin related protein 2/3 complex, subunit 1B                            | BE979985  | 6.9596 | 8.9247  | -1.9651 |
| 1449022_at   | Nes           | nestin                                                                   | AI413223  | 8.0939 | 10.0596 | -1.9657 |
| 1455878_at   | 2700023E23Rik | RIKEN cDNA 2700023E23 gene                                               | BB822655  | 7.4720 | 9.4428  | -1.9708 |
| 1436401_at   | Ankdd1b       | ankyrin repeat and death domain containing 1B                            | AV024863  | 4.6674 | 6.6383  | -1.9708 |
| 1426375_s_at | Oxnad1        | oxidoreductase NAD-binding domain containing 1                           | AV094699  | 8.0292 | 10.0017 | -1.9725 |
| 1418260_at   | Hunk          | hormonally upregulated Neu-associated kinase                             | NM_015755 | 5.5048 | 7.4774  | -1.9727 |
| 1421194_at   | Itga4         | integrin alpha 4                                                         | NM_010576 | 4.1035 | 6.0777  | -1.9742 |
| 1454075_s_at | Nudt13        | nudix (nucleoside diphosphate linked moiety X)-type motif 13             | BC021366  | 6.4341 | 8.4117  | -1.9776 |
| 1434550_at   | 3830406C13Rik | RIKEN cDNA 3830406C13 gene                                               | AW146284  | 4.7960 | 6.7753  | -1.9794 |
| 1450663_at   | Thbs2         | thrombospondin 2                                                         | NM_011581 | 9.2379 | 11.2181 | -1.9802 |
| 1441429_at   | Irs4          | insulin receptor substrate 4                                             | BB295945  | 3.7156 | 5.6970  | -1.9813 |
| 1426530_a_at | Klh5          | kelch-like 5 (Drosophila)                                                | BM120233  | 8.6793 | 10.6633 | -1.9840 |
| 1442338_at   |               |                                                                          | BB740904  | 4.5566 | 6.5424  | -1.9858 |
| 1444564_at   | Apod          | apolipoprotein D                                                         | AV332635  | 4.6526 | 6.6421  | -1.9894 |
| 1416882_at   | Rgs10         | regulator of G-protein signalling 10                                     | NM_026418 | 6.1835 | 8.1776  | -1.9942 |
| 1455031_at   | Cdk19         | cyclin-dependent kinase 19                                               | AV278072  | 8.8170 | 10.8113 | -1.9943 |
| 1416824_at   | B230118H07Rik | RIKEN cDNA B230118H07 gene                                               | NM_026592 | 6.6801 | 8.6746  | -1.9945 |
| 1427986_a_at | Col16a1       | collagen, type XVI, alpha 1                                              | BB766878  | 8.3616 | 10.3607 | -1.9991 |
| 1428579_at   | Fmn12         | formin-like 2                                                            | AK017338  | 8.9548 | 10.9543 | -1.9995 |
| 1457024_x_at | Slc35a2       | solute carrier family 35 (UDP-galactose transporter), member A2          | BB375649  | 7.1432 | 9.1460  | -2.0028 |
| 1452889_at   | Lhpp          | phospholysine phosphohistidine inorganic pyrophosphate phosphatase       | AK009207  | 5.5699 | 7.5765  | -2.0066 |
| 1452249_at   | Prickle1      | prickle homolog 1 (Drosophila)                                           | BC022643  | 3.0872 | 5.0940  | -2.0068 |
| 1444342_at   | Nup155        | nucleoporin 155                                                          | BB162912  | 6.0989 | 8.1061  | -2.0072 |
| 1440312_at   | Elovl7        | ELOVL family member 7, elongation of long chain fatty acids (yeast)      | BQ174957  | 5.3765 | 7.3855  | -2.0090 |
| 1456563_at   | Arhgef37      | Rho guanine nucleotide exchange factor (GEF) 37                          | BB769119  | 3.9024 | 5.9119  | -2.0095 |
| 1427196_at   | Wnk4          | WNK lysine deficient protein kinase 4                                    | BG074348  | 5.4443 | 7.4557  | -2.0113 |
| 1438483_at   | Nos1          | nitric oxide synthase 1, neuronal                                        | BB794641  | 5.4443 | 7.4557  | -2.0113 |
| 1426509_s_at | Gfap          | glial fibrillary acidic protein                                          | BB183081  | 3.9701 | 5.9820  | -2.0119 |
| 1437857_at   | Dpy19l3       | dpy-19-like 3 (C. elegans)                                               | AV367203  | 5.5944 | 7.6064  | -2.0120 |
| 1439734_at   |               |                                                                          | BB767109  | 4.9937 | 7.0065  | -2.0128 |
| 1426246_at   | Pros1         | protein S (alpha)                                                        | Z25469    | 6.4857 | 8.5026  | -2.0169 |
| 1418710_at   | Cd59a         | CD59a antigen                                                            | NM_007652 | 5.7635 | 7.7805  | -2.0170 |
| 1417133_at   | Pmp22         | peripheral myelin protein 22                                             | NM_008885 | 8.3725 | 10.3961 | -2.0236 |
| 1446569_at   |               |                                                                          | BB535350  | 3.6732 | 5.6970  | -2.0238 |
| 1449836_x_at | Bik           | BCL2-interacting killer                                                  | NM_007546 | 5.6138 | 7.6381  | -2.0244 |
| 1429025_a_at | Hexim2        | hexamethylene bis-acetamide inducible 2                                  | BB771130  | 4.6674 | 6.6941  | -2.0266 |
| 1453284_at   | Fam151b       | family with sequence similarity 151, member B                            | AK015100  | 4.0372 | 6.0641  | -2.0269 |
| 1425263_a_at | Mbp           | myelin basic protein                                                     | BB181247  | 5.0107 | 7.0394  | -2.0287 |
| 1455418_at   |               |                                                                          | BM119433  | 6.9850 | 9.0139  | -2.0289 |
| 1425675_s_at | Ceacam1       | carcinoembryonic antigen-related cell adhesion molecule 1                | M77196    | 3.5127 | 5.5419  | -2.0291 |
| 1418638_at   |               |                                                                          | NM_010387 | 4.8496 | 6.8811  | -2.0315 |
| 1455614_at   | Tomm40l       | translocase of outer mitochondrial membrane 40 homolog-like (yeast)      | AV225789  | 3.6373 | 5.6689  | -2.0316 |
| 1435669_at   | Zfp532        | zinc finger protein 532                                                  | BB404446  | 6.1186 | 8.1528  | -2.0341 |
| 1446294_at   | Tcf12         | transcription factor 12                                                  | AV247132  | 6.6643 | 8.6988  | -2.0346 |
| 1441547_at   |               |                                                                          | BB453909  | 3.6342 | 5.6689  | -2.0347 |
| 1435335_a_at | Gnptab        | N-acetylglucosamine-1-phosphate transferase, alpha and beta subunits     | BG144467  | 7.8900 | 9.9256  | -2.0356 |
| 1457613_at   |               |                                                                          | BI788635  | 3.1525 | 5.1907  | -2.0382 |
| 1436346_at   | Cd109         | CD109 antigen                                                            | AV246882  | 7.9834 | 10.0264 | -2.0430 |
| 1417693_a_at | Gab1          | growth factor receptor bound protein 2-associated protein 1              | NM_021356 | 6.9111 | 8.9548  | -2.0437 |
| 1436702_at   | Nat8l         | N-acetyltransferase 8-like                                               | BE989731  | 5.3986 | 7.4447  | -2.0461 |
| 1448943_at   | Nrp1          | neuropilin 1                                                             | AK011144  | 8.0878 | 10.1355 | -2.0477 |
| 1449307_at   | Dbn1          | dysbindin (dystrobrevin binding protein 1) domain containing 1           | NM_028146 | 6.3015 | 8.3497  | -2.0482 |
| 1438662_at   | Ajap1         | adherens junction associated protein 1                                   | AW123234  | 4.1715 | 6.2200  | -2.0485 |
| 1453328_at   | 2700008G24Rik | RIKEN cDNA 2700008G24 gene                                               | AW495672  | 4.8406 | 6.8896  | -2.0491 |

|              |               |                                                                                |           |        |         |         |
|--------------|---------------|--------------------------------------------------------------------------------|-----------|--------|---------|---------|
| 1440478_at   | Nus1          | nuclear undecaprenyl pyrophosphate synthase 1 homolog ( <i>S. cerevisiae</i> ) | BM941145  | 4.2333 | 6.2831  | -2.0498 |
| 1451989_a_at | Mapre2        | microtubule-associated protein, RP/EB family, member 2                         | BC027056  | 8.8705 | 10.9208 | -2.0502 |
| 1444632_at   | BC064078      | cDNA sequence BC064078                                                         | BF658882  | 3.8523 | 5.9061  | -2.0538 |
| 1444426_at   | Cass4         | Cas scaffolding protein family member 4                                        | BB327547  | 4.6674 | 6.7217  | -2.0542 |
| 1417545_at   | Trpv4         | transient receptor potential cation channel, subfamily V, member 4             | NM_022017 | 5.3765 | 7.4308  | -2.0543 |
| 1416759_at   | Mical1        | microtubule associated monooxygenase, calponin and LIM domain containing 1     | NM_138315 | 5.2084 | 7.2656  | -2.0572 |
| 1415850_at   | Rasa3         | RAS p21 protein activator 3                                                    | NM_009025 | 9.2861 | 11.3462 | -2.0601 |
| 1424494_s_at | Flywch2       | FLYWCH family member 2                                                         | BC024947  | 5.2976 | 7.3594  | -2.0617 |
| 1433571_at   | Serinc5       | serine incorporator 5                                                          | BQ175260  | 7.1080 | 9.1721  | -2.0641 |
| 1421935_at   | Rps20         | ribosomal protein S20                                                          | BG070206  | 5.2737 | 7.3403  | -2.0666 |
| 1427515_at   | Pion          | pigeon homolog ( <i>Drosophila</i> )                                           | BB637972  | 4.5349 | 6.6030  | -2.0681 |
| 1436568_at   | Jam2          | junction adhesion molecule 2                                                   | AU016127  | 3.3080 | 5.3765  | -2.0685 |
| 1460359_at   | Armcx3        | armadillo repeat containing, X-linked 3                                        | AK004598  | 7.6381 | 9.7066  | -2.0685 |
| 1446851_at   |               |                                                                                | BB017755  | 5.1687 | 7.2372  | -2.0685 |
| 1447757_x_at | Inpp5f        | inositol polyphosphate-5-phosphatase F                                         | AV033355  | 6.0989 | 8.1707  | -2.0718 |
| 1421844_at   | Il1rap        | interleukin 1 receptor accessory protein                                       | BE285634  | 7.4472 | 9.5200  | -2.0728 |
| 1423363_at   | Sort1         | sortilin 1                                                                     | AV247637  | 5.0201 | 7.0932  | -2.0731 |
| 1437451_at   | Ecsr          | endothelial cell surface expressed chemotaxis and apoptosis regulator          | BB736636  | 4.8466 | 6.9213  | -2.0748 |
| 1456020_at   | Sh3tc2        | SH3 domain and tetratricopeptide repeats 2                                     | BB487775  | 5.4108 | 7.4882  | -2.0773 |
| 1434277_a_at | Ypel2         | yippee-like 2 ( <i>Drosophila</i> )                                            | BG069663  | 7.4864 | 9.5658  | -2.0794 |
| 1452834_at   | Prr5l         | proline rich 5 like                                                            | AK011178  | 4.7518 | 6.8313  | -2.0795 |
| 1451139_at   | Slc39a4       | solute carrier family 39 (zinc transporter), member 4                          | BC023498  | 5.0107 | 7.0932  | -2.0825 |
| 1436237_at   | Ttc9          | tetratricopeptide repeat domain 9                                              | BE947764  | 2.9710 | 5.0544  | -2.0834 |
| 1452656_at   | Zdhhc2        | zinc finger, DHHC domain containing 2                                          | BB224658  | 5.6343 | 7.7180  | -2.0836 |
| 1449514_at   | Grk5          | G protein-coupled receptor kinase 5                                            | BC019379  | 4.9657 | 7.0503  | -2.0846 |
| 1433827_at   | Atp8a1        | ATPase, aminophospholipid transporter (APLT), class I, type 8A, member 1       | AW610650  | 6.5656 | 8.6518  | -2.0862 |
| 1436877_at   | Lrch2         | leucine-rich repeats and calponin homology (CH) domain containing 2            | AV231827  | 4.4518 | 6.5383  | -2.0865 |
| 1455448_at   | Dagla         | diacylglycerol lipase, alpha                                                   | BG804066  | 7.0245 | 9.1112  | -2.0867 |
| 1455649_at   | Ttc9          | tetratricopeptide repeat domain 9                                              | BB106428  | 5.2457 | 7.3328  | -2.0871 |
| 1454849_x_at | Clu           | clusterin                                                                      | BB433678  | 8.1609 | 10.2494 | -2.0884 |
| 1449271_a_at | Hebp2         | heme binding protein 2                                                         | NM_019487 | 6.8952 | 8.9838  | -2.0886 |
| 1460274_at   | Tex19.2       | testis expressed gene 19.2                                                     | NM_027622 | 4.7040 | 6.7928  | -2.0887 |
| 1417694_at   | Gab1          | growth factor receptor bound protein 2-associated protein 1                    | NM_021356 | 6.3015 | 8.3946  | -2.0931 |
| 1429887_at   | Nos1          | nitric oxide synthase 1, neuronal                                              | AK009163  | 6.8275 | 8.9215  | -2.0939 |
| 1429144_at   | Gpcpd1        | glycerophosphocholine phosphodiesterase GDE1 homolog ( <i>S. cerevisiae</i> )  | AV291259  | 6.6332 | 8.7275  | -2.0943 |
| 1454699_at   | Sesn1         | sestrin 1                                                                      | BG076140  | 6.5268 | 8.6228  | -2.0960 |
| 1437548_at   | Bicd1         | bicaudal D homolog 1 ( <i>Drosophila</i> )                                     | AV367839  | 4.3772 | 6.4737  | -2.0966 |
| 1424419_at   | Lrrc14        | leucine rich repeat containing 14                                              | BC022126  | 6.2224 | 8.3198  | -2.0974 |
| 1437858_at   | Dpy19l3       | dpy-19-like 3 ( <i>C. elegans</i> )                                            | AV367203  | 5.0904 | 7.1886  | -2.0982 |
| 1458648_at   | AU042950      | expressed sequence AU042950                                                    | AU042950  | 3.5127 | 5.6110  | -2.0983 |
| 1455362_at   | Angel2        | angel homolog 2 ( <i>Drosophila</i> )                                          | AV275390  | 4.8229 | 6.9213  | -2.0984 |
| 1436796_at   |               |                                                                                | BB237072  | 7.5078 | 9.6091  | -2.1014 |
| 1447849_s_at | Maf           | avian musculoaponeurotic fibrosarcoma (v-maf) AS42 oncogene homolog            | AV323441  | 4.2333 | 6.3376  | -2.1043 |
| 1449580_s_at |               |                                                                                | NM_010388 | 5.4059 | 7.5121  | -2.1062 |
| 1443253_at   |               |                                                                                | BI076661  | 4.6990 | 6.8057  | -2.1067 |
| 1434456_at   | Rundc3b       | RUN domain containing 3B                                                       | BG075955  | 4.4924 | 6.6030  | -2.1106 |
| 1451912_a_at | Fgfr1         | fibroblast growth factor receptor-like 1                                       | AF321301  | 8.3586 | 10.4702 | -2.1116 |
| 1429549_at   | Col27a1       | collagen, type XXVII, alpha 1                                                  | BB044654  | 5.0544 | 7.1687  | -2.1142 |
| 1456984_at   | Scml2         | sex comb on midleg-like 2 ( <i>Drosophila</i> )                                | AV322078  | 3.5815 | 5.6970  | -2.1155 |
| 1447623_s_at | Prkd1         | protein kinase D1                                                              | AV297026  | 5.6784 | 7.7942  | -2.1158 |
| 1447825_x_at | Pcdh8         | protocadherin 8                                                                | BB076893  | 3.5810 | 5.6970  | -2.1160 |
| 1416022_at   | Fabp5         | fatty acid binding protein 5, epidermal                                        | BC002008  | 9.5803 | 11.6990 | -2.1187 |
| 1442129_at   | 1810058I24Rik | RIKEN cDNA 1810058I24 gene                                                     | AI848234  | 5.0952 | 7.2147  | -2.1195 |
| 1433583_at   | Zfp365        | zinc finger protein 365                                                        | AV327248  | 7.1190 | 9.2407  | -2.1217 |
| 1435596_at   | Pion          | pigeon homolog ( <i>Drosophila</i> )                                           | BB820613  | 6.9948 | 9.1186  | -2.1238 |
| 1435605_at   | Actr3b        | ARP3 actin-related protein 3B                                                  | BB125424  | 4.2135 | 6.3376  | -2.1242 |
| 1457869_at   | Gm10451       | predicted gene 10451                                                           | BB745211  | 3.9024 | 6.0270  | -2.1246 |
| 1436277_at   | Rnf207        | ring finger protein 207                                                        | BI734893  | 4.6674 | 6.7928  | -2.1253 |

|              |               |                                                                                   |           |        |         |         |
|--------------|---------------|-----------------------------------------------------------------------------------|-----------|--------|---------|---------|
| 1434265_s_at | Ank2          | ankyrin 2, brain                                                                  | BQ174638  | 6.4742 | 8.6007  | -2.1265 |
| 1430755_at   | 4930452G13Rik | RIKEN cDNA 4930452G13 gene                                                        | BF018617  | 4.9107 | 7.0394  | -2.1287 |
| 1426917_s_at | Scrn3         | secernin 3                                                                        | BM211317  | 6.4211 | 8.5517  | -2.1305 |
| 1455216_at   | Paqr6         | progesterin and adipoc receptor family member VI                                  | BI408433  | 5.7781 | 7.9099  | -2.1318 |
| 1422126_a_at | Nudt13        | nudix (nucleoside diphosphate linked moiety X)-type motif 13                      | NM_026341 | 6.7064 | 8.8399  | -2.1334 |
| 1419043_a_at | ligp1         | interferon inducible GTPase 1                                                     | BM239828  | 6.6564 | 8.7918  | -2.1354 |
| 1441305_at   | Nedd4l        | neural precursor cell expressed, developmentally down-regulated gene 4-like       | BB360028  | 3.3086 | 5.4443  | -2.1358 |
| 1457664_x_at | C2            | complement component 2 (within H-2S)                                              | AV227574  | 5.0683 | 7.2050  | -2.1367 |
| 1436528_at   | Kazald1       | Kazal-type serine peptidase inhibitor domain 1                                    | AI842353  | 6.1246 | 8.2615  | -2.1369 |
| 1426280_at   | Wdpcp         | WD repeat containing protein polarity effector                                    | AF424701  | 4.9529 | 7.0932  | -2.1403 |
| 1423578_at   | Col11a2       | collagen, type XI, alpha 2                                                        | AV242706  | 4.2978 | 6.4409  | -2.1431 |
| 1456841_at   | Gm4961        | kinesin superfamily protein 2C pseudogene                                         | BM228768  | 5.0050 | 7.1485  | -2.1435 |
| 1418365_at   | Ctsh          | cathepsin H                                                                       | NM_007801 | 5.8724 | 8.0161  | -2.1437 |
| 1443324_at   |               |                                                                                   | BI454325  | 4.4942 | 6.6421  | -2.1478 |
| 1445849_at   | BC080696      | cDNA sequence BC080696                                                            | BG070782  | 5.3239 | 7.4724  | -2.1485 |
| 1417782_at   | Lass4         | LAG1 homolog, ceramide synthase 4                                                 | BB006809  | 4.4668 | 6.6156  | -2.1488 |
| 1430776_s_at | Ankrd24       | ankyrin repeat domain 24                                                          | AK017778  | 6.9823 | 9.1328  | -2.1504 |
| 1433965_at   | Atp8a1        | ATPase, aminophospholipid transporter (APLT), class I, type 8A, member 1          | BQ176779  | 4.8012 | 6.9566  | -2.1554 |
| 1435835_at   | Mks1          | Meckel syndrome, type 1                                                           | BB033151  | 5.3001 | 7.4557  | -2.1556 |
| 1448241_at   | Gm2a          | GM2 ganglioside activator protein                                                 | BC004651  | 8.3072 | 10.4633 | -2.1560 |
| 1428122_s_at | Fam125b       | family with sequence similarity 125, member B                                     | AK012178  | 8.3087 | 10.4656 | -2.1569 |
| 1451750_at   | Irak4         | interleukin-1 receptor-associated kinase 4                                        | BM220651  | 4.9459 | 7.1037  | -2.1578 |
| 1439787_at   | P2rx7         | purinergic receptor P2X, ligand-gated ion channel, 7                              | BM124050  | 8.0757 | 10.2371 | -2.1614 |
| 1429138_at   | Npas3         | neuronal PAS domain protein 3                                                     | BB391772  | 5.5273 | 7.6903  | -2.1630 |
| 1449482_at   | Hist3h2ba     | histone cluster 3, H2ba                                                           | NM_030082 | 4.6674 | 6.8313  | -2.1639 |
| 1448944_at   | Nrp1          | neuropilin 1                                                                      | AK011144  | 6.7797 | 8.9468  | -2.1671 |
| 1416204_at   | Gpd1          | glycerol-3-phosphate dehydrogenase 1 (soluble)                                    | BC019391  | 4.9150 | 7.0826  | -2.1676 |
| 1448426_at   | Sardh         | sarcosine dehydrogenase                                                           | BI217574  | 4.7903 | 6.9583  | -2.1680 |
| 1427943_at   | Acyp2         | acylphosphatase 2, muscle type                                                    | BI730288  | 5.7588 | 7.9273  | -2.1685 |
| 1454169_a_at | Epsti1        | epithelial stromal interaction 1 (breast)                                         | AK017174  | 3.0227 | 5.1918  | -2.1691 |
| 1450698_at   | Dusp2         | dual specificity phosphatase 2                                                    | L11330    | 7.0210 | 9.1920  | -2.1710 |
| 1429736_at   | Qk            | quaking                                                                           | BB659256  | 5.5091 | 7.6809  | -2.1718 |
| 1450247_a_at | Scamp5        | secretory carrier membrane protein 5                                              | NM_020270 | 6.1627 | 8.3353  | -2.1725 |
| 1437829_s_at | Eef2k         | eukaryotic elongation factor-2 kinase                                             | C86191    | 8.1177 | 10.2906 | -2.1730 |
| 1444749_at   |               |                                                                                   | BB427399  | 3.5127 | 5.6873  | -2.1746 |
| 1423005_a_at | Espn          | espin                                                                             | NM_019585 | 4.2986 | 6.4737  | -2.1751 |
| 1439665_at   | Lpar4         | lysophosphatidic acid receptor 4                                                  | BB417145  | 5.9357 | 8.1114  | -2.1757 |
| 1418412_at   | Tpd52l1       | tumor protein D52-like 1                                                          | NM_009413 | 6.4629 | 8.6386  | -2.1757 |
| 1455111_at   | Yip6          | Yip1 domain family, member 6                                                      | AV298249  | 7.4401 | 9.6163  | -2.1762 |
| 1426316_at   | 6330416G13Rik | RIKEN cDNA 6330416G13 gene                                                        | AV326978  | 5.8041 | 7.9804  | -2.1762 |
| 1417300_at   | Smpdl3b       | sphingomyelin phosphodiesterase, acid-like 3B                                     | NM_133888 | 6.4767 | 8.6566  | -2.1799 |
| 1417779_at   | Ntpcr         | nucleoside-triphosphatase, cancer-related                                         | NM_025636 | 6.4409 | 8.6226  | -2.1817 |
| 1418626_a_at | Clu           | clusterin                                                                         | NM_013492 | 7.3532 | 9.5381  | -2.1850 |
| 1425092_at   | Cdh10         | cadherin 10                                                                       | AF183946  | 4.4414 | 6.6307  | -2.1893 |
| 1429447_at   | Evc2          | Ellis van Creveld syndrome 2                                                      | AK003753  | 7.8709 | 10.0610 | -2.1901 |
| 1429007_at   | Slc35b2       | solute carrier family 35, member B2                                               | AK003377  | 6.4952 | 8.6869  | -2.1917 |
| 1421695_at   | Strc          | stereocilin                                                                       | NM_080459 | 5.4318 | 7.6236  | -2.1918 |
| 1416164_at   | Fbln5         | fibulin 5                                                                         | NM_011812 | 4.4196 | 6.6129  | -2.1933 |
| 1439795_at   | Gpr64         | G protein-coupled receptor 64                                                     | AV242919  | 4.3192 | 6.5127  | -2.1935 |
| 1452650_at   | Trim62        | tripartite motif-containing 62                                                    | AK018173  | 3.5004 | 5.6970  | -2.1966 |
| 1416654_at   | Slc31a2       | solute carrier family 31, member 2                                                | NM_025286 | 6.5834 | 8.7810  | -2.1976 |
| 1429798_s_at | Cmtm5         | CKLF-like MARVEL transmembrane domain containing 5                                | AV029626  | 5.9050 | 8.1114  | -2.2064 |
| 1426604_at   | Rnasel        | ribonuclease L (2', 5'-oligoadenylate synthetase-dependent)                       | BF714880  | 5.3580 | 7.5689  | -2.2109 |
| 1440286_at   | Fbxl16        | F-box and leucine-rich repeat protein 16                                          | BM232403  | 6.2883 | 8.5007  | -2.2124 |
| 1436513_at   | Tanc2         | tetratricopeptide repeat, ankyrin repeat and coiled-coil containing 2             | BM208226  | 7.1296 | 9.3485  | -2.2189 |
| 1447521_x_at | Arhgap39      | Rho GTPase activating protein 39                                                  | AI843066  | 8.0267 | 10.2462 | -2.2195 |
| 1453192_at   | Fam101a       | family with sequence similarity 101, member A                                     | AK014112  | 4.0372 | 6.2582  | -2.2210 |
| 1459903_at   | Sema7a        | sema domain, immunoglobulin domain (Ig), and GPI membrane anchor, (semaphorin) 7A | AA144045  | 6.0042 | 8.2266  | -2.2224 |
| 1449823_at   | Dach2         | dachshund 2 (Drosophila)                                                          | NM_033605 | 4.4196 | 6.6421  | -2.2224 |
| 1433509_s_at | Reep1         | receptor accessory protein 1                                                      | BQ174328  | 3.8971 | 6.1198  | -2.2227 |

|              |               |                                                                    |           |        |         |         |
|--------------|---------------|--------------------------------------------------------------------|-----------|--------|---------|---------|
| 1452432_at   | Tfpi          | tissue factor pathway inhibitor                                    | BF451808  | 5.5198 | 7.7451  | -2.2253 |
| 1451990_at   | Mapre2        | microtubule-associated protein, RP/EB family, member 2             | BC027056  | 5.0401 | 7.2656  | -2.2255 |
| 1434780_at   | Mtus2         | microtubule associated tumor suppressor candidate 2                | AU067634  | 4.8558 | 7.0826  | -2.2268 |
| 1434997_at   | Cdk19         | cyclin-dependent kinase 19                                         | BB510904  | 7.3056 | 9.5336  | -2.2280 |
| 1451301_at   | Tmod2         | tropomodulin 2                                                     | BB633110  | 4.5163 | 6.7457  | -2.2293 |
| 1418211_at   | Oca2          | oculocutaneous albinism II                                         | NM_021879 | 4.6265 | 6.8564  | -2.2299 |
| 1429718_at   | Slitrk5       | SLIT and NTRK-like family, member 5                                | BB782729  | 3.3196 | 5.5508  | -2.2311 |
| 1426288_at   | Lrp4          | low density lipoprotein receptor-related protein 4                 | AF247637  | 3.8158 | 6.0489  | -2.2331 |
| 1437458_x_at | Clu           | clusterin                                                          | AV075715  | 7.8961 | 10.1334 | -2.2373 |
| 1449315_at   | Odz3          | odd Oz/ten-m homolog 3 (Drosophila)                                | NM_011857 | 9.2889 | 11.5281 | -2.2391 |
| 1456111_at   | Nxpe4         | neurexophilin and PC-esterase domain family, member 4              | BB072624  | 3.8079 | 6.0489  | -2.2410 |
| 1451268_at   | Tram111       | translocation associated membrane protein 1-like 1                 | BC027120  | 3.8756 | 6.1198  | -2.2442 |
| 1456838_at   | Lingo3        | leucine rich repeat and Ig domain containing 3                     | BE995608  | 5.7171 | 7.9631  | -2.2460 |
| 1452353_at   | Gpr155        | G protein-coupled receptor 155                                     | BB762731  | 4.0237 | 6.2723  | -2.2486 |
| 1433586_at   | Rgmb          | RGM domain family, member B                                        | BB612707  | 6.7897 | 9.0385  | -2.2488 |
| 1433558_at   | Dab2ip        | disabled 2 interacting protein                                     | BM231046  | 6.0646 | 8.3135  | -2.2489 |
| 1430073_at   | Kbtbd11       | kelch repeat and BTB (POZ) domain containing 11                    | BB767924  | 5.2685 | 7.5186  | -2.2501 |
| 1434151_at   | Mettl7a1      | methyltransferase like 7A1                                         | AV171622  | 5.6772 | 7.9280  | -2.2508 |
| 1416982_at   | Foxo1         | forkhead box O1                                                    | AI462296  | 5.7818 | 8.0347  | -2.2529 |
| 1439864_at   | Ccdc40        | coiled-coil domain containing 40                                   | AV280756  | 4.6675 | 6.9213  | -2.2538 |
| 1455425_at   | Tet1          | tet methylcytosine dioxygenase 1                                   | BG071655  | 3.0872 | 5.3414  | -2.2542 |
| 1440199_at   | Slc25a48      | solute carrier family 25, member 48                                | AU042494  | 4.4258 | 6.6801  | -2.2543 |
| 1416586_at   | Zfp239        | zinc finger protein 239                                            | NM_008616 | 6.4572 | 8.7149  | -2.2577 |
| 1431002_x_at | Fahd2a        | fumarylacetoacetate hydrolase domain containing 2A                 | AK002291  | 4.1319 | 6.3902  | -2.2583 |
| 1439247_at   | Dock10        | dedicator of cytokinesis 10                                        | BB763030  | 3.0872 | 5.3455  | -2.2583 |
| 1428681_at   | Gm608         | predicted gene 608                                                 | AK017426  | 6.7665 | 9.0276  | -2.2610 |
| 1437689_x_at | Clu           | clusterin                                                          | AV152288  | 7.9431 | 10.2056 | -2.2625 |
| 1434445_at   | Arhgap39      | Rho GTPase activating protein 39                                   | BB403657  | 5.3062 | 7.5689  | -2.2627 |
| 1423753_at   | Bambi         | BMP and activin membrane-bound inhibitor, homolog (Xenopus laevis) | AF153440  | 4.7270 | 6.9911  | -2.2641 |
| 1460255_at   | Tnfsf13b      | tumor necrosis factor (ligand) superfamily, member 13b             | NM_033622 | 4.0913 | 6.3554  | -2.2641 |
| 1455028_at   | Mapt          | microtubule-associated protein tau                                 | BQ178510  | 4.2977 | 6.5630  | -2.2654 |
| 1429308_at   | Prdm16        | PR domain containing 16                                            | BF471654  | 3.6220 | 5.8877  | -2.2658 |
| 1448686_at   | Il16          | interleukin 16                                                     | BC026894  | 5.0733 | 7.3417  | -2.2684 |
| 1424783_a_at |               |                                                                    | BC019434  | 7.1500 | 9.4190  | -2.2690 |
| 1435827_at   | 4933404O12Rik | RIKEN cDNA 4933404O12 gene                                         | BB501711  | 5.2185 | 7.4882  | -2.2696 |
| 1441170_a_at | Dab2ip        | disabled 2 interacting protein                                     | BB531641  | 6.1173 | 8.3907  | -2.2734 |
| 1420665_at   | Itgb3bp       | integrin beta 3 binding protein (beta5-ondorexin)                  | NM_026348 | 4.1664 | 6.4409  | -2.2745 |
| 1448700_at   | G0s2          | G0/G1 switch gene 2                                                | NM_008059 | 4.8933 | 7.1687  | -2.2754 |
| 1421921_at   | Serpina3m     | serine (or cysteine) peptidase inhibitor, clade A, member 3M       | BC011158  | 3.7037 | 5.9820  | -2.2783 |
| 1434378_a_at | Mxd4          | Max dimerization protein 4                                         | BG868949  | 7.5015 | 9.7817  | -2.2802 |
| 1416983_s_at | Foxo1         | forkhead box O1                                                    | AI462296  | 7.1066 | 9.3870  | -2.2805 |
| 1419706_a_at | Akap12        | A kinase (PRKA) anchor protein (gravin) 12                         | NM_031185 | 5.1375 | 7.4196  | -2.2821 |
| 1428333_at   | Arxes2        | adipocyte-related X-chromosome expressed sequence 2                | AK013740  | 5.5091 | 7.7936  | -2.2845 |
| 1419793_at   | D5Ert615e     | DNA segment, Chr 5, ERATO Doi 615, expressed                       | BG069991  | 4.6127 | 6.8973  | -2.2846 |
| 1455626_at   | Hoxa9         | homeobox A9                                                        | AA987181  | 3.7636 | 6.0489  | -2.2854 |
| 1422550_a_at | Mtap6         | microtubule-associated protein 6                                   | NM_010837 | 6.2987 | 8.5845  | -2.2858 |
| 1430153_at   | Tmod2         | tropomodulin 2                                                     | AK018223  | 3.2576 | 5.5455  | -2.2879 |
| 1449953_at   | Itgb3bp       | integrin beta 3 binding protein (beta5-ondorexin)                  | NM_026348 | 3.9701 | 6.2582  | -2.2881 |
| 1430543_at   | Clip3         | CAP-GLY domain containing linker protein 3                         | AK005167  | 4.7725 | 7.0611  | -2.2886 |
| 1452204_at   | Anks1         | ankyrin repeat and SAM domain containing 1                         | BB325223  | 7.2692 | 9.5588  | -2.2896 |
| 1415818_at   | Anxa6         | annexin A6                                                         | NM_013472 | 6.9113 | 9.2018  | -2.2905 |
| 1454658_at   | Ilvbl         | ilvB (bacterial acetolactate synthase)-like                        | BI408416  | 8.0779 | 10.3695 | -2.2915 |
| 1456053_at   |               |                                                                    | AV350923  | 3.3762 | 5.6689  | -2.2927 |
| 1430316_at   | Ispd          | isoprenoid synthase domain containing                              | BB454777  | 4.0074 | 6.3015  | -2.2941 |
| 1426573_at   | Me2           | malic enzyme 2, NAD(+)-dependent, mitochondrial                    | BM235734  | 6.9060 | 9.2043  | -2.2983 |
| 1415907_at   | Ccnd3         | cyclin D3                                                          | NM_007632 | 9.0626 | 11.3613 | -2.2987 |
| 1460734_at   | Col9a3        | collagen, type IX, alpha 3                                         | BG074456  | 5.6701 | 7.9689  | -2.2988 |

|              |               |                                                                                          |           |        |         |         |
|--------------|---------------|------------------------------------------------------------------------------------------|-----------|--------|---------|---------|
| 1449265_at   | Casp1         | caspase 1                                                                                | BC008152  | 6.3598 | 8.6613  | -2.3016 |
| 1452639_at   | Enpp4         | ectonucleotide pyrophosphatase/phosphodiesterase 4                                       | BG920295  | 4.4467 | 6.7488  | -2.3021 |
| 1434788_at   | Fzd3          | frizzled homolog 3 (Drosophila)                                                          | BQ175713  | 6.5249 | 8.8272  | -2.3023 |
| 1434439_at   | Gsk3b         | glycogen synthase kinase 3 beta                                                          | BQ175580  | 5.0830 | 7.3855  | -2.3025 |
| 1449129_a_at | Kcnip3        | Kv channel interacting protein 3, calsenilin                                             | AF300870  | 4.5691 | 6.8777  | -2.3086 |
| 1448755_at   | Col15a1       | collagen, type XV, alpha 1                                                               | AF011450  | 5.0970 | 7.4112  | -2.3142 |
| 1441022_at   | Arih1         | ariadne ubiquitin-conjugating enzyme E2 binding protein homolog 1 (Drosophila)           | BB354785  | 5.1856 | 7.5015  | -2.3160 |
| 1441891_x_at | Elovl7        | ELOVL family member 7, elongation of long chain fatty acids (yeast)                      | BB338945  | 6.9828 | 9.2989  | -2.3161 |
| 1434982_at   | Rnf182        | ring finger protein 182                                                                  | AV327376  | 4.7207 | 7.0376  | -2.3169 |
| 1436119_at   | Aldh1l2       | aldehyde dehydrogenase 1 family, member L2                                               | BM231794  | 8.9253 | 11.2431 | -2.3178 |
| 1439007_at   | Alg6          | asparagine-linked glycosylation 6 (alpha-1,3,-glucosyltransferase)                       | BB284309  | 6.9332 | 9.2531  | -2.3199 |
| 1429178_at   | Odz3          | odd Oz/ten-m homolog 3 (Drosophila)                                                      | BB472509  | 7.3768 | 9.6972  | -2.3204 |
| 1442957_at   | G730013B05Rik | RIKEN cDNA G730013B05 gene                                                               | BG075059  | 8.0975 | 10.4188 | -2.3212 |
| 1428870_at   | Nolc1         | nucleolar and coiled-body phosphoprotein 1                                               | BM213850  | 7.2481 | 9.5715  | -2.3234 |
| 1443961_at   |               |                                                                                          | BG071029  | 5.9820 | 8.3071  | -2.3251 |
| 1417928_at   | Pdim4         | PDZ and LIM domain 4                                                                     | NM_019417 | 8.8944 | 11.2198 | -2.3254 |
| 1418959_at   | Tmprss5       | transmembrane protease, serine 5 (spinesin)                                              | NM_030709 | 4.9713 | 7.2971  | -2.3258 |
| 1424988_at   | Myliip        | myosin regulatory light chain interacting protein                                        | BC010206  | 8.7216 | 11.0478 | -2.3262 |
| 1425427_at   | LOC639910     | 2-cell-stage, variable group, member 1-like                                              | AF067058  | 3.4443 | 5.7715  | -2.3272 |
| 1422781_at   | Tlr3          | toll-like receptor 3                                                                     | NM_126166 | 4.3524 | 6.6801  | -2.3277 |
| 1455781_at   |               |                                                                                          | AU067804  | 4.7821 | 7.1176  | -2.3355 |
| 1436212_at   | Tmem71        | transmembrane protein 71                                                                 | AV173260  | 6.0267 | 8.3629  | -2.3362 |
| 1436584_at   | Spry2         | sprouty homolog 2 (Drosophila)                                                           | BB529691  | 8.4882 | 10.8269 | -2.3387 |
| 1460447_at   | Pus7l         | pseudouridylate synthase 7 homolog (S. cerevisiae)-like                                  | AK019372  | 6.0374 | 8.3774  | -2.3400 |
| 1452739_at   | Fbxo7         | F-box protein 7                                                                          | AK010499  | 7.7063 | 10.0465 | -2.3402 |
| 1421908_a_at | Tcf12         | transcription factor 12                                                                  | NM_011544 | 8.5845 | 10.9252 | -2.3407 |
| 1456543_at   | Prokr1        | prokineticin receptor 1                                                                  | BB037474  | 5.3992 | 7.7418  | -2.3426 |
| 1415951_at   | Fkbp10        | FK506 binding protein 10                                                                 | NM_010221 | 6.5638 | 8.9065  | -2.3427 |
| 1444177_at   | E330020D12Rik | Riken cDNA E330020D12 gene                                                               | AI451538  | 4.4793 | 6.8247  | -2.3454 |
| 1434919_at   | Agps          | alkylglycerone phosphate synthase                                                        | BQ176868  | 5.6970 | 8.0437  | -2.3467 |
| 1429809_at   | Tmtc2         | transmembrane and tetratricopeptide repeat containing 2                                  | AK018506  | 3.6067 | 5.9554  | -2.3487 |
| 1422597_at   | Mmp15         | matrix metalloproteinase 15                                                              | NM_008609 | 5.4508 | 7.8001  | -2.3493 |
| 1418666_at   | Ptx3          | pentraxin related gene                                                                   | NM_008987 | 3.9701 | 6.3197  | -2.3496 |
| 1430520_at   | Cpne8         | copine VIII                                                                              | AW548480  | 5.3311 | 7.6809  | -2.3499 |
| 1422962_a_at | Psmb8         | proteasome (prosome, macropain) subunit, beta type 8 (large multifunctional peptidase 7) | NM_010724 | 9.0238 | 11.3770 | -2.3531 |
| 1435069_at   | BC064078      | cDNA sequence BC064078                                                                   | AW493518  | 5.3765 | 7.7316  | -2.3551 |
| 1448449_at   | Ripk3         | receptor-interacting serine-threonine kinase 3                                           | NM_019955 | 5.1723 | 7.5278  | -2.3555 |
| 1424985_a_at | Sox10         | SRY-box containing gene 10                                                               | BC025171  | 6.1661 | 8.5231  | -2.3570 |
| 1453651_a_at | Mpc1          | mitochondrial pyruvate carrier 1                                                         | AV223468  | 8.8690 | 11.2282 | -2.3593 |
| 1429830_a_at | Cd59a         | CD59a antigen                                                                            | AK005507  | 5.0970 | 7.4611  | -2.3642 |
| 1426399_at   | Vwa1          | von Willebrand factor A domain containing 1                                              | BB183736  | 5.2164 | 7.5840  | -2.3677 |
| 1418084_at   | Nrp1          | neuropilin 1                                                                             | AK011144  | 7.1687 | 9.5389  | -2.3702 |
| 1421644_at   | Sln3          | schlafen 3                                                                               | NM_011409 | 2.8966 | 5.2685  | -2.3719 |
| 1416188_at   | Gm2a          | GM2 ganglioside activator protein                                                        | BC004651  | 6.4551 | 8.8272  | -2.3721 |
| 1434264_at   | Ank2          | ankyrin 2, brain                                                                         | BQ174638  | 6.1198 | 8.4940  | -2.3742 |
| 1451679_at   | Arxes1        | adipocyte-related X-chromosome expressed sequence 1                                      | BC016270  | 4.5818 | 6.9566  | -2.3749 |
| 1449471_at   | Kcnmb4        | potassium large conductance calcium-activated channel, subfamily M, beta member 4        | NM_021452 | 5.9071 | 8.2848  | -2.3777 |
| 1434662_at   | Atg4a         | autophagy related 4A, cysteine peptidase                                                 | BM237732  | 7.4140 | 9.7918  | -2.3778 |
| 1420422_at   | Pcdhb21       | protocadherin beta 21                                                                    | NM_053146 | 3.8399 | 6.2200  | -2.3800 |
| 1460208_at   | Fbn1          | fibrillin 1                                                                              | NM_007993 | 5.0506 | 7.4308  | -2.3802 |
| 1422945_a_at | Kif5c         | kinesin family member 5C                                                                 | AI844677  | 4.9224 | 7.3026  | -2.3802 |
| 1444009_at   | Rassf4        | Ras association (RalGDS/AF-6) domain family member 4                                     | AV217868  | 4.8435 | 7.2276  | -2.3841 |
| 1436502_at   | Mtus1         | mitochondrial tumor suppressor 1                                                         | BB747681  | 4.3083 | 6.6941  | -2.3857 |
| 1455582_at   | C1qtnf1       | C1q and tumor necrosis factor related protein 1                                          | BI156044  | 6.7524 | 9.1407  | -2.3883 |
| 1417627_a_at | Limk1         | LIM-domain containing, protein kinase                                                    | NM_010717 | 7.6605 | 10.0515 | -2.3910 |
| 1426711_at   | Tmco3         | transmembrane and coiled-coil domains 3                                                  | BM114609  | 6.4090 | 8.8005  | -2.3915 |
| 1434049_at   | Entpd3        | ectonucleoside triphosphate diphosphohydrolase 3                                         | BB547934  | 5.2306 | 7.6228  | -2.3922 |
| 1449297_at   | Casp12        | caspase 12                                                                               | NM_009808 | 6.1458 | 8.5387  | -2.3929 |



|              |               |                                                                                        |           |        |         |         |
|--------------|---------------|----------------------------------------------------------------------------------------|-----------|--------|---------|---------|
| 1459847_x_at | Gfra2         | glial cell line derived neurotrophic factor family receptor alpha 2                    | AV354240  | 5.2131 | 7.6064  | -2.3933 |
| 1417558_at   | Fyn           | Fyn proto-oncogene                                                                     | NM_008054 | 6.9219 | 9.3171  | -2.3952 |
| 1454733_at   | Nod1          | nucleotide-binding oligomerization domain containing 1                                 | BB138330  | 5.9844 | 8.3817  | -2.3974 |
| 1434945_at   | Lpcat2        | lysophosphatidylcholine acyltransferase 2                                              | AW743924  | 9.3341 | 11.7320 | -2.3979 |
| 1457319_at   | A130038J17Rik | RIKEN cDNA A130038J17 gene                                                             | BB216233  | 4.0262 | 6.4242  | -2.3980 |
| 1453191_at   | Col27a1       | collagen, type XXVII, alpha 1                                                          | BB044654  | 5.6495 | 8.0510  | -2.4015 |
| 1442977_at   |               |                                                                                        | BG075843  | 5.3499 | 7.7518  | -2.4019 |
| 1417781_at   | Lass4         | LAG1 homolog, ceramide synthase 4                                                      | BB006809  | 4.6127 | 7.0173  | -2.4045 |
| 1425113_x_at |               |                                                                                        | BC020068  | 7.1689 | 9.5772  | -2.4083 |
| 1460623_at   | Skap2         | src family associated phosphoprotein 2                                                 | BB753881  | 7.0816 | 9.4909  | -2.4093 |
| 1449682_s_at |               |                                                                                        | C79445    | 7.9416 | 10.3510 | -2.4094 |
| 1419107_at   | Ophn1         | oligophrenin 1                                                                         | B1134110  | 4.9657 | 7.3768  | -2.4111 |
| 1431780_at   | Cdhr4         | cadherin-related family member 4                                                       | AK006216  | 4.2333 | 6.6448  | -2.4115 |
| 1417307_at   | Dmd           | dystrophin, muscular dystrophy                                                         | NM_007868 | 4.5681 | 6.9797  | -2.4115 |
| 1454646_at   | Tcp112        | t-complex 11 (mouse) like 2                                                            | BM245221  | 5.0970 | 7.5121  | -2.4151 |
| 1440354_at   | Elovl7        | ELOVL family member 7, elongation of long chain fatty acids (yeast)                    | BB149977  | 4.0956 | 6.5167  | -2.4211 |
| 1455164_at   | Arhgap31      | Rho GTPase activating protein 31                                                       | AV308092  | 6.2111 | 8.6350  | -2.4238 |
| 1448548_at   | Tulp4         | tubby like protein 4                                                                   | NM_054040 | 9.8967 | 12.3224 | -2.4257 |
| 1453571_at   | Deptor        | DEP domain containing MTOR-interacting protein                                         | BB324973  | 7.1398 | 9.5658  | -2.4260 |
| 1441091_at   | Elovl7        | ELOVL family member 7, elongation of long chain fatty acids (yeast)                    | BQ175164  | 4.0619 | 6.4898  | -2.4280 |
| 1448415_a_at | Sema3b        | sema domain, immunoglobulin domain (Ig), short basic domain, secreted, (semaphorin) 3B | NM_009153 | 6.0588 | 8.4900  | -2.4312 |
| 1441069_at   | Zdhhc23       | zinc finger, DHHC domain containing 23                                                 | BG069709  | 5.0675 | 7.5015  | -2.4340 |
| 1419200_at   | Fxyd7         | FXFD domain-containing ion transport regulator 7                                       | NM_022007 | 4.0372 | 6.4737  | -2.4365 |
| 1441105_at   | Gm11110       | predicted gene 11110                                                                   | BE980314  | 4.3688 | 6.8057  | -2.4369 |
| 1424568_at   | Tspan2        | tetraspanin 2                                                                          | BC007185  | 6.2262 | 8.6642  | -2.4380 |
| 1424841_s_at | Rbks          | ribokinase                                                                             | BC023339  | 5.2504 | 7.6903  | -2.4399 |
| 1424098_at   | Elovl7        | ELOVL family member 7, elongation of long chain fatty acids (yeast)                    | BC005602  | 5.7952 | 8.2362  | -2.4410 |
| 1433789_at   | Snhg3         | small nucleolar RNA host gene (non-protein coding) 3                                   | BI082172  | 7.2818 | 9.7328  | -2.4510 |
| 1428260_at   | Atl1          | atlastin GTPase 1                                                                      | BE948928  | 4.0372 | 6.4898  | -2.4527 |
| 1425603_at   | Tmem176a      | transmembrane protein 176A                                                             | BC006049  | 5.3840 | 7.8384  | -2.4544 |
| 1442334_at   |               |                                                                                        | BB711873  | 4.9195 | 7.3855  | -2.4660 |
| 1438530_at   | Tfpi          | tissue factor pathway inhibitor                                                        | BB756069  | 6.4574 | 8.9262  | -2.4688 |
| 1424097_at   | Elovl7        | ELOVL family member 7, elongation of long chain fatty acids (yeast)                    | BC005602  | 6.5341 | 9.0081  | -2.4740 |
| 1434960_at   | Taf9b         | TAF9B RNA polymerase II, TATA box binding protein (TBP)-associated factor              | AW555571  | 2.8674 | 5.3414  | -2.4740 |
| 1452404_at   | Phactr2       | phosphatase and actin regulator 2                                                      | BB321846  | 3.3730 | 5.8487  | -2.4756 |
| 1457426_at   | 1700048O20Rik | RIKEN cDNA 1700048O20 gene                                                             | BE980678  | 3.7049 | 6.1807  | -2.4758 |
| 1416432_at   | Pfkfb3        | 6-phosphofructo-2-kinase/fructose-2,6-biphosphatase 3                                  | NM_133232 | 4.6711 | 7.1586  | -2.4876 |
| 1428800_a_at | Pus7l         | pseudouridylate synthase 7 homolog (S. cerevisiae)-like                                | AK019372  | 6.9327 | 9.4211  | -2.4884 |
| 1439882_at   | Sec23ip       | Sec23 interacting protein                                                              | BE685845  | 7.1113 | 9.6022  | -2.4908 |
| 1450944_at   | Cspg4         | chondroitin sulfate proteoglycan 4                                                     | BB377873  | 6.0470 | 8.5387  | -2.4916 |
| 1448382_at   | Ehhadh        | enoyl-Coenzyme A, hydratase/3-hydroxyacyl Coenzyme A dehydrogenase                     | NM_023737 | 3.3103 | 5.8041  | -2.4938 |
| 1438256_at   | Eif5a2        | eukaryotic translation initiation factor 5A2                                           | BB129302  | 4.4131 | 6.9094  | -2.4963 |
| 1440870_at   | Prdm16        | PR domain containing 16                                                                | BB356786  | 3.6941 | 6.2005  | -2.5064 |
| 1433667_at   | Lgi3          | leucine-rich repeat LGI family, member 3                                               | BB187947  | 3.9790 | 6.4898  | -2.5109 |
| 1417960_at   | Cpeb1         | cytoplasmic polyadenylation element binding protein 1                                  | NM_007755 | 3.5848 | 6.0996  | -2.5148 |
| 1460696_at   | BC026585      | cDNA sequence BC026585                                                                 | BC026585  | 5.5727 | 8.0886  | -2.5159 |
| 1424692_at   | 2810055F11Rik | RIKEN cDNA 2810055F11 gene                                                             | BC004753  | 5.0970 | 7.6138  | -2.5168 |
| 1431648_at   | Meiob         | meiosis specific with OB domains                                                       | AK015924  | 3.4868 | 6.0047  | -2.5179 |
| 1417889_at   | Apobec2       | apolipoprotein B mRNA editing enzyme, catalytic polypeptide 2                          | NM_009694 | 4.9392 | 7.4611  | -2.5220 |
| 1455299_at   | Vgll3         | vestigial like 3 (Drosophila)                                                          | BB011882  | 5.4108 | 7.9339  | -2.5231 |
| 1449046_a_at | Josd2         | Josephin domain containing 2                                                           | NM_025368 | 7.3417 | 9.8661  | -2.5244 |
| 1433587_at   | Rgmb          | RGM domain family, member B                                                            | BB612707  | 5.6354 | 8.1609  | -2.5255 |
| 1428512_at   | Bhlhb9        | basic helix-loop-helix domain containing, class B9                                     | AK012577  | 8.1440 | 10.6720 | -2.5280 |

|              |               |                                                                                   |           |        |         |         |
|--------------|---------------|-----------------------------------------------------------------------------------|-----------|--------|---------|---------|
| 1416505_at   | Nr4a1         | nuclear receptor subfamily 4, group A, member 1                                   | NM_010444 | 8.7930 | 11.3258 | -2.5328 |
| 1428622_at   |               |                                                                                   | AK014624  | 6.9937 | 9.5267  | -2.5330 |
| 1457680_a_at | Tmem69        | transmembrane protein 69                                                          | BB824992  | 5.0323 | 7.5689  | -2.5366 |
| 1423597_at   | Atp8a1        | ATPase, aminophospholipid transporter (APLT), class I, type 8A, member 1          | BB303874  | 6.1607 | 8.7127  | -2.5520 |
| 1430226_at   | Xlr4c         | X-linked lymphocyte-regulated 4C                                                  | AK013623  | 4.0740 | 6.6275  | -2.5536 |
| 1427198_at   | BC022960      | cDNA sequence BC022960                                                            | BC022960  | 6.6106 | 9.1647  | -2.5541 |
| 1437865_at   | Spata13       | spermatogenesis associated 13                                                     | AW546433  | 5.9357 | 8.4900  | -2.5544 |
| 1422620_s_at | Ppap2a        | phosphatidic acid phosphatase type 2A                                             | NM_008903 | 8.5129 | 11.0678 | -2.5549 |
| 1458702_at   | 2610316D01Rik | RIKEN cDNA 2610316D01 gene                                                        | AV170309  | 4.4791 | 7.0350  | -2.5559 |
| 1453093_at   | Rasgef1c      | RasGEF domain family, member 1C                                                   | AK018593  | 5.5578 | 8.1166  | -2.5588 |
| 1456343_at   | Slc35f1       | solute carrier family 35, member F1                                               | BB540579  | 3.8134 | 6.3729  | -2.5595 |
| 1440196_at   |               |                                                                                   | BB207611  | 4.7725 | 7.3328  | -2.5603 |
| 1440470_at   | Lrrc14        | leucine rich repeat containing 14                                                 | AA103376  | 4.4196 | 6.9909  | -2.5713 |
| 1418403_at   | Adam19        | a disintegrin and metallopeptidase domain 19 (meltrin beta)                       | NM_009616 | 3.9240 | 6.4961  | -2.5720 |
| 1422997_s_at |               |                                                                                   | NM_134188 | 5.5701 | 8.1457  | -2.5756 |
| 1426990_at   | Cubn          | cubilin (intrinsic factor-cobalamin receptor)                                     | AF197159  | 3.7762 | 6.3554  | -2.5792 |
| 1426524_at   | Gnpda2        | glucosamine-6-phosphate deaminase 2                                               | AK014950  | 7.1486 | 9.7328  | -2.5842 |
| 1443579_s_at |               |                                                                                   | AI957118  | 6.1696 | 8.7578  | -2.5882 |
| 1428541_at   | Fam115a       | family with sequence similarity 115, member A                                     | BE944524  | 3.0796 | 5.6689  | -2.5893 |
| 1434658_at   | 3110056O03Rik | RIKEN cDNA 3110056O03 gene                                                        | BB333439  | 7.3646 | 9.9545  | -2.5899 |
| 1438237_at   |               |                                                                                   | BM198106  | 6.0217 | 8.6118  | -2.5901 |
| 1421841_at   | Fgfr3         | fibroblast growth factor receptor 3                                               | NM_008010 | 6.8313 | 9.4216  | -2.5903 |
| 1425934_a_at | B4galt4       | UDP-Gal:betaGlcNAc beta 1,4-galactosyltransferase, polypeptide 4                  | AF158746  | 4.2404 | 6.8313  | -2.5909 |
| 1429146_at   | Svip          | small VCP/p97-interacting protein                                                 | BF011349  | 4.3366 | 6.9332  | -2.5966 |
| 1428915_at   | Sirt5         | sirtuin 5 (silent mating type information regulation 2 homolog) 5 (S. cerevisiae) | AK002609  | 6.9835 | 9.5803  | -2.5969 |
| 1420798_s_at |               |                                                                                   | NM_054072 | 3.5815 | 6.1807  | -2.5993 |
| 1449477_s_at | Slc2a10       | solute carrier family 2 (facilitated glucose transporter), member 10              | NM_130451 | 3.7878 | 6.3902  | -2.6024 |
| 1417028_a_at | Trim2         | tripartite motif-containing 2                                                     | BB283676  | 8.2552 | 10.8623 | -2.6071 |
| 1429663_at   | Katnal2       | katanin p60 subunit A-like 2                                                      | AK014074  | 4.4196 | 7.0284  | -2.6088 |
| 1423233_at   | Cebpd         | CCAAT/enhancer binding protein (C/EBP), delta                                     | BB831146  | 7.1280 | 9.7385  | -2.6105 |
| 1418451_at   | Gng2          | guanine nucleotide binding protein (G protein), gamma 2                           | BB522409  | 5.3231 | 7.9339  | -2.6108 |
| 1441964_at   | Qk            | quaking                                                                           | BB069531  | 5.4498 | 8.0618  | -2.6120 |
| 1452287_at   | Msi1          | Musashi homolog 1(Drosophila)                                                     | BB414973  | 3.0669 | 5.6803  | -2.6134 |
| 1449531_at   | Leprel2       | leprecan-like 2                                                                   | BC003726  | 5.3725 | 7.9874  | -2.6149 |
| 1424795_a_at | 1700001O22Rik | RIKEN cDNA 1700001O22 gene                                                        | BC023044  | 4.4866 | 7.1037  | -2.6171 |
| 1426315_a_at | 6330416G13Rik | RIKEN cDNA 6330416G13 gene                                                        | AV326978  | 5.0379 | 7.6559  | -2.6180 |
| 1455428_at   | Fam53b        | family with sequence similarity 53, member B                                      | BM248711  | 6.1559 | 8.7788  | -2.6229 |
| 1460602_at   | Dlc1          | deleted in liver cancer 1                                                         | BB768194  | 6.1969 | 8.8208  | -2.6239 |
| 1417185_at   | Ly6a          | lymphocyte antigen 6 complex, locus A                                             | BC002070  | 9.7058 | 12.3330 | -2.6273 |
| 1450429_at   | Capn6         | calpain 6                                                                         | AI747133  | 4.9157 | 7.5434  | -2.6277 |
| 1448876_at   | Evc           | Ellis van Creveld gene syndrome                                                   | NM_021292 | 5.3233 | 7.9515  | -2.6282 |
| 1451224_at   | Scamp5        | secretory carrier membrane protein 5                                              | BC018613  | 5.9930 | 8.6228  | -2.6298 |
| 1455610_at   | Synm          | synemin, intermediate filament protein                                            | BB457010  | 4.5745 | 7.2050  | -2.6305 |
| 1452514_a_at | Kit           | kit oncogene                                                                      | X65997    | 4.1439 | 6.7753  | -2.6314 |
| 1459860_x_at | Trim2         | tripartite motif-containing 2                                                     | BB466780  | 8.3941 | 11.0257 | -2.6316 |
| 1425500_x_at |               |                                                                                   | BC003207  | 5.2784 | 7.9141  | -2.6357 |
| 1450955_s_at | Sort1         | sortilin 1                                                                        | AV247637  | 4.5566 | 7.1934  | -2.6369 |
| 1422619_at   | Ppap2a        | phosphatidic acid phosphatase type 2A                                             | NM_008903 | 8.9274 | 11.5652 | -2.6378 |
| 1418263_at   | Ddx25         | DEAD (Asp-Glu-Ala-Asp) box polypeptide 25                                         | BC024852  | 4.3302 | 6.9682  | -2.6380 |
| 1427395_a_at | Aldh1a3       | aldehyde dehydrogenase family 1, subfamily A3                                     | BC026667  | 5.5255 | 8.1643  | -2.6388 |
| 1436395_at   | Card6         | caspase recruitment domain family, member 6                                       | BB766747  | 4.7901 | 7.4308  | -2.6407 |
| 1449632_s_at | Fkbp10        | FK506 binding protein 10                                                          | AI325255  | 7.3117 | 9.9530  | -2.6413 |
| 1418176_at   | Vdr           | vitamin D receptor                                                                | AV290079  | 5.8172 | 8.4589  | -2.6417 |
| 1426260_a_at |               |                                                                                   | D87867    | 7.7757 | 10.4188 | -2.6431 |
| 1424029_at   | Tspyl4        | TSPY-like 4                                                                       | BC017540  | 6.0270 | 8.6748  | -2.6478 |
| 1442753_at   | Tnfaip8       | tumor necrosis factor, alpha-induced protein 8                                    | BF321807  | 4.5792 | 7.2276  | -2.6484 |
| 1441636_at   | Sec14l5       | SEC14-like 5 (S. cerevisiae)                                                      | BB133117  | 5.2626 | 7.9141  | -2.6515 |
| 1451094_at   | Ggt7          | gamma-glutamyltransferase 7                                                       | BC005772  | 5.3414 | 7.9936  | -2.6522 |
| 1441228_at   | Apold1        | apolipoprotein L domain containing 1                                              | BM123813  | 5.7781 | 8.4341  | -2.6560 |
| 1418749_at   | Psd3          | pleckstrin and Sec7 domain containing 3                                           | NM_030263 | 7.1401 | 9.7964  | -2.6563 |
| 1425108_a_at | Smagp         | small cell adhesion glycoprotein                                                  | BC004728  | 5.6231 | 8.2802  | -2.6571 |
| 1451287_s_at | Aif1l         | allograft inflammatory factor 1-like                                              | BC024599  | 5.2262 | 7.8839  | -2.6577 |

|              |               |                                                                                        |           |        |         |         |
|--------------|---------------|----------------------------------------------------------------------------------------|-----------|--------|---------|---------|
| 1424567_at   | Tspan2        | tetraspanin 2                                                                          | BC007185  | 5.7035 | 8.3672  | -2.6637 |
| 1418021_at   | C4b           | complement component 4B (Chido blood group)                                            | NM_009780 | 6.0109 | 8.6884  | -2.6775 |
| 1455978_a_at | Matn2         | matrilin 2                                                                             | BB338441  | 6.6421 | 9.3209  | -2.6788 |
| 1460693_a_at | Col9a3        | collagen, type IX, alpha 3                                                             | BG074456  | 5.0107 | 7.6900  | -2.6793 |
| 1425464_at   | Gata6         | GATA binding protein 6                                                                 | BM214048  | 5.0348 | 7.7180  | -2.6831 |
| 1416579_a_at | Epcam         | epithelial cell adhesion molecule                                                      | BC005618  | 4.1354 | 6.8186  | -2.6832 |
| 1427733_a_at | Nfia          | nuclear factor I/A                                                                     | D90176    | 3.3933 | 6.0777  | -2.6844 |
| 1419820_at   | Pkhd1         | polycystic kidney and hepatic disease 1                                                | AI182499  | 2.8350 | 5.5196  | -2.6847 |
| 1426261_s_at |               |                                                                                        | D87867    | 5.9335 | 8.6228  | -2.6893 |
| 1417027_at   | Trim2         | tripartite motif-containing 2                                                          | BB283676  | 7.8881 | 10.5776 | -2.6895 |
| 1436355_at   | Fads6         | fatty acid desaturase domain family, member 6                                          | BE136429  | 4.2783 | 6.9682  | -2.6899 |
| 1450673_at   | Col9a2        | collagen, type IX, alpha 2                                                             | NM_007741 | 4.5145 | 7.2050  | -2.6905 |
| 1438106_at   |               |                                                                                        | AV336932  | 2.3979 | 5.0970  | -2.6991 |
| 1429735_at   | Qk            | quaking                                                                                | BB659256  | 6.2554 | 8.9548  | -2.6994 |
| 1448557_at   | Fam13c        | family with sequence similarity 13, member C                                           | NM_024244 | 4.0043 | 6.7042  | -2.6999 |
| 1460682_s_at |               |                                                                                        | BC024320  | 3.9024 | 6.6051  | -2.7027 |
| 1439909_at   | Zfp521        | zinc finger protein 521                                                                | BE133660  | 5.4771 | 8.1826  | -2.7055 |
| 1425530_a_at | Stx3          | syntaxin 3                                                                             | D29800    | 4.1351 | 6.8455  | -2.7104 |
| 1427996_at   | BC028528      | cDNA sequence BC028528                                                                 | BC028528  | 4.5672 | 7.2776  | -2.7104 |
| 1418753_at   | Gfpt2         | glutamine fructose-6-phosphate transaminase 2                                          | NM_013529 | 5.2685 | 7.9804  | -2.7119 |
| 1431213_a_at |               |                                                                                        | BG297038  | 4.9011 | 7.6138  | -2.7126 |
| 1426947_x_at | Col6a2        | collagen, type VI, alpha 2                                                             | BI455189  | 5.6454 | 8.3629  | -2.7175 |
| 1433924_at   | Peg3          | paternally expressed 3                                                                 | BM200248  | 3.2416 | 5.9590  | -2.7175 |
| 1445539_at   | Pde7b         | phosphodiesterase 7B                                                                   | BE687857  | 3.7825 | 6.5058  | -2.7233 |
| 1433720_s_at | Chchd10       | coiled-coil-helix-coiled-coil-helix domain containing 10                               | AI647775  | 8.4839 | 11.2075 | -2.7235 |
| 1454984_at   | Lifr          | leukemia inhibitory factor receptor                                                    | AV246615  | 4.1035 | 6.8313  | -2.7278 |
| 1429348_at   | Sema3c        | sema domain, immunoglobulin domain (Ig), short basic domain, secreted, (semaphorin) 3C | AK004119  | 6.2596 | 8.9881  | -2.7284 |
| 1431335_a_at | Wfdc1         | WAP four-disulfide core domain 1                                                       | AK018575  | 6.1556 | 8.8843  | -2.7287 |
| 1454903_at   | Ngfr          | nerve growth factor receptor (TNFR superfamily, member 16)                             | BB151515  | 7.6921 | 10.4211 | -2.7290 |
| 1436246_at   |               |                                                                                        | AI849504  | 4.7418 | 7.4774  | -2.7356 |
| 1429700_at   |               |                                                                                        | AV000681  | 3.9701 | 6.7079  | -2.7378 |
| 1424966_at   | Tmem40        | transmembrane protein 40                                                               | BC019416  | 5.0709 | 7.8087  | -2.7378 |
| 1451348_at   | Deptor        | DEP domain containing MTOR-interacting protein                                         | BC004774  | 6.4824 | 9.2213  | -2.7389 |
| 1457033_at   | Zscan4a       | zinc finger and SCAN domain containing 4A                                              | BM198753  | 5.1771 | 7.9298  | -2.7527 |
| 1425476_at   | Col4a5        | collagen, type IV, alpha 5                                                             | BM250666  | 9.0294 | 11.7850 | -2.7556 |
| 1418690_at   | Ptprz1        | protein tyrosine phosphatase, receptor type Z, polypeptide 1                           | NM_011219 | 2.7153 | 5.4771  | -2.7618 |
| 1442947_x_at |               |                                                                                        | BG069857  | 5.0584 | 7.8215  | -2.7631 |
| 1439260_a_at | Enpp3         | ectonucleotide pyrophosphatase/phosphodiesterase 3                                     | BB039510  | 3.3106 | 6.0777  | -2.7671 |
| 1423213_at   | Plxnc1        | plexin C1                                                                              | BB476707  | 3.4281 | 6.2005  | -2.7724 |
| 1434467_at   | Atcay         | ataxia, cerebellar, Cayman type homolog (human)                                        | BQ042885  | 3.9637 | 6.7398  | -2.7761 |
| 1417051_at   | Pcdh8         | protocadherin 8                                                                        | NM_021543 | 2.6565 | 5.4328  | -2.7763 |
| 1421855_at   | Fgl2          | fibrinogen-like protein 2                                                              | BF136544  | 3.5423 | 6.3197  | -2.7774 |
| 1430079_at   | 5033406O09Rik | RIKEN cDNA 5033406O09 gene                                                             | AK020272  | 3.7420 | 6.5262  | -2.7842 |
| 1439364_a_at | Mmp2          | matrix metalloproteinase 2                                                             | BF147716  | 9.9462 | 12.7327 | -2.7864 |
| 1429394_at   | A130010J15Rik | RIKEN cDNA A130010J15 gene                                                             | BB025778  | 5.3301 | 8.1167  | -2.7866 |
| 1443589_at   | DXErt242e     | DNA segment, Chr X, ERATO Doi 242, expressed                                           | C79245    | 3.2170 | 6.0047  | -2.7877 |
| 1419407_at   | Hc            | hemolytic complement                                                                   | NM_010406 | 3.9701 | 6.7621  | -2.7920 |
| 1456539_at   |               |                                                                                        | AV020412  | 4.3388 | 7.1383  | -2.7995 |
| 1434729_at   | Zc4h2         | zinc finger, C4H2 domain containing                                                    | BM120178  | 4.8229 | 7.6236  | -2.8007 |
| 1433855_at   | Abat          | 4-aminobutyrate aminotransferase                                                       | BF462185  | 4.2099 | 7.0173  | -2.8074 |
| 1434466_at   | Atcay         | ataxia, cerebellar, Cayman type homolog (human)                                        | BQ042885  | 3.4098 | 6.2200  | -2.8101 |
| 1456097_a_at | Itgb3bp       | integrin beta 3 binding protein (beta5-ondorexin)                                      | BB830191  | 6.5190 | 9.3306  | -2.8117 |
| 1448737_at   | Tspan7        | tetraspanin 7                                                                          | AF052492  | 6.9094 | 9.7220  | -2.8126 |
| 1453593_at   | Vgll3         | vestigial like 3 (Drosophila)                                                          | BG066866  | 5.6198 | 8.4341  | -2.8143 |
| 1433043_at   | Vcan          | versican                                                                               | AK017328  | 3.3086 | 6.1258  | -2.8172 |
| 1455172_at   | AU020094      | expressed sequence AU020094                                                            | BG069639  | 4.3134 | 7.1356  | -2.8222 |
| 1436735_at   | Nsun3         | NOL1/NOP2/Sun domain family member 3                                                   | BB769111  | 3.9833 | 6.8057  | -2.8225 |
| 1430596_s_at | Vgll3         | vestigial like 3 (Drosophila)                                                          | BG066866  | 5.3151 | 8.1406  | -2.8255 |
| 1436173_at   | Dlc1          | deleted in liver cancer 1                                                              | BB768194  | 5.7003 | 8.5270  | -2.8267 |

|              |               |                                                           |           |         |         |         |
|--------------|---------------|-----------------------------------------------------------|-----------|---------|---------|---------|
| 1419703_at   | Col5a3        | collagen, type V, alpha 3                                 | NM_016919 | 7.0748  | 9.9042  | -2.8294 |
| 1434889_at   | Plekha7       | pleckstrin homology domain containing, family A member 7  | BI905111  | 4.6148  | 7.4447  | -2.8298 |
| 1439618_at   | Pde10a        | phosphodiesterase 10A                                     | AI448308  | 2.8800  | 5.7139  | -2.8339 |
| 1429861_at   | Pcdh9         | protocadherin 9                                           | BQ177394  | 5.0970  | 7.9339  | -2.8370 |
| 1455833_at   | Afap1l2       | actin filament associated protein 1-like 2                | BG068103  | 5.7129  | 8.5504  | -2.8375 |
| 1450064_at   | Fmn2          | formin 2                                                  | BM228488  | 3.6553  | 6.5058  | -2.8505 |
| 1440527_at   |               |                                                           | BI440542  | 4.7432  | 7.5990  | -2.8558 |
| 1435670_at   | Tfap2b        | transcription factor AP-2 beta                            | AV237028  | 3.7032  | 6.5605  | -2.8573 |
| 1435272_at   | Itpkb         | inositol 1,4,5-trisphosphate 3-kinase B                   | BE196957  | 4.2356  | 7.0932  | -2.8576 |
| 1421943_at   | Tgfa          | transforming growth factor alpha                          | M92420    | 7.1387  | 9.9965  | -2.8578 |
| 1421145_at   | Slc26a2       | solute carrier family 26 (sulfate transporter), member 2  | NM_007885 | 2.9724  | 5.8382  | -2.8657 |
| 1424840_at   | Rbks          | ribokinase                                                | BC023339  | 4.6597  | 7.5278  | -2.8682 |
| 1438325_at   | Mecom         | MDS1 and EVI1 complex locus                               | AI647591  | 4.0467  | 6.9189  | -2.8723 |
| 1447927_at   |               |                                                           | BG092512  | 5.5812  | 8.4548  | -2.8736 |
| 1439619_at   | Tcf12         | transcription factor 12                                   | BG143445  | 4.1948  | 7.0714  | -2.8766 |
| 1418941_at   | Pcdhb22       | protocadherin beta 22                                     | NM_053147 | 3.5264  | 6.4073  | -2.8809 |
| 1421525_a_at | Naip5         | NLR family, apoptosis inhibitory protein 5                | NM_010870 | 3.5395  | 6.4212  | -2.8817 |
| 1433438_x_at | Mela          | melanoma antigen                                          | BB794642  | 7.3757  | 10.2674 | -2.8917 |
| 1429265_a_at | Rnf130        | ring finger protein 130                                   | AK011088  | 7.3898  | 10.2818 | -2.8920 |
| 1429628_at   | 6330407J23Rik | RIKEN cDNA 6330407J23 gene                                | AK012378  | 4.0372  | 6.9332  | -2.8960 |
| 1436663_at   | AI846148      | expressed sequence AI846148                               | BB521470  | 5.0107  | 7.9081  | -2.8974 |
| 1443960_at   | Asrgl1        | asparaginase like 1                                       | BQ175377  | 4.1086  | 7.0061  | -2.8975 |
| 1440774_x_at | Wee2          | WEE1 homolog 2 (S. pombe)                                 | BB061859  | 3.2416  | 6.1404  | -2.8988 |
| 1427883_a_at | Col3a1        | collagen, type III, alpha 1                               | AW550625  | 9.9842  | 12.8864 | -2.9022 |
| 1430681_at   | Cryl1         | crystallin, lambda 1                                      | AI482548  | 5.4452  | 8.3497  | -2.9044 |
| 1452980_at   | 2810468N07Rik | RIKEN cDNA 2810468N07 gene                                | AK013390  | 3.9742  | 6.8811  | -2.9069 |
| 1453855_at   | Mxra7         | matrix-remodelling associated 7                           | BG295762  | 5.9357  | 8.8430  | -2.9073 |
| 1429888_a_at | Hspb2         | heat shock protein 2                                      | AK012780  | 6.0340  | 8.9422  | -2.9082 |
| 1431834_a_at | Emilin1       | elastin microfibril interfacier 1                         | AK020015  | 5.7265  | 8.6386  | -2.9121 |
| 1435359_at   | Mtss1l        | metastasis suppressor 1-like                              | BB154954  | 5.5488  | 8.4630  | -2.9142 |
| 1440813_s_at | Plxnb3        | plexin B3                                                 | AI451018  | 6.2628  | 9.1796  | -2.9168 |
| 1434150_a_at |               |                                                           | AV171622  | 3.7364  | 6.6541  | -2.9176 |
| 1448551_a_at | Trim2         | tripartite motif-containing 2                             | BB283676  | 6.4735  | 9.3913  | -2.9179 |
| 1416136_at   | Mmp2          | matrix metalloproteinase 2                                | NM_008610 | 9.6405  | 12.5626 | -2.9221 |
| 1426018_a_at | Sox6          | SRY-box containing gene 6                                 | D61689    | 4.2459  | 7.1687  | -2.9228 |
| 1444837_at   |               |                                                           | AV260557  | 3.1525  | 6.0777  | -2.9252 |
| 1425869_a_at | Psen2         | presenilin 2                                              | BC010403  | 5.7155  | 8.6482  | -2.9327 |
| 1452823_at   | Gstk1         | glutathione S-transferase kappa 1                         | AK002661  | 6.5838  | 9.5168  | -2.9330 |
| 1455892_x_at |               |                                                           | BB794742  | 10.2359 | 13.1701 | -2.9342 |
| 1423895_a_at | Celf2         | CUGBP, Elav-like family member 2                          | BB644164  | 6.1084  | 9.0486  | -2.9402 |
| 1437408_at   | Gpr126        | G protein-coupled receptor 126                            | BB812574  | 5.7231  | 8.6673  | -2.9441 |
| 1455628_at   | Epb4.1I4b     | erythrocyte protein band 4.1-like 4b                      | BB317849  | 5.1625  | 8.1114  | -2.9489 |
| 1438142_s_at | Cdhr4         | cadherin-related family member 4                          | C87564    | 4.7883  | 7.7384  | -2.9501 |
| 1451058_at   | Mcts2         | malignant T cell amplified sequence 2                     | AV017653  | 5.2514  | 8.2023  | -2.9509 |
| 1424824_at   | Slain1        | SLAIN motif family, member 1                              | BB704967  | 2.5992  | 5.5508  | -2.9516 |
| 1421571_a_at |               |                                                           | NM_010741 | 8.1103  | 11.0666 | -2.9563 |
| 1436150_at   | 2310028H24Rik | RIKEN cDNA 2310028H24 gene                                | BB391675  | 4.6713  | 7.6309  | -2.9596 |
| 1421112_at   | Nkx2-2        | NK2 transcription factor related, locus 2 (Drosophila)    | NM_010919 | 4.0878  | 7.0503  | -2.9625 |
| 1439602_at   | Fign          | fidgetin                                                  | BB344218  | 3.7824  | 6.7488  | -2.9664 |
| 1434497_at   | 4933431E20Rik | RIKEN cDNA 4933431E20 gene                                | BB754142  | 4.4177  | 7.3855  | -2.9678 |
| 1429246_a_at | Anxa6         | annexin A6                                                | AK013026  | 4.7207  | 7.6903  | -2.9696 |
| 1426523_a_at | Gnpda2        | glucosamine-6-phosphate deaminase 2                       | AK014950  | 6.4242  | 9.3956  | -2.9715 |
| 1418712_at   | Cdc42ep5      | CDC42 effector protein (Rho GTPase binding) 5             | NM_021454 | 6.0446  | 9.0165  | -2.9719 |
| 1423443_at   | Slc4a8        | solute carrier family 4 (anion exchanger), member 8       | BB183341  | 5.4443  | 8.4173  | -2.9730 |
| 1455163_at   | Guf1          | GUF1 GTPase homolog (S. cerevisiae)                       | AV351082  | 4.4791  | 7.4557  | -2.9766 |
| 1448249_at   | Gpd1          | glycerol-3-phosphate dehydrogenase 1 (soluble)            | BC019391  | 6.0831  | 9.0608  | -2.9777 |
| 1434959_at   | Dhh           | desert hedgehog                                           | AV367068  | 6.4990  | 9.4795  | -2.9805 |
| 1455106_a_at | Ckb           | creatine kinase, brain                                    | BG967663  | 9.3254  | 12.3083 | -2.9829 |
| 1454656_at   | Spata13       | spermatogenesis associated 13                             | AV271736  | 7.6171  | 10.6026 | -2.9855 |
| 1419442_at   | Matn2         | matrilin 2                                                | BC005429  | 6.5881  | 9.5753  | -2.9872 |
| 1417701_at   | Ppp1r14c      | protein phosphatase 1, regulatory (inhibitor) subunit 14c | NM_133485 | 6.4409  | 9.4328  | -2.9919 |
| 1418464_at   | Matn4         | matrilin 4                                                | NM_013592 | 5.5752  | 8.5690  | -2.9938 |

|              |               |                                                                                 |           |        |         |         |
|--------------|---------------|---------------------------------------------------------------------------------|-----------|--------|---------|---------|
| 1437983_at   | Sall1         | sal-like 1 (Drosophila)                                                         | BB739342  | 4.0343 | 7.0284  | -2.9941 |
| 1435510_at   | Ppm1h         | protein phosphatase 1H (PP2C domain containing)                                 | BB283101  | 5.2880 | 8.2848  | -2.9968 |
| 1441075_at   | Nostrin       | nitric oxide synthase trafficker                                                | AW541389  | 3.8808 | 6.8811  | -3.0003 |
| 1433944_at   |               |                                                                                 | AV256030  | 4.6221 | 7.6236  | -3.0014 |
| 1425176_at   | C1ql3         | C1q-like 3                                                                      | BB768838  | 6.9195 | 9.9241  | -3.0046 |
| 1450988_at   |               |                                                                                 | BB751088  | 4.6182 | 7.6236  | -3.0054 |
| 1418374_at   | Fxyd3         | FXYD domain-containing ion transport regulator 3                                | NM_008557 | 4.6590 | 7.6668  | -3.0079 |
| 1454966_at   | Itga8         | integrin alpha 8                                                                | BQ175493  | 4.5835 | 7.5915  | -3.0080 |
| 1418750_at   | Plxnb3        | plexin B3                                                                       | NM_019587 | 5.3511 | 8.3629  | -3.0117 |
| 1456591_x_at | Akap3         | A kinase (PRKA) anchor protein 3                                                | AV255496  | 3.3245 | 6.3376  | -3.0131 |
| 1418175_at   | Vdr           | vitamin D receptor                                                              | AV290079  | 5.3570 | 8.3716  | -3.0146 |
| 1456981_at   | Tmc7          | transmembrane channel-like gene family 7                                        | BB428982  | 4.8719 | 7.8865  | -3.0146 |
| 1450069_a_at | Celf2         | CUGBP, Elav-like family member 2                                                | BB667096  | 6.2436 | 9.2610  | -3.0174 |
| 1456389_at   | Zeb2          | zinc finger E-box binding homeobox 2                                            | BB244754  | 5.5091 | 8.5348  | -3.0257 |
| 1444602_at   | Ophn1         | oligophrenin 1                                                                  | BE136101  | 2.5242 | 5.5508  | -3.0265 |
| 1423266_at   | 2810405K02Rik | RIKEN cDNA 2810405K02 gene                                                      | AI836168  | 5.5399 | 8.5694  | -3.0295 |
| 1435123_at   | Efr3b         | EFR3 homolog B (S. cerevisiae)                                                  | BB795377  | 4.4150 | 7.4447  | -3.0297 |
| 1426621_a_at | Ppp2r2b       | protein phosphatase 2 (formerly 2A), regulatory subunit B (PR 52), beta isoform | BB560759  | 3.3246 | 6.3554  | -3.0308 |
| 1435678_at   | 2610017I09Rik | RIKEN cDNA 2610017I09 gene                                                      | AW045679  | 4.6127 | 7.6454  | -3.0326 |
| 1439526_at   |               |                                                                                 | AV375160  | 5.2602 | 8.3047  | -3.0446 |
| 1423854_a_at | Rasl11b       | RAS-like, family 11, member B                                                   | BC008101  | 6.5424 | 9.5897  | -3.0473 |
| 1427101_at   | Metrn         | meteorin, glial cell differentiation regulator                                  | BE947704  | 4.5107 | 7.5587  | -3.0480 |
| 1459720_x_at |               |                                                                                 | BB796715  | 5.0030 | 8.0510  | -3.0480 |
| 1427795_s_at |               |                                                                                 | BC021394  | 3.6732 | 6.7217  | -3.0485 |
| 1436990_s_at |               |                                                                                 | AA038464  | 8.4967 | 11.5481 | -3.0514 |
| 1427798_x_at |               |                                                                                 | BF580235  | 4.9067 | 7.9590  | -3.0523 |
| 1425475_at   | Col4a5        | collagen, type IV, alpha 5                                                      | BM250666  | 7.5935 | 10.6527 | -3.0592 |
| 1416710_at   | Tmem35        | transmembrane protein 35                                                        | NM_026239 | 3.4443 | 6.5058  | -3.0616 |
| 1423865_at   | Slc44a1       | solute carrier family 44, member 1                                              | BC025941  | 6.0763 | 9.1384  | -3.0621 |
| 1440311_at   | Sorbs1        | sorbin and SH3 domain containing 1                                              | BB259710  | 3.4758 | 6.5424  | -3.0666 |
| 1429896_at   | 5830408B19Rik | RIKEN cDNA 5830408B19 gene                                                      | BE135996  | 3.7968 | 6.8688  | -3.0720 |
| 1455266_at   | Kif5c         | kinesin family member 5C                                                        | BB698320  | 5.4122 | 8.4900  | -3.0778 |
| 1434069_at   | Prex1         | phosphatidylinositol-3,4,5-trisphosphate-dependent Rac exchange factor 1        | BB794978  | 5.0259 | 8.1061  | -3.0802 |
| 1424713_at   | Calml4        | calmodulin-like 4                                                               | AY061807  | 3.6123 | 6.6941  | -3.0818 |
| 1433536_at   | Lrp11         | low density lipoprotein receptor-related protein 11                             | BB435348  | 6.0526 | 9.1358  | -3.0832 |
| 1441579_at   | Dmrta1        | doublesex and mab-3 related transcription factor like family A1                 | BB461344  | 3.3040 | 6.3902  | -3.0862 |
| 1419523_at   | Cyp3a13       | cytochrome P450, family 3, subfamily a, polypeptide 13                          | NM_007819 | 3.5815 | 6.6698  | -3.0883 |
| 1422868_s_at | Gda           | guanine deaminase                                                               | NM_010266 | 3.3682 | 6.4574  | -3.0892 |
| 1427354_at   | Hoxa4         | homeobox A4                                                                     | AV135424  | 3.4989 | 6.5881  | -3.0892 |
| 1450322_s_at |               |                                                                                 | NM_011409 | 4.0295 | 7.1193  | -3.0898 |
| 1443882_at   | Slc26a2       | solute carrier family 26 (sulfate transporter), member 2                        | BI150812  | 7.4055 | 10.4962 | -3.0907 |
| 1432517_a_at | Nnmt          | nicotinamide N-methyltransferase                                                | AK006371  | 5.0544 | 8.1457  | -3.0913 |
| 1460553_at   | 1700025K23Rik | RIKEN cDNA 1700025K23 gene                                                      | BF466605  | 4.4573 | 7.5511  | -3.0938 |
| 1422159_at   | Ppef2         | protein phosphatase, EF hand calcium-binding domain 2                           | BC027049  | 4.8132 | 7.9081  | -3.0950 |
| 1453487_at   | Dhdh          | dihydrodiol dehydrogenase (dimeric)                                             | AK005050  | 3.5815 | 6.6801  | -3.0986 |
| 1452840_at   | 1500009L16Rik | RIKEN cDNA 1500009L16 gene                                                      | AV216011  | 3.4976 | 6.6030  | -3.1054 |
| 1438202_at   | Fam109b       | family with sequence similarity 109, member B                                   | AV295563  | 3.3779 | 6.4898  | -3.1120 |
| 1453514_at   | Gpm6b         | glycoprotein m6b                                                                | AK020224  | 3.5815 | 6.6993  | -3.1178 |
| 1417251_at   | Palmd         | palmdelphin                                                                     | NM_023245 | 3.4062 | 6.5268  | -3.1206 |
| 1448665_at   | Dmd           | dystrophin, muscular dystrophy                                                  | NM_007868 | 3.9701 | 7.0932  | -3.1231 |
| 1437756_at   | Gimap9        | GTPase, IMAP family member 9                                                    | BF682515  | 3.5179 | 6.6421  | -3.1241 |
| 1434580_at   | Enpp4         | ectonucleotide pyrophosphatase/phosphodiesterase 4                              | AV280361  | 6.1561 | 9.2874  | -3.1313 |
| 1427100_at   | Metrn         | meteorin, glial cell differentiation regulator                                  | BE947704  | 9.4098 | 12.5517 | -3.1419 |
| 1419434_at   | Slc2a10       | solute carrier family 2 (facilitated glucose transporter), member 10            | NM_130451 | 3.2315 | 6.3776  | -3.1462 |
| 1424808_at   | Lama4         | laminin, alpha 4                                                                | BB053010  | 3.4107 | 6.5578  | -3.1471 |
| 1448590_at   | Col6a1        | collagen, type VI, alpha 1                                                      | NM_009933 | 8.2709 | 11.4238 | -3.1529 |
| 1455177_at   | Ahi1          | Abelson helper integration site 1                                               | BQ175532  | 5.2958 | 8.4507  | -3.1549 |
| 1424379_at   | Car11         | carbonic anhydrase 11                                                           | BC019393  | 4.7794 | 7.9398  | -3.1604 |

|              |               |                                                                                                              |           |        |         |         |
|--------------|---------------|--------------------------------------------------------------------------------------------------------------|-----------|--------|---------|---------|
| 1451154_a_at | Celf2         | CUGBP, Elav-like family member 2                                                                             | BB644164  | 6.7940 | 9.9603  | -3.1663 |
| 1436845_at   | Axin2         | axin2                                                                                                        | BB398993  | 5.1690 | 8.3378  | -3.1688 |
| 1425597_a_at | Qk            | quaking                                                                                                      | AW060288  | 3.4539 | 6.6273  | -3.1734 |
| 1451620_at   | C1ql3         | C1q-like 3                                                                                                   | BB768838  | 7.4774 | 10.6578 | -3.1804 |
| 1448507_at   | Efhd1         | EF hand domain containing 1                                                                                  | BC019531  | 4.9673 | 8.1508  | -3.1835 |
| 1444086_at   | Nckap5        | NCK-associated protein 5                                                                                     | BB536333  | 3.1863 | 6.3729  | -3.1866 |
| 1440231_at   | Mtap9         | microtubule-associated protein 9                                                                             | BM205212  | 5.0107 | 8.2023  | -3.1916 |
| 1439251_at   | Idua          | iduronidase, alpha-L-                                                                                        | BI133445  | 6.0929 | 9.2874  | -3.1945 |
| 1431980_a_at | As3mt         | arsenic (+3 oxidation state) methyltransferase                                                               | AK009814  | 3.4443 | 6.6421  | -3.1978 |
| 1457701_at   | Tmem136       | transmembrane protein 136                                                                                    | BB457336  | 3.5193 | 6.7217  | -3.2023 |
| 1448465_at   | Nipsnap1      | 4-nitrophenylphosphatase domain and non-neuronal SNAP25-like protein homolog 1 (C. elegans)                  | BC010837  | 5.8442 | 9.0513  | -3.2071 |
| 1459546_s_at | Enpp1         | ectonucleotide pyrophosphatase/phosphodiesterase 1                                                           | C76301    | 4.8172 | 8.0272  | -3.2100 |
| 1435705_at   | Zscan18       | zinc finger and SCAN domain containing 18                                                                    | BB305660  | 3.0872 | 6.3015  | -3.2143 |
| 1438324_at   | 9330182L06Rik | RIKEN cDNA 9330182L06 gene                                                                                   | AW550882  | 2.8307 | 6.0489  | -3.2183 |
| 1450063_at   | Fmn2          | formin 2                                                                                                     | BM228488  | 4.0060 | 7.2276  | -3.2216 |
| 1455343_at   | Plekha7       | pleckstrin homology domain containing, family A member 7                                                     | BF159528  | 3.6732 | 6.8973  | -3.2242 |
| 1437072_at   | Arhgap25      | Rho GTPase activating protein 25                                                                             | BM241218  | 3.7684 | 7.0061  | -3.2377 |
| 1436309_at   | Neto2         | neuropilin (NRP) and tolloid (TLL)-like 2                                                                    | BB125651  | 4.7109 | 7.9515  | -3.2406 |
| 1417168_a_at | Usp2          | ubiquitin specific peptidase 2                                                                               | AI553394  | 4.5972 | 7.8384  | -3.2412 |
| 1455101_at   | Phactr2       | phosphatase and actin regulator 2                                                                            | BE631955  | 2.7149 | 5.9590  | -3.2441 |
| 1447806_s_at | Srpk3         | serine/arginine-rich protein specific kinase 3                                                               | BB036235  | 4.2333 | 7.4774  | -3.2441 |
| 1448765_at   | Fyn           | Fyn proto-oncogene                                                                                           | NM_008054 | 6.3703 | 9.6163  | -3.2460 |
| 1436098_at   | Bche          | butyrylcholinesterase                                                                                        | BB667452  | 4.6659 | 7.9141  | -3.2482 |
| 1431326_a_at | Tmod2         | tropomodulin 2                                                                                               | AK017072  | 4.7446 | 7.9936  | -3.2490 |
| 1439622_at   | Rassf4        | Ras association (RalGDS/AF-6) domain family member 4                                                         | AV291679  | 4.5626 | 7.8151  | -3.2526 |
| 1455337_at   | Fgd4          | FYVE, RhoGEF and PH domain containing 4                                                                      | BQ175875  | 3.4740 | 6.7306  | -3.2566 |
| 1435256_at   | Clip3         | CAP-GLY domain containing linker protein 3                                                                   | BQ174720  | 4.9839 | 8.2460  | -3.2622 |
| 1425538_x_at | Ceacam1       | carcinoembryonic antigen-related cell adhesion molecule 1                                                    | BC016891  | 3.4051 | 6.6696  | -3.2644 |
| 1425502_x_at |               |                                                                                                              | BC003207  | 5.5812 | 8.8566  | -3.2753 |
| 1419108_at   | Ophn1         | oligophrenin 1                                                                                               | BI134110  | 4.8037 | 8.0833  | -3.2795 |
| 1448945_at   | Plip          | plasma membrane proteolipid                                                                                  | BC024534  | 5.8126 | 9.0959  | -3.2833 |
| 1416716_at   | Efs           | embryonal Fyn-associated substrate                                                                           | NM_010112 | 6.2392 | 9.5279  | -3.2887 |
| 1428808_at   | Prickle2      | prickle homolog 2 (Drosophila)                                                                               | BQ177191  | 4.3493 | 7.6440  | -3.2947 |
| 1428157_at   | Gng2          | guanine nucleotide binding protein (G protein), gamma 2                                                      | AV021455  | 2.9860 | 6.2831  | -3.2971 |
| 1418713_at   | Pcbd1         | pterin 4 alpha carbinolamine dehydratase/dimerization cofactor of hepatocyte nuclear factor 1 alpha (TCF1) 1 | NM_025273 | 6.6423 | 9.9404  | -3.2981 |
| 1449591_at   | Casp4         | caspase 4, apoptosis-related cysteine peptidase                                                              | NM_007609 | 5.8632 | 9.1621  | -3.2989 |
| 1451626_x_at |               |                                                                                                              | U58494    | 7.8371 | 11.1384 | -3.3012 |
| 1456087_at   | Nfia          | nuclear factor I/A                                                                                           | BB089547  | 5.5554 | 8.8628  | -3.3074 |
| 1451322_at   | Cmb1          | carboxymethylglutaminase-like (Pseudomonas)                                                                  | BC024580  | 5.9729 | 9.2805  | -3.3076 |
| 1422510_at   | Ctdspl        | CTD (carboxy-terminal domain, RNA polymerase II, polypeptide A) small                                        | NM_133710 | 5.4891 | 8.8070  | -3.3178 |
| 1423340_at   | Tfap2b        | transcription factor AP-2 beta                                                                               | AV334599  | 3.3762 | 6.6941  | -3.3179 |
| 1455127_at   | Xkr5          | X Kell blood group precursor-related family, member 5                                                        | AV293493  | 3.7529 | 7.0719  | -3.3190 |
| 1419593_at   | Greb1         | gene regulated by estrogen in breast cancer protein                                                          | NM_015764 | 4.8397 | 8.1609  | -3.3212 |
| 1420565_at   | Hoxa1         | homeobox A1                                                                                                  | NM_010449 | 4.3885 | 7.7111  | -3.3226 |
| 1436582_at   | Zdhhc15       | zinc finger, DHHC domain containing 15                                                                       | BQ176228  | 4.0965 | 7.4196  | -3.3231 |
| 1430896_s_at | Nudt7         | nudix (nucleoside diphosphate linked moiety X)-type motif 7                                                  | AK008824  | 4.4728 | 7.8001  | -3.3273 |
| 1455845_at   | Wscd1         | WSC domain containing 1                                                                                      | AV099154  | 4.3609 | 7.6903  | -3.3294 |
| 1425894_at   | Mrgprf        | MAS-related GPR, member F                                                                                    | BC019711  | 4.7820 | 8.1120  | -3.3300 |
| 1444260_at   |               |                                                                                                              | BF661746  | 3.1259 | 6.4564  | -3.3306 |
| 1441957_x_at | 2410076I21Rik | RIKEN cDNA 2410076I21 gene                                                                                   | AV216663  | 3.0227 | 6.3554  | -3.3326 |
| 1456665_at   | Eya4          | eyes absent 4 homolog (Drosophila)                                                                           | BB476944  | 3.9919 | 7.3318  | -3.3399 |
| 1455257_at   | Itgb3         | integrin beta 3                                                                                              | AV352983  | 4.7901 | 8.1333  | -3.3432 |
| 1416846_a_at | Pdzn3         | PDZ domain containing RING finger 3                                                                          | NM_018884 | 6.1370 | 9.4836  | -3.3466 |
| 1423362_at   | Sort1         | sortilin 1                                                                                                   | AV247637  | 5.9422 | 9.2897  | -3.3475 |
| 1435363_at   | Plekhg1       | pleckstrin homology domain containing, family G (with RhoGef domain) member 1                                | BG073502  | 4.2966 | 7.6454  | -3.3487 |

|              |               |                                                                                             |           |        |         |         |
|--------------|---------------|---------------------------------------------------------------------------------------------|-----------|--------|---------|---------|
| 1439713_at   | Itga1         | integrin alpha 1                                                                            | AV372589  | 5.1786 | 8.5387  | -3.3601 |
| 1426208_x_at | Plagl1        | pleiomorphic adenoma gene-like 1                                                            | AF147785  | 6.6617 | 10.0277 | -3.3661 |
| 1448475_at   | Olfml3        | olfactomedin-like 3                                                                         | NM_133859 | 5.4425 | 8.8102  | -3.3677 |
| 1450315_at   | Vmn1r148      | vomer nasal 1 receptor 148                                                                  | NM_030736 | 5.5630 | 8.9314  | -3.3684 |
| 1444466_at   | Ncald         | neurocalcin delta                                                                           | BB433324  | 4.3541 | 7.7259  | -3.3718 |
| 1441953_at   | Stox2         | storkhead box 2                                                                             | BB003572  | 4.7284 | 8.1017  | -3.3733 |
| 1427072_at   |               |                                                                                             | BM119481  | 5.6019 | 8.9874  | -3.3855 |
| 1454728_s_at | Atp8a1        | ATPase, aminophospholipid transporter (APLT), class I, type 8A, member 1                    | AW610650  | 5.2439 | 8.6382  | -3.3943 |
| 1437698_at   | Myo5b         | myosin VB                                                                                   | AV370579  | 4.6296 | 8.0382  | -3.4086 |
| 1421374_a_at | Fxyd1         | FXD domain-containing ion transport regulator 1                                             | NM_019503 | 6.0578 | 9.4667  | -3.4088 |
| 1417569_at   | Ncald         | neurocalcin delta                                                                           | BG071381  | 6.7665 | 10.1831 | -3.4165 |
| 1426263_at   | Cadm4         | cell adhesion molecule 4                                                                    | AY059394  | 6.6263 | 10.0443 | -3.4180 |
| 1442371_at   | Lmbr1         | limb region 1                                                                               | BM898643  | 4.2333 | 7.6525  | -3.4192 |
| 1422869_at   | Mertk         | c-mer proto-oncogene tyrosine kinase                                                        | NM_008587 | 5.3414 | 8.7611  | -3.4197 |
| 1428447_at   | Tmem14a       | transmembrane protein 14A                                                                   | AK017734  | 4.2333 | 7.6572  | -3.4239 |
| 1457423_at   | Nalcn         | sodium leak channel, non-selective                                                          | AI849508  | 4.5592 | 7.9880  | -3.4288 |
| 1427195_at   | Slc26a2       | solute carrier family 26 (sulfate transporter), member 2                                    | W91587    | 6.9450 | 10.3738 | -3.4289 |
| 1422782_s_at | Tlr3          | toll-like receptor 3                                                                        | NM_126166 | 4.4783 | 7.9081  | -3.4299 |
| 1417600_at   | Slc15a2       | solute carrier family 15 (H+/peptide transporter), member 2                                 | NM_021301 | 4.2931 | 7.7248  | -3.4317 |
| 1419551_s_at | Stk39         | serine/threonine kinase 39                                                                  | BG919998  | 5.5221 | 8.9577  | -3.4356 |
| 1419124_at   | Mfsd6         | major facilitator superfamily domain containing 6                                           | NM_133829 | 3.3762 | 6.8186  | -3.4424 |
| 1429088_at   | Lbh           | limb-bud and heart                                                                          | AK007400  | 6.0966 | 9.5409  | -3.4442 |
| 1435158_at   | Rbm12b1       | RNA binding motif protein 12 B1                                                             | BB796313  | 3.5117 | 6.9566  | -3.4450 |
| 1448083_at   | Nalcn         | sodium leak channel, non-selective                                                          | BE861826  | 3.7307 | 7.1886  | -3.4579 |
| 1448669_at   | Dkk3          | dickkopf homolog 3 (Xenopus laevis)                                                         | AK004853  | 4.9033 | 8.3629  | -3.4595 |
| 1438982_s_at | Flywch2       | FLYWCH family member 2                                                                      | BB251185  | 3.4959 | 6.9566  | -3.4607 |
| 1443934_at   | 9230110C19Rik | RIKEN cDNA 9230110C19 gene                                                                  | AI467525  | 4.3995 | 7.8634  | -3.4639 |
| 1423510_at   | Iapp          | islet amyloid polypeptide                                                                   | BM569571  | 3.8660 | 7.3301  | -3.4641 |
| 1438288_x_at | 1110059G02Rik | RIKEN cDNA 1110059G02 gene                                                                  | BB766817  | 3.9361 | 7.4027  | -3.4666 |
| 1417923_at   | Pak3          | p21 protein (Cdc42/Rac)-activated kinase 3                                                  | BQ174935  | 4.8719 | 8.3423  | -3.4704 |
| 1455960_at   | Megf9         | multiple EGF-like-domains 9                                                                 | BB483642  | 4.4196 | 7.8900  | -3.4704 |
| 1460360_at   | Asrgl1        | asparaginase like 1                                                                         | AU040643  | 6.4574 | 9.9281  | -3.4707 |
| 1455251_at   | Itga1         | integrin alpha 1                                                                            | AV071536  | 6.3805 | 9.8583  | -3.4778 |
| 1424464_s_at | Mfsd6         | major facilitator superfamily domain containing 6                                           | BF225441  | 4.6051 | 8.0956  | -3.4905 |
| 1435336_at   | Celsr2        | cadherin, EGF LAG seven-pass G-type receptor 2 (flamingo homolog, Drosophila)               | AW553336  | 4.3588 | 7.8573  | -3.4985 |
| 1456954_at   | Kcna6         | potassium voltage-gated channel, shaker-related, subfamily, member 6                        | BM119753  | 4.7207 | 8.2218  | -3.5011 |
| 1438020_at   | Hapln1        | hyaluronan and proteoglycan link protein 1                                                  | BB036951  | 2.5992 | 6.1091  | -3.5100 |
| 1424396_a_at | Asrgl1        | asparaginase like 1                                                                         | AU040643  | 7.0574 | 10.5707 | -3.5133 |
| 1451629_at   | Lbh           | limb-bud and heart                                                                          | BC026827  | 8.4525 | 11.9787 | -3.5262 |
| 1428852_at   | Dock3         | dedicator of cyto-kinesis 3                                                                 | AK018140  | 3.8342 | 7.3626  | -3.5284 |
| 1460273_a_at | Naip2         | NLR family, apoptosis inhibitory protein 2                                                  | NM_010872 | 3.9137 | 7.4447  | -3.5310 |
| 1454674_at   | Fez1          | fasciculation and elongation protein zeta 1 (zygin I)                                       | AU067669  | 6.5681 | 10.1014 | -3.5333 |
| 1430353_at   | Glis3         | GLIS family zinc finger 3                                                                   | BB207363  | 6.2007 | 9.7368  | -3.5361 |
| 1435078_at   | Tanc2         | tetratricopeptide repeat, ankyrin repeat and coiled-coil containing 2                       | BQ173895  | 5.5537 | 9.0898  | -3.5361 |
| 1419045_at   | Slc25a23      | solute carrier family 25 (mitochondrial carrier; phosphate carrier), member 23              | NM_025877 | 4.6079 | 8.1457  | -3.5379 |
| 1421944_a_at | Asgr1         | asialoglycoprotein receptor 1                                                               | U09362    | 4.4687 | 8.0105  | -3.5418 |
| 1456748_a_at | Nipsnap1      | 4-nitrophenylphosphatase domain and non-neuronal SNAP25-like protein homolog 1 (C. elegans) | AV306253  | 5.7515 | 9.2966  | -3.5451 |
| 1418271_at   | Bhlhe22       | basic helix-loop-helix family, member e22                                                   | NM_021560 | 6.2441 | 9.7948  | -3.5507 |
| 1425175_at   | C1ql3         | C1q-like 3                                                                                  | BB768838  | 6.2760 | 9.8297  | -3.5537 |
| 1440684_at   | Lpcat2        | lysophosphatidylcholine acyltransferase 2                                                   | BB187472  | 4.5856 | 8.1406  | -3.5550 |
| 1423509_a_at | Iapp          | islet amyloid polypeptide                                                                   | BM569571  | 4.7989 | 8.3541  | -3.5552 |
| 1427004_at   | Fbxo2         | F-box protein 2                                                                             | BB311718  | 7.6586 | 11.2237 | -3.5652 |
| 1420764_at   | Scrg1         | scrapie responsive gene 1                                                                   | NM_009136 | 4.7469 | 8.3138  | -3.5669 |
| 1423537_at   | Gap43         | growth associated protein 43                                                                | BB622036  | 4.3588 | 7.9260  | -3.5672 |
| 1456498_at   | Itga4         | integrin alpha 4                                                                            | BB284583  | 4.4394 | 8.0161  | -3.5767 |
| 1428774_at   | Gpc6          | glypican 6                                                                                  | AK020118  | 5.8297 | 9.4098  | -3.5801 |
| 1455717_s_at | Daam2         | dishevelled associated activator of morphogenesis 2                                         | BM206030  | 3.9024 | 7.4882  | -3.5858 |

|              |               |                                                                   |           |        |         |         |
|--------------|---------------|-------------------------------------------------------------------|-----------|--------|---------|---------|
| 1425560_a_at | S100a16       | S100 calcium binding protein A16                                  | BC020031  | 6.6681 | 10.2604 | -3.5923 |
| 1437417_s_at | Gpc6          | glypican 6                                                        | BB493031  | 3.8187 | 7.4112  | -3.5924 |
| 1424271_at   | Dclk1         | doublecortin-like kinase 1                                        | AW105916  | 6.1639 | 9.7563  | -3.5925 |
| 1455737_at   | Ppm1h         | protein phosphatase 1H (PP2C domain containing)                   | AU040848  | 5.6110 | 9.2091  | -3.5981 |
| 1426272_at   | Lmbr1         | limb region 1                                                     | BG070844  | 5.1383 | 8.7401  | -3.6018 |
| 1421028_a_at | Mef2c         | myocyte enhancer factor 2C                                        | A1595932  | 5.1317 | 8.7365  | -3.6047 |
| 1429667_at   | Pou4f1        | POU domain, class 4, transcription factor 1                       | BB465134  | 4.4162 | 8.0224  | -3.6062 |
| 1426562_a_at | Olfm1         | olfactomedin 1                                                    | BE952082  | 5.0041 | 8.6118  | -3.6077 |
| 1454824_s_at | Mtus1         | mitochondrial tumor suppressor 1                                  | BB699957  | 4.6306 | 8.2458  | -3.6152 |
| 1448789_at   | Aldh1a3       | aldehyde dehydrogenase family 1, subfamily A3                     | AF253409  | 5.0826 | 8.6982  | -3.6155 |
| 1425702_a_at | Enpp5         | ectonucleotide pyrophosphatase/phosphodiesterase 5                | BC011294  | 4.5657 | 8.1876  | -3.6219 |
| 1455395_at   | Oxsm          | 3-oxoacyl-ACP synthase, mitochondrial                             | BB446073  | 3.2574 | 6.8811  | -3.6238 |
| 1417073_a_at | Qk            | quaking                                                           | NM_021881 | 7.7196 | 11.3476 | -3.6279 |
| 1435022_at   | Alx1          | ALX homeobox 1                                                    | BB366930  | 3.6055 | 7.2372  | -3.6317 |
| 1438543_at   |               |                                                                   | BB453810  | 3.4443 | 7.0826  | -3.6383 |
| 1424270_at   | Dclk1         | doublecortin-like kinase 1                                        | AW105916  | 4.4791 | 8.1314  | -3.6523 |
| 1452250_a_at | Col6a2        | collagen, type VI, alpha 2                                        | BI455189  | 6.0189 | 9.6816  | -3.6627 |
| 1447676_x_at | S100a16       | S100 calcium binding protein A16                                  | AV074236  | 6.3729 | 10.0403 | -3.6674 |
| 1449146_at   | Notch4        | notch 4                                                           | NM_010929 | 3.3923 | 7.0719  | -3.6796 |
| 1443983_at   |               |                                                                   | BB218653  | 4.1049 | 7.7892  | -3.6843 |
| 1426712_at   | Slc6a15       | solute carrier family 6 (neurotransmitter transporter), member 15 | BB129409  | 5.2868 | 8.9731  | -3.6863 |
| 1423405_at   | Timp4         | tissue inhibitor of metalloproteinase 4                           | BI788452  | 2.7744 | 6.4737  | -3.6993 |
| 1417585_at   | Nup210        | nucleoporin 210                                                   | NM_018815 | 4.6941 | 8.3994  | -3.7053 |
| 1436037_at   | Itga4         | integrin alpha 4                                                  | BB205589  | 5.4269 | 9.1324  | -3.7055 |
| 1456764_at   | Slc35f3       | solute carrier family 35, member F3                               | BB427860  | 3.3762 | 7.0826  | -3.7064 |
| 1435892_at   | Asx13         | additional sex combs like 3 (Drosophila)                          | BB762904  | 4.2333 | 7.9398  | -3.7065 |
| 1440944_at   | Anks1b        | ankyrin repeat and sterile alpha motif domain containing 1B       | BF463236  | 3.3086 | 7.0284  | -3.7198 |
| 1423420_at   | Adrb1         | adrenergic receptor, beta 1                                       | AK018378  | 3.5280 | 7.2525  | -3.7246 |
| 1445804_at   |               |                                                                   | BB667304  | 2.8435 | 6.5730  | -3.7295 |
| 1448550_at   | Lbp           | lipopolysaccharide binding protein                                | NM_008489 | 5.1103 | 8.8399  | -3.7296 |
| 1450875_at   | Gpr37         | G protein-coupled receptor 37                                     | BQ175510  | 5.0002 | 8.7400  | -3.7398 |
| 1460463_at   | H60c          | histocompatibility 60c                                            | AK014573  | 3.2626 | 7.0040  | -3.7414 |
| 1456208_at   | Gpat2         | glycerol-3-phosphate acyltransferase 2, mitochondrial             | BI407212  | 4.5974 | 8.3423  | -3.7449 |
| 1420362_a_at | Bik           | BCL2-interacting killer                                           | NM_007546 | 3.3504 | 7.1037  | -3.7533 |
| 1455468_at   | Dpy19l3       | dpy-19-like 3 (C. elegans)                                        | BB768758  | 4.7207 | 8.4766  | -3.7559 |
| 1445523_at   | Gjc3          | gap junction protein, gamma 3                                     | BB315012  | 4.6801 | 8.4424  | -3.7623 |
| 1417391_a_at | Il16          | interleukin 16                                                    | BC026894  | 4.6694 | 8.4341  | -3.7647 |
| 1460607_at   | Igsf11        | immunoglobulin superfamily, member 11                             | BM899311  | 5.0745 | 8.8461  | -3.7717 |
| 1436948_a_at | Fam70a        | family with sequence similarity 70, member A                      | BB520013  | 3.1525 | 6.9332  | -3.7807 |
| 1424067_at   | Icam1         | intercellular adhesion molecule 1                                 | BC008626  | 3.9701 | 7.7531  | -3.7830 |
| 1437176_at   | Nlrc5         | NLR family, CARD domain containing 5                              | AV277444  | 4.6674 | 8.4531  | -3.7857 |
| 1447299_at   |               |                                                                   | BF321332  | 3.9185 | 7.7111  | -3.7926 |
| 1454832_at   | Phactr1       | phosphatase and actin regulator 1                                 | BG228702  | 4.6885 | 8.4868  | -3.7983 |
| 1460239_at   | Tspan13       | tetraspanin 13                                                    | BB807707  | 5.7292 | 9.5298  | -3.8006 |
| 1427019_at   | Ptprz1        | protein tyrosine phosphatase, receptor type Z, polypeptide 1      | BC002298  | 3.2599 | 7.0611  | -3.8012 |
| 1441065_at   | Shc3          | src homology 2 domain-containing transforming protein C3          | BB305753  | 4.1489 | 7.9515  | -3.8026 |
| 1435060_at   | Tmod2         | tropomodulin 2                                                    | BB667124  | 4.8127 | 8.6228  | -3.8101 |
| 1452903_at   | 6230427J02Rik | RIKEN cDNA 6230427J02 gene                                        | AK020090  | 6.7937 | 10.6054 | -3.8117 |
| 1437766_at   |               |                                                                   | AA177898  | 4.7538 | 8.5709  | -3.8171 |
| 1455793_at   | Fam149a       | family with sequence similarity 149, member A                     | BB766438  | 5.7575 | 9.5776  | -3.8201 |
| 1435695_a_at | Ggct          | gamma-glutamyl cyclotransferase                                   | AA673177  | 6.4230 | 10.2485 | -3.8255 |
| 1434918_at   | Sox6          | SRY-box containing gene 6                                         | AV281802  | 6.0579 | 9.8865  | -3.8286 |
| 1427433_s_at | Hoxa3         | homeobox A3                                                       | BB496114  | 4.0569 | 7.8900  | -3.8331 |
| 1451451_at   | Gca           | grancalcin                                                        | BC021450  | 2.6565 | 6.4898  | -3.8333 |
| 1456606_a_at |               |                                                                   | AV259240  | 4.9771 | 8.8144  | -3.8373 |
| 1436501_at   | Mtus1         | mitochondrial tumor suppressor 1                                  | BB747681  | 3.4443 | 7.2842  | -3.8400 |
| 1417276_at   | Tulp2         | tubby-like protein 2                                              | NM_008807 | 4.0527 | 7.9081  | -3.8554 |
| 1425469_a_at |               |                                                                   | BC003855  | 8.6053 | 12.4625 | -3.8572 |
| 1416617_at   | Acss1         | acyl-CoA synthetase short-chain family member 1                   | NM_080575 | 4.0932 | 7.9515  | -3.8583 |



|              |               |                                                                     |           |        |         |         |
|--------------|---------------|---------------------------------------------------------------------|-----------|--------|---------|---------|
| 1428156_at   | Gng2          | guanine nucleotide binding protein (G protein), gamma 2             | AV021455  | 3.3062 | 7.1687  | -3.8624 |
| 1416498_at   | Ppic          | peptidylprolyl isomerase C                                          | NM_008908 | 8.0336 | 11.8991 | -3.8654 |
| 1416318_at   | Serp1b1a      | serine (or cysteine) peptidase inhibitor, clade B, member 1a        | AF426024  | 3.6990 | 7.5689  | -3.8700 |
| 1418105_at   | Stmn4         | stathmin-like 4                                                     | NM_019675 | 4.7768 | 8.6518  | -3.8750 |
| 1436178_at   | Leprel1       | leprecan-like 1                                                     | AW553532  | 5.3707 | 9.2539  | -3.8832 |
| 1424382_at   | Rcn3          | reticulocalbin 3, EF-hand calcium binding domain                    | BC025602  | 6.0949 | 9.9918  | -3.8969 |
| 1427797_s_at |               |                                                                     | BF580235  | 5.2283 | 9.1264  | -3.8981 |
| 1424395_at   | Asrg1         | asparaginase like 1                                                 | AU040643  | 5.2220 | 9.1264  | -3.9044 |
| 1433155_at   | B230204H03Rik | RIKEN cDNA B230204H03 gene                                          | AK020986  | 3.4443 | 7.3506  | -3.9063 |
| 1435987_x_at | 1110059G02Rik | RIKEN cDNA 1110059G02 gene                                          | BM570681  | 3.0872 | 6.9975  | -3.9103 |
| 1439022_at   | Phactr1       | phosphatase and actin regulator 1                                   | AV259240  | 5.0502 | 8.9645  | -3.9143 |
| 1417568_at   | Ncald         | neurocalcin delta                                                   | BG071381  | 5.5842 | 9.5069  | -3.9227 |
| 1438404_at   | Rnf144a       | ring finger protein 144A                                            | BB125272  | 4.6104 | 8.5340  | -3.9236 |
| 1453009_at   | Cpm           | carboxypeptidase M                                                  | AK004327  | 3.3762 | 7.3117  | -3.9356 |
| 1439568_at   | Greb1         | gene regulated by estrogen in breast cancer protein                 | AV373997  | 4.4763 | 8.4134  | -3.9371 |
| 1433716_x_at | Gfra2         | glial cell line derived neurotrophic factor family receptor alpha 2 | BB284482  | 5.0462 | 8.9874  | -3.9411 |
| 1417859_at   | Gas7          | growth arrest specific 7                                            | NM_008088 | 5.0970 | 9.0531  | -3.9562 |
| 1460252_s_at | Zfp105        | zinc finger protein 105                                             | NM_009544 | 3.4591 | 7.4308  | -3.9717 |
| 1416232_at   | Olig2         | oligodendrocyte transcription factor 2                              | AB038697  | 2.7614 | 6.7353  | -3.9738 |
| 1440142_s_at | Gfap          | glial fibrillary acidic protein                                     | BB750040  | 4.0352 | 8.0105  | -3.9753 |
| 1418601_at   | Aldh1a7       | aldehyde dehydrogenase family 1, subfamily A7                       | NM_011921 | 3.6768 | 7.6597  | -3.9829 |
| 1431475_a_at | Hoxa10        | homeobox A10                                                        | AK002670  | 3.5957 | 7.5840  | -3.9883 |
| 1419229_at   |               |                                                                     | NM_021300 | 4.1907 | 8.1876  | -3.9969 |
| 1422618_x_at |               |                                                                     | NM_009529 | 3.4184 | 7.4209  | -4.0025 |
| 1436238_at   | Lgi3          | leucine-rich repeat LGI family, member 3                            | A1841179  | 3.2416 | 7.2562  | -4.0146 |
| 1455796_x_at | Olfm1         | olfactomedin 1                                                      | BB549310  | 5.4443 | 9.4602  | -4.0159 |
| 1429203_at   | 2410076I21Rik | RIKEN cDNA 2410076I21 gene                                          | AK010725  | 4.5814 | 8.6044  | -4.0230 |
| 1428097_at   | 2510009E07Rik | RIKEN cDNA 2510009E07 gene                                          | AK010940  | 3.2470 | 7.2750  | -4.0280 |
| 1435748_at   | Gda           | guanine deaminase                                                   | AW911807  | 4.5576 | 8.5920  | -4.0343 |
| 1449074_at   | 1700019N12Rik | RIKEN cDNA 1700019N12 gene                                          | NM_025953 | 3.2028 | 7.2372  | -4.0344 |
| 1431644_a_at | Ica1          | islet cell autoantigen 1                                            | AK005965  | 3.2550 | 7.2935  | -4.0384 |
| 1450922_a_at | Tgfb2         | transforming growth factor, beta 2                                  | BF144658  | 4.0638 | 8.1061  | -4.0423 |
| 1442095_at   | Asxl3         | additional sex combs like 3 (Drosophila)                            | BB528113  | 4.4921 | 8.5348  | -4.0427 |
| 1436974_at   | Tmem88b       | transmembrane protein 88B                                           | AV327597  | 3.8626 | 7.9081  | -4.0455 |
| 1452270_s_at | Cubn          | cubilin (intrinsic factor-cobalamin receptor)                       | AF197159  | 4.1059 | 8.1559  | -4.0500 |
| 1450784_at   | Reck          | reversion-inducing-cysteine-rich protein with kazal motifs          | NM_016678 | 3.4986 | 7.5511  | -4.0525 |
| 1430600_at   | Cmtm5         | CKLF-like MARVEL transmembrane domain containing 5                  | AK013666  | 3.9536 | 8.0105  | -4.0569 |
| 1448598_at   | Mmp17         | matrix metalloproteinase 17                                         | NM_011846 | 6.1455 | 10.2101 | -4.0646 |
| 1456035_at   | Nxf3          | nuclear RNA export factor 3                                         | BM236468  | 5.9466 | 10.0319 | -4.0853 |
| 1451289_at   | Dclk1         | doublecortin-like kinase 1                                          | AW105916  | 5.5666 | 9.6540  | -4.0875 |
| 1448831_at   | Angpt2        | angiopoietin 2                                                      | NM_007426 | 6.1112 | 10.1995 | -4.0883 |
| 1417312_at   | Dkk3          | dickkopf homolog 3 (Xenopus laevis)                                 | AK004853  | 4.6248 | 8.7275  | -4.1027 |
| 1417482_at   | Tex19.1       | testis expressed gene 19.1                                          | NM_028602 | 4.2560 | 8.3716  | -4.1156 |
| 1418187_at   | Ramp2         | receptor (calcitonin) activity modifying protein 2                  | AF146523  | 4.5609 | 8.6849  | -4.1240 |
| 1429543_at   | 6230424C14Rik | RIKEN cDNA 6230424C14 gene                                          | A1553459  | 5.9873 | 10.1157 | -4.1285 |
| 1437197_at   | Sorbs2        | sorbin and SH3 domain containing 2                                  | BB251748  | 3.0600 | 7.1886  | -4.1285 |
| 1430583_at   | Nrcam         | neuron-glia-CAM-related cell adhesion molecule                      | BB064688  | 3.9482 | 8.0779  | -4.1298 |
| 1422617_at   |               |                                                                     | NM_009529 | 3.3831 | 7.5200  | -4.1369 |
| 1438455_at   | Pabpc4l       | poly(A) binding protein, cytoplasmic 4-like                         | A1464220  | 2.6481 | 6.7928  | -4.1447 |
| 1441972_at   | 6230424C14Rik | RIKEN cDNA 6230424C14 gene                                          | BE949277  | 6.2392 | 10.3872 | -4.1480 |
| 1417952_at   | Cyp2j6        | cytochrome P450, family 2, subfamily j, polypeptide 6               | NM_010008 | 4.5592 | 8.7072  | -4.1480 |
| 1418259_a_at | Entpd2        | ectonucleoside triphosphate diphosphohydrolase 2                    | NM_009849 | 5.4443 | 9.6060  | -4.1616 |
| 1452452_at   |               |                                                                     | M73818    | 6.3826 | 10.5455 | -4.1629 |
| 1423250_a_at | Tgfb2         | transforming growth factor, beta 2                                  | BF144658  | 4.7425 | 8.9065  | -4.1640 |
| 1443634_at   |               |                                                                     | BB761583  | 4.1881 | 8.3541  | -4.1660 |
| 1438511_a_at | 1190002H23Rik | RIKEN cDNA 1190002H23 gene                                          | BB408123  | 7.1711 | 11.3379 | -4.1669 |
| 1436659_at   | Dclk1         | doublecortin-like kinase 1                                          | BB757120  | 6.2685 | 10.4359 | -4.1674 |
| 1456464_x_at | Syt11         | synaptotagmin XI                                                    | BB129990  | 5.6993 | 9.8691  | -4.1699 |
| 1435465_at   | Kbtbd11       | kelch repeat and BTB (POZ) domain containing 11                     | AW049906  | 4.9033 | 9.0738  | -4.1705 |

|              |               |                                                                                                |           |        |         |         |
|--------------|---------------|------------------------------------------------------------------------------------------------|-----------|--------|---------|---------|
| 1452967_at   | Gtsf1         | gametocyte specific factor 1                                                                   | AK005675  | 5.3298 | 9.5168  | -4.1870 |
| 1417780_at   | Lass4         | LAG1 homolog, ceramide synthase 4                                                              | BB006809  | 4.2858 | 8.4766  | -4.1908 |
| 1415857_at   | Emb           | embigin                                                                                        | BG064842  | 6.0437 | 10.2359 | -4.1922 |
| 1435197_at   | Pou3f3        | POU domain, class 3, transcription factor 3                                                    | BE993443  | 3.9230 | 8.1166  | -4.1936 |
| 1436171_at   | Arhgap30      | Rho GTPase activating protein 30                                                               | BM244999  | 4.7666 | 8.9664  | -4.1998 |
| 1450923_at   | Tgfb2         | transforming growth factor, beta 2                                                             | BF144658  | 3.9975 | 8.1974  | -4.1999 |
| 1425467_a_at | Plp1          | proteolipid protein (myelin) 1                                                                 | BB768495  | 6.0903 | 10.2906 | -4.2003 |
| 1416326_at   | Crip1         | cysteine-rich protein 1 (intestinal)                                                           | NM_007763 | 6.4478 | 10.6518 | -4.2040 |
| 1421163_a_at | Nfia          | nuclear factor I/A                                                                             | AF326553  | 4.1186 | 8.3289  | -4.2103 |
| 1445247_at   | C530044C16Rik | RIKEN cDNA C530044C16 gene                                                                     | BB424956  | 4.4013 | 8.6118  | -4.2105 |
| 1417901_a_at | Ica1          | islet cell autoantigen 1                                                                       | NM_010492 | 4.6564 | 8.8873  | -4.2309 |
| 1435714_x_at | Il17d         | interleukin 17D                                                                                | BB809808  | 2.9236 | 7.1594  | -4.2359 |
| 1448768_at   | Mog           | myelin oligodendrocyte glycoprotein                                                            | U64572    | 3.6591 | 7.8961  | -4.2370 |
| 1418402_at   | Adam19        | a disintegrin and metallopeptidase domain 19 (meltrin beta)                                    | NM_009616 | 5.0868 | 9.3261  | -4.2393 |
| 1429315_at   | Syt11         | synaptotagmin XI                                                                               | AK018343  | 4.8980 | 9.1562  | -4.2582 |
| 1440691_at   | Cyp2j6        | cytochrome P450, family 2, subfamily j, polypeptide 6                                          | AV373767  | 3.2613 | 7.5200  | -4.2587 |
| 1418674_at   | Osmr          | oncostatin M receptor                                                                          | AB015978  | 3.6819 | 7.9515  | -4.2696 |
| 1425784_a_at | Olfm1         | olfactomedin 1                                                                                 | D78264    | 6.8564 | 11.1275 | -4.2711 |
| 1418003_at   | 1190002H23Rik | RIKEN cDNA 1190002H23 gene                                                                     | NM_025427 | 7.1952 | 11.4698 | -4.2747 |
| 1416713_at   | Tppp3         | tubulin polymerization-promoting protein family member 3                                       | NM_026481 | 5.9357 | 10.2138 | -4.2781 |
| 1439768_x_at | Sema4f        | sema domain, immunoglobulin domain (Ig), TM domain, and short cytoplasmic domain               | BB271145  | 3.9441 | 8.2314  | -4.2874 |
| 1452761_a_at | Rbms3         | RNA binding motif, single stranded interacting protein                                         | AK018466  | 6.2201 | 10.5090 | -4.2889 |
| 1433968_a_at | Megf9         | multiple EGF-like-domains 9                                                                    | BQ174710  | 6.7353 | 11.0306 | -4.2954 |
| 1436751_at   | Wee2          | WEE1 homolog 2 (S. pombe)                                                                      | BG070796  | 3.4443 | 7.7423  | -4.2981 |
| 1423503_at   | Jam3          | junction adhesion molecule 3                                                                   | AK017692  | 4.7725 | 9.0711  | -4.2986 |
| 1456093_at   | Zfp536        | zinc finger protein 536                                                                        | BB732439  | 3.9153 | 8.2218  | -4.3065 |
| 1423166_at   | Cd36          | CD36 antigen                                                                                   | BB534670  | 3.6090 | 7.9280  | -4.3190 |
| 1435553_at   | Pdzd2         | PDZ domain containing 2                                                                        | AV376136  | 3.8342 | 8.1559  | -4.3216 |
| 1451506_at   | Mef2c         | myocyte enhancer factor 2C                                                                     | BB280300  | 4.7905 | 9.1160  | -4.3256 |
| 1416872_at   | Tspan6        | tetraspanin 6                                                                                  | NM_019656 | 4.3443 | 8.6710  | -4.3267 |
| 1437462_x_at | Mmp15         | matrix metallopeptidase 15                                                                     | BB484002  | 3.5616 | 7.8961  | -4.3345 |
| 1423640_at   | Synpr         | synaptoporin                                                                                   | BC026512  | 4.0103 | 8.3452  | -4.3349 |
| 1424698_s_at | Gca           | granulocyte colony-stimulating factor receptor 1                                               | BC021450  | 3.2085 | 7.5531  | -4.3446 |
| 1448211_at   | Atp6v0e2      | ATPase, H+ transporting, lysosomal V0 subunit E2                                               | NM_133764 | 6.5866 | 10.9400 | -4.3534 |
| 1429668_at   | Pou4f1        | POU domain, class 4, transcription factor 1                                                    | BB465134  | 2.6405 | 7.0061  | -4.3656 |
| 1442180_at   | Dleu7         | deleted in lymphocytic leukemia, 7                                                             | BB382040  | 2.8966 | 7.2656  | -4.3690 |
| 1424265_at   | Npl           | N-acetylneuraminase pyruvate lyase                                                             | BC022734  | 4.1526 | 8.5242  | -4.3716 |
| 1416414_at   | Emilin1       | elastin microfibril interfacier 1                                                              | NM_133918 | 6.4388 | 10.8177 | -4.3789 |
| 1419062_at   | Epb4.1l3      | erythrocyte protein band 4.1-like 3                                                            | NM_013813 | 5.2571 | 9.6394  | -4.3824 |
| 1418589_a_at | Mlf1          | myeloid leukemia factor 1                                                                      | AF100171  | 2.7375 | 7.1280  | -4.3905 |
| 1448136_at   | Enpp2         | ectonucleotide pyrophosphatase/phosphodiesterase 2                                             | BC003264  | 5.7304 | 10.1296 | -4.3992 |
| 1417275_at   | Mal           | myelin and lymphocyte protein, T cell differentiation protein                                  | NM_010762 | 3.0872 | 7.5037  | -4.4165 |
| 1432205_a_at | Mtus2         | microtubule associated tumor suppressor candidate 2                                            | AK002529  | 3.9910 | 8.4215  | -4.4306 |
| 1455722_at   |               |                                                                                                | BB425316  | 3.9755 | 8.4074  | -4.4320 |
| 1436296_x_at | Dnaic2        | dynein, axonemal, intermediate chain 2                                                         | BE946605  | 3.8679 | 8.3010  | -4.4331 |
| 1423429_at   | Rhox5         | reproductive homeobox 5                                                                        | BM210473  | 8.1343 | 12.5741 | -4.4397 |
| 1436166_at   | Stox2         | storkhead box 2                                                                                | AV231210  | 4.8217 | 9.2653  | -4.4436 |
| 1448147_at   | Tnfrsf19      | tumor necrosis factor receptor superfamily, member 19                                          | NM_013869 | 3.2876 | 7.7384  | -4.4508 |
| 1448260_at   | Uchl1         | ubiquitin carboxy-terminal hydrolase L1                                                        | NM_011670 | 5.7124 | 10.1637 | -4.4513 |
| 1429314_at   | Syt11         | synaptotagmin XI                                                                               | AK018343  | 5.5499 | 10.0054 | -4.4556 |
| 1450268_at   | Fign          | fidgetin                                                                                       | NM_021716 | 3.9759 | 8.4485  | -4.4726 |
| 1449065_at   | Acot1         | acyl-CoA thioesterase 1                                                                        | NM_012006 | 3.9130 | 8.3946  | -4.4816 |
| 1452284_at   | Ptprz1        | protein tyrosine phosphatase, receptor type Z, polypeptide 1                                   | BC002298  | 2.9256 | 7.4112  | -4.4856 |
| 1439827_at   | Adams12       | a disintegrin-like and metallopeptidase (reprolysin type) with thrombospondin type 1 motif, 12 | BB004039  | 3.1802 | 7.6668  | -4.4866 |
| 1443904_at   | Fads6         | fatty acid desaturase domain family, member 6                                                  | BE996238  | 3.2416 | 7.7384  | -4.4968 |
| 1435314_at   | Tph2          | tryptophan hydroxylase 2                                                                       | BG071575  | 2.8966 | 7.3941  | -4.4975 |

|              |               |                                                                                        |           |        |         |         |
|--------------|---------------|----------------------------------------------------------------------------------------|-----------|--------|---------|---------|
| 1457118_at   |               |                                                                                        | AV353605  | 5.3077 | 9.8268  | -4.5191 |
| 1436937_at   | Rbms3         | RNA binding motif, single stranded interacting protein                                 | BB053506  | 4.9575 | 9.4815  | -4.5240 |
| 1435193_at   | A230050P20Rik | RIKEN cDNA A230050P20 gene                                                             | BB085904  | 4.6276 | 9.1696  | -4.5420 |
| 1423091_a_at | Gpm6b         | glycoprotein m6b                                                                       | AK016567  | 7.4809 | 12.0323 | -4.5514 |
| 1434353_at   | Sfmbt2        | Scm-like with four mbt domains 2                                                       | BM200222  | 3.5226 | 8.0886  | -4.5660 |
| 1449264_at   | Syt11         | synaptotagmin XI                                                                       | BC025207  | 3.9267 | 8.4940  | -4.5673 |
| 1453366_at   | Tdrkh         | tudor and KH domain containing protein                                                 | AK012596  | 4.9055 | 9.4815  | -4.5760 |
| 1427356_at   | Fam89a        | family with sequence similarity 89, member A                                           | BC023460  | 4.9906 | 9.5822  | -4.5916 |
| 1453188_at   | 6230424C14Rik | RIKEN cDNA 6230424C14 gene                                                             | AI553459  | 4.8114 | 9.4035  | -4.5921 |
| 1442019_at   |               |                                                                                        | BB627097  | 5.6710 | 10.2662 | -4.5953 |
| 1440339_at   | Enpp1         | ectonucleotide pyrophosphatase/phosphodiesterase 1                                     | AW910504  | 2.5162 | 7.1263  | -4.6101 |
| 1436870_s_at | Afap1l2       | actin filament associated protein 1-like 2                                             | BG068103  | 5.5143 | 10.1308 | -4.6165 |
| 1421075_s_at | Cyp7b1        | cytochrome P450, family 7, subfamily b, polypeptide 1                                  | NM_007825 | 3.3134 | 7.9398  | -4.6264 |
| 1451204_at   | Scara5        | scavenger receptor class A, member 5 (putative)                                        | BC016096  | 6.0808 | 10.7211 | -4.6403 |
| 1452474_a_at | Art3          | ADP-ribosyltransferase 3                                                               | AJ311773  | 4.2003 | 8.8422  | -4.6419 |
| 1440177_at   | Grik3         | glutamate receptor, ionotropic, kainate 3                                              | BM899529  | 3.3187 | 7.9631  | -4.6445 |
| 1428571_at   | Col9a1        | collagen, type IX, alpha 1                                                             | AK004383  | 4.1529 | 8.8102  | -4.6573 |
| 1418407_at   | Pde8a         | phosphodiesterase 8A                                                                   | BB220000  | 3.6851 | 8.3629  | -4.6778 |
| 1431302_a_at | Nudt7         | nudix (nucleoside diphosphate linked moiety X)-type motif 7                            | AK011172  | 3.7420 | 8.4325  | -4.6905 |
| 1457270_at   | Gas7          | growth arrest specific 7                                                               | AI506234  | 6.4952 | 11.1982 | -4.7030 |
| 1415874_at   | Spry1         | sprouty homolog 1 (Drosophila)                                                         | NM_011896 | 5.4108 | 10.1144 | -4.7036 |
| 1451507_at   | Mef2c         | myocyte enhancer factor 2C                                                             | BB280300  | 3.3086 | 8.0161  | -4.7075 |
| 1456033_at   | Tbx4          | T-box 4                                                                                | AV226212  | 4.1820 | 8.8934  | -4.7115 |
| 1454806_at   | Fam49a        | family with sequence similarity 49, member A                                           | AV228737  | 3.0874 | 7.8001  | -4.7127 |
| 1434073_at   |               |                                                                                        | BB028100  | 3.3762 | 8.1114  | -4.7352 |
| 1416619_at   | 4632428N05Rik | RIKEN cDNA 4632428N05 gene                                                             | BC003967  | 3.7669 | 8.5026  | -4.7357 |
| 1427884_at   | Col3a1        | collagen, type III, alpha 1                                                            | AW550625  | 4.5588 | 9.2989  | -4.7401 |
| 1423294_at   | Mest          | mesoderm specific transcript                                                           | AW555393  | 4.8277 | 9.5696  | -4.7419 |
| 1429185_at   | Arhgef26      | Rho guanine nucleotide exchange factor (GEF) 26                                        | BB774721  | 5.5029 | 10.2455 | -4.7426 |
| 1448269_a_at | Klhl13        | kelch-like 13 (Drosophila)                                                             | NM_026167 | 3.2187 | 7.9664  | -4.7477 |
| 1435672_at   | 3830612M24    | uncharacterized protein 3830612M24                                                     | BM118658  | 5.4108 | 10.1635 | -4.7527 |
| 1451244_a_at | Zfp422        | zinc finger protein 422                                                                | BC018339  | 4.1140 | 8.8720  | -4.7580 |
| 1435389_at   | Reps2         | RALBP1 associated Eps domain containing protein 2                                      | BM899236  | 3.9228 | 8.6814  | -4.7586 |
| 1438018_at   | Hook1         | hook homolog 1 (Drosophila)                                                            | BB463518  | 4.3362 | 9.1056  | -4.7693 |
| 1425923_at   | Mycn          | v-myc myelocytomatosis viral related oncogene, neuroblastoma derived (avian)           | M36277    | 6.5424 | 11.3128 | -4.7704 |
| 1437323_a_at | Iapp          | islet amyloid polypeptide                                                              | BB434117  | 3.7409 | 8.5139  | -4.7730 |
| 1430579_at   | Tnik          | TRAF2 and NCK interacting kinase                                                       | AW045551  | 3.0984 | 7.8716  | -4.7732 |
| 1438114_x_at | Efs           | embryonal Fyn-associated substrate                                                     | BB168690  | 3.9701 | 8.7545  | -4.7844 |
| 1422498_at   | Mageh1        | melanoma antigen, family H, 1                                                          | AF319981  | 3.4752 | 8.2802  | -4.8050 |
| 1457157_at   | Plch1         | phospholipase C, eta 1                                                                 | BB247624  | 3.5815 | 8.3963  | -4.8148 |
| 1426959_at   | Bdh1          | 3-hydroxybutyrate dehydrogenase, type 1                                                | BF322712  | 3.2416 | 8.0779  | -4.8364 |
| 1419550_a_at | Stk39         | serine/threonine kinase 39                                                             | BG919998  | 3.9024 | 8.7511  | -4.8487 |
| 1457778_at   | Stox2         | storkhead box 2                                                                        | BB364290  | 3.2416 | 8.1321  | -4.8905 |
| 1437409_s_at | Gpr126        | G protein-coupled receptor 126                                                         | BB812574  | 4.8983 | 9.7909  | -4.8926 |
| 1418301_at   | Irf6          | interferon regulatory factor 6                                                         | NM_016851 | 3.4443 | 8.3423  | -4.8980 |
| 1441836_x_at | Gtsf1         | gametocyte specific factor 1                                                           | AV045004  | 5.5288 | 10.4286 | -4.8998 |
| 1433651_at   | Wtip          | WT1-interacting protein                                                                | BE136550  | 4.2966 | 9.2018  | -4.9052 |
| 1433691_at   | Ppp1r3c       | protein phosphatase 1, regulatory (inhibitor) subunit 3C                               | BQ176864  | 3.8741 | 8.7810  | -4.9068 |
| 1434593_at   | Eif5a2        | eukaryotic translation initiation factor 5A2                                           | AV271901  | 4.1595 | 9.0711  | -4.9116 |
| 1436755_at   | Itih5         | inter-alpha (globulin) inhibitor H5                                                    | AI317339  | 3.9017 | 8.8272  | -4.9255 |
| 1416357_a_at | Mcam          | melanoma cell adhesion molecule                                                        | NM_023061 | 4.8510 | 9.7768  | -4.9257 |
| 1454727_at   | Afap1l1       | actin filament associated protein 1-like 1                                             | BB106834  | 4.4954 | 9.4211  | -4.9257 |
| 1416371_at   | Apod          | apolipoprotein D                                                                       | NM_007470 | 4.8053 | 9.7311  | -4.9258 |
| 1434121_at   | Lgi4          | leucine-rich repeat LGI family, member 4                                               | BB756793  | 5.3521 | 10.3021 | -4.9500 |
| 1419383_at   | S100b         | S100 protein, beta polypeptide, neural                                                 | NM_009115 | 4.6127 | 9.5677  | -4.9550 |
| 1440435_at   | Ky            | kyphoscoliosis peptidase                                                               | BB126077  | 4.2583 | 9.2413  | -4.9829 |
| 1450883_a_at | Cd36          | CD36 antigen                                                                           | BB534670  | 3.0227 | 8.0105  | -4.9878 |
| 1425826_a_at | Sorbs1        | sorbin and SH3 domain containing 1                                                     | AF078667  | 6.0732 | 11.0687 | -4.9955 |
| 1429459_at   | Sema3d        | sema domain, immunoglobulin domain (Ig), short basic domain, secreted, (semaphorin) 3D | BB499147  | 3.2612 | 8.2755  | -5.0143 |

|              |               |                                                                   |           |        |         |         |
|--------------|---------------|-------------------------------------------------------------------|-----------|--------|---------|---------|
| 1442542_at   | Eya4          | eyes absent 4 homolog (Drosophila)                                | BB363812  | 3.3705 | 8.3860  | -5.0155 |
| 1415856_at   | Emb           | embigin                                                           | BG064842  | 4.5168 | 9.5569  | -5.0401 |
| 1428792_at   | Bcas1         | breast carcinoma amplified sequence 1                             | AK008957  | 5.6610 | 10.7015 | -5.0405 |
| 1421074_at   | Cyp7b1        | cytochrome P450, family 7, subfamily b, polypeptide 1             | NM_007825 | 3.0872 | 8.1321  | -5.0449 |
| 1437950_at   | Fam149a       | family with sequence similarity 149, member A                     | BB818275  | 2.9445 | 7.9936  | -5.0491 |
| 1428209_at   | Bex4          | brain expressed gene 4                                            | AK010400  | 3.5771 | 8.6518  | -5.0747 |
| 1435343_at   | Dock10        | dedicator of cytokinesis 10                                       | BF715043  | 3.9083 | 8.9851  | -5.0768 |
| 1418780_at   | Cyp39a1       | cytochrome P450, family 39, subfamily a, polypeptide 1            | NM_018887 | 3.7394 | 8.8208  | -5.0815 |
| 1448919_at   | Cd302         | CD302 antigen                                                     | NM_025422 | 3.8342 | 8.9244  | -5.0902 |
| 1448926_at   | Hoxa5         | homeobox A5                                                       | BC011063  | 3.6386 | 8.7451  | -5.1064 |
| 1457275_at   | Synm          | synemin, intermediate filament protein                            | AI594683  | 3.9666 | 9.0871  | -5.1205 |
| 1425606_at   | Slc5a8        | solute carrier family 5 (iodide transporter), member 8            | BC017691  | 2.8350 | 7.9573  | -5.1224 |
| 1424318_at   | 1110067D22Rik | RIKEN cDNA 1110067D22 gene                                        | BC019131  | 5.1267 | 10.2576 | -5.1309 |
| 1423851_a_at | Shisa2        | shisa homolog 2 (Xenopus laevis)                                  | BC024118  | 3.0320 | 8.1726  | -5.1407 |
| 1419276_at   | Enpp1         | ectonucleotide pyrophosphatase/phosphodiesterase 1                | AF339910  | 2.9350 | 8.0779  | -5.1429 |
| 1424852_at   | Mef2c         | myocyte enhancer factor 2C                                        | BB280300  | 4.6017 | 9.7513  | -5.1497 |
| 1416003_at   | Cldn11        | claudin 11                                                        | NM_008770 | 3.5226 | 8.6954  | -5.1728 |
| 1449465_at   | Reln          | reelin                                                            | NM_011261 | 4.2356 | 9.4294  | -5.1938 |
| 1453329_s_at | Nkain2        | Na <sup>+</sup> /K <sup>+</sup> transporting ATPase interacting 2 | AK018248  | 4.4867 | 9.6927  | -5.2059 |
| 1435749_at   | Gda           | guanine deaminase                                                 | AW911807  | 3.5127 | 8.7275  | -5.2148 |
| 1437318_at   | Pak3          | p21 protein (Cdc42/Rac)-activated kinase 3                        | BB468082  | 3.3411 | 8.5618  | -5.2206 |
| 1441946_at   | Itih5         | inter-alpha (globulin) inhibitor H5                               | AV239969  | 4.3448 | 9.5803  | -5.2355 |
| 1423852_at   | Shisa2        | shisa homolog 2 (Xenopus laevis)                                  | BC024118  | 3.3442 | 8.5882  | -5.2440 |
| 1456182_x_at | Mela          | melanoma antigen                                                  | BB795191  | 7.3069 | 12.5672 | -5.2603 |
| 1451313_a_at | 1110067D22Rik | RIKEN cDNA 1110067D22 gene                                        | BC019131  | 4.5902 | 9.8562  | -5.2660 |
| 1415978_at   | Tubb3         | tubulin, beta 3 class III                                         | NM_023279 | 5.0023 | 10.2733 | -5.2710 |
| 1419595_a_at | Ggh           | gamma-glutamyl hydrolase                                          | NM_010281 | 4.4957 | 9.7685  | -5.2728 |
| 1421027_a_at | Mef2c         | myocyte enhancer factor 2C                                        | AI595932  | 4.6281 | 9.9192  | -5.2911 |
| 1460258_at   | Lect1         | leukocyte cell derived chemotaxin 1                               | NM_010701 | 3.8539 | 9.1460  | -5.2921 |
| 1417388_at   | Bex2          | brain expressed X-linked 2                                        | NM_009749 | 4.7677 | 10.0659 | -5.2982 |
| 1429413_at   | Cpm           | carboxypeptidase M                                                | AK017670  | 3.4648 | 8.7678  | -5.3029 |
| 1435014_at   | Rab39b        | RAB39B, member RAS oncogene family                                | AV162168  | 2.4513 | 7.7607  | -5.3095 |
| 1423693_at   | Cela1         | chymotrypsin-like elastase family, member 1                       | BC011218  | 4.6972 | 10.0106 | -5.3134 |
| 1418892_at   | Rhoj          | ras homolog gene family, member J                                 | AF309564  | 4.5100 | 9.8322  | -5.3222 |
| 1450734_at   | Sec16b        | SEC16 homolog B (S. cerevisiae)                                   | NM_033354 | 3.1059 | 8.4299  | -5.3240 |
| 1426010_a_at | Epb4.1l3      | erythrocyte protein band 4.1-like 3                               | AF177146  | 4.4074 | 9.7401  | -5.3327 |
| 1452762_at   | Rbms3         | RNA binding motif, single stranded interacting protein            | AK018466  | 3.9242 | 9.2704  | -5.3462 |
| 1418744_s_at | Tesc          | tescalcin                                                         | NM_021344 | 5.9181 | 11.2644 | -5.3462 |
| 1435854_at   | Opalin        | oligodendrocytic myelin paranodal and inner loop protein          | AW490730  | 5.1383 | 10.5080 | -5.3697 |
| 1455176_a_at | Syt11         | synaptotagmin XI                                                  | BF457392  | 4.1498 | 9.5331  | -5.3833 |
| 1416149_at   | Olig1         | oligodendrocyte transcription factor 1                            | AB038696  | 3.3762 | 8.7611  | -5.3850 |
| 1424677_at   | Cyp2j9        | cytochrome P450, family 2, subfamily j, polypeptide 9             | AF336850  | 3.3305 | 8.7410  | -5.4106 |
| 1436204_at   | 1110059G02Rik | RIKEN cDNA 1110059G02 gene                                        | BM730637  | 3.6301 | 9.0658  | -5.4357 |
| 1442873_at   | Fign          | fidgetin                                                          | BB479296  | 3.1069 | 8.5694  | -5.4625 |
| 1456326_at   | Fndc3c1       | fibronectin type III domain containing 3C1                        | BG065026  | 4.4865 | 9.9530  | -5.4666 |
| 1456570_at   | Epb4.1l4b     | erythrocyte protein band 4.1-like 4b                              | BB801576  | 2.8050 | 8.2848  | -5.4798 |
| 1447112_s_at | Cryl1         | crystallin, lambda 1                                              | C85932    | 5.4771 | 10.9617 | -5.4846 |
| 1422545_at   | Tbx2          | T-box 2                                                           | NM_009324 | 3.5127 | 8.9987  | -5.4860 |
| 1418743_a_at | Tesc          | tescalcin                                                         | NM_021344 | 4.6659 | 10.1568 | -5.4909 |
| 1436203_a_at | 1110059G02Rik | RIKEN cDNA 1110059G02 gene                                        | BM730637  | 2.7735 | 8.2755  | -5.5020 |
| 1434606_at   | ErbB3         | v-erb-b2 erythroblastic leukemia viral oncogene homolog 3 (avian) | BF140685  | 6.0751 | 11.5777 | -5.5026 |
| 1450435_at   | L1cam         | L1 cell adhesion molecule                                         | NM_008478 | 6.0047 | 11.5206 | -5.5159 |
| 1442350_at   |               |                                                                   | AV233462  | 3.2219 | 8.7578  | -5.5359 |
| 1448501_at   | Tspan6        | tetraspanin 6                                                     | NM_019656 | 3.2627 | 8.8177  | -5.5549 |
| 1419722_at   | Klk8          | kallikrein related-peptidase 8                                    | NM_008940 | 6.0903 | 11.7463 | -5.6561 |
| 1418294_at   | Epb4.1l4b     | erythrocyte protein band 4.1-like 4b                              | NM_019427 | 5.7843 | 11.4407 | -5.6564 |
| 1451689_a_at | Sox10         | SRY-box containing gene 10                                        | BC018551  | 6.3192 | 11.9877 | -5.6685 |
| 1450567_a_at | Col2a1        | collagen, type II, alpha 1                                        | NM_031163 | 5.0107 | 10.6908 | -5.6801 |
| 1436731_at   | Zfp385b       | zinc finger protein 385B                                          | BB333374  | 4.0930 | 9.7735  | -5.6805 |
| 1418310_a_at | Rlbp1         | retinaldehyde binding protein 1                                   | NM_020599 | 3.2110 | 8.9035  | -5.6925 |

|              |               |                                                                                                |           |        |         |         |
|--------------|---------------|------------------------------------------------------------------------------------------------|-----------|--------|---------|---------|
| 1423341_at   | Cspg4         | chondroitin sulfate proteoglycan 4                                                             | BB377873  | 4.8719 | 10.5720 | -5.7001 |
| 1418876_at   | Foxd1         | forkhead box D1                                                                                | BB662927  | 3.8464 | 9.5594  | -5.7129 |
| 1416178_a_at | Plekhb1       | pleckstrin homology domain containing, family B (evectins) member 1                            | NM_013746 | 5.1280 | 10.8514 | -5.7234 |
| 1421566_at   | Pet2          | plasmacytoma expressed transcript 2                                                            | NM_008821 | 2.7570 | 8.4853  | -5.7283 |
| 1419063_at   | Ugt8a         | UDP galactosyltransferase 8A                                                                   | NM_011674 | 2.6619 | 8.4358  | -5.7740 |
| 1451332_at   | Zfp521        | zinc finger protein 521                                                                        | BC021376  | 2.8217 | 8.6044  | -5.7827 |
| 1451961_a_at | Mbp           | myelin basic protein                                                                           | L07509    | 4.2966 | 10.0807 | -5.7840 |
| 1417836_at   | Gpx7          | glutathione peroxidase 7                                                                       | NM_024198 | 3.6128 | 9.3999  | -5.7871 |
| 1452141_a_at | Sepp1         | selenoprotein P, plasma, 1                                                                     | BC001991  | 4.4942 | 10.2823 | -5.7881 |
| 1435486_at   | Pak3          | p21 protein (Cdc42/Rac)-activated kinase 3                                                     | BQ175796  | 3.4952 | 9.2936  | -5.7984 |
| 1449273_at   | Cyfp2         | cytoplasmic FMR1 interacting protein 2                                                         | NM_133769 | 4.2966 | 10.1326 | -5.8359 |
| 1451446_at   | Antxr1        | anthrax toxin receptor 1                                                                       | AF378762  | 5.4771 | 11.3210 | -5.8439 |
| 1419100_at   | Serpina3n     | serine (or cysteine) peptidase inhibitor, clade A, member 3N                                   | NM_009252 | 5.5405 | 11.3898 | -5.8494 |
| 1418643_at   | Tspan13       | tetraspanin 13                                                                                 | BB807707  | 4.2067 | 10.0565 | -5.8499 |
| 1421001_a_at | Car6          | carbonic anhydrase 6                                                                           | NM_009802 | 6.0423 | 11.9378 | -5.8955 |
| 1428347_at   | Cyfp2         | cytoplasmic FMR1 interacting protein 2                                                         | AK005148  | 3.3762 | 9.2727  | -5.8966 |
| 1418599_at   | Col11a1       | collagen, type XI, alpha 1                                                                     | NM_007729 | 4.5290 | 10.4457 | -5.9168 |
| 1425942_a_at | Gpm6b         | glycoprotein m6b                                                                               | AF254879  | 5.1940 | 11.1304 | -5.9364 |
| 1429901_at   | Nkain2        | Na <sup>+</sup> /K <sup>+</sup> transporting ATPase interacting 2                              | AK018248  | 2.8966 | 8.8628  | -5.9662 |
| 1418406_at   | Pde8a         | phosphodiesterase 8A                                                                           | BB220000  | 4.2966 | 10.2872 | -5.9906 |
| 1449347_a_at |               |                                                                                                | NM_021365 | 3.3025 | 9.3149  | -6.0123 |
| 1436938_at   | Rbms3         | RNA binding motif, single stranded interacting protein                                         | BB053506  | 4.3299 | 10.3638 | -6.0339 |
| 1416795_at   | Cryl1         | crystallin, lambda 1                                                                           | NM_030004 | 4.7417 | 10.7780 | -6.0363 |
| 1424807_at   | Lama4         | laminin, alpha 4                                                                               | BB053010  | 4.3584 | 10.3997 | -6.0413 |
| 1424463_at   | Mfsd6         | major facilitator superfamily domain containing 6                                              | BF225441  | 3.9701 | 10.1055 | -6.1354 |
| 1422042_at   | Gjc3          | gap junction protein, gamma 3                                                                  | NM_080450 | 4.1160 | 10.2604 | -6.1444 |
| 1448005_at   | Sash1         | SAM and SH3 domain containing 1                                                                | BI658899  | 4.8717 | 11.0538 | -6.1822 |
| 1427346_at   |               |                                                                                                | X96606    | 4.5566 | 10.7573 | -6.2007 |
| 1416468_at   | Aldh1a1       | aldehyde dehydrogenase family 1, subfamily A1                                                  | NM_013467 | 3.5815 | 9.7850  | -6.2035 |
| 1434709_at   | Nrcam         | neuron-glia-CAM-related cell adhesion molecule                                                 | BB202655  | 3.6437 | 9.8516  | -6.2078 |
| 1448416_at   | Mgp           | matrix Gla protein                                                                             | NM_008597 | 4.2633 | 10.5371 | -6.2738 |
| 1422530_at   | Prph          | peripherin                                                                                     | NM_013639 | 4.0327 | 10.4066 | -6.3739 |
| 1427102_at   | Sifn4         | schlafen 4                                                                                     | AF099975  | 3.8530 | 10.2295 | -6.3765 |
| 1416114_at   | Sparcl1       | SPARC-like 1                                                                                   | NM_010097 | 4.2227 | 10.6054 | -6.3827 |
| 1455256_at   | Tnik          | TRAF2 and NCK interacting kinase                                                               | AI117633  | 3.3762 | 9.7964  | -6.4202 |
| 1451191_at   | Crabp2        | cellular retinoic acid binding protein II                                                      | BC018397  | 5.8877 | 12.3297 | -6.4420 |
| 1452968_at   | Cthrc1        | collagen triple helix repeat containing 1                                                      | AK003674  | 4.4976 | 10.9531 | -6.4556 |
| 1434342_at   | S100b         | S100 protein, beta polypeptide, neural                                                         | BB316114  | 3.2416 | 9.6973  | -6.4558 |
| 1420448_at   | Rhox2a        | reproductive homeobox 2A                                                                       | NM_029203 | 4.8305 | 11.3010 | -6.4705 |
| 1427677_a_at | Sox6          | SRY-box containing gene 6                                                                      | AJ010605  | 3.7341 | 10.2686 | -6.5344 |
| 1449154_at   | Col11a1       | collagen, type XI, alpha 1                                                                     | NM_007729 | 3.7420 | 10.3207 | -6.5787 |
| 1452298_a_at | Myo5b         | myosin VB                                                                                      | AW546331  | 3.3672 | 9.9530  | -6.5858 |
| 1437636_at   | Pydc4         | pyrin domain containing 4                                                                      | BB135602  | 4.1689 | 10.8185 | -6.6496 |
| 1429401_at   | Stox2         | storkhead box 2                                                                                | BM114398  | 4.0426 | 10.7304 | -6.6878 |
| 1450793_at   | 4930550L24Rik | RIKEN cDNA 4930550L24 gene                                                                     | NM_023774 | 3.8342 | 10.5487 | -6.7145 |
| 1425546_a_at | Trf           | transferrin                                                                                    | AF440692  | 4.3993 | 11.1275 | -6.7281 |
| 1436737_a_at | Sorbs1        | sorbin and SH3 domain containing 1                                                             | BB737680  | 4.0971 | 10.8610 | -6.7639 |
| 1428471_at   | Sorbs1        | sorbin and SH3 domain containing 1                                                             | BQ176684  | 4.8229 | 11.6452 | -6.8223 |
| 1447655_x_at | Sox6          | SRY-box containing gene 6                                                                      | BB257593  | 2.9982 | 9.8437  | -6.8456 |
| 1436719_at   | Slc35f1       | solute carrier family 35, member F1                                                            | BB758319  | 3.7744 | 10.6422 | -6.8679 |
| 1425468_at   | Plp1          | proteolipid protein (myelin) 1                                                                 | BB768495  | 4.6324 | 11.5145 | -6.8821 |
| 1456901_at   | Adams20       | a disintegrin-like and metallopeptidase (reprolysin type) with thrombospondin type 1 motif, 20 | AI450842  | 2.7376 | 9.7647  | -7.0270 |
| 1452257_at   | Bdh1          | 3-hydroxybutyrate dehydrogenase, type 1                                                        | BF322712  | 3.5189 | 10.5830 | -7.0641 |
| 1448788_at   | Cd200         | CD200 antigen                                                                                  | AF004023  | 2.9592 | 10.0311 | -7.0720 |
| 1448595_a_at | Bex1          | brain expressed gene 1                                                                         | NM_009052 | 3.4150 | 10.5030 | -7.0880 |
| 1419646_a_at | Mbp           | myelin basic protein                                                                           | NM_010777 | 5.4771 | 12.5829 | -7.1058 |
| 1417795_at   | Chl1          | cell adhesion molecule with homology to L1CAM                                                  | NM_007697 | 3.3872 | 10.5621 | -7.1749 |
| 1447624_s_at | Stox2         | storkhead box 2                                                                                | BB174262  | 4.9057 | 12.2895 | -7.3837 |
| 1429159_at   | Itih5         | inter-alpha (globulin) inhibitor H5                                                            | AK018605  | 3.3030 | 10.7275 | -7.4245 |
| 1420357_s_at |               |                                                                                                | NM_011726 | 3.1525 | 10.6347 | -7.4822 |
| 1454651_x_at | Mbp           | myelin basic protein                                                                           | BE994609  | 4.7429 | 12.3367 | -7.5937 |
| 1436201_x_at | Mbp           | myelin basic protein                                                                           | BB761376  | 4.8965 | 12.5966 | -7.7001 |

|              |         |                                               |           |        |         |         |
|--------------|---------|-----------------------------------------------|-----------|--------|---------|---------|
| 1415845_at   | Syt4    | synaptotagmin IV                              | AV336547  | 5.1786 | 12.8793 | -7.7008 |
| 1451718_at   | Plp1    | proteolipid protein (myelin) 1                | BB768495  | 4.3090 | 12.1198 | -7.8108 |
| 1457373_at   |         |                                               | BB495006  | 3.5889 | 11.5586 | -7.9697 |
| 1415844_at   | Syt4    | synaptotagmin IV                              | AV336547  | 3.6476 | 11.7673 | -8.1197 |
| 1418395_at   | Slc47a1 | solute carrier family 47, member 1            | NM_026183 | 2.6619 | 10.7989 | -8.1370 |
| 1456228_x_at | Mbp     | myelin basic protein                          | AV328388  | 4.4491 | 12.7749 | -8.3258 |
| 1422643_at   | Moxd1   | monooxygenase, DBH-like 1                     | NM_021509 | 4.1239 | 12.5290 | -8.4051 |
| 1435190_at   | Chl1    | cell adhesion molecule with homology to L1CAM | BB378591  | 3.8732 | 12.3640 | -8.4908 |
| 1433532_a_at | Mbp     | myelin basic protein                          | AI323506  | 4.1952 | 13.0290 | -8.8338 |
|              |         |                                               |           |        |         |         |
|              |         |                                               |           |        |         |         |

### Comparison of gene expression between glioma cells GL26A1 and GL26 cells (Affymetrix Gene Chip Data)

| Affymetrix Probe identifier | Gene Symbol   | Description                                                                                    | GenBank   | GL26A1 expression | GL26 expression | Fold Change (log <sub>2</sub> ) |
|-----------------------------|---------------|------------------------------------------------------------------------------------------------|-----------|-------------------|-----------------|---------------------------------|
| 1436751_at                  | Wee2          | WEE1 homolog 2 (S. pombe)                                                                      | BG070796  | 7.7423            | 3.2882          | 4.4542                          |
| 1425923_at                  | Mycn          | v-myc myelocytomatosis viral related oncogene, neuroblastoma derived (avian)                   | M36277    | 11.3128           | 7.1952          | 4.1176                          |
| 1440774_x_at                | Wee2          | WEE1 homolog 2 (S. pombe)                                                                      | BB061859  | 6.1404            | 3.5815          | 2.5589                          |
| 1435162_at                  | Prkg2         | protein kinase, cGMP-dependent, type II                                                        | BB823350  | 9.6126            | 7.3208          | 2.2918                          |
| 1450663_at                  | Thbs2         | thrombospondin 2                                                                               | NM_011581 | 11.2181           | 9.1056          | 2.1125                          |
| 1435460_at                  | Prkg2         | protein kinase, cGMP-dependent, type II                                                        | BB363188  | 9.8761            | 7.7882          | 2.0879                          |
| 1450781_at                  | Hmga2         | high mobility group AT-hook 2                                                                  | X58380    | 10.5025           | 8.4149          | 2.0876                          |
| 1423340_at                  | Tfap2b        | transcription factor AP-2 beta                                                                 | AV334599  | 6.6941            | 4.6127          | 2.0813                          |
| 1427683_at                  | Egr2          | early growth response 2                                                                        | X06746    | 7.8900            | 5.8632          | 2.0269                          |
| 1450916_at                  | Stau2         | staufer (RNA binding protein) homolog 2 (Drosophila)                                           | AI843206  | 6.5499            | 4.5289          | 2.0209                          |
| 1434447_at                  | Met           | met proto-oncogene                                                                             | BG060788  | 6.4898            | 4.4990          | 1.9909                          |
| 1447862_x_at                | Thbs2         | thrombospondin 2                                                                               | BB233297  | 10.4994           | 8.5551          | 1.9443                          |
| 1425533_a_at                | Stau2         | staufer (RNA binding protein) homolog 2 (Drosophila)                                           | AJ244015  | 7.7400            | 5.7980          | 1.9420                          |
| 1427682_a_at                | Egr2          | early growth response 2                                                                        | X06746    | 7.6236            | 5.8041          | 1.8194                          |
| 1422851_at                  | Hmga2         | high mobility group AT-hook 2                                                                  | X58380    | 10.7807           | 8.9731          | 1.8076                          |
| 1425538_x_at                | Ceacam1       | carcinoembryonic antigen-related cell adhesion molecule 1                                      | BC016891  | 6.6696            | 4.9195          | 1.7501                          |
| 1418296_at                  | Fxyd5         | FXFD domain-containing ion transport regulator 5                                               | NM_008761 | 8.8176            | 7.1002          | 1.7173                          |
| 1418726_a_at                | Tnnt2         | troponin T2, cardiac                                                                           | NM_011619 | 6.3197            | 4.6056          | 1.7141                          |
| 1425675_s_at                | Ceacam1       | carcinoembryonic antigen-related cell adhesion molecule 1                                      | M77196    | 5.5419            | 3.8342          | 1.7076                          |
| 1450780_s_at                | Hmga2         | high mobility group AT-hook 2                                                                  | X58380    | 10.9008           | 9.2027          | 1.6981                          |
| 1428834_at                  | Dusp4         | dual specificity phosphatase 4                                                                 | AK012530  | 8.7298            | 7.0437          | 1.6862                          |
| 1425427_at                  | LOC639910     | 2-cell-stage, variable group, member 1-like                                                    | AF067058  | 5.7715            | 4.1035          | 1.6680                          |
| 1450716_at                  | Adamts1       | a disintegrin-like and metalloproteinase (reprolysin type) with thrombospondin type 1 motif, 1 | D67076    | 10.7011           | 9.0477          | 1.6534                          |
| 1422571_at                  | Thbs2         | thrombospondin 2                                                                               | NM_011581 | 12.0662           | 10.4400         | 1.6262                          |
| 1438672_at                  | Parvb         | parvin, beta                                                                                   | BI134721  | 9.1870            | 7.5633          | 1.6238                          |
| 1417837_at                  | Phlda2        | pleckstrin homology-like domain, family A, member 2                                            | NM_009434 | 7.9171            | 6.3197          | 1.5974                          |
| 1459878_a_at                | A430107O13Rik | RIKEN cDNA A430107O13 gene                                                                     | AI195854  | 6.9355            | 5.3765          | 1.5590                          |
| 1455160_at                  | 2610203C20Rik | RIKEN cDNA 2610203C20 gene                                                                     | BM220421  | 8.4548            | 6.9332          | 1.5216                          |
| 1439348_at                  | S100a10       | S100 calcium binding protein A10 (calpactin)                                                   | BB450829  | 8.5150            | 7.0073          | 1.5077                          |
| 1460378_a_at                | Tes           | testis derived transcript                                                                      | BC010465  | 9.1238            | 7.6248          | 1.4990                          |
| 1419080_at                  | Gdnf          | glial cell line derived neurotrophic factor                                                    | NM_010275 | 8.5348            | 7.0409          | 1.4939                          |
| 1437270_a_at                | Clcf1         | cardiotrophin-like cytokine factor 1                                                           | BB825816  | 6.5424            | 5.0544          | 1.4880                          |
| 1424246_a_at                | Tes           | testis derived transcript                                                                      | BC003808  | 9.6538            | 8.1710          | 1.4828                          |
| 1436465_at                  | Klh1          | kelch-like 1 (Drosophila)                                                                      | BE947032  | 5.4745            | 4.0372          | 1.4373                          |
| 1453158_at                  | Zfp622        | zinc finger protein 622                                                                        | AK004048  | 5.0107            | 3.5815          | 1.4293                          |
| 1447948_at                  | A430107O13Rik | RIKEN cDNA A430107O13 gene                                                                     | AI195854  | 6.8688            | 5.4443          | 1.4245                          |
| 1449146_at                  | Notch4        | notch 4                                                                                        | NM_010929 | 7.0719            | 5.6564          | 1.4155                          |
| 1436384_at                  | Rps10         | ribosomal protein S10                                                                          | AV283093  | 7.4927            | 6.0773          | 1.4154                          |
| 1421034_a_at                | Il4ra         | interleukin 4 receptor, alpha                                                                  | NM_010557 | 7.4447            | 6.0489          | 1.3957                          |
| 1427630_x_at                | Ceacam1       | carcinoembryonic antigen-related cell adhesion molecule 1                                      | X67278    | 6.0489            | 4.6674          | 1.3815                          |
| 1448982_at                  | Klk6          | kallikrein related-peptidase 6                                                                 | NM_011177 | 5.7781            | 4.3997          | 1.3784                          |
| 1455796_x_at                | Olfm1         | olfactomedin 1                                                                                 | BB549310  | 9.4602            | 8.0850          | 1.3752                          |
| 1435670_at                  | Tfap2b        | transcription factor AP-2 beta                                                                 | AV237028  | 6.5605            | 5.1918          | 1.3687                          |
| 1443394_at                  |               |                                                                                                | BG060698  | 7.1687            | 5.8070          | 1.3617                          |

|              |               |                                                                                        |           |         |        |        |
|--------------|---------------|----------------------------------------------------------------------------------------|-----------|---------|--------|--------|
| 1419735_at   | Csn3          | casein kappa                                                                           | NM_007786 | 7.1586  | 5.7988 | 1.3598 |
| 1436627_at   | Airn          | antisense Igf2r RNA                                                                    | BB368203  | 8.0152  | 6.6564 | 1.3588 |
| 1449590_a_at | Mras          | muscle and microspikes RAS                                                             | AB004879  | 7.5295  | 6.1744 | 1.3551 |
| 1439807_at   | Tmem74        | transmembrane protein 74                                                               | BB816169  | 6.3554  | 5.0107 | 1.3446 |
| 1443961_at   |               |                                                                                        | BG071029  | 8.3071  | 6.9758 | 1.3313 |
| 1429459_at   | Sema3d        | sema domain, immunoglobulin domain (Ig), short basic domain, secreted, (semaphorin) 3D | BB499147  | 8.2755  | 6.9450 | 1.3306 |
| 1448789_at   | Aldh1a3       | aldehyde dehydrogenase family 1, subfamily A3                                          | AF253409  | 8.6982  | 7.3681 | 1.3300 |
| 1433863_at   | Btf3          | basic transcription factor 3                                                           | AW556975  | 6.0489  | 4.7207 | 1.3282 |
| 1457823_at   | Cyr61         | cysteine rich protein 61                                                               | BB533736  | 9.6929  | 8.3687 | 1.3242 |
| 1417128_at   | Plekho1       | pleckstrin homology domain containing, family O member 1                               | NM_023320 | 9.1621  | 7.8556 | 1.3065 |
| 1458241_at   |               |                                                                                        | BM055681  | 7.4196  | 6.1166 | 1.3031 |
| 1455238_at   | Mum11         | melanoma associated antigen (mutated) 1-like 1                                         | BB103233  | 6.4073  | 5.1060 | 1.3013 |
| 1426562_a_at | Olfm1         | olfactomedin 1                                                                         | BE952082  | 8.6118  | 7.3117 | 1.3000 |
| 1439651_at   |               |                                                                                        | AV370006  | 6.4574  | 5.1657 | 1.2917 |
| 1460579_at   | Dnpep         | aspartyl aminopeptidase                                                                | BQ085436  | 5.8632  | 4.5719 | 1.2912 |
| 1459681_at   |               |                                                                                        | AI451554  | 6.1198  | 4.8289 | 1.2909 |
| 1434959_at   | Dhh           | desert hedgehog                                                                        | AV367068  | 9.4795  | 8.1892 | 1.2903 |
| 1425784_a_at | Olfm1         | olfactomedin 1                                                                         | D78264    | 11.1275 | 9.8380 | 1.2895 |
| 1420150_at   | Spsb1         | splA/ryanodine receptor domain and SOCS box containing 1                               | AI596360  | 6.9566  | 5.6689 | 1.2877 |
| 1438076_at   | Rpl30         | ribosomal protein L30                                                                  | BB283415  | 8.3319  | 7.0462 | 1.2856 |
| 1425530_a_at | Stx3          | syntaxin 3                                                                             | D29800    | 6.8455  | 5.5610 | 1.2846 |
| 1459146_at   | Mapk6         | mitogen-activated protein kinase 6                                                     | BB282686  | 5.0703  | 3.7880 | 1.2823 |
| 1450852_s_at | F2r           | coagulation factor II (thrombin) receptor                                              | BQ173958  | 11.0920 | 9.8236 | 1.2684 |
| 1416069_at   | Pfkp          | phosphofructokinase, platelet                                                          | NM_019703 | 10.3814 | 9.1332 | 1.2482 |
| 1429169_at   | Rbm3          | RNA binding motif protein 3                                                            | AK011224  | 6.5881  | 5.3430 | 1.2451 |
| 1434881_s_at | Kctd12        | potassium channel tetramerisation domain containing 12                                 | BM220945  | 5.0107  | 3.7700 | 1.2407 |
| 1442340_x_at | Cyr61         | cysteine rich protein 61                                                               | BB533736  | 9.6621  | 8.4280 | 1.2341 |
| 1456684_at   | Tmem74        | transmembrane protein 74                                                               | BB710790  | 8.8272  | 7.5982 | 1.2291 |
| 1416041_at   | Sgk1          | serum/glucocorticoid regulated kinase 1                                                | NM_011361 | 8.7611  | 7.5356 | 1.2255 |
| 1460682_s_at |               |                                                                                        | BC024320  | 6.6051  | 5.3806 | 1.2245 |
| 1416503_at   | Lxn           | latexin                                                                                | NM_016753 | 10.8682 | 9.6448 | 1.2234 |
| 1433715_at   | Cpne7         | copine VII                                                                             | BB426433  | 6.8893  | 5.6689 | 1.2204 |
| 1426037_a_at | Rgs16         | regulator of G-protein signaling 16                                                    | U94828    | 9.9603  | 8.7433 | 1.2170 |
| 1438764_at   | Anxa7         | annexin A7                                                                             | AV333182  | 8.1230  | 6.9115 | 1.2114 |
| 1446196_at   | Hmga2         | high mobility group AT-hook 2                                                          | BB105328  | 6.3554  | 5.1477 | 1.2076 |
| 1446914_at   | C80425        | expressed sequence C80425                                                              | C80425    | 5.3765  | 4.1689 | 1.2076 |
| 1438929_at   |               |                                                                                        | BB168595  | 6.3015  | 5.1036 | 1.1979 |
| 1453060_at   | Rgs8          | regulator of G-protein signaling 8                                                     | AK018337  | 6.2019  | 5.0107 | 1.1912 |
| 1437534_at   |               |                                                                                        | AU019880  | 5.8579  | 4.6674 | 1.1905 |
| 1455904_at   |               |                                                                                        | BI650268  | 9.5677  | 8.3824 | 1.1853 |
| 1453189_at   | Ube2i         | ubiquitin-conjugating enzyme E2I                                                       | BM242612  | 8.0510  | 6.8662 | 1.1848 |
| 1418105_at   | Stmn4         | stathmin-like 4                                                                        | NM_019675 | 8.6518  | 7.4693 | 1.1825 |
| 1425534_at   | Stau2         | staufer (RNA binding protein) homolog 2 (Drosophila)                                   | AJ244015  | 5.1508  | 3.9701 | 1.1807 |
| 1459884_at   | Cox7c         | cytochrome c oxidase, subunit VIIc                                                     | AA190297  | 5.6970  | 4.5164 | 1.1806 |
| 1427733_a_at | Nfia          | nuclear factor I/A                                                                     | D90176    | 6.0777  | 4.9122 | 1.1655 |
| 1438590_at   | Rapgef3       | rap guanine nucleotide exchange factor (GEF) 3                                         | BB280100  | 5.7515  | 4.5865 | 1.1650 |
| 1418393_a_at | Itga7         | integrin alpha 7                                                                       | NM_008398 | 7.7316  | 6.5730 | 1.1586 |
| 1455878_at   | 2700023E23Rik | RIKEN cDNA 2700023E23 gene                                                             | BB822655  | 9.4428  | 8.2894 | 1.1533 |
| 1450791_at   | Nppb          | natriuretic peptide type B                                                             | NM_008726 | 8.5694  | 7.4168 | 1.1526 |
| 1440302_at   | Slc25a3       | solute carrier family 25 (mitochondrial carrier, phosphate carrier), member 3          | AV221818  | 6.0239  | 4.8719 | 1.1520 |
| 1440882_at   | Lrp8          | low density lipoprotein receptor-related protein 8, apolipoprotein e receptor          | BB750940  | 8.6743  | 7.5226 | 1.1518 |
| 1438824_at   | Slc20a1       | solute carrier family 20, member 1                                                     | BB465699  | 5.4443  | 4.2966 | 1.1477 |
| 1437180_at   | Snrnp48       | small nuclear ribonucleoprotein 48 (U11/U12)                                           | BE824567  | 7.7871  | 6.6421 | 1.1450 |
| 1435333_at   | Ndufaf4       | NADH dehydrogenase (ubiquinone) 1 alpha subcomplex, assembly factor 4                  | AV156568  | 9.0487  | 7.9040 | 1.1447 |
| 1419665_a_at | Nupr1         | nuclear protein 1                                                                      | NM_019738 | 10.3669 | 9.2293 | 1.1376 |
| 1458193_at   | Pmp2          | peripheral myelin protein 2                                                            | AV278565  | 6.3980  | 5.2685 | 1.1295 |
| 1452291_at   | Arap2         | ArfGAP with RhoGAP domain, ankyrin repeat and PH domain 2                              | AV375176  | 7.4248  | 6.3015 | 1.1233 |
| 1457613_at   |               |                                                                                        | BI788635  | 5.1907  | 4.0685 | 1.1222 |
| 1437759_at   | Pfkp          | phosphofructokinase, platelet                                                          | AV343511  | 5.5508  | 4.4293 | 1.1214 |

|              |               |                                                                              |           |         |         |        |
|--------------|---------------|------------------------------------------------------------------------------|-----------|---------|---------|--------|
| 1434413_at   | Igf1          | insulin-like growth factor 1                                                 | BG092677  | 5.3765  | 4.2583  | 1.1182 |
| 1451452_a_at | Rgs16         | regulator of G-protein signaling 16                                          | U72881    | 7.6432  | 6.5258  | 1.1174 |
| 1442512_at   | Gm3426        | predicted gene 3426                                                          | BB831345  | 6.0047  | 4.8924  | 1.1123 |
| 1448562_at   | Upp1          | uridine phosphorylase 1                                                      | NM_009477 | 7.3117  | 6.2005  | 1.1113 |
| 1457970_at   | Actr1a        | ARP1 actin-related protein 1A, centractin alpha                              | W91599    | 5.0107  | 3.9024  | 1.1083 |
| 1418936_at   | Maff          | v-maf musculoaponeurotic fibrosarcoma oncogene family, protein F (avian)     | BC022952  | 8.2362  | 7.1280  | 1.1082 |
| 1446782_at   | Lins          | lines homolog (Drosophila)                                                   | BB275502  | 5.3414  | 4.2333  | 1.1081 |
| 1437308_s_at | F2r           | coagulation factor II (thrombin) receptor                                    | AV024285  | 11.5671 | 10.4595 | 1.1076 |
| 1457390_at   |               |                                                                              | BG069557  | 6.0270  | 4.9195  | 1.1075 |
| 1437359_at   | Rnps1         | ribonucleic acid binding protein S1                                          | BI793607  | 7.7518  | 6.6473  | 1.1045 |
| 1427102_at   | Sln4          | schlafen 4                                                                   | AF099975  | 10.2295 | 9.1259  | 1.1036 |
| 1448507_at   | Efhd1         | EF hand domain containing 1                                                  | BC019531  | 8.1508  | 7.0503  | 1.1005 |
| 1439015_at   | Gfra1         | glial cell line derived neurotrophic factor family receptor alpha 1          | AV221299  | 7.1037  | 6.0047  | 1.0990 |
| 1459885_s_at | Cox7c         | cytochrome c oxidase, subunit VIIc                                           | AA190297  | 7.5794  | 6.4845  | 1.0949 |
| 1460550_at   | Mtmr11        | myotubularin related protein 11                                              | BE952757  | 5.9590  | 4.8648  | 1.0942 |
| 1442305_at   | Gtpbp2        | GTP binding protein 2                                                        | AI849247  | 8.0542  | 6.9643  | 1.0899 |
| 1435934_at   | Ndubf1        | NADH dehydrogenase (ubiquinone) 1, alpha/beta subcomplex, 1                  | AI643884  | 5.9357  | 4.8467  | 1.0890 |
| 1423854_a_at | Rasl11b       | RAS-like, family 11, member B                                                | BC008101  | 9.5897  | 8.5057  | 1.0840 |
| 1420798_s_at |               |                                                                              | NM_054072 | 6.1807  | 5.0970  | 1.0838 |
| 1449403_at   | Pde9a         | phosphodiesterase 9A                                                         | NM_008804 | 5.6352  | 4.5566  | 1.0786 |
| 1451634_at   | Airn          | antisense Igf2r RNA                                                          | BC009123  | 7.4625  | 6.3902  | 1.0723 |
| 1429729_at   | 1500004A13Rik | RIKEN cDNA 1500004A13 gene                                                   | BB462518  | 5.3054  | 4.2333  | 1.0721 |
| 1456623_at   | Tpm1          | tropomyosin 1, alpha                                                         | BM232388  | 6.8564  | 5.7878  | 1.0686 |
| 1439041_at   | Slc39a10      | solute carrier family 39 (zinc transporter), member 10                       | BM239325  | 7.7674  | 6.7049  | 1.0624 |
| 1434390_at   | AI503316      | expressed sequence AI503316                                                  | BB200448  | 7.6309  | 6.5700  | 1.0609 |
| 1424951_at   | Baiap2l1      | BAI1-associated protein 2-like 1                                             | BC015459  | 5.1918  | 4.1329  | 1.0589 |
| 1420981_a_at | Lmo4          | LIM domain only 4                                                            | NM_010723 | 10.7488 | 9.6900  | 1.0588 |
| 1437271_at   | Clcf1         | cardiotrophin-like cytokine factor 1                                         | BB825816  | 6.3376  | 5.2794  | 1.0582 |
| 1425880_x_at | Zfp352        | zinc finger protein 352                                                      | AF290196  | 5.8810  | 4.8229  | 1.0581 |
| 1422123_s_at |               |                                                                              | NM_011926 | 6.5541  | 5.4985  | 1.0556 |
| 1448058_s_at | Bub3          | budding uninhibited by benzimidazoles 3 homolog (S. cerevisiae)              | BB654880  | 6.2200  | 5.1652  | 1.0548 |
| 1437204_a_at | Tcf25         | transcription factor 25 (basic helix-loop-helix)                             | BE988778  | 7.9747  | 6.9199  | 1.0547 |
| 1424772_at   | H2afj         | H2A histone family, member J                                                 | BF661121  | 7.3681  | 6.3139  | 1.0543 |
| 1447504_at   |               |                                                                              | AI593417  | 5.7327  | 4.6806  | 1.0521 |
| 1438253_at   | Ssh1          | slingshot homolog 1 (Drosophila)                                             | BE954973  | 6.1056  | 5.0544  | 1.0512 |
| 1435381_at   | Atat1         | alpha tubulin acetyltransferase 1                                            | BI134316  | 6.2831  | 5.2328  | 1.0503 |
| 1457383_at   |               |                                                                              | BM222431  | 5.4443  | 4.3943  | 1.0500 |
| 1440339_at   | Enpp1         | ectonucleotide pyrophosphatase/phosphodiesterase 1                           | AW910504  | 7.1263  | 6.0777  | 1.0485 |
| 1442235_at   | Plagl2        | pleiomorphic adenoma gene-like 2                                             | BF584971  | 6.3729  | 5.3252  | 1.0476 |
| 1429668_at   | Pou4f1        | POU domain, class 4, transcription factor 1                                  | BB465134  | 7.0061  | 5.9590  | 1.0471 |
| 1455048_at   | Igsf3         | immunoglobulin superfamily, member 3                                         | BB484576  | 8.5732  | 7.5278  | 1.0454 |
| 1446761_at   | D8Erttd56e    | DNA segment, Chr 8, ERATO D0156, expressed                                   | C77659    | 5.5261  | 4.4814  | 1.0446 |
| 1451383_a_at | Chuk          | conserved helix-loop-helix ubiquitous kinase                                 | BC018243  | 7.3042  | 6.2600  | 1.0443 |
| 1438816_at   | Ahctf1        | AT hook containing transcription factor 1                                    | BM247201  | 6.6129  | 5.5708  | 1.0420 |
| 1425087_at   | 2310003F16Rik | RIKEN cDNA 2310003F16 gene                                                   | BC021588  | 5.0698  | 4.0292  | 1.0406 |
| 1417801_a_at | Ppfibp2       | PTPRF interacting protein, binding protein 2 (liprin beta 2)                 | NM_008905 | 6.9682  | 5.9279  | 1.0403 |
| 1427320_at   | Copg2as2      | coatamer protein complex, subunit gamma 2, antisense 2                       | BB316578  | 5.3765  | 4.3365  | 1.0400 |
| 1438690_at   | Tyms          | thymidylate synthase                                                         | BM068975  | 5.9119  | 4.8719  | 1.0400 |
| 1432509_at   | 5033430I15Rik | RIKEN cDNA 5033430I15 gene                                                   | AK017206  | 6.6801  | 5.6402  | 1.0398 |
| 1423077_at   | Snx9          | sorting nexin 9                                                              | BB703513  | 9.2437  | 8.2040  | 1.0397 |
| 1425220_x_at | AF067061      | cDNA sequence AF067061                                                       | AF067062  | 8.0863  | 7.0503  | 1.0360 |
| 1460062_at   | Plekhh2       | pleckstrin homology domain containing, family H (with MyTH4 domain) member 2 | AW122265  | 6.3015  | 5.2685  | 1.0330 |
| 1420760_s_at | Ndr1          | N-myc downstream regulated gene 1                                            | NM_008681 | 5.4108  | 4.3893  | 1.0216 |
| 1456495_s_at | Osbpl6        | oxysterol binding protein-like 6                                             | BG070848  | 5.5196  | 4.4990  | 1.0206 |
| 1425092_at   | Cdh10         | cadherin 10                                                                  | AF183946  | 6.6307  | 5.6110  | 1.0197 |
| 1445669_at   | Spry4         | sprouty homolog 4 (Drosophila)                                               | BB080456  | 7.6064  | 6.5872  | 1.0192 |
| 1428888_at   | Tmem33        | transmembrane protein 33                                                     | AW495283  | 5.0544  | 4.0372  | 1.0173 |
| 1447188_at   |               |                                                                              | AU016662  | 5.9820  | 4.9657  | 1.0163 |
| 1424470_a_at | Rapgef3       | Rap guanine nucleotide exchange factor (GEF) 3                               | BC020532  | 7.5200  | 6.5044  | 1.0156 |



|              |               |                                                                                          |           |         |         |         |
|--------------|---------------|------------------------------------------------------------------------------------------|-----------|---------|---------|---------|
| 1442095_at   | Asxl3         | additional sex combs like 3 (Drosophila)                                                 | BB528113  | 8.5348  | 7.5226  | 1.0122  |
| 1436798_at   | Rpl9          | ribosomal protein L9                                                                     | AV110787  | 7.4693  | 6.4584  | 1.0109  |
| 1445626_at   |               |                                                                                          | AI426376  | 7.0173  | 6.0081  | 1.0092  |
| 1454745_at   | Arhgap29      | Rho GTPase activating protein 29                                                         | BG074320  | 5.7781  | 4.7704  | 1.0077  |
| 1426243_at   | Cth           | cystathionase (cystathionine gamma-lyase)                                                | BC019483  | 9.9030  | 8.8954  | 1.0075  |
| 1456493_at   | Sp110         | Sp110 nuclear body protein                                                               | BG072319  | 6.4836  | 5.4771  | 1.0065  |
| 1435316_at   | Psm6          | proteasome (prosome, macropain) subunit, alpha type 6                                    | AA189256  | 5.1658  | 4.1600  | 1.0058  |
| 1428730_at   | Krit1         | KRIT1, ankyrin repeat containing                                                         | BI793814  | 5.3765  | 4.3727  | 1.0038  |
| 1446417_at   |               |                                                                                          | AW553625  | 5.6689  | 4.6674  | 1.0014  |
| 1448773_at   |               |                                                                                          | AK014593  | 7.0284  | 6.0270  | 1.0014  |
| 1424857_a_at | Trim34a       | tripartite motif-containing 34A                                                          | AF220142  | 8.2921  | 9.2936  | -1.0015 |
| 1451461_a_at | Aldoc         | aldolase C, fructose-bisphosphate                                                        | BC008184  | 8.0217  | 9.0248  | -1.0031 |
| 1449296_a_at | Cnp           | 2',3'-cyclic nucleotide 3' phosphodiesterase                                             | M58045    | 8.2568  | 9.2615  | -1.0047 |
| 1454032_at   | Neto2         | neuropilin (NRP) and tolloid (TLL)-like 2                                                | AK017458  | 5.8382  | 6.8439  | -1.0058 |
| 1456539_at   |               |                                                                                          | AV020412  | 7.1383  | 8.1457  | -1.0074 |
| 1452294_at   | Pcdh1         | protocadherin 1                                                                          | AK008111  | 5.1918  | 6.2005  | -1.0087 |
| 1433716_x_at | Gfra2         | glial cell line derived neurotrophic factor family receptor alpha 2                      | BB284482  | 8.9874  | 9.9976  | -1.0102 |
| 1454838_s_at | Pkdcc         | protein kinase domain containing, cytoplasmic                                            | BB323985  | 4.3306  | 5.3414  | -1.0108 |
| 1443882_at   | Slc26a2       | solute carrier family 26 (sulfate transporter), member 2                                 | BI150812  | 10.4962 | 11.5071 | -1.0108 |
| 1453721_a_at | Slc31a2       | solute carrier family 31, member 2                                                       | AK015878  | 7.7518  | 8.7653  | -1.0135 |
| 1426960_a_at | Fa2h          | fatty acid 2-hydroxylase                                                                 | BM118638  | 4.9195  | 5.9357  | -1.0162 |
| 1456833_at   | Gpr17         | G protein-coupled receptor 17                                                            | BB353220  | 4.3588  | 5.3753  | -1.0165 |
| 1460449_at   | Anks1b        | ankyrin repeat and sterile alpha motif domain containing 1B                              | BQ174247  | 4.0372  | 5.0544  | -1.0173 |
| 1421594_a_at | Syt12         | synaptotagmin-like 2                                                                     | NM_031394 | 5.5196  | 6.5370  | -1.0173 |
| 1424113_at   | Lamb1         | laminin B1                                                                               | BG970109  | 8.5707  | 9.5915  | -1.0208 |
| 1416749_at   | Htra1         | HtrA serine peptidase 1                                                                  | NM_019564 | 6.9996  | 8.0217  | -1.0221 |
| 1433626_at   | Plscr4        | phospholipid scramblase 4                                                                | BB826296  | 7.8910  | 8.9155  | -1.0245 |
| 1448890_at   | Klf2          | Kruppel-like factor 2 (lung)                                                             | NM_008452 | 6.6564  | 7.6809  | -1.0245 |
| 1444564_at   | Apod          | apolipoprotein D                                                                         | AV332635  | 6.6421  | 7.6668  | -1.0248 |
| 1450696_at   | Psm6          | proteasome (prosome, macropain) subunit, beta type 9 (large multifunctional peptidase 2) | NM_013585 | 9.3004  | 10.3278 | -1.0273 |
| 1417071_s_at | Cyp4v3        | cytochrome P450, family 4, subfamily v, polypeptide 3                                    | NM_133969 | 5.0177  | 6.0489  | -1.0312 |
| 1437863_at   | Bche          | butyrylcholinesterase                                                                    | BB667762  | 5.3414  | 6.3729  | -1.0315 |
| 1440815_x_at |               |                                                                                          | BB099075  | 8.0105  | 9.0424  | -1.0318 |
| 1417497_at   | Cp            | ceruloplasmin                                                                            | BB332449  | 6.6275  | 7.6610  | -1.0335 |
| 1437492_at   | Mkx           | mohawk homeobox                                                                          | BB021019  | 6.2476  | 7.2818  | -1.0342 |
| 1417101_at   | Hspa2         | heat shock protein 2                                                                     | BC004714  | 6.1607  | 7.1952  | -1.0345 |
| 1422600_at   | Rasgrf1       | RAS protein-specific guanine nucleotide-releasing factor 1                               | NM_011245 | 4.2702  | 5.3054  | -1.0352 |
| 1448727_at   | Tle6          | transducin-like enhancer of split 6, homolog of Drosophila E(spl)                        | NM_053254 | 7.5884  | 8.6253  | -1.0369 |
| 1448181_at   | Klf15         | Kruppel-like factor 15                                                                   | BC013486  | 4.2333  | 5.2709  | -1.0376 |
| 1429448_s_at | Tet1          | tet methylcytosine dioxygenase 1                                                         | BM240219  | 5.6402  | 6.6786  | -1.0384 |
| 1445468_at   | Gm10451       | predicted gene 10451                                                                     | BB812219  | 5.6402  | 6.6802  | -1.0399 |
| 1424716_at   | Retsat        | retinol saturase (all-trans-retinol 13,14-reductase)                                     | BB775176  | 6.5058  | 7.5478  | -1.0420 |
| 1436962_at   | Prdm6         | PR domain containing 6                                                                   | AV303905  | 5.6970  | 6.7391  | -1.0421 |
| 1423266_at   | 2810405K02Rik | RIKEN cDNA 2810405K02 gene                                                               | AI836168  | 8.5694  | 9.6126  | -1.0433 |
| 1435749_at   | Gda           | guanine deaminase                                                                        | AW911807  | 8.7275  | 9.7718  | -1.0443 |
| 1431004_at   | Loxl2         | lysyl oxidase-like 2                                                                     | AI415741  | 5.8632  | 6.9094  | -1.0462 |
| 1455494_at   | Col1a1        | collagen, type I, alpha 1                                                                | BI794771  | 6.2392  | 7.2873  | -1.0481 |
| 1454901_at   | Ypel2         | yippee-like 2 (Drosophila)                                                               | BG069663  | 8.6779  | 9.7271  | -1.0493 |
| 1426301_at   | Alcam         | activated leukocyte cell adhesion molecule                                               | U95030    | 5.3054  | 6.3554  | -1.0500 |
| 1454685_at   | Gpr146        | G protein-coupled receptor 146                                                           | BQ177047  | 4.3588  | 5.4108  | -1.0521 |
| 1452583_s_at | Galm          | galactose mutarotase                                                                     | AV307219  | 7.2562  | 8.3091  | -1.0529 |
| 1425894_at   | Mrgprf        | MAS-related GPR, member F                                                                | BC019711  | 8.1120  | 9.1654  | -1.0534 |
| 1423959_at   | Ropn1l        | ropporin 1-like                                                                          | AF305427  | 5.0233  | 6.0777  | -1.0544 |
| 1436678_at   | Sgcb          | sarcoglycan, beta (dystrophin-associated glycoprotein)                                   | AI844814  | 4.5566  | 5.6110  | -1.0544 |
| 1436624_at   | Dnm3          | dynamins 3                                                                               | BE988832  | 5.6110  | 6.6681  | -1.0571 |
| 1426092_a_at | Trim34a       | tripartite motif-containing 34A                                                          | AF220141  | 4.2333  | 5.2905  | -1.0572 |
| 1418686_at   | Oas1c         | 2'-5' oligoadenylate synthetase 1C                                                       | NM_033541 | 6.4574  | 7.5147  | -1.0573 |
| 1434634_at   | Gm166         | predicted gene 166                                                                       | BG866322  | 5.3744  | 6.4326  | -1.0582 |
| 1417635_at   | Spa17         | sperm autoantigenic protein 17                                                           | NM_011449 | 5.6744  | 6.7353  | -1.0608 |

|              |               |                                                                      |           |         |         |         |
|--------------|---------------|----------------------------------------------------------------------|-----------|---------|---------|---------|
| 1449405_at   | Tns1          | tensin 1                                                             | NM_027884 | 5.5508  | 6.6129  | -1.0621 |
| 1440799_s_at | Farp2         | FERM1, KNOX1 and pleckstrin domain protein 2                         | AI465173  | 5.5939  | 6.6564  | -1.0626 |
| 1423672_at   | Ttc30b        | tetratricopeptide repeat domain 30B                                  | BC026507  | 6.7353  | 7.8022  | -1.0670 |
| 1448943_at   | Nrp1          | neuropilin 1                                                         | AK011144  | 10.1355 | 11.2031 | -1.0675 |
| 1438037_at   | Herc6         | hect domain and RLD 6                                                | AW208668  | 8.8904  | 9.9618  | -1.0714 |
| 1417496_at   | Cp            | ceruloplasmin                                                        | BB332449  | 7.6236  | 8.6954  | -1.0718 |
| 1455582_at   | C1qtnf1       | C1q and tumor necrosis factor related protein 1                      | BI156044  | 9.1407  | 10.2125 | -1.0718 |
| 1417244_a_at | Irf7          | interferon regulatory factor 7                                       | NM_016850 | 7.9936  | 9.0658  | -1.0722 |
| 1440865_at   | Iitm6         | interferon induced transmembrane protein 6                           | BB193024  | 4.6674  | 5.7430  | -1.0756 |
| 1418191_at   | Usp18         | ubiquitin specific peptidase 18                                      | NM_011909 | 9.7602  | 10.8362 | -1.0760 |
| 1425016_at   | Ephb2         | Eph receptor B2                                                      | AV221401  | 4.8719  | 5.9492  | -1.0773 |
| 1423891_at   | Gstt3         | glutathione S-transferase, theta 3                                   | BC003903  | 5.3054  | 6.3832  | -1.0778 |
| 1427287_s_at | Itp2          | inositol 1,4,5-triphosphate receptor 2                               | BB216794  | 5.2936  | 6.3729  | -1.0793 |
| 1422567_at   | Fam129a       | family with sequence similarity 129, member A                        | NM_022018 | 6.0372  | 7.1176  | -1.0805 |
| 1417649_at   | Cdkn1c        | cyclin-dependent kinase inhibitor 1C (P57)                           | NM_009876 | 5.5314  | 6.6129  | -1.0814 |
| 1418534_at   | Fzd2          | frizzled homolog 2 (Drosophila)                                      | BB371406  | 6.0244  | 7.1072  | -1.0828 |
| 1452006_x_at | Zbtb8os       | zinc finger and BTB domain containing 8 opposite strand              | BB417508  | 4.0040  | 5.0880  | -1.0839 |
| 1433798_a_at | E330034G19Rik | RIKEN cDNA E330034G19 gene                                           | BG067232  | 4.5566  | 5.6409  | -1.0843 |
| 1424408_at   | Lims2         | LIM and senescent cell antigen like domains 2                        | BC010816  | 6.6129  | 7.6973  | -1.0844 |
| 1451679_at   | Arxes1        | adipocyte-related X-chromosome expressed sequence 1                  | BC016270  | 6.9566  | 8.0419  | -1.0853 |
| 1443290_at   |               |                                                                      | AV327713  | 4.2558  | 5.3414  | -1.0856 |
| 1429025_a_at | Hexim2        | hexamethylene bis-acetamide inducible 2                              | BB771130  | 6.6941  | 7.7805  | -1.0865 |
| 1419320_at   | Chst5         | carbohydrate (N-acetylglucosamine 6-O) sulfotransferase 5            | NM_019950 | 5.3204  | 6.4073  | -1.0869 |
| 1442902_at   | Qrich2        | glutamine rich 2                                                     | BG069309  | 4.9657  | 6.0539  | -1.0882 |
| 1422141_s_at | Csprs         | component of Sp100-rs                                                | NM_033616 | 6.0047  | 7.0968  | -1.0921 |
| 1431609_a_at | Acp5          | acid phosphatase 5, tartrate resistant                               | AK008391  | 3.9999  | 5.0970  | -1.0971 |
| 1457038_at   | Frem2         | Fras1 related extracellular matrix protein 2                         | BM201912  | 5.0544  | 6.1524  | -1.0980 |
| 1452349_x_at |               |                                                                      | AI481797  | 8.5047  | 9.6040  | -1.0994 |
| 1451611_at   | Pla2g16       | phospholipase A2, group XVI                                          | BC024581  | 7.4815  | 8.5845  | -1.1030 |
| 1439087_a_at | Pik3ip1       | phosphoinositide-3-kinase interacting protein 1                      | BB030508  | 7.1787  | 8.2828  | -1.1042 |
| 1436199_at   | Trim14        | tripartite motif-containing 14                                       | AU042532  | 7.3941  | 8.5003  | -1.1062 |
| 1424393_s_at | Adhfe1        | alcohol dehydrogenase, iron containing, 1                            | BC026584  | 5.1519  | 6.2602  | -1.1083 |
| 1421009_at   | Rsad2         | radical S-adenosyl methionine domain containing 2                    | BB741897  | 9.0459  | 10.1581 | -1.1122 |
| 1435911_s_at | Slc2a12       | solute carrier family 2 (facilitated glucose transporter), member 12 | BB043465  | 4.8229  | 5.9357  | -1.1128 |
| 1435265_at   | Fbxo32        | F-box protein 32                                                     | BF466929  | 6.2200  | 7.3328  | -1.1128 |
| 1439825_at   | Dtx3l         | deltex 3-like (Drosophila)                                           | BB705351  | 8.9416  | 10.0551 | -1.1135 |
| 1456328_at   | Bank1         | B cell scaffold protein with ankyrin repeats 1                       | AI451642  | 6.3902  | 7.5068  | -1.1166 |
| 1436098_at   | Bche          | butyrylcholinesterase                                                | BB667452  | 7.9141  | 9.0349  | -1.1208 |
| 1416468_at   | Aldh1a1       | aldehyde dehydrogenase family 1, subfamily A1                        | NM_013467 | 9.7850  | 10.9103 | -1.1253 |
| 1426971_at   | Uba7          | ubiquitin-like modifier activating enzyme 7                          | AK004894  | 5.8711  | 6.9986  | -1.1275 |
| 1449909_at   | 2010005H15Rik | RIKEN cDNA 2010005H15 gene                                           | NM_029733 | 5.1113  | 6.2501  | -1.1388 |
| 1428332_at   | Pik3ip1       | phosphoinositide-3-kinase interacting protein 1                      | AW556858  | 7.7674  | 8.9082  | -1.1409 |
| 1417951_at   | Eno3          | enolase 3, beta muscle                                               | NM_007933 | 8.6919  | 9.8332  | -1.1413 |
| 1418003_at   | 1190002H23Rik | RIKEN cDNA 1190002H23 gene                                           | NM_025427 | 11.4698 | 12.6152 | -1.1454 |
| 1430842_at   | 1500002F19Rik | RIKEN cDNA 1500002F19 gene                                           | AK005115  | 4.1689  | 5.3240  | -1.1552 |
| 1416371_at   | Apod          | apolipoprotein D                                                     | NM_007470 | 9.7311  | 10.8886 | -1.1575 |
| 1422596_at   | Nkain4        | Na <sup>+</sup> /K <sup>+</sup> transporting ATPase interacting 4    | NM_021426 | 6.5424  | 7.7020  | -1.1596 |
| 1421381_a_at | Col9a1        | collagen, type IX, alpha 1                                           | NM_007740 | 6.9332  | 8.0956  | -1.1624 |
| 1449065_at   | Acot1         | acyl-CoA thioesterase 1                                              | NM_012006 | 8.3946  | 9.5597  | -1.1651 |
| 1419207_at   | Zfp37         | zinc finger protein 37                                               | NM_009554 | 5.1134  | 6.2831  | -1.1697 |
| 1416232_at   | Olig2         | oligodendrocyte transcription factor 2                               | AB038697  | 6.7353  | 7.9068  | -1.1716 |
| 1437935_at   | Mei4          | meiosis-specific, MEI4 homolog (S. cerevisiae)                       | BB821151  | 4.9657  | 6.1404  | -1.1747 |
| 1429841_at   | Megf10        | multiple EGF-like-domains 10                                         | AK013855  | 8.0437  | 9.2240  | -1.1803 |
| 1417946_at   | Abhd3         | abhydrolase domain containing 3                                      | NM_134130 | 5.6531  | 6.8336  | -1.1805 |
| 1421921_at   | Serpina3m     | serine (or cysteine) peptidase inhibitor, clade A, member 3M         | BC011158  | 5.9820  | 7.1626  | -1.1806 |
| 1416666_at   | Serpine2      | serine (or cysteine) peptidase inhibitor, clade E, member 2          | NM_009255 | 5.8632  | 7.0438  | -1.1807 |
| 1435417_at   | AI464131      | expressed sequence AI464131                                          | BG063189  | 6.4545  | 7.6381  | -1.1837 |
| 1418310_a_at | Rlbp1         | retinaldehyde binding protein 1                                      | NM_020599 | 8.9035  | 10.0873 | -1.1838 |
| 1435792_at   |               |                                                                      | BB148221  | 7.7518  | 8.9373  | -1.1854 |
| 1428434_at   | Zcchc12       | zinc finger, CCHC domain containing 12                               | AK012833  | 6.4898  | 7.6809  | -1.1911 |
| 1433509_s_at | Reep1         | receptor accessory protein 1                                         | BQ174328  | 6.1198  | 7.3117  | -1.1919 |

|              |               |                                                                               |           |         |         |         |
|--------------|---------------|-------------------------------------------------------------------------------|-----------|---------|---------|---------|
| 1458585_at   |               |                                                                               | AI506321  | 4.1110  | 5.3054  | -1.1944 |
| 1429026_at   | Hexim2        | hexamethylene bis-acetamide inducible 2                                       | BB771130  | 8.0217  | 9.2211  | -1.1994 |
| 1436326_at   | Rora          | RAR-related orphan receptor alpha                                             | BB306272  | 4.9195  | 6.1198  | -1.2003 |
| 1455393_at   | Cp            | ceruloplasmin                                                                 | BB009037  | 7.9729  | 9.1766  | -1.2037 |
| 1418980_a_at | Cnp           | 2',3'-cyclic nucleotide 3' phosphodiesterase                                  | M58045    | 7.7111  | 8.9155  | -1.2044 |
| 1449558_at   | F8            | coagulation factor VIII                                                       | NM_007977 | 4.5433  | 5.7515  | -1.2083 |
| 1455425_at   | Tet1          | tet methylcytosine dioxygenase 1                                              | BG071655  | 5.3414  | 6.5530  | -1.2116 |
| 1418181_at   | Ptp4a3        | protein tyrosine phosphatase 4a3                                              | AK014601  | 5.1426  | 6.3554  | -1.2127 |
| 1436970_a_at | Pdgfrb        | platelet derived growth factor receptor, beta polypeptide                     | AA499047  | 4.3588  | 5.5812  | -1.2225 |
| 1458129_at   | Rora          | RAR-related orphan receptor alpha                                             | BB559501  | 5.0107  | 6.2392  | -1.2285 |
| 1421514_a_at | Scml2         | sex comb on midleg-like 2 (Drosophila)                                        | NM_133194 | 4.5113  | 5.7427  | -1.2314 |
| 1455165_at   | Rora          | RAR-related orphan receptor alpha                                             | BE335227  | 4.2333  | 5.4647  | -1.2314 |
| 1417495_x_at | Cp            | ceruloplasmin                                                                 | BB332449  | 9.5991  | 10.8328 | -1.2337 |
| 1416250_at   | Btg2          | B cell translocation gene 2, anti-proliferative                               | NM_007570 | 6.6564  | 7.9021  | -1.2457 |
| 1438404_at   | Rnf144a       | ring finger protein 144A                                                      | BB125272  | 8.5340  | 9.7877  | -1.2537 |
| 1443934_at   | 9230110C19Rik | RIKEN cDNA 9230110C19 gene                                                    | AI467525  | 7.8634  | 9.1212  | -1.2578 |
| 1435363_at   | Plekhg1       | pleckstrin homology domain containing, family G (with RhoGef domain) member 1 | BG073502  | 7.6454  | 8.9095  | -1.2642 |
| 1453377_at   | Sh2d4a        | SH2 domain containing 4A                                                      | AK008803  | 4.7725  | 6.0377  | -1.2652 |
| 1454169_a_at | Epsti1        | epithelial stromal interaction 1 (breast)                                     | AK017174  | 5.1918  | 6.4574  | -1.2656 |
| 1422072_a_at | Gstm6         | glutathione S-transferase, mu 6                                               | NM_008184 | 6.2392  | 7.5068  | -1.2676 |
| 1436058_at   | Rsad2         | radical S-adenosyl methionine domain containing 2                             | BB132493  | 10.1001 | 11.3681 | -1.2680 |
| 1419435_at   | Aox1          | aldehyde oxidase 1                                                            | NM_009676 | 5.2321  | 6.5005  | -1.2685 |
| 1423405_at   | Timp4         | tissue inhibitor of metalloproteinase 4                                       | BI788452  | 6.4737  | 7.7451  | -1.2714 |
| 1435748_at   | Gda           | guanine deaminase                                                             | AW911807  | 8.5920  | 9.8676  | -1.2756 |
| 1429241_at   | Nipal3        | NIPA-like domain containing 3                                                 | AK018640  | 5.4771  | 6.7535  | -1.2764 |
| 1442075_at   | AI314604      | expressed sequence AI314604                                                   | BE991175  | 4.7725  | 6.0489  | -1.2764 |
| 1422997_s_at |               |                                                                               | NM_134188 | 8.1457  | 9.4274  | -1.2817 |
| 1418825_at   | Irgm1         | immunity-related GTPase family M member 1                                     | NM_008326 | 10.0050 | 11.2867 | -1.2817 |
| 1437197_at   | Sorbs2        | sorbin and SH3 domain containing 2                                            | BB251748  | 7.1886  | 8.4739  | -1.2853 |
| 1442115_at   | Fam38b        | family with sequence similarity 38, member B                                  | BM220702  | 5.7123  | 6.9979  | -1.2856 |
| 1429798_s_at | Cmtm5         | CKLF-like MARVEL transmembrane domain containing 5                            | AV029626  | 8.1114  | 9.3978  | -1.2864 |
| 1455860_at   | Pigh          | phosphatidylinositol glycan anchor biosynthesis, class H                      | BB732183  | 5.5812  | 6.8688  | -1.2876 |
| 1448735_at   | Cp            | ceruloplasmin                                                                 | BB332449  | 7.1496  | 8.4383  | -1.2887 |
| 1448747_at   | Fbxo32        | F-box protein 32                                                              | AF441120  | 7.2588  | 8.5477  | -1.2889 |
| 1428650_at   | Tns1          | tensin 1                                                                      | AK003780  | 6.0047  | 7.2951  | -1.2904 |
| 1429947_a_at | Zbp1          | Z-DNA binding protein 1                                                       | AK008179  | 8.0161  | 9.3096  | -1.2935 |
| 1431057_a_at | Prss23        | protease, serine, 23                                                          | AK009847  | 5.4108  | 6.7079  | -1.2971 |
| 1428485_at   | Car12         | carbonic anhydrase 12                                                         | AK009873  | 5.3765  | 6.6757  | -1.2992 |
| 1433907_at   | Pknox2        | Pbx/knotted 1 homeobox 2                                                      | BQ175824  | 5.1357  | 6.4409  | -1.3051 |
| 1439864_at   | Ccdc40        | coiled-coil domain containing 40                                              | AV280756  | 6.9213  | 8.2266  | -1.3053 |
| 1430755_at   | 4930452G13Rik | RIKEN cDNA 4930452G13 gene                                                    | BF018617  | 7.0394  | 8.3455  | -1.3061 |
| 1449033_at   | Tnfrsf11b     | tumor necrosis factor receptor superfamily, member 11b (osteoprotegerin)      | AB013898  | 4.5566  | 5.8632  | -1.3066 |
| 1441881_x_at | Fam101a       | family with sequence similarity 101, member A                                 | BB458543  | 7.4935  | 8.8054  | -1.3119 |
| 1448470_at   | Fbp1          | fructose biphosphatase 1                                                      | NM_019395 | 3.8515  | 5.1641  | -1.3125 |
| 1433990_at   | Lhfp13        | lipoma HMGIC fusion partner-like 3                                            | BQ175687  | 5.8041  | 7.1176  | -1.3135 |
| 1426193_at   | Otos          | otospiralin                                                                   | AY078071  | 4.9217  | 6.2392  | -1.3175 |
| 1450783_at   | Ifit1         | interferon-induced protein with tetratricopeptide repeats 1                   | NM_008331 | 9.4775  | 10.7981 | -1.3206 |
| 1431050_at   | Rps6ka5       | ribosomal protein S6 kinase, polypeptide 5                                    | BE291900  | 4.7725  | 6.0931  | -1.3206 |
| 1433581_at   | 1190002N15Rik | RIKEN cDNA 1190002N15 gene                                                    | AV309085  | 7.2591  | 8.5845  | -1.3254 |
| 1453192_at   | Fam101a       | family with sequence similarity 101, member A                                 | AK014112  | 6.2582  | 7.5840  | -1.3258 |
| 1424123_at   | Mfsd7c        | major facilitator superfamily domain containing 7C                            | BC011209  | 5.4443  | 6.7709  | -1.3266 |
| 1417494_a_at | Cp            | ceruloplasmin                                                                 | BB332449  | 9.8596  | 11.1867 | -1.3271 |
| 1444769_at   | Tex9          | testis expressed gene 9                                                       | BB428851  | 4.6674  | 5.9951  | -1.3277 |
| 1417141_at   | Igtp          | interferon gamma induced GTPase                                               | NM_018738 | 10.3010 | 11.6295 | -1.3285 |
| 1430323_at   |               |                                                                               | AK006737  | 5.0072  | 6.3376  | -1.3304 |
| 1452087_at   | Epsti1        | epithelial stromal interaction 1 (breast)                                     | BF020640  | 6.0777  | 7.4083  | -1.3306 |
| 1454646_at   | Tcp11l2       | t-complex 11 (mouse) like 2                                                   | BM245221  | 7.5121  | 8.8430  | -1.3309 |
| 1418126_at   | Ccl5          | chemokine (C-C motif) ligand 5                                                | NM_013653 | 8.4011  | 9.7378  | -1.3367 |
| 1438331_at   |               |                                                                               | BB491630  | 5.8382  | 7.1764  | -1.3382 |
| 1441899_x_at | Bcan          | brevican                                                                      | BB335613  | 7.3117  | 8.6588  | -1.3470 |

|              |               |                                                                  |           |         |         |         |
|--------------|---------------|------------------------------------------------------------------|-----------|---------|---------|---------|
| 1448390_a_at | Dhrs3         | dehydrogenase/reductase (SDR family) member 3                    | NM_011303 | 5.9961  | 7.3477  | -1.3516 |
| 1434725_at   | Gramd1c       | GRAM domain containing 1C                                        | AV255657  | 4.9657  | 6.3197  | -1.3539 |
| 1458024_at   | Gm4876        | predicted gene 4876                                              | BB339393  | 4.0533  | 5.4108  | -1.3575 |
| 1435765_at   | E130114P18Rik | RIKEN cDNA E130114P18 gene                                       | BF464487  | 4.4990  | 5.8581  | -1.3592 |
| 1425394_at   | BC023105      | cDNA sequence BC023105                                           | BC023105  | 4.2516  | 5.6110  | -1.3595 |
| 1428303_at   | Btbd17        | BTB (POZ) domain containing 17                                   | AK005160  | 5.4108  | 6.7709  | -1.3601 |
| 1417292_at   | Ifi47         | interferon gamma inducible protein 47                            | NM_008330 | 8.6003  | 9.9618  | -1.3614 |
| 1436296_x_at | Dnaic2        | dynein, axonemal, intermediate chain 2                           | BE946605  | 8.3010  | 9.6746  | -1.3736 |
| 1448734_at   | Cp            | ceruloplasmin                                                    | BB332449  | 9.2067  | 10.5871 | -1.3804 |
| 1449025_at   | Ifit3         | interferon-induced protein with tetratricopeptide repeats 3      | NM_010501 | 10.7179 | 12.1050 | -1.3871 |
| 1428260_at   | Atl1          | atlastin GTPase 1                                                | BE948928  | 6.4898  | 7.8798  | -1.3900 |
| 1452514_a_at | Kit           | kit oncogene                                                     | X65997    | 6.7753  | 8.1710  | -1.3956 |
| 1416965_at   | Pcsk1n        | proprotein convertase subtilisin/kexin type 1 inhibitor          | AF181560  | 5.7515  | 7.1485  | -1.3969 |
| 1434186_at   | Lpar4         | lysophosphatidic acid receptor 4                                 | BB297502  | 8.5139  | 9.9132  | -1.3993 |
| 1460196_at   | Cbr1          | carbonyl reductase 1                                             | NM_007620 | 5.8041  | 7.2050  | -1.4008 |
| 1448768_at   | Mog           | myelin oligodendrocyte glycoprotein                              | U64572    | 7.8961  | 9.2982  | -1.4021 |
| 1433582_at   | 1190002N15Rik | RIKEN cDNA 1190002N15 gene                                       | AV309085  | 7.6193  | 9.0220  | -1.4027 |
| 1435378_at   | 2210020M01Rik | RIKEN cDNA 2210020M01 gene                                       | BE852759  | 5.3850  | 6.7928  | -1.4077 |
| 1417883_at   | Gstt2         | glutathione S-transferase, theta 2                               | BC012707  | 5.0544  | 6.4639  | -1.4095 |
| 1418536_at   | H2-Q7         | histocompatibility 2, Q region locus 7                           | M29881    | 7.8572  | 9.2673  | -1.4101 |
| 1430600_at   | Cmtm5         | CKLF-like MARVEL transmembrane domain containing 5               | AK013666  | 8.0105  | 9.4464  | -1.4359 |
| 1450673_at   | Col9a2        | collagen, type IX, alpha 2                                       | NM_007741 | 7.2050  | 8.6422  | -1.4372 |
| 1436325_at   | Rora          | RAR-related orphan receptor alpha                                | BB306272  | 3.9473  | 5.3978  | -1.4505 |
| 1424714_at   | Aldoc         | aldolase C, fructose-bisphosphate                                | BC008184  | 4.3251  | 5.7781  | -1.4530 |
| 1428738_a_at | D14Ert449e    | DNA segment, Chr 14, ERATO Doi 449, expressed                    | BG072279  | 5.7245  | 7.1845  | -1.4600 |
| 1450165_at   | Sln2          | schlafen 2                                                       | NM_011408 | 6.2831  | 7.7444  | -1.4614 |
| 1424383_at   | Tmem51        | transmembrane protein 51                                         | BC003277  | 4.2855  | 5.7515  | -1.4661 |
| 1418240_at   | Gbp2          | guanylate binding protein 2                                      | NM_010260 | 8.7611  | 10.2283 | -1.4671 |
| 1451655_at   | Sln8          | schlafen 8                                                       | BC024709  | 7.5121  | 8.9817  | -1.4696 |
| 1439665_at   | Lpar4         | lysophosphatidic acid receptor 4                                 | BB417145  | 8.1114  | 9.5879  | -1.4765 |
| 1416830_at   | 0610031J06Rik | RIKEN cDNA 0610031J06 gene                                       | NM_020003 | 5.9685  | 7.4474  | -1.4789 |
| 1448154_at   | Ndr2          | N-myc downstream regulated gene 2                                | NM_013864 | 6.8973  | 8.3785  | -1.4811 |
| 1456984_at   | Scm2          | sex comb on midleg-like 2 (Drosophila)                           | AV322078  | 5.6970  | 7.1787  | -1.4817 |
| 1428571_at   | Col9a1        | collagen, type IX, alpha 1                                       | AK004383  | 8.8102  | 10.2983 | -1.4881 |
| 1453724_a_at | Serpinf1      | serine (or cysteine) peptidase inhibitor, clade F, member 1      | AK012411  | 7.4602  | 8.9490  | -1.4888 |
| 1452424_at   | Lpar4         | lysophosphatidic acid receptor 4                                 | AW493905  | 6.4073  | 7.8961  | -1.4888 |
| 1417793_at   | Irgm2         | immunity-related GTPase family M member 2                        | NM_019440 | 9.2067  | 10.6980 | -1.4913 |
| 1437671_x_at | Prss23        | protease, serine, 23                                             | BB378796  | 6.0139  | 7.5068  | -1.4929 |
| 1418953_at   | Fbxo16        | F-box protein 16                                                 | NM_015795 | 5.0107  | 6.5078  | -1.4971 |
| 1419604_at   | Zbp1          | Z-DNA binding protein 1                                          | NM_021394 | 6.2200  | 7.7180  | -1.4980 |
| 1422140_at   |               |                                                                  | NM_033616 | 5.6402  | 7.1383  | -1.4980 |
| 1447771_at   |               |                                                                  | AW050081  | 4.4075  | 5.9119  | -1.5044 |
| 1419057_at   | Slc5a1        | solute carrier family 5 (sodium/glucose cotransporter), member 1 | AF208031  | 4.3783  | 5.8889  | -1.5106 |
| 1417251_at   | Palmd         | palmdelphin                                                      | NM_023245 | 6.5268  | 8.0419  | -1.5151 |
| 1427747_a_at | Lcn2          | lipocalin 2                                                      | X14607    | 4.4885  | 6.0040  | -1.5155 |
| 1421204_a_at | Nudt16        | nudix (nucleoside diphosphate linked moiety X)-type motif 16     | NM_029385 | 5.6970  | 7.2157  | -1.5188 |
| 1419658_at   |               |                                                                  | NM_010398 | 5.6689  | 7.1952  | -1.5263 |
| 1441054_at   | Apol8         | apolipoprotein L 8                                               | BB312717  | 3.6970  | 5.2240  | -1.5270 |
| 1450484_a_at | Cmpk2         | cytidine monophosphate (UMP-CMP) kinase 2, mitochondrial         | AK004595  | 7.9936  | 9.5253  | -1.5316 |
| 1436996_x_at | Lyz1          | lysozyme 1                                                       | AV066625  | 4.3588  | 5.8912  | -1.5325 |
| 1424354_at   | Tmem140       | transmembrane protein 140                                        | BC020080  | 5.6402  | 7.1750  | -1.5348 |
| 1428443_a_at | Rap1gap       | Rap1 GTPase-activating protein                                   | AK005063  | 6.6421  | 8.1788  | -1.5367 |
| 1418359_at   | Wbscr27       | Williams Beuren syndrome chromosome region 27 (human)            | NM_024479 | 5.6110  | 7.1485  | -1.5374 |
| 1456480_at   | Fry           | furry homolog (Drosophila)                                       | BB527078  | 4.6127  | 6.1530  | -1.5403 |
| 1419442_at   | Matn2         | matrielin 2                                                      | BC005429  | 9.5753  | 11.1236 | -1.5483 |
| 1427054_s_at | Abi3bp        | ABI gene family, member 3 (NESH) binding protein                 | BC026627  | 4.4990  | 6.0489  | -1.5499 |
| 1450065_at   | Adcy7         | adenylate cyclase 7                                              | NM_007406 | 4.4990  | 6.0489  | -1.5499 |
| 1451777_at   | Ddx60         | DEAD (Asp-Glu-Ala-Asp) box polypeptide 60                        | BC013672  | 6.1607  | 7.7111  | -1.5504 |

|              |               |                                                                                 |           |         |         |         |
|--------------|---------------|---------------------------------------------------------------------------------|-----------|---------|---------|---------|
| 1425321_a_at | Clmn          | calmin                                                                          | AB059644  | 4.1689  | 5.7245  | -1.5556 |
| 1423640_at   | Synpr         | synaptoporin                                                                    | BC026512  | 8.3452  | 9.9012  | -1.5559 |
| 1424050_s_at | Fgfr1         | fibroblast growth factor receptor 1                                             | M33760    | 6.4802  | 8.0382  | -1.5580 |
| 1439114_at   | Ddx60         | DEAD (Asp-Glu-Ala-Asp) box polypeptide 60                                       | BB234229  | 5.4153  | 6.9873  | -1.5720 |
| 1447927_at   |               |                                                                                 | BG092512  | 8.4548  | 10.0309 | -1.5761 |
| 1455978_a_at | Matn2         | matrilin 2                                                                      | BB338441  | 9.3209  | 10.9103 | -1.5894 |
| 1427277_at   | Six1          | sine oculis-related homeobox 1                                                  | BB137929  | 4.9195  | 6.5156  | -1.5961 |
| 1426621_a_at | Ppp2r2b       | protein phosphatase 2 (formerly 2A), regulatory subunit B (PR 52), beta isoform | BB560759  | 6.3554  | 7.9573  | -1.6020 |
| 1435906_x_at | Gbp2          | guanylate binding protein 2                                                     | BE197524  | 9.1264  | 10.7361 | -1.6097 |
| 1430105_at   | 1700042O10Rik | RIKEN cDNA 1700042O10 gene                                                      | AK006690  | 5.0544  | 6.6801  | -1.6256 |
| 1438676_at   | Gbp6          | guanylate binding protein 6                                                     | BM241485  | 7.5765  | 9.2067  | -1.6302 |
| 1450455_s_at |               |                                                                                 | AF177041  | 3.7795  | 5.4208  | -1.6413 |
| 1439884_at   | Nudt16        | nudix (nucleoside diphosphate linked moiety X)-type motif 16                    | AI851783  | 4.8719  | 6.5190  | -1.6471 |
| 1442130_at   | Hsh2d         | hematopoietic SH2 domain containing                                             | BG091940  | 4.7814  | 6.4341  | -1.6527 |
| 1417580_s_at |               |                                                                                 | NM_019414 | 5.3851  | 7.0394  | -1.6542 |
| 1419042_at   | ligp1         | interferon inducible GTPase 1                                                   | BM239828  | 7.8716  | 9.5298  | -1.6582 |
| 1458662_at   |               |                                                                                 | BB546123  | 4.4400  | 6.0989  | -1.6589 |
| 1416149_at   | Olig1         | oligodendrocyte transcription factor 1                                          | AB038696  | 8.7611  | 10.4219 | -1.6608 |
| 1431008_at   |               |                                                                                 | BG916808  | 6.7506  | 8.4271  | -1.6766 |
| 1419872_at   | Csf1r         | colony stimulating factor 1 receptor                                            | AI323359  | 4.5187  | 6.2005  | -1.6817 |
| 1435123_at   | Efr3b         | EFR3 homolog B (S. cerevisiae)                                                  | BB795377  | 7.4447  | 9.1290  | -1.6843 |
| 1451804_a_at | Lrrc16a       | leucine rich repeat containing 16A                                              | BC012229  | 3.5815  | 5.2685  | -1.6870 |
| 1416003_at   | Cldn11        | claudin 11                                                                      | NM_008770 | 8.6954  | 10.3958 | -1.7004 |
| 1425078_x_at | C130026I21Rik | RIKEN cDNA C130026I21 gene                                                      | BC007193  | 4.1854  | 5.8877  | -1.7023 |
| 1439831_at   |               |                                                                                 | AW111920  | 6.9332  | 8.6386  | -1.7054 |
| 1448321_at   | Smoc1         | SPARC related modular calcium binding 1                                         | NM_022316 | 5.3765  | 7.0897  | -1.7131 |
| 1419043_a_at | ligp1         | interferon inducible GTPase 1                                                   | BM239828  | 8.7918  | 10.5126 | -1.7207 |
| 1453159_at   | Efhc1         | EF-hand domain (C-terminal) containing 1                                        | AK006489  | 4.2333  | 5.9618  | -1.7285 |
| 1448416_at   | Mgp           | matrix Gla protein                                                              | NM_008597 | 10.5371 | 12.2693 | -1.7322 |
| 1452670_at   | Myl9          | myosin, light polypeptide 9, regulatory                                         | AK007972  | 3.9024  | 5.6371  | -1.7347 |
| 1460038_at   | Pou3f1        | POU domain, class 3, transcription factor 1                                     | BG065255  | 4.8719  | 6.6186  | -1.7467 |
| 1436244_a_at | Tle2          | transducin-like enhancer of split 2, homolog of Drosophila E(spl)               | AU067681  | 5.6666  | 7.4168  | -1.7502 |
| 1429592_at   | Lhfp13        | lipoma HMGIC fusion partner-like 3                                              | BB274911  | 4.1654  | 5.9326  | -1.7673 |
| 1416168_at   | Serpinf1      | serine (or cysteine) peptidase inhibitor, clade F, member 1                     | NM_011340 | 7.9139  | 9.6944  | -1.7805 |
| 1416268_at   | Ets2          | E26 avian leukemia oncogene 2, 3' domain                                        | BC005486  | 6.6964  | 8.4860  | -1.7896 |
| 1416645_a_at | Afp           | alpha fetoprotein                                                               | NM_007423 | 3.4601  | 5.2685  | -1.8084 |
| 1443832_s_at | Sdpr          | serum deprivation response                                                      | AV064339  | 4.5566  | 6.3729  | -1.8163 |
| 1428803_at   | Acot6         | acyl-CoA thioesterase 6                                                         | AK014558  | 5.5812  | 7.4168  | -1.8356 |
| 1450699_at   | Selenbp1      | selenium binding protein 1                                                      | NM_009150 | 5.3414  | 7.1860  | -1.8446 |
| 1443219_at   |               |                                                                                 | BM232535  | 4.4400  | 6.3015  | -1.8615 |
| 1435473_at   | Ppp1r26       | protein phosphatase 1, regulatory subunit 26                                    | AV271807  | 5.0117  | 6.9073  | -1.8956 |
| 1421694_a_at | Vcan          | versican                                                                        | NM_019389 | 5.4771  | 7.3912  | -1.9141 |
| 1419063_at   | Ugt8a         | UDP galactosyltransferase 8A                                                    | NM_011674 | 8.4358  | 10.3607 | -1.9249 |
| 1455431_at   | Slc5a1        | solute carrier family 5 (sodium/glucose cotransporter), member 1                | AV371434  | 3.0752  | 5.0340  | -1.9588 |
| 1430802_at   |               |                                                                                 | AK013097  | 6.3197  | 8.3032  | -1.9835 |
| 1449556_at   |               |                                                                                 | NM_010398 | 8.5142  | 10.5251 | -2.0109 |
| 1442338_at   |               |                                                                                 | BB740904  | 6.5424  | 8.5579  | -2.0156 |
| 1427257_at   | Vcan          | versican                                                                        | BM251152  | 4.9195  | 6.9643  | -2.0449 |
| 1450784_at   | Reck          | reversion-inducing-cysteine-rich protein with kazal motifs                      | NM_016678 | 7.5511  | 9.6059  | -2.0548 |
| 1427301_at   | Cd48          | CD48 antigen                                                                    | BE634960  | 3.9024  | 5.9599  | -2.0575 |
| 1429195_at   | Apol6         | apolipoprotein L 6                                                              | AK010208  | 6.0489  | 8.1125  | -2.0635 |
| 1416411_at   | Gstm2         | glutathione S-transferase, mu 2                                                 | NM_008183 | 6.4295  | 8.5028  | -2.0734 |
| 1440884_s_at | A530047J11Rik | RIKEN cDNA A530047J11 gene                                                      | BB218047  | 3.3818  | 5.4771  | -2.0953 |
| 1459807_x_at | P4htm         | prolyl 4-hydroxylase, transmembrane (endoplasmic reticulum)                     | BB306202  | 4.8719  | 6.9711  | -2.0992 |
| 1448136_at   | Enpp2         | ectonucleotide pyrophosphatase/phosphodiesterase 2                              | BC003264  | 10.1296 | 12.2583 | -2.1287 |
| 1447774_x_at | 5730469M10Rik | RIKEN cDNA 5730469M10 gene                                                      | AV332575  | 2.9592  | 5.0970  | -2.1378 |
| 1427044_a_at | Amph          | amphiphysin                                                                     | BQ177140  | 3.2643  | 5.4108  | -2.1465 |
| 1449009_at   |               |                                                                                 | NM_011579 | 9.0217  | 11.2475 | -2.2257 |
| 1416778_at   | Sdpr          | serum deprivation response                                                      | BE197945  | 5.2858  | 7.5511  | -2.2652 |

|              |               |                                                         |           |        |         |         |
|--------------|---------------|---------------------------------------------------------|-----------|--------|---------|---------|
| 1452366_at   | Csgalnact1    | chondroitin sulfate N-acetylgalactosaminyltransferase 1 | AV371987  | 4.3171 | 6.6129  | -2.2958 |
| 1416779_at   | Sdpr          | serum deprivation response                              | BE197945  | 4.3035 | 6.6049  | -2.3014 |
| 1452716_at   | 5730469M10Rik | RIKEN cDNA 5730469M10 gene                              | AK017688  | 5.3847 | 7.8022  | -2.4175 |
| 1427256_at   | Vcan          | versican                                                | BM251152  | 5.6402 | 8.2218  | -2.5815 |
| 1460258_at   | Lect1         | leukocyte cell derived chemotaxin 1                     | NM_010701 | 9.1460 | 11.7537 | -2.6076 |
| 1453211_at   | Ccdc89        | coiled-coil domain containing 89                        | BB470050  | 3.1531 | 5.8947  | -2.7416 |
| 1440370_at   | Abca13        | ATP-binding cassette, sub-family A (ABC1), member 13    | BB277120  | 3.8342 | 6.7933  | -2.9591 |
| 1417741_at   | Pygl          | liver glycogen phosphorylase                            | NM_133198 | 3.2854 | 6.2707  | -2.9853 |
| 1446715_at   | Abca13        | ATP-binding cassette, sub-family A (ABC1), member 13    | BB503961  | 4.1035 | 7.1003  | -2.9968 |
| 1416211_a_at | Ptn           | pleiotrophin                                            | BC002064  | 6.0489 | 9.4627  | -3.4137 |
| 1448254_at   | Ptn           | pleiotrophin                                            | BC002064  | 5.7515 | 10.4293 | -4.6777 |
